# Supplementary material for: Phosphoproteome analysis of cerebrospinal fluid extracellular vesicles in primary central nervous system lymphoma
Source: Royal Society of Chemistry journal article supplement (doi:10.1039/d3an00670k), 2023-01-01
Supplement: d3an00670k2.zip [file S1-EVTRAP vs Centrifugation.xlsx]

## Sheet: proteins
Protein Group	Protein ID	Accession	Area Sample Centrifugation1	Area Sample Centrifugation2	Area Sample Centrifugation3	Area Sample EVTRAP1	Area Sample EVTRAP2	Area Sample EVTRAP3	#Peptides	#Unique	#Spec Sample 1	#Spec Sample 2	#Spec Sample 3	#Spec Sample 4	#Spec Sample 5	#Spec Sample 6	PTM	Avg. Mass	Description
4	12	P0C0L5|CO4B_HUMAN	77459	85524	60781	281690	282220	280670	453	37	611	635	587	1511	1446	1398	Carbamidomethylation; Oxidation (M); Acetylation (Protein N-term)	192750	Complement C4-B OS=Homo sapiens OX=9606 GN=C4B PE=1 SV=2
5	11	P0C0L4|CO4A_HUMAN	45516	46409	36773	122860	193180	165830	433	17	617	649	599	1463	1414	1366	Carbamidomethylation; Oxidation (M); Acetylation (Protein N-term)	192784	Complement C4-A OS=Homo sapiens OX=9606 GN=C4A PE=1 SV=2
6	24	P02751|FINC_HUMAN	1576300	1720800	1368700	9818600	10082000	8926700	412	412	532	602	536	1437	1516	1437	Carbamidomethylation; Oxidation (M)	262622	Fibronectin OS=Homo sapiens OX=9606 GN=FN1 PE=1 SV=4
3	9	P01024|CO3_HUMAN	1938400	2209200	1732400	12561000	12707000	10600000	389	388	676	776	701	1775	1767	1693	Carbamidomethylation; Oxidation (M); Acetylation (Protein N-term)	187147	Complement C3 OS=Homo sapiens OX=9606 GN=C3 PE=1 SV=2
1	6	P02768|ALBU_HUMAN	47292000	49958000	42783000	14542000	14682000	13214000	348	347	3709	3562	3262	1357	1315	1186	Carbamidomethylation; Oxidation (M); Acetylation (Protein N-term)	69367	Serum albumin OS=Homo sapiens OX=9606 GN=ALB PE=1 SV=2
2	32	P0DOX5|IGG1_HUMAN	911810	1042400	912120	19134000	22975000	19513000	205	85	315	350	308	2229	2339	2077	Carbamidomethylation; Oxidation (M); Acetylation (Protein N-term)	49329	Immunoglobulin gamma-1 heavy chain OS=Homo sapiens OX=9606 PE=1 SV=2
8	16	P06396|GELS_HUMAN	2141600	2311400	1816900	11928000	12316000	11251000	246	243	417	468	455	1360	1355	1335	Carbamidomethylation; Oxidation (M); Acetylation (Protein N-term)	85697	Gelsolin OS=Homo sapiens OX=9606 GN=GSN PE=1 SV=1
14	27	Q13822|ENPP2_HUMAN	106410	144720	99751	7981500	8106000	6554100	207	207	101	140	112	925	908	820	Carbamidomethylation; Oxidation (M)	98994	Ectonucleotide pyrophosphatase/phosphodiesterase family member 2 OS=Homo sapiens OX=9606 GN=ENPP2 PE=1 SV=3
25	45	P00751|CFAB_HUMAN	85409	118590	88713	4250900	4363800	3816600	142	142	79	113	90	597	628	579	Carbamidomethylation; Oxidation (M); Acetylation (Protein N-term)	85533	Complement factor B OS=Homo sapiens OX=9606 GN=CFB PE=1 SV=2
20	3	P23142|FBLN1_HUMAN	672940	783750	549060	6282800	5952900	5318700	135	135	216	244	212	702	679	631	Carbamidomethylation; Oxidation (M)	77214	Fibulin-1 OS=Homo sapiens OX=9606 GN=FBLN1 PE=1 SV=4
17	48	P36955|PEDF_HUMAN	180580	303630	190200	10095000	9622200	9670900	169	169	79	99	83	874	869	841	Carbamidomethylation; Oxidation (M); Acetylation (Protein N-term)	46312	Pigment epithelium-derived factor OS=Homo sapiens OX=9606 GN=SERPINF1 PE=1 SV=4
32	91	P10643|CO7_HUMAN	167860	200950	148420	3705000	3793800	3527100	130	130	131	130	119	512	540	518	Carbamidomethylation; Oxidation (M)	93518	Complement component C7 OS=Homo sapiens OX=9606 GN=C7 PE=1 SV=2
7	22	P10909|CLUS_HUMAN	10096000	10755000	9140100	14810000	14037000	11997000	240	240	907	944	878	1128	1125	1016	Carbamidomethylation; Oxidation (M)	52495	Clusterin OS=Homo sapiens OX=9606 GN=CLU PE=1 SV=1
11	25	P08603|CFAH_HUMAN	617010	747680	539570	10383000	10752000	9023800	202	171	283	326	264	1218	1238	1167	Carbamidomethylation; Oxidation (M)	139096	Complement factor H OS=Homo sapiens OX=9606 GN=CFH PE=1 SV=4
15	14	P04264|K2C1_HUMAN	1382100	1457500	1227200	3215700	3701700	3145800	174	144	446	475	419	572	549	520	Carbamidomethylation; Oxidation (M); Acetylation (Protein N-term)	66039	Keratin type II cytoskeletal 1 OS=Homo sapiens OX=9606 GN=KRT1 PE=1 SV=6
29	62	O94985|CSTN1_HUMAN	175160	216130	147290	3940500	3938400	3935900	143	141	119	128	136	577	521	518	Carbamidomethylation; Oxidation (M); Acetylation (Protein N-term)	109793	Calsyntenin-1 OS=Homo sapiens OX=9606 GN=CLSTN1 PE=1 SV=1
34	1	P13645|K1C10_HUMAN	917130	1042700	837980	1507300	1506400	1231500	101	82	267	279	271	299	291	277	Carbamidomethylation; Oxidation (M); Acetylation (Protein N-term)	58827	Keratin type I cytoskeletal 10 OS=Homo sapiens OX=9606 GN=KRT10 PE=1 SV=6
19	54	P05067|A4_HUMAN	1013200	1165100	880450	5874800	6595700	5318600	130	128	252	277	260	636	666	603	Carbamidomethylation; Oxidation (M); Acetylation (Protein N-term)	86943	Amyloid-beta precursor protein OS=Homo sapiens OX=9606 GN=APP PE=1 SV=3
23	4	P35527|K1C9_HUMAN	1035700	1236400	905690	2533300	2347200	1885300	116	115	306	312	273	463	423	400	Carbamidomethylation; Oxidation (M)	62064	Keratin type I cytoskeletal 9 OS=Homo sapiens OX=9606 GN=KRT9 PE=1 SV=3
9	231	P01859|IGHG2_HUMAN	241420	278900	104410	916330	879810	1411500	139	32	270	299	271	1312	1392	1288	Carbamidomethylation; Oxidation (M); Acetylation (Protein N-term)	35901	Immunoglobulin heavy constant gamma 2 OS=Homo sapiens OX=9606 GN=IGHG2 PE=1 SV=2
28	122	P51693|APLP1_HUMAN	1495600	1609300	1224800	2979500	2892600	2501100	107	107	311	307	281	380	388	360	Carbamidomethylation; Oxidation (M)	72176	Amyloid-like protein 1 OS=Homo sapiens OX=9606 GN=APLP1 PE=1 SV=3
12	264	P01861|IGHG4_HUMAN	30887	31097	21699	360770	422140	349840	108	18	174	187	144	971	1022	931	Carbamidomethylation; Oxidation (M); Acetylation (Protein N-term)	35941	Immunoglobulin heavy constant gamma 4 OS=Homo sapiens OX=9606 GN=IGHG4 PE=1 SV=1
10	10	P02649|APOE_HUMAN	2695300	2960500	2374700	18056000	18939000	16067000	176	176	341	373	318	1243	1253	1209	Carbamidomethylation; Oxidation (M); Acetylation (Protein N-term)	36154	Apolipoprotein E OS=Homo sapiens OX=9606 GN=APOE PE=1 SV=1
80	147	P04114|APOB_HUMAN	60.851	201.61	0	333370	336710	255880	180	179	1	5	1	256	235	236	Carbamidomethylation; Oxidation (M); Acetylation (Protein N-term)	515611	Apolipoprotein B-100 OS=Homo sapiens OX=9606 GN=APOB PE=1 SV=2
46	17	P00747|PLMN_HUMAN	281880	310890	214710	981410	1014900	784750	104	101	168	192	156	266	264	275	Carbamidomethylation; Oxidation (M)	90569	Plasminogen OS=Homo sapiens OX=9606 GN=PLG PE=1 SV=2
40	426	P04156|PRIO_HUMAN	735590	802810	615510	1198600	1286900	1079500	95	95	209	206	200	254	283	260	Carbamidomethylation; Oxidation (M)	27661	Major prion protein OS=Homo sapiens OX=9606 GN=PRNP PE=1 SV=1
27	124	P02671|FIBA_HUMAN	1452500	1547800	1290100	2600600	2621200	1981300	119	119	334	323	303	386	371	340	Carbamidomethylation; Oxidation (M); Acetylation (Protein N-term)	94973	Fibrinogen alpha chain OS=Homo sapiens OX=9606 GN=FGA PE=1 SV=2
56	129	P98160|PGBM_HUMAN	33563	40102	23684	301380	337940	232370	164	164	87	100	86	235	259	254	Carbamidomethylation	468835	Basement membrane-specific heparan sulfate proteoglycan core protein OS=Homo sapiens OX=9606 GN=HSPG2 PE=1 SV=4
16	203	P01860|IGHG3_HUMAN	21531	28106	18597	1012900	912900	820840	109	23	149	183	160	777	817	774	Carbamidomethylation; Oxidation (M)	41287	Immunoglobulin heavy constant gamma 3 OS=Homo sapiens OX=9606 GN=IGHG3 PE=1 SV=2
90	175	Q86YZ3|HORN_HUMAN	42033	31359	23911	168280	164880	114230	94	94	97	85	82	144	141	134	Carbamidomethylation	282389	Hornerin OS=Homo sapiens OX=9606 GN=HRNR PE=1 SV=2
35	36	P05060|SCG1_HUMAN	578980	657490	496330	1539900	1594300	1157500	100	100	234	229	210	298	344	280	Carbamidomethylation; Oxidation (M)	78276	Secretogranin-1 OS=Homo sapiens OX=9606 GN=CHGB PE=1 SV=2
53	56	P00450|CERU_HUMAN	120780	133520	98667	744080	777840	621390	108	108	110	117	101	260	285	243	Carbamidomethylation; Oxidation (M); Acetylation (Protein N-term)	122205	Ceruloplasmin OS=Homo sapiens OX=9606 GN=CP PE=1 SV=1
39	46	P02679|FIBG_HUMAN	1505300	1684900	1327000	2470800	2587000	2120100	73	73	257	274	230	266	253	226	Carbamidomethylation; Oxidation (M)	51512	Fibrinogen gamma chain OS=Homo sapiens OX=9606 GN=FGG PE=1 SV=3
33	202	P02749|APOH_HUMAN	591310	619780	502630	7452700	7195700	6579400	89	89	131	132	120	469	477	469	Carbamidomethylation; Oxidation (M)	38298	Beta-2-glycoprotein 1 OS=Homo sapiens OX=9606 GN=APOH PE=1 SV=3
37	53	Q8WXD2|SCG3_HUMAN	625070	702320	512580	3099200	3241800	2676300	79	79	175	181	174	355	345	311	Oxidation (M)	53005	Secretogranin-3 OS=Homo sapiens OX=9606 GN=SCG3 PE=1 SV=3
65	30	P02748|CO9_HUMAN	174760	208550	150740	1814000	1877400	1631600	67	67	84	95	79	225	217	215	Carbamidomethylation; Oxidation (M)	63173	Complement component C9 OS=Homo sapiens OX=9606 GN=C9 PE=1 SV=2
24	31	P02675|FIBB_HUMAN	1496600	1725300	1228100	2842700	2912400	2544400	92	92	337	346	329	387	386	392	Carbamidomethylation; Oxidation (M)	55928	Fibrinogen beta chain OS=Homo sapiens OX=9606 GN=FGB PE=1 SV=2
61	57	P12109|CO6A1_HUMAN	77089	90474	67427	939330	1054900	774940	92	92	79	85	93	232	241	226	Carbamidomethylation; Oxidation (M)	108529	Collagen alpha-1(VI) chain OS=Homo sapiens OX=9606 GN=COL6A1 PE=1 SV=3
72	47	P08253|MMP2_HUMAN	20101	26752	16860	864970	902120	717420	69	68	46	50	48	215	223	224	Carbamidomethylation; Oxidation (M)	73882	72 kDa type IV collagenase OS=Homo sapiens OX=9606 GN=MMP2 PE=1 SV=2
36	307	P24592|IBP6_HUMAN	228350	333440	196940	4250500	4080100	2722600	75	75	80	100	76	441	467	386	Carbamidomethylation; Oxidation (M)	25322	Insulin-like growth factor-binding protein 6 OS=Homo sapiens OX=9606 GN=IGFBP6 PE=1 SV=1
52	43	P09871|C1S_HUMAN	101780	117690	82940	1650100	1675900	1431900	86	85	84	88	70	300	312	292	Carbamidomethylation; Oxidation (M)	76685	Complement C1s subcomponent OS=Homo sapiens OX=9606 GN=C1S PE=1 SV=1
59	103	Q15113|PCOC1_HUMAN	159810	188320	143680	1401500	1448800	1212700	81	81	83	84	85	243	233	247	Carbamidomethylation; Oxidation (M)	47973	Procollagen C-endopeptidase enhancer 1 OS=Homo sapiens OX=9606 GN=PCOLCE PE=1 SV=2
42	2	P35908|K22E_HUMAN	413130	447710	347280	478710	469680	398170	104	76	240	252	221	236	217	225	Carbamidomethylation; Oxidation (M); Acetylation (Protein N-term)	65433	Keratin type II cytoskeletal 2 epidermal OS=Homo sapiens OX=9606 GN=KRT2 PE=1 SV=2
64	73	P19021|AMD_HUMAN	187390	210430	149970	520770	541370	413330	87	87	137	134	128	163	187	184	Carbamidomethylation; Oxidation (M); Acetylation (Protein N-term)	108332	Peptidyl-glycine alpha-amidating monooxygenase OS=Homo sapiens OX=9606 GN=PAM PE=1 SV=2
99	68	P07358|CO8B_HUMAN	28421	30827	27391	573790	578660	431380	63	63	51	46	45	163	178	149	Carbamidomethylation; Oxidation (M)	67047	Complement component C8 beta chain OS=Homo sapiens OX=9606 GN=C8B PE=1 SV=3
105	133	P24043|LAMA2_HUMAN	333.86	658.73	129.34	206010	220970	165930	130	129	4	6	5	205	202	187	Carbamidomethylation	343906	Laminin subunit alpha-2 OS=Homo sapiens OX=9606 GN=LAMA2 PE=1 SV=4
31	8	P06727|APOA4_HUMAN	873610	980360	814090	4559600	4504700	3836500	105	105	213	226	208	465	427	414	Oxidation (M)	45399	Apolipoprotein A-IV OS=Homo sapiens OX=9606 GN=APOA4 PE=1 SV=3
66	153	Q9NQ79|CRAC1_HUMAN	22781	41312	19336	1268400	1261200	1118500	71	71	36	53	54	237	247	262	Carbamidomethylation; Oxidation (M)	71421	Cartilage acidic protein 1 OS=Homo sapiens OX=9606 GN=CRTAC1 PE=1 SV=2
22	622	P41222|PTGDS_HUMAN	2682900	2940900	2393000	4260500	4314800	4551400	68	68	349	383	327	532	529	526	Carbamidomethylation; Oxidation (M); Acetylation (Protein N-term)	21029	Prostaglandin-H2 D-isomerase OS=Homo sapiens OX=9606 GN=PTGDS PE=1 SV=1
30	718	P02766|TTHY_HUMAN	4504100	5166000	4186200	343550	295700	280250	60	60	562	612	576	87	80	75	Carbamidomethylation	15887	Transthyretin OS=Homo sapiens OX=9606 GN=TTR PE=1 SV=1
67	159	P78509|RELN_HUMAN	88500	117510	73549	235520	244160	230900	105	105	139	153	144	149	139	145	Carbamidomethylation; Oxidation (M); Acetylation (Protein N-term)	388389	Reelin OS=Homo sapiens OX=9606 GN=RELN PE=1 SV=3
84	38	P13671|CO6_HUMAN	18884	21297	14128	645210	662470	571570	82	82	40	37	39	207	204	186	Carbamidomethylation; Oxidation (M)	104786	Complement component C6 OS=Homo sapiens OX=9606 GN=C6 PE=1 SV=3
54	141	P01042|KNG1_HUMAN	488670	560760	420060	2035400	2034800	1739800	74	74	112	126	113	257	244	247	Carbamidomethylation; Oxidation (M)	71957	Kininogen-1 OS=Homo sapiens OX=9606 GN=KNG1 PE=1 SV=2
57	315	Q16270|IBP7_HUMAN	263180	266890	226300	3649400	3830600	3231700	65	65	63	62	59	292	277	254	Carbamidomethylation; Oxidation (M); Acetylation (Protein N-term)	29130	Insulin-like growth factor-binding protein 7 OS=Homo sapiens OX=9606 GN=IGFBP7 PE=1 SV=1
68	84	P00736|C1R_HUMAN	45092	55382	36809	1035300	1058300	972430	82	74	52	55	66	239	221	230	Carbamidomethylation; Oxidation (M); Acetylation (Protein N-term)	80119	Complement C1r subcomponent OS=Homo sapiens OX=9606 GN=C1R PE=1 SV=2
44	26	P02787|TRFE_HUMAN	1475000	1647100	1246900	265790	272910	202830	83	78	323	325	321	130	131	122	Carbamidomethylation; Oxidation (M)	77064	Serotransferrin OS=Homo sapiens OX=9606 GN=TF PE=1 SV=3
38	154	P12259|FA5_HUMAN	288140	351770	245770	1027700	1072100	930040	125	125	193	230	191	301	307	285	Carbamidomethylation; Oxidation (M)	251701	Coagulation factor V OS=Homo sapiens OX=9606 GN=F5 PE=1 SV=4
63	128	Q9Y4C0|NRX3A_HUMAN	29001	39777	25712	410950	453060	323310	91	66	84	100	81	225	230	219	Carbamidomethylation; Oxidation (M)	180598	Neurexin-3 OS=Homo sapiens OX=9606 GN=NRXN3 PE=1 SV=4
51	213	P05155|IC1_HUMAN	133470	157590	113280	2731400	2887800	2439500	69	69	75	76	75	312	314	296	Carbamidomethylation; Oxidation (M)	55154	Plasma protease C1 inhibitor OS=Homo sapiens OX=9606 GN=SERPING1 PE=1 SV=2
58	107	Q14624|ITIH4_HUMAN	234840	276350	210890	541380	567300	512220	74	74	148	159	142	191	182	166	Carbamidomethylation; Oxidation (M)	103357	Inter-alpha-trypsin inhibitor heavy chain H4 OS=Homo sapiens OX=9606 GN=ITIH4 PE=1 SV=4
98	183	P22105|TENX_HUMAN	4655	5739	3231.1	218020	238610	190800	125	125	29	35	14	182	188	188	Carbamidomethylation; Oxidation (M)	458392	Tenascin-X OS=Homo sapiens OX=9606 GN=TNXB PE=1 SV=5
78	172	P12111|CO6A3_HUMAN	14350	16014	11287	264410	284420	197020	119	119	60	62	55	188	192	194	Carbamidomethylation	343668	Collagen alpha-3(VI) chain OS=Homo sapiens OX=9606 GN=COL6A3 PE=1 SV=5
103	86	P49641|MA2A2_HUMAN	38509	37419	34418	215910	231580	190280	86	79	60	59	56	157	141	146	Carbamidomethylation	130538	Alpha-mannosidase 2x OS=Homo sapiens OX=9606 GN=MAN2A2 PE=2 SV=3
62	113	Q8N2S1|LTBP4_HUMAN	118010	132150	97043	479060	538740	380030	88	87	128	145	112	189	197	178	Carbamidomethylation	173435	Latent-transforming growth factor beta-binding protein 4 OS=Homo sapiens OX=9606 GN=LTBP4 PE=1 SV=2
21	535	P0DOX7|IGK_HUMAN	6174.3	7317.2	2236.6	9627.1	20536	47576	71	2	107	119	105	808	834	694	Carbamidomethylation; Oxidation (M); Acetylation (Protein N-term)	23379	Immunoglobulin kappa light chain OS=Homo sapiens OX=9606 PE=1 SV=1
74	63	O94769|ECM2_HUMAN	85299	94622	69796	579340	572390	474810	62	62	99	92	80	183	162	168	Carbamidomethylation; Oxidation (M)	79789	Extracellular matrix protein 2 OS=Homo sapiens OX=9606 GN=ECM2 PE=2 SV=1
55	60	O15240|VGF_HUMAN	931470	1069400	845930	414620	504670	352410	74	74	263	257	255	101	100	92	Oxidation (M)	67258	Neurosecretory protein VGF OS=Homo sapiens OX=9606 GN=VGF PE=1 SV=2
96	72	P06681|CO2_HUMAN	5879.1	6635.1	4559.2	1131500	1049000	550750	75	75	20	24	19	205	196	182	Carbamidomethylation; Oxidation (M)	83268	Complement C2 OS=Homo sapiens OX=9606 GN=C2 PE=1 SV=2
70	139	O94856|NFASC_HUMAN	25056	29710	22287	684490	728170	646700	80	80	49	51	41	220	221	228	Carbamidomethylation; Oxidation (M)	150026	Neurofascin OS=Homo sapiens OX=9606 GN=NFASC PE=1 SV=4
86	29	P35555|FBN1_HUMAN	22322	30918	16241	218080	229420	191620	101	101	87	77	67	171	161	140	Carbamidomethylation; Oxidation (M); Acetylation (Protein N-term)	312297	Fibrillin-1 OS=Homo sapiens OX=9606 GN=FBN1 PE=1 SV=4
75	152	Q9ULB1|NRX1A_HUMAN	25200	30846	14589	373280	385910	308340	80	60	75	70	67	197	182	192	Carbamidomethylation; Oxidation (M); Acetylation (Protein N-term)	161882	Neurexin-1 OS=Homo sapiens OX=9606 GN=NRXN1 PE=2 SV=1
85	333	Q9UBP4|DKK3_HUMAN	1233900	1355500	1079500	1597.5	2718.8	2104	60	60	236	238	224	5	5	3	Carbamidomethylation; Oxidation (M)	38390	Dickkopf-related protein 3 OS=Homo sapiens OX=9606 GN=DKK3 PE=1 SV=2
76	7	Q15582|BGH3_HUMAN	132120	143520	100730	600020	626420	473940	80	80	114	95	90	159	170	144	Carbamidomethylation; Oxidation (M); Acetylation (Protein N-term)	74681	Transforming growth factor-beta-induced protein ig-h3 OS=Homo sapiens OX=9606 GN=TGFBI PE=1 SV=1
77	15	P02774|VTDB_HUMAN	788290	829180	655110	37127	42950	32164	56	56	219	209	210	42	41	40	Carbamidomethylation; Oxidation (M)	52918	Vitamin D-binding protein OS=Homo sapiens OX=9606 GN=GC PE=1 SV=2
91	94	P01023|A2MG_HUMAN	129900	154430	112070	87040	92180	68661	87	86	126	147	124	81	102	94	Carbamidomethylation; Oxidation (M)	163290	Alpha-2-macroglobulin OS=Homo sapiens OX=9606 GN=A2M PE=1 SV=3
108	69	O95502|NPTXR_HUMAN	240460	242400	198610	189150	184450	176550	50	50	113	122	119	80	73	77	Carbamidomethylation; Oxidation (M)	52846	Neuronal pentraxin receptor OS=Homo sapiens OX=9606 GN=NPTXR PE=3 SV=2
18	862	P01834|IGKC_HUMAN	318980	324500	247540	2825300	3344900	2981000	60	2	119	132	120	819	832	702	Carbamidomethylation; Acetylation (Protein N-term)	11765	Immunoglobulin kappa constant OS=Homo sapiens OX=9606 GN=IGKC PE=1 SV=2
60	100	Q12860|CNTN1_HUMAN	187440	198600	148340	623030	646440	545420	88	88	115	134	123	197	194	202	Carbamidomethylation; Oxidation (M)	113320	Contactin-1 OS=Homo sapiens OX=9606 GN=CNTN1 PE=1 SV=1
113	104	P36222|CH3L1_HUMAN	2994.1	6578.8	3330.2	1117000	1146100	1003000	58	58	11	24	15	175	164	156	Carbamidomethylation; Oxidation (M); Acetylation (Protein N-term)	42625	Chitinase-3-like protein 1 OS=Homo sapiens OX=9606 GN=CHI3L1 PE=1 SV=2
41	645	P07998|RNAS1_HUMAN	19625	27691	18499	4131000	4276300	4141900	52	52	20	24	23	448	454	441	Carbamidomethylation; Oxidation (M); Acetylation (Protein N-term)	17644	Ribonuclease pancreatic OS=Homo sapiens OX=9606 GN=RNASE1 PE=1 SV=4
111	34	O95428|PPN_HUMAN	20488	22214	11759	170810	176240	126720	77	77	67	60	53	124	133	120	Carbamidomethylation	137700	Papilin OS=Homo sapiens OX=9606 GN=PAPLN PE=2 SV=4
114	50	Q15818|NPTX1_HUMAN	97656	105990	78085	600540	615930	525900	48	47	50	55	45	127	129	123	Carbamidomethylation; Oxidation (M)	47122	Neuronal pentraxin-1 OS=Homo sapiens OX=9606 GN=NPTX1 PE=2 SV=2
26	200	P02647|APOA1_HUMAN	2044200	2290300	1794000	6013400	6216900	5300100	90	90	268	266	223	435	478	412	Oxidation (M)	30778	Apolipoprotein A-I OS=Homo sapiens OX=9606 GN=APOA1 PE=1 SV=1
47	262	P18065|IBP2_HUMAN	604930	703130	534170	2475200	2460400	1874100	61	61	153	159	155	284	285	252	Carbamidomethylation; Oxidation (M)	34814	Insulin-like growth factor-binding protein 2 OS=Homo sapiens OX=9606 GN=IGFBP2 PE=1 SV=2
125	40	Q8TEU8|WFKN2_HUMAN	59322	67517	53192	390180	403380	367130	46	46	53	56	52	107	111	102	Carbamidomethylation; Oxidation (M)	63941	WAP Kazal immunoglobulin Kunitz and NTR domain-containing protein 2 OS=Homo sapiens OX=9606 GN=WFIKKN2 PE=1 SV=1
82	74	Q12805|FBLN3_HUMAN	806800	910970	707630	143630	154720	97106	51	51	184	189	182	58	64	50	Carbamidomethylation; Oxidation (M)	54641	EGF-containing fibulin-like extracellular matrix protein 1 OS=Homo sapiens OX=9606 GN=EFEMP1 PE=1 SV=2
94	39	Q14515|SPRL1_HUMAN	399810	454810	364550	46733	45187	36351	55	55	187	194	158	44	37	34	Carbamidomethylation; Oxidation (M)	75208	SPARC-like protein 1 OS=Homo sapiens OX=9606 GN=SPARCL1 PE=1 SV=2
79	78	P00734|THRB_HUMAN	284560	337290	269570	189060	188580	163380	59	59	164	170	145	89	87	82	Carbamidomethylation; Oxidation (M)	70037	Prothrombin OS=Homo sapiens OX=9606 GN=F2 PE=1 SV=2
100	42	P14618|KPYM_HUMAN	10680	17005	9405.5	680370	773860	585530	77	77	30	29	33	192	167	175	Carbamidomethylation; Oxidation (M); Acetylation (Protein N-term)	57937	Pyruvate kinase PKM OS=Homo sapiens OX=9606 GN=PKM PE=1 SV=4
93	67	P01008|ANT3_HUMAN	233080	283930	70805	565860	584890	488920	55	55	65	74	58	153	158	151	Carbamidomethylation; Oxidation (M)	52602	Antithrombin-III OS=Homo sapiens OX=9606 GN=SERPINC1 PE=1 SV=1
178	82	P11047|LAMC1_HUMAN	648.53	1610.3	96.523	112140	107910	90735	74	72	7	15	11	98	99	98	Carbamidomethylation	177602	Laminin subunit gamma-1 OS=Homo sapiens OX=9606 GN=LAMC1 PE=1 SV=3
43	146	P04196|HRG_HUMAN	83648	107090	81138	2215800	2282600	1854500	67	66	65	77	62	417	395	353	Carbamidomethylation; Oxidation (M)	59578	Histidine-rich glycoprotein OS=Homo sapiens OX=9606 GN=HRG PE=1 SV=1
13	626	P01034|CYTC_HUMAN	7153700	7919100	6224300	9507100	9359400	7468700	71	71	622	615	535	548	584	522	Carbamidomethylation; Oxidation (M); Acetylation (Protein N-term)	15799	Cystatin-C OS=Homo sapiens OX=9606 GN=CST3 PE=1 SV=1
109	155	Q9P2S2|NRX2A_HUMAN	31200	37112	27618	128100	125120	112890	70	51	91	79	82	110	112	101	Carbamidomethylation	184981	Neurexin-2 OS=Homo sapiens OX=9606 GN=NRXN2 PE=2 SV=1
130	488	P16035|TIMP2_HUMAN	109650	113590	85308	944760	851030	845130	39	39	31	32	30	139	124	116	Carbamidomethylation; Oxidation (M); Acetylation (Protein N-term)	24399	Metalloproteinase inhibitor 2 OS=Homo sapiens OX=9606 GN=TIMP2 PE=1 SV=2
141	143	Q86UX2|ITIH5_HUMAN	32858	50598	12133	336760	351040	324850	62	62	26	35	29	118	128	99	Carbamidomethylation; Oxidation (M)	104576	Inter-alpha-trypsin inhibitor heavy chain H5 OS=Homo sapiens OX=9606 GN=ITIH5 PE=2 SV=2
129	263	P04406|G3P_HUMAN	140580	159410	121300	255970	247920	204850	37	37	85	78	78	85	80	69	Carbamidomethylation; Oxidation (M)	36053	Glyceraldehyde-3-phosphate dehydrogenase OS=Homo sapiens OX=9606 GN=GAPDH PE=1 SV=3
157	5	P20062|TCO2_HUMAN	6714.9	9102.9	4994	196250	180160	163140	49	49	26	27	25	107	96	101	Carbamidomethylation; Oxidation (M)	47535	Transcobalamin-2 OS=Homo sapiens OX=9606 GN=TCN2 PE=1 SV=3
145	164	Q24JP5|T132A_HUMAN	4304.4	5959.2	3465.3	238320	255070	223630	53	53	11	19	14	124	125	123	Carbamidomethylation	110110	Transmembrane protein 132A OS=Homo sapiens OX=9606 GN=TMEM132A PE=1 SV=1
118	93	Q92859|NEO1_HUMAN	16182	18215	13139	411340	422920	350610	62	62	42	48	35	131	124	131	Carbamidomethylation	160016	Neogenin OS=Homo sapiens OX=9606 GN=NEO1 PE=1 SV=2
48	85	P01009|A1AT_HUMAN	1725300	1821800	1582600	684320	727480	562520	58	58	302	280	285	138	142	114	Carbamidomethylation; Oxidation (M); Acetylation (Protein N-term)	46737	Alpha-1-antitrypsin OS=Homo sapiens OX=9606 GN=SERPINA1 PE=1 SV=3
155	121	P01031|CO5_HUMAN	2091	3376.1	1833.4	196800	112610	157050	73	72	27	23	20	114	107	92	Carbamidomethylation	188304	Complement C5 OS=Homo sapiens OX=9606 GN=C5 PE=1 SV=4
104	64	P05546|HEP2_HUMAN	229860	276240	186480	516170	563320	431790	49	48	97	99	97	95	117	113	Carbamidomethylation; Oxidation (M)	57071	Heparin cofactor 2 OS=Homo sapiens OX=9606 GN=SERPIND1 PE=1 SV=3
135	168	O00533|NCHL1_HUMAN	241110	242760	200070	11178	16264	6342.4	53	52	122	142	130	19	20	17	Carbamidomethylation; Oxidation (M)	135071	Neural cell adhesion molecule L1-like protein OS=Homo sapiens OX=9606 GN=CHL1 PE=1 SV=4
153	71	O00391|QSOX1_HUMAN	23449	30202	18554	273190	314870	260930	53	53	33	31	27	94	107	100	Carbamidomethylation	82578	Sulfhydryl oxidase 1 OS=Homo sapiens OX=9606 GN=QSOX1 PE=1 SV=3
142	244	P01019|ANGT_HUMAN	372550	380010	326930	89121	89128	64095	46	46	113	96	89	46	41	35	Carbamidomethylation; Oxidation (M)	53154	Angiotensinogen OS=Homo sapiens OX=9606 GN=AGT PE=1 SV=1
177	174	Q13332|PTPRS_HUMAN	11086	12909	5986.4	150070	146930	124350	51	46	23	25	18	94	86	85	Carbamidomethylation; Oxidation (M)	217039	Receptor-type tyrosine-protein phosphatase S OS=Homo sapiens OX=9606 GN=PTPRS PE=1 SV=3
173	182	P23468|PTPRD_HUMAN	9559.8	11269	7447.2	114380	132500	121910	55	48	26	34	39	83	82	80	Carbamidomethylation; Oxidation (M)	214758	Receptor-type tyrosine-protein phosphatase delta OS=Homo sapiens OX=9606 GN=PTPRD PE=1 SV=2
132	75	Q02246|CNTN2_HUMAN	13333	23445	14395	261810	253920	208040	61	61	42	58	49	106	94	109	Carbamidomethylation; Oxidation (M)	113393	Contactin-2 OS=Homo sapiens OX=9606 GN=CNTN2 PE=1 SV=1
152	138	O00468|AGRIN_HUMAN	15773	20257	14100	89802	222660	71821	65	65	31	32	28	102	104	100	Carbamidomethylation	217318	Agrin OS=Homo sapiens OX=9606 GN=AGRN PE=1 SV=6
172	65	Q9UHC6|CNTP2_HUMAN	2196.9	3052.7	2127.9	173220	177040	142080	67	67	10	16	14	109	105	92	Carbamidomethylation; Oxidation (M)	148167	Contactin-associated protein-like 2 OS=Homo sapiens OX=9606 GN=CNTNAP2 PE=1 SV=1
120	114	Q92823|NRCAM_HUMAN	221870	235220	170910	12212	13671	6041.5	66	66	141	154	140	27	29	16	Carbamidomethylation; Oxidation (M)	143889	Neuronal cell adhesion molecule OS=Homo sapiens OX=9606 GN=NRCAM PE=1 SV=3
121	59	P05156|CFAI_HUMAN	48496	53538	33653	602600	665840	432840	42	41	38	41	36	133	129	129	Carbamidomethylation; Oxidation (M)	65750	Complement factor I OS=Homo sapiens OX=9606 GN=CFI PE=1 SV=2
156	228	P39060|COIA1_HUMAN	30735	36088	24521	308260	314900	244330	40	40	42	44	35	88	86	87	Carbamidomethylation; Oxidation (M)	178187	Collagen alpha-1(XVIII) chain OS=Homo sapiens OX=9606 GN=COL18A1 PE=1 SV=5
83	13	Q16610|ECM1_HUMAN	107670	111310	89693	652780	629470	515570	54	54	78	82	81	174	159	153	Carbamidomethylation; Oxidation (M)	60674	Extracellular matrix protein 1 OS=Homo sapiens OX=9606 GN=ECM1 PE=1 SV=2
81	61	P02790|HEMO_HUMAN	476000	557070	394330	342610	238250	284420	47	47	169	171	138	85	89	77	Carbamidomethylation; Oxidation (M)	51676	Hemopexin OS=Homo sapiens OX=9606 GN=HPX PE=1 SV=2
208	99	P07942|LAMB1_HUMAN	358.92	389.96	132.44	100780	111430	78996	59	59	3	6	8	84	90	82	Carbamidomethylation	198037	Laminin subunit beta-1 OS=Homo sapiens OX=9606 GN=LAMB1 PE=1 SV=2
117	55	P10645|CMGA_HUMAN	364660	449260	333290	5617.5	6382	6341.1	54	54	160	170	158	11	9	8	Carbamidomethylation; Oxidation (M)	50688	Chromogranin-A OS=Homo sapiens OX=9606 GN=CHGA PE=1 SV=7
147	119	P33908|MA1A1_HUMAN	37374	47043	31104	166300	170210	116710	47	45	49	56	52	87	88	77	Carbamidomethylation; Oxidation (M)	72969	Mannosyl-oligosaccharide 1 2-alpha-mannosidase IA OS=Homo sapiens OX=9606 GN=MAN1A1 PE=1 SV=3
127	284	O43505|B4GA1_HUMAN	406840	409430	331530	48675	51172	40337	40	40	130	133	129	27	31	29	Carbamidomethylation; Oxidation (M)	47119	Beta-1 4-glucuronyltransferase 1 OS=Homo sapiens OX=9606 GN=B4GAT1 PE=1 SV=1
50	565	P0DOX8|IGL1_HUMAN	30062	31484	23811	308270	366340	383000	52	4	64	71	71	340	360	342	Carbamidomethylation	22830	Immunoglobulin lambda-1 light chain OS=Homo sapiens OX=9606 PE=1 SV=1
97	97	P02452|CO1A1_HUMAN	45544	66248	41731	608590	631260	556930	39	39	60	65	60	145	149	160	Carbamidomethylation; Oxidation (M)	138942	Collagen alpha-1(I) chain OS=Homo sapiens OX=9606 GN=COL1A1 PE=1 SV=5
107	337	Q03591|FHR1_HUMAN	10372	11652	9457.7	152570	148450	128880	43	6	55	39	48	150	158	143	Carbamidomethylation; Oxidation (M)	37651	Complement factor H-related protein 1 OS=Homo sapiens OX=9606 GN=CFHR1 PE=1 SV=2
87	52	P55058|PLTP_HUMAN	340180	363870	291490	469970	458630	362300	58	58	119	122	107	125	111	117	Carbamidomethylation; Oxidation (M)	54739	Phospholipid transfer protein OS=Homo sapiens OX=9606 GN=PLTP PE=1 SV=1
49	234	P04004|VTNC_HUMAN	655700	712030	580610	1489800	1648700	1428100	60	60	180	177	172	241	250	234	Carbamidomethylation; Oxidation (M)	54306	Vitronectin OS=Homo sapiens OX=9606 GN=VTN PE=1 SV=1
45	731	P0DOY2|IGLC2_HUMAN	83565	58937	51656	433610	514560	318940	48	6	88	86	83	344	373	354	Carbamidomethylation	11294	Immunoglobulin lambda constant 2 OS=Homo sapiens OX=9606 GN=IGLC2 PE=1 SV=1
151	33	P07357|CO8A_HUMAN	24179	27715	17743	468640	480400	403270	36	36	22	35	23	106	96	117	Carbamidomethylation; Oxidation (M)	65163	Complement component C8 alpha chain OS=Homo sapiens OX=9606 GN=C8A PE=1 SV=2
131	19	P03952|KLKB1_HUMAN	7514.8	6902.9	5420	368190	394900	320190	58	55	31	31	19	136	132	119	Carbamidomethylation; Oxidation (M)	71370	Plasma kallikrein OS=Homo sapiens OX=9606 GN=KLKB1 PE=1 SV=1
102	28	P02533|K1C14_HUMAN	16221	19496	14598	48093	52374	40339	54	17	92	93	83	125	120	108	Carbamidomethylation; Oxidation (M)	51562	Keratin type I cytoskeletal 14 OS=Homo sapiens OX=9606 GN=KRT14 PE=1 SV=4
174	588	Q96S96|PEBP4_HUMAN	2389.9	5614.6	1206.8	478530	570800	440110	35	35	9	11	8	93	114	102	Carbamidomethylation; Oxidation (M)	25733	Phosphatidylethanolamine-binding protein 4 OS=Homo sapiens OX=9606 GN=PEBP4 PE=1 SV=3
191	181	P15924|DESP_HUMAN	5373.2	6329.6	6091	33374	50607	22381	76	76	31	49	27	62	73	57	Carbamidomethylation; Oxidation (M)	331774	Desmoplakin OS=Homo sapiens OX=9606 GN=DSP PE=1 SV=3
149	204	P29622|KAIN_HUMAN	14080	20976	15349	415400	421900	355300	45	45	30	32	27	105	106	107	Carbamidomethylation; Oxidation (M)	48542	Kallistatin OS=Homo sapiens OX=9606 GN=SERPINA4 PE=1 SV=3
123	126	Q14767|LTBP2_HUMAN	48763	54888	33435	175840	186870	144960	56	55	71	74	71	96	99	94	Carbamidomethylation; Oxidation (M); Acetylation (Protein N-term)	195051	Latent-transforming growth factor beta-binding protein 2 OS=Homo sapiens OX=9606 GN=LTBP2 PE=1 SV=3
205	77	P49747|COMP_HUMAN	273.6	1291.2	498.37	77075	96154	78810	36	30	10	13	8	82	89	74	Carbamidomethylation; Oxidation (M)	82861	Cartilage oligomeric matrix protein OS=Homo sapiens OX=9606 GN=COMP PE=1 SV=2
128	81	Q14766|LTBP1_HUMAN	32146	48983	25230	105760	123430	92113	51	50	59	65	70	96	102	86	Carbamidomethylation; Oxidation (M)	186795	Latent-transforming growth factor beta-binding protein 1 OS=Homo sapiens OX=9606 GN=LTBP1 PE=1 SV=4
143	120	P08123|CO1A2_HUMAN	32372	43941	32151	432030	417680	323460	41	41	31	42	29	99	107	111	Carbamidomethylation; Oxidation (M)	129314	Collagen alpha-2(I) chain OS=Homo sapiens OX=9606 GN=COL1A2 PE=1 SV=7
146	66	Q06481|APLP2_HUMAN	49972	57236	38097	46432	49283	34691	41	39	76	70	71	65	70	59	Carbamidomethylation; Oxidation (M)	86956	Amyloid-like protein 2 OS=Homo sapiens OX=9606 GN=APLP2 PE=1 SV=2
126	96	P13521|SCG2_HUMAN	424200	438880	339830	29032	29367	18410	49	49	130	148	143	21	20	17	Oxidation (M)	70941	Secretogranin-2 OS=Homo sapiens OX=9606 GN=SCG2 PE=1 SV=2
115	606	P05408|7B2_HUMAN	417090	418620	366850	10474	11939	8758.2	37	37	175	154	156	13	10	10	Carbamidomethylation; Oxidation (M)	23730	Neuroendocrine protein 7B2 OS=Homo sapiens OX=9606 GN=SCG5 PE=1 SV=2
150	380	P00746|CFAD_HUMAN	22924	28758	21432	561810	537420	466640	30	29	34	34	32	114	98	88	Carbamidomethylation	27033	Complement factor D OS=Homo sapiens OX=9606 GN=CFD PE=1 SV=5
184	132	P98095|FBLN2_HUMAN	17688	19980	12522	96668	109070	66140	37	37	38	44	38	62	70	60	Carbamidomethylation	126573	Fibulin-2 OS=Homo sapiens OX=9606 GN=FBLN2 PE=1 SV=2
73	421	P02765|FETUA_HUMAN	1156200	1064400	953130	54269	68824	44362	37	37	246	237	224	27	33	22	Carbamidomethylation; Oxidation (M)	39341	Alpha-2-HS-glycoprotein OS=Homo sapiens OX=9606 GN=AHSG PE=1 SV=2
181	76	P35442|TSP2_HUMAN	1360.4	2672.4	170.29	139290	153520	112090	43	39	17	25	13	93	93	84	Carbamidomethylation; Oxidation (M)	129991	Thrombospondin-2 OS=Homo sapiens OX=9606 GN=THBS2 PE=1 SV=2
183	108	P00748|FA12_HUMAN	5073	8630.5	4795.2	275060	293170	242940	52	52	12	13	14	96	96	85	Carbamidomethylation	67792	Coagulation factor XII OS=Homo sapiens OX=9606 GN=F12 PE=1 SV=3
122	435	Q92876|KLK6_HUMAN	227820	285020	199690	491070	479950	414160	27	26	77	79	78	84	95	93	Carbamidomethylation; Oxidation (M)	26856	Kallikrein-6 OS=Homo sapiens OX=9606 GN=KLK6 PE=1 SV=1
262	88	P02788|TRFL_HUMAN		130.52		105250	102800	84779	54	49	3	3	3	68	65	72	Carbamidomethylation	78182	Lactotransferrin OS=Homo sapiens OX=9606 GN=LTF PE=1 SV=6
162	92	Q8TER0|SNED1_HUMAN	10222	11365	9205.3	107750	126140	91114	50	50	44	40	35	77	86	79	Carbamidomethylation; Oxidation (M)	152203	Sushi nidogen and EGF-like domain-containing protein 1 OS=Homo sapiens OX=9606 GN=SNED1 PE=2 SV=2
207	44	Q10471|GALT2_HUMAN	3235.7	5703.5	2081.7	137660	139770	110230	45	44	19	18	17	78	78	64	Carbamidomethylation; Oxidation (M)	64733	Polypeptide N-acetylgalactosaminyltransferase 2 OS=Homo sapiens OX=9606 GN=GALNT2 PE=1 SV=1
213	177	P10586|PTPRF_HUMAN	3720.4	3468.4	2261.4	97160	99393	78485	47	45	15	17	12	66	80	78	Carbamidomethylation	212877	Receptor-type tyrosine-protein phosphatase F OS=Homo sapiens OX=9606 GN=PTPRF PE=1 SV=2
211	161	P35443|TSP4_HUMAN	10053	10624	7341.5	53237	52938	36313	39	31	38	30	32	64	54	53	Carbamidomethylation; Acetylation (Protein N-term)	105869	Thrombospondin-4 OS=Homo sapiens OX=9606 GN=THBS4 PE=1 SV=2
116	196	Q92954|PRG4_HUMAN	119980	119090	90566	234610	245210	193440	56	55	84	89	75	87	85	97	Carbamidomethylation; Oxidation (M)	151060	Proteoglycan 4 OS=Homo sapiens OX=9606 GN=PRG4 PE=1 SV=3
138	165	P19823|ITIH2_HUMAN	95540	106950	74377	131580	141910	113360	40	40	81	75	71	72	75	67	Carbamidomethylation; Oxidation (M)	106463	Inter-alpha-trypsin inhibitor heavy chain H2 OS=Homo sapiens OX=9606 GN=ITIH2 PE=1 SV=2
180	150	Q96GW7|PGCB_HUMAN	85092	105920	77663	20189	24345	17941	39	38	81	88	79	25	19	33	Carbamidomethylation; Oxidation (M)	99118	Brevican core protein OS=Homo sapiens OX=9606 GN=BCAN PE=1 SV=2
112	212	P01011|AACT_HUMAN	276240	305760	242630	229680	238580	209490	40	39	109	105	100	83	79	78	Carbamidomethylation; Oxidation (M)	47651	Alpha-1-antichymotrypsin OS=Homo sapiens OX=9606 GN=SERPINA3 PE=1 SV=2
280	189	P20930|FILA_HUMAN	2301.4	3801.4	603.08	41145	42475	28212	41	41	14	13	12	50	61	44	Oxidation (M); Acetylation (Protein N-term)	435180	Filaggrin OS=Homo sapiens OX=9606 GN=FLG PE=1 SV=3
255	280	Q9NT99|LRC4B_HUMAN	1749.6	2691.9	1918.6	154880	185600	153440	33	32	5	4	8	69	65	66	Carbamidomethylation; Oxidation (M)	76434	Leucine-rich repeat-containing protein 4B OS=Homo sapiens OX=9606 GN=LRRC4B PE=2 SV=3
161	208	Q08629|TICN1_HUMAN	18944	28398	19681	223530	262370	211520	32	31	33	45	31	82	91	89	Carbamidomethylation; Oxidation (M)	49124	Testican-1 OS=Homo sapiens OX=9606 GN=SPOCK1 PE=1 SV=1
71	83	P13647|K2C5_HUMAN	56371	65304	48776	157440	164280	138430	63	32	145	130	114	141	142	137	Carbamidomethylation; Oxidation (M); Acetylation (Protein N-term)	62378	Keratin type II cytoskeletal 5 OS=Homo sapiens OX=9606 GN=KRT5 PE=1 SV=3
144	186	Q8IUX7|AEBP1_HUMAN	53066	64109	48486	197040	216230	162660	47	46	53	53	62	77	88	86	Carbamidomethylation; Oxidation (M)	130929	Adipocyte enhancer-binding protein 1 OS=Homo sapiens OX=9606 GN=AEBP1 PE=1 SV=1
119	510	P10451|OSTP_HUMAN	406290	493970	344530	277930	310040	221700	34	34	114	107	114	65	60	50	Oxidation (M)	35423	Osteopontin OS=Homo sapiens OX=9606 GN=SPP1 PE=1 SV=1
169	253	P48745|CCN3_HUMAN	29676	42064	29077	412770	427720	302170	34	34	29	29	29	92	90	79	Carbamidomethylation; Oxidation (M); Acetylation (Protein N-term)	39162	CCN family member 3 OS=Homo sapiens OX=9606 GN=CCN3 PE=1 SV=1
133	80	P07225|PROS_HUMAN	131110	149530	116530	125220	135700	105430	46	46	82	99	81	64	66	60	Carbamidomethylation; Oxidation (M)	75123	Vitamin K-dependent protein S OS=Homo sapiens OX=9606 GN=PROS1 PE=1 SV=1
134	310	P01876|IGHA1_HUMAN	145320	166640	125540	137170	127560	99050	39	24	77	87	83	73	70	61	Carbamidomethylation; Oxidation (M)	37655	Immunoglobulin heavy constant alpha 1 OS=Homo sapiens OX=9606 GN=IGHA1 PE=1 SV=2
88	330	P20774|MIME_HUMAN	590320	651940	524160	827560	843900	774600	37	37	107	105	96	123	124	139	Carbamidomethylation	33922	Mimecan OS=Homo sapiens OX=9606 GN=OGN PE=1 SV=1
273	229	Q14118|DAG1_HUMAN	158310	120600	120850	3486.3	4126	2392.6	25	25	63	55	65	5	11	6	Carbamidomethylation; Oxidation (M); Acetylation (Protein N-term)	97441	Dystroglycan OS=Homo sapiens OX=9606 GN=DAG1 PE=1 SV=2
193	160	Q9H2X0|CHRD_HUMAN	5999.8	7241.4	1784.7	98002	106760	72437	45	45	27	26	23	76	74	72	Carbamidomethylation	102032	Chordin OS=Homo sapiens OX=9606 GN=CHRD PE=1 SV=2
197	338	P08571|CD14_HUMAN	120680	127650	105700	71395	79901	64845	30	30	70	66	58	37	34	27	Carbamidomethylation; Oxidation (M)	40076	Monocyte differentiation antigen CD14 OS=Homo sapiens OX=9606 GN=CD14 PE=1 SV=2
139	18	P63261|ACTG_HUMAN	1431.5	1187.4	1400.7	1595.5	1971.7	1134.1	35	1	75	75	67	77	73	72	Carbamidomethylation; Oxidation (M); Acetylation (Protein N-term)	41793	Actin cytoplasmic 2 OS=Homo sapiens OX=9606 GN=ACTG1 PE=1 SV=1
210	23	Q99435|NELL2_HUMAN	84402	104200	73041	6111.4	6811.8	5302.8	39	39	73	84	77	12	13	12	Carbamidomethylation; Oxidation (M)	91347	Protein kinase C-binding protein NELL2 OS=Homo sapiens OX=9606 GN=NELL2 PE=1 SV=1
140	21	P60709|ACTB_HUMAN	3612.8	3802	3260.8	1600.9	609.34	1456.5	35	1	75	75	67	76	73	72	Carbamidomethylation; Oxidation (M); Acetylation (Protein N-term)	41737	Actin cytoplasmic 1 OS=Homo sapiens OX=9606 GN=ACTB PE=1 SV=1
248	192	Q9BQT9|CSTN3_HUMAN	51715	57031	45425	52487	63353	37413	39	38	24	25	27	56	46	49	Carbamidomethylation; Oxidation (M)	106098	Calsyntenin-3 OS=Homo sapiens OX=9606 GN=CLSTN3 PE=1 SV=1
236	226	Q96PD5|PGRP2_HUMAN	54226	54483	34815	18499	17428	13215	25	25	57	52	45	31	25	23	Carbamidomethylation	62217	N-acetylmuramoyl-L-alanine amidase OS=Homo sapiens OX=9606 GN=PGLYRP2 PE=1 SV=1
321	178	Q05707|COEA1_HUMAN	321.77	804.63	435.59	47717	43582	32588	46	45	5	8	4	48	57	55	Carbamidomethylation; Acetylation (Protein N-term)	193513	Collagen alpha-1(XIV) chain OS=Homo sapiens OX=9606 GN=COL14A1 PE=1 SV=3
154	89	O00451|GFRA2_HUMAN	24915	33565	19450	373060	392560	304750	39	39	38	41	33	93	91	94	Carbamidomethylation; Oxidation (M)	51544	GDNF family receptor alpha-2 OS=Homo sapiens OX=9606 GN=GFRA2 PE=1 SV=2
196	140	P08697|A2AP_HUMAN	146770	167730	113350	22293	34410	27309	37	37	80	78	73	23	23	18	Carbamidomethylation; Oxidation (M)	54566	Alpha-2-antiplasmin OS=Homo sapiens OX=9606 GN=SERPINF2 PE=1 SV=3
247	117	Q96KN2|CNDP1_HUMAN	146960	168490	131150		427.73	0	29	29	74	77	73	0	2	1	Oxidation (M)	56706	Beta-Ala-His dipeptidase OS=Homo sapiens OX=9606 GN=CNDP1 PE=1 SV=4
277	249	Q96IY4|CBPB2_HUMAN	655.54	1061.1	594.45	169950	181730	141800	25	25	4	5	2	64	66	61	Carbamidomethylation; Oxidation (M)	48424	Carboxypeptidase B2 OS=Homo sapiens OX=9606 GN=CPB2 PE=1 SV=2
232	209	Q92743|HTRA1_HUMAN	16897	20246	13191	74693	86165	68944	36	34	28	33	38	47	48	43	Carbamidomethylation; Acetylation (Protein N-term)	51287	Serine protease HTRA1 OS=Homo sapiens OX=9606 GN=HTRA1 PE=1 SV=1
217	58	P06733|ENOA_HUMAN	10798	12193	9145.2	159290	148590	131180	33	29	26	28	27	63	62	59	Carbamidomethylation	47169	Alpha-enolase OS=Homo sapiens OX=9606 GN=ENO1 PE=1 SV=2
276	111	P04003|C4BPA_HUMAN	14213	22559	13117	186770	179860	147940	31	31	12	15	9	49	63	54	Carbamidomethylation	67033	C4b-binding protein alpha chain OS=Homo sapiens OX=9606 GN=C4BPA PE=1 SV=2
182	257	P07339|CATD_HUMAN	215760	221830	182940	51548	44684	52699	31	31	79	75	71	33	29	30	Carbamidomethylation; Oxidation (M)	44552	Cathepsin D OS=Homo sapiens OX=9606 GN=CTSD PE=1 SV=1
189	151	P11021|BIP_HUMAN	2650.9	4133.5	2673	154280	153870	120340	45	42	14	18	14	83	84	87	Carbamidomethylation; Oxidation (M)	72333	Endoplasmic reticulum chaperone BiP OS=Homo sapiens OX=9606 GN=HSPA5 PE=1 SV=2
185	173	O14594|NCAN_HUMAN	7082.6	7523	4513.9	169860	180820	129550	42	40	29	30	25	76	75	74	Carbamidomethylation	143093	Neurocan core protein OS=Homo sapiens OX=9606 GN=NCAN PE=1 SV=3
158	51	Q9BU40|CRDL1_HUMAN	36418	38604	33036	140630	154550	119080	31	31	57	58	50	66	79	69	Carbamidomethylation	52026	Chordin-like protein 1 OS=Homo sapiens OX=9606 GN=CHRDL1 PE=1 SV=2
101	109	P02538|K2C6A_HUMAN	0			3665.6	4306.8	4402.5	62	3	94	97	74	120	118	121	Carbamidomethylation; Oxidation (M); Acetylation (Protein N-term)	60045	Keratin type II cytoskeletal 6A OS=Homo sapiens OX=9606 GN=KRT6A PE=1 SV=3
242	142	Q9Y6N7|ROBO1_HUMAN	1394.6	4501.4	1397.1	87279	101600	71609	36	35	12	16	14	55	66	66	Carbamidomethylation	180928	Roundabout homolog 1 OS=Homo sapiens OX=9606 GN=ROBO1 PE=1 SV=1
159	130	P13591|NCAM1_HUMAN	273750	297850	243030	1479	2923.7	682.67	41	41	126	119	117	4	10	3	Carbamidomethylation; Oxidation (M)	94574	Neural cell adhesion molecule 1 OS=Homo sapiens OX=9606 GN=NCAM1 PE=1 SV=3
295	127	P55268|LAMB2_HUMAN	824.56	926.49	732.26	33206	40854	19967	52	52	4	8	6	57	64	49	Carbamidomethylation	195980	Laminin subunit beta-2 OS=Homo sapiens OX=9606 GN=LAMB2 PE=1 SV=2
347	236	Q92932|PTPR2_HUMAN	27835	30409	22535	47207	40146	38739	28	28	32	35	29	20	18	20	Carbamidomethylation; Oxidation (M)	111271	Receptor-type tyrosine-protein phosphatase N2 OS=Homo sapiens OX=9606 GN=PTPRN2 PE=1 SV=2
226	148	Q13217|DNJC3_HUMAN	24322	29482	20391	49305	44558	33618	38	38	39	53	36	44	41	40	Carbamidomethylation	57580	DnaJ homolog subfamily C member 3 OS=Homo sapiens OX=9606 GN=DNAJC3 PE=1 SV=1
375	158	Q8IWV2|CNTN4_HUMAN				73851	61309	50460	36	34	0	0	0	48	46	43	Carbamidomethylation	113454	Contactin-4 OS=Homo sapiens OX=9606 GN=CNTN4 PE=1 SV=1
282	149	P19827|ITIH1_HUMAN	21871	16742	11324	48876	58358	44452	30	30	21	21	21	47	40	44	Carbamidomethylation	101389	Inter-alpha-trypsin inhibitor heavy chain H1 OS=Homo sapiens OX=9606 GN=ITIH1 PE=1 SV=3
95	70	P04259|K2C6B_HUMAN				2168	2618.1	1194	58	2	96	102	84	128	117	121	Carbamidomethylation; Oxidation (M); Acetylation (Protein N-term)	60067	Keratin type II cytoskeletal 6B OS=Homo sapiens OX=9606 GN=KRT6B PE=1 SV=5
308	162	Q8N3T6|T132C_HUMAN	535.85	498.22	99.954	73006	76471	57904	36	35	5	2	3	63	54	54	Carbamidomethylation	121787	Transmembrane protein 132C OS=Homo sapiens OX=9606 GN=TMEM132C PE=2 SV=3
261	41	Q9HCB6|SPON1_HUMAN	1806.9	1799.7	1084.1	182740	165000	149560	35	35	11	13	15	56	57	62	Carbamidomethylation; Oxidation (M)	90974	Spondin-1 OS=Homo sapiens OX=9606 GN=SPON1 PE=1 SV=2
223	137	O75326|SEM7A_HUMAN	1847.7	2840	1984.4	96794	100430	74903	41	41	22	16	13	65	72	68	Carbamidomethylation	74824	Semaphorin-7A OS=Homo sapiens OX=9606 GN=SEMA7A PE=1 SV=1
254	481	P07360|CO8G_HUMAN	9328.6	12604	8514.7	232000	217660	183980	25	25	16	15	19	55	63	50	Carbamidomethylation	22277	Complement component C8 gamma chain OS=Homo sapiens OX=9606 GN=C8G PE=1 SV=3
238	169	Q6MZW2|FSTL4_HUMAN	22181	33631	21361	21675	22153	13980	37	35	42	56	54	31	26	23	Carbamidomethylation	93096	Follistatin-related protein 4 OS=Homo sapiens OX=9606 GN=FSTL4 PE=2 SV=3
206	87	P14543|NID1_HUMAN	10832	15677	8293	52702	54430	44196	40	40	42	52	31	43	47	59	Carbamidomethylation	136377	Nidogen-1 OS=Homo sapiens OX=9606 GN=NID1 PE=1 SV=3
225	479	P51884|LUM_HUMAN	108740	120100	88861	126620	140760	126520	21	21	45	38	43	46	41	42	Carbamidomethylation	38429	Lumican OS=Homo sapiens OX=9606 GN=LUM PE=1 SV=2
167	157	Q9NRN5|OLFL3_HUMAN	40881	50435	35607	236950	244930	202640	36	35	45	53	41	74	74	64	Carbamidomethylation; Oxidation (M)	46010	Olfactomedin-like protein 3 OS=Homo sapiens OX=9606 GN=OLFML3 PE=2 SV=1
137	1134	P02652|APOA2_HUMAN	279330	216650	182840	625390	524590	621000	25	25	57	47	41	103	92	103	Carbamidomethylation	11175	Apolipoprotein A-II OS=Homo sapiens OX=9606 GN=APOA2 PE=1 SV=1
285	197	O15031|PLXB2_HUMAN	20724	20942	15717	5428.8	5854.2	6298.1	35	35	55	47	43	17	14	16	Carbamidomethylation	205126	Plexin-B2 OS=Homo sapiens OX=9606 GN=PLXNB2 PE=1 SV=3
166	79	P07602|SAP_HUMAN	212510	246050	193180	49367	53578	50028	44	44	78	81	83	37	36	38	Carbamidomethylation	58113	Prosaposin OS=Homo sapiens OX=9606 GN=PSAP PE=1 SV=2
69	444	P05090|APOD_HUMAN	2954100	2884700	2462600	1371400	1325800	979760	36	36	189	182	173	103	98	101	Carbamidomethylation; Oxidation (M); Acetylation (Protein N-term)	21276	Apolipoprotein D OS=Homo sapiens OX=9606 GN=APOD PE=1 SV=1
281	95	Q9NS98|SEM3G_HUMAN	800.29	979.8	229.99	102720	117330	81451	28	28	6	8	3	58	63	56	Carbamidomethylation	86701	Semaphorin-3G OS=Homo sapiens OX=9606 GN=SEMA3G PE=2 SV=1
334	156	Q13214|SEM3B_HUMAN	1482	4937.3	2811.3	53732	62073	42433	33	33	13	11	12	47	48	35	Carbamidomethylation	83122	Semaphorin-3B OS=Homo sapiens OX=9606 GN=SEMA3B PE=2 SV=1
198	49	P04075|ALDOA_HUMAN	7856.5	6599.7	3730.4	247700	293690	235030	33	28	14	11	13	88	85	78	Carbamidomethylation	39420	Fructose-bisphosphate aldolase A OS=Homo sapiens OX=9606 GN=ALDOA PE=1 SV=2
203	134	P14625|ENPL_HUMAN	9125.5	12549	7860.6	125650	128130	100030	43	41	30	33	32	63	61	61	Carbamidomethylation	92469	Endoplasmin OS=Homo sapiens OX=9606 GN=HSP90B1 PE=1 SV=1
163	347	P24593|IBP5_HUMAN	37464	37443	27208	377430	396300	271320	32	32	34	38	42	83	88	76	Carbamidomethylation; Oxidation (M)	30570	Insulin-like growth factor-binding protein 5 OS=Homo sapiens OX=9606 GN=IGFBP5 PE=1 SV=1
256	256	Q9H4F8|SMOC1_HUMAN	468.44	915.07	536.93	101950	114720	73587	33	32	13	13	9	58	62	62	Carbamidomethylation; Oxidation (M)	48163	SPARC-related modular calcium-binding protein 1 OS=Homo sapiens OX=9606 GN=SMOC1 PE=1 SV=1
168	810	P81605|DCD_HUMAN	66179	79658	58206	324310	403510	308160	48	48	47	55	53	70	69	54	Carbamidomethylation; Acetylation (Protein N-term)	11284	Dermcidin OS=Homo sapiens OX=9606 GN=DCD PE=1 SV=2
319	118	Q6ZMP0|THSD4_HUMAN	13520	16564	10120	15922	20106	9673.4	29	29	36	32	36	27	29	18	Carbamidomethylation	112450	Thrombospondin type-1 domain-containing protein 4 OS=Homo sapiens OX=9606 GN=THSD4 PE=2 SV=2
165	474	Q9UHG2|PCSK1_HUMAN	514430	606360	453850	7922.7	8174.9	4426.4	30	29	111	119	94	8	10	11		27372	ProSAAS OS=Homo sapiens OX=9606 GN=PCSK1N PE=1 SV=1
271	279	P26572|MGAT1_HUMAN	29428	35189	23219	51181	71509	47396	26	26	30	35	28	40	44	30	Carbamidomethylation	50878	Alpha-1 3-mannosyl-glycoprotein 2-beta-N-acetylglucosaminyltransferase OS=Homo sapiens OX=9606 GN=MGAT1 PE=1 SV=2
269	584	P01033|TIMP1_HUMAN	40487	42872	36215	164820	165070	163200	22	22	23	25	19	48	47	47	Carbamidomethylation	23171	Metalloproteinase inhibitor 1 OS=Homo sapiens OX=9606 GN=TIMP1 PE=1 SV=1
294	221	P04217|A1BG_HUMAN	67863	72368	58677	7962.1	8265.7	6063.5	27	27	54	58	46	12	10	9	Carbamidomethylation; Oxidation (M)	54254	Alpha-1B-glycoprotein OS=Homo sapiens OX=9606 GN=A1BG PE=1 SV=4
221	116	P26038|MOES_HUMAN	200.35	211.97	437.49	77131	77914	55953	45	33	10	10	8	78	83	72	Carbamidomethylation; Oxidation (M)	67820	Moesin OS=Homo sapiens OX=9606 GN=MSN PE=1 SV=3
310	235	P05154|IPSP_HUMAN	1892.1	4157.4	1304	109220	168140	93714	29	29	5	8	9	57	55	46	Carbamidomethylation; Oxidation (M)	45675	Plasma serine protease inhibitor OS=Homo sapiens OX=9606 GN=SERPINA5 PE=1 SV=3
219	179	Q16706|MA2A1_HUMAN	11099	10278	7670.6	42233	42444	34920	47	40	37	32	30	59	54	50	Carbamidomethylation	131140	Alpha-mannosidase 2 OS=Homo sapiens OX=9606 GN=MAN2A1 PE=1 SV=2
195	110	P16870|CBPE_HUMAN	173270	207750	156040	12726	12755	10322	30	30	80	81	88	15	18	13	Carbamidomethylation	53151	Carboxypeptidase E OS=Homo sapiens OX=9606 GN=CPE PE=1 SV=1
370	469	Q9UJJ9|GNPTG_HUMAN	23095	29156	22282	134600	156540	124750	17	17	19	20	14	28	30	30	Carbamidomethylation; Acetylation (Protein N-term)	33974	N-acetylglucosamine-1-phosphotransferase subunit gamma OS=Homo sapiens OX=9606 GN=GNPTG PE=1 SV=1
265	37	P00558|PGK1_HUMAN	0	213.37	275.15	157910	164180	133410	27	27	2	2	4	70	67	65	Carbamidomethylation; Oxidation (M)	44615	Phosphoglycerate kinase 1 OS=Homo sapiens OX=9606 GN=PGK1 PE=1 SV=3
333	268	O14514|AGRB1_HUMAN	5704	8984.7	4027.6	63086	76048	66862	23	23	20	20	19	29	42	36	Carbamidomethylation	173500	Adhesion G protein-coupled receptor B1 OS=Homo sapiens OX=9606 GN=ADGRB1 PE=1 SV=2
136	35	P08779|K1C16_HUMAN	968.21	475.23	605.27	13251	18420	11079	46	17	60	66	54	94	85	90	Carbamidomethylation; Oxidation (M)	51268	Keratin type I cytoskeletal 16 OS=Homo sapiens OX=9606 GN=KRT16 PE=1 SV=4
288	184	Q9H4D0|CSTN2_HUMAN	1990.3	4225.8	674.17	79420	79251	64432	35	34	8	8	6	59	62	48	Carbamidomethylation; Acetylation (Protein N-term)	107006	Calsyntenin-2 OS=Homo sapiens OX=9606 GN=CLSTN2 PE=1 SV=2
179	123	O15394|NCAM2_HUMAN	56643	69641	50294	105220	118900	88185	34	34	55	60	53	47	55	57	Carbamidomethylation	93046	Neural cell adhesion molecule 2 OS=Homo sapiens OX=9606 GN=NCAM2 PE=1 SV=2
260	266	Q9BZR6|RTN4R_HUMAN	2367.6	4124	194.55	138500	134010	115940	29	28	7	13	6	65	62	63	Carbamidomethylation	50708	Reticulon-4 receptor OS=Homo sapiens OX=9606 GN=RTN4R PE=1 SV=1
148	106	P00738|HPT_HUMAN	96504	113320	74582	98735	98809	108730	30	13	74	83	70	63	63	55	Carbamidomethylation; Oxidation (M)	45205	Haptoglobin OS=Homo sapiens OX=9606 GN=HP PE=1 SV=1
344	185	Q9UMF0|ICAM5_HUMAN	2284.1	2417.4	1888.2	58322	61636	48544	27	26	14	9	9	41	49	35	Carbamidomethylation	97116	Intercellular adhesion molecule 5 OS=Homo sapiens OX=9606 GN=ICAM5 PE=1 SV=3
171	603	Q99969|RARR2_HUMAN	98724	107650	78819	539710	504770	468060	23	23	36	41	30	85	82	73	Carbamidomethylation	18618	Retinoic acid receptor responder protein 2 OS=Homo sapiens OX=9606 GN=RARRES2 PE=1 SV=1
170	490	P22692|IBP4_HUMAN	22276	28843	14130	385840	445790	304580	27	27	27	37	26	82	95	80	Carbamidomethylation; Oxidation (M)	27934	Insulin-like growth factor-binding protein 4 OS=Homo sapiens OX=9606 GN=IGFBP4 PE=1 SV=2
383	171	P21333|FLNA_HUMAN	0	0		30009	22374	24049	42	42	2	3	0	43	40	46	Carbamidomethylation	280737	Filamin-A OS=Homo sapiens OX=9606 GN=FLNA PE=1 SV=4
363	20	P30101|PDIA3_HUMAN	809.28	1208.8	127.33	62731	75385	55504	27	27	3	8	3	45	44	43	Carbamidomethylation	56782	Protein disulfide-isomerase A3 OS=Homo sapiens OX=9606 GN=PDIA3 PE=1 SV=4
353	98	Q86SR1|GLT10_HUMAN		0		45451	54484	35775	33	32	0	2	0	50	51	48	Carbamidomethylation	68992	Polypeptide N-acetylgalactosaminyltransferase 10 OS=Homo sapiens OX=9606 GN=GALNT10 PE=1 SV=2
322	163	Q14C87|T132D_HUMAN	291.97	926.46	339.55	42622	44891	38121	32	31	3	4	2	56	56	54	Carbamidomethylation	122309	Transmembrane protein 132D OS=Homo sapiens OX=9606 GN=TMEM132D PE=1 SV=1
338	145	Q8NCL4|GALT6_HUMAN	4624.9	4488.5	2053	45894	44729	37212	27	27	15	16	15	39	41	36	Carbamidomethylation	71159	Polypeptide N-acetylgalactosaminyltransferase 6 OS=Homo sapiens OX=9606 GN=GALNT6 PE=2 SV=2
304	222	Q9NR34|MA1C1_HUMAN	25728	23450	15618	38762	40743	35509	29	28	29	28	29	34	31	32	Carbamidomethylation	70911	Mannosyl-oligosaccharide 1 2-alpha-mannosidase IC OS=Homo sapiens OX=9606 GN=MAN1C1 PE=1 SV=1
160	639	P02746|C1QB_HUMAN	30858	39616	28819	405040	450960	399120	20	20	22	29	21	93	110	97	Carbamidomethylation; Oxidation (M)	26722	Complement C1q subcomponent subunit B OS=Homo sapiens OX=9606 GN=C1QB PE=1 SV=3
229	265	P51888|PRELP_HUMAN	29347	39111	25852	139430	149630	102960	29	29	31	31	28	53	59	48	Carbamidomethylation; Oxidation (M)	43810	Prolargin OS=Homo sapiens OX=9606 GN=PRELP PE=1 SV=1
287	136	Q8N475|FSTL5_HUMAN	1764.6	3720	2314.5	54459	61520	38797	33	31	19	19	21	45	43	45	Carbamidomethylation	95751	Follistatin-related protein 5 OS=Homo sapiens OX=9606 GN=FSTL5 PE=2 SV=2
340	211	Q9UNW1|MINP1_HUMAN	3914.3	13531	3498.9	59996	64724	55249	28	28	17	14	12	41	39	38	Carbamidomethylation	55051	Multiple inositol polyphosphate phosphatase 1 OS=Homo sapiens OX=9606 GN=MINPP1 PE=1 SV=1
327	232	P01871|IGHM_HUMAN	98.024	0	0	22614	21196	18029	28	5	16	10	10	47	41	48	Carbamidomethylation; Oxidation (M)	49440	Immunoglobulin heavy constant mu OS=Homo sapiens OX=9606 GN=IGHM PE=1 SV=4
250	278	P00742|FA10_HUMAN	13786	19685	12851	101940	110720	78776	27	27	27	29	22	49	49	48	Carbamidomethylation; Oxidation (M)	54732	Coagulation factor X OS=Homo sapiens OX=9606 GN=F10 PE=1 SV=2
318	308	P42785|PCP_HUMAN	9120.5	11133	6431.6	73639	80325	69759	19	19	19	18	13	42	46	41	Carbamidomethylation; Oxidation (M)	55800	Lysosomal Pro-X carboxypeptidase OS=Homo sapiens OX=9606 GN=PRCP PE=1 SV=1
360	217	Q08380|LG3BP_HUMAN	52017	53527	45034	1440	2423.1	0	23	23	47	47	43	6	5	1	Carbamidomethylation	65331	Galectin-3-binding protein OS=Homo sapiens OX=9606 GN=LGALS3BP PE=1 SV=1
290	190	P43146|DCC_HUMAN	143.04	969.62	122.86	56849	66769	53402	32	32	1	6	1	57	58	67	Carbamidomethylation	158456	Netrin receptor DCC OS=Homo sapiens OX=9606 GN=DCC PE=1 SV=2
246	289	Q92520|FAM3C_HUMAN	224630	220020	185880	20216	23456	20475	22	22	62	62	61	13	15	15	Carbamidomethylation; Oxidation (M)	24680	Protein FAM3C OS=Homo sapiens OX=9606 GN=FAM3C PE=1 SV=1
364	193	A1L4H1|SRCRL_HUMAN	1667.4	1744.3	634.55	36839	40039	31694	26	26	13	18	13	36	35	29	Carbamidomethylation	165742	Soluble scavenger receptor cysteine-rich domain-containing protein SSC5D OS=Homo sapiens OX=9606 GN=SSC5D PE=1 SV=3
92	460	P05452|TETN_HUMAN	188260	280210	180800	1854700	1865500	1595700	24	24	44	54	44	178	181	172	Carbamidomethylation; Oxidation (M)	22537	Tetranectin OS=Homo sapiens OX=9606 GN=CLEC3B PE=1 SV=3
264	302	Q9NX62|IMPA3_HUMAN	29551	22438	24661	53476	62830	46333	24	24	33	32	29	42	41	34	Carbamidomethylation; Oxidation (M)	38681	Inositol monophosphatase 3 OS=Homo sapiens OX=9606 GN=IMPAD1 PE=1 SV=1
296	188	Q9BYH1|SE6L1_HUMAN	21405	23868	14834	36234	42130	28562	25	24	23	34	25	34	32	40	Carbamidomethylation; Oxidation (M)	111782	Seizure 6-like protein OS=Homo sapiens OX=9606 GN=SEZ6L PE=1 SV=1
235	367	Q9HDB5|NRX3B_HUMAN	115.07	98.93	0	15767	12563	11115	24	5	24	23	14	60	53	59	Oxidation (M)	69305	Neurexin-3-beta OS=Homo sapiens OX=9606 GN=NRXN3 PE=1 SV=4
291	741	P01619|KV320_HUMAN	18013	26716	16041	302930	331990	446740	24	11	16	11	13	39	54	57	Carbamidomethylation; Acetylation (Protein N-term)	12557	Immunoglobulin kappa variable 3-20 OS=Homo sapiens OX=9606 GN=IGKV3-20 PE=1 SV=2
297	351	P09668|CATH_HUMAN	16227	20178	13464	130770	130250	97495	20	20	24	19	21	42	39	43	Carbamidomethylation; Oxidation (M)	37394	Pro-cathepsin H OS=Homo sapiens OX=9606 GN=CTSH PE=1 SV=4
249	316	Q12841|FSTL1_HUMAN	26025	29195	20795	143010	159530	103860	22	22	21	27	32	49	57	39	Carbamidomethylation; Oxidation (M)	34986	Follistatin-related protein 1 OS=Homo sapiens OX=9606 GN=FSTL1 PE=1 SV=1
307	194	P05023|AT1A1_HUMAN	3357.9	5710.6	3718.8	3519	3936.6	3128.2	33	19	35	42	35	23	24	22	Carbamidomethylation	112896	Sodium/potassium-transporting ATPase subunit alpha-1 OS=Homo sapiens OX=9606 GN=ATP1A1 PE=1 SV=1
218	633	P61626|LYSC_HUMAN	13068	14394	9299.3	528780	532170	404820	22	22	20	19	16	67	72	70	Carbamidomethylation; Oxidation (M)	16537	Lysozyme C OS=Homo sapiens OX=9606 GN=LYZ PE=1 SV=1
240	430	P36980|FHR2_HUMAN	942.75	911.17	1223.3	38240	44494	42666	21	6	28	15	22	51	54	61	Carbamidomethylation	30651	Complement factor H-related protein 2 OS=Homo sapiens OX=9606 GN=CFHR2 PE=1 SV=1
224	636	P08294|SODE_HUMAN	34762	48942	34481	121970	109440	103360	17	17	40	38	38	42	43	54	Carbamidomethylation	25851	Extracellular superoxide dismutase [Cu-Zn] OS=Homo sapiens OX=9606 GN=SOD3 PE=1 SV=2
389	214	Q8IZP7|H6ST3_HUMAN	493.79	943.56	0	50393	51437	32967	31	27	5	8	3	35	47	34	Carbamidomethylation; Oxidation (M)	54844	Heparan-sulfate 6-O-sulfotransferase 3 OS=Homo sapiens OX=9606 GN=HS6ST3 PE=2 SV=3
399	201	O95965|ITGBL_HUMAN	0			53335	51573	39454	22	22	2	0	0	39	46	38	Carbamidomethylation; Acetylation (Protein N-term)	53921	Integrin beta-like protein 1 OS=Homo sapiens OX=9606 GN=ITGBL1 PE=2 SV=1
489	198	Q96RW7|HMCN1_HUMAN				10758	18800	7642.6	39	39	0	0	0	28	35	26	Carbamidomethylation	613396	Hemicentin-1 OS=Homo sapiens OX=9606 GN=HMCN1 PE=1 SV=2
315	274	P02461|CO3A1_HUMAN	4840.7	6363.1	5058.3	118550	115860	85982	20	20	15	17	16	47	45	38	Carbamidomethylation; Oxidation (M)	138564	Collagen alpha-1(III) chain OS=Homo sapiens OX=9606 GN=COL3A1 PE=1 SV=4
309	144	Q9BQ16|TICN3_HUMAN	3681.4	7880.8	4205.7	77689	79407	59424	31	30	19	17	16	46	45	37	Carbamidomethylation	49429	Testican-3 OS=Homo sapiens OX=9606 GN=SPOCK3 PE=1 SV=2
253	840	P01615|KVD28_HUMAN				35913	26144	24206	25	5	4	5	6	71	75	58	Carbamidomethylation; Oxidation (M); Acetylation (Protein N-term)	12957	Immunoglobulin kappa variable 2D-28 OS=Homo sapiens OX=9606 GN=IGKV2D-28 PE=1 SV=2
253	841	A0A075B6P5|KV228_HUMAN				35913	26144	24206	25	5	4	5	6	71	75	58	Carbamidomethylation; Oxidation (M); Acetylation (Protein N-term)	12957	Immunoglobulin kappa variable 2-28 OS=Homo sapiens OX=9606 GN=IGKV2-28 PE=3 SV=1
409	101	Q96KG7|MEG10_HUMAN	17203	12827	7112		0		20	20	46	37	35	0	2	0	Carbamidomethylation	122205	Multiple epidermal growth factor-like domains protein 10 OS=Homo sapiens OX=9606 GN=MEGF10 PE=1 SV=1
241	112	Q08431|MFGM_HUMAN	18704	22740	15530	69794	78418	68438	25	25	25	36	23	44	54	48	Carbamidomethylation	43105	Lactadherin OS=Homo sapiens OX=9606 GN=MFGE8 PE=1 SV=3
293	321	P07858|CATB_HUMAN	45761	52421	41840	84361	87533	60861	22	22	26	27	23	38	44	31	Carbamidomethylation; Oxidation (M)	37822	Cathepsin B OS=Homo sapiens OX=9606 GN=CTSB PE=1 SV=3
419	102	Q02809|PLOD1_HUMAN	0	0	0	31488	36571	23917	28	28	1	1	1	35	35	40	Carbamidomethylation	83550	Procollagen-lysine 2-oxoglutarate 5-dioxygenase 1 OS=Homo sapiens OX=9606 GN=PLOD1 PE=1 SV=2
298	427	Q8N126|CADM3_HUMAN	47150	55367	39365	4246.9	7950.2	5908.5	22	22	61	57	47	7	5	9	Carbamidomethylation; Oxidation (M)	43300	Cell adhesion molecule 3 OS=Homo sapiens OX=9606 GN=CADM3 PE=1 SV=1
366	383	O14791|APOL1_HUMAN	3300.3	2840	2938.1	86906	96897	67142	19	19	11	10	8	42	35	37	Oxidation (M)	43974	Apolipoprotein L1 OS=Homo sapiens OX=9606 GN=APOL1 PE=1 SV=5
371	125	Q15063|POSTN_HUMAN	3239.6	1856.4	475.11	25560	22489	10642	31	31	15	24	10	33	32	26	Carbamidomethylation	93314	Periostin OS=Homo sapiens OX=9606 GN=POSTN PE=1 SV=2
324	292	O75787|RENR_HUMAN	76538	80560	65739	16544	21197	19484	23	23	43	44	41	14	15	18	Oxidation (M)	39008	Renin receptor OS=Homo sapiens OX=9606 GN=ATP6AP2 PE=1 SV=2
274	792	Q9NQX5|NPDC1_HUMAN	30226	31159	22977	266620	266260	237840	17	17	20	20	19	55	48	42	Carbamidomethylation; Oxidation (M); Acetylation (Protein N-term)	34516	Neural proliferation differentiation and control protein 1 OS=Homo sapiens OX=9606 GN=NPDC1 PE=1 SV=2
388	191	Q99715|COCA1_HUMAN	0	102.46		24192	26038	15444	41	40	2	4	0	41	44	41	Carbamidomethylation	333147	Collagen alpha-1(XII) chain OS=Homo sapiens OX=9606 GN=COL12A1 PE=1 SV=2
268	180	Q8N436|CPXM2_HUMAN	5759.8	8802.1	6086.8	31640	34765	23301	32	31	28	31	32	38	41	39	Carbamidomethylation	85870	Inactive carboxypeptidase-like protein X2 OS=Homo sapiens OX=9606 GN=CPXM2 PE=2 SV=3
326	1147	P06310|KV230_HUMAN	2233.9	1373.5	1388.2	95453	87339	97574	21	9	6	8	9	51	54	45	Carbamidomethylation	13185	Immunoglobulin kappa variable 2-30 OS=Homo sapiens OX=9606 GN=IGKV2-30 PE=3 SV=2
350	270	P0DOX6|IGM_HUMAN				0	0	0	25	1	14	9	8	41	36	44	Carbamidomethylation; Oxidation (M)	63486	Immunoglobulin mu heavy chain OS=Homo sapiens OX=9606 PE=1 SV=2
561	260	P09622|DLDH_HUMAN				35749	38479	30048	18	18	0	0	0	23	25	25	Carbamidomethylation	54177	Dihydrolipoyl dehydrogenase mitochondrial OS=Homo sapiens OX=9606 GN=DLD PE=1 SV=2
209	242	Q04695|K1C17_HUMAN	447.99	406.51	231.08	1737.3	1502.7	1403.6	35	9	43	40	39	62	46	42	Carbamidomethylation; Oxidation (M)	48106	Keratin type I cytoskeletal 17 OS=Homo sapiens OX=9606 GN=KRT17 PE=1 SV=2
476	389	Q92820|GGH_HUMAN	0	0		64667	65887	55577	18	18	1	1	0	32	31	30	Oxidation (M)	35964	Gamma-glutamyl hydrolase OS=Homo sapiens OX=9606 GN=GGH PE=1 SV=2
392	311	Q96B86|RGMA_HUMAN	11442	11056	9585	69093	64236	65453	19	19	16	15	12	29	27	32	Carbamidomethylation	49347	Repulsive guidance molecule A OS=Homo sapiens OX=9606 GN=RGMA PE=1 SV=3
381	339	P15502|ELN_HUMAN	19833	24052	19196	20528	24832	14026	20	20	29	21	22	24	23	17	Carbamidomethylation	68397	Elastin OS=Homo sapiens OX=9606 GN=ELN PE=1 SV=4
286	131	Q02818|NUCB1_HUMAN	49922	60082	35058	6222.7	7164.9	2640	30	29	58	52	46	13	16	7	Oxidation (M)	53879	Nucleobindin-1 OS=Homo sapiens OX=9606 GN=NUCB1 PE=1 SV=4
432	135	Q9NS15|LTBP3_HUMAN	238.74	551.38	0	16775	19914	10789	26	25	7	5	2	31	29	32	Carbamidomethylation	139359	Latent-transforming growth factor beta-binding protein 3 OS=Homo sapiens OX=9606 GN=LTBP3 PE=1 SV=4
502	187	Q7Z7M0|MEGF8_HUMAN	4092.4	5671.2	3146.5		110.09		29	29	26	31	28	0	1	0	Carbamidomethylation	303100	Multiple epidermal growth factor-like domains protein 8 OS=Homo sapiens OX=9606 GN=MEGF8 PE=1 SV=2
272	205	P08670|VIME_HUMAN	23198	30546	18616	10201	12182	5169	38	31	51	45	47	23	23	17	Carbamidomethylation	53652	Vimentin OS=Homo sapiens OX=9606 GN=VIM PE=1 SV=4
391	233	Q99574|NEUS_HUMAN	51662	55633	38491	302	268.73	0	23	23	42	43	39	3	3	1	Oxidation (M)	46427	Neuroserpin OS=Homo sapiens OX=9606 GN=SERPINI1 PE=1 SV=1
425	413	P04180|LCAT_HUMAN	53587	55621	44608				20	20	38	33	39	0	0	0	Carbamidomethylation; Oxidation (M)	49578	Phosphatidylcholine-sterol acyltransferase OS=Homo sapiens OX=9606 GN=LCAT PE=1 SV=1
481	176	Q9NZ08|ERAP1_HUMAN				24563	26987	19290	27	27	0	0	0	38	24	31	Carbamidomethylation	107235	Endoplasmic reticulum aminopeptidase 1 OS=Homo sapiens OX=9606 GN=ERAP1 PE=1 SV=3
222	595	P17900|SAP3_HUMAN	332730	348770	254910	4830.5	1693.8	2769.5	22	22	79	83	72	6	7	10	Carbamidomethylation; Oxidation (M)	20838	Ganglioside GM2 activator OS=Homo sapiens OX=9606 GN=GM2A PE=1 SV=4
429	105	P07996|TSP1_HUMAN		0		16931	16104	13733	26	21	3	3	1	37	33	30	Carbamidomethylation	129383	Thrombospondin-1 OS=Homo sapiens OX=9606 GN=THBS1 PE=1 SV=2
313	227	Q969P0|IGSF8_HUMAN	57851	60650	48295	20314	18981	17492	24	24	40	50	39	14	17	20	Carbamidomethylation; Oxidation (M)	65034	Immunoglobulin superfamily member 8 OS=Homo sapiens OX=9606 GN=IGSF8 PE=1 SV=1
458	225	Q86Y38|XYLT1_HUMAN				29787	34643	21433	29	29	0	0	0	33	40	27	Carbamidomethylation	107569	Xylosyltransferase 1 OS=Homo sapiens OX=9606 GN=XYLT1 PE=1 SV=1
258	304	P08174|DAF_HUMAN	1536.6	3692.3	643.76	170870	186070	162810	21	21	10	13	12	52	63	66	Carbamidomethylation; Oxidation (M); Acetylation (Protein N-term)	41400	Complement decay-accelerating factor OS=Homo sapiens OX=9606 GN=CD55 PE=1 SV=4
192	298	P0DOX2|IGA2_HUMAN	792.63	1301.3	647.14	7370.7	7747.1	14642	32	8	37	51	40	55	59	56	Carbamidomethylation	48934	Immunoglobulin alpha-2 heavy chain OS=Homo sapiens OX=9606 PE=1 SV=2
270	373	Q6NW40|RGMB_HUMAN	25253	31704	22920	52131	57495	45153	15	15	33	31	34	40	35	34	Carbamidomethylation	47547	RGM domain family member B OS=Homo sapiens OX=9606 GN=RGMB PE=1 SV=3
164	794	P02745|C1QA_HUMAN	16148	23929	16509	462260	400680	386590	21	21	16	16	17	86	109	111	Carbamidomethylation; Oxidation (M); Acetylation (Protein N-term)	26017	Complement C1q subcomponent subunit A OS=Homo sapiens OX=9606 GN=C1QA PE=1 SV=2
368	115	P26927|HGFL_HUMAN	0	0		51452	112870	52044	39	39	1	2	0	43	48	48	Carbamidomethylation	80320	Hepatocyte growth factor-like protein OS=Homo sapiens OX=9606 GN=MST1 PE=1 SV=2
463	259	Q6UWP8|SBSN_HUMAN	417.14	325.24	179.02	8996	11206	5836.4	19	19	11	12	5	21	27	22		60541	Suprabasin OS=Homo sapiens OX=9606 GN=SBSN PE=1 SV=2
394	408	Q92563|TICN2_HUMAN	17986	16788	13342	40989	43271	34942	16	16	20	18	22	25	21	22	Carbamidomethylation; Oxidation (M)	46779	Testican-2 OS=Homo sapiens OX=9606 GN=SPOCK2 PE=1 SV=1
411	216	P43652|AFAM_HUMAN	24302	20488	14547	391.24	0		31	31	39	39	38	1	1	0	Carbamidomethylation	69069	Afamin OS=Homo sapiens OX=9606 GN=AFM PE=1 SV=1
554	295	P54764|EPHA4_HUMAN	22837	30298	18647			81.086	16	15	23	30	17	0	2	1	Carbamidomethylation	109860	Ephrin type-A receptor 4 OS=Homo sapiens OX=9606 GN=EPHA4 PE=1 SV=1
503	237	P50395|GDIB_HUMAN	0	145.08	0	16560	18027	12790	18	13	2	2	2	26	22	32	Carbamidomethylation	50663	Rab GDP dissociation inhibitor beta OS=Homo sapiens OX=9606 GN=GDI2 PE=1 SV=2
302	417	P23284|PPIB_HUMAN	1571.3	2037.9	1116	295150	329170	248080	22	22	5	6	7	50	59	57	Carbamidomethylation; Oxidation (M)	23743	Peptidyl-prolyl cis-trans isomerase B OS=Homo sapiens OX=9606 GN=PPIB PE=1 SV=2
482	258	P09972|ALDOC_HUMAN	0		5540.3	15187	21434	51970	24	18	2	1	3	26	29	32	Carbamidomethylation	39456	Fructose-bisphosphate aldolase C OS=Homo sapiens OX=9606 GN=ALDOC PE=1 SV=2
283	554	P02753|RET4_HUMAN	208640	194590	176490	1121.5	1317.8	687.12	16	16	63	55	65	4	5	1	Carbamidomethylation; Oxidation (M)	23010	Retinol-binding protein 4 OS=Homo sapiens OX=9606 GN=RBP4 PE=1 SV=3
317	290	Q8NES3|LFNG_HUMAN	1310.1	2778.2	1721	80735	83121	71410	24	22	10	14	10	50	50	45	Carbamidomethylation; Oxidation (M)	41773	Beta-1 3-N-acetylglucosaminyltransferase lunatic fringe OS=Homo sapiens OX=9606 GN=LFNG PE=1 SV=2
234	543	P34096|RNAS4_HUMAN	19002	21287	14545	226380	248330	225100	21	21	21	16	18	63	61	55	Carbamidomethylation; Oxidation (M)	16840	Ribonuclease 4 OS=Homo sapiens OX=9606 GN=RNASE4 PE=1 SV=3
306	210	Q9UBX1|CATF_HUMAN	14829	16332	9723.2	77323	71125	60801	29	29	23	27	23	37	34	38	Carbamidomethylation	53366	Cathepsin F OS=Homo sapiens OX=9606 GN=CTSF PE=1 SV=1
446	170	Q9UM47|NOTC3_HUMAN	0		190.53	38139	33897	18791	29	29	2	0	1	39	34	26	Carbamidomethylation; Acetylation (Protein N-term)	243629	Neurogenic locus notch homolog protein 3 OS=Homo sapiens OX=9606 GN=NOTCH3 PE=1 SV=2
267	587	P03950|ANGI_HUMAN	2527.5	2527.9	1644.8	203910	211820	144960	21	21	7	8	7	65	58	65	Carbamidomethylation; Oxidation (M)	16550	Angiogenin OS=Homo sapiens OX=9606 GN=ANG PE=1 SV=1
438	219	P12110|CO6A2_HUMAN	633.74	520.27	347.67	31658	31593	25256	24	24	6	5	7	24	32	30	Carbamidomethylation	108579	Collagen alpha-2(VI) chain OS=Homo sapiens OX=9606 GN=COL6A2 PE=1 SV=4
456	293	Q9P0K1|ADA22_HUMAN	26583	27563	19869	5320.4	6179.5	5177.4	17	17	25	21	17	10	15	12	Carbamidomethylation; Oxidation (M); Acetylation (Protein N-term)	100433	Disintegrin and metalloproteinase domain-containing protein 22 OS=Homo sapiens OX=9606 GN=ADAM22 PE=1 SV=1
299	340	Q13449|LSAMP_HUMAN	39472	45560	31728	78326	80813	55773	18	18	31	31	26	37	31	30	Carbamidomethylation	37394	Limbic system-associated membrane protein OS=Homo sapiens OX=9606 GN=LSAMP PE=1 SV=2
337	391	P18428|LBP_HUMAN	40213	37953	30422	56232	63138	44036	17	17	27	25	21	30	34	27	Carbamidomethylation; Oxidation (M)	53384	Lipopolysaccharide-binding protein OS=Homo sapiens OX=9606 GN=LBP PE=1 SV=3
252	592	P21246|PTN_HUMAN	6302	7895.2	2513.3	232150	234780	211300	20	20	15	14	11	55	67	57	Carbamidomethylation	18942	Pleiotrophin OS=Homo sapiens OX=9606 GN=PTN PE=1 SV=1
320	442	P07585|PGS2_HUMAN	27055	30976	28785	56203	56895	50180	19	18	23	32	28	32	33	30	Carbamidomethylation	39747	Decorin OS=Homo sapiens OX=9606 GN=DCN PE=1 SV=1
359	528	P09486|SPRC_HUMAN	52251	75951	48139	19912	16714	13475	18	18	39	29	39	14	12	16	Carbamidomethylation; Oxidation (M)	34632	SPARC OS=Homo sapiens OX=9606 GN=SPARC PE=1 SV=1
231	546	P01344|IGF2_HUMAN	104190	112370	89545	428680	517570	488320	16	16	30	25	24	55	55	50	Carbamidomethylation	20140	Insulin-like growth factor II OS=Homo sapiens OX=9606 GN=IGF2 PE=1 SV=1
384	241	Q02413|DSG1_HUMAN	5973.5	6698.3	5001.7	15180	16979	12297	21	21	14	15	14	29	34	28	Carbamidomethylation; Oxidation (M)	113748	Desmoglein-1 OS=Homo sapiens OX=9606 GN=DSG1 PE=1 SV=2
422	246	P35052|GPC1_HUMAN	2725.5	3172.2	1601.6	42928	43539	37001	22	22	10	11	9	25	27	29	Carbamidomethylation	61680	Glypican-1 OS=Homo sapiens OX=9606 GN=GPC1 PE=1 SV=2
524	291	Q6P9A2|GLT18_HUMAN	451.31	0	0	29315	31637	22010	20	20	1	3	1	24	27	24	Carbamidomethylation	69561	Polypeptide N-acetylgalactosaminyltransferase 18 OS=Homo sapiens OX=9606 GN=GALNT18 PE=2 SV=2
464	195	Q9HCK4|ROBO2_HUMAN	0	0	0	17277	19801	15673	25	23	1	2	2	28	36	28	Carbamidomethylation	151199	Roundabout homolog 2 OS=Homo sapiens OX=9606 GN=ROBO2 PE=1 SV=2
471	223	P08572|CO4A2_HUMAN	0	185.38	79.958	32275	40566	20278	21	21	3	3	5	25	32	27	Carbamidomethylation; Oxidation (M)	167553	Collagen alpha-2(IV) chain OS=Homo sapiens OX=9606 GN=COL4A2 PE=1 SV=4
124	977	A0M8Q6|IGLC7_HUMAN				2707.9	3150.4	1779.5	21	1	47	33	45	110	134	133		11254	Immunoglobulin lambda constant 7 OS=Homo sapiens OX=9606 GN=IGLC7 PE=1 SV=3
565	167	Q9UP79|ATS8_HUMAN	824.45	1435.6	892.11	8476.3	7830.8	5963.3	22	22	6	4	3	18	22	19	Carbamidomethylation	96460	A disintegrin and metalloproteinase with thrombospondin motifs 8 OS=Homo sapiens OX=9606 GN=ADAMTS8 PE=2 SV=2
365	571	P01210|PENK_HUMAN	82503	90922	75920		0		18	18	41	45	55	0	2	0	Carbamidomethylation; Oxidation (M)	30787	Proenkephalin-A OS=Homo sapiens OX=9606 GN=PENK PE=1 SV=1
406	199	Q9Y6R7|FCGBP_HUMAN	7541.1	8916.6	3808.1		0	0	27	27	41	45	34	0	1	1	Carbamidomethylation	572021	IgGFc-binding protein OS=Homo sapiens OX=9606 GN=FCGBP PE=1 SV=3
397	294	Q16849|PTPRN_HUMAN	25817	28371	17157	6064.6	6761.7	7922.7	25	25	31	34	30	9	12	11		105847	Receptor-type tyrosine-protein phosphatase-like N OS=Homo sapiens OX=9606 GN=PTPRN PE=1 SV=1
284	1153	P01614|KVD40_HUMAN				603.75	1070.2	3973.4	22	2	4	5	6	59	65	54	Carbamidomethylation; Acetylation (Protein N-term)	13310	Immunoglobulin kappa variable 2D-40 OS=Homo sapiens OX=9606 GN=IGKV2D-40 PE=1 SV=2
284	1154	A0A087WW87|KV240_HUMAN				603.75	1070.2	3973.4	22	2	4	5	6	59	65	54	Carbamidomethylation; Acetylation (Protein N-term)	13310	Immunoglobulin kappa variable 2-40 OS=Homo sapiens OX=9606 GN=IGKV2-40 PE=3 SV=2
452	476	P29966|MARCS_HUMAN	2578.6	2978.8	1778	21328	22875	16635	13	13	14	15	10	22	25	15	Carbamidomethylation	31555	Myristoylated alanine-rich C-kinase substrate OS=Homo sapiens OX=9606 GN=MARCKS PE=1 SV=4
244	336	P00739|HPTR_HUMAN	4377.3	5425.6	3788.7			530.07	22	5	46	50	42	32	30	29	Carbamidomethylation	39030	Haptoglobin-related protein OS=Homo sapiens OX=9606 GN=HPR PE=2 SV=2
378	953	A2NJV5|KV229_HUMAN				1608.3	5791.1	4527.4	19	1	4	7	8	38	45	35	Carbamidomethylation; Acetylation (Protein N-term)	13085	Immunoglobulin kappa variable 2-29 OS=Homo sapiens OX=9606 GN=IGKV2-29 PE=3 SV=2
390	553	P80723|BASP1_HUMAN	0	2662.8	1766.6	65412	72289	41939	15	15	2	9	2	37	44	38		22693	Brain acid soluble protein 1 OS=Homo sapiens OX=9606 GN=BASP1 PE=1 SV=2
448	900	A0A0C4DH25|KVD20_HUMAN	902.08	1044.8	751.15	19486	17774	23222	15	2	7	8	7	27	26	27	Acetylation (Protein N-term)	12515	Immunoglobulin kappa variable 3D-20 OS=Homo sapiens OX=9606 GN=IGKV3D-20 PE=3 SV=1
303	248	P40189|IL6RB_HUMAN	9367.2	12194	4566.1	41848	43326	36493	25	25	27	30	24	42	28	32	Carbamidomethylation; Acetylation (Protein N-term)	103537	Interleukin-6 receptor subunit beta OS=Homo sapiens OX=9606 GN=IL6ST PE=1 SV=2
412	480	P09417|DHPR_HUMAN	4127.6	5012.3	3289.2	52737	64164	37669	15	15	16	13	10	25	27	27	Carbamidomethylation; Oxidation (M); Acetylation (Protein N-term)	25790	Dihydropteridine reductase OS=Homo sapiens OX=9606 GN=QDPR PE=1 SV=2
292	498	Q06828|FMOD_HUMAN	47137	61573	37207	20821	25038	20501	16	16	42	38	35	22	25	27	Carbamidomethylation	43179	Fibromodulin OS=Homo sapiens OX=9606 GN=FMOD PE=1 SV=2
490	218	Q5D862|FILA2_HUMAN	3115.8	2673.4	2761	12690	12645	8194.3	21	21	15	13	9	20	15	17	Carbamidomethylation; Acetylation (Protein N-term)	248072	Filaggrin-2 OS=Homo sapiens OX=9606 GN=FLG2 PE=1 SV=1
505	251	Q7Z7G0|TARSH_HUMAN	583.7	364.2	521.58	33401	37112	26419	20	20	2	1	5	23	29	25	Carbamidomethylation	118642	Target of Nesh-SH3 OS=Homo sapiens OX=9606 GN=ABI3BP PE=1 SV=1
646	309	Q9Y5F6|PCDGM_HUMAN	3806.6	6162.3	3725.8				15	13	11	15	15	4	4	5	Carbamidomethylation	101921	Protocadherin gamma-C5 OS=Homo sapiens OX=9606 GN=PCDHGC5 PE=2 SV=1
423	520	O00584|RNT2_HUMAN	878.37	1413.2	306.83	66590	66943	58129	15	15	3	7	1	28	31	40	Carbamidomethylation	29481	Ribonuclease T2 OS=Homo sapiens OX=9606 GN=RNASET2 PE=1 SV=2
523	318	P19835|CEL_HUMAN		0		41207	43465	34582	17	17	0	1	0	26	26	28	Carbamidomethylation	79322	Bile salt-activated lipase OS=Homo sapiens OX=9606 GN=CEL PE=1 SV=3
188	827	A0A075B6S5|KV127_HUMAN				2332.1	1338.7	1671.7	24	5	6	10	6	74	98	107	Carbamidomethylation; Oxidation (M); Acetylation (Protein N-term)	12712	Immunoglobulin kappa variable 1-27 OS=Homo sapiens OX=9606 GN=IGKV1-27 PE=3 SV=1
414	299	P07093|GDN_HUMAN	5297.5	5824.5	3591	33113	35002	24348	17	16	13	14	17	25	27	20	Carbamidomethylation	44002	Glia-derived nexin OS=Homo sapiens OX=9606 GN=SERPINE2 PE=1 SV=1
443	357	Q9Y2I2|NTNG1_HUMAN	248.91	0	0	24811	27311	21797	17	17	6	8	4	29	29	27	Carbamidomethylation; Oxidation (M)	60541	Netrin-G1 OS=Homo sapiens OX=9606 GN=NTNG1 PE=1 SV=3
585	252	Q6UXH9|PAMR1_HUMAN	0	561.76	0	15619	13474	11228	20	19	1	2	2	25	19	19	Carbamidomethylation	80199	Inactive serine protease PAMR1 OS=Homo sapiens OX=9606 GN=PAMR1 PE=1 SV=1
279	724	P61769|B2MG_HUMAN	568090	543880	407730	5252.7	8743.5	3074.4	19	19	59	64	59	6	7	5	Carbamidomethylation	13715	Beta-2-microglobulin OS=Homo sapiens OX=9606 GN=B2M PE=1 SV=1
437	540	P22061|PIMT_HUMAN	12312	13831	11812	9393	9342.6	4434.4	15	15	24	24	19	14	12	12	Carbamidomethylation	24636	Protein-L-isoaspartate(D-aspartate) O-methyltransferase OS=Homo sapiens OX=9606 GN=PCMT1 PE=1 SV=4
410	458	P58400|NRX1B_HUMAN					270.24		16	1	9	9	9	33	32	26	Oxidation (M)	50424	Neurexin-1-beta OS=Homo sapiens OX=9606 GN=NRXN1 PE=1 SV=3
500	363	Q9UBX5|FBLN5_HUMAN	26667	31351	22498				22	22	31	32	24	0	0	0	Carbamidomethylation	50181	Fibulin-5 OS=Homo sapiens OX=9606 GN=FBLN5 PE=1 SV=1
459	275	O14786|NRP1_HUMAN	0	495.97	346.36	35932	38682	29654	20	18	2	3	3	31	36	24	Carbamidomethylation	103134	Neuropilin-1 OS=Homo sapiens OX=9606 GN=NRP1 PE=1 SV=3
449	332	P25774|CATS_HUMAN	0	318.08	246.02	76105	55688	46324	17	16	3	4	1	36	28	30	Carbamidomethylation; Oxidation (M); Acetylation (Protein N-term)	37496	Cathepsin S OS=Homo sapiens OX=9606 GN=CTSS PE=1 SV=3
477	206	P0DMV8|HS71A_HUMAN	0	446.62	93.742	8756.6	6593	7027.7	22	12	10	12	9	22	20	21	Carbamidomethylation	70052	Heat shock 70 kDa protein 1A OS=Homo sapiens OX=9606 GN=HSPA1A PE=1 SV=1
477	207	P0DMV9|HS71B_HUMAN	0	446.62	93.742	8756.6	6593	7027.7	22	12	10	12	9	22	20	21	Carbamidomethylation	70052	Heat shock 70 kDa protein 1B OS=Homo sapiens OX=9606 GN=HSPA1B PE=1 SV=1
582	240	Q9UKM7|MA1B1_HUMAN				17828	20311	11465	20	20	0	0	0	27	24	18		79580	Endoplasmic reticulum mannosyl-oligosaccharide 1 2-alpha-mannosidase OS=Homo sapiens OX=9606 GN=MAN1B1 PE=1 SV=2
428	297	P23471|PTPRZ_HUMAN	54790	68254	47867	3550.2	4319.6	1675	17	17	27	40	27	5	4	5	Carbamidomethylation; Oxidation (M)	254585	Receptor-type tyrosine-protein phosphatase zeta OS=Homo sapiens OX=9606 GN=PTPRZ1 PE=1 SV=4
430	445	O75509|TNR21_HUMAN	2231.2	2202.4	2195.5	68061	77726	55013	18	18	9	12	3	25	33	25	Carbamidomethylation	71845	Tumor necrosis factor receptor superfamily member 21 OS=Homo sapiens OX=9606 GN=TNFRSF21 PE=1 SV=1
301	771	P01782|HV309_HUMAN				0			19	1	11	14	10	53	52	45	Carbamidomethylation; Oxidation (M)	12945	Immunoglobulin heavy variable 3-9 OS=Homo sapiens OX=9606 GN=IGHV3-9 PE=1 SV=2
526	215	Q99972|MYOC_HUMAN	481.61	1181.8	0	17508	19228	17032	23	23	6	5	4	21	22	22	Carbamidomethylation	56972	Myocilin OS=Homo sapiens OX=9606 GN=MYOC PE=1 SV=2
509	416	O15335|CHAD_HUMAN				31718	41566	28696	16	16	0	0	0	25	32	28	Carbamidomethylation	40476	Chondroadherin OS=Homo sapiens OX=9606 GN=CHAD PE=1 SV=2
329	393	Q9P121|NTRI_HUMAN	13808	18791	11775	94046	104890	79143	15	11	22	23	21	39	33	32	Carbamidomethylation; Oxidation (M)	37971	Neurotrimin OS=Homo sapiens OX=9606 GN=NTM PE=1 SV=1
450	166	P03951|FA11_HUMAN				16968	14370	13656	25	22	0	0	0	38	28	36	Carbamidomethylation	70109	Coagulation factor XI OS=Homo sapiens OX=9606 GN=F11 PE=1 SV=1
314	255	Q14520|HABP2_HUMAN	13868	19898	12448	37246	43826	28330	19	19	24	27	33	28	35	33	Carbamidomethylation	62672	Hyaluronan-binding protein 2 OS=Homo sapiens OX=9606 GN=HABP2 PE=1 SV=1
323	301	O43493|TGON2_HUMAN	190.73	0		210700	214900	170180	17	17	5	5	0	63	55	47		51019	Trans-Golgi network integral membrane protein 2 OS=Homo sapiens OX=9606 GN=TGOLN2 PE=1 SV=3
403	273	P07355|ANXA2_HUMAN	16586	18714	13710	22309	25484	23010	17	17	18	17	24	22	17	26	Carbamidomethylation; Acetylation (Protein N-term)	38604	Annexin A2 OS=Homo sapiens OX=9606 GN=ANXA2 PE=1 SV=2
436	387	P27169|PON1_HUMAN	9116.6	13614	10208	24064	24076	16528	13	13	20	15	18	15	19	18	Carbamidomethylation	39731	Serum paraoxonase/arylesterase 1 OS=Homo sapiens OX=9606 GN=PON1 PE=1 SV=3
332	314	P02760|AMBP_HUMAN	54694	58594	42724	32031	33970	29922	21	21	37	39	32	21	16	22	Carbamidomethylation; Oxidation (M)	39000	Protein AMBP OS=Homo sapiens OX=9606 GN=AMBP PE=1 SV=1
577	250	Q53EL9|SEZ6_HUMAN	10852	13471	10699				19	19	20	27	23	0	0	0	Carbamidomethylation	107425	Seizure protein 6 homolog OS=Homo sapiens OX=9606 GN=SEZ6 PE=1 SV=2
201	381	P68032|ACTC_HUMAN	19055	24023	16744	46016	40613	40107	18	2	48	47	45	47	49	50	Oxidation (M)	42019	Actin alpha cardiac muscle 1 OS=Homo sapiens OX=9606 GN=ACTC1 PE=1 SV=1
483	269	P13637|AT1A3_HUMAN				3215.2	4242.2	3072.8	18	4	15	19	15	14	15	13	Carbamidomethylation	111748	Sodium/potassium-transporting ATPase subunit alpha-3 OS=Homo sapiens OX=9606 GN=ATP1A3 PE=1 SV=3
398	423	Q6UX73|CP089_HUMAN	12760	14665	8904.3	18486	18904	17927	20	19	23	21	27	18	17	18	Carbamidomethylation	45391	UPF0764 protein C16orf89 OS=Homo sapiens OX=9606 GN=C16orf89 PE=1 SV=2
400	342	Q03167|TGBR3_HUMAN	5151.2	8036.8	5525.3	64200	58000	64444	15	15	16	13	16	28	24	28	Carbamidomethylation	93499	Transforming growth factor beta receptor type 3 OS=Homo sapiens OX=9606 GN=TGFBR3 PE=1 SV=3
506	303	P13796|PLSL_HUMAN	413.14	218.41	0	12728	16025	11126	17	13	8	8	4	19	22	24	Carbamidomethylation	70289	Plastin-2 OS=Homo sapiens OX=9606 GN=LCP1 PE=1 SV=6
602	238	Q7Z553|MDGA2_HUMAN	0		0	21761	23002	15105	19	19	1	0	1	18	19	24	Carbamidomethylation	107436	MAM domain-containing glycosylphosphatidylinositol anchor protein 2 OS=Homo sapiens OX=9606 GN=MDGA2 PE=1 SV=2
372	422	P04070|PROC_HUMAN	6682.1	8235.6	4706.3	49466	49257	37819	19	19	21	19	17	23	33	26	Carbamidomethylation	52071	Vitamin K-dependent protein C OS=Homo sapiens OX=9606 GN=PROC PE=1 SV=1
462	356	Q9BXR6|FHR5_HUMAN	0	434.03	232.75	4899.9	9640.7	5605.4	18	12	6	5	11	23	26	27	Carbamidomethylation	64420	Complement factor H-related protein 5 OS=Homo sapiens OX=9606 GN=CFHR5 PE=1 SV=1
199	811	P01597|KV139_HUMAN				4598.2	2808.2	4749.5	22	1	4	9	5	67	94	108	Carbamidomethylation; Oxidation (M); Acetylation (Protein N-term)	12737	Immunoglobulin kappa variable 1-39 OS=Homo sapiens OX=9606 GN=IGKV1-39 PE=1 SV=2
199	812	P04432|KVD39_HUMAN				4598.2	2808.2	4749.5	22	1	4	9	5	67	94	108	Carbamidomethylation; Oxidation (M); Acetylation (Protein N-term)	12737	Immunoglobulin kappa variable 1D-39 OS=Homo sapiens OX=9606 GN=IGKV1D-39 PE=3 SV=2
379	517	Q86UD1|OAF_HUMAN	23368	30939	18752	79942	83814	74538	13	13	21	22	17	24	25	27	Carbamidomethylation; Oxidation (M)	30688	Out at first protein homolog OS=Homo sapiens OX=9606 GN=OAF PE=2 SV=1
441	271	P50993|AT1A2_HUMAN	0	393.52	0	925.97	414.03	0	19	6	16	25	19	15	15	13	Carbamidomethylation	112265	Sodium/potassium-transporting ATPase subunit alpha-2 OS=Homo sapiens OX=9606 GN=ATP1A2 PE=1 SV=1
442	220	O00339|MATN2_HUMAN		14092	11509	28558	32226	23137	21	21	0	3	3	34	35	28	Carbamidomethylation	106837	Matrilin-2 OS=Homo sapiens OX=9606 GN=MATN2 PE=1 SV=4
556	247	Q13740|CD166_HUMAN	8315.4	15597	12296	0		118.97	19	19	25	29	18	1	0	1	Carbamidomethylation	65102	CD166 antigen OS=Homo sapiens OX=9606 GN=ALCAM PE=1 SV=2
311	558	P01877|IGHA2_HUMAN	0	2025.6			0	0	19	1	32	40	34	26	25	23	Carbamidomethylation	36591	Immunoglobulin heavy constant alpha 2 OS=Homo sapiens OX=9606 GN=IGHA2 PE=1 SV=4
187	836	P01764|HV323_HUMAN						0	19	1	20	23	19	79	83	80	Carbamidomethylation	12582	Immunoglobulin heavy variable 3-23 OS=Homo sapiens OX=9606 GN=IGHV3-23 PE=1 SV=2
259	472	Q92765|SFRP3_HUMAN	46091	56659	46497	115590	126730	118930	19	19	34	37	34	32	45	34	Carbamidomethylation	36254	Secreted frizzled-related protein 3 OS=Homo sapiens OX=9606 GN=FRZB PE=1 SV=2
435	548	P68871|HBB_HUMAN	834.42	1592.9	676.4	73498	79326	61639	13	13	6	10	6	26	24	33	Carbamidomethylation; Oxidation (M)	15998	Hemoglobin subunit beta OS=Homo sapiens OX=9606 GN=HBB PE=1 SV=2
204	607	A0A0B4J1X5|HV374_HUMAN				4822.8	3184.5	3830.7	18	4	18	17	19	74	76	76	Carbamidomethylation	12840	Immunoglobulin heavy variable 3-74 OS=Homo sapiens OX=9606 GN=IGHV3-74 PE=3 SV=1
328	736	P01700|LV147_HUMAN	1619.8	2014.4	3109.7	12120	14149	12300	26	4	6	4	7	53	54	48	Carbamidomethylation	12284	Immunoglobulin lambda variable 1-47 OS=Homo sapiens OX=9606 GN=IGLV1-47 PE=1 SV=2
354	530	Q8TAG5|VTM2A_HUMAN	19678	19085	19783	91312	94758	82176	17	17	16	15	16	35	35	34	Carbamidomethylation	25833	V-set and transmembrane domain-containing protein 2A OS=Homo sapiens OX=9606 GN=VSTM2A PE=1 SV=3
599	518	P49862|KLK7_HUMAN				22559	24876	19279	15	14	0	0	0	22	21	21	Carbamidomethylation; Oxidation (M)	27525	Kallikrein-7 OS=Homo sapiens OX=9606 GN=KLK7 PE=1 SV=1
335	988	P01699|LV144_HUMAN				8276.7	10184	9851.7	25	3	4	2	5	54	53	47	Carbamidomethylation	12201	Immunoglobulin lambda variable 1-44 OS=Homo sapiens OX=9606 GN=IGLV1-44 PE=1 SV=2
478	727	Q93091|RNAS6_HUMAN	360.96	358.18		112950	119320	81803	11	11	1	1	0	35	30	27	Carbamidomethylation	17196	Ribonuclease K6 OS=Homo sapiens OX=9606 GN=RNASE6 PE=1 SV=2
404	428	Q9NZP8|C1RL_HUMAN	1516.1	1526.4	749.75				20	12	19	15	18	27	23	22	Carbamidomethylation	53498	Complement C1r subcomponent-like protein OS=Homo sapiens OX=9606 GN=C1RL PE=1 SV=2
560	276	Q9HAR2|AGRL3_HUMAN	199.4	1044.1	0	13196	13079	8525.6	17	17	7	8	4	28	14	12	Carbamidomethylation	161812	Adhesion G protein-coupled receptor L3 OS=Homo sapiens OX=9606 GN=ADGRL3 PE=1 SV=2
486	712	Q15904|VAS1_HUMAN	85898	111060	81193				10	10	31	30	30	0	0	0	Oxidation (M)	52026	V-type proton ATPase subunit S1 OS=Homo sapiens OX=9606 GN=ATP6AP1 PE=1 SV=2
408	376	Q641Q3|METRL_HUMAN	1163.9	2479.6	743.01	47064	60088	39558	19	19	8	7	6	28	35	37	Carbamidomethylation	34398	Meteorin-like protein OS=Homo sapiens OX=9606 GN=METRNL PE=2 SV=1
595	320	P20908|CO5A1_HUMAN				7497.5	10735	14248	14	14	0	0	0	24	26	14	Carbamidomethylation	183559	Collagen alpha-1(V) chain OS=Homo sapiens OX=9606 GN=COL5A1 PE=1 SV=3
491	447	P48058|GRIA4_HUMAN	12890	14948	10393	10986	9930.3	8628.5	16	16	21	19	18	11	10	10	Carbamidomethylation	100871	Glutamate receptor 4 OS=Homo sapiens OX=9606 GN=GRIA4 PE=1 SV=2
588	254	Q8IXL6|FA20C_HUMAN	268.11	3870.9	325.88	13454	15900	11601	23	23	5	7	2	20	21	13	Carbamidomethylation	66235	Extracellular serine/threonine protein kinase FAM20C OS=Homo sapiens OX=9606 GN=FAM20C PE=1 SV=2
355	574	Q9HCU4|CELR2_HUMAN	13782	15318	10975	103450	107280	94840	15	15	17	20	19	32	29	33	Carbamidomethylation	317453	Cadherin EGF LAG seven-pass G-type receptor 2 OS=Homo sapiens OX=9606 GN=CELSR2 PE=1 SV=1
589	802	Q16674|MIA_HUMAN	466.51	597.28	458.26	64849	66852	58017	10	10	2	2	3	20	20	21	Carbamidomethylation; Oxidation (M)	14509	Melanoma-derived growth regulatory protein OS=Homo sapiens OX=9606 GN=MIA PE=1 SV=1
654	285	Q86TH1|ATL2_HUMAN				18297	18070	12398	17	17	0	0	0	20	15	18	Carbamidomethylation	104621	ADAMTS-like protein 2 OS=Homo sapiens OX=9606 GN=ADAMTSL2 PE=1 SV=1
674	281	Q16363|LAMA4_HUMAN	220.95	168.44	157.97	5021.9	5568.8	29381	16	16	1	1	1	20	14	13	Carbamidomethylation; Acetylation (Protein N-term)	202523	Laminin subunit alpha-4 OS=Homo sapiens OX=9606 GN=LAMA4 PE=1 SV=4
266	564	P23515|OMGP_HUMAN	46969	61977	45500	121030	131350	150610	16	16	35	35	30	40	36	34	Carbamidomethylation	49608	Oligodendrocyte-myelin glycoprotein OS=Homo sapiens OX=9606 GN=OMG PE=1 SV=2
346	640	P61916|NPC2_HUMAN	169980	147710	130780	8829.4	8063.2	5427.7	12	12	47	46	44	6	9	5	Carbamidomethylation; Oxidation (M)	16570	NPC intracellular cholesterol transporter 2 OS=Homo sapiens OX=9606 GN=NPC2 PE=1 SV=1
474	305	Q6UWH4|GAK1B_HUMAN	1107.3	1064.4	326.74	28146	29305	24900	18	18	8	6	5	25	24	27	Carbamidomethylation	57552	Golgi-associated kinase 1B OS=Homo sapiens OX=9606 GN=GASK1B PE=2 SV=1
520	344	O95967|FBLN4_HUMAN	20828	19616	14525		1403.2	0	16	16	28	26	21	0	4	2	Carbamidomethylation	49405	EGF-containing fibulin-like extracellular matrix protein 2 OS=Homo sapiens OX=9606 GN=EFEMP2 PE=1 SV=3
517	449	P17677|NEUM_HUMAN	0	0		19843	30413	27445	14	14	1	1	0	29	27	24	Acetylation (Protein N-term)	24803	Neuromodulin OS=Homo sapiens OX=9606 GN=GAP43 PE=1 SV=1
492	375	Q9NY97|B3GN2_HUMAN	1904.1	4148.3	957.39	40492	38831	32204	14	14	3	6	4	29	25	22	Carbamidomethylation	46022	N-acetyllactosaminide beta-1 3-N-acetylglucosaminyltransferase 2 OS=Homo sapiens OX=9606 GN=B3GNT2 PE=1 SV=2
426	881	P04433|KV311_HUMAN	3392.6	3971.1	0	53020	46665	66308	15	8	5	5	6	34	34	25	Carbamidomethylation	12575	Immunoglobulin kappa variable 3-11 OS=Homo sapiens OX=9606 GN=IGKV3-11 PE=1 SV=1
564	282	O94910|AGRL1_HUMAN	2290.8	3403.9	2246.3	7780.1	7092.6	3872	19	19	10	10	7	13	14	18	Carbamidomethylation	162716	Adhesion G protein-coupled receptor L1 OS=Homo sapiens OX=9606 GN=ADGRL1 PE=1 SV=1
413	224	P11142|HSP7C_HUMAN	2336.1	3263.3	1526.4	2799.6	2012.4	2483.6	24	14	25	21	23	13	18	16	Carbamidomethylation	70898	Heat shock cognate 71 kDa protein OS=Homo sapiens OX=9606 GN=HSPA8 PE=1 SV=1
351	365	P25311|ZA2G_HUMAN	46464	45267	36961	7872.3	8958	6028.9	16	16	40	35	35	13	17	12	Carbamidomethylation; Oxidation (M)	34259	Zinc-alpha-2-glycoprotein OS=Homo sapiens OX=9606 GN=AZGP1 PE=1 SV=2
194	745	P01763|HV348_HUMAN				1614.3	2318.2	1229.1	18	1	20	19	20	77	83	79	Carbamidomethylation	12813	Immunoglobulin heavy variable 3-48 OS=Homo sapiens OX=9606 GN=IGHV3-48 PE=1 SV=2
531	230	Q8NFP4|MDGA1_HUMAN				17152	19611	12835	22	22	0	0	0	22	29	28	Carbamidomethylation	105790	MAM domain-containing glycosylphosphatidylinositol anchor protein 1 OS=Homo sapiens OX=9606 GN=MDGA1 PE=1 SV=1
799	364	P54289|CA2D1_HUMAN	1366.4	2626.1	998.7				13	13	11	14	9	0	0	0	Carbamidomethylation	124568	Voltage-dependent calcium channel subunit alpha-2/delta-1 OS=Homo sapiens OX=9606 GN=CACNA2D1 PE=1 SV=3
190	670	P01780|HV307_HUMAN	780.73	1080.4	542.61	26682	25933	24479	17	2	20	18	20	80	83	79	Carbamidomethylation	12943	Immunoglobulin heavy variable 3-7 OS=Homo sapiens OX=9606 GN=IGHV3-7 PE=1 SV=2
336	542	P19022|CADH2_HUMAN	154820	168890	142680	6835.4	9469.5	6526.2	13	13	45	49	51	5	7	7	Carbamidomethylation; Oxidation (M)	99809	Cadherin-2 OS=Homo sapiens OX=9606 GN=CDH2 PE=1 SV=4
662	419	Q9HAT2|SIAE_HUMAN				9852.8	13488	9780	14	14	0	0	0	16	18	18	Carbamidomethylation	58315	Sialate O-acetylesterase OS=Homo sapiens OX=9606 GN=SIAE PE=1 SV=1
439	521	Q9UBX7|KLK11_HUMAN	849.23		773.32	19266	20661	17725	11	10	15	9	10	21	27	22	Carbamidomethylation	31059	Kallikrein-11 OS=Homo sapiens OX=9606 GN=KLK11 PE=1 SV=2
641	483	Q9UK55|ZPI_HUMAN	623.79	1096.4	288.91	21030	25097	19588	16	16	3	5	2	15	15	15	Carbamidomethylation	50707	Protein Z-dependent protease inhibitor OS=Homo sapiens OX=9606 GN=SERPINA10 PE=1 SV=1
330	245	P47972|NPTX2_HUMAN	8827	10550	7321.6	37851	36213	28958	24	23	21	26	25	32	34	31	Carbamidomethylation	47042	Neuronal pentraxin-2 OS=Homo sapiens OX=9606 GN=NPTX2 PE=1 SV=2
480	1141	O75711|SCRG1_HUMAN	132060	148470	96789	691.79	641.75	577.1	9	9	28	34	25	2	3	2	Carbamidomethylation; Oxidation (M); Acetylation (Protein N-term)	11081	Scrapie-responsive protein 1 OS=Homo sapiens OX=9606 GN=SCRG1 PE=1 SV=1
447	322	O43854|EDIL3_HUMAN	4624.7	6073	3196	16317	26517	17513	14	14	16	13	13	19	24	17	Carbamidomethylation	53765	EGF-like repeat and discoidin I-like domain-containing protein 3 OS=Homo sapiens OX=9606 GN=EDIL3 PE=1 SV=1
550	325	Q6UWY5|OLFL1_HUMAN	438.04	605.31	196.98	15003	13283	10740	17	17	8	8	1	22	18	18	Carbamidomethylation	45951	Olfactomedin-like protein 1 OS=Homo sapiens OX=9606 GN=OLFML1 PE=1 SV=2
216	956	P01601|KVD16_HUMAN				1792.2	1680.2	1099.9	20	1	4	9	5	66	86	95	Carbamidomethylation; Oxidation (M)	12730	Immunoglobulin kappa variable 1D-16 OS=Homo sapiens OX=9606 GN=IGKV1D-16 PE=3 SV=2
433	809	O15354|GPR37_HUMAN	21525	24876	11688	21392	41746	21324	17	17	18	15	8	20	25	20		67114	Prosaposin receptor GPR37 OS=Homo sapiens OX=9606 GN=GPR37 PE=1 SV=2
578	369	P68371|TBB4B_HUMAN	2226	2964.3	1911.6	770.76	694.44	645.95	14	2	19	18	14	5	7	7	Carbamidomethylation	49831	Tubulin beta-4B chain OS=Homo sapiens OX=9606 GN=TUBB4B PE=1 SV=1
342	525	P30086|PEBP1_HUMAN	13710	19990	12296	68619	64592	63327	10	10	29	25	23	29	28	25	Carbamidomethylation	21057	Phosphatidylethanolamine-binding protein 1 OS=Homo sapiens OX=9606 GN=PEBP1 PE=1 SV=3
393	824	P31151|S10A7_HUMAN	538.18	1257.8	450.65	17804	20994	16012	10	4	13	15	9	36	31	25	Carbamidomethylation; Oxidation (M)	11471	Protein S100-A7 OS=Homo sapiens OX=9606 GN=S100A7 PE=1 SV=4
504	243	Q09328|MGT5A_HUMAN	1141.8	1171.3	186.91	12920	12485	12389	26	25	4	4	5	24	23	25	Carbamidomethylation	84543	Alpha-1 6-mannosylglycoprotein 6-beta-N-acetylglucosaminyltransferase A OS=Homo sapiens OX=9606 GN=MGAT5 PE=1 SV=1
289	943	P01602|KV105_HUMAN				5401.3	6880.9	4517.5	17	6	4	8	5	56	62	56	Carbamidomethylation; Oxidation (M)	12782	Immunoglobulin kappa variable 1-5 OS=Homo sapiens OX=9606 GN=IGKV1-5 PE=1 SV=2
420	349	Q14982|OPCM_HUMAN	32892	31051	26988	53295	10363	6966.1	18	14	14	21	18	21	18	21	Carbamidomethylation; Oxidation (M)	38008	Opioid-binding protein/cell adhesion molecule OS=Homo sapiens OX=9606 GN=OPCML PE=1 SV=1
757	485	Q15782|CH3L2_HUMAN				13364	13802	8266.8	12	12	0	0	0	14	14	11	Carbamidomethylation	43501	Chitinase-3-like protein 2 OS=Homo sapiens OX=9606 GN=CHI3L2 PE=1 SV=1
576	411	P43121|MUC18_HUMAN	2533.3	3912.2	3782.9	28032	28436	21667	14	14	7	8	12	14	18	12	Carbamidomethylation	71608	Cell surface glycoprotein MUC18 OS=Homo sapiens OX=9606 GN=MCAM PE=1 SV=2
494	740	P69905|HBA_HUMAN	180.55	513.83	0	67604	73200	56822	7	7	5	4	2	23	24	31	Carbamidomethylation; Oxidation (M)	15258	Hemoglobin subunit alpha OS=Homo sapiens OX=9606 GN=HBA1 PE=1 SV=2
395	601	P03973|SLPI_HUMAN	1003.5	1332.3	456.75	125170	130870	106740	16	16	5	5	2	40	38	38	Carbamidomethylation; Oxidation (M)	14326	Antileukoproteinase OS=Homo sapiens OX=9606 GN=SLPI PE=1 SV=2
647	596	Q99674|CGRE1_HUMAN	5302.3	8703.8	9337.9				10	10	20	17	17	0	0	0		33456	Cell growth regulator with EF hand domain protein 1 OS=Homo sapiens OX=9606 GN=CGREF1 PE=2 SV=3
626	358	P29401|TKT_HUMAN				18933	17698	13121	15	15	0	0	0	20	20	18	Carbamidomethylation; Acetylation (Protein N-term)	67878	Transketolase OS=Homo sapiens OX=9606 GN=TKT PE=1 SV=3
628	414	O43827|ANGL7_HUMAN	0	0	0	15453	13536	12274	13	13	3	4	1	18	17	15	Carbamidomethylation	40018	Angiopoietin-related protein 7 OS=Homo sapiens OX=9606 GN=ANGPTL7 PE=1 SV=1
479	495	P23528|COF1_HUMAN	2623.4	5876	3633.8	28374	34745	27966	12	8	9	9	9	22	24	21	Carbamidomethylation; Acetylation (Protein N-term)	18502	Cofilin-1 OS=Homo sapiens OX=9606 GN=CFL1 PE=1 SV=3
617	319	O75077|ADA23_HUMAN				12204	11469	8761.3	17	17	0	0	0	19	19	21	Carbamidomethylation; Acetylation (Protein N-term)	91926	Disintegrin and metalloproteinase domain-containing protein 23 OS=Homo sapiens OX=9606 GN=ADAM23 PE=1 SV=1
594	355	Q8WZA1|PMGT1_HUMAN	6386.9	9923.7	7268.1	740.44	1228.7	453.7	16	16	14	23	21	4	3	1	Carbamidomethylation	75252	Protein O-linked-mannose beta-1 2-N-acetylglucosaminyltransferase 1 OS=Homo sapiens OX=9606 GN=POMGNT1 PE=1 SV=2
636	362	Q8IWY4|SCUB1_HUMAN				31328	7661.2	23082	13	11	3	2	3	17	17	13	Carbamidomethylation	107910	Signal peptide CUB and EGF-like domain-containing protein 1 OS=Homo sapiens OX=9606 GN=SCUBE1 PE=1 SV=3
618	415	P09104|ENOG_HUMAN	1823.8	4098.6	3312				12	8	12	14	17	5	7	4	Carbamidomethylation	47269	Gamma-enolase OS=Homo sapiens OX=9606 GN=ENO2 PE=1 SV=3
457	969	A0A0C4DH72|KV106_HUMAN				24527	16914	17029	21	2	1	3	2	32	32	30	Carbamidomethylation; Acetylation (Protein N-term)	12697	Immunoglobulin kappa variable 1-6 OS=Homo sapiens OX=9606 GN=IGKV1-6 PE=3 SV=1
475	288	Q00973|B4GN1_HUMAN	1859	2260.1	1545.1	3164.4	3322.7	2803.7	16	16	19	16	21	13	13	13	Carbamidomethylation	58882	Beta-1 4 N-acetylgalactosaminyltransferase 1 OS=Homo sapiens OX=9606 GN=B4GALNT1 PE=1 SV=2
263	706	P02747|C1QC_HUMAN	31000	36435	26136	432140	581110	380340	13	13	13	18	15	51	61	53	Carbamidomethylation; Oxidation (M)	25774	Complement C1q subcomponent subunit C OS=Homo sapiens OX=9606 GN=C1QC PE=1 SV=3
538	527	P07711|CATL1_HUMAN	676.4	2088.6	625.07	40162	38417	29310	13	9	6	6	3	18	20	23	Carbamidomethylation; Oxidation (M)	37564	Cathepsin L1 OS=Homo sapiens OX=9606 GN=CTSL PE=1 SV=2
498	713	Q9BSG5|RTBDN_HUMAN	4924.3	6670	4517.6	17038	18549	14904	9	9	13	17	10	15	20	13	Carbamidomethylation	24615	Retbindin OS=Homo sapiens OX=9606 GN=RTBDN PE=1 SV=2
237	541	P49908|SEPP1_HUMAN	20517	20199	18212	217790	273760	185180	22	22	20	22	19	52	59	61	Carbamidomethylation; Oxidation (M)	43174	Selenoprotein P OS=Homo sapiens OX=9606 GN=SELENOP PE=1 SV=3
516	239	P19320|VCAM1_HUMAN	6609.5	9099.6	3627.6				19	19	30	26	26	0	0	0	Carbamidomethylation	81276	Vascular cell adhesion protein 1 OS=Homo sapiens OX=9606 GN=VCAM1 PE=1 SV=1
675	286	P00488|F13A_HUMAN		0		16959	16583	10927	16	16	0	1	0	17	17	14	Carbamidomethylation	83267	Coagulation factor XIII A chain OS=Homo sapiens OX=9606 GN=F13A1 PE=1 SV=4
421	662	P02763|A1AG1_HUMAN	58607	65347	53507	4804.1	4081.5	1520.9	10	7	28	29	30	9	9	8	Carbamidomethylation; Oxidation (M)	23512	Alpha-1-acid glycoprotein 1 OS=Homo sapiens OX=9606 GN=ORM1 PE=1 SV=1
485	975	A0A0C4DH68|KV224_HUMAN	711.18	1023.5	571.68	58131	58880	57562	17	9	2	2	5	24	28	30	Carbamidomethylation	13079	Immunoglobulin kappa variable 2-24 OS=Homo sapiens OX=9606 GN=IGKV2-24 PE=3 SV=1
514	392	P40925|MDHC_HUMAN	1351.3	1132	676.3	52135	58372	39577	15	15	6	6	3	24	22	22	Carbamidomethylation; Acetylation (Protein N-term)	36426	Malate dehydrogenase cytoplasmic OS=Homo sapiens OX=9606 GN=MDH1 PE=1 SV=4
331	484	Q02985|FHR3_HUMAN	0	0	0	32815	41809	29054	17	8	9	12	10	40	46	50	Carbamidomethylation; Acetylation (Protein N-term)	37323	Complement factor H-related protein 3 OS=Homo sapiens OX=9606 GN=CFHR3 PE=1 SV=2
220	879	P01766|HV313_HUMAN				4439.4	5042.4	3689.2	12	3	15	13	13	70	77	74	Carbamidomethylation	12506	Immunoglobulin heavy variable 3-13 OS=Homo sapiens OX=9606 GN=IGHV3-13 PE=1 SV=2
686	516	Q9Y5W5|WIF1_HUMAN	0	0	0	8220.2	9772	5203.8	12	12	1	1	1	16	16	14	Carbamidomethylation	41528	Wnt inhibitory factor 1 OS=Homo sapiens OX=9606 GN=WIF1 PE=1 SV=3
639	410	Q13642|FHL1_HUMAN	0	0		14041	16373	12055	13	13	1	2	0	14	23	15	Carbamidomethylation	36263	Four and a half LIM domains protein 1 OS=Homo sapiens OX=9606 GN=FHL1 PE=1 SV=4
401	450	Q99784|NOE1_HUMAN	2848	4996.2	2433.4	72856	80491	62435	13	13	8	9	6	33	42	27	Carbamidomethylation; Oxidation (M)	55343	Noelin OS=Homo sapiens OX=9606 GN=OLFM1 PE=1 SV=4
568	296	Q16658|FSCN1_HUMAN				17104	27179	15040	20	20	0	0	0	26	26	20	Carbamidomethylation	54530	Fascin OS=Homo sapiens OX=9606 GN=FSCN1 PE=1 SV=3
465	312	Q08554|DSC1_HUMAN	1169.4	1812.9	985.35	20518	15754	17358	15	15	7	7	5	25	26	27	Carbamidomethylation; Oxidation (M)	99987	Desmocollin-1 OS=Homo sapiens OX=9606 GN=DSC1 PE=1 SV=2
484	386	Q53RD9|FBLN7_HUMAN	0	0	59	28051	26442	18121	14	14	4	7	7	27	28	18	Carbamidomethylation	47376	Fibulin-7 OS=Homo sapiens OX=9606 GN=FBLN7 PE=2 SV=1
581	538	P50897|PPT1_HUMAN	1321.8	2091.4	1296.9	12854	10751	9139.8	12	12	8	10	10	18	12	12	Carbamidomethylation	34193	Palmitoyl-protein thioesterase 1 OS=Homo sapiens OX=9606 GN=PPT1 PE=1 SV=1
676	448	Q6UWR7|ENPP6_HUMAN	315.8		58.33	7551.2	14344	13683	12	12	1	0	1	13	16	19		50241	Ectonucleotide pyrophosphatase/phosphodiesterase family member 6 OS=Homo sapiens OX=9606 GN=ENPP6 PE=1 SV=2
374	831	A0A0C4DH73|KV112_HUMAN		100.62	0	31032	44149	31497	17	2	1	4	3	36	53	40	Carbamidomethylation; Oxidation (M)	12645	Immunoglobulin kappa variable 1-12 OS=Homo sapiens OX=9606 GN=IGKV1-12 PE=3 SV=1
374	844	P01611|KVD12_HUMAN		100.62	0	31032	44149	31497	17	2	1	4	3	36	53	40	Carbamidomethylation; Oxidation (M)	12620	Immunoglobulin kappa variable 1D-12 OS=Homo sapiens OX=9606 GN=IGKV1D-12 PE=1 SV=2
497	348	P16519|NEC2_HUMAN	28254	28299	20700	4499.7	4389.1	3248.5	16	16	27	20	20	9	7	5	Carbamidomethylation; Oxidation (M)	70565	Neuroendocrine convertase 2 OS=Homo sapiens OX=9606 GN=PCSK2 PE=1 SV=2
499	984	P01714|LV319_HUMAN	3848.6	5013.2	4067	157410	150870	117020	10	9	4	6	3	21	27	27	Carbamidomethylation	12042	Immunoglobulin lambda variable 3-19 OS=Homo sapiens OX=9606 GN=IGLV3-19 PE=1 SV=2
473	475	Q9UBQ6|EXTL2_HUMAN	2525.9	3318.7	2345.7	25646	32139	27101	12	12	10	15	12	17	21	20	Carbamidomethylation	37466	Exostosin-like 2 OS=Homo sapiens OX=9606 GN=EXTL2 PE=1 SV=1
584	537	O00560|SDCB1_HUMAN	4364.6	5001	3874.3	16198	14410	13347	13	13	11	11	8	15	14	10	Carbamidomethylation	32444	Syntenin-1 OS=Homo sapiens OX=9606 GN=SDCBP PE=1 SV=1
214	945	P01599|KV117_HUMAN				768.07	292.58	670.33	19	1	4	9	5	64	87	97	Carbamidomethylation; Oxidation (M)	12779	Immunoglobulin kappa variable 1-17 OS=Homo sapiens OX=9606 GN=IGKV1-17 PE=1 SV=2
624	329	Q9Y4L1|HYOU1_HUMAN	3275.7	3975.6	2695.7	4739.3	3650.3	1693.1	16	16	9	14	10	8	8	9	Acetylation (Protein N-term)	111335	Hypoxia up-regulated protein 1 OS=Homo sapiens OX=9606 GN=HYOU1 PE=1 SV=1
227	820	P35542|SAA4_HUMAN	5288.1	6687.6	2815.4	319570	375850	257430	16	16	8	11	8	80	81	65	Oxidation (M)	14747	Serum amyloid A-4 protein OS=Homo sapiens OX=9606 GN=SAA4 PE=1 SV=2
586	407	P22748|CAH4_HUMAN				34746	36226	26336	13	13	0	0	0	21	23	24	Carbamidomethylation	35032	Carbonic anhydrase 4 OS=Homo sapiens OX=9606 GN=CA4 PE=1 SV=2
212	774	A0A0B4J1Y9|HV372_HUMAN			0	12553	12561	10790	13	3	17	15	16	73	73	76	Carbamidomethylation	13203	Immunoglobulin heavy variable 3-72 OS=Homo sapiens OX=9606 GN=IGHV3-72 PE=3 SV=1
434	366	Q9ULF5|S39AA_HUMAN	6092.9	4133.1	4341.1	27808	28974	20408	15	15	13	9	7	25	26	25	Carbamidomethylation	94132	Zinc transporter ZIP10 OS=Homo sapiens OX=9606 GN=SLC39A10 PE=1 SV=2
257	352	Q01995|TAGL_HUMAN	16001	18674	12645	87744	97950	75665	18	17	35	28	31	42	44	37	Carbamidomethylation	22611	Transgelin OS=Homo sapiens OX=9606 GN=TAGLN PE=1 SV=4
613	385	P27918|PROP_HUMAN				37150	29038	25476	15	15	0	0	0	20	22	18	Carbamidomethylation	51276	Properdin OS=Homo sapiens OX=9606 GN=CFP PE=1 SV=2
405	402	P55290|CAD13_HUMAN	125720	141090	115380	1511.9	1401.2	613.54	15	15	35	40	38	3	4	3	Carbamidomethylation; Oxidation (M)	78287	Cadherin-13 OS=Homo sapiens OX=9606 GN=CDH13 PE=1 SV=1
555	463	P00740|FA9_HUMAN	8341.6	11492	6606.4	8915.6	9291.9	6964.3	11	11	15	18	13	8	9	11	Carbamidomethylation	51778	Coagulation factor IX OS=Homo sapiens OX=9606 GN=F9 PE=1 SV=2
549	350	P13611|CSPG2_HUMAN	782.53	1049.7	821.44	21582	18788	16123	21	21	3	2	4	22	17	27	Carbamidomethylation	372821	Versican core protein OS=Homo sapiens OX=9606 GN=VCAN PE=1 SV=3
669	468	Q9BWS9|CHID1_HUMAN			149.85	16019	19561	16122	12	12	0	0	1	17	19	14	Carbamidomethylation	44941	Chitinase domain-containing protein 1 OS=Homo sapiens OX=9606 GN=CHID1 PE=1 SV=1
512	599	P19652|A1AG2_HUMAN	21663	25418	18312	4150.8	4873.4	3693.8	10	7	24	21	16	8	7	8	Carbamidomethylation	23603	Alpha-1-acid glycoprotein 2 OS=Homo sapiens OX=9606 GN=ORM2 PE=1 SV=2
233	1006	A0A0C4DH41|HV461_HUMAN				3396	693.16	2700.3	16	3	5	5	5	70	70	79	Carbamidomethylation	13066	Immunoglobulin heavy variable 4-61 OS=Homo sapiens OX=9606 GN=IGHV4-61 PE=3 SV=1
233	1021	P01825|HV459_HUMAN				3396	693.16	2700.3	16	3	5	5	5	70	70	79	Carbamidomethylation	12936	Immunoglobulin heavy variable 4-59 OS=Homo sapiens OX=9606 GN=IGHV4-59 PE=1 SV=2
385	580	Q99983|OMD_HUMAN	48892	49724	39269	9317.1	20030	9485.1	13	13	28	31	23	19	19	14	Carbamidomethylation	49492	Osteomodulin OS=Homo sapiens OX=9606 GN=OMD PE=1 SV=1
367	396	P17936|IBP3_HUMAN	7334	8755.4	4946.4	56865	63491	45678	22	22	19	15	15	31	36	27	Carbamidomethylation; Oxidation (M)	31674	Insulin-like growth factor-binding protein 3 OS=Homo sapiens OX=9606 GN=IGFBP3 PE=1 SV=2
575	742	P01817|HV205_HUMAN	836.31	735.51	400.87	61985	60030	52173	14	12	4	7	3	21	16	20	Carbamidomethylation	13231	Immunoglobulin heavy variable 2-5 OS=Homo sapiens OX=9606 GN=IGHV2-5 PE=1 SV=2
251	557	Q7Z794|K2C1B_HUMAN	0	0		1249.4	272.51		18	4	45	39	40	34	28	36		61901	Keratin type II cytoskeletal 1b OS=Homo sapiens OX=9606 GN=KRT77 PE=2 SV=3
598	424	P07195|LDHB_HUMAN	2302.5	4329.8	2553.5	2851.9	3400.5	2557.3	13	12	11	18	11	8	8	8	Carbamidomethylation	36639	L-lactate dehydrogenase B chain OS=Homo sapiens OX=9606 GN=LDHB PE=1 SV=2
487	328	P22004|BMP6_HUMAN	1716.2	3275.2	1548.7	11146	27369	7398.3	17	16	11	18	11	20	14	16	Carbamidomethylation	57226	Bone morphogenetic protein 6 OS=Homo sapiens OX=9606 GN=BMP6 PE=1 SV=1
200	747	A0A0J9YX35|HV64D_HUMAN		1229.7	521.31	29514	42519	36717	15	3	17	17	18	71	83	80	Carbamidomethylation; Acetylation (Protein N-term)	12823	Immunoglobulin heavy variable 3-64D OS=Homo sapiens OX=9606 GN=IGHV3-64D PE=3 SV=1
557	360	O43173|SIA8C_HUMAN	1028.7	1425.4	666.27	16869	16990	12489	16	16	8	6	6	22	18	14	Carbamidomethylation	43970	Sia-alpha-2 3-Gal-beta-1 4-GlcNAc-R:alpha 2 8-sialyltransferase OS=Homo sapiens OX=9606 GN=ST8SIA3 PE=1 SV=3
357	998	P08493|MGP_HUMAN	157620	159290	131760	121530	142780	94935	16	16	32	41	25	19	21	12	Carbamidomethylation; Oxidation (M)	12353	Matrix Gla protein OS=Homo sapiens OX=9606 GN=MGP PE=1 SV=2
627	482	Q96FE5|LIGO1_HUMAN	300.23	886.79	228.15	20083	20848	18309	14	14	2	2	3	19	15	17	Carbamidomethylation	69876	Leucine-rich repeat and immunoglobulin-like domain-containing nogo receptor-interacting protein 1 OS=Homo sapiens OX=9606 GN=LINGO1 PE=1 SV=2
566	1267	A0A0A0MRZ7|KVD26_HUMAN				915.36	934.38		12	1	2	3	4	22	26	15	Acetylation (Protein N-term)	13297	Immunoglobulin kappa variable 2D-26 OS=Homo sapiens OX=9606 GN=IGKV2D-26 PE=3 SV=1
579	439	P78539|SRPX_HUMAN	1381.7	2322.9	925.96	8793.5	10787	8265.5	16	16	5	8	3	16	21	17	Carbamidomethylation	51572	Sushi repeat-containing protein SRPX OS=Homo sapiens OX=9606 GN=SRPX PE=1 SV=1
723	500	Q8N428|GLT16_HUMAN				11000	9649.7	5110.2	12	12	0	0	0	14	12	17	Carbamidomethylation	63074	Polypeptide N-acetylgalactosaminyltransferase 16 OS=Homo sapiens OX=9606 GN=GALNT16 PE=1 SV=2
515	589	P09382|LEG1_HUMAN	38823	44797	32284		802.83	0	11	11	29	26	25	0	2	1	Carbamidomethylation; Acetylation (Protein N-term)	14716	Galectin-1 OS=Homo sapiens OX=9606 GN=LGALS1 PE=1 SV=2
667	267	Q9Y6N6|LAMC3_HUMAN				7214.8	5240	3878.1	18	16	0	0	0	13	23	15	Carbamidomethylation; Acetylation (Protein N-term)	171227	Laminin subunit gamma-3 OS=Homo sapiens OX=9606 GN=LAMC3 PE=1 SV=3
638	466	O60279|SUSD5_HUMAN	6164.1	6821.9	2780.9			0	14	14	20	18	16	0	0	1	Carbamidomethylation	68021	Sushi domain-containing protein 5 OS=Homo sapiens OX=9606 GN=SUSD5 PE=1 SV=3
574	568	Q504Y0|S39AC_HUMAN	3382.4	4654.6	2603.2	15526	15734	11771	10	10	8	9	10	11	17	16	Carbamidomethylation; Oxidation (M)	76666	Zinc transporter ZIP12 OS=Homo sapiens OX=9606 GN=SLC39A12 PE=2 SV=3
533	327	Q12797|ASPH_HUMAN		0		20028	20475	19144	18	18	0	1	0	24	26	27	Carbamidomethylation	85863	Aspartyl/asparaginyl beta-hydroxylase OS=Homo sapiens OX=9606 GN=ASPH PE=1 SV=3
534	354	Q86VZ4|LRP11_HUMAN	709.51	1880.1	386	16101	15093	12381	13	13	5	8	7	20	19	19	Carbamidomethylation	53311	Low-density lipoprotein receptor-related protein 11 OS=Homo sapiens OX=9606 GN=LRP11 PE=2 SV=2
361	766	Q9UPU3|SORC3_HUMAN	18175	22304	15361	67001	72620	62383	14	13	19	23	16	28	28	33	Oxidation (M)	135755	VPS10 domain-containing receptor SorCS3 OS=Homo sapiens OX=9606 GN=SORCS3 PE=2 SV=2
693	283	Q9NYQ8|FAT2_HUMAN	1375	2362	1726.4				16	16	16	18	13	0	0	0	Carbamidomethylation	479321	Protocadherin Fat 2 OS=Homo sapiens OX=9606 GN=FAT2 PE=1 SV=2
215	563	Q5XKE5|K2C79_HUMAN						0	21	1	46	51	41	38	46	44	Oxidation (M); Acetylation (Protein N-term)	57836	Keratin type II cytoskeletal 79 OS=Homo sapiens OX=9606 GN=KRT79 PE=1 SV=2
640	409	Q14393|GAS6_HUMAN	691.43	653.85	678.66	7172.2	18869	14893	12	12	6	3	9	10	12	15	Carbamidomethylation	74925	Growth arrest-specific protein 6 OS=Homo sapiens OX=9606 GN=GAS6 PE=1 SV=3
493	446	Q6UX71|PXDC2_HUMAN	13649	17700	11737	3242	2917.9	2864.8	12	11	21	23	21	8	8	8	Carbamidomethylation	59583	Plexin domain-containing protein 2 OS=Homo sapiens OX=9606 GN=PLXDC2 PE=1 SV=1
496	317	O60476|MA1A2_HUMAN	1290	1743.7	256.9	14934	8419.5	6926.1	17	15	8	8	5	24	22	21	Carbamidomethylation	73004	Mannosyl-oligosaccharide 1 2-alpha-mannosidase IB OS=Homo sapiens OX=9606 GN=MAN1A2 PE=1 SV=1
507	287	P07686|HEXB_HUMAN	910.42	1898.6	653.11	25896	68678	23540	17	17	5	6	6	21	24	23	Carbamidomethylation	63111	Beta-hexosaminidase subunit beta OS=Homo sapiens OX=9606 GN=HEXB PE=1 SV=3
402	533	Q6FHJ7|SFRP4_HUMAN	9026.3	11029	7429.1	87810	96943	61202	12	12	10	10	8	38	32	27	Carbamidomethylation; Oxidation (M)	39827	Secreted frizzled-related protein 4 OS=Homo sapiens OX=9606 GN=SFRP4 PE=1 SV=2
529	960	A0A0C4DH69|KV109_HUMAN				9466.2	7577.7	5586.7	15	2	3	4	3	23	26	20	Carbamidomethylation	12715	Immunoglobulin kappa variable 1-9 OS=Homo sapiens OX=9606 GN=IGKV1-9 PE=3 SV=1
668	353	Q99985|SEM3C_HUMAN				11800	14405	7938.9	14	14	0	0	0	16	17	18	Carbamidomethylation	85207	Semaphorin-3C OS=Homo sapiens OX=9606 GN=SEMA3C PE=2 SV=2
521	434	P80303|NUCB2_HUMAN	2460	4528	1063.2	10446	12118	5624	13	12	6	14	14	19	14	14		50223	Nucleobindin-2 OS=Homo sapiens OX=9606 GN=NUCB2 PE=1 SV=3
808	368	O95980|RECK_HUMAN				3316.1	6369.8	2893.2	12	12	0	0	0	10	13	10	Carbamidomethylation	106457	Reversion-inducing cysteine-rich protein with Kazal motifs OS=Homo sapiens OX=9606 GN=RECK PE=1 SV=1
609	464	P35858|ALS_HUMAN	0			24426	22010	19285	14	14	1	0	0	21	17	22	Carbamidomethylation	66035	Insulin-like growth factor-binding protein complex acid labile subunit OS=Homo sapiens OX=9606 GN=IGFALS PE=1 SV=1
612	400	Q10469|MGAT2_HUMAN	394.8	406.34	275.71	10384	10828	9757.4	14	14	6	3	2	16	18	15	Carbamidomethylation	51550	Alpha-1 6-mannosyl-glycoprotein 2-beta-N-acetylglucosaminyltransferase OS=Homo sapiens OX=9606 GN=MGAT2 PE=1 SV=1
530	420	Q14314|FGL2_HUMAN	279.93	574.98	789.09	59601	62396	45625	16	16	2	3	6	26	23	19	Carbamidomethylation	50229	Fibroleukin OS=Homo sapiens OX=9606 GN=FGL2 PE=1 SV=1
625	405	Q96SM3|CPXM1_HUMAN	1689.5	2686.9	1174.1	11138	12825	11422	13	13	7	6	7	11	17	10	Carbamidomethylation	81668	Probable carboxypeptidase X1 OS=Homo sapiens OX=9606 GN=CPXM1 PE=2 SV=2
809	378	P13639|EF2_HUMAN	0	0		3591	1628.7	1759.1	12	12	2	1	0	15	7	8	Carbamidomethylation	95338	Elongation factor 2 OS=Homo sapiens OX=9606 GN=EEF2 PE=1 SV=4
451	851	A0A0C4DH31|HV118_HUMAN		0		32067	22609	25446	15	6	2	2	1	33	34	29	Carbamidomethylation; Oxidation (M)	12820	Immunoglobulin heavy variable 1-18 OS=Homo sapiens OX=9606 GN=IGHV1-18 PE=3 SV=1
418	451	P58401|NRX2B_HUMAN	972.52	422	505.67	2622.3	5188.3	1707.7	18	3	15	15	18	17	25	23		70927	Neurexin-2-beta OS=Homo sapiens OX=9606 GN=NRXN2 PE=1 SV=1
610	306	Q9H2E6|SEM6A_HUMAN	186.54	0	260.29	12451	15938	13346	18	18	1	2	1	16	18	22	Carbamidomethylation	114395	Semaphorin-6A OS=Homo sapiens OX=9606 GN=SEMA6A PE=1 SV=2
316	657	A0A0B4J1V1|HV321_HUMAN				1310.5	684.85	659.62	18	2	13	15	12	49	47	43	Carbamidomethylation	12840	Immunoglobulin heavy variable 3-21 OS=Homo sapiens OX=9606 GN=IGHV3-21 PE=1 SV=1
562	531	Q7Z3B1|NEGR1_HUMAN	17391	18782	13476				12	12	25	26	22	0	0	0	Carbamidomethylation	38719	Neuronal growth regulator 1 OS=Homo sapiens OX=9606 GN=NEGR1 PE=1 SV=3
472	597	Q99497|PARK7_HUMAN	2677.1	4754.8	1942.9	25996	25032	15072	13	13	12	17	15	23	15	12	Carbamidomethylation	19891	Protein/nucleic acid deglycase DJ-1 OS=Homo sapiens OX=9606 GN=PARK7 PE=1 SV=2
369	666	P01762|HV311_HUMAN				2820	3466.5	2972.1	16	4	10	10	10	38	42	32	Carbamidomethylation	12909	Immunoglobulin heavy variable 3-11 OS=Homo sapiens OX=9606 GN=IGHV3-11 PE=1 SV=2
511	324	P15311|EZRI_HUMAN	323.72	394.69	265.41	2173.5	2562	817.57	16	6	4	5	2	25	31	17	Carbamidomethylation	69413	Ezrin OS=Homo sapiens OX=9606 GN=EZR PE=1 SV=4
239	958	P06331|HV434_HUMAN				251.62	1084.4	1411.1	15	1	5	5	5	70	71	75	Carbamidomethylation	13815	Immunoglobulin heavy variable 4-34 OS=Homo sapiens OX=9606 GN=IGHV4-34 PE=1 SV=2
510	261	P32004|L1CAM_HUMAN	3866.8	5918.7	2656	255.24	212.04	568.1	18	17	29	26	22	1	2	4	Carbamidomethylation	140003	Neural cell adhesion molecule L1 OS=Homo sapiens OX=9606 GN=L1CAM PE=1 SV=2
660	523	O14498|ISLR_HUMAN	10796	11927	10614				10	10	18	18	17	0	0	0	Carbamidomethylation	45997	Immunoglobulin superfamily containing leucine-rich repeat protein OS=Homo sapiens OX=9606 GN=ISLR PE=2 SV=1
325	951	A0A075B6R2|HV404_HUMAN	0	0	0	22890	28112	18250	15	5	6	5	4	49	57	53	Carbamidomethylation	12848	Immunoglobulin heavy variable 4-4 OS=Homo sapiens OX=9606 GN=IGHV4-4 PE=3 SV=2
470	778	Q16627|CCL14_HUMAN	0	0	0	48389	47516	45648	12	12	5	4	3	28	30	26	Carbamidomethylation; Oxidation (M)	10678	C-C motif chemokine 14 OS=Homo sapiens OX=9606 GN=CCL14 PE=1 SV=1
583	522	Q9UGM5|FETUB_HUMAN	12792	12508	10199	3779	3174.8	1750.1	11	11	12	20	20	8	4	5	Carbamidomethylation	42055	Fetuin-B OS=Homo sapiens OX=9606 GN=FETUB PE=1 SV=2
540	506	O95390|GDF11_HUMAN	3069.7	2777.4	789.26	13276	18437	9538.2	11	9	7	7	3	23	23	14	Carbamidomethylation	45091	Growth/differentiation factor 11 OS=Homo sapiens OX=9606 GN=GDF11 PE=1 SV=1
841	341	Q9NY15|STAB1_HUMAN	55.774	226.88	0	1444.9	2159.2	1364.3	14	14	2	9	1	5	7	6	Carbamidomethylation	275480	Stabilin-1 OS=Homo sapiens OX=9606 GN=STAB1 PE=1 SV=3
611	313	P00325|ADH1B_HUMAN	0	0		11386	10411	8884.9	17	17	1	1	0	20	20	18	Carbamidomethylation	39855	All-trans-retinol dehydrogenase [NAD(+)] ADH1B OS=Homo sapiens OX=9606 GN=ADH1B PE=1 SV=2
548	345	Q9C0A0|CNTP4_HUMAN	3685.3	4814.4	2567.4	6282.4	4654.3	2907.9	14	14	20	19	11	8	10	7	Carbamidomethylation	145274	Contactin-associated protein-like 4 OS=Homo sapiens OX=9606 GN=CNTNAP4 PE=1 SV=3
929	487	Q6IEE7|T132E_HUMAN				3337.5	2833.4	1391.7	10	10	0	0	0	11	6	6	Carbamidomethylation	116150	Transmembrane protein 132E OS=Homo sapiens OX=9606 GN=TMEM132E PE=1 SV=2
339	750	A0A0B4J1V0|HV315_HUMAN	482.23	610.84	490.16	17888	19671	15395	14	5	11	12	8	42	39	49	Carbamidomethylation	12926	Immunoglobulin heavy variable 3-15 OS=Homo sapiens OX=9606 GN=IGHV3-15 PE=3 SV=1
650	399	O14793|GDF8_HUMAN			0	13400	10829	10881	13	11	1	3	3	20	14	13	Carbamidomethylation	42750	Growth/differentiation factor 8 OS=Homo sapiens OX=9606 GN=MSTN PE=1 SV=1
567	560	P31944|CASPE_HUMAN	816.48	1376.5	533.15	16699	12706	10975	12	12	6	13	8	13	17	15	Carbamidomethylation	27680	Caspase-14 OS=Homo sapiens OX=9606 GN=CASP14 PE=1 SV=2
754	403	O43866|CD5L_HUMAN		351.93		13025	12608	12625	13	13	0	2	0	9	13	15	Carbamidomethylation	38088	CD5 antigen-like OS=Homo sapiens OX=9606 GN=CD5L PE=1 SV=1
709	644	O95633|FSTL3_HUMAN	75.609	0	0	17961	18355	13741	8	8	2	2	1	17	11	13	Carbamidomethylation	27663	Follistatin-related protein 3 OS=Homo sapiens OX=9606 GN=FSTL3 PE=1 SV=1
688	619	P15907|SIAT1_HUMAN	1512.6	2296.7	1241.9	4205	4420.2	3096.5	9	9	8	11	7	10	6	7	Carbamidomethylation	46605	Beta-galactoside alpha-2 6-sialyltransferase 1 OS=Homo sapiens OX=9606 GN=ST6GAL1 PE=1 SV=1
453	326	Q8N1N4|K2C78_HUMAN	304.81	1462.8	385.48	4847.7	3908.9	2073.7	21	14	16	17	15	22	16	15	Carbamidomethylation	56866	Keratin type II cytoskeletal 78 OS=Homo sapiens OX=9606 GN=KRT78 PE=1 SV=2
634	465	Q9Y646|CBPQ_HUMAN	5472.3	8405.2	5971	1280.5		3579.3	11	11	12	15	17	3	0	9	Carbamidomethylation	51888	Carboxypeptidase Q OS=Homo sapiens OX=9606 GN=CPQ PE=1 SV=1
466	300	P35241|RADI_HUMAN	22372	27683		939.17	5376.4	891.43	20	7	3	7	0	31	34	22	Carbamidomethylation	68564	Radixin OS=Homo sapiens OX=9606 GN=RDX PE=1 SV=1
704	361	Q92896|GSLG1_HUMAN	0	0	0	10219	9330.8	6715.2	17	17	1	1	1	14	13	16	Carbamidomethylation	134552	Golgi apparatus protein 1 OS=Homo sapiens OX=9606 GN=GLG1 PE=1 SV=2
679	532	P62873|GBB1_HUMAN	737.8	1249.9	548.53				10	5	13	17	14	3	2	1	Carbamidomethylation; Acetylation (Protein N-term)	37377	Guanine nucleotide-binding protein G(I)/G(S)/G(T) subunit beta-1 OS=Homo sapiens OX=9606 GN=GNB1 PE=1 SV=3
764	751	P20396|TRH_HUMAN	4357.5	5318	4021.2	10533	13508	5907.1	8	8	5	7	8	8	7	3	Carbamidomethylation	27404	Pro-thyrotropin-releasing hormone OS=Homo sapiens OX=9606 GN=TRH PE=1 SV=1
738	454	O60242|AGRB3_HUMAN	102.93	288.18		16939	17522	13192	10	9	3	2	1	11	14	10	Carbamidomethylation	171517	Adhesion G protein-coupled receptor B3 OS=Homo sapiens OX=9606 GN=ADGRB3 PE=1 SV=2
488	453	Q06830|PRDX1_HUMAN	4764.8	6021.5	4066.9	21961	19193	25280	13	12	17	17	8	12	17	19	Carbamidomethylation	22110	Peroxiredoxin-1 OS=Homo sapiens OX=9606 GN=PRDX1 PE=1 SV=1
532	370	P68104|EF1A1_HUMAN	5393.9	7361.4	4195.6	8847.4	8322.8	3177.3	15	14	17	11	19	11	12	9	Carbamidomethylation	50141	Elongation factor 1-alpha 1 OS=Homo sapiens OX=9606 GN=EEF1A1 PE=1 SV=1
532	372	Q5VTE0|EF1A3_HUMAN	5393.9	7361.4	4195.6	8847.4	8322.8	3177.3	15	14	17	11	19	11	12	9	Carbamidomethylation	50185	Putative elongation factor 1-alpha-like 3 OS=Homo sapiens OX=9606 GN=EEF1A1P5 PE=5 SV=1
687	499	O14773|TPP1_HUMAN	2875.4	4552.5	1787	369.59		194.41	11	11	16	19	12	1	0	1	Carbamidomethylation	61248	Tripeptidyl-peptidase 1 OS=Homo sapiens OX=9606 GN=TPP1 PE=1 SV=2
689	343	P12107|COBA1_HUMAN				115580	112840	79362	13	13	0	0	0	15	23	10	Carbamidomethylation; Acetylation (Protein N-term)	181064	Collagen alpha-1(XI) chain OS=Homo sapiens OX=9606 GN=COL11A1 PE=1 SV=4
656	323	Q12907|LMAN2_HUMAN	4369.5	6555.7	3918.8	1142.9	1463.3	867.65	16	16	16	18	16	1	1	1	Carbamidomethylation	40229	Vesicular integral-membrane protein VIP36 OS=Homo sapiens OX=9606 GN=LMAN2 PE=1 SV=1
600	512	Q13510|ASAH1_HUMAN	8608.3	10736	8092.6	894.25	210.8	0	12	12	21	20	16	4	2	1	Oxidation (M)	44660	Acid ceramidase OS=Homo sapiens OX=9606 GN=ASAH1 PE=1 SV=5
708	431	P68363|TBA1B_HUMAN	5386.9	7570.3	4874	1084.6	1157.5	699.5	12	12	14	14	13	2	1	2	Carbamidomethylation	50152	Tubulin alpha-1B chain OS=Homo sapiens OX=9606 GN=TUBA1B PE=1 SV=1
382	829	A0A0C4DH38|HV551_HUMAN	1406.3	1430.7	0	104980	103000	83749	12	4	5	4	6	38	43	39	Carbamidomethylation; Oxidation (M); Acetylation (Protein N-term)	12675	Immunoglobulin heavy variable 5-51 OS=Homo sapiens OX=9606 GN=IGHV5-51 PE=3 SV=1
606	394	Q8NBI6|XXLT1_HUMAN	1094.6	760.89	1353	7023.3	5916.9	9049	11	11	7	6	6	11	12	19	Carbamidomethylation	43807	Xyloside xylosyltransferase 1 OS=Homo sapiens OX=9606 GN=XXYLT1 PE=1 SV=1
461	859	A0A087WSY6|KVD15_HUMAN				11679	10682	12711	11	1	4	4	3	32	28	28	Oxidation (M); Acetylation (Protein N-term)	12534	Immunoglobulin kappa variable 3D-15 OS=Homo sapiens OX=9606 GN=IGKV3D-15 PE=3 SV=6
707	334	O60568|PLOD3_HUMAN	0			9310.6	10770	5479	14	14	1	0	0	16	15	14	Carbamidomethylation	84785	Multifunctional procollagen lysine hydroxylase and glycosyltransferase LH3 OS=Homo sapiens OX=9606 GN=PLOD3 PE=1 SV=1
781	649	Q9BY67|CADM1_HUMAN	6710.7	11879	7028.1				12	12	10	13	13	0	0	0	Carbamidomethylation	48509	Cell adhesion molecule 1 OS=Homo sapiens OX=9606 GN=CADM1 PE=1 SV=2
684	470	Q9UN36|NDRG2_HUMAN	7790.6	7757.7	6440.3	490.1	600.74	556.92	11	11	10	19	16	1	2	1	Carbamidomethylation; Acetylation (Protein N-term)	40798	Protein NDRG2 OS=Homo sapiens OX=9606 GN=NDRG2 PE=1 SV=2
362	443	Q92911|SC5A5_HUMAN	24970	34742	23895	18262	19429	11720	19	19	37	36	29	15	16	14	Carbamidomethylation; Acetylation (Protein N-term)	68666	Sodium/iodide cotransporter OS=Homo sapiens OX=9606 GN=SLC5A5 PE=1 SV=1
858	627	P10768|ESTD_HUMAN				4671.7	5245.6	3199.2	9	9	0	0	0	11	10	8	Carbamidomethylation	31463	S-formylglutathione hydrolase OS=Homo sapiens OX=9606 GN=ESD PE=1 SV=2
633	272	Q14112|NID2_HUMAN	3307.2	6797.1	2067.5	578.61	1388.9	552.76	18	18	19	20	13	1	2	1	Carbamidomethylation	151254	Nidogen-2 OS=Homo sapiens OX=9606 GN=NID2 PE=1 SV=3
373	694	A0A0B4J1X8|HV343_HUMAN				4485.1	4809	3915	14	2	10	11	8	34	43	32	Carbamidomethylation	13077	Immunoglobulin heavy variable 3-43 OS=Homo sapiens OX=9606 GN=IGHV3-43 PE=3 SV=1
800	492	O95897|NOE2_HUMAN		175.73	116.17	6730.2	8461.5	5692.6	12	12	0	1	1	8	17	7	Carbamidomethylation	51386	Noelin-2 OS=Homo sapiens OX=9606 GN=OLFM2 PE=1 SV=2
545	519	P05026|AT1B1_HUMAN	3871.5	5249.5	3257.1	14384	14828	22058	11	11	8	14	9	11	16	18	Carbamidomethylation	35061	Sodium/potassium-transporting ATPase subunit beta-1 OS=Homo sapiens OX=9606 GN=ATP1B1 PE=1 SV=1
527	397	P14314|GLU2B_HUMAN	7175.3	9821.1	6284.1	7267.6	16252	13572	16	16	15	18	13	7	14	13	Carbamidomethylation	59426	Glucosidase 2 subunit beta OS=Homo sapiens OX=9606 GN=PRKCSH PE=1 SV=2
718	786	Q9BYJ0|FGFP2_HUMAN				10303	10714	6161.8	9	9	0	0	0	18	14	13	Carbamidomethylation	24581	Fibroblast growth factor-binding protein 2 OS=Homo sapiens OX=9606 GN=FGFBP2 PE=1 SV=1
356	720	P06307|CCKN_HUMAN	123610	124040	89720	97091	109400	57764	17	17	30	29	21	23	27	20	Oxidation (M)	12669	Cholecystokinin OS=Homo sapiens OX=9606 GN=CCK PE=1 SV=1
766	545	P05997|CO5A2_HUMAN				3202.7	4756.3	3172.5	10	10	0	0	0	13	10	14	Carbamidomethylation; Oxidation (M)	144910	Collagen alpha-2(V) chain OS=Homo sapiens OX=9606 GN=COL5A2 PE=1 SV=3
608	388	Q9H8L6|MMRN2_HUMAN	5709.4	7118.4	4142.4	21046	22649	14505	14	14	11	9	14	9	8	10	Carbamidomethylation	104409	Multimerin-2 OS=Homo sapiens OX=9606 GN=MMRN2 PE=1 SV=2
755	371	Q96PX8|SLIK1_HUMAN	2154.3	4152.1	1600.6	2163.7	903.07	5970.5	17	16	13	8	8	5	3	2	Carbamidomethylation	77735	SLIT and NTRK-like protein 1 OS=Homo sapiens OX=9606 GN=SLITRK1 PE=1 SV=2
542	436	Q9H3G5|CPVL_HUMAN	871.19	2056.1	885.24	11005	13048	10336	13	13	11	7	8	16	19	15	Carbamidomethylation	54164	Probable serine carboxypeptidase CPVL OS=Homo sapiens OX=9606 GN=CPVL PE=1 SV=2
729	398	Q14697|GANAB_HUMAN	127.75	506.67	525.58	2436.8	1356.7	305.42	12	12	6	9	11	7	5	4	Carbamidomethylation	106874	Neutral alpha-glucosidase AB OS=Homo sapiens OX=9606 GN=GANAB PE=1 SV=3
417	335	Q5T749|KPRP_HUMAN	8782.2	6383.2	3566.3	19731	26021	14981	18	18	16	19	12	21	29	17	Carbamidomethylation	64136	Keratinocyte proline-rich protein OS=Homo sapiens OX=9606 GN=KPRP PE=1 SV=1
386	989	P01717|LV325_HUMAN	0	297.81	0	5184.8	4549.8	3476.3	11	1	11	12	11	31	37	32	Carbamidomethylation	12011	Immunoglobulin lambda variable 3-25 OS=Homo sapiens OX=9606 GN=IGLV3-25 PE=1 SV=2
846	467	O15232|MATN3_HUMAN	303.4	429.44	346.27	4332.7	5407.3	3462.4	11	11	2	2	1	8	7	10	Carbamidomethylation	52817	Matrilin-3 OS=Homo sapiens OX=9606 GN=MATN3 PE=1 SV=2
847	582	P43251|BTD_HUMAN	5670.1	4332.9	2560.7				9	9	12	9	9	0	0	0	Carbamidomethylation	61133	Biotinidase OS=Homo sapiens OX=9606 GN=BTD PE=1 SV=2
790	438	Q8WUM4|PDC6I_HUMAN		425.63		4816.2	2673.3	3644.8	11	11	0	4	0	12	7	12	Carbamidomethylation	96023	Programmed cell death 6-interacting protein OS=Homo sapiens OX=9606 GN=PDCD6IP PE=1 SV=1
740	505	P00505|AATM_HUMAN				5872.4	5993.7	5564.9	10	10	0	0	0	14	14	13	Carbamidomethylation	47518	Aspartate aminotransferase mitochondrial OS=Homo sapiens OX=9606 GN=GOT2 PE=1 SV=3
645	441	P14923|PLAK_HUMAN	1531.9	1305.5	1486	6889.6	6550.1	4955.2	11	11	8	6	6	11	12	11	Oxidation (M)	81745	Junction plakoglobin OS=Homo sapiens OX=9606 GN=JUP PE=1 SV=3
619	489	Q8IWU5|SULF2_HUMAN	3519.7	3586	3051.2	5150.1	2353	3569.2	10	10	8	7	9	10	12	13	Carbamidomethylation; Acetylation (Protein N-term)	100455	Extracellular sulfatase Sulf-2 OS=Homo sapiens OX=9606 GN=SULF2 PE=1 SV=1
801	390	Q16394|EXT1_HUMAN				3126.1	4583	3785.7	14	13	0	0	0	9	11	14	Carbamidomethylation	86255	Exostosin-1 OS=Homo sapiens OX=9606 GN=EXT1 PE=1 SV=2
715	552	Q13508|NAR3_HUMAN	3190.1	3406.7	1814.3	1008.1	672.19	833.22	9	9	14	12	9	5	2	3	Carbamidomethylation	43923	Ecto-ADP-ribosyltransferase 3 OS=Homo sapiens OX=9606 GN=ART3 PE=1 SV=2
601	529	Q9Y279|VSIG4_HUMAN	1022.4	616.58	452.19	11869	13957	9227.9	10	10	5	5	6	15	17	16	Carbamidomethylation	43987	V-set and immunoglobulin domain-containing protein 4 OS=Homo sapiens OX=9606 GN=VSIG4 PE=1 SV=1
651	544	Q9BXJ0|C1QT5_HUMAN	1472.5	2671.2	1049.3	22947	25937	20471	12	12	5	9	4	11	11	14	Carbamidomethylation	25298	Complement C1q tumor necrosis factor-related protein 5 OS=Homo sapiens OX=9606 GN=C1QTNF5 PE=1 SV=1
495	534	P78324|SHPS1_HUMAN		0	0	739.42	206.8	414.4	10	3	13	15	17	16	14	13	Carbamidomethylation	54967	Tyrosine-protein phosphatase non-receptor type substrate 1 OS=Homo sapiens OX=9606 GN=SIRPA PE=1 SV=2
652	642	P30041|PRDX6_HUMAN	1856.5	3345.5	1238.3	4939.2	6187.4	3830.1	10	10	6	11	8	9	11	9	Carbamidomethylation	25035	Peroxiredoxin-6 OS=Homo sapiens OX=9606 GN=PRDX6 PE=1 SV=3
745	462	P61812|TGFB2_HUMAN	0		0	17297	8855.8	12973	13	13	1	0	1	16	9	13	Carbamidomethylation	47748	Transforming growth factor beta-2 proprotein OS=Homo sapiens OX=9606 GN=TGFB2 PE=1 SV=1
559	673	Q01469|FABP5_HUMAN	6446.6	7176.8	6214.6	22264	24160	17922	10	10	12	11	9	15	13	14	Carbamidomethylation; Oxidation (M); Acetylation (Protein N-term)	15164	Fatty acid-binding protein 5 OS=Homo sapiens OX=9606 GN=FABP5 PE=1 SV=3
681	593	Q9BRK5|CAB45_HUMAN	3729.8	8933.6	3892.2		883.44		11	11	10	22	15	0	3	0		41807	45 kDa calcium-binding protein OS=Homo sapiens OX=9606 GN=SDF4 PE=1 SV=1
202	683	P05109|S10A8_HUMAN	21812	11991	13769	23092	22548	25084	12	12	70	36	55	47	31	42	Carbamidomethylation	10835	Protein S100-A8 OS=Homo sapiens OX=9606 GN=S100A8 PE=1 SV=1
699	384	Q08397|LOXL1_HUMAN	3437.5	5882.2	3262.9	1286.5	1204.1	903.42	13	13	15	15	10	3	2	2	Carbamidomethylation	63110	Lysyl oxidase homolog 1 OS=Homo sapiens OX=9606 GN=LOXL1 PE=1 SV=2
563	1309	P01721|LV657_HUMAN				26690	41278	18544	10	7	0	1	0	22	34	16	Acetylation (Protein N-term)	12566	Immunoglobulin lambda variable 6-57 OS=Homo sapiens OX=9606 GN=IGLV6-57 PE=1 SV=2
778	561	P37802|TAGL2_HUMAN	1279.7	944.7	539.87	5280.6	6729	6280.2	10	10	3	5	2	7	10	9	Carbamidomethylation; Acetylation (Protein N-term)	22391	Transgelin-2 OS=Homo sapiens OX=9606 GN=TAGLN2 PE=1 SV=3
416	1127	P01703|LV140_HUMAN				42005	48138	28266	16	7	2	2	2	36	38	34	Acetylation (Protein N-term)	12302	Immunoglobulin lambda variable 1-40 OS=Homo sapiens OX=9606 GN=IGLV1-40 PE=1 SV=2
228	963	P04430|KV116_HUMAN				419.27		264.17	15	1	4	9	5	60	81	91	Carbamidomethylation; Oxidation (M)	12618	Immunoglobulin kappa variable 1-16 OS=Homo sapiens OX=9606 GN=IGKV1-16 PE=1 SV=2
812	910	P04278|SHBG_HUMAN	2969.2	2829.4	925.82		0		6	6	11	12	9	0	1	0		43779	Sex hormone-binding globulin OS=Homo sapiens OX=9606 GN=SHBG PE=1 SV=2
811	604	P04083|ANXA1_HUMAN	1104.3	1060	1073	2028.6	1232.3	595.63	8	8	6	4	5	9	6	3	Carbamidomethylation	38714	Annexin A1 OS=Homo sapiens OX=9606 GN=ANXA1 PE=1 SV=2
571	583	O76061|STC2_HUMAN	0	0	0	21360	22951	16844	11	11	2	1	1	24	21	23	Carbamidomethylation	33249	Stanniocalcin-2 OS=Homo sapiens OX=9606 GN=STC2 PE=1 SV=1
698	608	Q15084|PDIA6_HUMAN	138.42	239.66	0	8999.3	8698.8	5831.2	10	10	4	4	2	16	10	11		48121	Protein disulfide-isomerase A6 OS=Homo sapiens OX=9606 GN=PDIA6 PE=1 SV=1
974	559	Q92752|TENR_HUMAN	609.8	955.54	255.05	943.73	1009.4	944.29	9	9	2	3	6	3	4	2		149561	Tenascin-R OS=Homo sapiens OX=9606 GN=TNR PE=1 SV=3
894	654	Q14162|SREC_HUMAN				2379.5	2873.8	935.81	7	7	0	0	0	8	11	6	Carbamidomethylation	87387	Scavenger receptor class F member 1 OS=Homo sapiens OX=9606 GN=SCARF1 PE=1 SV=3
415	687	Q562R1|ACTBL_HUMAN				0	0	89.917	9	1	15	20	15	24	20	21	Carbamidomethylation; Oxidation (M)	42003	Beta-actin-like protein 2 OS=Homo sapiens OX=9606 GN=ACTBL2 PE=1 SV=2
716	418	P05062|ALDOB_HUMAN				5938.8	5301.9	5048.6	12	9	1	1	2	14	15	12	Carbamidomethylation; Acetylation (Protein N-term)	39473	Fructose-bisphosphate aldolase B OS=Homo sapiens OX=9606 GN=ALDOB PE=1 SV=2
648	377	O43405|COCH_HUMAN	673.73	362.74	497.78	13831	13170	8249.4	16	16	2	1	2	20	14	15	Carbamidomethylation	59483	Cochlin OS=Homo sapiens OX=9606 GN=COCH PE=1 SV=1
513	594	P23083|HV102_HUMAN				10840	8640	7862	14	4	2	1	1	27	32	20	Carbamidomethylation	13085	Immunoglobulin heavy variable 1-2 OS=Homo sapiens OX=9606 GN=IGHV1-2 PE=1 SV=2
887	685	Q13444|ADA15_HUMAN	1792.8	2600.4	1611.5				7	7	7	8	11	0	0	0	Carbamidomethylation	92959	Disintegrin and metalloproteinase domain-containing protein 15 OS=Homo sapiens OX=9606 GN=ADAM15 PE=1 SV=4
501	734	P06702|S10A9_HUMAN	5516.9	5498.1	3710.7	26862	30105	18778	8	8	8	12	9	19	24	15	Oxidation (M)	13242	Protein S100-A9 OS=Homo sapiens OX=9606 GN=S100A9 PE=1 SV=1
844	614	Q92854|SEM4D_HUMAN				6368.9	7735	3651.9	8	8	0	0	0	9	13	8	Carbamidomethylation	96150	Semaphorin-4D OS=Homo sapiens OX=9606 GN=SEMA4D PE=1 SV=1
570	602	Q9BXJ4|C1QT3_HUMAN	3041.2	2813.7	1928.3	33837	36161	29356	10	10	10	6	6	14	18	18	Carbamidomethylation	26994	Complement C1q tumor necrosis factor-related protein 3 OS=Homo sapiens OX=9606 GN=C1QTNF3 PE=1 SV=1
535	615	Q96JF0|SIAT2_HUMAN	8488.4	8575.7	6774.7	25325	19929	13479	10	10	10	15	10	14	17	12		60158	Beta-galactoside alpha-2 6-sialyltransferase 2 OS=Homo sapiens OX=9606 GN=ST6GAL2 PE=1 SV=2
685	379	Q7Z7M9|GALT5_HUMAN	1153	519.62	1406.3	4196.5	6506.9	2751.2	13	12	6	7	7	8	11	10	Carbamidomethylation	106266	Polypeptide N-acetylgalactosaminyltransferase 5 OS=Homo sapiens OX=9606 GN=GALNT5 PE=1 SV=1
696	457	P29508|SPB3_HUMAN	0	589.99	0	7316.8	4246.8	2862.2	12	12	2	2	1	14	15	13	Oxidation (M)	44565	Serpin B3 OS=Homo sapiens OX=9606 GN=SERPINB3 PE=1 SV=2
659	898	Q16568|CART_HUMAN	8306.2	8714	7485.2	18148	17983	13177	7	7	6	9	5	11	12	10	Carbamidomethylation	12829	Cocaine- and amphetamine-regulated transcript protein OS=Homo sapiens OX=9606 GN=CARTPT PE=1 SV=1
587	508	P11362|FGFR1_HUMAN	3561.5	3715.5	2686.6	4927.4	3383.5	2030.1	11	10	16	11	14	10	11	6	Carbamidomethylation	91868	Fibroblast growth factor receptor 1 OS=Homo sapiens OX=9606 GN=FGFR1 PE=1 SV=3
605	709	P07737|PROF1_HUMAN	2849.9	2717.6	2486.6	4606.5	3831.4	3630.1	9	9	9	13	10	8	12	10	Carbamidomethylation; Acetylation (Protein N-term)	15054	Profilin-1 OS=Homo sapiens OX=9606 GN=PFN1 PE=1 SV=2
620	401	P49257|LMAN1_HUMAN	6157.8	12932	3949.2				13	13	19	27	13	0	0	0	Carbamidomethylation; Oxidation (M)	57549	Protein ERGIC-53 OS=Homo sapiens OX=9606 GN=LMAN1 PE=1 SV=2
705	501	Q9NQ36|SCUB2_HUMAN	0	0	0	3271.5	2099.7	1185.5	10	8	5	4	5	10	12	10	Carbamidomethylation	109957	Signal peptide CUB and EGF-like domain-containing protein 2 OS=Homo sapiens OX=9606 GN=SCUBE2 PE=1 SV=3
875	696	Q9BXJ3|C1QT4_HUMAN	735.6	1371.4	725.18	11672	17464	11244	10	10	1	1	1	4	12	8		35256	Complement C1q tumor necrosis factor-related protein 4 OS=Homo sapiens OX=9606 GN=C1QTNF4 PE=1 SV=2
714	524	Q96BZ4|PLD4_HUMAN	4830.4	5033.4	3255.7	1592.2	536.04	494.35	10	10	17	9	13	4	1	1	Carbamidomethylation	55626	Phospholipase D4 OS=Homo sapiens OX=9606 GN=PLD4 PE=2 SV=2
377	847	P01767|HV353_HUMAN				240.23	306.05		13	1	11	13	10	32	38	33	Carbamidomethylation	12770	Immunoglobulin heavy variable 3-53 OS=Homo sapiens OX=9606 GN=IGHV3-53 PE=1 SV=2
842	452	Q63HQ2|EGFLA_HUMAN				5335.5	6015.6	2824	11	11	0	0	0	11	11	8	Carbamidomethylation	111271	Pikachurin OS=Homo sapiens OX=9606 GN=EGFLAM PE=1 SV=2
341	1028	A0A087WSY4|HV432_HUMAN				3836.3	4774.7	3141.8	12	1	5	5	3	50	47	50	Carbamidomethylation	13025	Immunoglobulin heavy variable 4-30-2 OS=Homo sapiens OX=9606 GN=IGHV4-30-2 PE=3 SV=1
701	585	P62879|GBB2_HUMAN	238.62	639.97	303.5				9	4	12	14	15	3	2	1	Carbamidomethylation	37331	Guanine nucleotide-binding protein G(I)/G(S)/G(T) subunit beta-2 OS=Homo sapiens OX=9606 GN=GNB2 PE=1 SV=3
616	863	P02655|APOC2_HUMAN	36029	35733	30356	792.8	704.85	222.72	7	7	16	18	19	3	2	2	Oxidation (M)	11284	Apolipoprotein C-II OS=Homo sapiens OX=9606 GN=APOC2 PE=1 SV=1
539	754	A0A0C4DH29|HV103_HUMAN				2208.7	2931.1	2773.8	12	2	1	1	1	31	24	19	Carbamidomethylation	13008	Immunoglobulin heavy variable 1-3 OS=Homo sapiens OX=9606 GN=IGHV1-3 PE=3 SV=1
615	1137	P02656|APOC3_HUMAN	51930	68564	51625	11077	13971	7886	6	6	13	18	15	3	5	6	Oxidation (M)	10852	Apolipoprotein C-III OS=Homo sapiens OX=9606 GN=APOC3 PE=1 SV=1
822	572	O95185|UNC5C_HUMAN				5926.8	4332.4	4812.4	9	9	0	0	0	12	11	9	Carbamidomethylation	103146	Netrin receptor UNC5C OS=Homo sapiens OX=9606 GN=UNC5C PE=1 SV=2
593	805	P14138|EDN3_HUMAN	1326.4	2131.3	620.25	15755	18769	16718	7	7	10	10	7	14	12	14	Carbamidomethylation	25454	Endothelin-3 OS=Homo sapiens OX=9606 GN=EDN3 PE=1 SV=1
352	804	A0A0A0MS15|HV349_HUMAN				19694	18417	16718	11	3	9	9	7	45	44	38	Carbamidomethylation	13056	Immunoglobulin heavy variable 3-49 OS=Homo sapiens OX=9606 GN=IGHV3-49 PE=3 SV=1
753	573	Q16555|DPYL2_HUMAN	0	0	50.285	2343.6	3665	3565.5	9	7	5	2	4	8	9	11	Carbamidomethylation	62294	Dihydropyrimidinase-related protein 2 OS=Homo sapiens OX=9606 GN=DPYSL2 PE=1 SV=1
817	610	P02462|CO4A1_HUMAN				10240	13108	7396.5	10	10	0	0	0	9	15	8	Carbamidomethylation; Acetylation (Protein N-term)	160611	Collagen alpha-1(IV) chain OS=Homo sapiens OX=9606 GN=COL4A1 PE=1 SV=4
744	1122	A0A0C4DH67|KV108_HUMAN					120.49		10	1	2	1	1	12	15	9	Carbamidomethylation	12537	Immunoglobulin kappa variable 1-8 OS=Homo sapiens OX=9606 GN=IGKV1-8 PE=3 SV=1
722	331	P07900|HS90A_HUMAN				4508.3	3276.3	2301.8	14	8	0	1	2	16	12	12	Carbamidomethylation	84660	Heat shock protein HSP 90-alpha OS=Homo sapiens OX=9606 GN=HSP90AA1 PE=1 SV=5
834	625	Q9Y696|CLIC4_HUMAN	0	164.86	0	5928.2	6009.8	4676.2	8	8	1	3	1	9	10	7	Carbamidomethylation	28772	Chloride intracellular channel protein 4 OS=Homo sapiens OX=9606 GN=CLIC4 PE=1 SV=4
922	609	P22392|NDKB_HUMAN				1285	1373	737.39	9	5	0	0	0	7	8	9	Carbamidomethylation	17298	Nucleoside diphosphate kinase B OS=Homo sapiens OX=9606 GN=NME2 PE=1 SV=1
697	526	P63104|1433Z_HUMAN	605.89	179040	165420	329.8	722.32	232.31	10	7	19	11	10	2	4	1	Carbamidomethylation	27745	14-3-3 protein zeta/delta OS=Homo sapiens OX=9606 GN=YWHAZ PE=1 SV=1
614	967	Q9H2A7|CXL16_HUMAN	7754.5	8216.8	5535.6	8461.4	8805.7	6000.8	7	7	10	12	10	9	9	10	Carbamidomethylation	27579	C-X-C motif chemokine 16 OS=Homo sapiens OX=9606 GN=CXCL16 PE=2 SV=4
941	637	P01236|PRL_HUMAN				7165.1	5828.4	6024.7	8	8	0	0	0	10	5	8	Carbamidomethylation	25876	Prolactin OS=Homo sapiens OX=9606 GN=PRL PE=1 SV=1
623	1005	P21926|CD9_HUMAN	1370.5	684.11	1314.2	21796	22929	16696	8	8	9	10	5	9	14	12	Carbamidomethylation	25416	CD9 antigen OS=Homo sapiens OX=9606 GN=CD9 PE=1 SV=4
580	395	Q86X29|LSR_HUMAN	401.66	322.3	146.29	11943	15667	11024	14	14	8	9	5	14	18	16		71439	Lipolysis-stimulated lipoprotein receptor OS=Homo sapiens OX=9606 GN=LSR PE=1 SV=4
876	925	Q9NYX4|CALY_HUMAN	1898.5	1990	1729.1	34369	2747.1	2164.9	8	8	4	4	5	5	4	5	Carbamidomethylation	23434	Neuron-specific vesicular protein calcyon OS=Homo sapiens OX=9606 GN=CALY PE=1 SV=1
780	711	O43240|KLK10_HUMAN				3922.7	4897.9	2983.9	8	8	0	0	0	12	16	8	Carbamidomethylation	30170	Kallikrein-10 OS=Homo sapiens OX=9606 GN=KLK10 PE=1 SV=3
793	555	P28799|GRN_HUMAN			0	12399	8488.5	5551.1	10	10	0	0	1	13	13	8	Carbamidomethylation	63545	Progranulin OS=Homo sapiens OX=9606 GN=GRN PE=1 SV=2
805	725	Q99727|TIMP4_HUMAN		520.76	264.3	7396.3	8279.1	4099.8	8	8	0	4	1	12	10	7	Carbamidomethylation	25503	Metalloproteinase inhibitor 4 OS=Homo sapiens OX=9606 GN=TIMP4 PE=2 SV=1
898	965	Q8TEA8|DTD1_HUMAN				4507.1	2916.8	1676.2	5	5	0	0	0	8	8	8	Carbamidomethylation	23424	D-aminoacyl-tRNA deacylase 1 OS=Homo sapiens OX=9606 GN=DTD1 PE=1 SV=2
945	412	Q07954|LRP1_HUMAN	138.56	518.13	0	0	134.71	0	12	12	5	6	3	2	3	3	Carbamidomethylation	504610	Prolow-density lipoprotein receptor-related protein 1 OS=Homo sapiens OX=9606 GN=LRP1 PE=1 SV=2
596	566	P21802|FGFR2_HUMAN	3315.6	3202.7	1781.3	13959	12306	11165	10	8	6	9	7	11	13	18	Carbamidomethylation	92025	Fibroblast growth factor receptor 2 OS=Homo sapiens OX=9606 GN=FGFR2 PE=1 SV=1
592	728	Q15517|CDSN_HUMAN	4082.3	7519.3	3479.9	15513	15971	11658	11	11	13	13	9	11	10	11	Carbamidomethylation	51522	Corneodesmosin OS=Homo sapiens OX=9606 GN=CDSN PE=1 SV=3
899	870	P55083|MFAP4_HUMAN	7308.9	6883.7	4599	540.48	615.25	300.46	7	7	7	8	7	1	1	1	Carbamidomethylation; Oxidation (M)	28648	Microfibril-associated glycoprotein 4 OS=Homo sapiens OX=9606 GN=MFAP4 PE=1 SV=2
528	1288	P01706|LV211_HUMAN		0	0	9214.5	9290.4	8669.2	11	2	3	3	3	21	23	27	Carbamidomethylation	12644	Immunoglobulin lambda variable 2-11 OS=Homo sapiens OX=9606 GN=IGLV2-11 PE=1 SV=2
706	486	O14672|ADA10_HUMAN	7510.2	10103	5728.3	399.52	1141.8	719.25	11	11	12	10	19	1	3	1	Carbamidomethylation	84142	Disintegrin and metalloproteinase domain-containing protein 10 OS=Homo sapiens OX=9606 GN=ADAM10 PE=1 SV=1
883	883	Q9UHI8|ATS1_HUMAN	7304.4	7331.7	5728.8				6	6	11	7	8	0	0	0	Carbamidomethylation	105358	A disintegrin and metalloproteinase with thrombospondin motifs 1 OS=Homo sapiens OX=9606 GN=ADAMTS1 PE=1 SV=4
725	562	P40121|CAPG_HUMAN	0	98.771	0	9768.8	12999	7879.5	10	10	1	1	1	13	13	14	Carbamidomethylation	38499	Macrophage-capping protein OS=Homo sapiens OX=9606 GN=CAPG PE=1 SV=2
851	715	P21291|CSRP1_HUMAN	0			3897.3	4263.2	2784.3	7	7	1	0	0	6	9	14	Carbamidomethylation	20567	Cysteine and glycine-rich protein 1 OS=Homo sapiens OX=9606 GN=CSRP1 PE=1 SV=3
440	795	A0A0J9YXX1|HV5X1_HUMAN	563.23	663	0	33425	33811	35922	13	5	7	4	7	26	29	30	Carbamidomethylation; Acetylation (Protein N-term)	12773	Immunoglobulin heavy variable 5-10-1 OS=Homo sapiens OX=9606 GN=IGHV5-10-1 PE=3 SV=1
427	839	Q96NZ9|PRAP1_HUMAN	14827	22151	10772	45615	51187	40681	9	9	17	19	13	24	16	20		17208	Proline-rich acidic protein 1 OS=Homo sapiens OX=9606 GN=PRAP1 PE=1 SV=2
396	856	A0A0B4J1V6|HV373_HUMAN	171.41			22154	23029	18590	13	5	9	8	6	38	32	34	Carbamidomethylation; Oxidation (M); Acetylation (Protein N-term)	12858	Immunoglobulin heavy variable 3-73 OS=Homo sapiens OX=9606 GN=IGHV3-73 PE=3 SV=1
569	346	Q6UXD5|SE6L2_HUMAN	5182.7	8408	5834.9				14	13	19	26	17	3	3	4	Carbamidomethylation	97560	Seizure 6-like protein 2 OS=Homo sapiens OX=9606 GN=SEZ6L2 PE=1 SV=2
552	567	P32119|PRDX2_HUMAN	4971.6	6156.6	3398.8	9118.6	9194.5	9645.7	12	11	12	11	12	10	14	16	Carbamidomethylation	21892	Peroxiredoxin-2 OS=Homo sapiens OX=9606 GN=PRDX2 PE=1 SV=5
810	503	O00292|LFTY2_HUMAN	759.93	1671.9	908.94	1100.8	1193.1	353.27	10	10	6	8	7	2	6	4	Carbamidomethylation	40920	Left-right determination factor 2 OS=Homo sapiens OX=9606 GN=LEFTY2 PE=1 SV=2
671	971	A0A0C4DH43|HV70D_HUMAN				9293.1	9174.4	9930.3	10	5	0	1	0	16	13	21	Carbamidomethylation	13312	Immunoglobulin heavy variable 2-70D OS=Homo sapiens OX=9606 GN=IGHV2-70D PE=3 SV=1
703	1131	P14209|CD99_HUMAN	9689.2	12118	10888	926.93	908.72	793.07	10	10	17	13	13	1	2	1		18848	CD99 antigen OS=Homo sapiens OX=9606 GN=CD99 PE=1 SV=1
864	550	P08581|MET_HUMAN				4623.1	5460.3	2786.6	9	9	0	0	0	7	12	9	Carbamidomethylation	155541	Hepatocyte growth factor receptor OS=Homo sapiens OX=9606 GN=MET PE=1 SV=4
711	440	P04899|GNAI2_HUMAN	4087.1	4852.2	2223.8		790.99	0	12	12	15	14	13	0	2	2	Carbamidomethylation	40451	Guanine nucleotide-binding protein G(i) subunit alpha-2 OS=Homo sapiens OX=9606 GN=GNAI2 PE=1 SV=3
349	850	A0A0C4DH42|HV366_HUMAN	5118.1	10423	292.98	163810	132330	120040	12	2	13	14	11	34	46	34	Carbamidomethylation	12698	Immunoglobulin heavy variable 3-66 OS=Homo sapiens OX=9606 GN=IGHV3-66 PE=3 SV=1
702	586	P16152|CBR1_HUMAN	1061.8	1352.6	738.46	11260	10280	7411.6	9	9	4	9	4	9	10	11	Carbamidomethylation; Acetylation (Protein N-term)	30375	Carbonyl reductase [NADPH] 1 OS=Homo sapiens OX=9606 GN=CBR1 PE=1 SV=3
546	1194	P01709|LV208_HUMAN		0			0		11	1	3	3	2	19	22	27		12382	Immunoglobulin lambda variable 2-8 OS=Homo sapiens OX=9606 GN=IGLV2-8 PE=1 SV=2
776	456	Q86SF2|GALT7_HUMAN	2020.1	2645.4	1515.1				11	11	12	12	12	0	0	0	Carbamidomethylation	75389	N-acetylgalactosaminyltransferase 7 OS=Homo sapiens OX=9606 GN=GALNT7 PE=1 SV=1
672	1144	O60888|CUTA_HUMAN	30209	28117	21861	0			5	5	18	16	16	1	0	0	Carbamidomethylation	19116	Protein CutA OS=Homo sapiens OX=9606 GN=CUTA PE=1 SV=2
537	1142	P01718|LV327_HUMAN	136.77	436.8	232.24	23690	26966	18509	9	4	6	7	6	16	22	21	Carbamidomethylation	12165	Immunoglobulin lambda variable 3-27 OS=Homo sapiens OX=9606 GN=IGLV3-27 PE=1 SV=2
522	701	Q5TFQ8|SIRBL_HUMAN				0			8	1	13	14	16	14	13	11	Carbamidomethylation	43359	Signal-regulatory protein beta-1 isoform 3 OS=Homo sapiens OX=9606 GN=SIRPB1 PE=1 SV=1
905	638	Q9NT22|EMIL3_HUMAN	150.95	596.31	0	1405.1	1175.2	240.15	8	8	5	4	3	7	4	2	Carbamidomethylation	82647	EMILIN-3 OS=Homo sapiens OX=9606 GN=EMILIN3 PE=1 SV=2
820	902	O60911|CATL2_HUMAN				1029.2	672.75	708	7	4	0	0	0	8	11	13	Carbamidomethylation	37329	Cathepsin L2 OS=Homo sapiens OX=9606 GN=CTSV PE=1 SV=2
931	842	O60613|SEP15_HUMAN	4845.3	4974.2	2942.5	514.06			7	7	7	8	7	1	0	0	Carbamidomethylation	18092	Selenoprotein F OS=Homo sapiens OX=9606 GN=SELENOF PE=1 SV=4
734	1298	Q96FJ2|DYL2_HUMAN	336.09	0	0	2378.9	4156.9	1295	4	1	8	6	7	5	8	8	Carbamidomethylation	10350	Dynein light chain 2 cytoplasmic OS=Homo sapiens OX=9606 GN=DYNLL2 PE=1 SV=1
642	955	Q8N3H0|TAFA2_HUMAN	327.57	1053.9	333.26	31332	29641	26343	5	5	2	5	4	14	13	17	Carbamidomethylation	14620	Chemokine-like protein TAFA-2 OS=Homo sapiens OX=9606 GN=TAFA2 PE=2 SV=1
882	748	P09211|GSTP1_HUMAN	9949.2	11307	8311.3		308.2		8	8	12	8	6	0	1	0	Carbamidomethylation	23356	Glutathione S-transferase P OS=Homo sapiens OX=9606 GN=GSTP1 PE=1 SV=2
541	1119	P01701|LV151_HUMAN	2806.2	3133.4	0	39807	54581	47382	12	7	1	5	4	24	23	20	Carbamidomethylation	12249	Immunoglobulin lambda variable 1-51 OS=Homo sapiens OX=9606 GN=IGLV1-51 PE=1 SV=2
769	569	P05160|F13B_HUMAN	1509.3	1447.4	893.6	0	0		9	9	13	12	10	1	1	0	Carbamidomethylation	75511	Coagulation factor XIII B chain OS=Homo sapiens OX=9606 GN=F13B PE=1 SV=3
782	719	Q9BXJ1|C1QT1_HUMAN		0		11524	15400	13749	8	8	0	1	0	14	9	12		31743	Complement C1q tumor necrosis factor-related protein 1 OS=Homo sapiens OX=9606 GN=C1QTNF1 PE=1 SV=1
878	739	O94766|B3GA3_HUMAN				5876.8	6495	2315.3	9	9	0	0	0	9	14	4		37122	Galactosylgalactosylxylosylprotein 3-beta-glucuronosyltransferase 3 OS=Homo sapiens OX=9606 GN=B3GAT3 PE=1 SV=2
761	664	Q9Y653|AGRG1_HUMAN	142.74	422.63	0	6912.8	6491.2	5237.9	7	7	1	4	2	10	12	9	Carbamidomethylation	77738	Adhesion G-protein coupled receptor G1 OS=Homo sapiens OX=9606 GN=ADGRG1 PE=1 SV=2
590	648	P22352|GPX3_HUMAN	37272	38543	29160	6657.9	6956.2	5016.4	10	10	17	18	17	5	6	5	Carbamidomethylation	25552	Glutathione peroxidase 3 OS=Homo sapiens OX=9606 GN=GPX3 PE=1 SV=2
720	502	Q9UKU9|ANGL2_HUMAN	178.01	363.36	225.81	11241	7911.4	5098.8	9	8	3	2	3	12	14	9	Carbamidomethylation	57105	Angiopoietin-related protein 2 OS=Homo sapiens OX=9606 GN=ANGPTL2 PE=1 SV=1
726	425	Q9NSC7|SIA7A_HUMAN				5792.6	6224.8	3575.1	12	12	0	0	0	16	13	14	Carbamidomethylation	68564	Alpha-N-acetylgalactosaminide alpha-2 6-sialyltransferase 1 OS=Homo sapiens OX=9606 GN=ST6GALNAC1 PE=2 SV=1
756	496	P15291|B4GT1_HUMAN	9038.7	11081	7687.4		2116.7	507.46	12	12	13	11	8	0	5	2	Carbamidomethylation	43920	Beta-1 4-galactosyltransferase 1 OS=Homo sapiens OX=9606 GN=B4GALT1 PE=1 SV=5
735	708	Q9ULP0|NDRG4_HUMAN	2709.6	4935.4	2176.7	5096.5	8574.4	4853.6	8	8	9	7	6	5	8	7	Carbamidomethylation	38459	Protein NDRG4 OS=Homo sapiens OX=9606 GN=NDRG4 PE=1 SV=2
752	630	Q92626|PXDN_HUMAN	463.67	865.35	329.4	3242	4295.7	2710	9	9	7	7	5	7	8	5	Carbamidomethylation	165274	Peroxidasin homolog OS=Homo sapiens OX=9606 GN=PXDN PE=1 SV=2
519	1229	P61278|SMS_HUMAN	45442	40268	23373	33264	34652	18887	6	6	16	17	15	10	12	12	Oxidation (M)	12736	Somatostatin OS=Homo sapiens OX=9606 GN=SST PE=1 SV=1
682	1182	Q16777|H2A2C_HUMAN				0	0		6	2	11	9	5	11	8	6		13988	Histone H2A type 2-C OS=Homo sapiens OX=9606 GN=HIST2H2AC PE=1 SV=4
682	1183	Q6FI13|H2A2A_HUMAN				0	0		6	2	11	9	5	11	8	6		14095	Histone H2A type 2-A OS=Homo sapiens OX=9606 GN=HIST2H2AA3 PE=1 SV=3
777	491	P31146|COR1A_HUMAN	0	0	0	4314.2	4293.2	4155.1	11	11	1	3	2	10	11	9	Carbamidomethylation	51026	Coronin-1A OS=Homo sapiens OX=9606 GN=CORO1A PE=1 SV=4
730	455	P61981|1433G_HUMAN	669.92	658.03	279.39		173.35	0	11	7	18	13	6	1	3	1	Carbamidomethylation	28303	14-3-3 protein gamma OS=Homo sapiens OX=9606 GN=YWHAG PE=1 SV=2
792	406	Q9HBR0|S38AA_HUMAN	476.97	415.98	278.44	1382.9	1344	1671.8	12	12	4	4	2	11	7	7		119762	Putative sodium-coupled neutral amino acid transporter 10 OS=Homo sapiens OX=9606 GN=SLC38A10 PE=1 SV=2
787	1100	P62805|H4_HUMAN	2007.7	1734.5	1601.1	6096.9	5822.9	5387.2	10	10	6	8	6	6	6	4		11367	Histone H4 OS=Homo sapiens OX=9606 GN=HIST1H4A PE=1 SV=2
947	494	Q9BXX0|EMIL2_HUMAN				237.05	1648	1179.6	11	11	0	0	0	5	9	8	Carbamidomethylation	115687	EMILIN-2 OS=Homo sapiens OX=9606 GN=EMILIN2 PE=1 SV=3
911	704	O95206|PCDH8_HUMAN	3408.8	1393.6	1375.8				7	7	10	9	5	0	0	0	Carbamidomethylation	113018	Protocadherin-8 OS=Homo sapiens OX=9606 GN=PCDH8 PE=2 SV=2
795	634	Q15768|EFNB3_HUMAN	0	0	0	11813	13325	8653.1	7	7	2	2	4	10	10	7	Carbamidomethylation	35835	Ephrin-B3 OS=Homo sapiens OX=9606 GN=EFNB3 PE=1 SV=1
1002	807	P31150|GDIA_HUMAN			0				6	1	0	0	1	7	2	9	Carbamidomethylation	50583	Rab GDP dissociation inhibitor alpha OS=Homo sapiens OX=9606 GN=GDI1 PE=1 SV=2
544	923	A0A0B4J2D9|KVD13_HUMAN				13476	8769.3	8314.9	14	3	3	6	3	22	24	18	Carbamidomethylation	12569	Immunoglobulin kappa variable 1D-13 OS=Homo sapiens OX=9606 GN=IGKV1D-13 PE=3 SV=1
544	924	P0DP09|KV113_HUMAN				13476	8769.3	8314.9	14	3	3	6	3	22	24	18	Carbamidomethylation	12569	Immunoglobulin kappa variable 1-13 OS=Homo sapiens OX=9606 GN=IGKV1-13 PE=3 SV=1
110	896	P35030|TRY3_HUMAN	1351500	1312900	988970	1244600	1320800	1081600	18	16	97	110	90	91	99	73	Carbamidomethylation; Oxidation (M); Acetylation (Protein N-term)	32529	Trypsin-3 OS=Homo sapiens OX=9606 GN=PRSS3 PE=1 SV=2
915	697	P21741|MK_HUMAN				15103	14771	9064.5	9	9	0	0	0	7	10	7	Carbamidomethylation	15585	Midkine OS=Homo sapiens OX=9606 GN=MDK PE=1 SV=1
763	621	P06865|HEXA_HUMAN	2693.2	6671	1422				8	8	17	12	9	0	0	0		60703	Beta-hexosaminidase subunit alpha OS=Homo sapiens OX=9606 GN=HEXA PE=1 SV=2
1007	722	P10646|TFPI1_HUMAN	0	0	0	2228.9	2964	3118	7	7	1	1	1	2	6	8	Carbamidomethylation	35015	Tissue factor pathway inhibitor OS=Homo sapiens OX=9606 GN=TFPI PE=1 SV=1
786	1206	P06703|S10A6_HUMAN	561.19	1103.4	1101.2	8232.6	7773.4	6368.3	7	7	3	3	2	17	5	6	Carbamidomethylation; Acetylation (Protein N-term)	10180	Protein S100-A6 OS=Homo sapiens OX=9606 GN=S100A6 PE=1 SV=1
603	770	P01743|HV146_HUMAN				1524.3	0	2787.1	10	2	1	1	1	25	20	15	Carbamidomethylation	12933	Immunoglobulin heavy variable 1-46 OS=Homo sapiens OX=9606 GN=IGHV1-46 PE=1 SV=2
813	659	P01213|PDYN_HUMAN	9157.2	8351.5	9427				9	9	11	9	13	0	0	0	Carbamidomethylation	28385	Proenkephalin-B OS=Homo sapiens OX=9606 GN=PDYN PE=1 SV=1
779	646	P10619|PPGB_HUMAN	2533.3	3370.5	1882.1	3244.8	2972.7	1724.6	8	8	8	8	7	6	4	3	Carbamidomethylation	54466	Lysosomal protective protein OS=Homo sapiens OX=9606 GN=CTSA PE=1 SV=2
814	1735	A0A087WSZ0|KVD08_HUMAN				174.91			8	1	2	1	1	10	11	8		12837	Immunoglobulin kappa variable 1D-8 OS=Homo sapiens OX=9606 GN=IGKV1D-8 PE=3 SV=6
762	631	Q5FWE3|PRRT3_HUMAN	5580.4	3468.1	3463.1	1416.2	2297.5	965.64	8	8	9	13	8	4	2	2		102197	Proline-rich transmembrane protein 3 OS=Homo sapiens OX=9606 GN=PRRT3 PE=1 SV=3
823	780	Q8WVQ1|CANT1_HUMAN	638.79	1281.5	500.77	410.78	503.47	400.46	6	6	10	8	8	1	1	4		44840	Soluble calcium-activated nucleotidase 1 OS=Homo sapiens OX=9606 GN=CANT1 PE=1 SV=1
694	577	P54652|HSP72_HUMAN		0					10	1	8	9	7	7	10	6		70021	Heat shock-related 70 kDa protein 2 OS=Homo sapiens OX=9606 GN=HSPA2 PE=1 SV=1
664	1026	Q8IZA0|K319L_HUMAN	2818.8	6281.2	1940.7	7411.9	9509.8	6336.8	6	6	8	9	8	7	13	7	Carbamidomethylation	115658	Dyslexia-associated protein KIAA0319-like protein OS=Homo sapiens OX=9606 GN=KIAA0319L PE=1 SV=2
775	769	Q8IW52|SLIK4_HUMAN	2210.1	2691.8	1556.9	5244.6	4316.6	2439.5	6	6	9	6	5	7	4	5	Carbamidomethylation	94331	SLIT and NTRK-like protein 4 OS=Homo sapiens OX=9606 GN=SLITRK4 PE=1 SV=1
518	1013	P80748|LV321_HUMAN			781.63	51609	82032	52292	6	3	7	5	4	20	27	19	Carbamidomethylation	12446	Immunoglobulin lambda variable 3-21 OS=Homo sapiens OX=9606 GN=IGLV3-21 PE=1 SV=2
1056	690	Q9H156|SLIK2_HUMAN				4401	3463.6	3443.2	7	5	2	0	0	4	4	6	Carbamidomethylation	95404	SLIT and NTRK-like protein 2 OS=Homo sapiens OX=9606 GN=SLITRK2 PE=1 SV=1
724	536	Q08174|PCDH1_HUMAN	6309.1	5880.7	3021.2				10	10	17	11	15	0	0	0		114743	Protocadherin-1 OS=Homo sapiens OX=9606 GN=PCDH1 PE=1 SV=2
742	497	Q7LFX5|CHSTF_HUMAN	1504.5	2003	1674.9	1780.2	1616.5	1170.9	10	10	7	10	9	9	3	3		64926	Carbohydrate sulfotransferase 15 OS=Homo sapiens OX=9606 GN=CHST15 PE=1 SV=1
760	493	P08238|HS90B_HUMAN	153300			123.73	0		12	4	3	2	5	9	11	8	Carbamidomethylation	83264	Heat shock protein HSP 90-beta OS=Homo sapiens OX=9606 GN=HSP90AB1 PE=1 SV=4
950	957	P14151|LYAM1_HUMAN				38563	48488	38732	6	6	0	0	0	7	8	7	Carbamidomethylation	42187	L-selectin OS=Homo sapiens OX=9606 GN=SELL PE=1 SV=2
796	679	P09603|CSF1_HUMAN	8637.7	8632.4	7090.1				9	9	12	10	13	0	0	0	Carbamidomethylation	60179	Macrophage colony-stimulating factor 1 OS=Homo sapiens OX=9606 GN=CSF1 PE=1 SV=2
870	853	A6NLU5|VTM2B_HUMAN	2892	6038.7	1319.3				8	8	8	10	10	0	0	0	Carbamidomethylation	30297	V-set and transmembrane domain-containing protein 2B OS=Homo sapiens OX=9606 GN=VSTM2B PE=3 SV=2
572	612	P60174|TPIS_HUMAN	2529.6	3257.6	1812.8	4382.1	4876.9	1411.2	8	8	13	16	11	11	14	7	Carbamidomethylation	30791	Triosephosphate isomerase OS=Homo sapiens OX=9606 GN=TPI1 PE=1 SV=3
964	823	Q96HF1|SFRP2_HUMAN	1309.3	1592.7	1013.1	2852.5	1734.8	2250.6	6	6	4	4	3	4	3	3	Carbamidomethylation	33490	Secreted frizzled-related protein 2 OS=Homo sapiens OX=9606 GN=SFRP2 PE=1 SV=2
759	618	Q9UJH8|METRN_HUMAN	132.68	85.14	0	5052	8670.4	5689.2	9	9	2	4	2	9	12	10	Carbamidomethylation	31207	Meteorin OS=Homo sapiens OX=9606 GN=METRN PE=2 SV=2
928	901	Q8NFT8|DNER_HUMAN	3146.6	3497.2	2725				6	6	8	6	9	0	0	0	Carbamidomethylation	78475	Delta and Notch-like epidermal growth factor-related receptor OS=Homo sapiens OX=9606 GN=DNER PE=1 SV=1
784	1636	A0A075B6H9|LV469_HUMAN			261.31	16097	24395	14104	5	4	0	0	1	12	13	10	Carbamidomethylation	12773	Immunoglobulin lambda variable 4-69 OS=Homo sapiens OX=9606 GN=IGLV4-69 PE=1 SV=1
632	477	Q09666|AHNK_HUMAN	868.54	1617.6	1393.3	1647	2505.5	3604.5	12	12	7	17	13	6	5	8		629114	Neuroblast differentiation-associated protein AHNAK OS=Homo sapiens OX=9606 GN=AHNAK PE=1 SV=2
873	678	Q96AQ6|PBIP1_HUMAN	547.63	491.78	645.67	1718	3134.5	1555.4	10	10	3	7	3	4	8	2	Carbamidomethylation	80643	Pre-B-cell leukemia transcription factor-interacting protein 1 OS=Homo sapiens OX=9606 GN=PBXIP1 PE=1 SV=1
731	513	Q9H7Y0|DIK2B_HUMAN			493.69	9151.1	7357.3	7354.6	10	10	0	0	1	13	12	16	Carbamidomethylation	48555	Divergent protein kinase domain 2B OS=Homo sapiens OX=9606 GN=DIPK2B PE=2 SV=3
637	504	P29120|NEC1_HUMAN	9086.9	3507.6	8309	4173.9	5521.3	1118.9	9	9	9	12	10	10	9	5	Carbamidomethylation	84152	Neuroendocrine convertase 1 OS=Homo sapiens OX=9606 GN=PCSK1 PE=1 SV=2
700	579	Q9H173|SIL1_HUMAN	469.26	901.07	254.61	7862	8292.8	4856.3	11	11	4	6	1	12	11	13		52085	Nucleotide exchange factor SIL1 OS=Homo sapiens OX=9606 GN=SIL1 PE=1 SV=1
794	471	Q93063|EXT2_HUMAN				6475.3	8824.1	4913.2	11	11	0	0	0	11	10	14	Carbamidomethylation	82255	Exostosin-2 OS=Homo sapiens OX=9606 GN=EXT2 PE=1 SV=1
819	511	P19367|HXK1_HUMAN				2646.1	2066.7	1943.9	10	10	0	0	0	8	15	9	Carbamidomethylation	102486	Hexokinase-1 OS=Homo sapiens OX=9606 GN=HK1 PE=1 SV=3
741	1025	A0A0B4J1V2|HV226_HUMAN				6992.4	5752.4	6966.7	6	3	0	1	0	14	10	16	Carbamidomethylation	13182	Immunoglobulin heavy variable 2-26 OS=Homo sapiens OX=9606 GN=IGHV2-26 PE=3 SV=1
680	611	P00338|LDHA_HUMAN	320.9	229.91	0	3498.9	3580.5	1894.6	9	8	2	7	4	15	12	10	Carbamidomethylation	36689	L-lactate dehydrogenase A chain OS=Homo sapiens OX=9606 GN=LDHA PE=1 SV=2
802	682	P55283|CADH4_HUMAN	4216.4	5507.7	4065.4	1549.6	2516	1819.8	7	7	7	7	7	4	4	5	Carbamidomethylation	100280	Cadherin-4 OS=Homo sapiens OX=9606 GN=CDH4 PE=2 SV=2
657	788	P15328|FOLR1_HUMAN	1126.4	2491.9	958.34	4748.9	5596.1	2002.7	8	8	8	8	4	13	15	5	Carbamidomethylation	29819	Folate receptor alpha OS=Homo sapiens OX=9606 GN=FOLR1 PE=1 SV=3
748	822	P47929|LEG7_HUMAN	947.63	932.91	414.2	5627.4	7806.1	4737.8	6	6	7	6	6	6	8	7	Carbamidomethylation	15075	Galectin-7 OS=Homo sapiens OX=9606 GN=LGALS7 PE=1 SV=2
1111	707	P52209|6PGD_HUMAN				2771.9	2277.9	836.46	6	6	0	0	0	6	5	2	Carbamidomethylation; Acetylation (Protein N-term)	53140	6-phosphogluconate dehydrogenase decarboxylating OS=Homo sapiens OX=9606 GN=PGD PE=1 SV=3
783	913	P52799|EFNB2_HUMAN	2147.9	2431.8	989.66	1285.7	1895.5	923.32	6	6	9	9	5	4	5	4	Carbamidomethylation	36923	Ephrin-B2 OS=Homo sapiens OX=9606 GN=EFNB2 PE=1 SV=1
965	1274	Q9H741|CL049_HUMAN	3769.7	4300.6	4318.5				5	5	9	6	6	0	0	0	Carbamidomethylation	23594	UPF0454 protein C12orf49 OS=Homo sapiens OX=9606 GN=C12orf49 PE=1 SV=1
843	680	P23470|PTPRG_HUMAN	2093.9	2348.7	1845.3				7	7	12	8	10	0	0	0	Carbamidomethylation	162003	Receptor-type tyrosine-protein phosphatase gamma OS=Homo sapiens OX=9606 GN=PTPRG PE=1 SV=4
573	1189	P48061|SDF1_HUMAN	29235	38263	25133	62977	41716	47892	7	7	13	12	8	12	9	18	Carbamidomethylation	10666	Stromal cell-derived factor 1 OS=Homo sapiens OX=9606 GN=CXCL12 PE=1 SV=1
733	613	Q6UXB8|PI16_HUMAN	5191.1	4145.5	4384.8				8	8	13	17	12	0	0	0	Carbamidomethylation	49471	Peptidase inhibitor 16 OS=Homo sapiens OX=9606 GN=PI16 PE=1 SV=1
670	882	A0A0J9YVY3|HV741_HUMAN				5189.1	6068.8	4734.5	9	6	2	1	2	14	16	16	Carbamidomethylation	12849	Immunoglobulin heavy variable 7-4-1 OS=Homo sapiens OX=9606 GN=IGHV7-4-1 PE=3 SV=1
690	461	Q6ZVL6|K154L_HUMAN	3526.5	1821.3	623.63	11416	12529	11619	12	12	4	4	3	12	14	11	Carbamidomethylation; Oxidation (M)	198997	UPF0606 protein KIAA1549L OS=Homo sapiens OX=9606 GN=KIAA1549L PE=2 SV=2
827	733	P00568|KAD1_HUMAN	0	0	0	2128.9	2467.1	2386.2	8	8	1	1	1	10	10	9	Carbamidomethylation	21635	Adenylate kinase isoenzyme 1 OS=Homo sapiens OX=9606 GN=AK1 PE=1 SV=3
959	1079	O75071|EFC14_HUMAN	7003.4	1307.3	1338.6				6	6	7	6	8	0	0	0		55032	EF-hand calcium-binding domain-containing protein 14 OS=Homo sapiens OX=9606 GN=EFCAB14 PE=1 SV=1
854	939	Q13519|PNOC_HUMAN	12877	9353.5	9416.3				9	9	9	12	9	0	0	0	Carbamidomethylation	20295	Prepronociceptin OS=Homo sapiens OX=9606 GN=PNOC PE=1 SV=1
547	1024	P0DP58|LYNX1_HUMAN	40184	49555	35079	29653	30402	26497	5	5	13	12	15	12	12	12	Carbamidomethylation; Oxidation (M)	12641	Ly-6/neurotoxin-like protein 1 OS=Homo sapiens OX=9606 GN=LYNX1 PE=1 SV=1
923	996	P00441|SODC_HUMAN	10612	9650	3851.6	22997	77101	0	7	7	8	6	4	2	3	1	Carbamidomethylation	15936	Superoxide dismutase [Cu-Zn] OS=Homo sapiens OX=9606 GN=SOD1 PE=1 SV=2
1004	918	Q12794|HYAL1_HUMAN	2326.6	2435.6	1221.9				5	5	7	8	4	0	0	0		48368	Hyaluronidase-1 OS=Homo sapiens OX=9606 GN=HYAL1 PE=1 SV=2
508	986	Q86SG5|S1A7A_HUMAN						0	7	1	10	9	6	21	23	16	Carbamidomethylation; Oxidation (M)	11305	Protein S100-A7A OS=Homo sapiens OX=9606 GN=S100A7A PE=1 SV=3
683	746	Q9Y281|COF2_HUMAN				836.46	1203.1	289.11	8	4	5	1	1	15	15	13		18737	Cofilin-2 OS=Homo sapiens OX=9606 GN=CFL2 PE=1 SV=1
791	620	Q9ULI3|HEG1_HUMAN	1367.6	1610	1223.9	316.02	889.77	387.32	8	8	11	8	10	2	3	1		147460	Protein HEG homolog 1 OS=Homo sapiens OX=9606 GN=HEG1 PE=1 SV=3
989	655	P08185|CBG_HUMAN	1376	2050.7	1142.2				8	7	4	12	4	0	0	0		45141	Corticosteroid-binding globulin OS=Homo sapiens OX=9606 GN=SERPINA6 PE=1 SV=1
621	903	P0DP01|HV108_HUMAN				132.58	249.92		9	1	1	1	1	25	19	12	Carbamidomethylation	12992	Immunoglobulin heavy variable 1-8 OS=Homo sapiens OX=9606 GN=IGHV1-8 PE=3 SV=1
558	1317	P01593|KVD33_HUMAN	584.38	1150	651.14	14089	13285	7697.1	5	2	4	3	5	15	19	28	Oxidation (M)	12848	Immunoglobulin kappa variable 1D-33 OS=Homo sapiens OX=9606 GN=IGKV1D-33 PE=1 SV=2
558	1318	P01594|KV133_HUMAN	584.38	1150	651.14	14089	13285	7697.1	5	2	4	3	5	15	19	28	Oxidation (M)	12848	Immunoglobulin kappa variable 1-33 OS=Homo sapiens OX=9606 GN=IGKV1-33 PE=1 SV=2
818	605	P48740|MASP1_HUMAN	488.54	2393.4	384.39				8	7	7	10	9	2	2	2	Carbamidomethylation	79247	Mannan-binding lectin serine protease 1 OS=Homo sapiens OX=9606 GN=MASP1 PE=1 SV=3
1005	796	P13284|GILT_HUMAN	2283.5	1800.8	1916.7				6	6	6	7	6	0	0	0	Carbamidomethylation	27964	Gamma-interferon-inducible lysosomal thiol reductase OS=Homo sapiens OX=9606 GN=IFI30 PE=1 SV=3
673	954	P01040|CYTA_HUMAN	3393.9	3717.9	2486.5	21781	20999	17869	6	6	9	6	7	11	7	11		11006	Cystatin-A OS=Homo sapiens OX=9606 GN=CSTA PE=1 SV=1
976	624	P58215|LOXL3_HUMAN				922.36	1341.4	870.91	8	8	0	0	0	7	5	8	Carbamidomethylation; Acetylation (Protein N-term)	83166	Lysyl oxidase homolog 3 OS=Homo sapiens OX=9606 GN=LOXL3 PE=1 SV=1
774	735	O60241|AGRB2_HUMAN	4482.5	6148.6	3463.2				6	5	14	12	10	0	0	0	Carbamidomethylation	172655	Adhesion G protein-coupled receptor B2 OS=Homo sapiens OX=9606 GN=ADGRB2 PE=1 SV=2
857	1039	Q9UKB5|AJAP1_HUMAN				13612	14928	8712.8	5	5	0	0	0	11	11	7		44536	Adherens junction-associated protein 1 OS=Homo sapiens OX=9606 GN=AJAP1 PE=1 SV=1
622	938	A0A075B6K5|LV39_HUMAN				13919	15092	6219.2	7	2	7	5	3	15	16	13	Carbamidomethylation; Acetylation (Protein N-term)	12332	Immunoglobulin lambda variable 3-9 OS=Homo sapiens OX=9606 GN=IGLV3-9 PE=3 SV=1
1129	752	Q9BYC5|FUT8_HUMAN				2094.8	1107.1	241.79	6	6	0	0	0	5	5	2		66516	Alpha-(1 6)-fucosyltransferase OS=Homo sapiens OX=9606 GN=FUT8 PE=1 SV=2
712	716	P52943|CRIP2_HUMAN	421.73	896.38	0	8794.5	9821.1	8438.5	7	7	3	7	4	10	10	12	Carbamidomethylation	22493	Cysteine-rich protein 2 OS=Homo sapiens OX=9606 GN=CRIP2 PE=1 SV=1
551	753	Q9NRR1|CYTL1_HUMAN	3196.5	4624.2	4203.2	14771	13647	11743	9	9	8	17	14	12	12	12	Carbamidomethylation	15577	Cytokine-like protein 1 OS=Homo sapiens OX=9606 GN=CYTL1 PE=1 SV=1
865	803	O00300|TR11B_HUMAN	0	185.16	0	2643.3	3231.3	2507	5	5	1	1	1	9	10	6	Carbamidomethylation	46026	Tumor necrosis factor receptor superfamily member 11B OS=Homo sapiens OX=9606 GN=TNFRSF11B PE=1 SV=3
665	755	Q9BZC7|ABCA2_HUMAN	10869	10919	5873.1				13	13	17	19	16	0	0	0	Carbamidomethylation	269830	ATP-binding cassette sub-family A member 2 OS=Homo sapiens OX=9606 GN=ABCA2 PE=1 SV=4
444	1158	P06312|KV401_HUMAN	13780	16484	10983	287080	251230	255500	5	5	9	14	10	23	20	27	Carbamidomethylation; Oxidation (M)	13380	Immunoglobulin kappa variable 4-1 OS=Homo sapiens OX=9606 GN=IGKV4-1 PE=1 SV=1
930	775	Q01518|CAP1_HUMAN	83.009			1893.5	2897.4	1707	6	6	1	0	0	7	6	9	Carbamidomethylation	51902	Adenylyl cyclase-associated protein 1 OS=Homo sapiens OX=9606 GN=CAP1 PE=1 SV=5
850	872	Q8TCZ2|C99L2_HUMAN	6240.1	5366.2	4346	4077.2	5799.6	1798.6	7	7	7	10	4	5	3	1	Carbamidomethylation	27986	CD99 antigen-like protein 2 OS=Homo sapiens OX=9606 GN=CD99L2 PE=1 SV=1
785	700	O43556|SGCE_HUMAN	3077.1	61273	2211.8				7	7	16	9	11	0	0	0	Carbamidomethylation	49851	Epsilon-sarcoglycan OS=Homo sapiens OX=9606 GN=SGCE PE=1 SV=6
89	1133	P07477|TRY1_HUMAN	833110	962730	819130	699390	720650	744710	10	3	129	124	113	120	108	92	Carbamidomethylation; Oxidation (M)	26558	Trypsin-1 OS=Homo sapiens OX=9606 GN=PRSS1 PE=1 SV=1
710	437	P10253|LYAG_HUMAN	4754.4	5872.4	2976.1	114.74	532.98		12	12	18	14	12	1	1	0	Carbamidomethylation	105324	Lysosomal alpha-glucosidase OS=Homo sapiens OX=9606 GN=GAA PE=1 SV=4
749	878	P23435|CBLN1_HUMAN	1205.8	1669.4	787.73	4540.2	5541.4	2311.3	7	7	5	10	6	5	7	7	Carbamidomethylation	21097	Cerebellin-1 OS=Homo sapiens OX=9606 GN=CBLN1 PE=1 SV=1
867	710	Q2TAL6|VWC2_HUMAN	0	0	0	9876.7	7269.7	7732.6	7	7	1	1	1	8	8	9	Carbamidomethylation	35282	Brorin OS=Homo sapiens OX=9606 GN=VWC2 PE=1 SV=1
717	935	Q96FE7|P3IP1_HUMAN	5234.4	10688	6362.8	752.35	2574.2	1156.4	7	7	14	13	13	2	2	1	Carbamidomethylation	28248	Phosphoinositide-3-kinase-interacting protein 1 OS=Homo sapiens OX=9606 GN=PIK3IP1 PE=1 SV=2
979	675	Q4ZHG4|FNDC1_HUMAN	460.65	518.64	301.36	1468.5	1646.4	1628.5	6	6	3	1	3	5	5	3	Carbamidomethylation	205557	Fibronectin type III domain-containing protein 1 OS=Homo sapiens OX=9606 GN=FNDC1 PE=2 SV=4
951	928	P31949|S10AB_HUMAN	1345.6	1116.4	715.62	5162.9	5847.2	4593.5	5	5	4	3	1	3	5	6	Carbamidomethylation	11740	Protein S100-A11 OS=Homo sapiens OX=9606 GN=S100A11 PE=1 SV=2
1012	1132	P52823|STC1_HUMAN		0		2254.9	1582.9	1173.1	5	5	0	1	0	6	9	3	Carbamidomethylation	27621	Stanniocalcin-1 OS=Homo sapiens OX=9606 GN=STC1 PE=1 SV=1
747	702	Q9NPC4|A4GAT_HUMAN	735.77	1225.2	750.35	7817.8	9943.4	5132.3	8	8	6	6	4	7	11	6	Carbamidomethylation	40499	Lactosylceramide 4-alpha-galactosyltransferase OS=Homo sapiens OX=9606 GN=A4GALT PE=1 SV=1
1019	784	P49767|VEGFC_HUMAN		379.58		987.69	2073.8	952.8	6	6	0	2	0	4	10	2	Carbamidomethylation	46883	Vascular endothelial growth factor C OS=Homo sapiens OX=9606 GN=VEGFC PE=1 SV=1
998	556	O60462|NRP2_HUMAN	71.508	268.8	0	259.8		195.22	9	7	3	8	2	3	2	1	Carbamidomethylation	104831	Neuropilin-2 OS=Homo sapiens OX=9606 GN=NRP2 PE=1 SV=3
1055	816	P40926|MDHM_HUMAN				1745.4	2677.7	236.24	6	6	0	0	0	7	8	1	Carbamidomethylation	35503	Malate dehydrogenase mitochondrial OS=Homo sapiens OX=9606 GN=MDH2 PE=1 SV=3
896	656	Q06033|ITIH3_HUMAN	1581.3	2709.3	1077.5	1837.8	2569.9	933.91	7	7	5	2	3	3	8	4		99849	Inter-alpha-trypsin inhibitor heavy chain H3 OS=Homo sapiens OX=9606 GN=ITIH3 PE=1 SV=2
358	726	P19013|K2C4_HUMAN				820.47	1304.4		11	1	23	21	22	28	31	24		57285	Keratin type II cytoskeletal 4 OS=Homo sapiens OX=9606 GN=KRT4 PE=1 SV=4
821	699	Q15223|NECT1_HUMAN	3552.6	5910.2	2647.3		590.3		8	8	8	13	10	0	1	0	Carbamidomethylation	57158	Nectin-1 OS=Homo sapiens OX=9606 GN=NECTIN1 PE=1 SV=3
460	1072	P15814|IGLL1_HUMAN	5728.9	6771.7	3656	105720	88103	116850	9	4	2	3	4	29	30	31	Carbamidomethylation; Oxidation (M); Acetylation (Protein N-term)	22963	Immunoglobulin lambda-like polypeptide 1 OS=Homo sapiens OX=9606 GN=IGLL1 PE=1 SV=1
856	549	P04062|GLCM_HUMAN		0		3648.1	9857.2	5817.8	11	11	0	2	0	7	11	9	Carbamidomethylation	59716	Lysosomal acid glucosylceramidase OS=Homo sapiens OX=9606 GN=GBA PE=1 SV=3
275	1245	P07478|TRY2_HUMAN	353140	438050	334050	234450	281140	212500	10	7	31	40	39	32	36	24	Carbamidomethylation	26488	Trypsin-2 OS=Homo sapiens OX=9606 GN=PRSS2 PE=1 SV=1
897	703	Q96HD1|CREL1_HUMAN	401.82	391.12		4438.8	4964.8	3064.9	7	7	1	1	0	8	8	7	Carbamidomethylation	45440	Cysteine-rich with EGF-like domain protein 1 OS=Homo sapiens OX=9606 GN=CRELD1 PE=1 SV=3
862	801	Q53H76|PLA1A_HUMAN	1098.8	3405.4	1861.5	549.81	1771.8	431.31	6	6	8	7	5	3	3	3	Carbamidomethylation	49716	Phospholipase A1 member A OS=Homo sapiens OX=9606 GN=PLA1A PE=2 SV=2
758	860	Q93079|H2B1H_HUMAN	3973.5	4365.3	3817.4	14694	11659	11050	7	7	5	7	4	8	8	7		13892	Histone H2B type 1-H OS=Homo sapiens OX=9606 GN=HIST1H2BH PE=1 SV=3
758	861	Q5QNW6|H2B2F_HUMAN	3973.5	4365.3	3817.4	14694	11659	11050	7	7	5	7	4	8	8	7		13920	Histone H2B type 2-F OS=Homo sapiens OX=9606 GN=HIST2H2BF PE=1 SV=3
758	864	P62807|H2B1C_HUMAN	3973.5	4365.3	3817.4	14694	11659	11050	7	7	5	7	4	8	8	7		13906	Histone H2B type 1-C/E/F/G/I OS=Homo sapiens OX=9606 GN=HIST1H2BC PE=1 SV=4
758	865	P58876|H2B1D_HUMAN	3973.5	4365.3	3817.4	14694	11659	11050	7	7	5	7	4	8	8	7		13936	Histone H2B type 1-D OS=Homo sapiens OX=9606 GN=HIST1H2BD PE=1 SV=2
758	866	Q99877|H2B1N_HUMAN	3973.5	4365.3	3817.4	14694	11659	11050	7	7	5	7	4	8	8	7		13922	Histone H2B type 1-N OS=Homo sapiens OX=9606 GN=HIST1H2BN PE=1 SV=3
758	867	O60814|H2B1K_HUMAN	3973.5	4365.3	3817.4	14694	11659	11050	7	7	5	7	4	8	8	7		13890	Histone H2B type 1-K OS=Homo sapiens OX=9606 GN=HIST1H2BK PE=1 SV=3
758	868	Q99879|H2B1M_HUMAN	3973.5	4365.3	3817.4	14694	11659	11050	7	7	5	7	4	8	8	7		13989	Histone H2B type 1-M OS=Homo sapiens OX=9606 GN=HIST1H2BM PE=1 SV=3
758	869	P57053|H2BFS_HUMAN	3973.5	4365.3	3817.4	14694	11659	11050	7	7	5	7	4	8	8	7		13944	Histone H2B type F-S OS=Homo sapiens OX=9606 GN=H2BFS PE=1 SV=2
454	1066	P62979|RS27A_HUMAN	21209	25640	22578	52867	46106	36034	6	6	16	18	13	18	18	18		17965	Ubiquitin-40S ribosomal protein S27a OS=Homo sapiens OX=9606 GN=RPS27A PE=1 SV=2
454	1128	P0CG47|UBB_HUMAN	21209	25640	22578	52867	46106	36034	6	6	16	18	13	18	18	18		25762	Polyubiquitin-B OS=Homo sapiens OX=9606 GN=UBB PE=1 SV=1
454	1130	P0CG48|UBC_HUMAN	21209	25640	22578	52867	46106	36034	6	6	16	18	13	18	18	18		77039	Polyubiquitin-C OS=Homo sapiens OX=9606 GN=UBC PE=1 SV=3
454	1148	P62987|RL40_HUMAN	21209	25640	22578	52867	46106	36034	6	6	16	18	13	18	18	18		14728	Ubiquitin-60S ribosomal protein L40 OS=Homo sapiens OX=9606 GN=UBA52 PE=1 SV=2
666	858	Q9Y287|ITM2B_HUMAN	67118	78711	38661	485.92		1471.8	9	9	15	20	13	2	0	2	Carbamidomethylation	30338	Integral membrane protein 2B OS=Homo sapiens OX=9606 GN=ITM2B PE=1 SV=1
825	857	P28300|LYOX_HUMAN	3083	4551.9	2036.5	2632.9	2974	2576.5	6	6	5	10	5	2	5	5		46944	Protein-lysine 6-oxidase OS=Homo sapiens OX=9606 GN=LOX PE=1 SV=2
836	845	Q9P0L0|VAPA_HUMAN			4261.2	10891	11137	10295	6	5	0	0	2	9	8	12		27893	Vesicle-associated membrane protein-associated protein A OS=Homo sapiens OX=9606 GN=VAPA PE=1 SV=3
1065	744	Q9Y5I4|PCDC2_HUMAN	298.91	645.25	273.54				6	6	3	6	6	0	0	0	Carbamidomethylation	109450	Protocadherin alpha-C2 OS=Homo sapiens OX=9606 GN=PCDHAC2 PE=2 SV=1
832	691	P62258|1433E_HUMAN	1776.8	2222.1	1496.9				7	5	10	10	9	1	1	0	Acetylation (Protein N-term)	29174	14-3-3 protein epsilon OS=Homo sapiens OX=9606 GN=YWHAE PE=1 SV=1
848	1064	Q13433|S39A6_HUMAN	0	245.1	220.85	6499.6	6801.3	4981.9	5	5	2	1	1	10	9	7	Carbamidomethylation	85047	Zinc transporter ZIP6 OS=Homo sapiens OX=9606 GN=SLC39A6 PE=1 SV=3
837	539	P80108|PHLD_HUMAN	1607.7	716.85	820.17				9	9	13	10	8	0	0	0	Carbamidomethylation	92336	Phosphatidylinositol-glycan-specific phospholipase D OS=Homo sapiens OX=9606 GN=GPLD1 PE=1 SV=3
895	635	Q9UPZ6|THS7A_HUMAN				1321.1	1079.7	710.51	7	7	0	0	0	8	9	8	Carbamidomethylation	185363	Thrombospondin type-1 domain-containing protein 7A OS=Homo sapiens OX=9606 GN=THSD7A PE=1 SV=4
798	835	P18669|PGAM1_HUMAN	815.37	793.36	735.04	273	1075.2	0	6	6	9	11	4	6	3	2	Carbamidomethylation	28804	Phosphoglycerate mutase 1 OS=Homo sapiens OX=9606 GN=PGAM1 PE=1 SV=2
913	693	P52848|NDST1_HUMAN				1804.4	1578.4	1235.3	7	7	0	0	0	10	8	6		100868	Bifunctional heparan sulfate N-deacetylase/N-sulfotransferase 1 OS=Homo sapiens OX=9606 GN=NDST1 PE=1 SV=1
772	674	P58417|NXPH1_HUMAN	7962.1	7967.4	5339.1	1346.7	1744.9	1345.1	8	5	5	4	4	9	6	9	Carbamidomethylation	31082	Neurexophilin-1 OS=Homo sapiens OX=9606 GN=NXPH1 PE=2 SV=1
903	600	Q8WX77|IBPL1_HUMAN				6728.3	7091.6	4857.7	10	10	0	0	0	9	9	7	Carbamidomethylation	29005	Insulin-like growth factor-binding protein-like 1 OS=Homo sapiens OX=9606 GN=IGFBPL1 PE=2 SV=1
658	1289	A0A075B6J9|LV218_HUMAN				1096.9	1436.5	1560.5	6	1	2	2	2	15	17	15		12412	Immunoglobulin lambda variable 2-18 OS=Homo sapiens OX=9606 GN=IGLV2-18 PE=3 SV=2
889	798	Q969T9|WBP2_HUMAN	7435.6	6597.2	5268.9				8	8	13	8	5	0	0	0		28087	WW domain-binding protein 2 OS=Homo sapiens OX=9606 GN=WBP2 PE=1 SV=1
888	885	P50502|F10A1_HUMAN	132.81		0	3764.1	3181.4	2062.5	5	5	3	0	1	7	9	6	Carbamidomethylation	41332	Hsc70-interacting protein OS=Homo sapiens OX=9606 GN=ST13 PE=1 SV=2
985	815	O94919|ENDD1_HUMAN	1129.2	1616.5	932.77				6	6	9	5	6	0	0	0	Carbamidomethylation	55017	Endonuclease domain-containing 1 protein OS=Homo sapiens OX=9606 GN=ENDOD1 PE=1 SV=2
1064	1018	P68036|UB2L3_HUMAN				6383.8	7839	4225.5	5	5	0	0	0	4	8	4		17862	Ubiquitin-conjugating enzyme E2 L3 OS=Homo sapiens OX=9606 GN=UBE2L3 PE=1 SV=1
1094	1052	P52565|GDIR1_HUMAN	263.13	185.2	0	944.05	1081.1	1596.2	4	4	2	2	1	5	2	2	Carbamidomethylation; Acetylation (Protein N-term)	23207	Rho GDP-dissociation inhibitor 1 OS=Homo sapiens OX=9606 GN=ARHGDIA PE=1 SV=3
881	1303	Q9NZC2|TREM2_HUMAN	16425	25288	11082				4	4	9	11	7	0	0	0	Carbamidomethylation	25447	Triggering receptor expressed on myeloid cells 2 OS=Homo sapiens OX=9606 GN=TREM2 PE=1 SV=1
982	721	P56159|GFRA1_HUMAN				3581.8	3506.3	3056	7	7	0	0	0	7	8	5	Carbamidomethylation	51456	GDNF family receptor alpha-1 OS=Homo sapiens OX=9606 GN=GFRA1 PE=1 SV=2
939	1048	P62937|PPIA_HUMAN	2804.7	1874.5	2244.7	563.52	464.91		5	5	5	7	5	4	2	0	Carbamidomethylation; Acetylation (Protein N-term)	18012	Peptidyl-prolyl cis-trans isomerase A OS=Homo sapiens OX=9606 GN=PPIA PE=1 SV=2
1003	909	Q6E0U4|DMKN_HUMAN	2361.9	3687	1455.3	172.48		0	6	6	10	4	3	1	0	1		47082	Dermokine OS=Homo sapiens OX=9606 GN=DMKN PE=1 SV=3
956	652	P39059|COFA1_HUMAN	1622.1	1557	348.23	997.86	2482.7	1273.5	7	7	4	3	1	5	5	3	Carbamidomethylation	141720	Collagen alpha-1(XV) chain OS=Homo sapiens OX=9606 GN=COL15A1 PE=1 SV=2
788	1371	P60022|DEFB1_HUMAN	0	294.68	43.286	12141	19043	16033	6	6	3	2	2	9	12	8	Carbamidomethylation	7420	Beta-defensin 1 OS=Homo sapiens OX=9606 GN=DEFB1 PE=1 SV=1
643	1319	P60033|CD81_HUMAN	2687.9	2672.5	2503	8561.6	5613	5444.8	3	3	10	9	10	8	8	10	Carbamidomethylation	25809	CD81 antigen OS=Homo sapiens OX=9606 GN=CD81 PE=1 SV=1
840	1034	P12273|PIP_HUMAN	725.08	1834	1216.3	9895.7	9967.3	7644.7	5	5	2	5	3	5	7	9	Carbamidomethylation	16572	Prolactin-inducible protein OS=Homo sapiens OX=9606 GN=PIP PE=1 SV=1
1086	897	Q14114|LRP8_HUMAN				1843	1830	1360.5	5	5	0	0	0	5	3	6	Carbamidomethylation	105634	Low-density lipoprotein receptor-related protein 8 OS=Homo sapiens OX=9606 GN=LRP8 PE=1 SV=4
946	473	Q14517|FAT1_HUMAN			0	763.29	1198.7	171.4	11	11	0	0	1	12	7	2	Carbamidomethylation; Oxidation (M); Acetylation (Protein N-term)	506278	Protocadherin Fat 1 OS=Homo sapiens OX=9606 GN=FAT1 PE=1 SV=2
649	1653	P01704|LV214_HUMAN	0	0		3683	11342		8	2	3	3	1	15	17	15		12597	Immunoglobulin lambda variable 2-14 OS=Homo sapiens OX=9606 GN=IGLV2-14 PE=1 SV=2
933	705	Q6EMK4|VASN_HUMAN	3525.5	3676.4	2766.5				7	7	7	8	8	0	0	0		71713	Vasorin OS=Homo sapiens OX=9606 GN=VASN PE=1 SV=1
746	813	Q8N3J6|CADM2_HUMAN	4453	2816.1	2891	3107.5	3901.6	4062.9	8	8	12	6	5	3	8	6	Carbamidomethylation	47554	Cell adhesion molecule 2 OS=Homo sapiens OX=9606 GN=CADM2 PE=2 SV=1
1020	915	Q9HC56|PCDH9_HUMAN	490.47	901.18	687.07				5	5	6	5	7	0	0	0		136064	Protocadherin-9 OS=Homo sapiens OX=9606 GN=PCDH9 PE=1 SV=2
1031	828	P20851|C4BPB_HUMAN				6777.6	3309	1745.5	6	6	0	0	0	7	7	4	Carbamidomethylation	28357	C4b-binding protein beta chain OS=Homo sapiens OX=9606 GN=C4BPB PE=1 SV=1
1087	982	O75083|WDR1_HUMAN	0	308.64		1563.8	2062.8	1911	4	4	1	1	0	3	4	5	Carbamidomethylation	66194	WD repeat-containing protein 1 OS=Homo sapiens OX=9606 GN=WDR1 PE=1 SV=4
975	591	P35579|MYH9_HUMAN				2263.6	1691.9	0	8	8	0	0	0	7	8	5	Carbamidomethylation	226530	Myosin-9 OS=Homo sapiens OX=9606 GN=MYH9 PE=1 SV=4
644	1314	P04216|THY1_HUMAN	28623	35673	27627	42258	14391	38063	4	4	13	8	9	9	8	8	Carbamidomethylation	17935	Thy-1 membrane glycoprotein OS=Homo sapiens OX=9606 GN=THY1 PE=1 SV=2
789	1152	P10092|CALCB_HUMAN	2556.1	1943	1347.3	1298.7	703.34	672.35	4	3	7	6	7	5	6	5	Carbamidomethylation	13706	Calcitonin gene-related peptide 2 OS=Homo sapiens OX=9606 GN=CALCB PE=1 SV=1
736	1121	P05019|IGF1_HUMAN	653.14	929.87	109.03	13702	13881	9547	5	5	3	4	4	11	11	9	Carbamidomethylation	21841	Insulin-like growth factor I OS=Homo sapiens OX=9606 GN=IGF1 PE=1 SV=1
868	665	Q8NBJ4|GOLM1_HUMAN	3379	4746.5	2253.1				9	9	9	13	6	0	0	0		45333	Golgi membrane protein 1 OS=Homo sapiens OX=9606 GN=GOLM1 PE=1 SV=1
977	650	Q07092|COGA1_HUMAN	0	0		4892.5	6210.5	3693.5	8	8	2	1	0	5	5	7	Carbamidomethylation	157751	Collagen alpha-1(XVI) chain OS=Homo sapiens OX=9606 GN=COL16A1 PE=1 SV=2
996	1031	Q16620|NTRK2_HUMAN	3425.6	3356.8	1880.7				4	4	6	6	7	0	0	0	Carbamidomethylation	91999	BDNF/NT-3 growth factors receptor OS=Homo sapiens OX=9606 GN=NTRK2 PE=1 SV=1
1030	1124	O95157|NXPH3_HUMAN				2201.6	11441	1700.9	5	5	0	0	0	5	7	6	Carbamidomethylation	28127	Neurexophilin-3 OS=Homo sapiens OX=9606 GN=NXPH3 PE=1 SV=3
455	1019	A0A0C4DH32|HV320_HUMAN				553.72			10	1	8	9	8	26	28	22	Carbamidomethylation	12673	Immunoglobulin heavy variable 3-20 OS=Homo sapiens OX=9606 GN=IGHV3-20 PE=3 SV=2
765	692	P63010|AP2B1_HUMAN	349.33	439.41	137.78	490.06	1135.5	1248	7	7	10	4	8	3	7	6	Carbamidomethylation	104553	AP-2 complex subunit beta OS=Homo sapiens OX=9606 GN=AP2B1 PE=1 SV=1
1119	832	Q8NBI3|DRAXI_HUMAN			219.41	3136.8	4010.3	2596.1	6	6	0	0	1	4	6	2	Carbamidomethylation	38650	Draxin OS=Homo sapiens OX=9606 GN=DRAXIN PE=1 SV=2
1040	891	P17174|AATC_HUMAN	855.31	585.38	676.08	619.77	1658.6	1333.1	5	5	4	3	1	2	4	3		46248	Aspartate aminotransferase cytoplasmic OS=Homo sapiens OX=9606 GN=GOT1 PE=1 SV=3
553	1143	P13987|CD59_HUMAN	31831	31967	24523	10067	12703	5910.9	4	4	17	15	18	10	7	8	Carbamidomethylation	14177	CD59 glycoprotein OS=Homo sapiens OX=9606 GN=CD59 PE=1 SV=1
816	837	Q9BUJ0|ABHEA_HUMAN	1756.9	2025.3	1234.6	4687.9	3471.7	2684	6	6	8	3	4	5	7	6		29765	Protein ABHD14A OS=Homo sapiens OX=9606 GN=ABHD14A PE=2 SV=2
926	991	Q15828|CYTM_HUMAN	2700.7	2629	1192.5	239.77		0	5	5	8	8	6	1	0	1	Carbamidomethylation	16511	Cystatin-M OS=Homo sapiens OX=9606 GN=CST6 PE=1 SV=1
770	1136	A0A0A0MT36|KVD21_HUMAN	0	0	0	17167	16988	14062	6	2	2	1	2	12	11	9	Acetylation (Protein N-term)	12340	Immunoglobulin kappa variable 6D-21 OS=Homo sapiens OX=9606 GN=IGKV6D-21 PE=3 SV=1
886	590	Q8NCW6|GLT11_HUMAN		0		2074.6	2573.4	1468.3	8	8	0	2	0	7	11	6	Carbamidomethylation	68919	Polypeptide N-acetylgalactosaminyltransferase 11 OS=Homo sapiens OX=9606 GN=GALNT11 PE=1 SV=2
1061	884	P08758|ANXA5_HUMAN	697.69	1686.5	713.75				6	6	3	6	7	0	0	0		35937	Annexin A5 OS=Homo sapiens OX=9606 GN=ANXA5 PE=1 SV=2
1033	833	P05089|ARGI1_HUMAN			111.79	3359.9	2562.5	591.44	6	6	0	0	2	8	6	2	Carbamidomethylation	34735	Arginase-1 OS=Homo sapiens OX=9606 GN=ARG1 PE=1 SV=2
936	763	Q9Y644|RFNG_HUMAN				3090.1	3842.7	3288.4	9	7	0	0	0	6	7	10	Carbamidomethylation	36424	Beta-1 3-N-acetylglucosaminyltransferase radical fringe OS=Homo sapiens OX=9606 GN=RFNG PE=2 SV=3
987	616	Q9NPR2|SEM4B_HUMAN	1160.5	483.66	127.58				8	8	6	8	6	0	0	0	Carbamidomethylation	92766	Semaphorin-4B OS=Homo sapiens OX=9606 GN=SEMA4B PE=1 SV=4
948	653	Q99523|SORT_HUMAN	130.52	323.45	343.5	1152	1076.7	0	9	9	2	4	2	5	8	1	Carbamidomethylation	92068	Sortilin OS=Homo sapiens OX=9606 GN=SORT1 PE=1 SV=3
961	952	Q6PCB0|VWA1_HUMAN	0	0	0	3790.2	4697.5	2353.1	6	6	1	3	1	5	6	5	Carbamidomethylation	46804	von Willebrand factor A domain-containing protein 1 OS=Homo sapiens OX=9606 GN=VWA1 PE=1 SV=1
919	914	Q9BUN1|MENT_HUMAN				4826.3	5524	3865.4	7	7	0	0	0	8	9	7	Carbamidomethylation	36769	Protein MENT OS=Homo sapiens OX=9606 GN=MENT PE=2 SV=1
937	817	Q16769|QPCT_HUMAN	3298.6	3669	2449.3				5	5	5	8	10	0	0	0	Carbamidomethylation	40877	Glutaminyl-peptide cyclotransferase OS=Homo sapiens OX=9606 GN=QPCT PE=1 SV=1
984	714	P48723|HSP13_HUMAN	0	537.72	367.7		129.5		7	7	5	7	7	0	1	0	Carbamidomethylation	51928	Heat shock 70 kDa protein 13 OS=Homo sapiens OX=9606 GN=HSPA13 PE=1 SV=1
604	871	O75493|CAH11_HUMAN	0	617.17	0	22912	24621	17932	9	9	2	8	2	16	17	18	Carbamidomethylation	36238	Carbonic anhydrase-related protein 11 OS=Homo sapiens OX=9606 GN=CA11 PE=1 SV=2
661	1392	P23582|ANFC_HUMAN	455.67	265.97	93.398	122130	141180	88810	4	4	2	2	2	15	16	16		13246	C-type natriuretic peptide OS=Homo sapiens OX=9606 GN=NPPC PE=1 SV=1
967	672	P06276|CHLE_HUMAN				4079.7	4559.6	4550.3	9	8	0	1	0	5	9	6	Carbamidomethylation	68418	Cholinesterase OS=Homo sapiens OX=9606 GN=BCHE PE=1 SV=1
300	1113	Q8NHM4|TRY6_HUMAN			0				8	1	31	32	29	38	27	27	Carbamidomethylation; Oxidation (M)	26537	Putative trypsin-6 OS=Homo sapiens OX=9606 GN=PRSS3P2 PE=5 SV=2
591	961	Q7Z5A7|TAFA5_HUMAN	3135.5	3291.9	1724.9	64901	72858	52377	6	6	7	4	5	16	19	17	Carbamidomethylation	14301	Chemokine-like protein TAFA-5 OS=Homo sapiens OX=9606 GN=TAFA5 PE=1 SV=2
986	814	O15197|EPHB6_HUMAN	1425.6	1697.6	926.66	0			6	6	4	9	6	1	0	0	Carbamidomethylation	110700	Ephrin type-B receptor 6 OS=Homo sapiens OX=9606 GN=EPHB6 PE=1 SV=4
1154	876	Q7Z304|MAMC2_HUMAN				1435.5	2615.4	845.76	5	5	0	0	0	3	4	4	Carbamidomethylation	77556	MAM domain-containing protein 2 OS=Homo sapiens OX=9606 GN=MAMDC2 PE=2 SV=3
543	983	O94772|LY6H_HUMAN	64350	61880	49590	5858.8	5451.5	4221.4	6	6	17	21	15	8	7	9	Carbamidomethylation; Oxidation (M)	14669	Lymphocyte antigen 6H OS=Homo sapiens OX=9606 GN=LY6H PE=1 SV=1
1018	738	Q96NU0|CNT3B_HUMAN				2208.8	3205.2	1624	6	6	0	0	0	5	9	4	Carbamidomethylation	140414	Contactin-associated protein-like 3B OS=Homo sapiens OX=9606 GN=CNTNAP3B PE=2 SV=3
1018	756	Q9BZ76|CNTP3_HUMAN				2208.8	3205.2	1624	6	6	0	0	0	5	9	4	Carbamidomethylation	140690	Contactin-associated protein-like 3 OS=Homo sapiens OX=9606 GN=CNTNAP3 PE=2 SV=3
829	1355	P29972|AQP1_HUMAN	2011.4	998.43	618.19	2445.8	2565	2610.1	6	6	7	3	3	7	5	7	Carbamidomethylation	28526	Aquaporin-1 OS=Homo sapiens OX=9606 GN=AQP1 PE=1 SV=3
833	1063	Q14956|GPNMB_HUMAN	990.37	1296.8	538.74	7301.9	5394.6	5455.7	4	4	3	5	3	7	7	6		63923	Transmembrane glycoprotein NMB OS=Homo sapiens OX=9606 GN=GPNMB PE=1 SV=2
597	1030	A0A0C4DH34|HV428_HUMAN	223.33	242.29	166.68	22946	30108	18683	9	4	3	3	3	21	17	17	Carbamidomethylation; Oxidation (M)	13124	Immunoglobulin heavy variable 4-28 OS=Homo sapiens OX=9606 GN=IGHV4-28 PE=3 SV=1
607	1069	Q5T848|GP158_HUMAN	538.73	523.76	386.45	43065	40578	32054	9	9	4	4	1	18	16	18		135489	Probable G-protein coupled receptor 158 OS=Homo sapiens OX=9606 GN=GPR158 PE=1 SV=1
902	1664	Q5BIV9|SPRN_HUMAN	3217.5	3076.8	2761.4	2118.8	1472.3	3277.7	3	3	8	4	7	2	1	3		14522	Shadow of prion protein OS=Homo sapiens OX=9606 GN=SPRN PE=2 SV=1
797	658	Q9BW30|TPPP3_HUMAN	429.76	915.68	302.38	9660.9	8222.5	5697.2	8	8	2	4	1	8	12	8	Carbamidomethylation; Acetylation (Protein N-term)	18985	Tubulin polymerization-promoting protein family member 3 OS=Homo sapiens OX=9606 GN=TPPP3 PE=1 SV=1
376	852	A0A075B6Q5|HV364_HUMAN	307.19	1934.6	756.21	18624	14710	19783	13	1	9	12	12	33	37	34	Carbamidomethylation	12891	Immunoglobulin heavy variable 3-64 OS=Homo sapiens OX=9606 GN=IGHV3-64 PE=3 SV=1
831	764	Q86Y82|STX12_HUMAN	553.37	1079.2	919.32	9107.8	12343	5842.9	6	6	4	2	3	5	7	10	Carbamidomethylation; Acetylation (Protein N-term)	31642	Syntaxin-12 OS=Homo sapiens OX=9606 GN=STX12 PE=1 SV=1
918	994	O15204|ADEC1_HUMAN	2223.2	2919.6	1392.1	7752.7	8425.9	6558	5	5	4	4	4	4	5	3	Carbamidomethylation	52775	ADAM DEC1 OS=Homo sapiens OX=9606 GN=ADAMDEC1 PE=1 SV=2
629	1084	P01742|HV169_HUMAN				8400.9	9346.1	7327.3	8	3	1	1	1	20	18	17	Carbamidomethylation	12659	Immunoglobulin heavy variable 1-69 OS=Homo sapiens OX=9606 GN=IGHV1-69 PE=1 SV=2
1205	892	P07333|CSF1R_HUMAN	1340	1417.2	836.76				5	5	3	4	2	0	0	0	Carbamidomethylation	107984	Macrophage colony-stimulating factor 1 receptor OS=Homo sapiens OX=9606 GN=CSF1R PE=1 SV=2
962	1135	A0A0C4DH24|KV621_HUMAN				1105.1	351.11	851.39	5	1	0	0	0	8	7	6		12430	Immunoglobulin kappa variable 6-21 OS=Homo sapiens OX=9606 GN=IGKV6-21 PE=3 SV=1
1096	978	P15531|NDKA_HUMAN				797.84	77.95	469.39	6	2	0	0	0	3	5	6	Carbamidomethylation	17149	Nucleoside diphosphate kinase A OS=Homo sapiens OX=9606 GN=NME1 PE=1 SV=1
1032	992	Q9UKJ1|PILRA_HUMAN				4044.9	3712	2394	5	5	0	0	0	5	6	7	Carbamidomethylation	34005	Paired immunoglobulin-like type 2 receptor alpha OS=Homo sapiens OX=9606 GN=PILRA PE=1 SV=3
1037	893	Q9UN70|PCDGK_HUMAN	0	233.38	0				4	2	1	1	2	4	4	5		101077	Protocadherin gamma-C3 OS=Homo sapiens OX=9606 GN=PCDHGC3 PE=1 SV=1
968	677	O95970|LGI1_HUMAN		0		6343	5423.3	3057	7	7	0	1	0	8	6	6	Carbamidomethylation	63818	Leucine-rich glioma-inactivated protein 1 OS=Homo sapiens OX=9606 GN=LGI1 PE=1 SV=1
981	762	P32754|HPPD_HUMAN				2943.9	1992.5	1291.2	6	6	0	0	0	9	7	4		44934	4-hydroxyphenylpyruvate dioxygenase OS=Homo sapiens OX=9606 GN=HPD PE=1 SV=2
1052	793	Q8IUK5|PLDX1_HUMAN	1377.7	1796.4	508.78				5	4	7	4	5	0	0	0	Carbamidomethylation	55760	Plexin domain-containing protein 1 OS=Homo sapiens OX=9606 GN=PLXDC1 PE=1 SV=2
999	676	Q9P232|CNTN3_HUMAN		0		2399.9	2877.1	2020.9	7	7	0	1	0	5	7	6	Carbamidomethylation	112883	Contactin-3 OS=Homo sapiens OX=9606 GN=CNTN3 PE=1 SV=3
1060	737	Q9NUQ9|FA49B_HUMAN				1498.4	1720.4	1800	6	6	0	0	0	5	3	8		36748	Protein FAM49B OS=Homo sapiens OX=9606 GN=FAM49B PE=1 SV=1
1011	886	Q9Y240|CLC11_HUMAN	5045.5	4435.9	3023.7				5	5	8	5	6	0	0	0		35695	C-type lectin domain family 11 member A OS=Homo sapiens OX=9606 GN=CLEC11A PE=1 SV=1
727	1320	P01705|LV223_HUMAN				9716.5	11076	7830.9	8	5	1	1	1	11	13	16		11893	Immunoglobulin lambda variable 2-23 OS=Homo sapiens OX=9606 GN=IGLV2-23 PE=1 SV=2
901	981	Q7Z5A9|TAFA1_HUMAN	0	876.3	133.46	13985	9631.3	7555.3	5	5	1	4	1	9	5	5	Carbamidomethylation	14901	Chemokine-like protein TAFA-1 OS=Homo sapiens OX=9606 GN=TAFA1 PE=1 SV=1
921	838	P05543|THBG_HUMAN	462.96	1164.7	786.71				6	5	5	5	5	4	2	3		46325	Thyroxine-binding globulin OS=Homo sapiens OX=9606 GN=SERPINA7 PE=1 SV=2
838	661	Q8NFZ8|CADM4_HUMAN	1955.8	1951.4	974.49				8	8	9	14	8	0	0	0	Carbamidomethylation	42785	Cell adhesion molecule 4 OS=Homo sapiens OX=9606 GN=CADM4 PE=1 SV=1
949	929	P60983|GMFB_HUMAN		281.92	156.04	5338.6	6027.9	3403.4	5	5	0	1	1	7	7	6	Carbamidomethylation; Acetylation (Protein N-term)	16713	Glia maturation factor beta OS=Homo sapiens OX=9606 GN=GMFB PE=1 SV=2
691	1049	P01715|LV301_HUMAN				18849	21492	22574	6	3	2	2	1	16	15	12	Carbamidomethylation	12296	Immunoglobulin lambda variable 3-1 OS=Homo sapiens OX=9606 GN=IGLV3-1 PE=1 SV=2
678	1016	A0A0B4J1U7|HV601_HUMAN	0	1490.7	0	43161	54024	94589	8	8	1	2	3	11	16	17	Carbamidomethylation	13481	Immunoglobulin heavy variable 6-1 OS=Homo sapiens OX=9606 GN=IGHV6-1 PE=3 SV=1
904	1098	Q6PUV4|CPLX2_HUMAN		0		6411.4	3967.4	3987.8	5	5	0	1	0	7	9	8	Carbamidomethylation	15394	Complexin-2 OS=Homo sapiens OX=9606 GN=CPLX2 PE=2 SV=2
804	647	P31946|1433B_HUMAN	159.89	627.27	209.76				8	3	13	9	10	1	1	0	Carbamidomethylation	28082	14-3-3 protein beta/alpha OS=Homo sapiens OX=9606 GN=YWHAB PE=1 SV=3
1010	663	Q9GZP0|PDGFD_HUMAN				1864.1	3021.3	1922.3	8	8	0	0	0	8	7	4	Carbamidomethylation	42848	Platelet-derived growth factor D OS=Homo sapiens OX=9606 GN=PDGFD PE=1 SV=1
845	681	P22607|FGFR3_HUMAN	617.62	1695.8	618.54	656.16		370.53	7	5	4	5	6	4	4	7	Carbamidomethylation	87710	Fibroblast growth factor receptor 3 OS=Homo sapiens OX=9606 GN=FGFR3 PE=1 SV=1
1050	781	P18206|VINC_HUMAN	156.3	185.26	133.04	185.19		233.93	5	5	4	8	2	1	0	1		123799	Vinculin OS=Homo sapiens OX=9606 GN=VCL PE=1 SV=4
1006	916	O60609|GFRA3_HUMAN				2259	2251.6	1673.5	5	5	0	0	0	6	6	7	Carbamidomethylation	44511	GDNF family receptor alpha-3 OS=Homo sapiens OX=9606 GN=GFRA3 PE=1 SV=2
958	776	Q96P44|COLA1_HUMAN				2186.8	3464.2	1565.4	6	6	0	0	0	8	8	5	Carbamidomethylation	99369	Collagen alpha-1(XXI) chain OS=Homo sapiens OX=9606 GN=COL21A1 PE=2 SV=1
1044	1111	Q9BVH7|SIA7E_HUMAN		0		4947.7	4413.6	3118	4	4	0	1	0	5	7	4	Carbamidomethylation	38443	Alpha-N-acetylgalactosaminide alpha-2 6-sialyltransferase 5 OS=Homo sapiens OX=9606 GN=ST6GALNAC5 PE=2 SV=1
424	1032	P02654|APOC1_HUMAN	48565	61310	43536	284360	310410	227100	7	7	13	17	17	21	19	23	Oxidation (M)	9332	Apolipoprotein C-I OS=Homo sapiens OX=9606 GN=APOC1 PE=1 SV=1
807	1120	P23560|BDNF_HUMAN	6016.9	3718.6	2373.7				5	5	13	12	9	0	0	0	Oxidation (M)	27818	Brain-derived neurotrophic factor OS=Homo sapiens OX=9606 GN=BDNF PE=1 SV=1
771	581	O60243|H6ST1_HUMAN	278.3	521.48	303.61	5260	4176.1	2728.3	10	6	3	2	1	9	10	12	Carbamidomethylation	48226	Heparan-sulfate 6-O-sulfotransferase 1 OS=Homo sapiens OX=9606 GN=HS6ST1 PE=1 SV=5
1058	757	P11597|CETP_HUMAN	701.4	589.19	478.82				6	6	6	7	3	0	0	0		54756	Cholesteryl ester transfer protein OS=Homo sapiens OX=9606 GN=CETP PE=1 SV=2
1026	917	P05121|PAI1_HUMAN				1974.3	1839.1	2893.9	5	5	0	0	0	5	4	9		45060	Plasminogen activator inhibitor 1 OS=Homo sapiens OX=9606 GN=SERPINE1 PE=1 SV=1
1115	874	Q9NS00|C1GLT_HUMAN				3533.5	2975.9	2026	5	5	0	0	0	5	4	4	Carbamidomethylation	42203	Glycoprotein-N-acetylgalactosamine 3-beta-galactosyltransferase 1 OS=Homo sapiens OX=9606 GN=C1GALT1 PE=1 SV=1
1084	698	Q14847|LASP1_HUMAN				1969.2	2316.9	1314.8	7	7	0	0	0	5	6	4	Carbamidomethylation	29717	LIM and SH3 domain protein 1 OS=Homo sapiens OX=9606 GN=LASP1 PE=1 SV=2
1148	973	O76070|SYUG_HUMAN	740.72	916.32	1096.1				5	5	4	3	5	0	0	0		13331	Gamma-synuclein OS=Homo sapiens OX=9606 GN=SNCG PE=1 SV=2
877	777	P27348|1433T_HUMAN	593.3	596.3					6	2	12	7	6	1	1	0		27764	14-3-3 protein theta OS=Homo sapiens OX=9606 GN=YWHAQ PE=1 SV=1
721	1047	O75173|ATS4_HUMAN	6302.6	6322.3	7048.3	5636.8	6272.8	260.9	5	5	9	9	10	6	8	1	Carbamidomethylation	90197	A disintegrin and metalloproteinase with thrombospondin motifs 4 OS=Homo sapiens OX=9606 GN=ADAMTS4 PE=1 SV=3
824	1107	P04085|PDGFA_HUMAN	15436	29671	14565	2601.9	1093.8	1405.5	5	5	6	15	5	2	1	3	Carbamidomethylation	24043	Platelet-derived growth factor subunit A OS=Homo sapiens OX=9606 GN=PDGFA PE=1 SV=1
1152	1106	Q15375|EPHA7_HUMAN	0		1180.3				4	2	4	2	3	0	2	0	Carbamidomethylation	112097	Ephrin type-A receptor 7 OS=Homo sapiens OX=9606 GN=EPHA7 PE=1 SV=3
692	848	P02743|SAMP_HUMAN	2099.4	1787.5	1465.7	19393	18005	16045	6	6	4	6	3	11	13	11		25387	Serum amyloid P-component OS=Homo sapiens OX=9606 GN=APCS PE=1 SV=2
871	962	P62834|RAP1A_HUMAN	1253.1	1350.4	786.29	1593	1190.7	607.89	5	5	10	5	5	3	2	3		20987	Ras-related protein Rap-1A OS=Homo sapiens OX=9606 GN=RAP1A PE=1 SV=1
871	972	P61224|RAP1B_HUMAN	1253.1	1350.4	786.29	1593	1190.7	607.89	5	5	10	5	5	3	2	3		20825	Ras-related protein Rap-1b OS=Homo sapiens OX=9606 GN=RAP1B PE=1 SV=1
952	643	Q8TB73|NDNF_HUMAN			0	3733.5	3497.5	2080.1	8	8	0	0	1	7	8	6	Carbamidomethylation	64673	Protein NDNF OS=Homo sapiens OX=9606 GN=NDNF PE=1 SV=2
942	931	Q86UN3|R4RL2_HUMAN				4953	5362.7	3364.1	5	4	0	0	0	8	5	10	Carbamidomethylation	46106	Reticulon-4 receptor-like 2 OS=Homo sapiens OX=9606 GN=RTN4RL2 PE=1 SV=1
1008	759	P02750|A2GL_HUMAN	663.72	844.75	157.44				7	7	7	11	1	0	0	0		38178	Leucine-rich alpha-2-glycoprotein OS=Homo sapiens OX=9606 GN=LRG1 PE=1 SV=2
1090	1074	Q9UEW3|MARCO_HUMAN	1140.8	1729.2	1130.1	8767.1	10053	8078.4	4	4	1	2	2	3	3	3	Carbamidomethylation	52658	Macrophage receptor MARCO OS=Homo sapiens OX=9606 GN=MARCO PE=1 SV=1
1071	765	Q6IS24|GLT17_HUMAN				411.28	768.99	840.7	6	6	0	0	0	4	4	7	Carbamidomethylation	67751	Polypeptide N-acetylgalactosaminyltransferase 17 OS=Homo sapiens OX=9606 GN=GALNT17 PE=2 SV=2
1051	797	P47756|CAPZB_HUMAN	0			2844.2	2642.8	716.43	5	5	2	0	0	5	6	3	Carbamidomethylation	31350	F-actin-capping protein subunit beta OS=Homo sapiens OX=9606 GN=CAPZB PE=1 SV=4
980	791	P13797|PLST_HUMAN				306.59	0	1157.6	5	2	2	1	1	6	6	4	Carbamidomethylation	70811	Plastin-3 OS=Homo sapiens OX=9606 GN=PLS3 PE=1 SV=4
815	761	P17931|LEG3_HUMAN	322.88	1044.5	292.6	4961	6213.5	4232.2	6	6	3	4	2	7	8	9		26152	Galectin-3 OS=Homo sapiens OX=9606 GN=LGALS3 PE=1 SV=5
993	927	O95156|NXPH2_HUMAN	1151.8	1640.5	1522.3			772.59	5	2	2	2	2	5	2	7	Carbamidomethylation	29938	Neurexophilin-2 OS=Homo sapiens OX=9606 GN=NXPH2 PE=2 SV=2
1039	717	P55286|CADH8_HUMAN	0	771.69	0	438.49			7	6	6	8	2	1	0	0		88253	Cadherin-8 OS=Homo sapiens OX=9606 GN=CDH8 PE=2 SV=2
655	880	A0A0C4DH55|KVD07_HUMAN		0		2913.1	4617.7	1617.9	9	2	3	3	1	18	14	14		13148	Immunoglobulin kappa variable 3D-7 OS=Homo sapiens OX=9606 GN=IGKV3D-7 PE=3 SV=5
1029	1043	P43234|CATO_HUMAN	749.29	1007.4	627.84	552.5	694.67		4	4	4	5	7	1	1	0	Carbamidomethylation	35958	Cathepsin O OS=Homo sapiens OX=9606 GN=CTSO PE=2 SV=1
1038	787	Q8N3T1|GLT15_HUMAN		0		2957.4	1317.3	1032.8	6	6	0	1	0	6	6	4	Carbamidomethylation	73063	Polypeptide N-acetylgalactosaminyltransferase 15 OS=Homo sapiens OX=9606 GN=GALNT15 PE=2 SV=2
1059	1149	Q9H1Z8|AUGN_HUMAN	2300.8	2189.2	1223			0	5	5	6	4	5	0	0	1		17183	Augurin OS=Homo sapiens OX=9606 GN=ECRG4 PE=1 SV=1
869	1242	Q6UW01|CBLN3_HUMAN	0	0	0	3031	3975.5	2348.9	3	3	5	3	2	4	4	10		21521	Cerebellin-3 OS=Homo sapiens OX=9606 GN=CBLN3 PE=1 SV=1
1022	930	Q5VWW1|C1QL3_HUMAN				3708.9	3474.2	2004.8	5	4	0	0	0	8	7	3	Carbamidomethylation; Oxidation (M)	26719	Complement C1q-like protein 3 OS=Homo sapiens OX=9606 GN=C1QL3 PE=2 SV=1
839	743	P21810|PGS1_HUMAN	407.72	799.49	0	2000.8	2167.3	943.99	6	5	4	4	6	7	6	4	Carbamidomethylation	41654	Biglycan OS=Homo sapiens OX=9606 GN=BGN PE=1 SV=2
932	688	P16070|CD44_HUMAN	2255.7	3006.4	2494.3	163.85	160.76	0	6	6	6	7	7	1	1	1	Carbamidomethylation	81538	CD44 antigen OS=Homo sapiens OX=9606 GN=CD44 PE=1 SV=3
880	1352	P63167|DYL1_HUMAN					449.14	206.27	4	1	5	4	4	4	5	5	Carbamidomethylation	10366	Dynein light chain 1 cytoplasmic OS=Homo sapiens OX=9606 GN=DYNLL1 PE=1 SV=1
927	1145	P04792|HSPB1_HUMAN	2822.3	3272.2	2131.1	2992.8	1691.4	1480	4	4	8	4	4	3	4	1		22783	Heat shock protein beta-1 OS=Homo sapiens OX=9606 GN=HSPB1 PE=1 SV=2
468	826	Q9HC57|WFDC1_HUMAN	6672.7	4276.6	2937.8	65330	80798	50704	8	8	12	14	13	21	19	18	Carbamidomethylation	23977	WAP four-disulfide core domain protein 1 OS=Homo sapiens OX=9606 GN=WFDC1 PE=2 SV=2
872	1188	P01303|NPY_HUMAN	8299	8621.2	6777.2				5	5	11	8	9	0	0	0	Oxidation (M)	10851	Pro-neuropeptide Y OS=Homo sapiens OX=9606 GN=NPY PE=1 SV=1
885	1222	Q9NZT1|CALL5_HUMAN	396.19	596.41	205.26	8081.6	7452	5549.9	4	4	3	5	2	7	4	5	Acetylation (Protein N-term)	15893	Calmodulin-like protein 5 OS=Homo sapiens OX=9606 GN=CALML5 PE=1 SV=2
1109	887	Q15459|SF3A1_HUMAN				13257	4522.9	2314.5	5	5	0	0	0	5	5	3		88886	Splicing factor 3A subunit 1 OS=Homo sapiens OX=9606 GN=SF3A1 PE=1 SV=1
750	834	Q9UM22|EPDR1_HUMAN	304.69	316.72	0	12879	12363	8270.3	7	7	5	4	1	10	11	9	Carbamidomethylation	25437	Mammalian ependymin-related protein 1 OS=Homo sapiens OX=9606 GN=EPDR1 PE=1 SV=2
1089	895	P23381|SYWC_HUMAN				2859.7	2216	1418.3	5	5	0	0	0	6	5	3		53165	Tryptophan--tRNA ligase cytoplasmic OS=Homo sapiens OX=9606 GN=WARS PE=1 SV=2
1024	950	O75973|C1QRF_HUMAN				4839.4	4603.8	375.04	5	4	0	0	0	7	9	2	Carbamidomethylation	26453	C1q-related factor OS=Homo sapiens OX=9606 GN=C1QL1 PE=1 SV=1
751	1172	P50238|CRIP1_HUMAN	506.39	767.76	82.132	12911	10498	8246.6	4	4	3	5	3	8	10	11	Carbamidomethylation	8533	Cysteine-rich protein 1 OS=Homo sapiens OX=9606 GN=CRIP1 PE=1 SV=3
1104	1326	Q15847|ADIRF_HUMAN	5729.5	4940.9	3345.4				3	3	4	5	5	0	0	0		7855	Adipogenesis regulatory factor OS=Homo sapiens OX=9606 GN=ADIRF PE=1 SV=1
906	888	P60520|GBRL2_HUMAN				6085.3	6487.4	5485.5	6	4	0	0	0	9	7	9		13667	Gamma-aminobutyric acid receptor-associated protein-like 2 OS=Homo sapiens OX=9606 GN=GABARAPL2 PE=1 SV=1
1054	1085	P08195|4F2_HUMAN	72.025	165.38	119.33	355.56	242.96	170.45	4	4	5	2	1	3	2	3		67994	4F2 cell-surface antigen heavy chain OS=Homo sapiens OX=9606 GN=SLC3A2 PE=1 SV=3
860	940	Q0P6D2|DIK1C_HUMAN	761.42	1738.9	559.89	661.63	1234.8	973.27	5	5	6	6	7	4	3	3	Carbamidomethylation	46420	Divergent protein kinase domain 1C OS=Homo sapiens OX=9606 GN=DIPK1C PE=2 SV=3
1103	1146	Q96RP7|G3ST4_HUMAN	0	257.72		697.5	736.15	143.29	4	4	1	4	0	2	5	2	Carbamidomethylation	54166	Galactose-3-O-sulfotransferase 4 OS=Homo sapiens OX=9606 GN=GAL3ST4 PE=1 SV=1
1171	1138	P26992|CNTFR_HUMAN	853.07	1301.7	746.08				4	4	2	5	4	0	0	0		40633	Ciliary neurotrophic factor receptor subunit alpha OS=Homo sapiens OX=9606 GN=CNTFR PE=1 SV=2
1112	773	Q6UY14|ATL4_HUMAN		132.3		243.99	518.22	287.38	6	6	0	2	0	2	7	2	Carbamidomethylation	116545	ADAMTS-like protein 4 OS=Homo sapiens OX=9606 GN=ADAMTSL4 PE=1 SV=2
909	1365	Q9NPD7|NRN1_HUMAN	6818.5	9323.1	5942.9	1990.8	2028.9	1910.3	3	3	5	4	10	2	1	3	Carbamidomethylation; Oxidation (M)	15333	Neuritin OS=Homo sapiens OX=9606 GN=NRN1 PE=2 SV=1
969	1251	P35318|ADML_HUMAN	412.49	1325.3	541.44				3	3	6	7	8	0	0	0		20420	ADM OS=Homo sapiens OX=9606 GN=ADM PE=1 SV=1
920	660	P17405|ASM_HUMAN				1613.9	1059.9	1760.1	6	6	0	0	0	10	7	7	Carbamidomethylation	69936	Sphingomyelin phosphodiesterase OS=Homo sapiens OX=9606 GN=SMPD1 PE=1 SV=5
1028	985	O43916|CHST1_HUMAN			0	2960.6	3954.9	1777.5	4	4	0	0	1	8	6	3	Carbamidomethylation	46715	Carbohydrate sulfotransferase 1 OS=Homo sapiens OX=9606 GN=CHST1 PE=1 SV=1
1000	821	Q13443|ADAM9_HUMAN	557.19	721.73	410.15		131470		5	5	9	4	5	0	1	0	Carbamidomethylation	90556	Disintegrin and metalloproteinase domain-containing protein 9 OS=Homo sapiens OX=9606 GN=ADAM9 PE=1 SV=1
925	1311	Q13361|MFAP5_HUMAN	2566.4	2558.3	2000.9				4	4	7	11	6	0	0	0	Carbamidomethylation	19612	Microfibrillar-associated protein 5 OS=Homo sapiens OX=9606 GN=MFAP5 PE=1 SV=1
719	1722	Q1XH10|SKDA1_HUMAN	602.16	405.23	321.08	706.19	598.93	440.32	6	1	8	6	10	7	4	9		98148	SKI/DACH domain-containing protein 1 OS=Homo sapiens OX=9606 GN=SKIDA1 PE=1 SV=2
719	1879	P0CG40|SP9_HUMAN	602.16	405.23	321.08	706.19	598.93	440.32	6	1	8	6	10	7	4	9		48915	Transcription factor Sp9 OS=Homo sapiens OX=9606 GN=SP9 PE=3 SV=1
1049	1114	O95450|ATS2_HUMAN	2258.6	1315.9	889.14				3	3	4	7	5	0	0	0		134755	A disintegrin and metalloproteinase with thrombospondin motifs 2 OS=Homo sapiens OX=9606 GN=ADAMTS2 PE=2 SV=2
826	772	Q14574|DSC3_HUMAN		0		19311	15880	19532	8	8	0	1	0	10	13	8	Carbamidomethylation	99969	Desmocollin-3 OS=Homo sapiens OX=9606 GN=DSC3 PE=1 SV=3
963	934	P29122|PCSK6_HUMAN				1235.6	3954	2561.5	5	5	0	0	0	4	8	9	Carbamidomethylation	106420	Proprotein convertase subtilisin/kexin type 6 OS=Homo sapiens OX=9606 GN=PCSK6 PE=1 SV=1
1156	1366	P63241|IF5A1_HUMAN			164.13	817.03	1148.7	566.68	3	3	0	0	1	3	4	3	Carbamidomethylation; Acetylation (Protein N-term)	16832	Eukaryotic translation initiation factor 5A-1 OS=Homo sapiens OX=9606 GN=EIF5A PE=1 SV=2
1156	1368	Q6IS14|IF5AL_HUMAN			164.13	817.03	1148.7	566.68	3	3	0	0	1	3	4	3	Carbamidomethylation; Acetylation (Protein N-term)	16773	Eukaryotic translation initiation factor 5A-1-like OS=Homo sapiens OX=9606 GN=EIF5AL1 PE=2 SV=2
1034	1190	P02775|CXCL7_HUMAN				6594.4	4484.6	4245.9	4	4	0	0	0	6	5	7	Carbamidomethylation	13894	Platelet basic protein OS=Homo sapiens OX=9606 GN=PPBP PE=1 SV=3
806	941	P10412|H14_HUMAN	180.76	0	0	592.13	317.48		5	1	6	7	6	5	5	5	Acetylation (Protein N-term)	21865	Histone H1.4 OS=Homo sapiens OX=9606 GN=HIST1H1E PE=1 SV=2
1210	1095	Q6UVY6|MOXD1_HUMAN				1729.3	5733.4	919.66	4	4	0	0	0	2	4	3	Carbamidomethylation	69653	DBH-like monooxygenase protein 1 OS=Homo sapiens OX=9606 GN=MOXD1 PE=1 SV=1
879	768	P61586|RHOA_HUMAN	469.96	1255.5	431.25	1232.4	1582.6	918.23	6	6	3	5	4	8	4	3	Carbamidomethylation	21768	Transforming protein RhoA OS=Homo sapiens OX=9606 GN=RHOA PE=1 SV=1
737	1038	P14174|MIF_HUMAN	1453	1846.6	2397.3	32092	24583	24808	5	5	5	8	6	8	6	9	Carbamidomethylation	12476	Macrophage migration inhibitory factor OS=Homo sapiens OX=9606 GN=MIF PE=1 SV=4
1297	1022	P52907|CAZA1_HUMAN				803.91	690.17	211.78	4	3	0	0	0	2	3	2		32923	F-actin-capping protein subunit alpha-1 OS=Homo sapiens OX=9606 GN=CAPZA1 PE=1 SV=3
1236	1071	Q9BTY2|FUCO2_HUMAN	740.69	670.98	402.09				4	4	4	3	1	0	0	0		54067	Plasma alpha-L-fucosidase OS=Homo sapiens OX=9606 GN=FUCA2 PE=1 SV=2
739	1631	Q76L83|ASXL2_HUMAN	279.24	178.82	136.77	20169	236.14	278.31	7	4	9	5	10	6	4	7	Oxidation (M)	153819	Putative Polycomb group protein ASXL2 OS=Homo sapiens OX=9606 GN=ASXL2 PE=1 SV=1
1105	1341	O95445|APOM_HUMAN	501.87	0	326.47	518.82	368.05	301.1	5	5	4	3	1	1	3	2	Carbamidomethylation	21253	Apolipoprotein M OS=Homo sapiens OX=9606 GN=APOM PE=1 SV=2
1021	789	P20618|PSB1_HUMAN	662.7	809.33	0	871.79	1022.6	573.89	6	6	5	5	4	1	2	1	Carbamidomethylation	26489	Proteasome subunit beta type-1 OS=Homo sapiens OX=9606 GN=PSMB1 PE=1 SV=2
859	926	O95084|PRS23_HUMAN	2542.1	1734.1	1515.5	0	0		5	5	10	7	10	1	1	0	Carbamidomethylation	43001	Serine protease 23 OS=Homo sapiens OX=9606 GN=PRSS23 PE=1 SV=1
892	1337	Q8NI22|MCFD2_HUMAN	3476.4	9163.5	3799.9				3	3	6	13	7	0	0	0	Oxidation (M)	16390	Multiple coagulation factor deficiency protein 2 OS=Homo sapiens OX=9606 GN=MCFD2 PE=1 SV=1
1069	1076	A0A075B6I1|LV460_HUMAN				431.09	1297.3	0	4	3	0	0	0	4	6	5	Carbamidomethylation	12987	Immunoglobulin lambda variable 4-60 OS=Homo sapiens OX=9606 GN=IGLV4-60 PE=3 SV=1
988	1404	Q16653|MOG_HUMAN	1527.4	1447.6	81650	0			4	4	4	7	8	1	0	0	Carbamidomethylation	28193	Myelin-oligodendrocyte glycoprotein OS=Homo sapiens OX=9606 GN=MOG PE=1 SV=2
1240	919	P55291|CAD15_HUMAN	0	185.99	0				4	4	1	5	2	0	0	0	Carbamidomethylation	88916	Cadherin-15 OS=Homo sapiens OX=9606 GN=CDH15 PE=1 SV=1
991	1117	P29762|RABP1_HUMAN	661.77	610.54	276.58				4	4	9	6	5	0	0	0	Carbamidomethylation	15566	Cellular retinoic acid-binding protein 1 OS=Homo sapiens OX=9606 GN=CRABP1 PE=1 SV=2
1117	1387	P84243|H33_HUMAN	0	0		1935.5	1915.1	0	3	1	1	2	1	2	4	3	Carbamidomethylation	15328	Histone H3.3 OS=Homo sapiens OX=9606 GN=H3F3A PE=1 SV=2
1307	1041	P24821|TENA_HUMAN				1070.3	313.57	333.54	4	4	0	0	0	3	1	2		240851	Tenascin OS=Homo sapiens OX=9606 GN=TNC PE=1 SV=3
1250	1296	Q8IW75|SPA12_HUMAN				578.61	0	499.8	4	4	0	0	0	4	1	3	Oxidation (M)	47175	Serpin A12 OS=Homo sapiens OX=9606 GN=SERPINA12 PE=1 SV=1
1027	779	O75752|B3GL1_HUMAN	1257.2	2902.5	1035.3				6	6	5	8	5	0	0	0	Carbamidomethylation	39512	UDP-GalNAc:beta-1 3-N-acetylgalactosaminyltransferase 1 OS=Homo sapiens OX=9606 GN=B3GALNT1 PE=1 SV=1
1057	936	Q7Z7H5|TMED4_HUMAN	2627	1935.7	1967.2				4	4	6	7	3	0	0	0	Carbamidomethylation	25943	Transmembrane emp24 domain-containing protein 4 OS=Homo sapiens OX=9606 GN=TMED4 PE=1 SV=1
938	1099	P52797|EFNA3_HUMAN	1931.9	2293.2	1753.5	2445	5512.5	608.61	4	4	2	1	1	5	7	7	Carbamidomethylation	26350	Ephrin-A3 OS=Homo sapiens OX=9606 GN=EFNA3 PE=1 SV=1
1172	1332	P01178|NEU1_HUMAN	789.86	1331.4	0				3	3	4	5	2	0	0	0	Carbamidomethylation	12722	Oxytocin-neurophysin 1 OS=Homo sapiens OX=9606 GN=OXT PE=1 SV=1
910	1123	O95158|NXPH4_HUMAN	9052.8	8254.6	7608.4	1001.6	1357.1		5	5	9	6	7	1	2	0	Carbamidomethylation	33065	Neurexophilin-4 OS=Homo sapiens OX=9606 GN=NXPH4 PE=2 SV=3
863	932	P16403|H12_HUMAN	180.76					622.68	5	1	6	5	5	3	4	6	Acetylation (Protein N-term)	21365	Histone H1.2 OS=Homo sapiens OX=9606 GN=HIST1H1C PE=1 SV=2
1291	1290	Q9NXS2|QPCTL_HUMAN		0		831.67	5251.5	369.86	4	4	0	1	0	3	2	1	Carbamidomethylation	42924	Glutaminyl-peptide cyclotransferase-like protein OS=Homo sapiens OX=9606 GN=QPCTL PE=1 SV=2
1045	894	Q9NZK5|ADA2_HUMAN				1880.5	2185.8	548.93	5	5	0	0	0	5	9	3		58934	Adenosine deaminase 2 OS=Homo sapiens OX=9606 GN=ADA2 PE=1 SV=2
1136	944	P98153|IDD_HUMAN	576.38	0	217.32		0		5	5	2	4	5	0	1	0	Carbamidomethylation	60811	Integral membrane protein DGCR2/IDD OS=Homo sapiens OX=9606 GN=DGCR2 PE=1 SV=1
1318	1234	P35590|TIE1_HUMAN				999.04	237.91		3	3	0	0	0	4	2	0	Carbamidomethylation	125090	Tyrosine-protein kinase receptor Tie-1 OS=Homo sapiens OX=9606 GN=TIE1 PE=1 SV=1
992	907	O60512|B4GT3_HUMAN	443.95	889.07	0	1756.1	1465.1	1441.1	5	5	6	4	2	4	2	2	Carbamidomethylation	43928	Beta-1 4-galactosyltransferase 3 OS=Homo sapiens OX=9606 GN=B4GALT3 PE=1 SV=2
1163	1291	P13686|PPA5_HUMAN				1265.2	1324.8	3268.1	3	3	0	0	0	4	2	5		36599	Tartrate-resistant acid phosphatase type 5 OS=Homo sapiens OX=9606 GN=ACP5 PE=1 SV=3
907	1380	P06881|CALCA_HUMAN	0	0	63.355				3	2	7	8	6	1	1	2		13899	Calcitonin gene-related peptide 1 OS=Homo sapiens OX=9606 GN=CALCA PE=1 SV=4
1035	1198	Q9NTU7|CBLN4_HUMAN	212.86	239.28		7065.5	4972	6947.2	4	4	3	1	0	7	4	3	Carbamidomethylation	21808	Cerebellin-4 OS=Homo sapiens OX=9606 GN=CBLN4 PE=1 SV=1
1220	1758	Q6NUJ2|CK087_HUMAN	3611.3	3624.5	3612.1				3	3	3	3	3	0	0	0	Carbamidomethylation	20623	Uncharacterized protein C11orf87 OS=Homo sapiens OX=9606 GN=C11orf87 PE=1 SV=2
997	1068	Q5VV43|K0319_HUMAN	371.74	1162.8	308	812.77	334.69		4	4	4	7	5	2	1	0	Carbamidomethylation	117763	Dyslexia-associated protein KIAA0319 OS=Homo sapiens OX=9606 GN=KIAA0319 PE=1 SV=1
971	1001	O15400|STX7_HUMAN	0	0	0	13051	6860	4779	5	5	2	3	1	6	4	5	Carbamidomethylation; Acetylation (Protein N-term)	29816	Syntaxin-7 OS=Homo sapiens OX=9606 GN=STX7 PE=1 SV=4
866	732	Q8WY21|SORC1_HUMAN	894.2	1000.2	794.08	6576.1	11296	8556.9	7	6	2	2	3	5	7	9		129635	VPS10 domain-containing receptor SorCS1 OS=Homo sapiens OX=9606 GN=SORCS1 PE=1 SV=3
1146	1042	Q9ULX7|CAH14_HUMAN				571.96	1582.8	0	5	5	0	0	0	4	5	3		37668	Carbonic anhydrase 14 OS=Homo sapiens OX=9606 GN=CA14 PE=1 SV=1
995	1424	P13497|BMP1_HUMAN	804.64	886.35	744.2	2422.2	2618.9	1324.9	3	3	5	4	2	3	3	2		111249	Bone morphogenetic protein 1 OS=Homo sapiens OX=9606 GN=BMP1 PE=1 SV=2
828	1205	A0A075B6I0|LV861_HUMAN	0	2078.9	0	37120	42494	29359	6	6	1	3	1	11	8	8		12814	Immunoglobulin lambda variable 8-61 OS=Homo sapiens OX=9606 GN=IGLV8-61 PE=3 SV=7
935	1226	A6NL88|SHSA7_HUMAN	265.95	75.573	0	1150.3	1078.3	795.62	3	3	2	4	1	6	5	5	Carbamidomethylation	56214	Protein shisa-7 OS=Homo sapiens OX=9606 GN=SHISA7 PE=2 SV=3
1042	695	P78417|GSTO1_HUMAN		0	0	1421.1	1329.9	775.04	8	8	0	1	1	5	4	6	Carbamidomethylation	27566	Glutathione S-transferase omega-1 OS=Homo sapiens OX=9606 GN=GSTO1 PE=1 SV=2
1107	1324	Q8WUA8|TSK_HUMAN	0	0	254.91	1050.3	1385.1	866.73	3	3	4	1	1	4	3	1	Carbamidomethylation	37807	Tsukushin OS=Homo sapiens OX=9606 GN=TSKU PE=2 SV=3
957	974	O75093|SLIT1_HUMAN	14388	15936	9971.4	695.71	796.42	94.317	4	4	3	2	5	3	6	2	Carbamidomethylation	167925	Slit homolog 1 protein OS=Homo sapiens OX=9606 GN=SLIT1 PE=2 SV=4
1308	1191	P78536|ADA17_HUMAN	1065.1	1232.1	850.16				3	3	2	3	1	0	0	0		93021	Disintegrin and metalloproteinase domain-containing protein 17 OS=Homo sapiens OX=9606 GN=ADAM17 PE=1 SV=1
803	1496	P50281|MMP14_HUMAN	5381	6952.6	3678.7	16086	16645	12918	2	2	4	6	5	6	7	6		65894	Matrix metalloproteinase-14 OS=Homo sapiens OX=9606 GN=MMP14 PE=1 SV=3
1108	1081	P49746|TSP3_HUMAN				0			4	1	1	2	1	4	2	3	Carbamidomethylation	104201	Thrombospondin-3 OS=Homo sapiens OX=9606 GN=THBS3 PE=1 SV=1
944	1017	O14960|LECT2_HUMAN				6383.2	9792.8	7861.9	5	5	0	0	0	9	6	8	Carbamidomethylation	16390	Leukocyte cell-derived chemotaxin-2 OS=Homo sapiens OX=9606 GN=LECT2 PE=1 SV=2
1245	1261	Q9NZ53|PDXL2_HUMAN	560.5	375.59	4025				4	4	3	3	2	0	0	0	Carbamidomethylation	65076	Podocalyxin-like protein 2 OS=Homo sapiens OX=9606 GN=PODXL2 PE=1 SV=1
861	942	Q96ID5|IGS21_HUMAN	848.19	1306.6	1037.5		388.62		5	5	9	8	11	0	1	0	Carbamidomethylation	51835	Immunoglobulin superfamily member 21 OS=Homo sapiens OX=9606 GN=IGSF21 PE=2 SV=1
1023	1250	Q14195|DPYL3_HUMAN				212.65	645.36	727.15	3	1	3	1	1	3	4	6	Carbamidomethylation	61963	Dihydropyrimidinase-related protein 3 OS=Homo sapiens OX=9606 GN=DPYSL3 PE=1 SV=1
1193	1126	Q99519|NEUR1_HUMAN	0	819.03	229.55				4	4	3	4	3	0	0	0	Carbamidomethylation	45467	Sialidase-1 OS=Homo sapiens OX=9606 GN=NEU1 PE=1 SV=1
1078	1151	P84077|ARF1_HUMAN	869.57	693.04	177.39	808.86	562.71	354.78	4	4	7	1	4	1	1	1		20697	ADP-ribosylation factor 1 OS=Homo sapiens OX=9606 GN=ARF1 PE=1 SV=2
1078	1156	P61204|ARF3_HUMAN	869.57	693.04	177.39	808.86	562.71	354.78	4	4	7	1	4	1	1	1		20601	ADP-ribosylation factor 3 OS=Homo sapiens OX=9606 GN=ARF3 PE=1 SV=2
1128	1112	Q5VU97|CAHD1_HUMAN	241.59	670.07	152.62				3	3	4	5	3	0	0	0		142289	VWFA and cache domain-containing protein 1 OS=Homo sapiens OX=9606 GN=CACHD1 PE=2 SV=2
1353	1489	Q14563|SEM3A_HUMAN					877.52	0	2	2	0	0	0	0	3	2	Carbamidomethylation	88889	Semaphorin-3A OS=Homo sapiens OX=9606 GN=SEMA3A PE=1 SV=1
1287	1094	Q14696|MESD_HUMAN				181.04	1074.7	384.2	4	4	0	0	0	2	4	1	Carbamidomethylation	26077	LRP chaperone MESD OS=Homo sapiens OX=9606 GN=MESD PE=1 SV=2
1124	1174	P52758|RIDA_HUMAN	367.88	797.99	812.93	408.13		587.73	4	4	4	4	3	1	0	1	Carbamidomethylation	14494	2-iminobutanoate/2-iminopropanoate deaminase OS=Homo sapiens OX=9606 GN=RIDA PE=1 SV=1
966	1292	P14415|AT1B2_HUMAN	0	0	0	3579	4120.7	1879.8	3	3	2	2	2	5	5	5	Carbamidomethylation	33367	Sodium/potassium-transporting ATPase subunit beta-2 OS=Homo sapiens OX=9606 GN=ATP1B2 PE=1 SV=3
1241	1283	P54756|EPHA5_HUMAN	0		659.57				3	2	3	2	3	0	0	0	Carbamidomethylation	114803	Ephrin type-A receptor 5 OS=Homo sapiens OX=9606 GN=EPHA5 PE=1 SV=3
1147	1350	P07108|ACBP_HUMAN	2996.1	4357.7	3213				3	3	6	4	2	0	0	0		10044	Acyl-CoA-binding protein OS=Homo sapiens OX=9606 GN=DBI PE=1 SV=2
713	1204	Q6KB66|K2C80_HUMAN			0		278.5		4	2	3	6	6	10	13	8		50525	Keratin type II cytoskeletal 80 OS=Homo sapiens OX=9606 GN=KRT80 PE=1 SV=2
1166	1364	P61266|STX1B_HUMAN				1554.1	1920.5	1352.4	3	3	0	0	0	4	3	4		33245	Syntaxin-1B OS=Homo sapiens OX=9606 GN=STX1B PE=1 SV=1
1048	1356	P59666|DEF3_HUMAN	1512.4	838.47	384.44	914.73	1615.9	563.01	4	4	4	2	3	2	4	2	Carbamidomethylation	10245	Neutrophil defensin 3 OS=Homo sapiens OX=9606 GN=DEFA3 PE=1 SV=1
1048	1357	P59665|DEF1_HUMAN	1512.4	838.47	384.44	914.73	1615.9	563.01	4	4	4	2	3	2	4	2	Carbamidomethylation	10201	Neutrophil defensin 1 OS=Homo sapiens OX=9606 GN=DEFA1 PE=1 SV=1
1161	1165	O00115|DNS2A_HUMAN				3201.3	2322.3	2506	5	5	0	0	0	2	4	5	Carbamidomethylation	39581	Deoxyribonuclease-2-alpha OS=Homo sapiens OX=9606 GN=DNASE2 PE=1 SV=2
970	1257	Q13103|SPP24_HUMAN	774.92	872.52	488.52	803.3	1600.1	565.79	3	3	7	4	4	2	3	1	Carbamidomethylation	24338	Secreted phosphoprotein 24 OS=Homo sapiens OX=9606 GN=SPP2 PE=1 SV=1
1153	1035	Q6ZRP7|QSOX2_HUMAN	0	364.35	242.15	326.67	512.62	56091	4	4	1	2	2	1	1	4	Carbamidomethylation; Acetylation (Protein N-term)	77529	Sulfhydryl oxidase 2 OS=Homo sapiens OX=9606 GN=QSOX2 PE=1 SV=3
900	1129	A0A0A0MS14|HV145_HUMAN				2310.2	3000.5	569.27	6	3	0	0	0	7	10	8	Carbamidomethylation; Acetylation (Protein N-term)	13508	Immunoglobulin heavy variable 1-45 OS=Homo sapiens OX=9606 GN=IGHV1-45 PE=3 SV=1
1001	912	Q10472|GALT1_HUMAN	0	0	0	1135.7	1124.9	3391.6	5	4	2	2	1	7	3	4	Carbamidomethylation	64219	Polypeptide N-acetylgalactosaminyltransferase 1 OS=Homo sapiens OX=9606 GN=GALNT1 PE=1 SV=1
1274	1301	Q9UBS4|DJB11_HUMAN		0		1238.9	768.85	2117.8	3	3	0	2	0	2	1	2		40514	DnaJ homolog subfamily B member 11 OS=Homo sapiens OX=9606 GN=DNAJB11 PE=1 SV=1
1237	1075	O60245|PCDH7_HUMAN	109.58	717.26	0		215.6		4	4	1	3	2	0	2	0		116071	Protocadherin-7 OS=Homo sapiens OX=9606 GN=PCDH7 PE=1 SV=2
1348	1213	P82987|ATL3_HUMAN	82.85		63.491		2296.5		3	3	1	0	1	0	3	0	Carbamidomethylation	188691	ADAMTS-like protein 3 OS=Homo sapiens OX=9606 GN=ADAMTSL3 PE=1 SV=4
1175	1305	Q96EE4|CC126_HUMAN	681.59	715.35	606.18	384.56	271.87		4	3	1	4	4	1	1	0		15668	Coiled-coil domain-containing protein 126 OS=Homo sapiens OX=9606 GN=CCDC126 PE=2 SV=2
768	1644	P55011|S12A2_HUMAN		125.51					6	1	7	6	9	4	3	8		131447	Solute carrier family 12 member 2 OS=Homo sapiens OX=9606 GN=SLC12A2 PE=1 SV=1
1143	1051	P14384|CBPM_HUMAN				640.25	700.37	766.09	4	4	0	0	0	5	3	4	Carbamidomethylation	50514	Carboxypeptidase M OS=Homo sapiens OX=9606 GN=CPM PE=1 SV=2
1141	1203	Q15846|CLUL1_HUMAN	109.72	529.57		275.23	1523.2		3	3	1	4	0	3	4	0	Carbamidomethylation	54215	Clusterin-like protein 1 OS=Homo sapiens OX=9606 GN=CLUL1 PE=2 SV=1
943	1214	P51674|GPM6A_HUMAN	2353	1978.4	1521.4	1717.5	2160.7	1718.1	3	3	7	3	4	3	3	3	Carbamidomethylation	31210	Neuronal membrane glycoprotein M6-a OS=Homo sapiens OX=9606 GN=GPM6A PE=1 SV=2
835	1115	P55287|CAD11_HUMAN	161.04	264.18		7240.3	6718.2	6663.9	4	3	3	3	1	9	11	4		87965	Cadherin-11 OS=Homo sapiens OX=9606 GN=CDH11 PE=1 SV=2
1095	1023	P30530|UFO_HUMAN	1956.5	1894.5	1263.7				4	4	3	8	3	0	0	0	Carbamidomethylation	98337	Tyrosine-protein kinase receptor UFO OS=Homo sapiens OX=9606 GN=AXL PE=1 SV=4
852	1212	Q6ZSJ9|SHSA6_HUMAN	387.77	294.16	0	20967	24211	21298	5	5	1	1	1	10	9	8		55764	Protein shisa-6 OS=Homo sapiens OX=9606 GN=SHISA6 PE=1 SV=2
1400	1612	Q9H3S1|SEM4A_HUMAN				587.36	807.52		2	2	0	0	0	2	2	0		83574	Semaphorin-4A OS=Homo sapiens OX=9606 GN=SEMA4A PE=1 SV=2
1062	1054	P11226|MBL2_HUMAN				1904.6	1697.3	1628.4	4	4	0	0	0	6	3	7	Carbamidomethylation	26144	Mannose-binding protein C OS=Homo sapiens OX=9606 GN=MBL2 PE=1 SV=2
1014	1508	Q16553|LY6E_HUMAN	15982	17878	14527				4	4	5	10	4	0	0	0	Carbamidomethylation; Oxidation (M)	13507	Lymphocyte antigen 6E OS=Homo sapiens OX=9606 GN=LY6E PE=2 SV=1
1053	1167	Q9Y5F8|PCDGJ_HUMAN					1116.8		4	1	0	1	0	4	6	5	Carbamidomethylation	100974	Protocadherin gamma-B7 OS=Homo sapiens OX=9606 GN=PCDHGB7 PE=2 SV=1
853	1173	P10599|THIO_HUMAN	9881.1	10899	7981.1	8049.8	9493.1	7927.1	4	4	7	5	5	5	4	4	Carbamidomethylation	11737	Thioredoxin OS=Homo sapiens OX=9606 GN=TXN PE=1 SV=3
972	1037	Q5BLP8|CD048_HUMAN	9645.1	8262.7	5128				6	6	6	10	5	0	0	0	Carbamidomethylation	10170	Neuropeptide-like protein C4orf48 OS=Homo sapiens OX=9606 GN=C4orf48 PE=1 SV=3
940	921	P61604|CH10_HUMAN	451.77	514.74	494.22	6967.3	6001	5112.9	4	4	2	5	3	4	4	5		10932	10 kDa heat shock protein mitochondrial OS=Homo sapiens OX=9606 GN=HSPE1 PE=1 SV=2
1036	1087	P11717|MPRI_HUMAN	83.312			373.95	106.88	475.6	4	3	3	1	0	5	4	4	Carbamidomethylation	274373	Cation-independent mannose-6-phosphate receptor OS=Homo sapiens OX=9606 GN=IGF2R PE=1 SV=3
1185	1045	O14657|TOR1B_HUMAN				0	191.29	0	4	3	0	0	0	4	5	1		37979	Torsin-1B OS=Homo sapiens OX=9606 GN=TOR1B PE=1 SV=2
1235	1065	Q8NBJ7|SUMF2_HUMAN				1475.7	1246.1	0	4	4	0	0	0	4	3	1		33843	Inactive C-alpha-formylglycine-generating enzyme 2 OS=Homo sapiens OX=9606 GN=SUMF2 PE=1 SV=2
1159	1381	Q71DI3|H32_HUMAN				0	884.36	0	3	1	0	1	1	2	4	3	Carbamidomethylation	15388	Histone H3.2 OS=Homo sapiens OX=9606 GN=HIST2H3A PE=1 SV=3
1280	987	P55786|PSA_HUMAN				397.3	1084.8	148.75	4	4	0	0	0	4	2	1		103276	Puromycin-sensitive aminopeptidase OS=Homo sapiens OX=9606 GN=NPEPPS PE=1 SV=2
1188	808	P55285|CADH6_HUMAN	281.36	429.63	175.56	2807.3		1672.8	5	5	2	4	1	2	0	1		88309	Cadherin-6 OS=Homo sapiens OX=9606 GN=CDH6 PE=1 SV=1
1015	1027	P55008|AIF1_HUMAN				5246.7	4259.7	1825.5	5	5	0	0	0	7	6	6		16703	Allograft inflammatory factor 1 OS=Homo sapiens OX=9606 GN=AIF1 PE=1 SV=1
732	1168	P41271|NBL1_HUMAN	33299	36650	24845	322.95	0	0	4	4	8	14	10	4	3	3	Carbamidomethylation; Oxidation (M)	19408	Neuroblastoma suppressor of tumorigenicity 1 OS=Homo sapiens OX=9606 GN=NBL1 PE=1 SV=2
994	1150	Q9NS85|CAH10_HUMAN	232.3	0	0	2223.4	2415.2	1703	4	4	2	1	1	7	6	3		37563	Carbonic anhydrase-related protein 10 OS=Homo sapiens OX=9606 GN=CA10 PE=2 SV=1
855	1327	A0A0B4J1Y8|LV949_HUMAN				27363	31359	16654	5	5	0	0	0	9	13	8		13024	Immunoglobulin lambda variable 9-49 OS=Homo sapiens OX=9606 GN=IGLV9-49 PE=1 SV=1
1179	1219	O43157|PLXB1_HUMAN	119.67	386.76	0	646.82		441.64	3	3	3	4	1	1	0	1	Carbamidomethylation	232296	Plexin-B1 OS=Homo sapiens OX=9606 GN=PLXNB1 PE=1 SV=3
1158	1238	Q13790|APOF_HUMAN	435.28	120.06	0				3	3	5	5	1	0	0	0	Carbamidomethylation	35400	Apolipoprotein F OS=Homo sapiens OX=9606 GN=APOF PE=1 SV=2
1093	1248	Q8N0W4|NLGNX_HUMAN	1130.9		944.65	484.78	775.18	311.27	3	2	5	3	2	1	2	1		91915	Neuroligin-4 X-linked OS=Homo sapiens OX=9606 GN=NLGN4X PE=1 SV=1
1093	1273	Q8NFZ3|NLGNY_HUMAN	1130.9		944.65	484.78	775.18	311.27	3	2	5	3	2	1	2	1		92020	Neuroligin-4 Y-linked OS=Homo sapiens OX=9606 GN=NLGN4Y PE=2 SV=1
954	920	P60981|DEST_HUMAN	314.13	560.29	345.95	4429.3	4554.1	3066.1	5	4	1	2	1	7	5	6	Carbamidomethylation; Acetylation (Protein N-term)	18506	Destrin OS=Homo sapiens OX=9606 GN=DSTN PE=1 SV=3
1145	1312	O60883|G37L1_HUMAN	3314.9	3009.9	2715.3	4328.8	2349.5	1727.5	4	4	2	3	1	3	2	1		52771	G-protein coupled receptor 37-like 1 OS=Homo sapiens OX=9606 GN=GPR37L1 PE=1 SV=2
1173	1348	P0DJI8|SAA1_HUMAN	595.64	508.78	0				3	3	3	6	2	0	0	0		13532	Serum amyloid A-1 protein OS=Homo sapiens OX=9606 GN=SAA1 PE=1 SV=1
1070	1230	Q13228|SBP1_HUMAN	117.87	691.54	351	1269.8	802.11	536.17	3	3	3	3	3	3	2	1		52391	Methanethiol oxidase OS=Homo sapiens OX=9606 GN=SELENBP1 PE=1 SV=2
1190	1164	P00918|CAH2_HUMAN	275.71	0	398.39				3	3	4	3	3	0	0	0		29246	Carbonic anhydrase 2 OS=Homo sapiens OX=9606 GN=CA2 PE=1 SV=2
1214	783	Q08188|TGM3_HUMAN				310.25	596.98	0	6	6	0	0	0	2	4	3	Carbamidomethylation	76632	Protein-glutamine gamma-glutamyltransferase E OS=Homo sapiens OX=9606 GN=TGM3 PE=1 SV=4
1083	1163	Q9UBR2|CATZ_HUMAN	212.04	1017.2	259.13				4	4	3	7	5	0	0	0	Carbamidomethylation	33868	Cathepsin Z OS=Homo sapiens OX=9606 GN=CTSZ PE=1 SV=1
1149	1799	P04732|MT1E_HUMAN					0		2	1	2	2	2	2	2	2	Carbamidomethylation; Acetylation (Protein N-term)	6014	Metallothionein-1E OS=Homo sapiens OX=9606 GN=MT1E PE=1 SV=1
1127	1193	P02144|MYG_HUMAN				720.55	522.39	181.92	4	4	0	0	0	4	5	4		17184	Myoglobin OS=Homo sapiens OX=9606 GN=MB PE=1 SV=2
953	875	P16949|STMN1_HUMAN		0	0	6437.9	11311	9066.4	6	6	0	1	1	6	7	7		17302	Stathmin OS=Homo sapiens OX=9606 GN=STMN1 PE=1 SV=3
1242	1235	P22626|ROA2_HUMAN	0				949.64	392.22	3	3	3	0	0	0	4	1		37430	Heterogeneous nuclear ribonucleoproteins A2/B1 OS=Homo sapiens OX=9606 GN=HNRNPA2B1 PE=1 SV=2
1217	1308	Q9NP84|TNR12_HUMAN	2226.3	1966.1	886.96				3	3	2	4	3	0	0	0	Carbamidomethylation	13911	Tumor necrosis factor receptor superfamily member 12A OS=Homo sapiens OX=9606 GN=TNFRSF12A PE=1 SV=1
1218	1306	P20382|MCH_HUMAN	0	522.53	404.66				3	3	2	4	3	0	0	0		18679	Pro-MCH OS=Homo sapiens OX=9606 GN=PMCH PE=1 SV=3
1294	1186	Q14894|CRYM_HUMAN	0	96.575	0				4	4	1	4	2	0	0	0		33776	Ketimine reductase mu-crystallin OS=Homo sapiens OX=9606 GN=CRYM PE=1 SV=1
1295	1210	P46459|NSF_HUMAN	0	0		1481.4	1935.2	953.93	3	3	1	1	0	2	1	2	Carbamidomethylation	82594	Vesicle-fusing ATPase OS=Homo sapiens OX=9606 GN=NSF PE=1 SV=3
1140	1060	P0DP24|CALM2_HUMAN	3399	3833.4	2969				4	4	4	3	5	0	0	0	Acetylation (Protein N-term)	16838	Calmodulin-2 OS=Homo sapiens OX=9606 GN=CALM2 PE=1 SV=1
1140	1061	P0DP23|CALM1_HUMAN	3399	3833.4	2969				4	4	4	3	5	0	0	0	Acetylation (Protein N-term)	16838	Calmodulin-1 OS=Homo sapiens OX=9606 GN=CALM1 PE=1 SV=1
1140	1062	P0DP25|CALM3_HUMAN	3399	3833.4	2969				4	4	4	3	5	0	0	0	Acetylation (Protein N-term)	16838	Calmodulin-3 OS=Homo sapiens OX=9606 GN=CALM3 PE=1 SV=1
1303	1351	Q6ZMI3|GLDN_HUMAN				1773.3	392.96	538.21	3	3	0	0	0	5	1	1		58957	Gliomedin OS=Homo sapiens OX=9606 GN=GLDN PE=1 SV=1
1079	1282	P60660|MYL6_HUMAN	410.68	344.82	0	1060.7	1034.3	372.28	3	3	4	2	1	2	3	3		16930	Myosin light polypeptide 6 OS=Homo sapiens OX=9606 GN=MYL6 PE=1 SV=2
773	1383	A0A075B6K2|LV312_HUMAN					699.91		5	1	3	2	1	9	12	10	Carbamidomethylation; Acetylation (Protein N-term)	12387	Immunoglobulin lambda variable 3-12 OS=Homo sapiens OX=9606 GN=IGLV3-12 PE=3 SV=2
890	889	P45877|PPIC_HUMAN	238.42		480.53	6823	6263.1	5404.2	7	7	1	0	4	10	4	7		22763	Peptidyl-prolyl cis-trans isomerase C OS=Homo sapiens OX=9606 GN=PPIC PE=1 SV=1
1099	1782	O95292|VAPB_HUMAN				0	449.7	0	3	2	0	0	0	5	3	6		27228	Vesicle-associated membrane protein-associated protein B/C OS=Homo sapiens OX=9606 GN=VAPB PE=1 SV=3
1204	1589	P22223|CADH3_HUMAN	0	128.22		614.05	854.51	381.58	3	3	2	1	0	2	2	2	Carbamidomethylation	91418	Cadherin-3 OS=Homo sapiens OX=9606 GN=CDH3 PE=1 SV=2
1114	1053	O94991|SLIK5_HUMAN				230.41	341.58	18480	4	3	2	0	0	4	2	5	Carbamidomethylation	107486	SLIT and NTRK-like protein 5 OS=Homo sapiens OX=9606 GN=SLITRK5 PE=2 SV=2
1381	1304	Q9HCY8|S10AE_HUMAN		0	0	285.28	638.01		3	3	0	1	1	1	2	0	Carbamidomethylation	11662	Protein S100-A14 OS=Homo sapiens OX=9606 GN=S100A14 PE=1 SV=1
1073	1044	Q96P63|SPB12_HUMAN		238.25		577.47	479.46		5	4	3	3	3	2	3	1	Carbamidomethylation	46276	Serpin B12 OS=Homo sapiens OX=9606 GN=SERPINB12 PE=1 SV=1
1131	1666	P41439|FOLR3_HUMAN	0	0		348.16	365.51	0	2	2	1	1	0	4	3	3	Carbamidomethylation	27884	Folate receptor gamma OS=Homo sapiens OX=9606 GN=FOLR3 PE=1 SV=2
1131	1728	P14207|FOLR2_HUMAN	0	0		348.16	365.51	0	2	2	1	1	0	4	3	3	Carbamidomethylation	29280	Folate receptor beta OS=Homo sapiens OX=9606 GN=FOLR2 PE=1 SV=4
1270	1197	P61158|ARP3_HUMAN				984.43	1741.2	834.28	3	3	0	0	0	1	4	2	Carbamidomethylation	47371	Actin-related protein 3 OS=Homo sapiens OX=9606 GN=ACTR3 PE=1 SV=3
917	1340	P04233|HG2A_HUMAN	832.25	866.1	618.12	1306.1	845.19	527.29	3	3	5	6	7	1	3	2		33516	HLA class II histocompatibility antigen gamma chain OS=Homo sapiens OX=9606 GN=CD74 PE=1 SV=3
1074	1266	Q7Z5L7|PODN_HUMAN	0	244.27		1685	2004.1	1418.8	4	4	2	2	0	5	3	3		68976	Podocan OS=Homo sapiens OX=9606 GN=PODN PE=1 SV=2
1165	1007	P15151|PVR_HUMAN	176.99	319.45	282.3				5	5	5	4	2	0	0	0		45303	Poliovirus receptor OS=Homo sapiens OX=9606 GN=PVR PE=1 SV=2
1401	1635	O15143|ARC1B_HUMAN				542.53	880.27	234.06	2	2	0	0	0	1	2	1	Carbamidomethylation	40950	Actin-related protein 2/3 complex subunit 1B OS=Homo sapiens OX=9606 GN=ARPC1B PE=1 SV=3
1208	1272	Q99538|LGMN_HUMAN	316.86	0	60.136	554.46	0		3	3	3	2	2	1	1	0		49411	Legumain OS=Homo sapiens OX=9606 GN=LGMN PE=1 SV=1
1231	1402	Q05996|ZP2_HUMAN	2932.5	2236.2	1559.4				2	2	3	2	3	0	0	0		82357	Zona pellucida sperm-binding protein 2 OS=Homo sapiens OX=9606 GN=ZP2 PE=1 SV=1
1151	1375	P01591|IGJ_HUMAN	0	0	0	3712.9	4689.4	2718.4	3	3	2	1	1	3	3	2	Carbamidomethylation	18099	Immunoglobulin J chain OS=Homo sapiens OX=9606 GN=JCHAIN PE=1 SV=4
1100	1209	P07492|GRP_HUMAN	0	40209	0	59741	1192.9	0	3	3	2	3	2	3	1	3		16213	Gastrin-releasing peptide OS=Homo sapiens OX=9606 GN=GRP PE=1 SV=2
1243	1240	Q9UF33|EPHA6_HUMAN				670.02	756	434	3	3	0	0	0	2	4	2	Carbamidomethylation	116379	Ephrin type-A receptor 6 OS=Homo sapiens OX=9606 GN=EPHA6 PE=2 SV=3
1077	1596	Q8N3Z0|PRS35_HUMAN	1338.4	2125.6	1191.4				2	2	4	4	7	0	0	0	Carbamidomethylation	47098	Inactive serine protease 35 OS=Homo sapiens OX=9606 GN=PRSS35 PE=1 SV=2
1110	1208	P17600|SYN1_HUMAN				1706	1400.3	481.42	3	3	0	0	0	7	4	2		74111	Synapsin-1 OS=Homo sapiens OX=9606 GN=SYN1 PE=1 SV=3
1009	1624	P01127|PDGFB_HUMAN	5665.8	6861	5461.5				2	2	7	7	5	0	0	0		27283	Platelet-derived growth factor subunit B OS=Homo sapiens OX=9606 GN=PDGFB PE=1 SV=1
1088	1378	Q9Y5G0|PCDGH_HUMAN					18745		3	1	0	0	0	4	5	5	Acetylation (Protein N-term)	99875	Protocadherin gamma-B5 OS=Homo sapiens OX=9606 GN=PCDHGB5 PE=2 SV=1
924	1092	P20827|EFNA1_HUMAN	103.15	125.17	0	1074.4	2234.9	312.24	4	4	2	7	5	5	4	1	Carbamidomethylation	23787	Ephrin-A1 OS=Homo sapiens OX=9606 GN=EFNA1 PE=1 SV=2
1075	979	Q86YD3|TMM25_HUMAN	1721.1	7597.4	843.85				5	5	5	6	4	0	0	0		39285	Transmembrane protein 25 OS=Homo sapiens OX=9606 GN=TMEM25 PE=1 SV=1
1234	1216	Q16720|AT2B3_HUMAN	0	342.93	0		218.4	0	3	3	1	3	2	0	1	1		134197	Plasma membrane calcium-transporting ATPase 3 OS=Homo sapiens OX=9606 GN=ATP2B3 PE=1 SV=3
1269	1109	O75339|CILP1_HUMAN				76.633	43.86	0	4	4	0	0	0	2	3	2	Carbamidomethylation	132565	Cartilage intermediate layer protein 1 OS=Homo sapiens OX=9606 GN=CILP PE=1 SV=4
1399	1225	Q8IUC8|GLT13_HUMAN	0	282.05	272.75				3	3	1	2	1	0	0	0	Carbamidomethylation	64051	Polypeptide N-acetylgalactosaminyltransferase 13 OS=Homo sapiens OX=9606 GN=GALNT13 PE=2 SV=2
1186	1202	P55145|MANF_HUMAN				2169	3255.8	2899.5	3	3	0	0	0	2	5	3	Carbamidomethylation	20700	Mesencephalic astrocyte-derived neurotrophic factor OS=Homo sapiens OX=9606 GN=MANF PE=1 SV=3
1251	1674	P04271|S100B_HUMAN	141.94	0	0	554.64	664.59	424.69	2	2	1	1	1	1	2	2		10713	Protein S100-B OS=Homo sapiens OX=9606 GN=S100B PE=1 SV=2
1134	1564	Q8IX30|SCUB3_HUMAN					0		2	1	2	1	2	2	4	1	Carbamidomethylation	109283	Signal peptide CUB and EGF-like domain-containing protein 3 OS=Homo sapiens OX=9606 GN=SCUBE3 PE=1 SV=1
1312	890	O75094|SLIT3_HUMAN				311.12	1110.7	0	5	5	0	0	0	1	4	1	Carbamidomethylation	167712	Slit homolog 3 protein OS=Homo sapiens OX=9606 GN=SLIT3 PE=2 SV=3
1316	1237	P35968|VGFR2_HUMAN				1006.2	346.75	247.66	3	3	0	0	0	3	2	1	Carbamidomethylation	151526	Vascular endothelial growth factor receptor 2 OS=Homo sapiens OX=9606 GN=KDR PE=1 SV=2
983	1236	Q13554|KCC2B_HUMAN	0	0	0	1234.1	840.06	858.17	3	2	3	3	2	5	3	4	Carbamidomethylation	72678	Calcium/calmodulin-dependent protein kinase type II subunit beta OS=Homo sapiens OX=9606 GN=CAMK2B PE=1 SV=3
1320	1330	Q9NZ94|NLGN3_HUMAN	0	63.224	65.575				3	3	1	4	1	0	0	0	Carbamidomethylation	93895	Neuroligin-3 OS=Homo sapiens OX=9606 GN=NLGN3 PE=1 SV=2
1502	1286	P47755|CAZA2_HUMAN					185.57		3	2	0	0	0	0	3	0	Carbamidomethylation	32949	F-actin-capping protein subunit alpha-2 OS=Homo sapiens OX=9606 GN=CAPZA2 PE=1 SV=3
1118	1228	Q9GZX9|TWSG1_HUMAN	0	0	0	251.47	167.95	0	3	3	2	3	1	4	2	1	Carbamidomethylation	25017	Twisted gastrulation protein homolog 1 OS=Homo sapiens OX=9606 GN=TWSG1 PE=1 SV=1
1138	1382	P68431|H31_HUMAN				1823.3	1610.6	0	3	1	0	1	1	2	5	3	Carbamidomethylation; Oxidation (M)	15404	Histone H3.1 OS=Homo sapiens OX=9606 GN=HIST1H3A PE=1 SV=2
1292	1388	P04839|CY24B_HUMAN	677.43	625.12	534.3				3	3	3	2	2	0	0	0	Carbamidomethylation	65336	Cytochrome b-245 heavy chain OS=Homo sapiens OX=9606 GN=CYBB PE=1 SV=2
1262	1379	P61970|NTF2_HUMAN	1097.1	1340.7	679.47				3	3	2	3	3	0	0	0	Carbamidomethylation	14478	Nuclear transport factor 2 OS=Homo sapiens OX=9606 GN=NUTF2 PE=1 SV=1
1116	877	O14917|PCD17_HUMAN	241.86	252.53	0				5	5	6	5	2	0	0	0	Carbamidomethylation	126229	Protocadherin-17 OS=Homo sapiens OX=9606 GN=PCDH17 PE=2 SV=2
1144	1246	Q6UXF1|TM108_HUMAN				1948	2093.3	1258.8	3	3	0	0	0	5	4	3		59948	Transmembrane protein 108 OS=Homo sapiens OX=9606 GN=TMEM108 PE=2 SV=2
1356	1281	O94933|SLIK3_HUMAN				347.54	547.19	345.89	3	2	0	0	0	1	2	2	Carbamidomethylation	108934	SLIT and NTRK-like protein 3 OS=Homo sapiens OX=9606 GN=SLITRK3 PE=2 SV=2
1429	1244	Q7LGC8|CHST3_HUMAN	0			0		886.79	4	4	1	0	0	2	0	1	Carbamidomethylation	54706	Carbohydrate sulfotransferase 3 OS=Homo sapiens OX=9606 GN=CHST3 PE=1 SV=3
914	1171	A0A0C4DH33|HV124_HUMAN				53427	54916		6	1	0	0	0	11	9	4		12824	Immunoglobulin heavy variable 1-24 OS=Homo sapiens OX=9606 GN=IGHV1-24 PE=3 SV=1
1212	1077	O75354|ENTP6_HUMAN				908.25	1572.1	298.3	4	4	0	0	0	3	5	1	Carbamidomethylation	53246	Ectonucleoside triphosphate diphosphohydrolase 6 OS=Homo sapiens OX=9606 GN=ENTPD6 PE=1 SV=3
1337	1477	P04080|CYTB_HUMAN	575.02	611.36	245.41				2	2	1	1	4	0	0	0		11140	Cystatin-B OS=Homo sapiens OX=9606 GN=CSTB PE=1 SV=2
1223	1745	O75487|GPC4_HUMAN				553.14	318.5	776.64	2	2	0	0	0	1	6	2	Carbamidomethylation	62412	Glypican-4 OS=Homo sapiens OX=9606 GN=GPC4 PE=1 SV=4
1376	1342	P15509|CSF2R_HUMAN				894.37	950.13	1248	3	3	0	0	0	1	1	3	Carbamidomethylation	46207	Granulocyte-macrophage colony-stimulating factor receptor subunit alpha OS=Homo sapiens OX=9606 GN=CSF2RA PE=1 SV=1
1293	1775	P63208|SKP1_HUMAN	0	0	299.69				3	3	3	1	3	0	0	0		18658	S-phase kinase-associated protein 1 OS=Homo sapiens OX=9606 GN=SKP1 PE=1 SV=2
1233	1125	Q9NQ38|ISK5_HUMAN				587.51	469.56	407.01	4	4	0	0	0	3	1	4	Carbamidomethylation	120715	Serine protease inhibitor Kazal-type 5 OS=Homo sapiens OX=9606 GN=SPINK5 PE=1 SV=2
1331	1683	Q9H1E1|RNAS7_HUMAN				1543.3	1086.1	359.22	2	2	0	0	0	2	3	1	Carbamidomethylation	17419	Ribonuclease 7 OS=Homo sapiens OX=9606 GN=RNASE7 PE=1 SV=2
978	1059	P31947|1433S_HUMAN		0					4	1	8	5	5	1	1	0	Carbamidomethylation	27774	14-3-3 protein sigma OS=Homo sapiens OX=9606 GN=SFN PE=1 SV=1
1384	1349	O60513|B4GT4_HUMAN		182.58	132.15	370			3	3	0	3	1	1	0	0	Carbamidomethylation	40041	Beta-1 4-galactosyltransferase 4 OS=Homo sapiens OX=9606 GN=B4GALT4 PE=1 SV=1
1199	1334	P05413|FABPH_HUMAN	293.42	444.55	94.758				3	3	4	4	2	0	0	0	Carbamidomethylation; Acetylation (Protein N-term)	14858	Fatty acid-binding protein heart OS=Homo sapiens OX=9606 GN=FABP3 PE=1 SV=4
1272	1520	P38571|LICH_HUMAN	170.83	0	0	0	0	0	2	2	2	1	1	1	1	1		45419	Lysosomal acid lipase/cholesteryl ester hydrolase OS=Homo sapiens OX=9606 GN=LIPA PE=1 SV=2
1142	1552	Q99946|PRRT1_HUMAN	0	0	234.3	9641	11857	6872.7	2	2	1	1	3	2	3	2	Carbamidomethylation	31430	Proline-rich transmembrane protein 1 OS=Homo sapiens OX=9606 GN=PRRT1 PE=2 SV=2
1137	1252	Q9H3U7|SMOC2_HUMAN				401.51	660.54	118.77	3	2	2	1	1	2	3	3	Carbamidomethylation	49674	SPARC-related modular calcium-binding protein 2 OS=Homo sapiens OX=9606 GN=SMOC2 PE=2 SV=2
1207	1055	Q96EU7|C1GLC_HUMAN				1072.8	1111.1	504.54	4	4	0	0	0	3	3	3	Carbamidomethylation	36382	C1GALT1-specific chaperone 1 OS=Homo sapiens OX=9606 GN=C1GALT1C1 PE=1 SV=1
1133	1522	O75874|IDHC_HUMAN				1226.5	1335.1	1241.7	2	2	0	0	0	3	5	4		46659	Isocitrate dehydrogenase [NADP] cytoplasmic OS=Homo sapiens OX=9606 GN=IDH1 PE=1 SV=2
1393	1344	Q13835|PKP1_HUMAN		140.59		0	0		2	2	0	2	0	1	1	0		82861	Plakophilin-1 OS=Homo sapiens OX=9606 GN=PKP1 PE=1 SV=2
1135	1199	Q66K79|CBPZ_HUMAN	0	0	0	0	0		3	3	4	3	1	3	1	0		73655	Carboxypeptidase Z OS=Homo sapiens OX=9606 GN=CPZ PE=1 SV=2
1221	964	P12277|KCRB_HUMAN	426.85	490.08	0				5	5	4	1	3	0	0	0		42644	Creatine kinase B-type OS=Homo sapiens OX=9606 GN=CKB PE=1 SV=1
1192	1345	Q9Y274|SIA10_HUMAN				1795.3	1748.7	1607.9	3	3	0	0	0	4	2	4	Carbamidomethylation	38214	Type 2 lactosamine alpha-2 3-sialyltransferase OS=Homo sapiens OX=9606 GN=ST3GAL6 PE=1 SV=1
1125	1801	P02795|MT2_HUMAN					267.02		2	1	2	2	2	2	3	2	Carbamidomethylation	6042	Metallothionein-2 OS=Homo sapiens OX=9606 GN=MT2A PE=1 SV=1
1125	1805	P13640|MT1G_HUMAN					267.02		2	1	2	2	2	2	3	2	Carbamidomethylation	6141	Metallothionein-1G OS=Homo sapiens OX=9606 GN=MT1G PE=1 SV=2
1125	1809	P80297|MT1X_HUMAN					267.02		2	1	2	2	2	2	3	2	Carbamidomethylation	6068	Metallothionein-1X OS=Homo sapiens OX=9606 GN=MT1X PE=1 SV=1
1102	1201	Q9H0R8|GBRL1_HUMAN				619.29	1361.3	387.62	5	3	0	0	0	5	5	4		14044	Gamma-aminobutyric acid receptor-associated protein-like 1 OS=Homo sapiens OX=9606 GN=GABARAPL1 PE=1 SV=1
990	995	P12830|CADH1_HUMAN	1468.5	1150.9	845.72	1417	2389.4	1419.6	5	5	3	3	3	5	3	3	Carbamidomethylation	97456	Cadherin-1 OS=Homo sapiens OX=9606 GN=CDH1 PE=1 SV=3
1219	1215	O95467|GNAS3_HUMAN				2615.3	4445.7	1649.1	3	3	0	0	0	1	4	4		28029	Neuroendocrine secretory protein 55 OS=Homo sapiens OX=9606 GN=GNAS PE=2 SV=1
1298	1232	P57087|JAM2_HUMAN	698.28	497.54	341420				3	3	2	3	2	0	0	0	Carbamidomethylation	33207	Junctional adhesion molecule B OS=Homo sapiens OX=9606 GN=JAM2 PE=1 SV=1
1373	1536	Q6UX72|B3GN9_HUMAN	0	0	0				2	2	3	1	1	0	0	0		43751	UDP-GlcNAc:betaGal beta-1 3-N-acetylglucosaminyltransferase 9 OS=Homo sapiens OX=9606 GN=B3GNT9 PE=2 SV=1
1187	1331	P35613|BASI_HUMAN	0	315.26	0			0	3	3	1	4	4	0	0	1	Carbamidomethylation	42200	Basigin OS=Homo sapiens OX=9606 GN=BSG PE=1 SV=2
1194	1162	Q4G148|GXLT1_HUMAN				253.58	346.06	275.38	4	4	0	0	0	5	3	2	Carbamidomethylation	50567	Glucoside xylosyltransferase 1 OS=Homo sapiens OX=9606 GN=GXYLT1 PE=1 SV=2
1289	1662	P18075|BMP7_HUMAN					125.56		2	1	2	1	1	0	2	1		49313	Bone morphogenetic protein 7 OS=Homo sapiens OX=9606 GN=BMP7 PE=1 SV=1
1225	1195	P02776|PLF4_HUMAN				1129.2	980.34	788.42	4	4	0	0	0	2	2	5	Carbamidomethylation	10845	Platelet factor 4 OS=Homo sapiens OX=9606 GN=PF4 PE=1 SV=2
1225	1196	P10720|PF4V_HUMAN				1129.2	980.34	788.42	4	4	0	0	0	2	2	5	Carbamidomethylation	11553	Platelet factor 4 variant OS=Homo sapiens OX=9606 GN=PF4V1 PE=1 SV=1
1458	1284	Q9H461|FZD8_HUMAN				1388.1			3	3	0	0	0	3	0	0	Carbamidomethylation	73300	Frizzled-8 OS=Homo sapiens OX=9606 GN=FZD8 PE=1 SV=1
1121	1102	O00299|CLIC1_HUMAN	104.43	0	0	1313.1	968.9	599.02	4	4	1	2	1	4	2	3	Carbamidomethylation	26923	Chloride intracellular channel protein 1 OS=Homo sapiens OX=9606 GN=CLIC1 PE=1 SV=4
1352	1394	P30043|BLVRB_HUMAN				0	0	0	2	2	0	0	0	1	3	1		22119	Flavin reductase (NADPH) OS=Homo sapiens OX=9606 GN=BLVRB PE=1 SV=3
1520	1747	Q9Y6Y9|LY96_HUMAN				1014.5	637.75		2	2	0	0	0	2	1	0	Carbamidomethylation	18546	Lymphocyte antigen 96 OS=Homo sapiens OX=9606 GN=LY96 PE=1 SV=2
893	1187	P35321|SPR1A_HUMAN	1255	974.86	140.17	7197.3	5412.4	4661.9	4	4	2	4	2	5	6	7	Carbamidomethylation	9877	Cornifin-A OS=Homo sapiens OX=9606 GN=SPRR1A PE=1 SV=2
1249	908	Q9NZ72|STMN3_HUMAN				909.79	3499.3	363.32	5	5	0	0	0	2	4	2		21017	Stathmin-3 OS=Homo sapiens OX=9606 GN=STMN3 PE=1 SV=3
1437	1784	P62993|GRB2_HUMAN		234.92	0				2	2	0	3	1	0	0	0	Carbamidomethylation	25206	Growth factor receptor-bound protein 2 OS=Homo sapiens OX=9606 GN=GRB2 PE=1 SV=1
1122	1192	Q9NPF2|CHSTB_HUMAN				1251.3	690.27	634.24	3	3	0	0	0	5	3	5	Carbamidomethylation	41555	Carbohydrate sulfotransferase 11 OS=Homo sapiens OX=9606 GN=CHST11 PE=1 SV=1
1460	1819	P56975|NRG3_HUMAN				894.4	1269	860.9	1	1	0	0	0	1	1	1	Carbamidomethylation	77901	Pro-neuregulin-3 membrane-bound isoform OS=Homo sapiens OX=9606 GN=NRG3 PE=1 SV=1
176	1524	Q9BYE2|TMPSD_HUMAN	0	0					3	1	62	66	58	50	54	44	Carbamidomethylation	63167	Transmembrane protease serine 13 OS=Homo sapiens OX=9606 GN=TMPRSS13 PE=2 SV=5
1329	1641	Q8TDQ0|HAVR2_HUMAN	818.67	0	528.37				2	2	3	1	2	0	0	0	Carbamidomethylation	33394	Hepatitis A virus cellular receptor 2 OS=Homo sapiens OX=9606 GN=HAVCR2 PE=1 SV=3
1174	1389	Q9P0S2|COX16_HUMAN	0			2953.6	963.38	849.87	4	4	1	0	0	3	2	5		12293	Cytochrome c oxidase assembly protein COX16 homolog mitochondrial OS=Homo sapiens OX=9606 GN=COX16 PE=1 SV=1
1016	1481	P35325|SPR2B_HUMAN	399.75	262.32	204.69	3269.4	4721	1755.3	2	2	2	2	4	4	4	3	Carbamidomethylation	7975	Small proline-rich protein 2B OS=Homo sapiens OX=9606 GN=SPRR2B PE=2 SV=1
1016	1482	P22532|SPR2D_HUMAN	399.75	262.32	204.69	3269.4	4721	1755.3	2	2	2	2	4	4	4	3	Carbamidomethylation	7905	Small proline-rich protein 2D OS=Homo sapiens OX=9606 GN=SPRR2D PE=2 SV=2
1016	1483	P22531|SPR2E_HUMAN	399.75	262.32	204.69	3269.4	4721	1755.3	2	2	2	2	4	4	4	3	Carbamidomethylation	7855	Small proline-rich protein 2E OS=Homo sapiens OX=9606 GN=SPRR2E PE=2 SV=2
1016	1708	Q9BYE4|SPR2G_HUMAN	399.75	262.32	204.69	3269.4	4721	1755.3	2	2	2	2	4	4	4	3	Carbamidomethylation	8158	Small proline-rich protein 2G OS=Homo sapiens OX=9606 GN=SPRR2G PE=3 SV=1
1016	1979	P35326|SPR2A_HUMAN	399.75	262.32	204.69	3269.4	4721	1755.3	2	2	2	2	4	4	4	3	Carbamidomethylation	7965	Small proline-rich protein 2A OS=Homo sapiens OX=9606 GN=SPRR2A PE=1 SV=1
1333	1200	Q99941|ATF6B_HUMAN				1521.4	1842.6	1792.3	3	3	0	0	0	1	2	3		76709	Cyclic AMP-dependent transcription factor ATF-6 beta OS=Homo sapiens OX=9606 GN=ATF6B PE=1 SV=2
1370	1607	P36871|PGM1_HUMAN	0	112.81	0		0		2	2	1	2	1	0	1	0		61449	Phosphoglucomutase-1 OS=Homo sapiens OX=9606 GN=PGM1 PE=1 SV=3
1244	1617	Q8NFZ4|NLGN2_HUMAN		0					2	1	2	5	1	0	0	0		90820	Neuroligin-2 OS=Homo sapiens OX=9606 GN=NLGN2 PE=1 SV=1
1092	1532	Q9Y6U3|ADSV_HUMAN				0			3	1	0	0	0	5	5	4	Carbamidomethylation	80489	Adseverin OS=Homo sapiens OX=9606 GN=SCIN PE=1 SV=4
1123	2298	Q92686|NEUG_HUMAN	0			3808.4	5085.5	2386.1	2	2	1	0	0	2	5	5		7618	Neurogranin OS=Homo sapiens OX=9606 GN=NRGN PE=1 SV=1
1279	1499	Q9P0K9|FRS1L_HUMAN	202.88	675.44	122.92				2	2	3	3	1	0	0	0	Carbamidomethylation	37270	DOMON domain-containing protein FRRS1L OS=Homo sapiens OX=9606 GN=FRRS1L PE=1 SV=2
1321	1649	Q9BY76|ANGL4_HUMAN				1576.5	1325.5	914.97	2	2	0	0	0	3	2	1		45214	Angiopoietin-related protein 4 OS=Homo sapiens OX=9606 GN=ANGPTL4 PE=1 SV=2
1535	1360	P30740|ILEU_HUMAN					492.17	235.79	3	3	0	0	0	0	2	1		42742	Leukocyte elastase inhibitor OS=Homo sapiens OX=9606 GN=SERPINB1 PE=1 SV=1
849	1090	P0DOX3|IGD_HUMAN				6649.3	6599.2	376.73	4	3	0	1	0	11	8	10		56224	Immunoglobulin delta heavy chain OS=Homo sapiens OX=9606 PE=1 SV=1
1387	1361	P80188|NGAL_HUMAN					2799	2052.8	3	3	0	0	0	0	4	1	Carbamidomethylation	22588	Neutrophil gelatinase-associated lipocalin OS=Homo sapiens OX=9606 GN=LCN2 PE=1 SV=2
1364	1611	Q96JA1|LRIG1_HUMAN				101.67	604.88	0	2	2	0	0	0	1	3	1	Carbamidomethylation	119113	Leucine-rich repeats and immunoglobulin-like domains protein 1 OS=Homo sapiens OX=9606 GN=LRIG1 PE=1 SV=2
1314	1790	Q5JPE7|NOMO2_HUMAN				3165.8	2629.5	1924	2	2	0	0	0	2	2	2		139439	Nodal modulator 2 OS=Homo sapiens OX=9606 GN=NOMO2 PE=1 SV=1
1314	1791	Q15155|NOMO1_HUMAN				3165.8	2629.5	1924	2	2	0	0	0	2	2	2		134324	Nodal modulator 1 OS=Homo sapiens OX=9606 GN=NOMO1 PE=1 SV=5
1314	1792	P69849|NOMO3_HUMAN				3165.8	2629.5	1924	2	2	0	0	0	2	2	2		134133	Nodal modulator 3 OS=Homo sapiens OX=9606 GN=NOMO3 PE=3 SV=2
916	1955	Q13634|CAD18_HUMAN	347.11	0	123.02	13952	11005	11497	1	1	3	2	2	7	5	5		88073	Cadherin-18 OS=Homo sapiens OX=9606 GN=CDH18 PE=2 SV=1
1017	1712	P63000|RAC1_HUMAN	75.895	517.03	90.115	1513.9	3000.7	1011	2	2	4	2	2	2	4	5	Carbamidomethylation	21450	Ras-related C3 botulinum toxin substrate 1 OS=Homo sapiens OX=9606 GN=RAC1 PE=1 SV=1
1080	1277	P01189|COLI_HUMAN	0	40.157	0	152.64	1315.3		3	3	2	3	4	1	5	0	Carbamidomethylation	29424	Pro-opiomelanocortin OS=Homo sapiens OX=9606 GN=POMC PE=1 SV=2
960	1157	Q04917|1433F_HUMAN				549.04	808.49		4	1	8	4	5	2	2	0	Acetylation (Protein N-term)	28219	14-3-3 protein eta OS=Homo sapiens OX=9606 GN=YWHAH PE=1 SV=4
1363	1671	Q16881|TRXR1_HUMAN				487.55	539.19	537.92	2	2	0	0	0	1	2	2		70906	Thioredoxin reductase 1 cytoplasmic OS=Homo sapiens OX=9606 GN=TXNRD1 PE=1 SV=3
1170	2348	Q9NY56|OBP2A_HUMAN				2337.1	1416.9	1788.1	2	2	0	0	0	3	6	2		19318	Odorant-binding protein 2a OS=Homo sapiens OX=9606 GN=OBP2A PE=1 SV=1
1300	1901	Q9ULZ9|MMP17_HUMAN	870.55	670.65	623.02				1	1	2	3	2	0	0	0		66653	Matrix metalloproteinase-17 OS=Homo sapiens OX=9606 GN=MMP17 PE=1 SV=4
1160	1175	I3L3R5|CCER2_HUMAN	0			1623.9	2138.1	526.36	4	4	1	0	0	2	5	3		30352	Coiled-coil domain-containing glutamate-rich protein 2 OS=Homo sapiens OX=9606 GN=CCER2 PE=2 SV=1
1209	1425	P07197|NFM_HUMAN				256.07	396.08	242.88	3	1	2	1	2	2	1	1		102472	Neurofilament medium polypeptide OS=Homo sapiens OX=9606 GN=NEFM PE=1 SV=3
1325	1239	P35475|IDUA_HUMAN				4582.5	6634.4	537.68	3	3	0	0	0	2	3	1	Carbamidomethylation	72670	Alpha-L-iduronidase OS=Homo sapiens OX=9606 GN=IDUA PE=1 SV=2
1284	1177	P01891|1A68_HUMAN	0						4	1	3	3	1	0	0	0		40909	HLA class I histocompatibility antigen A-68 alpha chain OS=Homo sapiens OX=9606 GN=HLA-A PE=1 SV=4
1284	1178	P10316|1A69_HUMAN	0						4	1	3	3	1	0	0	0		40977	HLA class I histocompatibility antigen A-69 alpha chain OS=Homo sapiens OX=9606 GN=HLA-A PE=1 SV=2
1417	1686	Q76M96|CCD80_HUMAN				533.11	1079.5	525.27	2	2	0	0	0	1	2	1		108174	Coiled-coil domain-containing protein 80 OS=Homo sapiens OX=9606 GN=CCDC80 PE=1 SV=1
1191	1233	Q15198|PGFRL_HUMAN				957.16	1969.9	1497.3	3	3	0	0	0	3	4	3		41861	Platelet-derived growth factor receptor-like protein OS=Homo sapiens OX=9606 GN=PDGFRL PE=1 SV=1
1365	1339	Q8IW45|NNRD_HUMAN				276.52	0	0	3	3	0	0	0	1	3	1	Carbamidomethylation; Oxidation (M); Acetylation (Protein N-term)	36576	ATP-dependent (S)-NAD(P)H-hydrate dehydratase OS=Homo sapiens OX=9606 GN=NAXD PE=1 SV=1
1472	1407	P21579|SYT1_HUMAN				140.8	761.56	485.63	2	2	0	0	0	1	1	1		47573	Synaptotagmin-1 OS=Homo sapiens OX=9606 GN=SYT1 PE=1 SV=1
1177	1170	O15230|LAMA5_HUMAN	0	0	0	906.89	262.22	0	3	3	1	1	4	1	1	2	Carbamidomethylation	399740	Laminin subunit alpha-5 OS=Homo sapiens OX=9606 GN=LAMA5 PE=1 SV=8
1157	1487	O75223|GGCT_HUMAN	143.97	0	0	453.23	298.94	165.12	2	2	2	2	1	1	4	1		21008	Gamma-glutamylcyclotransferase OS=Homo sapiens OX=9606 GN=GGCT PE=1 SV=1
1285	1015	Q9Y6N8|CAD10_HUMAN	90.589	0	0	782.86	734.12	331.39	4	4	2	1	1	1	1	1		88451	Cadherin-10 OS=Homo sapiens OX=9606 GN=CDH10 PE=1 SV=2
1213	1070	Q96CS7|PKHB2_HUMAN				187.8	1022.6	699.77	4	4	0	0	0	4	4	1	Carbamidomethylation	24736	Pleckstrin homology domain-containing family B member 2 OS=Homo sapiens OX=9606 GN=PLEKHB2 PE=1 SV=1
1246	1569	Q99542|MMP19_HUMAN				466.78	0	343.16	2	2	0	0	0	2	3	3		57357	Matrix metalloproteinase-19 OS=Homo sapiens OX=9606 GN=MMP19 PE=1 SV=1
1013	1376	P26447|S10A4_HUMAN	1733.6	1275.9	903.41	5879	1748	5902.7	3	3	5	2	2	3	3	4		11729	Protein S100-A4 OS=Homo sapiens OX=9606 GN=S100A4 PE=1 SV=1
1343	1384	P07311|ACYP1_HUMAN				1752.2	3339.9	943.15	3	3	0	0	0	3	2	1		11261	Acylphosphatase-1 OS=Homo sapiens OX=9606 GN=ACYP1 PE=1 SV=2
1655	1989	Q53RT3|APRV1_HUMAN				0	296.26		2	2	0	0	0	1	1	0		36991	Retroviral-like aspartic protease 1 OS=Homo sapiens OX=9606 GN=ASPRV1 PE=1 SV=1
1113	1603	Q9UGM3|DMBT1_HUMAN	0	0	0	219.03	358.07	0	2	2	2	2	2	4	2	1	Carbamidomethylation	260734	Deleted in malignant brain tumors 1 protein OS=Homo sapiens OX=9606 GN=DMBT1 PE=1 SV=2
1081	1645	Q02487|DSC2_HUMAN	1577.6	1730.8	1084		425.17	284.67	2	2	2	6	5	0	1	1		99962	Desmocollin-2 OS=Homo sapiens OX=9606 GN=DSC2 PE=1 SV=1
1362	1176	P29279|CCN2_HUMAN	0	245.41	0				3	3	1	3	1	0	0	0	Carbamidomethylation	38091	CCN family member 2 OS=Homo sapiens OX=9606 GN=CCN2 PE=1 SV=2
1271	1185	P26885|FKBP2_HUMAN				770.61	3401.8	219.8	3	3	0	0	0	2	4	1		15649	Peptidyl-prolyl cis-trans isomerase FKBP2 OS=Homo sapiens OX=9606 GN=FKBP2 PE=1 SV=2
1382	1776	P41217|OX2G_HUMAN	576.36	751.23	306.84				2	2	1	3	1	0	0	0	Carbamidomethylation	31264	OX-2 membrane glycoprotein OS=Homo sapiens OX=9606 GN=CD200 PE=1 SV=4
1082	1166	A0A087WSX0|LV545_HUMAN				10763	11569	12376	4	4	0	0	0	7	3	5		13162	Immunoglobulin lambda variable 5-45 OS=Homo sapiens OX=9606 GN=IGLV5-45 PE=3 SV=1
1296	1217	P30044|PRDX5_HUMAN	192.12	0	123.92	2024.7	7911.1		3	3	1	1	3	1	1	0	Carbamidomethylation	22086	Peroxiredoxin-5 mitochondrial OS=Homo sapiens OX=9606 GN=PRDX5 PE=1 SV=4
1351	1456	O14522|PTPRT_HUMAN				347.14	169.82	239.57	2	2	0	0	0	1	2	2		162133	Receptor-type tyrosine-protein phosphatase T OS=Homo sapiens OX=9606 GN=PTPRT PE=1 SV=6
1470	2090	P54826|GAS1_HUMAN				83.165	110.82	0	1	1	0	0	0	1	1	1	Carbamidomethylation	35693	Growth arrest-specific protein 1 OS=Homo sapiens OX=9606 GN=GAS1 PE=2 SV=2
1063	1278	O14745|NHRF1_HUMAN	575.59	488.19	294.45	1219	890.93	577.34	3	3	2	5	3	2	2	2		38868	Na(+)/H(+) exchange regulatory cofactor NHE-RF1 OS=Homo sapiens OX=9606 GN=SLC9A3R1 PE=1 SV=4
1478	1279	O00461|GOLI4_HUMAN	0		0				3	3	2	0	1	0	0	0		81880	Golgi integral membrane protein 4 OS=Homo sapiens OX=9606 GN=GOLIM4 PE=1 SV=1
1357	1333	P10721|KIT_HUMAN	123.54	104.22	81.304				3	3	3	1	1	0	0	0	Carbamidomethylation	109864	Mast/stem cell growth factor receptor Kit OS=Homo sapiens OX=9606 GN=KIT PE=1 SV=1
1239	1551	P35247|SFTPD_HUMAN				1900	1906	1874.7	2	2	0	0	0	2	2	4		37728	Pulmonary surfactant-associated protein D OS=Homo sapiens OX=9606 GN=SFTPD PE=1 SV=3
1085	1343	Q15819|UB2V2_HUMAN	493.33	1056.9	496.92	529.56	2514.4	525.57	3	3	1	6	3	1	3	1		16363	Ubiquitin-conjugating enzyme E2 variant 2 OS=Homo sapiens OX=9606 GN=UBE2V2 PE=1 SV=4
1085	1374	Q13404|UB2V1_HUMAN	493.33	1056.9	496.92	529.56	2514.4	525.57	3	3	1	6	3	1	3	1		16495	Ubiquitin-conjugating enzyme E2 variant 1 OS=Homo sapiens OX=9606 GN=UBE2V1 PE=1 SV=2
1206	1600	Q92673|SORL_HUMAN	1271.1	1179.9	839.54				2	2	3	4	2	0	0	0		248425	Sortilin-related receptor OS=Homo sapiens OX=9606 GN=SORL1 PE=1 SV=2
1202	1362	O75144|ICOSL_HUMAN	2679.2	3051.3	2273.3				3	3	3	3	4	0	0	0		33349	ICOS ligand OS=Homo sapiens OX=9606 GN=ICOSLG PE=1 SV=2
1302	1539	Q9BWQ8|LFG2_HUMAN	0	0	0				2	2	2	3	2	0	0	0		35110	Protein lifeguard 2 OS=Homo sapiens OX=9606 GN=FAIM2 PE=1 SV=1
1396	1558	Q9BWP8|COL11_HUMAN				2121.1	545.27	730.4	2	2	0	0	0	1	1	2		28665	Collectin-11 OS=Homo sapiens OX=9606 GN=COLEC11 PE=1 SV=1
1508	1480	O76076|WISP2_HUMAN				0	0		2	2	0	0	0	2	1	0	Carbamidomethylation	26825	WNT1-inducible-signaling pathway protein 2 OS=Homo sapiens OX=9606 GN=WISP2 PE=1 SV=1
1198	1268	P16401|H15_HUMAN	0		176.7				3	2	3	2	3	0	0	2		22580	Histone H1.5 OS=Homo sapiens OX=9606 GN=HIST1H1B PE=1 SV=3
1091	1307	Q9UBG0|MRC2_HUMAN		503.36					3	2	1	3	1	3	3	3	Carbamidomethylation	166674	C-type mannose receptor 2 OS=Homo sapiens OX=9606 GN=MRC2 PE=1 SV=2
1276	1391	Q9NRB3|CHSTC_HUMAN				459.72	649.96	272.5	2	2	0	0	0	1	4	2		48415	Carbohydrate sulfotransferase 12 OS=Homo sapiens OX=9606 GN=CHST12 PE=2 SV=2
1553	1454	O94779|CNTN5_HUMAN			0				2	1	0	0	1	0	0	1	Carbamidomethylation	120686	Contactin-5 OS=Homo sapiens OX=9606 GN=CNTN5 PE=1 SV=2
1482	1547	Q13231|CHIT1_HUMAN	0	297.55					2	2	1	2	0	0	0	0		51681	Chitotriosidase-1 OS=Homo sapiens OX=9606 GN=CHIT1 PE=1 SV=1
1288	1372	O75888|TNF13_HUMAN	979.17	0	1049.3	1486.9	908.25	0	3	3	1	1	1	2	1	1		27433	Tumor necrosis factor ligand superfamily member 13 OS=Homo sapiens OX=9606 GN=TNFSF13 PE=1 SV=1
1340	1476	Q14019|COTL1_HUMAN				1079.4	1032	1062	2	2	0	0	0	2	2	2	Carbamidomethylation	15945	Coactosin-like protein OS=Homo sapiens OX=9606 GN=COTL1 PE=1 SV=3
1656	1992	Q99584|S10AD_HUMAN			0	361.89			2	2	0	0	1	1	0	0		11471	Protein S100-A13 OS=Homo sapiens OX=9606 GN=S100A13 PE=1 SV=1
1404	1464	Q96PD2|DCBD2_HUMAN				630.22	472.26	258.12	2	2	0	0	0	2	1	1	Carbamidomethylation	85035	Discoidin CUB and LCCL domain-containing protein 2 OS=Homo sapiens OX=9606 GN=DCBLD2 PE=1 SV=1
1378	1562	P15692|VEGFA_HUMAN				1980.4	2499.1	1229.7	2	2	0	0	0	2	2	1	Carbamidomethylation	27042	Vascular endothelial growth factor A OS=Homo sapiens OX=9606 GN=VEGFA PE=1 SV=2
908	1211	P04211|LV743_HUMAN				492.57	764.29		4	1	4	2	4	5	5	5		12451	Immunoglobulin lambda variable 7-43 OS=Homo sapiens OX=9606 GN=IGLV7-43 PE=3 SV=2
1428	2450	Q86UW8|HPLN4_HUMAN	306.82	206.39	0				1	1	2	1	1	0	0	0		42801	Hyaluronan and proteoglycan link protein 4 OS=Homo sapiens OX=9606 GN=HAPLN4 PE=2 SV=1
1496	1678	P31937|3HIDH_HUMAN					113.63	402.34	2	2	0	0	0	0	1	2		35329	3-hydroxyisobutyrate dehydrogenase mitochondrial OS=Homo sapiens OX=9606 GN=HIBADH PE=1 SV=2
1168	1720	Q13555|KCC2G_HUMAN					474.42		2	1	1	2	1	3	2	2	Carbamidomethylation	62607	Calcium/calmodulin-dependent protein kinase type II subunit gamma OS=Homo sapiens OX=9606 GN=CAMK2G PE=1 SV=4
1126	3158	Q9UDW1|QCR9_HUMAN	676.32	1099.8	295.93				1	1	5	3	5	0	0	0		7308	Cytochrome b-c1 complex subunit 9 OS=Homo sapiens OX=9606 GN=UQCR10 PE=1 SV=3
1369	1531	P09958|FURIN_HUMAN				5400.6	3466.4	3588.5	2	2	0	0	0	2	1	2		86678	Furin OS=Homo sapiens OX=9606 GN=FURIN PE=1 SV=2
1267	1470	Q06418|TYRO3_HUMAN	726.46	1919.3	426.81				1	1	2	3	2	0	0	0		96905	Tyrosine-protein kinase receptor TYRO3 OS=Homo sapiens OX=9606 GN=TYRO3 PE=1 SV=1
1426	1699	P09467|F16P1_HUMAN				443.14	1002.8		2	2	0	0	0	2	2	0		36842	Fructose-1 6-bisphosphatase 1 OS=Homo sapiens OX=9606 GN=FBP1 PE=1 SV=5
1200	1763	P49411|EFTU_HUMAN				1677.5	3175.8	1457.2	2	2	0	0	0	2	5	3		49542	Elongation factor Tu mitochondrial OS=Homo sapiens OX=9606 GN=TUFM PE=1 SV=2
1224	1408	Q8IV08|PLD3_HUMAN	297.51	586.5	131.01				2	2	3	4	2	0	0	0		54705	Phospholipase D3 OS=Homo sapiens OX=9606 GN=PLD3 PE=1 SV=1
1247	1321	P13693|TCTP_HUMAN				1519.3	1383.2	1058.2	3	3	0	0	0	3	2	3	Carbamidomethylation	19595	Translationally-controlled tumor protein OS=Homo sapiens OX=9606 GN=TPT1 PE=1 SV=1
1422	1335	Q9BUD6|SPON2_HUMAN	0	0			1266.8		3	3	1	1	0	0	2	0		35846	Spondin-2 OS=Homo sapiens OX=9606 GN=SPON2 PE=1 SV=3
891	1218	A0A075B6I9|LV746_HUMAN				2379.5	2626.1	1027.5	4	1	4	2	4	5	5	6		12468	Immunoglobulin lambda variable 7-46 OS=Homo sapiens OX=9606 GN=IGLV7-46 PE=3 SV=4
1162	1249	Q96CG8|CTHR1_HUMAN	0			4591	5619.7	3391	4	3	1	0	0	3	3	4	Carbamidomethylation	26224	Collagen triple helix repeat-containing protein 1 OS=Homo sapiens OX=9606 GN=CTHRC1 PE=1 SV=1
1106	1401	P60953|CDC42_HUMAN	0	174.49	0	367.23	434.21	0	2	2	4	4	2	1	2	1	Carbamidomethylation	21259	Cell division control protein 42 homolog OS=Homo sapiens OX=9606 GN=CDC42 PE=1 SV=2
1349	1399	Q96NY7|CLIC6_HUMAN	0	1153.8	0				2	2	1	3	1	0	0	0	Carbamidomethylation	73012	Chloride intracellular channel protein 6 OS=Homo sapiens OX=9606 GN=CLIC6 PE=2 SV=3
1489	1300	Q96PB7|NOE3_HUMAN				0	510.52		3	3	0	0	0	1	2	0	Carbamidomethylation	54930	Noelin-3 OS=Homo sapiens OX=9606 GN=OLFM3 PE=1 SV=1
1339	1315	P20916|MAG_HUMAN	195.19	596.05	181.17				3	3	1	1	4	0	0	0	Carbamidomethylation	69069	Myelin-associated glycoprotein OS=Homo sapiens OX=9606 GN=MAG PE=1 SV=1
1366	1509	Q15365|PCBP1_HUMAN				424.64	248.94	574.68	2	2	0	0	0	1	3	1	Carbamidomethylation	37498	Poly(rC)-binding protein 1 OS=Homo sapiens OX=9606 GN=PCBP1 PE=1 SV=2
1456	1409	Q9BXP8|PAPP2_HUMAN				261.44		0	2	2	0	0	0	1	0	2	Carbamidomethylation	198537	Pappalysin-2 OS=Homo sapiens OX=9606 GN=PAPPA2 PE=1 SV=4
1252	3234	Q6UWN8|ISK6_HUMAN	0	0			165.43	76.944	1	1	2	2	0	0	1	3	Carbamidomethylation	8585	Serine protease inhibitor Kazal-type 6 OS=Homo sapiens OX=9606 GN=SPINK6 PE=1 SV=1
1654	1980	P50995|ANX11_HUMAN		0					2	2	0	2	0	0	0	0		54390	Annexin A11 OS=Homo sapiens OX=9606 GN=ANXA11 PE=1 SV=1
1232	1446	Q9HCJ2|LRC4C_HUMAN				236.15			2	1	0	0	0	3	2	3		71950	Leucine-rich repeat-containing protein 4C OS=Homo sapiens OX=9606 GN=LRRC4C PE=1 SV=1
1211	1287	Q68BL7|OLM2A_HUMAN	256.16	405.66	308.63	316.02			3	3	2	4	2	1	0	0	Carbamidomethylation	73054	Olfactomedin-like protein 2A OS=Homo sapiens OX=9606 GN=OLFML2A PE=2 SV=1
1324	1561	P02686|MBP_HUMAN	0			2160	2185.2	1476.6	2	2	2	0	0	1	1	2		33117	Myelin basic protein OS=Homo sapiens OX=9606 GN=MBP PE=1 SV=3
1238	1516	O75347|TBCA_HUMAN				252.43	371.84	24550	2	2	0	0	0	2	2	4		12855	Tubulin-specific chaperone A OS=Homo sapiens OX=9606 GN=TBCA PE=1 SV=3
1315	1220	Q2UY09|COSA1_HUMAN				891.18	551.26	106.05	3	3	0	0	0	2	2	2		116657	Collagen alpha-1(XXVIII) chain OS=Homo sapiens OX=9606 GN=COL28A1 PE=2 SV=2
1327	1709	Q6UXI9|NPNT_HUMAN				2370.6	1972	0	2	2	0	0	0	3	2	1	Carbamidomethylation	61907	Nephronectin OS=Homo sapiens OX=9606 GN=NPNT PE=2 SV=3
1275	1478	Q9UI15|TAGL3_HUMAN				164.13	302.09		2	1	1	1	1	1	2	1	Carbamidomethylation	22473	Transgelin-3 OS=Homo sapiens OX=9606 GN=TAGLN3 PE=1 SV=2
1330	1648	Q9H0E2|TOLIP_HUMAN				157.27	0	165.35	2	2	0	0	0	4	1	1	Carbamidomethylation	30282	Toll-interacting protein OS=Homo sapiens OX=9606 GN=TOLLIP PE=1 SV=1
1255	1993	P02810|PRPC_HUMAN				2020	2217.1	395.4	3	3	0	0	0	4	3	1		17016	Salivary acidic proline-rich phosphoprotein 1/2 OS=Homo sapiens OX=9606 GN=PRH1 PE=1 SV=2
1263	1459	P20366|TKN1_HUMAN	127.16	1728.8	227.97		261.71	0	2	2	1	3	2	0	1	1		15003	Protachykinin-1 OS=Homo sapiens OX=9606 GN=TAC1 PE=1 SV=1
1583	1988	Q7L0X0|TRIL_HUMAN				0	0		1	1	0	0	0	1	1	0		88723	TLR4 interactor with leucine rich repeats OS=Homo sapiens OX=9606 GN=TRIL PE=1 SV=2
1196	1322	Q9Y5Y7|LYVE1_HUMAN		122.54	0	1064.9	376.22		3	3	0	1	2	5	2	0		35213	Lymphatic vessel endothelial hyaluronic acid receptor 1 OS=Homo sapiens OX=9606 GN=LYVE1 PE=1 SV=2
874	1396	P02771|FETA_HUMAN	37044	36047	24978	1183.5	0		4	3	8	8	8	2	1	0	Carbamidomethylation; Acetylation (Protein N-term)	68678	Alpha-fetoprotein OS=Homo sapiens OX=9606 GN=AFP PE=1 SV=1
1169	1373	P60903|S10AA_HUMAN	3824.9	0	0	682.21	895.27		3	3	3	2	1	2	3	0	Carbamidomethylation	11203	Protein S100-A10 OS=Homo sapiens OX=9606 GN=S100A10 PE=1 SV=2
1409	1437	P20472|PRVA_HUMAN			233.42				2	2	0	0	4	0	0	0		12059	Parvalbumin alpha OS=Homo sapiens OX=9606 GN=PVALB PE=1 SV=2
1184	1227	O15041|SEM3E_HUMAN				1685.6	1937.1	531.91	3	3	0	0	0	5	2	3	Carbamidomethylation	89228	Semaphorin-3E OS=Homo sapiens OX=9606 GN=SEMA3E PE=1 SV=1
1602	1622	P01833|PIGR_HUMAN				109.82			2	2	0	0	0	2	0	0	Carbamidomethylation	83284	Polymeric immunoglobulin receptor OS=Homo sapiens OX=9606 GN=PIGR PE=1 SV=4
1450	1629	P25940|CO5A3_HUMAN				753.85	545.01	293.58	1	1	0	0	0	1	1	1		172120	Collagen alpha-3(V) chain OS=Homo sapiens OX=9606 GN=COL5A3 PE=1 SV=3
1512	1998	Q16663|CCL15_HUMAN				0	494.81		2	2	0	0	0	1	2	0	Carbamidomethylation	12248	C-C motif chemokine 15 OS=Homo sapiens OX=9606 GN=CCL15 PE=1 SV=2
1379	1661	Q86UN2|R4RL1_HUMAN				363.38	300.52	0	2	2	0	0	0	1	3	1		49065	Reticulon-4 receptor-like 1 OS=Homo sapiens OX=9606 GN=RTN4RL1 PE=1 SV=1
1590	1638	Q6UXI7|VITRN_HUMAN				0	452.39		2	2	0	0	0	1	1	0		73930	Vitrin OS=Homo sapiens OX=9606 GN=VIT PE=2 SV=1
1406	2209	Q96TC7|RMD3_HUMAN	0	0	0				1	1	2	1	1	0	0	0		52118	Regulator of microtubule dynamics protein 3 OS=Homo sapiens OX=9606 GN=RMDN3 PE=1 SV=2
1425	1377	P12724|ECP_HUMAN				253.53	136.04		3	3	0	0	0	2	2	0	Carbamidomethylation	18385	Eosinophil cationic protein OS=Homo sapiens OX=9606 GN=RNASE3 PE=1 SV=2
1261	3197	P08949|NMB_HUMAN	0	0	0	243.65	225.46	0	1	1	1	1	2	2	1	1		13252	Neuromedin-B OS=Homo sapiens OX=9606 GN=NMB PE=1 SV=4
1626	2005	P30990|NEUT_HUMAN	0	0					1	1	1	1	0	0	0	0		19795	Neurotensin/neuromedin N OS=Homo sapiens OX=9606 GN=NTS PE=1 SV=2
1317	1479	Q9Y6C2|EMIL1_HUMAN	3418.1	3248.3	3864.9	856.35	437.64		1	1	1	1	2	1	1	0		106695	EMILIN-1 OS=Homo sapiens OX=9606 GN=EMILIN1 PE=1 SV=3
1521	1811	Q9UHL4|DPP2_HUMAN	0	82.53					1	1	1	2	0	0	0	0	Carbamidomethylation	54342	Dipeptidyl peptidase 2 OS=Homo sapiens OX=9606 GN=DPP7 PE=1 SV=3
1253	1386	P54803|GALC_HUMAN		562.02	195.69				3	3	0	5	3	0	0	0		77063	Galactocerebrosidase OS=Homo sapiens OX=9606 GN=GALC PE=1 SV=3
1359	1363	P25705|ATPA_HUMAN				1207.2	978.88	859.6	2	2	0	0	0	2	2	1		59751	ATP synthase subunit alpha mitochondrial OS=Homo sapiens OX=9606 GN=ATP5F1A PE=1 SV=1
1047	1541	Q9NPY3|C1QR1_HUMAN					0		2	1	3	3	4	1	2	4	Carbamidomethylation	68560	Complement component C1q receptor OS=Homo sapiens OX=9606 GN=CD93 PE=1 SV=3
1286	1771	O95782|AP2A1_HUMAN				419.26	263.67	250.08	1	1	0	0	0	3	2	2		107546	AP-2 complex subunit alpha-1 OS=Homo sapiens OX=9606 GN=AP2A1 PE=1 SV=3
1182	1280	P42857|NSG1_HUMAN			385	887.85	2021.4	1325.5	3	3	0	0	1	1	6	2		20913	Neuronal vesicle trafficking-associated protein 1 OS=Homo sapiens OX=9606 GN=NSG1 PE=1 SV=1
1332	2317	Q9UKZ9|PCOC2_HUMAN				358.95	517.29	148.68	1	1	0	0	0	3	2	1	Carbamidomethylation	45717	Procollagen C-endopeptidase enhancer 2 OS=Homo sapiens OX=9606 GN=PCOLCE2 PE=1 SV=1
1335	1692	Q9UI42|CBPA4_HUMAN				737.93	626.38	474.79	2	2	0	0	0	1	3	2	Carbamidomethylation	47351	Carboxypeptidase A4 OS=Homo sapiens OX=9606 GN=CPA4 PE=1 SV=2
1338	2244	Q01629|IFM2_HUMAN	137.96	329.74	66.941		363.42	142.65	1	1	1	1	1	0	2	1		14632	Interferon-induced transmembrane protein 2 OS=Homo sapiens OX=9606 GN=IFITM2 PE=1 SV=2
1338	2252	P13164|IFM1_HUMAN	137.96	329.74	66.941		363.42	142.65	1	1	1	1	1	0	2	1		13964	Interferon-induced transmembrane protein 1 OS=Homo sapiens OX=9606 GN=IFITM1 PE=1 SV=3
1338	2263	Q01628|IFM3_HUMAN	137.96	329.74	66.941		363.42	142.65	1	1	1	1	1	0	2	1		14632	Interferon-induced transmembrane protein 3 OS=Homo sapiens OX=9606 GN=IFITM3 PE=1 SV=2
1388	1981	P62942|FKB1A_HUMAN	781.09	954.2	451.84				2	2	2	2	1	0	0	0	Carbamidomethylation	11951	Peptidyl-prolyl cis-trans isomerase FKBP1A OS=Homo sapiens OX=9606 GN=FKBP1A PE=1 SV=2
1492	1475	Q04756|HGFA_HUMAN	0	0					2	2	2	1	0	0	0	0	Carbamidomethylation	70682	Hepatocyte growth factor activator OS=Homo sapiens OX=9606 GN=HGFAC PE=1 SV=1
1328	1313	P13473|LAMP2_HUMAN	206.36	695.99					3	3	1	5	0	0	0	0	Carbamidomethylation	44961	Lysosome-associated membrane glycoprotein 2 OS=Homo sapiens OX=9606 GN=LAMP2 PE=1 SV=2
1259	2483	O15467|CCL16_HUMAN				0	0	0	1	1	0	0	0	3	1	4	Carbamidomethylation	13600	C-C motif chemokine 16 OS=Homo sapiens OX=9606 GN=CCL16 PE=1 SV=1
1476	2101	Q8NC51|PAIRB_HUMAN				0	0		1	1	0	0	0	2	1	0		44965	Plasminogen activator inhibitor 1 RNA-binding protein OS=Homo sapiens OX=9606 GN=SERBP1 PE=1 SV=2
1423	2197	Q658N2|WSCD1_HUMAN	795.18	1415.3	521.26				1	1	2	1	1	0	0	0		65694	WSC domain-containing protein 1 OS=Homo sapiens OX=9606 GN=WSCD1 PE=2 SV=1
1418	1710	O15145|ARPC3_HUMAN				469.22	605.97	213.34	2	2	0	0	0	2	1	1		20547	Actin-related protein 2/3 complex subunit 3 OS=Homo sapiens OX=9606 GN=ARPC3 PE=1 SV=3
1493	1826	O00230|CORT_HUMAN	177.6	0	0				1	1	1	1	1	0	0	0		11532	Cortistatin OS=Homo sapiens OX=9606 GN=CORT PE=2 SV=1
1265	1990	Q9NY72|SCN3B_HUMAN	564.18	877.94	437.95				2	2	3	3	2	0	0	0	Carbamidomethylation	24702	Sodium channel subunit beta-3 OS=Homo sapiens OX=9606 GN=SCN3B PE=1 SV=1
1525	3097	Q14CZ8|HECAM_HUMAN					0		1	1	0	0	0	0	3	0		46027	Hepatocyte cell adhesion molecule OS=Homo sapiens OX=9606 GN=HEPACAM PE=1 SV=1
1176	3242	Q9H0Q3|FXYD6_HUMAN	4075	4607.3	2611.9				1	1	3	3	5	0	0	0		10542	FXYD domain-containing ion transport regulator 6 OS=Homo sapiens OX=9606 GN=FXYD6 PE=1 SV=1
1547	1795	Q9UBS3|DNJB9_HUMAN			0	0			1	1	0	0	1	1	0	0		25518	DnaJ homolog subfamily B member 9 OS=Homo sapiens OX=9606 GN=DNAJB9 PE=1 SV=1
973	1681	Q8IYJ0|PIANP_HUMAN	1211.8	0	1217.8	66852	75280	59122	2	2	1	1	1	6	7	5	Carbamidomethylation	30076	PILR alpha-associated neural protein OS=Homo sapiens OX=9606 GN=PIANP PE=2 SV=1
1631	1427	Q06323|PSME1_HUMAN				235.7	93.462		2	2	0	0	0	1	1	0		28723	Proteasome activator complex subunit 1 OS=Homo sapiens OX=9606 GN=PSME1 PE=1 SV=1
1529	3098	P22792|CPN2_HUMAN	0	0	0				1	1	1	1	1	0	0	0		60557	Carboxypeptidase N subunit 2 OS=Homo sapiens OX=9606 GN=CPN2 PE=1 SV=3
1627	2305	Q15942|ZYX_HUMAN				334.84	0		1	1	0	0	0	1	1	0		61277	Zyxin OS=Homo sapiens OX=9606 GN=ZYX PE=1 SV=1
1942	1781	P07237|PDIA1_HUMAN	0						1	1	1	0	0	0	0	0		57116	Protein disulfide-isomerase OS=Homo sapiens OX=9606 GN=P4HB PE=1 SV=3
1937	2438	Q8N6Y2|LRC17_HUMAN				502.87			1	1	0	0	0	1	0	0		51800	Leucine-rich repeat-containing protein 17 OS=Homo sapiens OX=9606 GN=LRRC17 PE=2 SV=1
1440	2312	P02689|MYP2_HUMAN	353.64	432.35	135.6				1	1	1	2	1	0	0	0		14909	Myelin P2 protein OS=Homo sapiens OX=9606 GN=PMP2 PE=1 SV=3
1440	3171	P15090|FABP4_HUMAN	353.64	432.35	135.6				1	1	1	2	1	0	0	0		14719	Fatty acid-binding protein adipocyte OS=Homo sapiens OX=9606 GN=FABP4 PE=1 SV=3
1974	2720	Q9HB71|CYBP_HUMAN				369.57			1	1	0	0	0	1	0	0		26210	Calcyclin-binding protein OS=Homo sapiens OX=9606 GN=CACYBP PE=1 SV=2
1466	1694	O60486|PLXC1_HUMAN				145.09		624.66	2	2	0	0	0	1	0	2	Carbamidomethylation	175741	Plexin-C1 OS=Homo sapiens OX=9606 GN=PLXNC1 PE=1 SV=1
1304	1995	Q8NHG7|SVIP_HUMAN				2480.3	2564.5	2055.8	2	2	0	0	0	2	3	2		8443	Small VCP/p97-interacting protein OS=Homo sapiens OX=9606 GN=SVIP PE=1 SV=1
1610	2095	Q6NUJ1|SAPL1_HUMAN				2621.2	2612.5		1	1	0	0	0	1	1	0	Carbamidomethylation	56627	Proactivator polypeptide-like 1 OS=Homo sapiens OX=9606 GN=PSAPL1 PE=2 SV=2
1986	3100	P50454|SERPH_HUMAN	0						1	1	1	0	0	0	0	0		46441	Serpin H1 OS=Homo sapiens OX=9606 GN=SERPINH1 PE=1 SV=2
1415	1549	Q13296|SG2A2_HUMAN				1173.5	800.64	699.73	2	2	0	0	0	2	1	1	Carbamidomethylation	10499	Mammaglobin-A OS=Homo sapiens OX=9606 GN=SCGB2A2 PE=1 SV=1
1345	1417	Q9BWV1|BOC_HUMAN	260.41	275.45	191.07		0		2	2	1	1	1	0	2	0		121059	Brother of CDO OS=Homo sapiens OX=9606 GN=BOC PE=1 SV=1
1150	2490	O60507|TPST1_HUMAN	280.15	282.83	181.19	0	571.61	253.28	1	1	3	4	2	1	1	1		42188	Protein-tyrosine sulfotransferase 1 OS=Homo sapiens OX=9606 GN=TPST1 PE=1 SV=1
1486	1633	P25445|TNR6_HUMAN				5372.3	233.16		2	2	0	0	0	2	1	0	Carbamidomethylation	37732	Tumor necrosis factor receptor superfamily member 6 OS=Homo sapiens OX=9606 GN=FAS PE=1 SV=1
1386	2721	P01282|VIP_HUMAN	1165.7	1292.3	904.22				1	1	1	3	1	0	0	0		19169	VIP peptides OS=Homo sapiens OX=9606 GN=VIP PE=1 SV=1
1412	2187	P11215|ITAM_HUMAN				0	0	0	1	1	0	0	0	1	1	2		127178	Integrin alpha-M OS=Homo sapiens OX=9606 GN=ITGAM PE=1 SV=2
1634	1410	Q9BT09|CNPY3_HUMAN				0		295.48	2	2	0	0	0	1	0	1		30748	Protein canopy homolog 3 OS=Homo sapiens OX=9606 GN=CNPY3 PE=1 SV=1
1377	1347	Q96CX2|KCD12_HUMAN				1115	1247.3	694.52	3	3	0	0	0	2	2	1		35701	BTB/POZ domain-containing protein KCTD12 OS=Homo sapiens OX=9606 GN=KCTD12 PE=1 SV=1
1341	2002	P02808|STAT_HUMAN	455.23			659.86	614.39	197.74	3	3	2	0	0	1	2	1		7304	Statherin OS=Homo sapiens OX=9606 GN=STATH PE=1 SV=2
1216	3452	A0A0A0MT89|KJ01_HUMAN				18413	9178.7	6642.4	2	2	0	0	0	3	3	3		1394	Immunoglobulin kappa joining 1 OS=Homo sapiens OX=9606 GN=IGKJ1 PE=4 SV=2
1222	1731	O43291|SPIT2_HUMAN	66.463	437.74	132.34				2	2	4	3	2	0	0	0	Carbamidomethylation	28228	Kunitz-type protease inhibitor 2 OS=Homo sapiens OX=9606 GN=SPINT2 PE=1 SV=2
1306	2919	Q6UWS5|PT117_HUMAN	0	194	0	1215.2	1176	723.16	1	1	1	1	1	1	1	2		9223	Protein PET117 homolog mitochondrial OS=Homo sapiens OX=9606 GN=PET117 PE=3 SV=1
1649	1749	Q96FQ6|S10AG_HUMAN	0				369.07		2	2	1	0	0	0	1	0		11801	Protein S100-A16 OS=Homo sapiens OX=9606 GN=S100A16 PE=1 SV=1
1555	1442	Q76KP1|B4GN4_HUMAN				0	0		2	2	0	0	0	1	1	0	Carbamidomethylation	116513	N-acetyl-beta-glucosaminyl-glycoprotein 4-beta-N-acetylgalactosaminyltransferase 1 OS=Homo sapiens OX=9606 GN=B4GALNT4 PE=1 SV=1
1619	1746	O00499|BIN1_HUMAN					323.15		1	1	0	0	0	0	2	0		64699	Myc box-dependent-interacting protein 1 OS=Homo sapiens OX=9606 GN=BIN1 PE=1 SV=1
1402	1900	Q9HBJ8|CLTRN_HUMAN	318.8	0	312.17				1	1	1	1	2	0	0	0		25235	Collectrin OS=Homo sapiens OX=9606 GN=CLTRN PE=1 SV=1
1334	1469	P53041|PPP5_HUMAN				134.17	146.75		2	2	0	0	0	4	2	0	Carbamidomethylation	56879	Serine/threonine-protein phosphatase 5 OS=Homo sapiens OX=9606 GN=PPP5C PE=1 SV=1
1227	2793	P18509|PACA_HUMAN	0	320.73	0				1	1	2	3	4	0	0	0		18835	Pituitary adenylate cyclase-activating polypeptide OS=Homo sapiens OX=9606 GN=ADCYAP1 PE=1 SV=3
1258	1370	P35754|GLRX1_HUMAN	196.66		581.59			118.86	3	3	3	0	4	0	0	1	Carbamidomethylation; Acetylation (Protein N-term)	11776	Glutaredoxin-1 OS=Homo sapiens OX=9606 GN=GLRX PE=1 SV=2
1439	2167	P09529|INHBB_HUMAN				517.48	1016.7	275.49	1	1	0	0	0	2	1	1		45122	Inhibin beta B chain OS=Homo sapiens OX=9606 GN=INHBB PE=1 SV=2
1850	1467	P01133|EGF_HUMAN	0						1	1	1	0	0	0	0	0		133994	Pro-epidermal growth factor OS=Homo sapiens OX=9606 GN=EGF PE=1 SV=2
1509	1723	Q11201|SIA4A_HUMAN		0			852.27		2	2	0	2	0	0	1	0		39075	CMP-N-acetylneuraminate-beta-galactosamide-alpha-2 3-sialyltransferase 1 OS=Homo sapiens OX=9606 GN=ST3GAL1 PE=2 SV=1
1310	2142	Q9H336|CRLD1_HUMAN	990.58	762.98	1508.9				1	1	2	2	2	0	0	0	Oxidation (M)	56888	Cysteine-rich secretory protein LCCL domain-containing 1 OS=Homo sapiens OX=9606 GN=CRISPLD1 PE=2 SV=1
1513	2432	P62140|PP1B_HUMAN				216.23	273.91	146.62	1	1	0	0	0	1	1	1		37187	Serine/threonine-protein phosphatase PP1-beta catalytic subunit OS=Homo sapiens OX=9606 GN=PPP1CB PE=1 SV=3
1513	2459	P62136|PP1A_HUMAN				216.23	273.91	146.62	1	1	0	0	0	1	1	1		37512	Serine/threonine-protein phosphatase PP1-alpha catalytic subunit OS=Homo sapiens OX=9606 GN=PPP1CA PE=1 SV=1
1513	2744	P36873|PP1G_HUMAN				216.23	273.91	146.62	1	1	0	0	0	1	1	1		36984	Serine/threonine-protein phosphatase PP1-gamma catalytic subunit OS=Homo sapiens OX=9606 GN=PPP1CC PE=1 SV=1
1657	1999	P24387|CRHBP_HUMAN		0					2	2	0	2	0	0	0	0	Carbamidomethylation	36144	Corticotropin-releasing factor-binding protein OS=Homo sapiens OX=9606 GN=CRHBP PE=1 SV=2
1777	1718	P10745|RET3_HUMAN	97.128						1	1	1	0	0	0	0	0		135362	Retinol-binding protein 3 OS=Homo sapiens OX=9606 GN=RBP3 PE=1 SV=2
1522	1813	O15466|SIA8E_HUMAN					590.88	581.05	2	2	0	0	0	0	1	2		43895	Alpha-2 8-sialyltransferase 8E OS=Homo sapiens OX=9606 GN=ST8SIA5 PE=1 SV=2
912	1570	Q96N67|DOCK7_HUMAN	77827	14304	10231	70080	76370	10761	3	3	3	4	3	5	5	4	Carbamidomethylation	242558	Dedicator of cytokinesis protein 7 OS=Homo sapiens OX=9606 GN=DOCK7 PE=1 SV=4
1383	3078	Q6EEV6|SUMO4_HUMAN				1423.9	1308.8	1736.5	1	1	0	0	0	2	2	1		10685	Small ubiquitin-related modifier 4 OS=Homo sapiens OX=9606 GN=SUMO4 PE=1 SV=2
1383	3434	P61956|SUMO2_HUMAN				1423.9	1308.8	1736.5	1	1	0	0	0	2	2	1		10871	Small ubiquitin-related modifier 2 OS=Homo sapiens OX=9606 GN=SUMO2 PE=1 SV=3
1383	3435	P55854|SUMO3_HUMAN				1423.9	1308.8	1736.5	1	1	0	0	0	2	2	1		11637	Small ubiquitin-related modifier 3 OS=Homo sapiens OX=9606 GN=SUMO3 PE=1 SV=2
1248	2066	A0A075B6I4|LVX54_HUMAN				1487	1332.2	8273.4	2	2	0	0	0	3	2	3		12395	Immunoglobulin lambda variable 10-54 OS=Homo sapiens OX=9606 GN=IGLV10-54 PE=3 SV=1
1435	3032	Q9H2A9|CHST8_HUMAN				1917.1	1975.6	1339.9	1	1	0	0	0	1	1	2		48834	Carbohydrate sulfotransferase 8 OS=Homo sapiens OX=9606 GN=CHST8 PE=1 SV=2
1431	2027	P63313|TYB10_HUMAN	497.6	456.56	0				2	2	1	2	1	0	0	0	Acetylation (Protein N-term)	5026	Thymosin beta-10 OS=Homo sapiens OX=9606 GN=TMSB10 PE=1 SV=2
1961	2236	Q9Y2Q3|GSTK1_HUMAN					0		1	1	0	0	0	0	1	0		25497	Glutathione S-transferase kappa 1 OS=Homo sapiens OX=9606 GN=GSTK1 PE=1 SV=3
1344	3436	O00168|PLM_HUMAN	379.49	0	353.69				1	1	3	2	1	0	0	0		10441	Phospholemman OS=Homo sapiens OX=9606 GN=FXYD1 PE=1 SV=2
1550	1534	P04275|VWF_HUMAN	0	0					2	2	1	1	0	0	0	0	Carbamidomethylation	309262	von Willebrand factor OS=Homo sapiens OX=9606 GN=VWF PE=1 SV=4
1510	1727	O60909|B4GT2_HUMAN		210.11	159.75			245.5	2	2	0	1	1	0	0	1		41972	Beta-1 4-galactosyltransferase 2 OS=Homo sapiens OX=9606 GN=B4GALT2 PE=1 SV=1
1421	1254	O95841|ANGL1_HUMAN	130.47	210.23			539.61		3	2	1	1	0	1	1	0	Carbamidomethylation	56720	Angiopoietin-related protein 1 OS=Homo sapiens OX=9606 GN=ANGPTL1 PE=2 SV=1
1594	1423	P53634|CATC_HUMAN		412.48					2	2	0	2	0	0	0	0		51854	Dipeptidyl peptidase 1 OS=Homo sapiens OX=9606 GN=CTSC PE=1 SV=2
1405	1912	P24588|AKAP5_HUMAN				661.72	587.68	152.96	1	1	0	0	0	2	1	1		47088	A-kinase anchor protein 5 OS=Homo sapiens OX=9606 GN=AKAP5 PE=1 SV=3
1990	3248	O95433|AHSA1_HUMAN						0	1	1	0	0	0	0	0	1		38274	Activator of 90 kDa heat shock protein ATPase homolog 1 OS=Homo sapiens OX=9606 GN=AHSA1 PE=1 SV=1
1299	1586	Q99536|VAT1_HUMAN	0	0	0	374.68		259.83	2	2	2	1	2	1	0	1		41920	Synaptic vesicle membrane protein VAT-1 homolog OS=Homo sapiens OX=9606 GN=VAT1 PE=1 SV=2
1532	3437	A6NKN8|PC4L1_HUMAN				424.39	435.26	0	1	1	0	0	0	1	1	1		7476	Purkinje cell protein 4-like protein 1 OS=Homo sapiens OX=9606 GN=PCP4L1 PE=3 SV=3
1531	3240	Q86TE4|LUZP2_HUMAN				536.14	257.65	321.44	1	1	0	0	0	1	1	1	Carbamidomethylation	38958	Leucine zipper protein 2 OS=Homo sapiens OX=9606 GN=LUZP2 PE=2 SV=2
1603	1682	Q504Y2|PKDCC_HUMAN				258.84		199.06	1	1	0	0	0	1	0	1	Carbamidomethylation	54132	Extracellular tyrosine-protein kinase PKDCC OS=Homo sapiens OX=9606 GN=PKDCC PE=2 SV=2
1997	3438	P25398|RS12_HUMAN					101.97		1	1	0	0	0	0	1	0	Acetylation (Protein N-term)	14515	40S ribosomal protein S12 OS=Homo sapiens OX=9606 GN=RPS12 PE=1 SV=3
1461	1744	Q9UQP3|TENN_HUMAN				167.81	0		1	1	0	0	0	2	1	0		144034	Tenascin-N OS=Homo sapiens OX=9606 GN=TNN PE=1 SV=2
1618	1632	Q14240|IF4A2_HUMAN				318.37		0	2	2	0	0	0	1	0	1		46402	Eukaryotic initiation factor 4A-II OS=Homo sapiens OX=9606 GN=EIF4A2 PE=1 SV=2
1618	1677	P60842|IF4A1_HUMAN				318.37		0	2	2	0	0	0	1	0	1		46154	Eukaryotic initiation factor 4A-I OS=Homo sapiens OX=9606 GN=EIF4A1 PE=1 SV=1
1643	2607	O15144|ARPC2_HUMAN				419.01		308.19	1	1	0	0	0	1	0	1		34333	Actin-related protein 2/3 complex subunit 2 OS=Homo sapiens OX=9606 GN=ARPC2 PE=1 SV=1
1264	3440	P13500|CCL2_HUMAN				2118.9	2507	1873.4	1	1	0	0	0	3	2	3		11025	C-C motif chemokine 2 OS=Homo sapiens OX=9606 GN=CCL2 PE=1 SV=1
1984	3084	P12644|BMP4_HUMAN				274.85			1	1	0	0	0	1	0	0	Carbamidomethylation	46555	Bone morphogenetic protein 4 OS=Homo sapiens OX=9606 GN=BMP4 PE=1 SV=1
1488	1583	Q99988|GDF15_HUMAN			68.191		1493.5		2	2	0	0	1	0	2	0		34140	Growth/differentiation factor 15 OS=Homo sapiens OX=9606 GN=GDF15 PE=1 SV=3
1499	2137	P13726|TF_HUMAN	0	305.71					1	1	2	1	0	0	0	0		33068	Tissue factor OS=Homo sapiens OX=9606 GN=F3 PE=1 SV=1
1621	2192	Q86TY3|ARMD4_HUMAN		0	0				1	1	0	1	1	0	0	0		84173	Armadillo-like helical domain-containing protein 4 OS=Homo sapiens OX=9606 GN=ARMH4 PE=1 SV=1
1375	2498	Q9H4G4|GAPR1_HUMAN	0			427.5	582.07		1	1	1	0	0	2	2	0		17218	Golgi-associated plant pathogenesis-related protein 1 OS=Homo sapiens OX=9606 GN=GLIPR2 PE=1 SV=3
1890	2206	P10636|TAU_HUMAN					0		1	1	0	0	0	0	1	0		78928	Microtubule-associated protein tau OS=Homo sapiens OX=9606 GN=MAPT PE=1 SV=5
1326	1512	Q15465|SHH_HUMAN				1566.8	481.62	855.45	2	2	0	0	0	2	2	2		49607	Sonic hedgehog protein OS=Homo sapiens OX=9606 GN=SHH PE=1 SV=1
1326	1514	Q14623|IHH_HUMAN				1566.8	481.62	855.45	2	2	0	0	0	2	2	2		45251	Indian hedgehog protein OS=Homo sapiens OX=9606 GN=IHH PE=1 SV=4
1893	2235	Q6ZMM2|ATL5_HUMAN						35.991	1	1	0	0	0	0	0	1	Carbamidomethylation	53194	ADAMTS-like protein 5 OS=Homo sapiens OX=9606 GN=ADAMTSL5 PE=1 SV=3
1530	3143	Q9Y5X9|LIPE_HUMAN		0			173.79	212.32	1	1	0	1	0	0	1	1	Carbamidomethylation	56795	Endothelial lipase OS=Homo sapiens OX=9606 GN=LIPG PE=1 SV=1
1226	1938	P28161|GSTM2_HUMAN	0	94.092	0	224.45	0	156.49	1	1	2	2	2	1	1	1		25745	Glutathione S-transferase Mu 2 OS=Homo sapiens OX=9606 GN=GSTM2 PE=1 SV=2
1494	2172	Q9GZM7|TINAL_HUMAN		0					1	1	0	3	0	0	0	0	Carbamidomethylation	52387	Tubulointerstitial nephritis antigen-like OS=Homo sapiens OX=9606 GN=TINAGL1 PE=1 SV=1
1888	2128	Q5VUB5|F1711_HUMAN		0					1	1	0	1	0	0	0	0		97854	Protein FAM171A1 OS=Homo sapiens OX=9606 GN=FAM171A1 PE=1 SV=1
1500	1788	P11279|LAMP1_HUMAN	281.86	306.95					2	2	2	1	0	0	0	0	Carbamidomethylation	44882	Lysosome-associated membrane glycoprotein 1 OS=Homo sapiens OX=9606 GN=LAMP1 PE=1 SV=3
1438	1825	Q8NBZ7|UXS1_HUMAN	0	0	113.2				2	2	1	1	2	0	0	0		47577	UDP-glucuronic acid decarboxylase 1 OS=Homo sapiens OX=9606 GN=UXS1 PE=1 SV=1
1490	1732	Q14210|LY6D_HUMAN	0				0		2	2	1	0	0	0	2	0	Carbamidomethylation; Acetylation (Protein N-term)	13286	Lymphocyte antigen 6D OS=Homo sapiens OX=9606 GN=LY6D PE=1 SV=1
1183	1820	P62820|RAB1A_HUMAN	1469.7	1846.3	1199.6	0	1380.2	420.79	1	1	3	2	2	1	1	1		22678	Ras-related protein Rab-1A OS=Homo sapiens OX=9606 GN=RAB1A PE=1 SV=3
1183	2049	Q5JT25|RAB41_HUMAN	1469.7	1846.3	1199.6	0	1380.2	420.79	1	1	3	2	2	1	1	1		25038	Ras-related protein Rab-41 OS=Homo sapiens OX=9606 GN=RAB41 PE=1 SV=2
1183	2102	O95716|RAB3D_HUMAN	1469.7	1846.3	1199.6	0	1380.2	420.79	1	1	3	2	2	1	1	1		24267	Ras-related protein Rab-3D OS=Homo sapiens OX=9606 GN=RAB3D PE=1 SV=1
1183	2104	P61018|RAB4B_HUMAN	1469.7	1846.3	1199.6	0	1380.2	420.79	1	1	3	2	2	1	1	1		23587	Ras-related protein Rab-4B OS=Homo sapiens OX=9606 GN=RAB4B PE=1 SV=1
1183	2121	Q7Z6P3|RAB44_HUMAN	1469.7	1846.3	1199.6	0	1380.2	420.79	1	1	3	2	2	1	1	1		110850	Ras-related protein Rab-44 OS=Homo sapiens OX=9606 GN=RAB44 PE=1 SV=4
1183	2150	Q8IZ41|RASEF_HUMAN	1469.7	1846.3	1199.6	0	1380.2	420.79	1	1	3	2	2	1	1	1		82879	Ras and EF-hand domain-containing protein OS=Homo sapiens OX=9606 GN=RASEF PE=1 SV=1
1183	2240	P51159|RB27A_HUMAN	1469.7	1846.3	1199.6	0	1380.2	420.79	1	1	3	2	2	1	1	1		24868	Ras-related protein Rab-27A OS=Homo sapiens OX=9606 GN=RAB27A PE=1 SV=3
1183	2315	Q92928|RAB1C_HUMAN	1469.7	1846.3	1199.6	0	1380.2	420.79	1	1	3	2	2	1	1	1		22017	Putative Ras-related protein Rab-1C OS=Homo sapiens OX=9606 GN=RAB1C PE=5 SV=2
1183	2356	Q9H0U4|RAB1B_HUMAN	1469.7	1846.3	1199.6	0	1380.2	420.79	1	1	3	2	2	1	1	1		22171	Ras-related protein Rab-1B OS=Homo sapiens OX=9606 GN=RAB1B PE=1 SV=1
1183	2357	Q9NRW1|RAB6B_HUMAN	1469.7	1846.3	1199.6	0	1380.2	420.79	1	1	3	2	2	1	1	1		23462	Ras-related protein Rab-6B OS=Homo sapiens OX=9606 GN=RAB6B PE=1 SV=1
1183	2369	Q15771|RAB30_HUMAN	1469.7	1846.3	1199.6	0	1380.2	420.79	1	1	3	2	2	1	1	1		23058	Ras-related protein Rab-30 OS=Homo sapiens OX=9606 GN=RAB30 PE=1 SV=2
1183	2381	P61026|RAB10_HUMAN	1469.7	1846.3	1199.6	0	1380.2	420.79	1	1	3	2	2	1	1	1		22541	Ras-related protein Rab-10 OS=Homo sapiens OX=9606 GN=RAB10 PE=1 SV=1
1183	2382	P61106|RAB14_HUMAN	1469.7	1846.3	1199.6	0	1380.2	420.79	1	1	3	2	2	1	1	1		23897	Ras-related protein Rab-14 OS=Homo sapiens OX=9606 GN=RAB14 PE=1 SV=4
1183	2414	P59190|RAB15_HUMAN	1469.7	1846.3	1199.6	0	1380.2	420.79	1	1	3	2	2	1	1	1		24391	Ras-related protein Rab-15 OS=Homo sapiens OX=9606 GN=RAB15 PE=1 SV=1
1183	2437	Q92930|RAB8B_HUMAN	1469.7	1846.3	1199.6	0	1380.2	420.79	1	1	3	2	2	1	1	1		23584	Ras-related protein Rab-8B OS=Homo sapiens OX=9606 GN=RAB8B PE=1 SV=2
1183	2485	Q96AX2|RAB37_HUMAN	1469.7	1846.3	1199.6	0	1380.2	420.79	1	1	3	2	2	1	1	1		24815	Ras-related protein Rab-37 OS=Homo sapiens OX=9606 GN=RAB37 PE=1 SV=3
1183	2508	Q9H082|RB33B_HUMAN	1469.7	1846.3	1199.6	0	1380.2	420.79	1	1	3	2	2	1	1	1		25717	Ras-related protein Rab-33B OS=Homo sapiens OX=9606 GN=RAB33B PE=1 SV=1
1183	2582	Q6IQ22|RAB12_HUMAN	1469.7	1846.3	1199.6	0	1380.2	420.79	1	1	3	2	2	1	1	1		27248	Ras-related protein Rab-12 OS=Homo sapiens OX=9606 GN=RAB12 PE=1 SV=3
1183	2597	P61006|RAB8A_HUMAN	1469.7	1846.3	1199.6	0	1380.2	420.79	1	1	3	2	2	1	1	1		23668	Ras-related protein Rab-8A OS=Homo sapiens OX=9606 GN=RAB8A PE=1 SV=1
1183	2647	P20340|RAB6A_HUMAN	1469.7	1846.3	1199.6	0	1380.2	420.79	1	1	3	2	2	1	1	1		23593	Ras-related protein Rab-6A OS=Homo sapiens OX=9606 GN=RAB6A PE=1 SV=3
1183	2655	Q86YS6|RAB43_HUMAN	1469.7	1846.3	1199.6	0	1380.2	420.79	1	1	3	2	2	1	1	1		23339	Ras-related protein Rab-43 OS=Homo sapiens OX=9606 GN=RAB43 PE=1 SV=1
1183	2662	Q96E17|RAB3C_HUMAN	1469.7	1846.3	1199.6	0	1380.2	420.79	1	1	3	2	2	1	1	1		25952	Ras-related protein Rab-3C OS=Homo sapiens OX=9606 GN=RAB3C PE=1 SV=1
1183	3002	Q15286|RAB35_HUMAN	1469.7	1846.3	1199.6	0	1380.2	420.79	1	1	3	2	2	1	1	1		23025	Ras-related protein Rab-35 OS=Homo sapiens OX=9606 GN=RAB35 PE=1 SV=1
1183	3023	P20338|RAB4A_HUMAN	1469.7	1846.3	1199.6	0	1380.2	420.79	1	1	3	2	2	1	1	1		24390	Ras-related protein Rab-4A OS=Homo sapiens OX=9606 GN=RAB4A PE=1 SV=3
1183	3120	Q9NP90|RAB9B_HUMAN	1469.7	1846.3	1199.6	0	1380.2	420.79	1	1	3	2	2	1	1	1		22719	Ras-related protein Rab-9B OS=Homo sapiens OX=9606 GN=RAB9B PE=1 SV=1
1183	3161	P20336|RAB3A_HUMAN	1469.7	1846.3	1199.6	0	1380.2	420.79	1	1	3	2	2	1	1	1		24984	Ras-related protein Rab-3A OS=Homo sapiens OX=9606 GN=RAB3A PE=1 SV=1
1183	3233	Q9BZG1|RAB34_HUMAN	1469.7	1846.3	1199.6	0	1380.2	420.79	1	1	3	2	2	1	1	1		29044	Ras-related protein Rab-34 OS=Homo sapiens OX=9606 GN=RAB34 PE=1 SV=1
1183	3442	Q96DA2|RB39B_HUMAN	1469.7	1846.3	1199.6	0	1380.2	420.79	1	1	3	2	2	1	1	1		24622	Ras-related protein Rab-39B OS=Homo sapiens OX=9606 GN=RAB39B PE=1 SV=1
1183	3443	Q14964|RB39A_HUMAN	1469.7	1846.3	1199.6	0	1380.2	420.79	1	1	3	2	2	1	1	1		25007	Ras-related protein Rab-39A OS=Homo sapiens OX=9606 GN=RAB39A PE=1 SV=2
1183	3444	O00194|RB27B_HUMAN	1469.7	1846.3	1199.6	0	1380.2	420.79	1	1	3	2	2	1	1	1		24608	Ras-related protein Rab-27B OS=Homo sapiens OX=9606 GN=RAB27B PE=1 SV=4
1183	3445	P20337|RAB3B_HUMAN	1469.7	1846.3	1199.6	0	1380.2	420.79	1	1	3	2	2	1	1	1		24758	Ras-related protein Rab-3B OS=Homo sapiens OX=9606 GN=RAB3B PE=1 SV=2
1481	2143	Q92597|NDRG1_HUMAN				353.21	599.97	244.78	1	1	0	0	0	1	1	1		42835	Protein NDRG1 OS=Homo sapiens OX=9606 GN=NDRG1 PE=1 SV=1
1987	3109	Q9NQS3|NECT3_HUMAN		0					1	1	0	1	0	0	0	0		61003	Nectin-3 OS=Homo sapiens OX=9606 GN=NECTIN3 PE=1 SV=1
1398	1806	O95196|CSPG5_HUMAN	1667.2	2302.2	1142.8				1	1	1	2	1	0	0	0		60016	Chondroitin sulfate proteoglycan 5 OS=Homo sapiens OX=9606 GN=CSPG5 PE=1 SV=3
1479	1676	Q9Y639|NPTN_HUMAN	0		0	124.29			1	1	1	0	1	1	0	0	Carbamidomethylation	44387	Neuroplastin OS=Homo sapiens OX=9606 GN=NPTN PE=1 SV=2
1495	1415	P04229|2B11_HUMAN	0	446.67					2	2	2	1	0	0	0	0	Carbamidomethylation	29914	HLA class II histocompatibility antigen DRB1-1 beta chain OS=Homo sapiens OX=9606 GN=HLA-DRB1 PE=1 SV=2
1495	1421	P01911|2B1F_HUMAN	0	446.67					2	2	2	1	0	0	0	0	Carbamidomethylation	29966	HLA class II histocompatibility antigen DRB1-15 beta chain OS=Homo sapiens OX=9606 GN=HLA-DRB1 PE=1 SV=2
1495	1422	Q29974|2B1G_HUMAN	0	446.67					2	2	2	1	0	0	0	0	Carbamidomethylation	30030	HLA class II histocompatibility antigen DRB1-16 beta chain OS=Homo sapiens OX=9606 GN=HLA-DRB1 PE=1 SV=1
1495	1794	P13760|2B14_HUMAN	0	446.67					2	2	2	1	0	0	0	0	Carbamidomethylation	30112	HLA class II histocompatibility antigen DRB1-4 beta chain OS=Homo sapiens OX=9606 GN=HLA-DRB1 PE=1 SV=1
1358	1616	Q9GZX3|CHST6_HUMAN	443.83			710.27		3863.6	2	2	1	0	0	1	0	3	Carbamidomethylation	44099	Carbohydrate sulfotransferase 6 OS=Homo sapiens OX=9606 GN=CHST6 PE=1 SV=1
1528	3088	P61077|UB2D3_HUMAN				140.72		398.92	1	1	0	0	0	1	0	2	Carbamidomethylation	16687	Ubiquitin-conjugating enzyme E2 D3 OS=Homo sapiens OX=9606 GN=UBE2D3 PE=1 SV=1
1528	3089	P62837|UB2D2_HUMAN				140.72		398.92	1	1	0	0	0	1	0	2	Carbamidomethylation	16735	Ubiquitin-conjugating enzyme E2 D2 OS=Homo sapiens OX=9606 GN=UBE2D2 PE=1 SV=1
1436	1756	Q92935|EXTL1_HUMAN				0			2	1	0	0	0	1	0	3		74697	Exostosin-like 1 OS=Homo sapiens OX=9606 GN=EXTL1 PE=2 SV=2
1254	2543	Q9UI40|NCKX2_HUMAN	299.61	329.14	236.31				2	2	4	2	2	0	0	0		73664	Sodium/potassium/calcium exchanger 2 OS=Homo sapiens OX=9606 GN=SLC24A2 PE=1 SV=1
1636	2375	Q9ULH4|LRFN2_HUMAN	126.08		0				1	1	1	0	1	0	0	0		84731	Leucine-rich repeat and fibronectin type-III domain-containing protein 2 OS=Homo sapiens OX=9606 GN=LRFN2 PE=1 SV=2
1609	2018	Q9NUP9|LIN7C_HUMAN	0				3436.5		2	2	1	0	0	0	1	0	Acetylation (Protein N-term)	21834	Protein lin-7 homolog C OS=Homo sapiens OX=9606 GN=LIN7C PE=1 SV=1
1432	2330	P35080|PROF2_HUMAN	0	0	0				1	1	1	1	2	0	0	0		15046	Profilin-2 OS=Homo sapiens OX=9606 GN=PFN2 PE=1 SV=3
1416	1642	P01036|CYTS_HUMAN	0		0		0		2	2	1	0	2	0	1	0	Carbamidomethylation	16214	Cystatin-S OS=Homo sapiens OX=9606 GN=CST4 PE=1 SV=3
1416	1855	P01037|CYTN_HUMAN	0		0		0		2	2	1	0	2	0	1	0	Carbamidomethylation	16388	Cystatin-SN OS=Homo sapiens OX=9606 GN=CST1 PE=1 SV=3
1076	1608	Q8N9C0|IGS22_HUMAN				4327.3	7170	989.95	2	1	0	0	0	6	6	3		100400	Immunoglobulin superfamily member 22 OS=Homo sapiens OX=9606 GN=IGSF22 PE=2 SV=2
1256	3094	P23297|S10A1_HUMAN	0	0		792.83	819.9	0	1	1	1	1	0	2	2	2	Acetylation (Protein N-term)	10546	Protein S100-A1 OS=Homo sapiens OX=9606 GN=S100A1 PE=1 SV=2
1228	1403	P55774|CCL18_HUMAN				1068.7	1317.3	2093.6	3	3	0	0	0	4	1	4	Carbamidomethylation	9849	C-C motif chemokine 18 OS=Homo sapiens OX=9606 GN=CCL18 PE=1 SV=1
1497	1703	Q9P2E7|PCD10_HUMAN	0	0					2	1	1	2	0	0	0	0	Carbamidomethylation	112936	Protocadherin-10 OS=Homo sapiens OX=9606 GN=PCDH10 PE=2 SV=2
1132	1385	P38646|GRP75_HUMAN						171.48	2	1	3	2	1	2	2	2		73681	Stress-70 protein mitochondrial OS=Homo sapiens OX=9606 GN=HSPA9 PE=1 SV=2
1419	2302	Q9UBU2|DKK2_HUMAN				863.53	1123.6	434.54	1	1	0	0	0	1	2	1	Carbamidomethylation	28447	Dickkopf-related protein 2 OS=Homo sapiens OX=9606 GN=DKK2 PE=2 SV=1
1600	1440	Q9H8J5|MANS1_HUMAN			0				2	2	0	0	2	0	0	0		46810	MANSC domain-containing protein 1 OS=Homo sapiens OX=9606 GN=MANSC1 PE=2 SV=1
1569	1585	P05107|ITB2_HUMAN				0		172.85	2	2	0	0	0	1	0	1	Carbamidomethylation	84782	Integrin beta-2 OS=Homo sapiens OX=9606 GN=ITGB2 PE=1 SV=2
1556	2109	Q86VB7|C163A_HUMAN		222.77					1	1	0	2	0	0	0	0	Carbamidomethylation	125451	Scavenger receptor cysteine-rich type 1 protein M130 OS=Homo sapiens OX=9606 GN=CD163 PE=1 SV=2
1180	1543	A8K2U0|A2ML1_HUMAN					1333.8	890.37	2	1	2	0	1	1	4	2		161106	Alpha-2-macroglobulin-like protein 1 OS=Homo sapiens OX=9606 GN=A2ML1 PE=1 SV=3
1601	1519	P06576|ATPB_HUMAN					0	0	1	1	0	0	0	0	1	1		56560	ATP synthase subunit beta mitochondrial OS=Homo sapiens OX=9606 GN=ATP5F1B PE=1 SV=3
1560	1450	Q6ZMJ2|SCAR5_HUMAN				123.67		0	1	1	0	0	0	1	0	1	Carbamidomethylation	53994	Scavenger receptor class A member 5 OS=Homo sapiens OX=9606 GN=SCARA5 PE=2 SV=1
1985	3091	Q5JS37|NHLC3_HUMAN		0					1	1	0	1	0	0	0	0	Carbamidomethylation	38283	NHL repeat-containing protein 3 OS=Homo sapiens OX=9606 GN=NHLRC3 PE=2 SV=1
1523	2608	Q9Y3B3|TMED7_HUMAN	0	88.637					1	1	1	2	0	0	0	0	Carbamidomethylation	25172	Transmembrane emp24 domain-containing protein 7 OS=Homo sapiens OX=9606 GN=TMED7 PE=1 SV=2
1608	1675	Q9NQ76|MEPE_HUMAN				0	0		2	2	0	0	0	1	1	0	Carbamidomethylation	58419	Matrix extracellular phosphoglycoprotein OS=Homo sapiens OX=9606 GN=MEPE PE=1 SV=1
1998	3447	Q9NZD2|GLTP_HUMAN						0	1	1	0	0	0	0	0	1	Carbamidomethylation	23850	Glycolipid transfer protein OS=Homo sapiens OX=9606 GN=GLTP PE=1 SV=3
1515	1609	Q9GZV7|HPLN2_HUMAN	115.14	0					2	2	2	1	0	0	0	0	Carbamidomethylation	37775	Hyaluronan and proteoglycan link protein 2 OS=Homo sapiens OX=9606 GN=HAPLN2 PE=2 SV=1
1385	2515	P49006|MRP_HUMAN				316.21	357.17		1	1	0	0	0	3	2	0		19529	MARCKS-related protein OS=Homo sapiens OX=9606 GN=MARCKSL1 PE=1 SV=2
1407	2283	Q8WUJ3|CEMIP_HUMAN				470.4	445.06	196.04	1	1	0	0	0	1	2	1		152997	Cell migration-inducing and hyaluronan-binding protein OS=Homo sapiens OX=9606 GN=CEMIP PE=1 SV=2
1924	2003	P15586|GNS_HUMAN				0			1	1	0	0	0	1	0	0		62082	N-acetylglucosamine-6-sulfatase OS=Homo sapiens OX=9606 GN=GNS PE=1 SV=3
1567	1698	Q8IZJ3|CPMD8_HUMAN	0						2	1	1	0	0	0	0	1		206700	C3 and PZP-like alpha-2-macroglobulin domain-containing protein 8 OS=Homo sapiens OX=9606 GN=CPAMD8 PE=1 SV=2
1633	1947	Q5VSP4|LC1L1_HUMAN				696.89	796.18		1	1	0	0	0	1	1	0		17918	Putative lipocalin 1-like protein 1 OS=Homo sapiens OX=9606 GN=LCN1P1 PE=5 SV=1
1633	2441	P31025|LCN1_HUMAN				696.89	796.18		1	1	0	0	0	1	1	0		19250	Lipocalin-1 OS=Homo sapiens OX=9606 GN=LCN1 PE=1 SV=1
1475	1665	Q92797|SYMPK_HUMAN	814.76			0		0	2	2	1	0	0	1	0	1		141148	Symplekin OS=Homo sapiens OX=9606 GN=SYMPK PE=1 SV=2
1453	1452	Q6UVK1|CSPG4_HUMAN	0	0					1	1	1	2	0	0	0	0		250534	Chondroitin sulfate proteoglycan 4 OS=Homo sapiens OX=9606 GN=CSPG4 PE=1 SV=2
1524	2621	Q7L266|ASGL1_HUMAN				236.46		0	1	1	0	0	0	1	0	2	Carbamidomethylation	32055	Isoaspartyl peptidase/L-asparaginase OS=Homo sapiens OX=9606 GN=ASRGL1 PE=1 SV=2
1947	2577	Q9ULV4|COR1C_HUMAN					0		1	1	0	0	0	0	1	0		53249	Coronin-1C OS=Homo sapiens OX=9606 GN=CORO1C PE=1 SV=1
1430	1769	Q9UQM7|KCC2A_HUMAN		0		0	0		2	2	0	1	0	1	2	0		54088	Calcium/calmodulin-dependent protein kinase type II subunit alpha OS=Homo sapiens OX=9606 GN=CAMK2A PE=1 SV=2
1305	2545	P27701|CD82_HUMAN	0	0		1247.6	1260.8	899.88	1	1	1	3	0	1	1	1		29626	CD82 antigen OS=Homo sapiens OX=9606 GN=CD82 PE=1 SV=1
1582	1705	P13667|PDIA4_HUMAN					0	0	2	2	0	0	0	0	1	1		72933	Protein disulfide-isomerase A4 OS=Homo sapiens OX=9606 GN=PDIA4 PE=1 SV=2
1283	1449	P0DOX4|IGE_HUMAN	0			4704.7	4749.8	16372	2	2	1	0	0	2	2	2		60323	Immunoglobulin epsilon heavy chain OS=Homo sapiens OX=9606 PE=1 SV=1
1433	2511	Q9UHF0|TKNK_HUMAN	0	1015.3	0				1	1	1	1	2	0	0	0		13438	Tachykinin-3 OS=Homo sapiens OX=9606 GN=TAC3 PE=1 SV=1
1617	1669	P09651|ROA1_HUMAN			192.21			0	2	2	0	0	1	0	0	1		38747	Heterogeneous nuclear ribonucleoprotein A1 OS=Homo sapiens OX=9606 GN=HNRNPA1 PE=1 SV=5
1645	2760	P22466|GALA_HUMAN		385.54					1	1	0	2	0	0	0	0		13302	Galanin peptides OS=Homo sapiens OX=9606 GN=GAL PE=1 SV=3
1607	2278	P43034|LIS1_HUMAN				0	218.57		1	1	0	0	0	1	1	0		46638	Platelet-activating factor acetylhydrolase IB subunit alpha OS=Homo sapiens OX=9606 GN=PAFAH1B1 PE=1 SV=2
1367	1871	C9JVW0|INAM1_HUMAN	1676.4	1437.5	1241.6		357.42		2	2	1	2	1	0	1	0		14668	Putative transmembrane protein INAFM1 OS=Homo sapiens OX=9606 GN=INAFM1 PE=4 SV=1
1644	2615	Q3LXA3|TKFC_HUMAN				0	0		1	1	0	0	0	1	1	0		58947	Triokinase/FMN cyclase OS=Homo sapiens OX=9606 GN=TKFC PE=1 SV=2
1658	3450	Q96QA5|GSDMA_HUMAN					214.21	94.305	1	1	0	0	0	0	1	1		49365	Gasdermin-A OS=Homo sapiens OX=9606 GN=GSDMA PE=1 SV=4
1642	2527	P09429|HMGB1_HUMAN					302.07		1	1	0	0	0	0	2	0		24894	High mobility group protein B1 OS=Homo sapiens OX=9606 GN=HMGB1 PE=1 SV=3
1516	1814	Q9UBI6|GBG12_HUMAN	0	0					1	1	2	1	0	0	0	0	Carbamidomethylation	8006	Guanine nucleotide-binding protein G(I)/G(S)/G(O) subunit gamma-12 OS=Homo sapiens OX=9606 GN=GNG12 PE=1 SV=3
1853	1865	Q96AP7|ESAM_HUMAN			0				1	1	0	0	1	0	0	0	Carbamidomethylation	41176	Endothelial cell-selective adhesion molecule OS=Homo sapiens OX=9606 GN=ESAM PE=1 SV=1
1595	1655	O94923|GLCE_HUMAN					242.92	448.69	2	2	0	0	0	0	1	1	Carbamidomethylation	70101	D-glucuronyl C5-epimerase OS=Homo sapiens OX=9606 GN=GLCE PE=1 SV=3
1517	2103	P55001|MFAP2_HUMAN	0	675.68	358.84				1	1	1	1	1	0	0	0	Carbamidomethylation	20826	Microfibrillar-associated protein 2 OS=Homo sapiens OX=9606 GN=MFAP2 PE=2 SV=1
1506	2124	Q96C19|EFHD2_HUMAN				0	0		1	1	0	0	0	2	1	0		26697	EF-hand domain-containing protein D2 OS=Homo sapiens OX=9606 GN=EFHD2 PE=1 SV=1
1652	3451	Q9H1C7|CYTM1_HUMAN		219.01	0				1	1	0	1	1	0	0	0		10631	Cysteine-rich and transmembrane domain-containing protein 1 OS=Homo sapiens OX=9606 GN=CYSTM1 PE=1 SV=1
1807	1951	P50895|BCAM_HUMAN	0						1	1	1	0	0	0	0	0		67405	Basal cell adhesion molecule OS=Homo sapiens OX=9606 GN=BCAM PE=1 SV=2
1427	2423	Q00169|PIPNA_HUMAN				254.05	142.45	266.95	1	1	0	0	0	1	2	1		31806	Phosphatidylinositol transfer protein alpha isoform OS=Homo sapiens OX=9606 GN=PITPNA PE=1 SV=2
1938	2552	P42330|AK1C3_HUMAN					0		1	1	0	0	0	0	1	0	Carbamidomethylation	36853	Aldo-keto reductase family 1 member C3 OS=Homo sapiens OX=9606 GN=AKR1C3 PE=1 SV=4
1938	2638	Q04828|AK1C1_HUMAN					0		1	1	0	0	0	0	1	0	Carbamidomethylation	36788	Aldo-keto reductase family 1 member C1 OS=Homo sapiens OX=9606 GN=AKR1C1 PE=1 SV=1
1885	1462	P02545|LMNA_HUMAN						0	1	1	0	0	0	0	0	1		74140	Prelamin-A/C OS=Homo sapiens OX=9606 GN=LMNA PE=1 SV=1
1999	3455	P13598|ICAM2_HUMAN		114.31					1	1	0	1	0	0	0	0		30654	Intercellular adhesion molecule 2 OS=Homo sapiens OX=9606 GN=ICAM2 PE=1 SV=2
1978	3111	P52803|EFNA5_HUMAN			0				1	1	0	0	1	0	0	0	Carbamidomethylation	26297	Ephrin-A5 OS=Homo sapiens OX=9606 GN=EFNA5 PE=1 SV=1
1290	2279	Q8NFF2|NCKX4_HUMAN				942.07	1278.2	616.73	1	1	0	0	0	3	3	1		69042	Sodium/potassium/calcium exchanger 4 OS=Homo sapiens OX=9606 GN=SLC24A4 PE=1 SV=2
1533	3453	O15511|ARPC5_HUMAN				470.52	536.87		1	1	0	0	0	2	1	0		16320	Actin-related protein 2/3 complex subunit 5 OS=Homo sapiens OX=9606 GN=ARPC5 PE=1 SV=3
1578	2041	P09619|PGFRB_HUMAN		0	0				1	1	0	1	1	0	0	0		123968	Platelet-derived growth factor receptor beta OS=Homo sapiens OX=9606 GN=PDGFRB PE=1 SV=1
1544	1580	Q92824|PCSK5_HUMAN				385.36			2	2	0	0	0	2	0	0	Carbamidomethylation	206941	Proprotein convertase subtilisin/kexin type 5 OS=Homo sapiens OX=9606 GN=PCSK5 PE=1 SV=4
1410	1767	A0A0B4J1U3|LV136_HUMAN				0	0		2	2	0	0	0	2	2	0		12478	Immunoglobulin lambda variable 1-36 OS=Homo sapiens OX=9606 GN=IGLV1-36 PE=1 SV=5
1505	1863	Q16378|PROL4_HUMAN				1128.3		826.93	2	2	0	0	0	1	0	2		15097	Proline-rich protein 4 OS=Homo sapiens OX=9606 GN=PRR4 PE=1 SV=3
1843	1416	Q9Y2G1|MYRF_HUMAN		285.98					1	1	0	1	0	0	0	0		124397	Myelin regulatory factor OS=Homo sapiens OX=9606 GN=MYRF PE=1 SV=3
1518	2489	Q969Z4|TR19L_HUMAN	1020.2		659.89				1	1	1	0	2	0	0	0		46092	Tumor necrosis factor receptor superfamily member 19L OS=Homo sapiens OX=9606 GN=RELT PE=1 SV=1
1640	1840	Q9Y2G8|DJC16_HUMAN				131.32		0	2	2	0	0	0	1	0	1		90591	DnaJ homolog subfamily C member 16 OS=Homo sapiens OX=9606 GN=DNAJC16 PE=2 SV=3
2000	3458	O00585|CCL21_HUMAN				177.45			1	1	0	0	0	1	0	0	Carbamidomethylation	14646	C-C motif chemokine 21 OS=Homo sapiens OX=9606 GN=CCL21 PE=1 SV=1
1503	2249	Q9GZQ8|MLP3B_HUMAN				869.91	963.56	756.42	1	1	0	0	0	1	1	1		14688	Microtubule-associated proteins 1A/1B light chain 3B OS=Homo sapiens OX=9606 GN=MAP1LC3B PE=1 SV=3
1503	2250	A6NCE7|MP3B2_HUMAN				869.91	963.56	756.42	1	1	0	0	0	1	1	1		14628	Microtubule-associated proteins 1A/1B light chain 3 beta 2 OS=Homo sapiens OX=9606 GN=MAP1LC3B2 PE=2 SV=1
1480	1729	Q6VY07|PACS1_HUMAN		0		341.29		1165.2	2	2	0	1	0	1	0	1		104898	Phosphofurin acidic cluster sorting protein 1 OS=Homo sapiens OX=9606 GN=PACS1 PE=1 SV=2
1591	1783	P06280|AGAL_HUMAN	0		0				2	2	1	0	1	0	0	0	Carbamidomethylation	48767	Alpha-galactosidase A OS=Homo sapiens OX=9606 GN=GLA PE=1 SV=1
2001	3459	Q16581|C3AR_HUMAN		364.82					1	1	0	1	0	0	0	0		53864	C3a anaphylatoxin chemotactic receptor OS=Homo sapiens OX=9606 GN=C3AR1 PE=1 SV=2
1540	1929	A0A1B0GUU1|CQ113_HUMAN	294060						2	2	2	0	0	0	0	0	Carbamidomethylation; Acetylation (Protein N-term)	72432	Transmembrane protein C17orf113 OS=Homo sapiens OX=9606 GN=C17orf113 PE=3 SV=1
1549	1506	P25391|LAMA1_HUMAN				2208.8			2	1	0	0	0	1	1	0	Carbamidomethylation; Acetylation (Protein N-term)	337084	Laminin subunit alpha-1 OS=Homo sapiens OX=9606 GN=LAMA1 PE=1 SV=2
1650	1833	Q08257|QOR_HUMAN					284.87		2	2	0	0	0	0	2	0		35207	Quinone oxidoreductase OS=Homo sapiens OX=9606 GN=CRYZ PE=1 SV=1
1877	1930	Q8NBS9|TXND5_HUMAN					159.94		1	1	0	0	0	0	1	0		47629	Thioredoxin domain-containing protein 5 OS=Homo sapiens OX=9606 GN=TXNDC5 PE=1 SV=2
1420	2378	P27658|CO8A1_HUMAN	0			284.12		445.54	1	1	1	0	0	1	0	2		73364	Collagen alpha-1(VIII) chain OS=Homo sapiens OX=9606 GN=COL8A1 PE=1 SV=2
1368	2402	P51512|MMP16_HUMAN	196.99	300.79	70.158				1	1	1	2	2	0	0	0		69522	Matrix metalloproteinase-16 OS=Homo sapiens OX=9606 GN=MMP16 PE=1 SV=2
1424	3037	P21266|GSTM3_HUMAN	0			0	0		1	1	1	0	0	1	2	0		26560	Glutathione S-transferase Mu 3 OS=Homo sapiens OX=9606 GN=GSTM3 PE=1 SV=3
1900	2351	Q15256|PTPRR_HUMAN	207.13						1	1	1	0	0	0	0	0		73834	Receptor-type tyrosine-protein phosphatase R OS=Homo sapiens OX=9606 GN=PTPRR PE=1 SV=2
1989	3238	P02794|FRIH_HUMAN		0					1	1	0	1	0	0	0	0		21226	Ferritin heavy chain OS=Homo sapiens OX=9606 GN=FTH1 PE=1 SV=2
1624	2534	P02511|CRYAB_HUMAN	0	0					1	1	1	1	0	0	0	0		20159	Alpha-crystallin B chain OS=Homo sapiens OX=9606 GN=CRYAB PE=1 SV=2
1604	1816	A0A075B6K6|LV403_HUMAN					561.19	4003.8	2	2	0	0	0	0	1	1		13330	Immunoglobulin lambda variable 4-3 OS=Homo sapiens OX=9606 GN=IGLV4-3 PE=3 SV=1
1469	2013	Q5JZY3|EPHAA_HUMAN	0	0	0				1	1	1	1	1	0	0	0	Carbamidomethylation	109716	Ephrin type-A receptor 10 OS=Homo sapiens OX=9606 GN=EPHA10 PE=1 SV=2
1639	3460	A8MTW9|YB043_HUMAN				1687.1		356.89	1	1	0	0	0	1	0	1		8750	Putative uncharacterized protein ENSP00000380674 OS=Homo sapiens OX=9606 PE=5 SV=2
1982	2295	Q9BS26|ERP44_HUMAN		0					1	1	0	1	0	0	0	0	Carbamidomethylation	46971	Endoplasmic reticulum resident protein 44 OS=Homo sapiens OX=9606 GN=ERP44 PE=1 SV=1
1613	2709	P78423|X3CL1_HUMAN	0		635.46				2	2	1	0	1	0	0	0		42203	Fractalkine OS=Homo sapiens OX=9606 GN=CX3CL1 PE=1 SV=1
1945	2284	P04066|FUCO_HUMAN		0					1	1	0	1	0	0	0	0		53689	Tissue alpha-L-fucosidase OS=Homo sapiens OX=9606 GN=FUCA1 PE=1 SV=4
1891	2221	P48735|IDHP_HUMAN					0		1	1	0	0	0	0	1	0		50909	Isocitrate dehydrogenase [NADP] mitochondrial OS=Homo sapiens OX=9606 GN=IDH2 PE=1 SV=2
1796	1997	O75976|CBPD_HUMAN	0						1	1	1	0	0	0	0	0		152931	Carboxypeptidase D OS=Homo sapiens OX=9606 GN=CPD PE=1 SV=2
1678	1406	P02458|CO2A1_HUMAN				330.98			1	1	0	0	0	1	0	0	Carbamidomethylation	141786	Collagen alpha-1(II) chain OS=Homo sapiens OX=9606 GN=COL2A1 PE=1 SV=3
1960	2205	Q92185|SIA8A_HUMAN				0			1	1	0	0	0	1	0	0		40519	Alpha-N-acetylneuraminide alpha-2 8-sialyltransferase OS=Homo sapiens OX=9606 GN=ST8SIA1 PE=1 SV=1
1988	3166	P14621|ACYP2_HUMAN					0		1	1	0	0	0	0	1	0		11140	Acylphosphatase-2 OS=Homo sapiens OX=9606 GN=ACYP2 PE=1 SV=2
2002	3464	O95715|CXL14_HUMAN				0			1	1	0	0	0	1	0	0	Carbamidomethylation	13078	C-X-C motif chemokine 14 OS=Homo sapiens OX=9606 GN=CXCL14 PE=1 SV=2
1605	1844	P27797|CALR_HUMAN	0						2	2	2	0	0	0	0	0		48142	Calreticulin OS=Homo sapiens OX=9606 GN=CALR PE=1 SV=1
1913	2153	P04632|CPNS1_HUMAN						624.11	1	1	0	0	0	0	0	1		28316	Calpain small subunit 1 OS=Homo sapiens OX=9606 GN=CAPNS1 PE=1 SV=1
1620	2185	P78333|GPC5_HUMAN				181.26	209.45		1	1	0	0	0	1	1	0		63707	Glypican-5 OS=Homo sapiens OX=9606 GN=GPC5 PE=2 SV=1
1744	1626	Q9Y490|TLN1_HUMAN					110.63		1	1	0	0	0	0	1	0	Carbamidomethylation	269765	Talin-1 OS=Homo sapiens OX=9606 GN=TLN1 PE=1 SV=3
1501	2270	P29218|IMPA1_HUMAN	0	0					1	1	2	1	0	0	0	0		30189	Inositol monophosphatase 1 OS=Homo sapiens OX=9606 GN=IMPA1 PE=1 SV=1
1197	3170	P24522|GA45A_HUMAN				22856	13480	10563	1	1	0	0	0	3	2	5	Acetylation (Protein N-term)	18336	Growth arrest and DNA damage-inducible protein GADD45 alpha OS=Homo sapiens OX=9606 GN=GADD45A PE=1 SV=1
1899	2015	O75449|KTNA1_HUMAN				343.67			1	1	0	0	0	1	0	0		55965	Katanin p60 ATPase-containing subunit A1 OS=Homo sapiens OX=9606 GN=KATNA1 PE=1 SV=1
1651	2888	P54709|AT1B3_HUMAN	0	0					1	1	1	1	0	0	0	0		31513	Sodium/potassium-transporting ATPase subunit beta-3 OS=Homo sapiens OX=9606 GN=ATP1B3 PE=1 SV=1
1632	1839	P05305|EDN1_HUMAN				421.8	1689.8		2	2	0	0	0	1	1	0		24425	Endothelin-1 OS=Homo sapiens OX=9606 GN=EDN1 PE=1 SV=1
1471	2091	O14525|ASTN1_HUMAN	84.03	0					1	1	1	2	0	0	0	0		144913	Astrotactin-1 OS=Homo sapiens OX=9606 GN=ASTN1 PE=2 SV=3
1880	2314	Q13421|MSLN_HUMAN			0				1	1	0	0	1	0	0	0		68986	Mesothelin OS=Homo sapiens OX=9606 GN=MSLN PE=1 SV=2
1350	1897	Q9NZJ4|SACS_HUMAN				1014.6	1444.3	684.15	1	1	0	0	0	3	1	1		521131	Sacsin OS=Homo sapiens OX=9606 GN=SACS PE=1 SV=2
1068	2350	Q5VYK3|ECM29_HUMAN	3363.8	0		0	0	4125.3	1	1	1	3	0	5	4	2		204289	Proteasome adapter and scaffold protein ECM29 OS=Homo sapiens OX=9606 GN=ECPAS PE=1 SV=2
1374	2458	Q5T442|CXG2_HUMAN				1187.1	449.95	0	1	1	0	0	0	2	2	1		47002	Gap junction gamma-2 protein OS=Homo sapiens OX=9606 GN=GJC2 PE=1 SV=1
1511	1864	P52566|GDIR2_HUMAN				165.25	258.79	84.701	1	1	0	0	0	1	1	1		22988	Rho GDP-dissociation inhibitor 2 OS=Homo sapiens OX=9606 GN=ARHGDIB PE=1 SV=3
1592	2199	Q13275|SEM3F_HUMAN				524.5		392.82	1	1	0	0	0	1	0	1	Carbamidomethylation	88381	Semaphorin-3F OS=Homo sapiens OX=9606 GN=SEMA3F PE=2 SV=2
1487	2126	O75629|CREG1_HUMAN	1269.7	642.66	946.46				1	1	1	1	1	0	0	0		24075	Protein CREG1 OS=Homo sapiens OX=9606 GN=CREG1 PE=1 SV=1
1991	3473	P59768|GBG2_HUMAN		0					1	1	0	1	0	0	0	0		7850	Guanine nucleotide-binding protein G(I)/G(S)/G(O) subunit gamma-2 OS=Homo sapiens OX=9606 GN=GNG2 PE=1 SV=2
1380	2521	Q6P4E1|CASC4_HUMAN	396.64	1717.4		697.7	179.73	296.26	1	1	1	1	0	1	1	1		49498	Protein CASC4 OS=Homo sapiens OX=9606 GN=CASC4 PE=1 SV=2
1593	2211	Q9P0G3|KLK14_HUMAN				856.59	864.81		1	1	0	0	0	1	1	0	Carbamidomethylation; Oxidation (M)	29122	Kallikrein-14 OS=Homo sapiens OX=9606 GN=KLK14 PE=1 SV=2
1260	2502	Q5DX21|IGS11_HUMAN	204.28	134.64	113.98				1	1	3	2	3	0	0	0		46120	Immunoglobulin superfamily member 11 OS=Homo sapiens OX=9606 GN=IGSF11 PE=2 SV=3
1646	3064	P84095|RHOG_HUMAN		0	0				1	1	0	1	1	0	0	0		21308	Rho-related GTP-binding protein RhoG OS=Homo sapiens OX=9606 GN=RHOG PE=1 SV=1
1892	2229	Q8IWU6|SULF1_HUMAN				510.65			1	1	0	0	0	1	0	0	Carbamidomethylation	101027	Extracellular sulfatase Sulf-1 OS=Homo sapiens OX=9606 GN=SULF1 PE=1 SV=1
1901	2352	Q9ULL4|PLXB3_HUMAN	0						1	1	1	0	0	0	0	0		206846	Plexin-B3 OS=Homo sapiens OX=9606 GN=PLXNB3 PE=1 SV=2
1730	1604	Q4LDE5|SVEP1_HUMAN					612.02		1	1	0	0	0	0	1	0	Carbamidomethylation	390171	Sushi von Willebrand factor type A EGF and pentraxin domain-containing protein 1 OS=Homo sapiens OX=9606 GN=SVEP1 PE=1 SV=3
1622	2341	Q9Y266|NUDC_HUMAN				550.26	238.31		1	1	0	0	0	1	1	0		38243	Nuclear migration protein nudC OS=Homo sapiens OX=9606 GN=NUDC PE=1 SV=1
1565	1548	Q9NR99|MXRA5_HUMAN				234.16	0		2	2	0	0	0	1	1	0		312149	Matrix-remodeling-associated protein 5 OS=Homo sapiens OX=9606 GN=MXRA5 PE=1 SV=3
1025	2201	P10828|THB_HUMAN	381.82	0	0	2432.3	1536.6	2254.8	1	1	3	1	4	5	3	2		52788	Thyroid hormone receptor beta OS=Homo sapiens OX=9606 GN=THRB PE=1 SV=2
1025	2292	P10827|THA_HUMAN	381.82	0	0	2432.3	1536.6	2254.8	1	1	3	1	4	5	3	2		54816	Thyroid hormone receptor alpha OS=Homo sapiens OX=9606 GN=THRA PE=1 SV=1
1025	2789	Q86TJ2|TAD2B_HUMAN	381.82	0	0	2432.3	1536.6	2254.8	1	1	3	1	4	5	3	2		48470	Transcriptional adapter 2-beta OS=Homo sapiens OX=9606 GN=TADA2B PE=1 SV=2
1167	2082	O60307|MAST3_HUMAN	352.66	5034.2	1393.2	2336.9	1925.3		1	1	1	4	4	1	1	0		143137	Microtubule-associated serine/threonine-protein kinase 3 OS=Homo sapiens OX=9606 GN=MAST3 PE=1 SV=2
1504	2299	Q8N111|CEND_HUMAN					357.62		1	1	0	0	0	0	3	0		14954	Cell cycle exit and neuronal differentiation protein 1 OS=Homo sapiens OX=9606 GN=CEND1 PE=1 SV=1
1772	1742	Q5JRA6|TGO1_HUMAN		86.619					1	1	0	1	0	0	0	0		213700	Transport and Golgi organization protein 1 homolog OS=Homo sapiens OX=9606 GN=MIA3 PE=1 SV=1
1959	2071	Q92620|PRP16_HUMAN				35411			1	1	0	0	0	1	0	0		140502	Pre-mRNA-splicing factor ATP-dependent RNA helicase PRP16 OS=Homo sapiens OX=9606 GN=DHX38 PE=1 SV=2
1606	2019	Q9HCU0|CD248_HUMAN	0		0				1	1	1	0	1	0	0	0	Carbamidomethylation	80859	Endosialin OS=Homo sapiens OX=9606 GN=CD248 PE=1 SV=1
1976	2994	Q9NPH3|IL1AP_HUMAN			0				1	1	0	0	1	0	0	0		65419	Interleukin-1 receptor accessory protein OS=Homo sapiens OX=9606 GN=IL1RAP PE=1 SV=2
1992	3484	Q9H0B8|CRLD2_HUMAN		0					1	1	0	1	0	0	0	0		55920	Cysteine-rich secretory protein LCCL domain-containing 2 OS=Homo sapiens OX=9606 GN=CRISPLD2 PE=2 SV=1
1413	2191	Q13201|MMRN1_HUMAN				391.14	411.55	0	1	1	0	0	0	2	1	1		138110	Multimerin-1 OS=Homo sapiens OX=9606 GN=MMRN1 PE=1 SV=3
1155	2344	Q9BXW6|OSBL1_HUMAN	2249.4	30723	16093	1611.1			1	1	2	3	5	1	0	0	Carbamidomethylation; Oxidation (M)	108470	Oxysterol-binding protein-related protein 1 OS=Homo sapiens OX=9606 GN=OSBPL1A PE=1 SV=2
1878	1963	O43491|E41L2_HUMAN						177.59	1	1	0	0	0	0	0	1		112588	Band 4.1-like protein 2 OS=Homo sapiens OX=9606 GN=EPB41L2 PE=1 SV=1
1638	2614	P33151|CADH5_HUMAN		151.24	0				1	1	0	1	1	0	0	0		87528	Cadherin-5 OS=Homo sapiens OX=9606 GN=CDH5 PE=1 SV=5
1336	2701	P04054|PA21B_HUMAN	184.06	0	0		457.84		1	1	2	1	2	0	1	0	Carbamidomethylation	16360	Phospholipase A2 OS=Homo sapiens OX=9606 GN=PLA2G1B PE=1 SV=3
1887	2106	Q15293|RCN1_HUMAN		317.22					1	1	0	1	0	0	0	0		38890	Reticulocalbin-1 OS=Homo sapiens OX=9606 GN=RCN1 PE=1 SV=1
1940	2679	Q6UW15|REG3G_HUMAN				648.78			1	1	0	0	0	1	0	0	Carbamidomethylation	19330	Regenerating islet-derived protein 3-gamma OS=Homo sapiens OX=9606 GN=REG3G PE=1 SV=1
1803	2081	P46940|IQGA1_HUMAN						138.33	1	1	0	0	0	0	0	1		189251	Ras GTPase-activating-like protein IQGAP1 OS=Homo sapiens OX=9606 GN=IQGAP1 PE=1 SV=1
1507	2276	P04040|CATA_HUMAN		330.12		0			1	1	0	2	0	1	0	0		59756	Catalase OS=Homo sapiens OX=9606 GN=CAT PE=1 SV=3
1597	1753	Q86X10|RLGPB_HUMAN				797.66			1	1	0	0	0	2	0	0		166798	Ral GTPase-activating protein subunit beta OS=Homo sapiens OX=9606 GN=RALGAPB PE=1 SV=1
1822	1755	Q9UKQ2|ADA28_HUMAN		0					1	1	0	1	0	0	0	0		87148	Disintegrin and metalloproteinase domain-containing protein 28 OS=Homo sapiens OX=9606 GN=ADAM28 PE=2 SV=3
1301	2421	Q5T750|XP32_HUMAN	1127.9		1305.6	354.9	0	260.89	1	1	1	0	1	2	2	1		26238	Skin-specific protein 32 OS=Homo sapiens OX=9606 GN=XP32 PE=1 SV=1
1755	1696	Q6WRI0|IGS10_HUMAN					131.18		1	1	0	0	0	0	1	0		290836	Immunoglobulin superfamily member 10 OS=Homo sapiens OX=9606 GN=IGSF10 PE=1 SV=1
1628	2398	Q9NU53|GINM1_HUMAN	137.18	0					1	1	1	1	0	0	0	0		36840	Glycoprotein integral membrane protein 1 OS=Homo sapiens OX=9606 GN=GINM1 PE=2 SV=1
1414	2281	Q9GZM5|YIPF3_HUMAN	1202.5	1360.8	616.04				1	1	2	1	1	0	0	0		38248	Protein YIPF3 OS=Homo sapiens OX=9606 GN=YIPF3 PE=1 SV=1
1342	3291	P50747|BPL1_HUMAN				730.16	587.36	536.13	1	1	0	0	0	2	2	2		80760	Biotin--protein ligase OS=Homo sapiens OX=9606 GN=HLCS PE=1 SV=1
1635	2269	Q99439|CNN2_HUMAN				0	0		1	1	0	0	0	1	1	0		33697	Calponin-2 OS=Homo sapiens OX=9606 GN=CNN2 PE=1 SV=4
955	2092	O14983|AT2A1_HUMAN		414480	143780	562640	472070	442520	1	1	0	2	1	8	5	5	Carbamidomethylation	110252	Sarcoplasmic/endoplasmic reticulum calcium ATPase 1 OS=Homo sapiens OX=9606 GN=ATP2A1 PE=1 SV=1
1046	2802	Q6PCE3|PGM2L_HUMAN		4963.8	5443.6	49103	44407	39300	1	1	0	1	2	5	4	5	Carbamidomethylation; Acetylation (Protein N-term)	70442	Glucose 1 6-bisphosphate synthase OS=Homo sapiens OX=9606 GN=PGM2L1 PE=1 SV=3
2003	3503	O43508|TNF12_HUMAN						167.2	1	1	0	0	0	0	0	1		27216	Tumor necrosis factor ligand superfamily member 12 OS=Homo sapiens OX=9606 GN=TNFSF12 PE=1 SV=1
1534	3510	O95998|I18BP_HUMAN	0	0					1	1	2	1	0	0	0	0	Carbamidomethylation	21099	Interleukin-18-binding protein OS=Homo sapiens OX=9606 GN=IL18BP PE=1 SV=2
1441	3200	Q04941|PLP2_HUMAN	0	0		349.75			1	1	2	1	0	1	0	0		16691	Proteolipid protein 2 OS=Homo sapiens OX=9606 GN=PLP2 PE=1 SV=1
1943	1848	P59998|ARPC4_HUMAN						188.82	1	1	0	0	0	0	0	1		19667	Actin-related protein 2/3 complex subunit 4 OS=Homo sapiens OX=9606 GN=ARPC4 PE=1 SV=3
1580	1987	P78563|RED1_HUMAN				14389	14125		1	1	0	0	0	1	1	0		80763	Double-stranded RNA-specific editase 1 OS=Homo sapiens OX=9606 GN=ADARB1 PE=1 SV=1
1281	1739	P29475|NOS1_HUMAN	0	5072.7	2609.7				1	1	1	3	3	0	0	0	Acetylation (Protein N-term)	175117	Nitric oxide synthase brain OS=Homo sapiens OX=9606 GN=NOS1 PE=1 SV=2
1914	2361	P08962|CD63_HUMAN				472.01			1	1	0	0	0	1	0	0		25637	CD63 antigen OS=Homo sapiens OX=9606 GN=CD63 PE=1 SV=2
1758	2246	Q9UBC3|DNM3B_HUMAN					169.87		1	1	0	0	0	0	1	0	Oxidation (M); Acetylation (Protein N-term)	95751	DNA (cytosine-5)-methyltransferase 3B OS=Homo sapiens OX=9606 GN=DNMT3B PE=1 SV=1
1944	2218	Q6UWY0|ARSK_HUMAN				10201			1	1	0	0	0	1	0	0		61451	Arylsulfatase K OS=Homo sapiens OX=9606 GN=ARSK PE=1 SV=1
1596	2184	Q53TQ3|IN80D_HUMAN				1275.5	1614		1	1	0	0	0	1	1	0		113202	INO80 complex subunit D OS=Homo sapiens OX=9606 GN=INO80D PE=1 SV=3
1483	2096	Q5VUG0|SMBT2_HUMAN					864.49	1173.3	1	1	0	0	0	0	1	2		100563	Scm-like with four MBT domains protein 2 OS=Homo sapiens OX=9606 GN=SFMBT2 PE=1 SV=1
1905	2695	P21554|CNR1_HUMAN		347.8					1	1	0	1	0	0	0	0		52858	Cannabinoid receptor 1 OS=Homo sapiens OX=9606 GN=CNR1 PE=1 SV=1
1927	2440	Q5JXM2|MET24_HUMAN						0	1	1	0	0	0	0	0	1		41330	Methyltransferase-like protein 24 OS=Homo sapiens OX=9606 GN=METTL24 PE=2 SV=1
1965	2694	Q9HB40|RISC_HUMAN	225.15						1	1	1	0	0	0	0	0		50831	Retinoid-inducible serine carboxypeptidase OS=Homo sapiens OX=9606 GN=SCPEP1 PE=1 SV=1
1949	2640	P15121|ALDR_HUMAN		0					1	1	0	1	0	0	0	0	Carbamidomethylation	35853	Aldo-keto reductase family 1 member B1 OS=Homo sapiens OX=9606 GN=AKR1B1 PE=1 SV=3
1360	2399	A2RUB6|CCD66_HUMAN				9020.9	1316.4	6557	1	1	0	0	0	2	1	2		109411	Coiled-coil domain-containing protein 66 OS=Homo sapiens OX=9606 GN=CCDC66 PE=1 SV=4
1879	2125	Q96JM4|LRIQ1_HUMAN						474.68	1	1	0	0	0	0	0	1		199299	Leucine-rich repeat and IQ domain-containing protein 1 OS=Homo sapiens OX=9606 GN=LRRIQ1 PE=2 SV=3
1130	1899	Q9P2D8|UNC79_HUMAN		180.95		6744.4	7071	6229.9	1	1	0	1	0	3	5	3		295325	Protein unc-79 homolog OS=Homo sapiens OX=9606 GN=UNC79 PE=2 SV=4
1519	3550	Q9GZZ8|LACRT_HUMAN				214.76	189.59		1	1	0	0	0	2	1	0	Oxidation (M)	14246	Extracellular glycoprotein lacritin OS=Homo sapiens OX=9606 GN=LACRT PE=1 SV=1
1164	3546	P04053|TDT_HUMAN	3130.9	2626	4111.7	4488.5	15120	12361	1	1	2	1	2	2	2	2	Acetylation (Protein N-term)	58536	DNA nucleotidylexotransferase OS=Homo sapiens OX=9606 GN=DNTT PE=1 SV=3
1647	3309	P49593|PPM1F_HUMAN				35765	26301		1	1	0	0	0	1	1	0		49831	Protein phosphatase 1F OS=Homo sapiens OX=9606 GN=PPM1F PE=1 SV=3
1623	2486	Q5T3I0|GPTC4_HUMAN				2246.8			1	1	0	0	0	2	0	0	Acetylation (Protein N-term)	50381	G patch domain-containing protein 4 OS=Homo sapiens OX=9606 GN=GPATCH4 PE=1 SV=2
1586	2140	Q9UMX0|UBQL1_HUMAN				296.5		228.28	1	1	0	0	0	1	0	1		62519	Ubiquilin-1 OS=Homo sapiens OX=9606 GN=UBQLN1 PE=1 SV=2
1586	2779	Q9UHD9|UBQL2_HUMAN				296.5		228.28	1	1	0	0	0	1	0	1		65696	Ubiquilin-2 OS=Homo sapiens OX=9606 GN=UBQLN2 PE=1 SV=2
1392	1961	O00294|TULP1_HUMAN	53959			78238		43545	1	1	1	0	0	1	0	2		60610	Tubby-related protein 1 OS=Homo sapiens OX=9606 GN=TULP1 PE=1 SV=3
1794	1906	P42262|GRIA2_HUMAN			0				1	1	0	0	1	0	0	0		98821	Glutamate receptor 2 OS=Homo sapiens OX=9606 GN=GRIA2 PE=1 SV=3
1886	1832	Q8NBP7|PCSK9_HUMAN		0					1	1	0	1	0	0	0	0	Carbamidomethylation	74286	Proprotein convertase subtilisin/kexin type 9 OS=Homo sapiens OX=9606 GN=PCSK9 PE=1 SV=3
1390	2123	O75051|PLXA2_HUMAN	22922			486270		425870	1	1	1	0	0	2	0	1	Oxidation (M)	211103	Plexin-A2 OS=Homo sapiens OX=9606 GN=PLXNA2 PE=1 SV=4
1229	1893	Q6UB98|ANR12_HUMAN			21944	915820	865740	799140	1	1	0	0	2	3	2	1	Carbamidomethylation; Oxidation (M)	235650	Ankyrin repeat domain-containing protein 12 OS=Homo sapiens OX=9606 GN=ANKRD12 PE=1 SV=3
1854	2038	Q9HBG4|VPP4_HUMAN			0				1	1	0	0	1	0	0	0		96386	V-type proton ATPase 116 kDa subunit a isoform 4 OS=Homo sapiens OX=9606 GN=ATP6V0A4 PE=1 SV=2
1855	2094	Q14DG7|T132B_HUMAN	171.97						1	1	1	0	0	0	0	0		119476	Transmembrane protein 132B OS=Homo sapiens OX=9606 GN=TMEM132B PE=2 SV=2
1468	2296	O00522|KRIT1_HUMAN	28081		17098				1	1	1	0	2	0	0	0		84348	Krev interaction trapped protein 1 OS=Homo sapiens OX=9606 GN=KRIT1 PE=1 SV=2
1527	3385	Q6MZT1|R7BP_HUMAN				4872.4	5350.5		1	1	0	0	0	2	1	0		28962	Regulator of G-protein signaling 7-binding protein OS=Homo sapiens OX=9606 GN=RGS7BP PE=2 SV=3
1585	2574	Q14246|AGRE1_HUMAN						683.89	1	1	0	0	0	0	0	2	Carbamidomethylation	97683	Adhesion G protein-coupled receptor E1 OS=Homo sapiens OX=9606 GN=ADGRE1 PE=2 SV=3
1946	2413	Q9Y5C1|ANGL3_HUMAN				400.75			1	1	0	0	0	1	0	0		53638	Angiopoietin-related protein 3 OS=Homo sapiens OX=9606 GN=ANGPTL3 PE=1 SV=1
1702	2031	Q5T1H1|EYS_HUMAN					3027.2		1	1	0	0	0	0	1	0	Carbamidomethylation; Acetylation (Protein N-term)	350797	Protein eyes shut homolog OS=Homo sapiens OX=9606 GN=EYS PE=1 SV=5
1862	2280	Q8TDR0|MIPT3_HUMAN				1391.4			1	1	0	0	0	1	0	0	Acetylation (Protein N-term)	78632	TRAF3-interacting protein 1 OS=Homo sapiens OX=9606 GN=TRAF3IP1 PE=1 SV=1
1467	2641	Q9H7N4|SFR19_HUMAN	0	0					1	1	1	2	0	0	0	0	Carbamidomethylation	139269	Splicing factor arginine/serine-rich 19 OS=Homo sapiens OX=9606 GN=SCAF1 PE=1 SV=3
1810	1973	Q9NY61|AATF_HUMAN						0	1	1	0	0	0	0	0	1	Oxidation (M)	63133	Protein AATF OS=Homo sapiens OX=9606 GN=AATF PE=1 SV=1
1963	2433	P26641|EF1G_HUMAN					212.26		1	1	0	0	0	0	1	0		50119	Elongation factor 1-gamma OS=Homo sapiens OX=9606 GN=EEF1G PE=1 SV=3
1552	1672	Q9P2D7|DYH1_HUMAN		0	633.69				1	1	0	1	1	0	0	0	Carbamidomethylation; Oxidation (M)	487482	Dynein heavy chain 1 axonemal OS=Homo sapiens OX=9606 GN=DNAH1 PE=1 SV=5
1852	1546	Q6P4A8|PLBL1_HUMAN					2159.4		1	1	0	0	0	0	1	0		63255	Phospholipase B-like 1 OS=Homo sapiens OX=9606 GN=PLBD1 PE=1 SV=2
1906	2713	Q13442|HAP28_HUMAN				1223.2			1	1	0	0	0	1	0	0		20630	28 kDa heat- and acid-stable phosphoprotein OS=Homo sapiens OX=9606 GN=PDAP1 PE=1 SV=1
1831	2039	Q8WYA0|IFT81_HUMAN			0				1	1	0	0	1	0	0	0		79746	Intraflagellar transport protein 81 homolog OS=Homo sapiens OX=9606 GN=IFT81 PE=1 SV=1
1948	2584	O15296|LX15B_HUMAN	353.99						1	1	1	0	0	0	0	0		75857	Arachidonate 15-lipoxygenase B OS=Homo sapiens OX=9606 GN=ALOX15B PE=1 SV=3
1926	2355	P20592|MX2_HUMAN				401.17			1	1	0	0	0	1	0	0	Acetylation (Protein N-term)	82089	Interferon-induced GTP-binding protein Mx2 OS=Homo sapiens OX=9606 GN=MX2 PE=1 SV=1
1455	2293	Q8IWT3|CUL9_HUMAN	0		0				1	1	1	0	2	0	0	0		281227	Cullin-9 OS=Homo sapiens OX=9606 GN=CUL9 PE=1 SV=2
1733	2702	Q96DT5|DYH11_HUMAN					868.36		1	1	0	0	0	0	1	0		520374	Dynein heavy chain 11 axonemal OS=Homo sapiens OX=9606 GN=DNAH11 PE=1 SV=4
1872	2453	Q8WZ74|CTTB2_HUMAN					8437.3		1	1	0	0	0	0	1	0		181050	Cortactin-binding protein 2 OS=Homo sapiens OX=9606 GN=CTTNBP2 PE=1 SV=1
1979	3655	Q9H299|SH3L3_HUMAN		0					1	1	0	1	0	0	0	0		10438	SH3 domain-binding glutamic acid-rich-like protein 3 OS=Homo sapiens OX=9606 GN=SH3BGRL3 PE=1 SV=1
1230	2400	Q8NDW8|TT21A_HUMAN	85658	145310	46488		102400	167110	1	1	1	2	1	0	1	3	Acetylation (Protein N-term)	150944	Tetratricopeptide repeat protein 21A OS=Homo sapiens OX=9606 GN=TTC21A PE=2 SV=3
1278	1926	Q8TE68|ES8L1_HUMAN				2134.5	3055.5	2691.1	1	1	0	0	0	1	4	2	Acetylation (Protein N-term)	80251	Epidermal growth factor receptor kinase substrate 8-like protein 1 OS=Homo sapiens OX=9606 GN=EPS8L1 PE=1 SV=3
1983	2692	Q6ZVX7|FBX50_HUMAN		0					1	1	0	1	0	0	0	0		30847	F-box only protein 50 OS=Homo sapiens OX=9606 GN=NCCRP1 PE=1 SV=1
1558	2427	Q9UJ37|SIA7B_HUMAN				28996			1	1	0	0	0	2	0	0	Carbamidomethylation; Acetylation (Protein N-term)	41939	Alpha-N-acetylgalactosaminide alpha-2 6-sialyltransferase 2 OS=Homo sapiens OX=9606 GN=ST6GALNAC2 PE=1 SV=1
1625	2547	Q96JG6|VPS50_HUMAN	1075.7		1156.2				1	1	1	0	1	0	0	0		111174	Syndetin OS=Homo sapiens OX=9606 GN=VPS50 PE=1 SV=3
1973	2697	P09543|CN37_HUMAN						0	1	1	0	0	0	0	0	1	Carbamidomethylation	47579	2' 3'-cyclic-nucleotide 3'-phosphodiesterase OS=Homo sapiens OX=9606 GN=CNP PE=1 SV=2
1589	2354	P55060|XPO2_HUMAN	543.06		323.86				1	1	1	0	1	0	0	0		110417	Exportin-2 OS=Homo sapiens OX=9606 GN=CSE1L PE=1 SV=3
1784	2290	Q4KWH8|PLCH1_HUMAN				0			1	1	0	0	0	1	0	0		189222	1-phosphatidylinositol 4 5-bisphosphate phosphodiesterase eta-1 OS=Homo sapiens OX=9606 GN=PLCH1 PE=1 SV=1
1904	2693	Q8N4N8|KIF2B_HUMAN					140.2		1	1	0	0	0	0	1	0	Carbamidomethylation; Oxidation (M)	76254	Kinesin-like protein KIF2B OS=Homo sapiens OX=9606 GN=KIF2B PE=1 SV=3
1653	3495	O95136|S1PR2_HUMAN				430.08	0		1	1	0	0	0	1	1	0	Acetylation (Protein N-term)	38867	Sphingosine 1-phosphate receptor 2 OS=Homo sapiens OX=9606 GN=S1PR2 PE=1 SV=2
1641	1882	Q08830|FGL1_HUMAN				0	0		1	1	0	0	0	1	1	0		36379	Fibrinogen-like protein 1 OS=Homo sapiens OX=9606 GN=FGL1 PE=1 SV=3
1612	2687	P19338|NUCL_HUMAN	0	0					1	1	1	1	0	0	0	0		76615	Nucleolin OS=Homo sapiens OX=9606 GN=NCL PE=1 SV=3
1736	1842	Q9ULI4|KI26A_HUMAN	7083						1	1	1	0	0	0	0	0	Acetylation (Protein N-term)	194588	Kinesin-like protein KIF26A OS=Homo sapiens OX=9606 GN=KIF26A PE=1 SV=3
1824	1936	Q96M83|CCDC7_HUMAN				882.6			1	1	0	0	0	1	0	0		157448	Coiled-coil domain-containing protein 7 OS=Homo sapiens OX=9606 GN=CCDC7 PE=2 SV=3
1953	2860	O14558|HSPB6_HUMAN			0				1	1	0	0	1	0	0	0	Acetylation (Protein N-term)	17136	Heat shock protein beta-6 OS=Homo sapiens OX=9606 GN=HSPB6 PE=1 SV=2
1598	2364	Q9UG01|IF172_HUMAN						2311.2	1	1	0	0	0	0	0	2		197575	Intraflagellar transport protein 172 homolog OS=Homo sapiens OX=9606 GN=IFT172 PE=1 SV=2
1311	2323	P20273|CD22_HUMAN	0	0	0	0			1	1	1	1	1	3	0	0	Acetylation (Protein N-term)	95348	B-cell receptor CD22 OS=Homo sapiens OX=9606 GN=CD22 PE=1 SV=2
1774	1862	P78363|ABCA4_HUMAN				2957.9			1	1	0	0	0	1	0	0	Oxidation (M)	255941	Retinal-specific phospholipid-transporting ATPase ABCA4 OS=Homo sapiens OX=9606 GN=ABCA4 PE=1 SV=3
1397	2610	Q8TD17|ZN398_HUMAN	3905.7	7281.2	4306.8			152180	1	1	1	1	1	0	0	1	Carbamidomethylation; Acetylation (Protein N-term)	71311	Zinc finger protein 398 OS=Homo sapiens OX=9606 GN=ZNF398 PE=1 SV=1
1864	2724	Q86WD7|SPA9_HUMAN			1510.3				1	1	0	0	1	0	0	0		46557	Serpin A9 OS=Homo sapiens OX=9606 GN=SERPINA9 PE=1 SV=3
1951	2795	Q9Y6F9|WNT6_HUMAN					0		1	1	0	0	0	0	1	0	Carbamidomethylation	39721	Protein Wnt-6 OS=Homo sapiens OX=9606 GN=WNT6 PE=1 SV=2
1851	1507	Q8NCH0|CHSTE_HUMAN				691.54			1	1	0	0	0	1	0	0		42997	Carbohydrate sulfotransferase 14 OS=Homo sapiens OX=9606 GN=CHST14 PE=1 SV=2
1950	2675	Q8TAD2|IL17D_HUMAN					0		1	1	0	0	0	0	1	0	Carbamidomethylation	21893	Interleukin-17D OS=Homo sapiens OX=9606 GN=IL17D PE=2 SV=1
1871	2291	P40425|PBX2_HUMAN			1958.3				1	1	0	0	1	0	0	0	Acetylation (Protein N-term)	45881	Pre-B-cell leukemia transcription factor 2 OS=Homo sapiens OX=9606 GN=PBX2 PE=1 SV=2
1445	1913	Q86V15|CASZ1_HUMAN		500400		197490			1	1	0	2	0	1	0	0		190068	Zinc finger protein castor homolog 1 OS=Homo sapiens OX=9606 GN=CASZ1 PE=1 SV=4
1800	1911	Q8IZU2|WDR17_HUMAN				296.92			1	1	0	0	0	1	0	0	Acetylation (Protein N-term)	147703	WD repeat-containing protein 17 OS=Homo sapiens OX=9606 GN=WDR17 PE=2 SV=2
1722	2528	O60885|BRD4_HUMAN					0		1	1	0	0	0	0	1	0		152218	Bromodomain-containing protein 4 OS=Homo sapiens OX=9606 GN=BRD4 PE=1 SV=2
1448	1922	Q6Q759|SPG17_HUMAN			279670			166850	1	1	0	0	2	0	0	1	Acetylation (Protein N-term)	251739	Sperm-associated antigen 17 OS=Homo sapiens OX=9606 GN=SPAG17 PE=2 SV=1
1857	2377	Q86XI8|ZSWM9_HUMAN						4189.9	1	1	0	0	0	0	0	1		70073	Uncharacterized protein ZSWIM9 OS=Homo sapiens OX=9606 GN=ZSWIM9 PE=1 SV=2
1814	1847	Q9Y3R5|DOP2_HUMAN						586.98	1	1	0	0	0	0	0	1	Acetylation (Protein N-term)	258227	Protein dopey-2 OS=Homo sapiens OX=9606 GN=DOP1B PE=1 SV=5
1572	2287	Q9C0C9|UBE2O_HUMAN					260.74		1	1	0	0	0	0	2	0		141293	(E3-independent) E2 ubiquitin-conjugating enzyme OS=Homo sapiens OX=9606 GN=UBE2O PE=1 SV=3
1484	2644	P55081|MFAP1_HUMAN				324.69	3686.3		1	1	0	0	0	1	2	0		51958	Microfibrillar-associated protein 1 OS=Homo sapiens OX=9606 GN=MFAP1 PE=1 SV=2
1870	2264	Q9UEY8|ADDG_HUMAN						312.51	1	1	0	0	0	0	0	1	Acetylation (Protein N-term)	79155	Gamma-adducin OS=Homo sapiens OX=9606 GN=ADD3 PE=1 SV=1
1994	3803	P33764|S10A3_HUMAN						0	1	1	0	0	0	0	0	1	Carbamidomethylation; Acetylation (Protein N-term)	11713	Protein S100-A3 OS=Homo sapiens OX=9606 GN=S100A3 PE=1 SV=1
1779	1878	Q13972|RGRF1_HUMAN						351.65	1	1	0	0	0	0	0	1		145233	Ras-specific guanine nucleotide-releasing factor 1 OS=Homo sapiens OX=9606 GN=RASGRF1 PE=1 SV=2
1576	1873	P06213|INSR_HUMAN				5396.7		3156.9	1	1	0	0	0	1	0	1	Carbamidomethylation; Oxidation (M); Acetylation (Protein N-term)	156332	Insulin receptor OS=Homo sapiens OX=9606 GN=INSR PE=1 SV=4
1178	2645	Q9UPQ0|LIMC1_HUMAN	15521		16417	29515	31144	22586	1	1	1	0	1	2	2	4		121867	LIM and calponin homology domains-containing protein 1 OS=Homo sapiens OX=9606 GN=LIMCH1 PE=1 SV=4
1579	2540	Q14005|IL16_HUMAN	9230.1	13317					1	1	1	1	0	0	0	0	Carbamidomethylation; Oxidation (M); Acetylation (Protein N-term)	141752	Pro-interleukin-16 OS=Homo sapiens OX=9606 GN=IL16 PE=1 SV=4
1884	3850	Q8IUN9|CLC10_HUMAN					6981.1		1	1	0	0	0	0	1	0		35446	C-type lectin domain family 10 member A OS=Homo sapiens OX=9606 GN=CLEC10A PE=2 SV=1
1966	2801	Q96QV1|HHIP_HUMAN			0				1	1	0	0	1	0	0	0	Carbamidomethylation	78851	Hedgehog-interacting protein OS=Homo sapiens OX=9606 GN=HHIP PE=1 SV=3
1570	1787	Q86WI1|PKHL1_HUMAN				3538.1		2972.6	1	1	0	0	0	1	0	1		465738	Fibrocystin-L OS=Homo sapiens OX=9606 GN=PKHD1L1 PE=2 SV=2
1785	2442	Q2M1K9|ZN423_HUMAN				10859			1	1	0	0	0	1	0	0		144605	Zinc finger protein 423 OS=Homo sapiens OX=9606 GN=ZNF423 PE=1 SV=1
1968	2920	Q96CK0|ZN653_HUMAN				0			1	1	0	0	0	1	0	0		67235	Zinc finger protein 653 OS=Homo sapiens OX=9606 GN=ZNF653 PE=1 SV=1
1867	1905	Q9UJF2|NGAP_HUMAN				191.95			1	1	0	0	0	1	0	0		128557	Ras GTPase-activating protein nGAP OS=Homo sapiens OX=9606 GN=RASAL2 PE=1 SV=2
1867	2634	Q5VWQ8|DAB2P_HUMAN				191.95			1	1	0	0	0	1	0	0		131625	Disabled homolog 2-interacting protein OS=Homo sapiens OX=9606 GN=DAB2IP PE=1 SV=2
1838	1984	Q96HA7|TONSL_HUMAN					1989.8		1	1	0	0	0	0	1	0		150928	Tonsoku-like protein OS=Homo sapiens OX=9606 GN=TONSL PE=1 SV=2
1648	3884	P10163|PRB4_HUMAN				728.37	1036.9		1	1	0	0	0	1	1	0		31326	Basic salivary proline-rich protein 4 OS=Homo sapiens OX=9606 GN=PRB4 PE=1 SV=4
1761	2565	P15918|RAG1_HUMAN		6029.6					1	1	0	1	0	0	0	0	Carbamidomethylation; Oxidation (M)	119097	V(D)J recombination-activating protein 1 OS=Homo sapiens OX=9606 GN=RAG1 PE=1 SV=2
1856	2228	Q14028|CNGB1_HUMAN	0						1	1	1	0	0	0	0	0		139677	Cyclic nucleotide-gated cation channel beta-1 OS=Homo sapiens OX=9606 GN=CNGB1 PE=1 SV=2
1577	1978	P19174|PLCG1_HUMAN				939.18	976.13		1	1	0	0	0	1	1	0		148532	1-phosphatidylinositol 4 5-bisphosphate phosphodiesterase gamma-1 OS=Homo sapiens OX=9606 GN=PLCG1 PE=1 SV=1
1679	2164	Q15413|RYR3_HUMAN		0					1	1	0	1	0	0	0	0	Oxidation (M)	552049	Ryanodine receptor 3 OS=Homo sapiens OX=9606 GN=RYR3 PE=1 SV=3
1778	1866	Q01638|ILRL1_HUMAN	18045						1	1	1	0	0	0	0	0	Acetylation (Protein N-term)	63358	Interleukin-1 receptor-like 1 OS=Homo sapiens OX=9606 GN=IL1RL1 PE=1 SV=4
1451	1774	Q9UFH2|DYH17_HUMAN			719.21	4194.4			1	1	0	0	2	1	0	0	Carbamidomethylation	509318	Dynein heavy chain 17 axonemal OS=Homo sapiens OX=9606 GN=DNAH17 PE=1 SV=3
1916	2673	P26045|PTN3_HUMAN					0		1	1	0	0	0	0	1	0		103990	Tyrosine-protein phosphatase non-receptor type 3 OS=Homo sapiens OX=9606 GN=PTPN3 PE=1 SV=2
1309	2499	Q9NRC6|SPTN5_HUMAN	204080	574070	0			199920	1	1	1	3	1	0	0	1		416753	Spectrin beta chain non-erythrocytic 5 OS=Homo sapiens OX=9606 GN=SPTBN5 PE=1 SV=2
1908	2940	Q8ND61|CC020_HUMAN			0				1	1	0	0	1	0	0	0		101266	Uncharacterized protein C3orf20 OS=Homo sapiens OX=9606 GN=C3orf20 PE=2 SV=2
1846	2282	O75069|TMCC2_HUMAN						17987	1	1	0	0	0	0	0	1		77449	Transmembrane and coiled-coil domains protein 2 OS=Homo sapiens OX=9606 GN=TMCC2 PE=1 SV=3
1898	2012	Q9BW91|NUDT9_HUMAN					67163		1	1	0	0	0	0	1	0		39125	ADP-ribose pyrophosphatase mitochondrial OS=Homo sapiens OX=9606 GN=NUDT9 PE=1 SV=1
1701	1877	Q9UMN6|KMT2B_HUMAN					0		1	1	0	0	0	0	1	0	Carbamidomethylation; Acetylation (Protein N-term)	293513	Histone-lysine N-methyltransferase 2B OS=Homo sapiens OX=9606 GN=KMT2B PE=1 SV=1
1739	2616	P28288|ABCD3_HUMAN				0			1	1	0	0	0	1	0	0	Acetylation (Protein N-term)	75476	ATP-binding cassette sub-family D member 3 OS=Homo sapiens OX=9606 GN=ABCD3 PE=1 SV=1
1674	1527	Q92736|RYR2_HUMAN					113350		1	1	0	0	0	0	1	0	Oxidation (M)	564576	Ryanodine receptor 2 OS=Homo sapiens OX=9606 GN=RYR2 PE=1 SV=3
1751	2173	Q9H992|MARH7_HUMAN		66374					1	1	0	1	0	0	0	0		78051	E3 ubiquitin-protein ligase MARCH7 OS=Homo sapiens OX=9606 GN=MARCH7 PE=1 SV=1
1882	2626	Q2M2Z5|KIZ_HUMAN			0				1	1	0	0	1	0	0	0	Carbamidomethylation	75111	Centrosomal protein kizuna OS=Homo sapiens OX=9606 GN=KIZ PE=1 SV=2
1629	2620	Q14117|DPYS_HUMAN					2717.2		1	1	0	0	0	0	2	0		56630	Dihydropyrimidinase OS=Homo sapiens OX=9606 GN=DPYS PE=1 SV=1
1464	1757	Q8IZF0|NALCN_HUMAN	0		259.61			1902.2	1	1	1	0	1	0	0	1	Carbamidomethylation	200330	Sodium leak channel non-selective protein OS=Homo sapiens OX=9606 GN=NALCN PE=1 SV=1
1459	2516	Q8IWA4|MFN1_HUMAN	60929						1	1	2	0	0	0	0	0	Acetylation (Protein N-term)	84160	Mitofusin-1 OS=Homo sapiens OX=9606 GN=MFN1 PE=1 SV=3
1477	2318	Q8WXW3|PIBF1_HUMAN				1248	1433.2	1056.6	1	1	0	0	0	1	1	1	Acetylation (Protein N-term)	89805	Progesterone-induced-blocking factor 1 OS=Homo sapiens OX=9606 GN=PIBF1 PE=1 SV=2
1762	2016	Q96JP2|MY15B_HUMAN					18601		1	1	0	0	0	0	1	0	Carbamidomethylation; Oxidation (M)	167087	Unconventional myosin-XVB OS=Homo sapiens OX=9606 GN=MYO15B PE=1 SV=3
1934	3053	Q14242|SELPL_HUMAN	0						1	1	1	0	0	0	0	0		43201	P-selectin glycoprotein ligand 1 OS=Homo sapiens OX=9606 GN=SELPLG PE=1 SV=1
1783	2223	Q7Z4N2|TRPM1_HUMAN			11930				1	1	0	0	1	0	0	0	Oxidation (M)	182178	Transient receptor potential cation channel subfamily M member 1 OS=Homo sapiens OX=9606 GN=TRPM1 PE=1 SV=2
1910	3685	Q8WYH8|ING5_HUMAN					978.15		1	1	0	0	0	0	1	0		27751	Inhibitor of growth protein 5 OS=Homo sapiens OX=9606 GN=ING5 PE=1 SV=1
1875	2826	Q9NWL6|ASND1_HUMAN				28540			1	1	0	0	0	1	0	0	Acetylation (Protein N-term)	72080	Asparagine synthetase domain-containing protein 1 OS=Homo sapiens OX=9606 GN=ASNSD1 PE=2 SV=2
1917	2722	Q9Y3B9|RRP15_HUMAN						0	1	1	0	0	0	0	0	1	Carbamidomethylation; Acetylation (Protein N-term)	31484	RRP15-like protein OS=Homo sapiens OX=9606 GN=RRP15 PE=1 SV=2
1962	2331	Q9BVC6|TM109_HUMAN					0		1	1	0	0	0	0	1	0		26210	Transmembrane protein 109 OS=Homo sapiens OX=9606 GN=TMEM109 PE=1 SV=1
1474	2524	O60306|AQR_HUMAN					2169.7	469.1	1	1	0	0	0	0	2	1		171294	RNA helicase aquarius OS=Homo sapiens OX=9606 GN=AQR PE=1 SV=4
1676	1652	P98164|LRP2_HUMAN					0		1	1	0	0	0	0	1	0	Carbamidomethylation; Oxidation (M)	521961	Low-density lipoprotein receptor-related protein 2 OS=Homo sapiens OX=9606 GN=LRP2 PE=1 SV=3
1848	2517	O60518|RNBP6_HUMAN	1131						1	1	1	0	0	0	0	0		124713	Ran-binding protein 6 OS=Homo sapiens OX=9606 GN=RANBP6 PE=1 SV=2
1848	2719	O00410|IPO5_HUMAN	1131						1	1	1	0	0	0	0	0		123630	Importin-5 OS=Homo sapiens OX=9606 GN=IPO5 PE=1 SV=4
1770	1876	Q5JSZ5|PRC2B_HUMAN				1356.7			1	1	0	0	0	1	0	0		242964	Protein PRRC2B OS=Homo sapiens OX=9606 GN=PRRC2B PE=1 SV=2
1883	2776	Q68DL7|CR063_HUMAN					1952		1	1	0	0	0	0	1	0		77231	Uncharacterized protein C18orf63 OS=Homo sapiens OX=9606 GN=C18orf63 PE=2 SV=2
1611	2570	O75366|AVIL_HUMAN	0						1	1	2	0	0	0	0	0	Oxidation (M)	92027	Advillin OS=Homo sapiens OX=9606 GN=AVIL PE=1 SV=3
1912	2086	Q9Y666|S12A7_HUMAN	0						1	1	1	0	0	0	0	0		119106	Solute carrier family 12 member 7 OS=Homo sapiens OX=9606 GN=SLC12A7 PE=1 SV=3
1869	2181	Q9BVC5|ASHWN_HUMAN					265.57		1	1	0	0	0	0	1	0		25858	Ashwin OS=Homo sapiens OX=9606 GN=C2orf49 PE=1 SV=1
1696	2374	Q8NE71|ABCF1_HUMAN		32505					1	1	0	1	0	0	0	0		95926	ATP-binding cassette sub-family F member 1 OS=Homo sapiens OX=9606 GN=ABCF1 PE=1 SV=2
1575	2579	Q2V2M9|FHOD3_HUMAN				931.71	0		1	1	0	0	0	1	1	0		158613	FH1/FH2 domain-containing protein 3 OS=Homo sapiens OX=9606 GN=FHOD3 PE=1 SV=2
1712	2046	Q86UP3|ZFHX4_HUMAN					135.56		1	1	0	0	0	0	1	0	Carbamidomethylation	393732	Zinc finger homeobox protein 4 OS=Homo sapiens OX=9606 GN=ZFHX4 PE=1 SV=1
1907	2738	Q9Y496|KIF3A_HUMAN		171.73					1	1	0	1	0	0	0	0	Carbamidomethylation	80041	Kinesin-like protein KIF3A OS=Homo sapiens OX=9606 GN=KIF3A PE=1 SV=4
1909	2944	P49662|CASP4_HUMAN					3190.3		1	1	0	0	0	0	1	0	Acetylation (Protein N-term)	43262	Caspase-4 OS=Homo sapiens OX=9606 GN=CASP4 PE=1 SV=1
1663	1494	Q15149|PLEC_HUMAN		0					1	1	0	1	0	0	0	0	Acetylation (Protein N-term)	531796	Plectin OS=Homo sapiens OX=9606 GN=PLEC PE=1 SV=3
1704	1461	Q8WXX0|DYH7_HUMAN					1085.6		1	1	0	0	0	0	1	0	Carbamidomethylation	461163	Dynein heavy chain 7 axonemal OS=Homo sapiens OX=9606 GN=DNAH7 PE=1 SV=2
1977	3052	Q96T66|NMNA3_HUMAN						134.66	1	1	0	0	0	0	0	1		28322	Nicotinamide/nicotinic acid mononucleotide adenylyltransferase 3 OS=Homo sapiens OX=9606 GN=NMNAT3 PE=1 SV=2
1728	1471	Q96N23|CFA54_HUMAN	1538.2						1	1	1	0	0	0	0	0		351970	Cilia- and flagella-associated protein 54 OS=Homo sapiens OX=9606 GN=CFAP54 PE=2 SV=3
1793	2271	Q1MSJ5|CSPP1_HUMAN	10416						1	1	1	0	0	0	0	0		145522	Centrosome and spindle pole-associated protein 1 OS=Homo sapiens OX=9606 GN=CSPP1 PE=1 SV=4
1820	2971	P36406|TRI23_HUMAN				5293			1	1	0	0	0	1	0	0		64067	E3 ubiquitin-protein ligase TRIM23 OS=Homo sapiens OX=9606 GN=TRIM23 PE=1 SV=1
1718	1455	Q8NFW1|COMA1_HUMAN					1803.1		1	1	0	0	0	0	1	0		161145	Collagen alpha-1(XXII) chain OS=Homo sapiens OX=9606 GN=COL22A1 PE=2 SV=2
1697	1643	Q63HN8|RN213_HUMAN					1175.6		1	1	0	0	0	0	1	0	Acetylation (Protein N-term)	591415	E3 ubiquitin-protein ligase RNF213 OS=Homo sapiens OX=9606 GN=RNF213 PE=1 SV=3
1873	2588	Q9NVE4|CCD87_HUMAN				0			1	1	0	0	0	1	0	0		96402	Coiled-coil domain-containing protein 87 OS=Homo sapiens OX=9606 GN=CCDC87 PE=1 SV=2
1821	3177	Q9GZN7|ROGDI_HUMAN		1529.7					1	1	0	1	0	0	0	0		32254	Protein rogdi homolog OS=Homo sapiens OX=9606 GN=ROGDI PE=1 SV=1
1918	2810	Q14126|DSG2_HUMAN						408.29	1	1	0	0	0	0	0	1		122294	Desmoglein-2 OS=Homo sapiens OX=9606 GN=DSG2 PE=1 SV=2
1765	2768	Q9Y6N5|SQOR_HUMAN						8884.5	1	1	0	0	0	0	0	1		49961	Sulfide:quinone oxidoreductase mitochondrial OS=Homo sapiens OX=9606 GN=SQOR PE=1 SV=1
1935	2063	Q5H9L4|TAF7L_HUMAN						1220.9	1	1	0	0	0	0	0	1		52588	Transcription initiation factor TFIID subunit 7-like OS=Homo sapiens OX=9606 GN=TAF7L PE=2 SV=1
1845	2156	Q01804|OTUD4_HUMAN						1377.4	1	1	0	0	0	0	0	1		124045	OTU domain-containing protein 4 OS=Homo sapiens OX=9606 GN=OTUD4 PE=1 SV=4
1699	2107	P20929|NEBU_HUMAN						2705.1	1	1	0	0	0	0	0	1	Acetylation (Protein N-term)	772931	Nebulin OS=Homo sapiens OX=9606 GN=NEB PE=1 SV=5
1720	2465	Q8IVL0|NAV3_HUMAN		11498					1	1	0	1	0	0	0	0		255646	Neuron navigator 3 OS=Homo sapiens OX=9606 GN=NAV3 PE=1 SV=3
1587	2595	Q14498|RBM39_HUMAN					16230	30406	1	1	0	0	0	0	1	1	Acetylation (Protein N-term)	59380	RNA-binding protein 39 OS=Homo sapiens OX=9606 GN=RBM39 PE=1 SV=2
1738	2443	A0A096LP49|CC187_HUMAN	5189.6						1	1	1	0	0	0	0	0	Carbamidomethylation	114856	Coiled-coil domain-containing protein 187 OS=Homo sapiens OX=9606 GN=CCDC187 PE=2 SV=1
1709	1969	O00507|USP9Y_HUMAN	8299.4						1	1	1	0	0	0	0	0	Oxidation (M)	291075	Probable ubiquitin carboxyl-terminal hydrolase FAF-Y OS=Homo sapiens OX=9606 GN=USP9Y PE=2 SV=2
1995	4131	Q6ZUL3|CH086_HUMAN				1650.8			1	1	0	0	0	1	0	0		24736	Uncharacterized protein C8orf86 OS=Homo sapiens OX=9606 GN=C8orf86 PE=2 SV=1
1971	3668	O00501|CLD5_HUMAN					0		1	1	0	0	0	0	1	0		23147	Claudin-5 OS=Homo sapiens OX=9606 GN=CLDN5 PE=2 SV=1
1930	2884	Q6ZS17|RIPR1_HUMAN				287.92			1	1	0	0	0	1	0	0		132307	Rho family-interacting cell polarization regulator 1 OS=Homo sapiens OX=9606 GN=RIPOR1 PE=1 SV=1
1839	2652	Q5VT97|SYDE2_HUMAN			1403.4				1	1	0	0	1	0	0	0	Carbamidomethylation	133230	Rho GTPase-activating protein SYDE2 OS=Homo sapiens OX=9606 GN=SYDE2 PE=1 SV=2
1837	1884	Q96JQ2|CLMN_HUMAN					0		1	1	0	0	0	0	1	0		111651	Calmin OS=Homo sapiens OX=9606 GN=CLMN PE=1 SV=1
1788	3014	P35520|CBS_HUMAN				15504			1	1	0	0	0	1	0	0	Carbamidomethylation; Acetylation (Protein N-term)	60587	Cystathionine beta-synthase OS=Homo sapiens OX=9606 GN=CBS PE=1 SV=2
1788	3015	P0DN79|CBSL_HUMAN				15504			1	1	0	0	0	1	0	0	Carbamidomethylation; Acetylation (Protein N-term)	60587	Cystathionine beta-synthase-like protein OS=Homo sapiens OX=9606 GN=CBSL PE=1 SV=1
1859	1601	O43306|ADCY6_HUMAN	0						1	1	1	0	0	0	0	0		130615	Adenylate cyclase type 6 OS=Homo sapiens OX=9606 GN=ADCY6 PE=1 SV=2
1847	2285	Q68DN1|CB016_HUMAN				0			1	1	0	0	0	1	0	0	Acetylation (Protein N-term)	224320	Uncharacterized protein C2orf16 OS=Homo sapiens OX=9606 GN=C2orf16 PE=2 SV=3
1956	2914	Q12933|TRAF2_HUMAN					1812.3		1	1	0	0	0	0	1	0		55859	TNF receptor-associated factor 2 OS=Homo sapiens OX=9606 GN=TRAF2 PE=1 SV=2
1792	2060	B1AJZ9|FHAD1_HUMAN					0		1	1	0	0	0	0	1	0		161903	Forkhead-associated domain-containing protein 1 OS=Homo sapiens OX=9606 GN=FHAD1 PE=2 SV=2
1729	1872	P42858|HD_HUMAN			2496.8				1	1	0	0	1	0	0	0	Acetylation (Protein N-term)	347603	Huntingtin OS=Homo sapiens OX=9606 GN=HTT PE=1 SV=2
1836	2816	Q8NHH1|TTL11_HUMAN					6225.4		1	1	0	0	0	0	1	0		87612	Tubulin polyglutamylase TTLL11 OS=Homo sapiens OX=9606 GN=TTLL11 PE=1 SV=2
1957	3881	Q66K66|TM198_HUMAN	2362.1						1	1	1	0	0	0	0	0		39475	Transmembrane protein 198 OS=Homo sapiens OX=9606 GN=TMEM198 PE=1 SV=1
1731	1812	Q5SYB0|FRPD1_HUMAN	0						1	1	1	0	0	0	0	0		173436	FERM and PDZ domain-containing protein 1 OS=Homo sapiens OX=9606 GN=FRMPD1 PE=1 SV=1
1866	2896	A2RUS2|DEND3_HUMAN				421.5			1	1	0	0	0	1	0	0		135890	DENN domain-containing protein 3 OS=Homo sapiens OX=9606 GN=DENND3 PE=1 SV=2
1980	3894	Q9NRW7|VPS45_HUMAN				1598.6			1	1	0	0	0	1	0	0		65077	Vacuolar protein sorting-associated protein 45 OS=Homo sapiens OX=9606 GN=VPS45 PE=1 SV=1
1958	4269	P23280|CAH6_HUMAN				2113.2			1	1	0	0	0	1	0	0		35367	Carbonic anhydrase 6 OS=Homo sapiens OX=9606 GN=CA6 PE=1 SV=3

## Sheet: peptide
Peptide	-10lgP	Mass	Length	ppm	m/z	RT	1/k0 Range	Area Sample Centrifugation1	Area Sample Centrifugation2	Area Sample Centrifugation3	Area Sample EVTRAP1	Area Sample EVTRAP2	Area Sample EVTRAP3	Fraction	Precursor Id	Source File	#Feature	#Feature Sample 1	#Feature Sample 2	#Feature Sample 3	#Feature Sample 4	#Feature Sample 5	#Feature Sample 6	Accession	PTM	AScore	Found By
ADGSYAAWLSRGSSTWLTAFVLKVLSLAQEQVGGSPEK	200	4009.06	38	4.1	1003.28	106.48	1.2033-1.2311		0		8875.5	12830	6839.6	4	212341	csf EVTRAP 1_Slot2-38_1_5937.d	3	0	0	0	1	1	1	P0C0L5|CO4B_HUMAN			PEAKS DB
ADGSYAAWLSRDSSTWLTAFVLKVLSLAQEQVGGSPEK	200	4067.06	38	-1	1017.77	106.63	1.2066-1.2344			0	6591.7	7078.8	5008.6	6	191318	csf EVTRAP 3_Slot2-38_1_5943.d	3	0	0	0	1	1	1	P0C0L4|CO4A_HUMAN			PEAKS DB
GHESC(+57.02)MGAVVSEYFVLTAAHC(+57.02)FTVDDK	164.73	3029.34	27	3.2	1010.79	100.39	1.2077-1.2355		6237.5	3946.1	100750	109600	74377	6	169719	csf EVTRAP 3_Slot2-38_1_5943.d	30	0	2	2	9	8	9	P00751|CFAB_HUMAN	Carbamidomethylation	C5:Carbamidomethylation:1000.00;C21:Carbamidomethylation:1000.00	PEAKS DB
DIDEC(+57.02)ESGIHNC(+57.02)LPDFIC(+57.02)QNTLGSFR	164.69	3096.34	26	0.5	1033.12	98.79	1.0535-1.0815	11007	16062	12404	57200	69230	75402	6	163529	csf EVTRAP 3_Slot2-38_1_5943.d	12	1	1	2	2	3	3	P23142|FBLN1_HUMAN	Carbamidomethylation	C5:Carbamidomethylation:1000.00;C12:Carbamidomethylation:1000.00;C18:Carbamidomethylation:1000.00	PEAKS DB
SYQLLVVENTVEVAQFINNNPEFLQLAEPFWK	164.2	3778.92	32	4.3	1260.65	106.09	1.2033-1.2311		1294.9	577.68	12437	0	25642	6	189806	csf EVTRAP 3_Slot2-38_1_5943.d	6	0	1	1	1	0	3	P10643|CO7_HUMAN			PEAKS DB
YC(+57.02)VQLSQIQAQISALEEQLQQIRAETEC(+57.02)QNTEYQQLLDIK	161.98	4809.36	40	4.2	1203.35	104.99	1.2155-1.2433				0	0	0	4	207141	csf EVTRAP 1_Slot2-38_1_5937.d	0	0	0	0	0	0	0	P13645|K1C10_HUMAN	Carbamidomethylation	C2:Carbamidomethylation:1000.00;C28:Carbamidomethylation:1000.00	PEAKS DB
SMQGGLVGNDETVALTAFVTIALHHGLAVFQDEGAEPLK	161.1	4035.04	39	6.5	1009.77	105.63	1.1732-1.2010	0	0	0	6196	0	19885	6	188376	csf EVTRAP 3_Slot2-38_1_5943.d	4	0	0	0	2	0	2	P0C0L5|CO4B_HUMAN:P0C0L4|CO4A_HUMAN			PEAKS DB
VIHDNFGIVEGLMTTVHAITATQK	158.4	2594.35	24	3.4	865.794	101.65	1.1642-1.1921	16610	17440	12001	22871	28606	28288	6	174882	csf EVTRAP 3_Slot2-38_1_5943.d	15	2	2	2	3	2	4	P04406|G3P_HUMAN			PEAKS DB
VFEAMNSYDLGC(+57.02)GPGGGDSALQVFQAAGLAFSDGDQWTLSRK	158	4422.03	42	4	1106.52	102.85	1.2966-1.3242	0	0		0	0	23404	6	179276	csf EVTRAP 3_Slot2-38_1_5943.d	1	0	0	0	0	0	1	P0C0L5|CO4B_HUMAN:P0C0L4|CO4A_HUMAN	Carbamidomethylation	C12:Carbamidomethylation:1000.00	PEAKS DB
LDNLQQEIDFLTALYQAELSQMQTQISETNVILSMDNNR	156.34	4526.19	39	4.2	1509.74	106.75	1.2688-1.2966		0		0	0	0	6	191566	csf EVTRAP 3_Slot2-38_1_5943.d	0	0	0	0	0	0	0	P04264|K2C1_HUMAN			PEAKS DB
DTLMISRTPEVTC(+57.02)VVVDVSHEDPEVK	155.65	2954.44	26	3.9	985.823	94.97	1.2122-1.2400		7072.3	1734.5	1717500	1456400	1032500	6	149754	csf EVTRAP 3_Slot2-38_1_5943.d	77	0	2	1	20	29	25	P0DOX5|IGG1_HUMAN	Carbamidomethylation	C13:Carbamidomethylation:1000.00	PEAKS DB
SM(+15.99)QGGLVGNDETVALTAFVTIALHHGLAVFQDEGAEPLK	155.43	4051.04	39	3.1	1013.77	105.53	1.1598-1.1877	0		0	3265.7	0	0	6	188045	csf EVTRAP 3_Slot2-38_1_5943.d	1	0	0	0	1	0	0	P0C0L5|CO4B_HUMAN:P0C0L4|CO4A_HUMAN	Oxidation (M)	M2:Oxidation (M):1000.00	PEAKS DB
EGILQYC(+57.02)QEVYPELQITNVVEANQPVTIQNWC(+57.02)K	155.29	3962.92	33	1.6	1321.98	101.55	1.2144-1.2422	33672	37570	26919	62445	64969	141070	6	174183	csf EVTRAP 3_Slot2-38_1_5943.d	69	1	1	1	19	24	23	P05067|A4_HUMAN	Carbamidomethylation	C7:Carbamidomethylation:1000.00;C32:Carbamidomethylation:1000.00	PEAKS DB
SPHWGSTYSVSVVETDYDQYALLYSQGSK	155.02	3266.5	29	2.3	1089.84	97.81	1.0871-1.1151	156330	86301	101920	405050	443400	594290	6	159616	csf EVTRAP 3_Slot2-38_1_5943.d	156	36	29	32	18	25	16	P41222|PTGDS_HUMAN			PEAKS DB
YSIYIANYAYGNVGPDALIEMDPEASDLSR	154.21	3306.54	30	1.7	1103.19	101.59	1.0916-1.1196	358.29	3336.4	1738.2	30574	27115	38135	5	194348	csf EVTRAP 2_Slot2-38_1_5942.d	15	1	1	1	5	3	4	Q9NQ79|CRAC1_HUMAN			PEAKS DB
FLC(+57.02)TPLAAAC(+57.02)PSGAQQGDAAGAAPGEREELLLLQSTAEQLR	152.95	4267.1	41	8.5	1067.79	100.04	1.2466-1.2744	0	0	0	0	0	393.11	6	168716	csf EVTRAP 3_Slot2-38_1_5943.d	1	0	0	0	0	0	1	O95502|NPTXR_HUMAN	Carbamidomethylation	C3:Carbamidomethylation:1000.00;C10:Carbamidomethylation:1000.00	PEAKS DB
TC(+57.02)QEGGSWSGTEPSC(+57.02)QDSFMYDTPQEVAEAFLSSLTETIEGVDAEDGHGPGEQQK	152.49	5978.53	55	0.8	1495.64	106.44	1.0949-1.1229			0	0	0	0	5	211881	csf EVTRAP 2_Slot2-38_1_5942.d	0	0	0	0	0	0	0	P00751|CFAB_HUMAN	Carbamidomethylation	C2:Carbamidomethylation:1000.00;C15:Carbamidomethylation:1000.00	PEAKS DB
LTESYC(+57.02)ETWRTEAPSATGQASSLLGGR	152.25	2927.37	27	2.1	976.8	81.82	1.0254-1.0535		46.389		15822	11548	15769	6	120723	csf EVTRAP 3_Slot2-38_1_5943.d	4	0	1	0	1	1	1	P39060|COIA1_HUMAN	Carbamidomethylation	C6:Carbamidomethylation:1000.00	PEAKS DB
FGFC(+57.02)PMAAHEEIC(+57.02)TTNEGVMYR	151.38	2619.1	22	-0.8	874.04	86.93	0.9804-1.0085	20863	20642	15343	242570	259070	208100	6	131614	csf EVTRAP 3_Slot2-38_1_5943.d	26	4	3	2	4	8	5	P02751|FINC_HUMAN	Carbamidomethylation	C4:Carbamidomethylation:1000.00;C13:Carbamidomethylation:1000.00	PEAKS DB
HMAGAAAAGAVVGGLGGYMLGSAMSRPIIHFGSDYEDR	151.08	3791.8	38	1.6	948.958	99.28	1.1531-1.1810	11051	9428	6104.1	3688.5	0	3199.2	2	122650	csf 20k centrifugation 2_Slot2-37_1_5939.d	13	4	3	2	2	0	2	P04156|PRIO_HUMAN			PEAKS DB
SSATPGVGTPFSYAVPGQANELVLIEWGNNPMEILINDK	150.41	4128.05	39	3.1	1377.03	105.22	1.1955-1.2233	0	0	0	0	2958.4	11196	6	186954	csf EVTRAP 3_Slot2-38_1_5943.d	2	0	0	0	0	1	1	Q15818|NPTX1_HUMAN			PEAKS DB
MGPTVSPIC(+57.02)LPGTSSDYNLMDGDLGLISGWGR	150.3	3365.57	32	1.8	1122.87	103.5	1.1095-1.1374	3671.4	1423.5	657.35	23287	17611	20540	5	201986	csf EVTRAP 2_Slot2-38_1_5942.d	11	2	1	1	2	3	2	P09871|C1S_HUMAN	Carbamidomethylation	C9:Carbamidomethylation:1000.00	PEAKS DB
NPREDYLDVYVFGVGPLVNQVNINALASK	149.78	3203.66	29	-0.4	1068.89	102.02	1.0815-1.1095		775.62	633.18	61086	50945	51938	6	175986	csf EVTRAP 3_Slot2-38_1_5943.d	10	0	1	1	3	2	3	P00751|CFAB_HUMAN			PEAKS DB
EIETYHNLLEGGQEDFESSGAGK	149.34	2509.12	23	3.9	837.385	77.16	0.9443-0.9725	51606	70668	51589	200740	188700	166610	6	110973	csf EVTRAP 3_Slot2-38_1_5943.d	39	3	3	4	13	6	10	P35527|K1C9_HUMAN			PEAKS DB
SNLDEDIIAEENIVSRSEFPESWLWNVEDLK	149.32	3675.76	31	1.6	1226.26	103.34	1.1441-1.1721		2450.7	435.56	58533	49672	43590	4	201568	csf EVTRAP 1_Slot2-38_1_5937.d	6	0	1	2	1	1	1	P01024|CO3_HUMAN			PEAKS DB
QC(+57.02)VPTEPC(+57.02)EDAEDDC(+57.02)GNDFQC(+57.02)STGR	149.17	2946.08	25	2.7	983.037	57.43	1.0018-1.0299	302.49	2274.5	970.58	35903	33055	54277	6	72443	csf EVTRAP 3_Slot2-38_1_5943.d	13	1	1	2	3	4	2	P02748|CO9_HUMAN	Carbamidomethylation	C2:Carbamidomethylation:1000.00;C8:Carbamidomethylation:1000.00;C15:Carbamidomethylation:1000.00;C21:Carbamidomethylation:1000.00	PEAKS DB
KTDELPQLVTLPHPNLHGPEILDVPSTVQK	148.84	3314.79	30	1.8	829.706	97.02	1.0243-1.0524	3043.6	9345.5	3398.8	47532	35229	30553	6	156360	csf EVTRAP 3_Slot2-38_1_5943.d	11	1	2	1	2	2	3	P02751|FINC_HUMAN			PEAKS DB
QYVEGSSIPVPTHYYSIITSC(+57.02)LDFTQPADK	147.73	3415.63	30	2	1139.55	99.68	1.1061-1.1341	5403.7	6926.3	4427.1	43188	40224	67011	6	166885	csf EVTRAP 3_Slot2-38_1_5943.d	15	1	1	1	3	5	4	Q13822|ENPP2_HUMAN	Carbamidomethylation	C21:Carbamidomethylation:1000.00	PEAKS DB
C(+57.02)SYTEDAQC(+57.02)IDGTIEVPK	146.64	2084.9	18	1.9	1043.46	74.98	1.1843-1.2122	31314	41385	31918	634430	630360	576850	6	106739	csf EVTRAP 3_Slot2-38_1_5943.d	47	3	3	3	11	14	13	P02749|APOH_HUMAN	Carbamidomethylation	C1:Carbamidomethylation:1000.00;C9:Carbamidomethylation:1000.00	PEAKS DB
SSSDTC(+57.02)GPC(+57.02)EPASC(+57.02)PPLPPLGC(+57.02)LLGETR	145.69	3014.32	28	-0.5	1005.78	100.11	1.0277-1.0557	19110	21279	14918	92452	75587	190250	6	168802	csf EVTRAP 3_Slot2-38_1_5943.d	19	2	2	2	5	5	3	Q16270|IBP7_HUMAN	Carbamidomethylation	C6:Carbamidomethylation:1000.00;C9:Carbamidomethylation:1000.00;C14:Carbamidomethylation:1000.00;C22:Carbamidomethylation:1000.00	PEAKS DB
PGMPFDLMVFVTNPDGSPAYRVPVAVQGEDTVQSLTQGDGVAK	145.13	4489.19	43	0.3	1123.31	102.98	1.2600-1.2877	0	0	0	0	0	0	5	200058	csf EVTRAP 2_Slot2-38_1_5942.d	0	0	0	0	0	0	0	P01024|CO3_HUMAN			PEAKS DB
TAGYGINILGMDPLSTPFDNEFYNGLC(+57.02)NR	144.88	3248.49	29	-0.8	1083.84	103.8	1.0546-1.0826	5095.3	2970.5	1920.9	50267	47751	52397	6	182667	csf EVTRAP 3_Slot2-38_1_5943.d	9	1	1	1	2	2	2	P02748|CO9_HUMAN	Carbamidomethylation	C27:Carbamidomethylation:1000.00	PEAKS DB
ALAAVLLQALDRPASPPAPSGSQQGPEEEAAEALLTETVR	144.67	4053.1	40	3.5	1014.29	102.49	1.1073-1.1352	32550	34892	23404	0		0	2	132341	csf 20k centrifugation 2_Slot2-37_1_5939.d	10	3	4	3	0	0	0	O15240|VGF_HUMAN			PEAKS DB
DTWVEHWPEEDEC(+57.02)QDEENQK	144.48	2602.02	20	2.4	868.349	72.15	0.9274-0.9556		3839.6	1091.2	78742	94474	95175	5	112906	csf EVTRAP 2_Slot2-38_1_5942.d	30	0	2	2	5	11	10	P01024|CO3_HUMAN	Carbamidomethylation	C13:Carbamidomethylation:1000.00	PEAKS DB
LNQVC(+57.02)DEEWHHYVLNVEFPSVTLYVDGTSHEPFSVTEDYPLHPSK	144.11	5313.47	45	5.7	1063.71	99.23	1.2099-1.2377				3500.8	2150.4	0	5	184979	csf EVTRAP 2_Slot2-38_1_5942.d	2	0	0	0	1	1	0	O94985|CSTN1_HUMAN	Carbamidomethylation	C5:Carbamidomethylation:1000.00	PEAKS DB
SC(+57.02)RPNDVTC(+57.02)VFDPVHTISHTVISLPTFR	143.87	3254.6	28	2.4	814.658	98.41	1.0265-1.0546	9235.2	17814	6329.6	26230	35542	22346	6	162305	csf EVTRAP 3_Slot2-38_1_5943.d	11	2	2	1	2	2	2	P23142|FBLN1_HUMAN	Carbamidomethylation	C2:Carbamidomethylation:1000.00;C9:Carbamidomethylation:1000.00	PEAKS DB
ASAGLLGAHAAAITAYALTLTK	143.74	2084.16	22	-0.5	1043.09	99.34	1.3320-1.3596	40410	47115	40392	59677	82415	70763	5	185148	csf EVTRAP 2_Slot2-38_1_5942.d	19	3	3	3	3	4	3	P0C0L5|CO4B_HUMAN:P0C0L4|CO4A_HUMAN			PEAKS DB
THTC(+57.02)PPC(+57.02)PAPELLGGPSVFLFPPKPK	143.64	2843.45	26	2.4	948.826	97.87	1.2010-1.2288	4432.5	3868.5	2499.7	56754	70730	45075	5	179270	csf EVTRAP 2_Slot2-38_1_5942.d	11	2	2	1	2	2	2	P0DOX5|IGG1_HUMAN	Carbamidomethylation	C4:Carbamidomethylation:1000.00;C7:Carbamidomethylation:1000.00	PEAKS DB
SLEYLDLSFNQIARLPSGLPVSLLTLYLDNNK	143.63	3605.93	32	3.9	1202.99	105.57	1.1698-1.1977		0		2597.8	2695.3	0	6	188188	csf EVTRAP 3_Slot2-38_1_5943.d	2	0	0	0	1	1	0	P51884|LUM_HUMAN			PEAKS DB
GGASEHITTLAYQELPTADLMQEWGDAVQYNPAIIK	143.47	3929.91	36	1.8	1310.98	101.59	1.1765-1.2044	3544.6	3010.1	2292.5	24848	30427	22746	5	194452	csf EVTRAP 2_Slot2-38_1_5942.d	6	1	1	1	1	1	1	P07358|CO8B_HUMAN			PEAKS DB
FFTSHNGMQFSTWDNDNDKFEGNC(+57.02)AEQDGSGWWMNK	143.39	4286.72	36	2.7	1072.69	96.17	0.9613-0.9894				0	0	0	5	172573	csf EVTRAP 2_Slot2-38_1_5942.d	0	0	0	0	0	0	0	P02679|FIBG_HUMAN	Carbamidomethylation	C24:Carbamidomethylation:1000.00	PEAKS DB
TSESGELHGLTTEEEFVEGIYK	143.23	2454.14	22	0.6	819.056	94.89	0.9646-0.9928	899380	1267300	827610	108280	75555	73846	3	93711	csf 20k centrifugation 3_Slot2-37_1_5940.d	80	22	24	23	5	4	2	P02766|TTHY_HUMAN			PEAKS DB
LLLFSPSVVHLGVPLSVGVQLQDVPR	142.83	2768.6	26	0.6	923.873	102.56	1.0378-1.0658	47215	40610	24650	112660	109900	139620	6	178157	csf EVTRAP 3_Slot2-38_1_5943.d	19	3	3	2	3	4	4	P0C0L5|CO4B_HUMAN:P0C0L4|CO4A_HUMAN			PEAKS DB
ETTRPFSNEC(+57.02)LGTTRPVVPIDSSDFALDIR	142.83	3392.67	30	4.1	849.178	97.16	1.1028-1.1307	5512.4	4460.1	6077.3	9290.9	6228.7	12882	6	157081	csf EVTRAP 3_Slot2-38_1_5943.d	12	2	2	1	2	2	3	P19021|AMD_HUMAN	Carbamidomethylation	C10:Carbamidomethylation:1000.00	PEAKS DB
FSVATQTC(+57.02)QITPAEGPVVTAQYDC(+57.02)LGC(+57.02)VHPISTQSPDLEPILR	142.44	4755.3	43	-0.9	1189.83	98.84	1.2355-1.2633	0	0	0	0		0	6	163919	csf EVTRAP 3_Slot2-38_1_5943.d	0	0	0	0	0	0	0	P01042|KNG1_HUMAN	Carbamidomethylation	C8:Carbamidomethylation:1000.00;C24:Carbamidomethylation:1000.00;C27:Carbamidomethylation:1000.00	PEAKS DB
HQEAQEAC(+57.02)SSQGLILHGSGMLLPC(+57.02)GSDRFR	142.31	3340.55	30	2.5	836.147	80.61	1.0636-1.0916	23642	31906	26848	100100	88321	84414	6	117899	csf EVTRAP 3_Slot2-38_1_5943.d	13	2	2	2	2	2	3	P51693|APLP1_HUMAN	Carbamidomethylation	C8:Carbamidomethylation:1000.00;C24:Carbamidomethylation:1000.00	PEAKS DB
C(+57.02)KPVNTFVHEPLVDVQNVC(+57.02)FQEK	142.17	2786.35	23	-1.3	929.79	82.73	1.0164-1.0445	2723.3	6140.2	3688.5	741110	715840	678330	6	122516	csf EVTRAP 3_Slot2-38_1_5943.d	25	2	4	2	7	5	5	P07998|RNAS1_HUMAN	Carbamidomethylation	C1:Carbamidomethylation:1000.00;C19:Carbamidomethylation:1000.00	PEAKS DB
VSATVSSPGSVPEVQDIQQNTDGSGQVSIPIIIPQTISELQLSVSAGSPHPAIAR	142.14	5561.89	55	3.3	1391.48	103.07	1.4037-1.4313	2539	0	1405.4	0	0	3986.9	6	180133	csf EVTRAP 3_Slot2-38_1_5943.d	3	1	0	1	0	0	1	P0C0L5|CO4B_HUMAN:P0C0L4|CO4A_HUMAN			PEAKS DB
GYQLSDVDGVTC(+57.02)EDIDEC(+57.02)ALPTGGHIC(+57.02)SYR	142.08	3386.45	30	3.6	1129.83	89.36	1.0893-1.1173	29716	40891	27714	74001	62396	265900	6	136941	csf EVTRAP 3_Slot2-38_1_5943.d	26	1	3	1	9	6	6	P23142|FBLN1_HUMAN	Carbamidomethylation	C12:Carbamidomethylation:1000.00;C18:Carbamidomethylation:1000.00;C27:Carbamidomethylation:1000.00	PEAKS DB
YFKPGMPFDLMVFVTNPDGSPAYRVPVAVQGEDTVQSLTQGDGVAK	142.03	4927.42	46	4	1232.87	102.03	1.0714-1.0994	0			0	0	0	6	176392	csf EVTRAP 3_Slot2-38_1_5943.d	0	0	0	0	0	0	0	P01024|CO3_HUMAN			PEAKS DB
HLDSVLQQLQTEVYRGAQTLYVPNC(+57.02)DHR	141.91	3339.64	28	2.5	835.92	99.16	1.0580-1.0860		440.14		61285	91848	44456	5	184613	csf EVTRAP 2_Slot2-38_1_5942.d	9	0	1	0	4	2	2	P24592|IBP6_HUMAN	Carbamidomethylation	C25:Carbamidomethylation:1000.00	PEAKS DB
FHLGEPEASTQFMTQNYQDSPTLQAPR	141.89	3092.43	27	3.9	1031.82	87.48	1.0568-1.0849	359.75	1138.3	372.12	60132	81613	46081	4	149778	csf EVTRAP 1_Slot2-38_1_5937.d	11	1	1	1	4	2	2	Q96S96|PEBP4_HUMAN			PEAKS DB
NLNHFETYEAC(+57.02)MLAC(+57.02)MSGPLAAC(+57.02)SLPALQGPC(+57.02)K	141.62	3710.65	33	3.5	1237.89	100.4	1.1374-1.1654	0	2062.7	1923.4	0	13670	14797	6	169963	csf EVTRAP 3_Slot2-38_1_5943.d	4	0	1	1	0	1	1	Q8TEU8|WFKN2_HUMAN	Carbamidomethylation	C11:Carbamidomethylation:1000.00;C15:Carbamidomethylation:1000.00;C23:Carbamidomethylation:1000.00;C32:Carbamidomethylation:1000.00	PEAKS DB
LQETSNWLLSQQQADGSFQDLSPVIHR	141.61	3096.53	27	0	1033.18	97.7	1.0669-1.0949	36064	40829	24040	99999	113210	148910	5	178591	csf EVTRAP 2_Slot2-38_1_5942.d	17	2	3	2	4	3	3	P0C0L5|CO4B_HUMAN			PEAKS DB
RC(+57.02)PGC(+57.02)GQGVQAGC(+57.02)PGGC(+57.02)VEEEDGGSPAEGC(+57.02)AEAEGC(+57.02)LRR	141.51	4135.67	39	4.2	1034.93	53.31	1.1095-1.1374	0	0	0	2146.6	46000	3200.8	5	76539	csf EVTRAP 2_Slot2-38_1_5942.d	4	0	0	0	1	2	1	P24592|IBP6_HUMAN	Carbamidomethylation	C2:Carbamidomethylation:1000.00;C5:Carbamidomethylation:1000.00;C13:Carbamidomethylation:1000.00;C17:Carbamidomethylation:1000.00;C30:Carbamidomethylation:1000.00;C36:Carbamidomethylation:1000.00	PEAKS DB
C(+57.02)QHEMDQYWGIGSLASGINLFTNSFEGPVLDHR	140.94	3777.73	33	-4.1	945.436	102.74	1.1307-1.1587		0		3511.6	3835.4	1649.4	5	199113	csf EVTRAP 2_Slot2-38_1_5942.d	3	0	0	0	1	1	1	P07358|CO8B_HUMAN	Carbamidomethylation	C1:Carbamidomethylation:1000.00	PEAKS DB
RGYQLSDVDGVTC(+57.02)EDIDEC(+57.02)ALPTGGHIC(+57.02)SYR	140.04	3542.55	31	1.2	886.646	83.38	1.0467-1.0748	19496	4142.6	15427	196510	175240	175890	6	123986	csf EVTRAP 3_Slot2-38_1_5943.d	23	2	1	1	5	5	9	P23142|FBLN1_HUMAN	Carbamidomethylation	C13:Carbamidomethylation:1000.00;C19:Carbamidomethylation:1000.00;C28:Carbamidomethylation:1000.00	PEAKS DB
SVAVYGQYGGQPC(+57.02)VGNAFETQSC(+57.02)EPTR	140.04	2961.3	27	-0.5	988.107	77.5	1.0355-1.0636	649.08	1426.8		35456	29895	31947	5	127299	csf EVTRAP 2_Slot2-38_1_5942.d	10	1	1	0	3	3	2	P10643|CO7_HUMAN	Carbamidomethylation	C13:Carbamidomethylation:1000.00;C23:Carbamidomethylation:1000.00	PEAKS DB
SHC(+57.02)IAEVENDEM(+15.99)PADLPSLAADFVESK	139.99	2989.33	27	-0.3	997.451	98.58	1.0501-1.0781	183830	254110	217420	41507	6312.2	39521	2	119682	csf 20k centrifugation 2_Slot2-37_1_5939.d	32	7	6	8	3	3	5	P02768|ALBU_HUMAN	Carbamidomethylation; Oxidation (M)	C3:Carbamidomethylation:1000.00;M12:Oxidation (M):1000.00	PEAKS DB
SHC(+57.02)IAEVENDEMPADLPSLAADFVESK	139.81	2973.34	27	1.8	992.121	99.85	1.0535-1.0815	629400	368150	581440	381510	372720	470390	2	124576	csf 20k centrifugation 2_Slot2-37_1_5939.d	60	11	8	9	14	10	8	P02768|ALBU_HUMAN	Carbamidomethylation	C3:Carbamidomethylation:1000.00	PEAKS DB
LAHVSEPSTC(+57.02)VYALTFETPLVC(+57.02)HPHALLVYPTLPEALQR	139.75	4429.26	39	3.2	1108.33	99.8	1.1575-1.1854	1601.5	1411	1115.5	0	0	3271.8	6	167787	csf EVTRAP 3_Slot2-38_1_5943.d	4	1	1	1	0	0	1	Q9UJJ9|GNPTG_HUMAN	Carbamidomethylation	C10:Carbamidomethylation:1000.00;C22:Carbamidomethylation:1000.00	PEAKS DB
LVRPEVDVMC(+57.02)TAFHDNEETFLK	139.36	2649.26	22	-1.2	884.092	93.34	1.1196-1.1475	3762900	3528000	3440700	1167700	1040300	1077000	2	104796	csf 20k centrifugation 2_Slot2-37_1_5939.d	88	22	21	18	9	12	6	P02768|ALBU_HUMAN	Carbamidomethylation	C10:Carbamidomethylation:1000.00	PEAKS DB
TAGPDQTEMTIEGLQPTVEYVVSVYAQNPSGESQPLVQTAVTNIDRPK	139.14	5157.54	48	4.1	1290.4	102.14	1.3231-1.3508	0	0	0	0	0	0	5	196800	csf EVTRAP 2_Slot2-38_1_5942.d	0	0	0	0	0	0	0	P02751|FINC_HUMAN			PEAKS DB
NWRDPDQTDGLGLSYLSSHIANVERVPFDAATLHTSTAMAAQHGMDDDGTGQK	139.11	5696.63	53	4.9	1140.34	97.87	1.2799-1.3076	25715	45522	21285	272460	137800	152670	6	159960	csf EVTRAP 3_Slot2-38_1_5943.d	13	1	1	1	4	3	3	P06396|GELS_HUMAN			PEAKS DB
LLLFSPSVVHLGVPLSVGVQLQDVPRGQVVK	139.09	3279.91	31	2.8	1094.31	100.92	1.3651-1.3927	2343.1	2446.4	1619.5	31245	67958	45516	5	191657	csf EVTRAP 2_Slot2-38_1_5942.d	10	1	2	2	1	2	2	P0C0L5|CO4B_HUMAN:P0C0L4|CO4A_HUMAN			PEAKS DB
YGTISPEEGVSYLENLDEM(+15.99)IALQTK	138.53	2815.35	25	3.3	939.46	102.13	1.1285-1.1564	2895.5	3127.9	1858	45144	41735	35051	6	176657	csf EVTRAP 3_Slot2-38_1_5943.d	10	1	2	1	2	2	2	Q8WXD2|SCG3_HUMAN	Oxidation (M)	M19:Oxidation (M):1000.00	PEAKS DB
QDSLSSQNQLGVLPLSWDIPELVNMGQWK	138.53	3281.64	29	-1.7	1094.88	105.27	1.0669-1.0949	11770	8048.5	6495	48512	36871	53519	5	207856	csf EVTRAP 2_Slot2-38_1_5942.d	9	1	1	1	2	2	2	P01024|CO3_HUMAN			PEAKS DB
SSTSPTTNVLLSPLSVATALSALSLGAEQRTESIIHR	138.45	3807.04	37	2.2	952.769	105.13	1.1508-1.1787			0	25634	34151	31226	6	186634	csf EVTRAP 3_Slot2-38_1_5943.d	8	0	0	0	3	3	2	P36955|PEDF_HUMAN			PEAKS DB
NVSTGDVNVEMNAAPGVDLTQLLNNMR	138.28	2871.39	27	-0.8	958.135	102.04	1.0389-1.0669	25197	41547	34492	57464	71138	57190	2	131038	csf 20k centrifugation 2_Slot2-37_1_5939.d	18	3	3	3	3	3	3	P13645|K1C10_HUMAN			PEAKS DB
ATEVPVSWESFNNGDC(+57.02)FILDLGNNIHQWC(+57.02)GSNSNRYER	138.18	4484.99	38	-1.5	1122.25	100.28	1.1754-1.2033		0	0	771.36	0	0	6	169622	csf EVTRAP 3_Slot2-38_1_5943.d	1	0	0	0	1	0	0	P06396|GELS_HUMAN	Carbamidomethylation	C16:Carbamidomethylation:1000.00;C29:Carbamidomethylation:1000.00	PEAKS DB
VHTEC(+57.02)C(+57.02)HGDLLEC(+57.02)ADDRADLAK	138.08	2584.11	22	2.2	647.036	52.93	0.9421-0.9703	2997700	3232000	2573700	766310	818750	792500	2	41137	csf 20k centrifugation 2_Slot2-37_1_5939.d	193	45	52	40	19	20	17	P02768|ALBU_HUMAN	Carbamidomethylation	C5:Carbamidomethylation:1000.00;C6:Carbamidomethylation:1000.00;C13:Carbamidomethylation:1000.00	PEAKS DB
FGGFGGPGGVGGLGGPGGFGPGGYPGGIHEVSVNQSLLQPLNVK	137.97	4091.07	44	3.1	1023.78	100.1	1.1542-1.1821	19105	16280	11050	8965.6	7606.5	9616.4	2	125467	csf 20k centrifugation 2_Slot2-37_1_5939.d	6	1	1	1	1	1	1	P35908|K22E_HUMAN			PEAKS DB
TGLDSPTGIDFSDITANSFTVHWIAPR	137.77	2917.42	27	2.8	973.485	101.12	1.1575-1.1854	6266.3	7822.8	7370.5	40778	41202	41702	5	192234	csf EVTRAP 2_Slot2-38_1_5942.d	19	2	2	2	4	4	5	P02751|FINC_HUMAN			PEAKS DB
FSSC(+57.02)GGGGGSFGAGGGFGSR	137.75	1764.73	20	1	883.372	58.38	1.0658-1.0938	37215	2567.4	36340	170070	172980	125490	5	84888	csf EVTRAP 2_Slot2-38_1_5942.d	62	8	5	5	16	18	10	P04264|K2C1_HUMAN	Carbamidomethylation	C4:Carbamidomethylation:1000.00	PEAKS DB
EYLIMGLDGATYDLEGHPQYLLDSNSWIEEMPSER	137.32	4070.86	35	0.8	1357.96	101.92	1.1709-1.1988	0	0		19706	26308	11576	6	175907	csf EVTRAP 3_Slot2-38_1_5943.d	8	0	0	0	4	2	2	P0C0L5|CO4B_HUMAN:P0C0L4|CO4A_HUMAN			PEAKS DB
VHVSEEGTEPEAMLQVLGPKPALPAGTEDTAK	137.13	3300.65	32	1.3	826.172	92.17	1.0265-1.0546	8904.6	12502	6282.9	108390	90623	64754	5	161964	csf EVTRAP 2_Slot2-38_1_5942.d	25	4	4	3	5	6	3	P06396|GELS_HUMAN			PEAKS DB
EDAGEYEC(+57.02)HASNSQGQASASAK	137	2295.93	22	2.3	766.319	26.58	0.9093-0.9376	11832	13192	7604.5	357330	327010	273240	6	24458	csf EVTRAP 3_Slot2-38_1_5943.d	44	2	2	1	12	12	15	Q16270|IBP7_HUMAN	Carbamidomethylation	C8:Carbamidomethylation:1000.00	PEAKS DB
YGFC(+57.02)PHEALFTMGGNAEGQPC(+57.02)K	136.93	2470.05	22	1.8	824.359	81.91	0.9725-1.0007	1692.5	2262.7	1593	52745	50422	45124	6	121002	csf EVTRAP 3_Slot2-38_1_5943.d	11	1	1	1	3	3	2	P08253|MMP2_HUMAN	Carbamidomethylation	C4:Carbamidomethylation:1000.00;C21:Carbamidomethylation:1000.00	PEAKS DB
KVETNMAFSPFSIASLLTQVLLGAGENTK	136.76	3065.61	29	7.3	1022.88	106.78	1.2455-1.2733	6108.4	6589.1	3068.9	67103	74855	82560	6	191618	csf EVTRAP 3_Slot2-38_1_5943.d	11	1	1	1	3	2	3	P05155|IC1_HUMAN			PEAKS DB
AGFEWNEDGAGTTPSPGLQPAHLTFPLDYHLNQPF	136.73	3823.79	35	-0.8	1275.6	101	1.1587-1.1865	0	495.69		58536	69256	66370	5	191988	csf EVTRAP 2_Slot2-38_1_5942.d	7	0	1	0	2	3	1	P36955|PEDF_HUMAN			PEAKS DB
LC(+57.02)ADQEC(+57.02)SHPISMAVALQDYMAPDC(+57.02)R	136.64	3037.29	26	1.1	1013.44	96.86	1.0423-1.0703	466.51	597.28	458.26	8847.7	13766	15630	6	155852	csf EVTRAP 3_Slot2-38_1_5943.d	9	1	1	1	2	2	2	Q16674|MIA_HUMAN	Carbamidomethylation	C2:Carbamidomethylation:1000.00;C7:Carbamidomethylation:1000.00;C25:Carbamidomethylation:1000.00	PEAKS DB
SC(+57.02)GLHQLLRGPEVQLVAHSPWLK	136.64	2624.4	23	1.1	657.108	92.33	0.9477-0.9759	3974.4	10105	3132.9	116700	83235	66941	5	162386	csf EVTRAP 2_Slot2-38_1_5942.d	17	1	4	1	5	3	3	P0C0L5|CO4B_HUMAN:P0C0L4|CO4A_HUMAN	Carbamidomethylation	C2:Carbamidomethylation:1000.00	PEAKS DB
TPEVTC(+57.02)VVVDVSHEDPEVK	136.63	2138.02	19	2.8	1070.02	78.18	1.3110-1.3386	285820	339090	296190	2209700	5240900	3950300	6	112931	csf EVTRAP 3_Slot2-38_1_5943.d	170	2	4	2	48	53	61	P0DOX5|IGG1_HUMAN	Carbamidomethylation	C6:Carbamidomethylation:1000.00	PEAKS DB
IQC(+57.02)AAGYEQSEHNVC(+57.02)QDIDEC(+57.02)TAGTHNC(+57.02)R	136.51	3422.38	29	0.5	856.602	57.91	1.0344-1.0624	62581	90965	57292	8742.6	13396	8140.9	3	42257	csf 20k centrifugation 3_Slot2-37_1_5940.d	18	5	2	3	3	2	3	Q12805|FBLN3_HUMAN	Carbamidomethylation	C3:Carbamidomethylation:1000.00;C15:Carbamidomethylation:1000.00;C21:Carbamidomethylation:1000.00;C28:Carbamidomethylation:1000.00	PEAKS DB
AGFEWNEDGAGTTPSPGLQPAHLTFPLDYHLNQPFIF	136.5	4083.94	37	3.1	1362.33	103.19	1.1899-1.2177			0	129850	106960	120040	6	180462	csf EVTRAP 3_Slot2-38_1_5943.d	3	0	0	0	1	1	1	P36955|PEDF_HUMAN			PEAKS DB
VDNALQSGNSQESVTEQDSK	136.28	2134.96	20	0.8	1068.49	38.99	1.1988-1.2266	156140	162450	135000	2633500	2921500	2381800	6	42584	csf EVTRAP 3_Slot2-38_1_5943.d	185	6	3	5	58	50	63	P0DOX7|IGK_HUMAN:P01834|IGKC_HUMAN			PEAKS DB
GSSGGGC(+57.02)FGGSSGGYGGLGGFGGGSFR	136.15	2341.98	27	-1.4	1171.99	83.97	1.2488-1.2766	25437	31053	25994	21684	31182	35322	6	125224	csf EVTRAP 3_Slot2-38_1_5943.d	13	2	2	2	2	4	1	P13645|K1C10_HUMAN	Carbamidomethylation	C7:Carbamidomethylation:1000.00	PEAKS DB
ADSQAQLLLSTVVGVFTAPGLHLK	135.69	2464.37	24	1	822.464	105.31	0.9917-1.0198	68175	53205	53874	2437.1	2346.4	1562	2	138126	csf 20k centrifugation 2_Slot2-37_1_5939.d	14	3	3	3	2	2	1	P01019|ANGT_HUMAN			PEAKS DB
GIGEWHC(+57.02)QPLQTYPSSSGPVEVFITETPSQPNSHPIQWNAPQPSHISK	135.6	5349.56	48	4.5	1070.92	96.82	1.1497-1.1776	0	0	0		3023.4	2930.3	6	155780	csf EVTRAP 3_Slot2-38_1_5943.d	2	0	0	0	0	1	1	P02751|FINC_HUMAN	Carbamidomethylation	C7:Carbamidomethylation:1000.00	PEAKS DB
LLRGTVIDVTDFVNWASSINDAPVLISQK	135.44	3170.7	29	-3.3	1057.9	103.74	1.0994-1.1274	2766	1850.5	660.22	33127	30716	21844	5	202877	csf EVTRAP 2_Slot2-38_1_5942.d	10	1	1	1	2	3	2	P02748|CO9_HUMAN			PEAKS DB
TSNPYRVPANLENVGFEVQTAEDDLK	135.33	2905.41	26	-6.1	969.471	97.44	1.0557-1.0837	472.78	742.44	577.34	11155	16718	10128	5	177554	csf EVTRAP 2_Slot2-38_1_5942.d	7	1	1	1	1	2	1	P13671|CO6_HUMAN			PEAKS DB
GNFLAANDQELDC(+57.02)DILQLEYVGGISMLIVVPHK	135.19	3670.84	33	-1.9	1224.62	105.46	1.3331-1.3607		1694.5	1203	6559.7	6192.1	6522.1	5	208668	csf EVTRAP 2_Slot2-38_1_5942.d	5	0	1	1	1	1	1	P05546|HEP2_HUMAN	Carbamidomethylation	C13:Carbamidomethylation:1000.00	PEAKS DB
LLRDPADASEAHESSSRGEAGAPGEEDIQGPTK	135.03	3376.58	33	3.8	845.155	47.52	0.9815-1.0097	33566	26274	21478	237620	224580	130290	5	64445	csf EVTRAP 2_Slot2-38_1_5942.d	23	3	3	3	4	6	4	P05060|SCG1_HUMAN			PEAKS DB
VTTVASHTSDSDVPSGVTEVVVK	134.92	2313.17	23	1.8	1157.59	65.2	1.3209-1.3486	1733900	1825800	1706000	1568400	1509300	1531900	5	100595	csf EVTRAP 2_Slot2-38_1_5942.d	102	10	10	8	26	23	25	P10909|CLUS_HUMAN			PEAKS DB
VPFDAATLHTSTAMAAQHGMDDDGTGQK	134.8	2872.28	28	2	958.434	69.07	1.1430-1.1709	63519	72635	51365	137750	135000	115880	5	109449	csf EVTRAP 2_Slot2-38_1_5942.d	20	3	2	5	5	3	2	P06396|GELS_HUMAN			PEAKS DB
TNTFRPTMPEEVTRPNYPGIMYLQSDFDLGC(+57.02)TC(+57.02)DDKVEPK	134.45	4721.15	40	9	945.247	97.33	1.1363-1.1642				10161	15648	41593	6	157500	csf EVTRAP 3_Slot2-38_1_5943.d	3	0	0	0	1	1	1	Q13822|ENPP2_HUMAN	Carbamidomethylation	C31:Carbamidomethylation:1000.00;C33:Carbamidomethylation:1000.00	PEAKS DB
GFYPSDIAVEWESNGQPENNYK	134.41	2543.12	22	-1.7	848.714	96.69	0.9421-0.9703	50043	56664	58381	129130	131780	223900	6	155016	csf EVTRAP 3_Slot2-38_1_5943.d	29	2	2	2	7	8	8	P0DOX5|IGG1_HUMAN:P01861|IGHG4_HUMAN			PEAKS DB
DMENLEDVFYQMIDESQSLSLC(+57.02)GMVWEHRK	134.38	3688.63	30	5.5	923.17	105.21	1.0669-1.0949		3113	1581.6	12881	15534	7238.7	5	207655	csf EVTRAP 2_Slot2-38_1_5942.d	7	0	1	1	2	2	1	P00751|CFAB_HUMAN	Carbamidomethylation	C22:Carbamidomethylation:1000.00	PEAKS DB
DYFPEPVTVSWNSGALTSGVHTFPAVLQSSGLYSLSSVVTVPSSSLGTQTYIC(+57.02)NVNHKPSNTK	134.33	6712.31	63	2.4	1343.47	101.95	1.3585-1.3861				26430	0	41224	6	175822	csf EVTRAP 3_Slot2-38_1_5943.d	4	0	0	0	3	0	1	P0DOX5|IGG1_HUMAN	Carbamidomethylation	C53:Carbamidomethylation:1000.00	PEAKS DB
ISQAC(+57.02)ELHVAGFDFEVLNEGFLVHK	134.31	2858.41	25	4.2	953.813	99.91	1.1587-1.1865	20884	15620	15050	3612.8	1454.6	3145.3	3	108865	csf 20k centrifugation 3_Slot2-37_1_5940.d	14	3	3	3	2	1	2	O43505|B4GA1_HUMAN	Carbamidomethylation	C5:Carbamidomethylation:1000.00	PEAKS DB
QHMDSDSSPSSSSTYC(+57.02)NQMMR	134.19	2434.92	21	2	812.65	43.85	0.9082-0.9364	4280.6	3745.7	3640.1	597430	628830	472390	6	49679	csf EVTRAP 3_Slot2-38_1_5943.d	40	1	1	1	13	15	9	P07998|RNAS1_HUMAN	Carbamidomethylation	C16:Carbamidomethylation:1000.00	PEAKS DB
HWC(+57.02)EEGASSSSC(+57.02)SETYC(+57.02)GLYPESEPEVK	134.08	3264.3	28	2.3	1089.11	69.01	1.0411-1.0692		0		19659	23333	14675	6	94615	csf EVTRAP 3_Slot2-38_1_5943.d	4	0	0	0	1	1	2	Q96IY4|CBPB2_HUMAN	Carbamidomethylation	C3:Carbamidomethylation:1000.00;C12:Carbamidomethylation:1000.00;C17:Carbamidomethylation:1000.00	PEAKS DB
GSQTQSHPDLGTEGC(+57.02)WDQLSAPR	133.75	2526.12	23	-0.3	843.047	70.36	0.9443-0.9725	5736.8	7058.1	3459.1	1896.5	2178.4	872.03	2	65035	csf 20k centrifugation 2_Slot2-37_1_5939.d	7	2	1	1	1	1	1	Q96PD5|PGRP2_HUMAN	Carbamidomethylation	C15:Carbamidomethylation:1000.00	PEAKS DB
VREEVVTVGNSVNEGLNQPTDDSC(+57.02)FDPYTVSHYAVGDEWERMSESGFK	133.64	5435.43	48	8.8	1088.1	97.27	1.1665-1.1943					0	0	6	157488	csf EVTRAP 3_Slot2-38_1_5943.d	0	0	0	0	0	0	0	P02751|FINC_HUMAN	Carbamidomethylation	C24:Carbamidomethylation:1000.00	PEAKS DB
YYGGGYGSTQATFMVFQALAQYQK	133.63	2678.25	24	-1.1	1340.13	102.3	1.3541-1.3817	10078	8021.8	7064.8	28920	29737	27895	6	177284	csf EVTRAP 3_Slot2-38_1_5943.d	12	2	2	2	2	2	2	P01024|CO3_HUMAN			PEAKS DB
EC(+57.02)VGFEAVQEVPVGLVQPASATLYDYYNPERR	133.51	3655.76	32	7.5	1219.6	100.15	1.2010-1.2288	35057	29268	26298	51860	56695	137420	6	168965	csf EVTRAP 3_Slot2-38_1_5943.d	15	3	2	2	3	2	3	P0C0L5|CO4B_HUMAN:P0C0L4|CO4A_HUMAN	Carbamidomethylation	C2:Carbamidomethylation:1000.00	PEAKS DB
YRGDQDATMSILDISMMTGFAPDTDDLK	133.48	3106.39	28	1.6	1036.47	101.92	1.0770-1.1050	6119.2	10168	8394	121430	121050	122280	5	195395	csf EVTRAP 2_Slot2-38_1_5942.d	60	3	2	3	15	22	15	P01024|CO3_HUMAN			PEAKS DB
FVTVQATFGTQVVEKVVLVSLQSGYLFIQTDKTIYTPGSTVLYRIFTVNHK	133.43	5735.1	51	-0.4	1148.03	106.06	1.3331-1.3607			0	2563.2	0	0	5	210780	csf EVTRAP 2_Slot2-38_1_5942.d	1	0	0	0	1	0	0	P01024|CO3_HUMAN			PEAKS DB
VLTGNPRLDLQEINNWVQAQMK	133.35	2566.33	22	-0.7	856.451	100.61	0.9950-1.0232				67674	78344	47329	6	170838	csf EVTRAP 3_Slot2-38_1_5943.d	6	0	0	0	3	2	1	P36955|PEDF_HUMAN			PEAKS DB
DSSC(+57.02)GTGYELTEDNSC(+57.02)K	133.33	1921.73	17	0.7	961.873	45.29	1.1173-1.1453	29875	29816	26401	496000	8235.6	348560	6	51485	csf EVTRAP 3_Slot2-38_1_5943.d	26	1	1	1	11	6	6	P23142|FBLN1_HUMAN	Carbamidomethylation	C4:Carbamidomethylation:1000.00;C16:Carbamidomethylation:1000.00	PEAKS DB
FGSYC(+57.02)PTTC(+57.02)GIADFLSTYQTK	133.31	2416.07	21	0.5	1209.04	99.65	1.2988-1.3265	80271	76460	55945	41608	20557	65732	6	167047	csf EVTRAP 3_Slot2-38_1_5943.d	11	2	2	2	2	1	2	P02679|FIBG_HUMAN	Carbamidomethylation	C5:Carbamidomethylation:1000.00;C9:Carbamidomethylation:1000.00	PEAKS DB
VRSSTSPTTNVLLSPLSVATALSALSLGAEQR	133.22	3225.76	32	0.8	1076.26	104.83	1.3121-1.3397				32433	33253	22214	4	206603	csf EVTRAP 1_Slot2-38_1_5937.d	12	0	0	0	4	4	4	P36955|PEDF_HUMAN			PEAKS DB
QGQIIYNWQGAQSTQDEVAASAILTAQLDEELGGTPVQSR	132.99	4272.09	40	-2.5	1425.03	102.02	1.4972-1.5246	1871.2	18716	0	40874	44388	117790	6	176130	csf EVTRAP 3_Slot2-38_1_5943.d	56	1	4	0	14	13	24	P06396|GELS_HUMAN			PEAKS DB
TFYSC(+57.02)TTEGRQDGHLWC(+57.02)STTSNYEQDQK	132.98	3398.42	28	3.9	850.616	61.73	1.0602-1.0882	3479.5	4239.1	2992.9	203490	205120	140020	6	80583	csf EVTRAP 3_Slot2-38_1_5943.d	20	1	1	1	6	6	5	P02751|FINC_HUMAN	Carbamidomethylation	C5:Carbamidomethylation:1000.00;C17:Carbamidomethylation:1000.00	PEAKS DB
RHQEAQEAC(+57.02)SSQGLILHGSGMLLPC(+57.02)GSDR	132.97	3193.48	29	2.9	799.38	72.81	0.9973-1.0254	23655	29767	25122	43046	45592	44576	6	101970	csf EVTRAP 3_Slot2-38_1_5943.d	24	3	4	5	3	5	4	P51693|APLP1_HUMAN	Carbamidomethylation	C9:Carbamidomethylation:1000.00;C25:Carbamidomethylation:1000.00	PEAKS DB
NPSDPMPQAPALWIETTAYALLHLLLHEGK	132.78	3325.72	30	-0.5	832.436	107.31	1.0613-1.0893	0			35034	28128	12953	6	192607	csf EVTRAP 3_Slot2-38_1_5943.d	9	0	0	0	3	3	3	P0C0L5|CO4B_HUMAN:P0C0L4|CO4A_HUMAN			PEAKS DB
LQSGTHC(+57.02)LWTDQLLQGSEK	132.69	2200.06	19	1.3	734.361	78.57	0.8935-0.9218	9733.2	12769	10882	54215	40258	41596	5	129636	csf EVTRAP 2_Slot2-38_1_5942.d	16	2	3	2	3	3	3	P01033|TIMP1_HUMAN	Carbamidomethylation	C7:Carbamidomethylation:1000.00	PEAKS DB
C(+57.02)SPHLVLSALTSDNHGATYAFSGTHYWR	132.31	3147.46	28	1.5	787.874	88.85	1.0232-1.0512	1988.9	2499.2		3597.8	3269.6	1247.9	5	153150	csf EVTRAP 2_Slot2-38_1_5942.d	10	2	3	0	2	2	1	P02790|HEMO_HUMAN	Carbamidomethylation	C1:Carbamidomethylation:1000.00	PEAKS DB
FGFC(+57.02)PM(+15.99)AAHEEIC(+57.02)TTNEGVMYR	132.31	2635.1	22	1.6	879.374	79.82	0.9703-0.9984	2754.3	3443.8	2316	20993	17654	17299	6	116213	csf EVTRAP 3_Slot2-38_1_5943.d	6	1	1	1	1	1	1	P02751|FINC_HUMAN	Carbamidomethylation; Oxidation (M)	C4:Carbamidomethylation:1000.00;M6:Oxidation (M):280.03;C13:Carbamidomethylation:1000.00	PEAKS DB
TPGAVNAC(+57.02)HLSC(+57.02)SALLQDNIADAVAC(+57.02)AK	132.11	2926.37	28	3.3	976.468	92.65	1.2288-1.2566	2138.5	2987.6	1705.8	229360	218490	155290	4	163406	csf EVTRAP 1_Slot2-38_1_5937.d	18	2	2	2	3	5	4	P61626|LYSC_HUMAN	Carbamidomethylation	C8:Carbamidomethylation:1000.00;C12:Carbamidomethylation:1000.00;C26:Carbamidomethylation:1000.00	PEAKS DB
VLMSVLNDNSRDMTEVISSLENANYK	132.1	2941.42	26	1.3	981.481	100.22	1.2099-1.2377	500.83	0	0	14653	14905	10414	6	169339	csf EVTRAP 3_Slot2-38_1_5943.d	6	1	0	0	2	2	1	P06681|CO2_HUMAN			PEAKS DB
GNEFFC(+57.02)YDLSHNPIQSSTDEITLAFR	132.1	3060.39	26	-0.1	1021.14	100.36	1.0636-1.0916	1031.7	704.93	556.14	5797	4936	5375.6	5	189557	csf EVTRAP 2_Slot2-38_1_5942.d	6	1	1	1	1	1	1	Q9P2S2|NRX2A_HUMAN	Carbamidomethylation	C6:Carbamidomethylation:1000.00	PEAKS DB
GGSGGSYGGGGSGGGYGGGSGSR	131.98	1790.72	23	2.2	896.369	23.03	1.0389-1.0669	21599	18186	14047	62966	59914	37920	6	19278	csf EVTRAP 3_Slot2-38_1_5943.d	11	1	1	1	1	5	2	P35527|K1C9_HUMAN			PEAKS DB
EVVTSEDGSDC(+57.02)PEAMDLGTLSGIGTLDGFR	131.79	3127.4	30	-0.4	1043.47	100.64	1.0378-1.0658	51423	54944	42383	8681.5	2781.3	17021	3	111019	csf 20k centrifugation 3_Slot2-37_1_5940.d	29	6	5	7	3	3	5	P02671|FIBA_HUMAN	Carbamidomethylation	C11:Carbamidomethylation:1000.00	PEAKS DB
VVAVNNIGRGPPSEPVLTQTSEQAPSSAPR	131.76	3057.58	30	2.4	1020.2	70.93	1.0658-1.0938	461.24	623.26	211.71	6059.4	5036.6	12325	6	98400	csf EVTRAP 3_Slot2-38_1_5943.d	7	1	1	1	1	1	2	P23468|PTPRD_HUMAN			PEAKS DB
TEIDKPSQMQVTDVQDNSISVK	131.74	2461.2	22	2.7	821.41	65.86	0.9522-0.9804	15972	24433	14969	209450	125210	159870	6	88434	csf EVTRAP 3_Slot2-38_1_5943.d	59	4	5	3	19	14	14	P02751|FINC_HUMAN			PEAKS DB
FGFC(+57.02)PMAAHEEIC(+57.02)TTNEGVM(+15.99)YR	131.7	2635.1	22	1.9	879.374	81.03	0.9703-0.9984	1842.2	2045.9	1150.7	19660	19968	19183	6	118855	csf EVTRAP 3_Slot2-38_1_5943.d	7	1	1	1	2	1	1	P02751|FINC_HUMAN	Carbamidomethylation; Oxidation (M)	C4:Carbamidomethylation:1000.00;C13:Carbamidomethylation:1000.00;M20:Oxidation (M):277.62	PEAKS DB
HMAGAAAAGAVVGGLGGYMLGSAMSRPIIHF	131.57	2969.48	31	2.5	990.837	100.67	1.3076-1.3353	3816.4	2544.3	3352.8	13410	17045	11179	5	190738	csf EVTRAP 2_Slot2-38_1_5942.d	13	2	2	3	2	2	2	P04156|PRIO_HUMAN			PEAKS DB
IEENRIAPLAWINQENLESIDLSYNK	131.54	3071.56	26	-0.3	1024.86	99.88	1.0580-1.0860				1466.7	1297	2260	6	168012	csf EVTRAP 3_Slot2-38_1_5943.d	5	0	0	0	2	2	1	O94769|ECM2_HUMAN			PEAKS DB
KGVSYLLMGQVEENRGPVLPPESFVVLHRPNQDQILTNLSK	131.45	4601.44	41	2.1	921.298	97.67	1.0972-1.1252	0	0		6146.8	3212.6	1999.6	5	178503	csf EVTRAP 2_Slot2-38_1_5942.d	3	0	0	0	1	1	1	Q15113|PCOC1_HUMAN			PEAKS DB
DRQLAGAMVWALDLDDFQGSFC(+57.02)GQDLR	131.4	3083.42	27	-0.2	1028.81	102.54	1.0647-1.0927				8781.5	6550	7322.1	6	177930	csf EVTRAP 3_Slot2-38_1_5943.d	4	0	0	0	1	2	1	P36222|CH3L1_HUMAN	Carbamidomethylation	C22:Carbamidomethylation:1000.00	PEAKS DB
KVETNM(+15.99)AFSPFSIASLLTQVLLGAGENTK	131.4	3081.61	29	3.9	1028.21	106.53	1.1106-1.1386	1550.7	0	0	18998	15189	6916.1	6	191030	csf EVTRAP 3_Slot2-38_1_5943.d	4	1	0	0	1	1	1	P05155|IC1_HUMAN	Oxidation (M)	M6:Oxidation (M):1000.00	PEAKS DB
FQDDPDGLHQLDGTPLTAEDIVHK	131.22	2660.27	24	6.6	887.77	83.13	1.1162-1.1441	68971	104400	77184	266590	236550	224510	5	139923	csf EVTRAP 2_Slot2-38_1_5942.d	48	7	8	9	9	8	7	Q8WXD2|SCG3_HUMAN			PEAKS DB
DHNC(+57.02)HNLPEGVADLTQIDVNVQDHFWDGK	131.06	3372.52	29	-0.2	844.138	97.94	1.0355-1.0636	53205	65365	37629	691.79	641.75	577.1	3	102130	csf 20k centrifugation 3_Slot2-37_1_5940.d	13	3	4	3	1	1	1	O75711|SCRG1_HUMAN	Carbamidomethylation	C4:Carbamidomethylation:1000.00	PEAKS DB
SSTSPTTNVLLSPLSVATALSALSLGAEQR	130.92	2970.59	30	0.7	991.204	105.88	1.1988-1.2266	15487	12499	9494.1	63576	38023	117970	6	189178	csf EVTRAP 3_Slot2-38_1_5943.d	21	3	3	3	5	3	4	P36955|PEDF_HUMAN			PEAKS DB
YPGPQAEGDSEGLSQGLVDREK	130.88	2331.1	22	0.8	778.04	62.63	1.0130-1.0411	41526	51204	37962	256.22	590.04	459.72	2	54079	csf 20k centrifugation 2_Slot2-37_1_5939.d	6	1	1	1	1	1	1	P10645|CMGA_HUMAN			PEAKS DB
KC(+57.02)PDYTC(+57.02)PITFSSPADITILLDGSASVGSHNFDTTK	130.87	3914.83	36	4.3	979.72	99.95	1.1888-1.2166	0	0	0	7227.5	9899.4	3760	5	187825	csf EVTRAP 2_Slot2-38_1_5942.d	3	0	0	0	1	1	1	P12109|CO6A1_HUMAN	Carbamidomethylation	C2:Carbamidomethylation:1000.00;C7:Carbamidomethylation:1000.00	PEAKS DB
TMSGLEC(+57.02)QAWDSQSPHAHGYIPSK	130.64	2686.19	24	1.2	896.405	64.93	1.0220-1.0501	14204	16549	12361	42068	47292	45781	5	100480	csf EVTRAP 2_Slot2-38_1_5942.d	15	2	3	2	3	3	2	P00747|PLMN_HUMAN	Carbamidomethylation	C7:Carbamidomethylation:1000.00	PEAKS DB
DIENQYETQITQIEHEVSSSGQEVQSSAK	130.47	3263.51	29	1.5	1088.84	97.91	1.0916-1.1196	22631	45989	22510	11674	14821	37208	6	160036	csf EVTRAP 3_Slot2-38_1_5943.d	9	1	2	1	2	1	2	P35527|K1C9_HUMAN			PEAKS DB
GGGGGGYGSGGSSYGSGGGSYGSGGGGGGGR	130.44	2382.94	31	-0.4	1192.48	33.75	1.1821-1.2099	30940	25733	23245	92428	66957	93512	6	35286	csf EVTRAP 3_Slot2-38_1_5943.d	15	2	2	2	2	3	4	P04264|K2C1_HUMAN			PEAKS DB
MGPTVSPIC(+57.02)LPGTSSDYNLM(+15.99)DGDLGLISGWGR	130.39	3381.57	32	8.4	1128.21	102.13	1.1017-1.1296	211.7		0	2801.6	0	1709.6	4	196971	csf EVTRAP 1_Slot2-38_1_5937.d	3	1	0	0	1	0	1	P09871|C1S_HUMAN	Carbamidomethylation; Oxidation (M)	C9:Carbamidomethylation:1000.00;M20:Oxidation (M):207.60	PEAKS DB
ATFGC(+57.02)HDGYSLDGPEEIEC(+57.02)TK	130.31	2384.99	21	2.3	796.005	68.82	0.9025-0.9308	73449	84535	50179	1199000	1229100	1001300	2	63075	csf 20k centrifugation 2_Slot2-37_1_5939.d	37	4	4	3	11	8	7	P02749|APOH_HUMAN	Carbamidomethylation	C5:Carbamidomethylation:1000.00;C19:Carbamidomethylation:1000.00	PEAKS DB
THTC(+57.02)PPC(+57.02)PAPELLGGPSVFLFPPK	130.3	2618.3	24	-1.2	873.774	99.76	0.9782-1.0063	126220	129890	107170	676370	586190	969240	6	167468	csf EVTRAP 3_Slot2-38_1_5943.d	37	3	3	3	7	12	9	P0DOX5|IGG1_HUMAN	Carbamidomethylation	C4:Carbamidomethylation:1000.00;C7:Carbamidomethylation:1000.00	PEAKS DB
MPC(+57.02)AEDYLSVVLNQLC(+57.02)VLHEK	130.27	2517.21	21	3.9	840.079	103.47	1.0692-1.0972	67926	57248	37021	17791	15413	11934	2	134685	csf 20k centrifugation 2_Slot2-37_1_5939.d	15	3	3	2	3	2	2	P02768|ALBU_HUMAN	Carbamidomethylation	C3:Carbamidomethylation:1000.00;C16:Carbamidomethylation:1000.00	PEAKS DB
ITRC(+57.02)PMIPC(+57.02)YISSPDEC(+57.02)LWMDWVTEK	130.23	3286.46	26	0.1	1096.49	101.09	1.0871-1.1151				19239	22318	16861	6	172791	csf EVTRAP 3_Slot2-38_1_5943.d	3	0	0	0	1	1	1	P16035|TIMP2_HUMAN	Carbamidomethylation	C4:Carbamidomethylation:1000.00;C9:Carbamidomethylation:1000.00;C17:Carbamidomethylation:1000.00	PEAKS DB
VTASDPLDTLGSEGALSPGGVASLLR	130.23	2482.29	26	1.2	1242.15	101.47	1.3607-1.3883	71131	75536	64965	182360	191930	154050	5	193997	csf EVTRAP 2_Slot2-38_1_5942.d	16	2	3	3	3	3	2	P0C0L5|CO4B_HUMAN:P0C0L4|CO4A_HUMAN			PEAKS DB
NVVYTC(+57.02)NEGYSLIGNPVAR	130.09	2125.03	19	7.9	1063.53	84.03	1.2010-1.2288	7769.5	9998.5	8368.4	57701	77327	116080	5	142125	csf EVTRAP 2_Slot2-38_1_5942.d	19	2	3	2	3	4	5	P10643|CO7_HUMAN	Carbamidomethylation	C6:Carbamidomethylation:1000.00	PEAKS DB
KLSENTDFLAPGVSSFTDSNQQESITK	130.06	2942.41	27	-0.1	981.812	85.47	1.0434-1.0714	34337	39834	33407			1973	2	89994	csf 20k centrifugation 2_Slot2-37_1_5939.d	4	1	1	1	0	0	1	Q14515|SPRL1_HUMAN			PEAKS DB
PVNTFVHEPLVDVQNVC(+57.02)FQEK	129.81	2498.23	21	1.2	833.75	90.62	0.9635-0.9917	3852.3	6299.5	4699.9	284500	320460	303930	6	140105	csf EVTRAP 3_Slot2-38_1_5943.d	27	1	1	1	8	9	7	P07998|RNAS1_HUMAN	Carbamidomethylation	C17:Carbamidomethylation:1000.00	PEAKS DB
TPSAAYLWVGTGASEAEK	129.77	1836.89	18	3.2	919.455	82.97	1.1575-1.1854	206790	183000	155470	778380	758200	744130	6	122979	csf EVTRAP 3_Slot2-38_1_5943.d	71	4	4	6	21	16	20	P06396|GELS_HUMAN			PEAKS DB
VFEAM(+15.99)NSYDLGC(+57.02)GPGGGDSALQVFQAAGLAFSDGDQWTLSRK	129.64	4438.03	42	3.3	1110.52	102.27	1.3065-1.3342			0	0	0	0	6	177285	csf EVTRAP 3_Slot2-38_1_5943.d	0	0	0	0	0	0	0	P0C0L5|CO4B_HUMAN:P0C0L4|CO4A_HUMAN	Oxidation (M); Carbamidomethylation	M5:Oxidation (M):1000.00;C12:Carbamidomethylation:1000.00	PEAKS DB
HGSGSGHSSSYGQHGSGSGWSSSSGR	129.61	2476.01	26	-1.4	620.01	17.1	0.8856-0.9138	4214.7	3066	1072.7	11391	11264	7902.7	5	13256	csf EVTRAP 2_Slot2-38_1_5942.d	10	2	2	1	2	2	1	Q86YZ3|HORN_HUMAN			PEAKS DB
LIADAWNAIPDNLDAVVDLQGGGHSYFFK	129.52	3145.55	29	1.6	1049.53	102.13	1.2744-1.3021	1203.7	2238.4	1095.7	55619	53464	37267	6	176582	csf EVTRAP 3_Slot2-38_1_5943.d	12	1	1	1	3	3	3	P08253|MMP2_HUMAN			PEAKS DB
RMPC(+57.02)AEDYLSVVLNQLC(+57.02)VLHEK	129.36	2673.31	22	-2.3	669.333	101.99	0.9545-0.9827	1095500	991260	463130	499210	474090	370230	2	130868	csf 20k centrifugation 2_Slot2-37_1_5939.d	70	18	20	13	5	7	7	P02768|ALBU_HUMAN	Carbamidomethylation	C4:Carbamidomethylation:1000.00;C17:Carbamidomethylation:1000.00	PEAKS DB
EDYLDVYVFGVGPLVNQVNINALASK	129.33	2836.46	26	-0.8	946.495	104.09	1.0624-1.0905		0		18051	20252	14938	5	204013	csf EVTRAP 2_Slot2-38_1_5942.d	9	0	0	0	3	3	3	P00751|CFAB_HUMAN			PEAKS DB
LLATLC(+57.02)SAEVC(+57.02)QC(+57.02)AEGK	129.3	1908.87	17	2.4	955.447	70.93	1.1263-1.1542	38017	42770	34759	271210	245280	241910	6	98114	csf EVTRAP 3_Slot2-38_1_5943.d	17	2	1	2	4	5	3	P0C0L5|CO4B_HUMAN:P0C0L4|CO4A_HUMAN	Carbamidomethylation	C6:Carbamidomethylation:1000.00;C11:Carbamidomethylation:1000.00;C13:Carbamidomethylation:1000.00	PEAKS DB
VTVSC(+57.02)SGGMSLEGPSAFLC(+57.02)GSSLK	129.27	2430.12	24	3.3	1216.07	97.69	1.2999-1.3276		443.82	2003.1	31239	29791	87089	6	158674	csf EVTRAP 3_Slot2-38_1_5943.d	9	0	1	1	2	3	2	P10643|CO7_HUMAN	Carbamidomethylation	C5:Carbamidomethylation:1000.00;C19:Carbamidomethylation:1000.00	PEAKS DB
EVVSLTEAC(+57.02)C(+57.02)AEGADPDC(+57.02)YDTR	129.24	2517.01	22	2.8	840.013	71.78	1.0040-1.0321	28551	44617	29001	1591.9	2106.9	1435.1	2	66887	csf 20k centrifugation 2_Slot2-37_1_5939.d	11	3	3	2	1	1	1	P02774|VTDB_HUMAN	Carbamidomethylation	C9:Carbamidomethylation:1000.00;C10:Carbamidomethylation:1000.00;C18:Carbamidomethylation:1000.00	PEAKS DB
TSHPYQAALYTSGHLLC(+57.02)GGVLIHPLWVLTAAHC(+57.02)K	129.2	3770.92	34	0.9	755.192	98.91	1.0142-1.0423				2762.3	3964.2	3144.7	5	183693	csf EVTRAP 2_Slot2-38_1_5942.d	3	0	0	0	1	1	1	Q92876|KLK6_HUMAN	Carbamidomethylation	C17:Carbamidomethylation:1000.00;C33:Carbamidomethylation:1000.00	PEAKS DB
SRWQQGNVFSC(+57.02)SVMHEALHNHYTQK	129.14	3043.39	25	5.4	761.86	68.49	0.9703-0.9984	105800	111740	89110	581870	602570	476950	6	93618	csf EVTRAP 3_Slot2-38_1_5943.d	48	2	3	3	13	13	14	P0DOX5|IGG1_HUMAN:P01859|IGHG2_HUMAN	Carbamidomethylation	C11:Carbamidomethylation:1000.00	PEAKS DB
ADGESC(+57.02)SASMMYQEGK	128.97	1749.66	16	2.5	875.842	44.15	1.0344-1.0624	3626.3	3253.6	2880	34172	41754	20823	5	57702	csf EVTRAP 2_Slot2-38_1_5942.d	10	1	1	1	1	4	2	P01008|ANT3_HUMAN	Carbamidomethylation	C6:Carbamidomethylation:1000.00	PEAKS DB
VETNMAFSPFSIASLLTQVLLGAGENTK	128.96	2937.52	28	0.5	980.18	107.72	1.1709-1.1988	287.13	0		15212	13815	10551	5	214611	csf EVTRAP 2_Slot2-38_1_5942.d	7	1	0	0	2	2	2	P05155|IC1_HUMAN			PEAKS DB
PGPALSYPQEEATLNEMFREVEELMEDTQHK	128.85	3617.67	31	1.5	905.425	105.11	1.0647-1.0927	0	0	0	0			1	133759	csf 20k centrifugation 1_Slot2-37_1_5935.d	0	0	0	0	0	0	0	Q9UBP4|DKK3_HUMAN			PEAKS DB
FPGAVDGATYILVMVDPDAPSRAEPR	128.83	2743.36	26	2.9	915.465	100.77	1.1117-1.1397	239.08	1633.3	0	57423	69175	58688	5	191063	csf EVTRAP 2_Slot2-38_1_5942.d	13	1	1	0	3	4	4	Q96S96|PEBP4_HUMAN			PEAKS DB
FSPATHPSEGLEENYC(+57.02)RNPDNDPQGPWC(+57.02)YTTDPEK	128.76	4107.73	35	2.2	1027.94	73.91	0.9308-0.9590	0	0	0	0	0	0	4	117771	csf EVTRAP 1_Slot2-38_1_5937.d	0	0	0	0	0	0	0	P00747|PLMN_HUMAN	Carbamidomethylation	C16:Carbamidomethylation:1000.00;C28:Carbamidomethylation:1000.00	PEAKS DB
SFTLASSETGVGAPISGPGIPGR	128.75	2157.11	23	5	1079.57	90.84	1.2344-1.2622	711.9	1375.8	419.9	107720	118130	133810	6	140744	csf EVTRAP 3_Slot2-38_1_5943.d	13	1	2	1	3	3	3	P36222|CH3L1_HUMAN			PEAKS DB
IHDGEADIMINFGRWEHGDGYPFDGK	128.72	2975.33	26	-2.2	744.838	96.46	0.9793-1.0074				13752	16180	8685.1	6	154159	csf EVTRAP 3_Slot2-38_1_5943.d	7	0	0	0	3	3	1	P08253|MMP2_HUMAN			PEAKS DB
C(+57.02)DC(+57.02)IC(+57.02)PVGSQGLAC(+57.02)EVSYRK	128.61	2358.02	20	1.7	787.016	66.4	1.0063-1.0344	1339.3	1493.4	1234.2	34048	35235	28106	6	89829	csf EVTRAP 3_Slot2-38_1_5943.d	10	1	1	1	2	3	2	P07358|CO8B_HUMAN	Carbamidomethylation	C1:Carbamidomethylation:1000.00;C3:Carbamidomethylation:1000.00;C5:Carbamidomethylation:1000.00;C14:Carbamidomethylation:1000.00	PEAKS DB
GGGAGFISGLSYLELDNPAGNK	128.53	2136.05	22	1.3	1069.03	99.56	1.2355-1.2633	6203.5	8307.4	5551.3	29392	24598	20302	5	186012	csf EVTRAP 2_Slot2-38_1_5942.d	13	3	3	2	2	2	1	P10643|CO7_HUMAN			PEAKS DB
ILDDLSPRDQFNLIVFSTEATQWRPSLVPASAENVNK	128.39	4170.14	37	-0.1	1043.54	101.62	1.2433-1.2711	0			0	0	0	4	194981	csf EVTRAP 1_Slot2-38_1_5937.d	0	0	0	0	0	0	0	Q14624|ITIH4_HUMAN			PEAKS DB
DSC(+57.02)QGDSGGPLVC(+57.02)NQSLQGIISWGQDPC(+57.02)AITR	128.37	3475.56	32	2	1159.53	100.12	1.1005-1.1285						1809.2	6	169020	csf EVTRAP 3_Slot2-38_1_5943.d	1	0	0	0	0	0	1	Q9UBX7|KLK11_HUMAN	Carbamidomethylation	C3:Carbamidomethylation:1000.00;C13:Carbamidomethylation:1000.00;C28:Carbamidomethylation:1000.00	PEAKS DB
VTNPDGSPAYRVPVAVQGEDTVQSLTQGDGVAK	128.29	3354.67	33	1.2	1119.23	87.86	1.0961-1.1240	4469	9528.9	9114.6	97600	87810	60351	6	133695	csf EVTRAP 3_Slot2-38_1_5943.d	17	1	3	2	4	3	4	P01024|CO3_HUMAN			PEAKS DB
NPREDYLDVYVFGVGPLVNQVNINALASKK	128.23	3331.76	30	2.7	833.949	100.54	1.0613-1.0893	420.68	0		11413	8449.2	13478	5	190163	csf EVTRAP 2_Slot2-38_1_5942.d	6	1	0	0	2	1	2	P00751|CFAB_HUMAN			PEAKS DB
HFDMPHDIVASEDGTVYIGDAHTNTVWK	127.97	3154.45	28	-1.3	789.618	87.88	1.0277-1.0557	701.44	1229.9	3019.8	9333.8	10311	9679.9	5	150720	csf EVTRAP 2_Slot2-38_1_5942.d	7	1	1	1	2	1	1	P19021|AMD_HUMAN			PEAKS DB
EEVLQYC(+57.02)QEMYPELQITNVMEANQR	127.94	3114.41	25	-0.3	1039.14	99.72	1.0591-1.0871	4123.7	3976.3	2939	0	0	1224.6	2	124084	csf 20k centrifugation 2_Slot2-37_1_5939.d	9	3	2	3	0	0	1	Q06481|APLP2_HUMAN	Carbamidomethylation	C7:Carbamidomethylation:1000.00	PEAKS DB
QLGAGSIEEC(+57.02)AAKC(+57.02)EEDEEFTC(+57.02)R	127.91	2688.11	23	3.2	897.047	70.19	0.9658-0.9939	514.23	840.04	399.64	7491.5	8557.4	7160.5	6	96973	csf EVTRAP 3_Slot2-38_1_5943.d	6	1	1	1	1	1	1	P00747|PLMN_HUMAN	Carbamidomethylation	C10:Carbamidomethylation:1000.00;C14:Carbamidomethylation:1000.00;C22:Carbamidomethylation:1000.00	PEAKS DB
TGTLQSNFC(+57.02)ASSLVVTATVK	127.9	2083.06	20	0.6	1042.54	92.55	1.2511-1.2788	5756.6	9348.3	7770.3	118800	125990	104580	6	143798	csf EVTRAP 3_Slot2-38_1_5943.d	25	2	2	2	6	7	6	Q15113|PCOC1_HUMAN	Carbamidomethylation	C9:Carbamidomethylation:1000.00	PEAKS DB
HTEC(+57.02)C(+57.02)HGDLLEC(+57.02)ADDRADLAK	127.89	2485.04	21	5.3	622.271	52.52	0.9161-0.9443	10263	69093	8077.4	1110	1425.4	794.22	2	40506	csf 20k centrifugation 2_Slot2-37_1_5939.d	12	3	3	3	1	1	1	P02768|ALBU_HUMAN	Carbamidomethylation	C4:Carbamidomethylation:1000.00;C5:Carbamidomethylation:1000.00;C12:Carbamidomethylation:1000.00	PEAKS DB
GC(+57.02)EMIC(+57.02)YC(+57.02)NFSELLC(+57.02)C(+57.02)PK	127.81	2339.92	18	1.9	1170.97	99.02	1.2844-1.3121	44080	46014	35425			0	2	121648	csf 20k centrifugation 2_Slot2-37_1_5939.d	8	3	3	2	0	0	0	O75711|SCRG1_HUMAN	Carbamidomethylation	C2:Carbamidomethylation:1000.00;C6:Carbamidomethylation:1000.00;C8:Carbamidomethylation:1000.00;C15:Carbamidomethylation:1000.00;C16:Carbamidomethylation:1000.00	PEAKS DB
YGTISPEEGVSYLENLDEMIALQTK	127.68	2799.35	25	-0.9	934.124	103.82	1.1341-1.1620	44122	35849	27387	201510	152740	168060	6	182519	csf EVTRAP 3_Slot2-38_1_5943.d	12	2	2	2	2	2	2	Q8WXD2|SCG3_HUMAN			PEAKS DB
YC(+57.02)VQLSQIQAQISALEEQLQQIR	127.61	2745.41	23	3.6	916.148	104.84	1.1520-1.1799	18491	8384	3003	13115	12348	8702.2	5	206493	csf EVTRAP 2_Slot2-38_1_5942.d	12	2	2	2	2	2	2	P13645|K1C10_HUMAN	Carbamidomethylation	C2:Carbamidomethylation:1000.00	PEAKS DB
YHFEALADTGISSEFYDNANDLLSK	127.56	2819.29	25	-0.9	940.771	98.92	1.0243-1.0524	845.64	1125.5		8002	7120.9	14514	6	163864	csf EVTRAP 3_Slot2-38_1_5943.d	11	1	1	0	3	1	5	P07357|CO8A_HUMAN			PEAKS DB
EFNAETFTFHADIC(+57.02)TLSEK	127.5	2259.02	19	-0.3	1130.51	95.64	1.3574-1.3850	992480	1696500	1453100	699690	712630	267600	5	167821	csf EVTRAP 2_Slot2-38_1_5942.d	138	18	16	22	29	35	18	P02768|ALBU_HUMAN	Carbamidomethylation	C14:Carbamidomethylation:1000.00	PEAKS DB
PQGLYPNYLNPSSGQWGQHHVSVGGLGDSFYEYLLK	127.47	4006.93	36	-3	1002.74	99.68	1.1330-1.1609				0		0	6	167342	csf EVTRAP 3_Slot2-38_1_5943.d	0	0	0	0	0	0	0	P33908|MA1A1_HUMAN			PEAKS DB
PVSWESFNNGDC(+57.02)FILDLGNNIHQWC(+57.02)GSNSNRYER	127.39	4084.8	34	5.5	1022.21	100.23	1.1207-1.1486				14689	18873	3748.1	5	189008	csf EVTRAP 2_Slot2-38_1_5942.d	3	0	0	0	1	1	1	P06396|GELS_HUMAN	Carbamidomethylation	C12:Carbamidomethylation:1000.00;C25:Carbamidomethylation:1000.00	PEAKS DB
EFQLHQHLFDPEHDYPGLGK	127.31	2406.14	20	-1.6	803.052	79.87	0.9770-1.0052	95300	109240	94921	4749.3	4065.6	4585.1	3	69883	csf 20k centrifugation 3_Slot2-37_1_5940.d	18	3	5	5	2	1	2	P05408|7B2_HUMAN			PEAKS DB
ASASYYEQYHSLNEIYSWIEFITERHPDMLTK	127.24	3920.84	32	0.9	981.217	103.35	1.1106-1.1386				2542.6	1439.9	709.64	5	201523	csf EVTRAP 2_Slot2-38_1_5942.d	3	0	0	0	1	1	1	Q96IY4|CBPB2_HUMAN			PEAKS DB
SC(+57.02)VGETTESTQC(+57.02)EDEELEHLR	127.24	2508.04	21	4.6	837.024	60.07	1.0018-1.0299	7522.7	10910	8174.1	214430	217400	157280	5	89785	csf EVTRAP 2_Slot2-38_1_5942.d	17	2	1	2	4	3	5	P10643|CO7_HUMAN	Carbamidomethylation	C2:Carbamidomethylation:1000.00;C12:Carbamidomethylation:1000.00	PEAKS DB
YTIAALLSPYSYSTTAVVTNPKE	127.23	2488.27	23	1.3	1245.15	100.44	1.4015-1.4291	166110	152120	134860	11261	12974	6225.1	2	126354	csf 20k centrifugation 2_Slot2-37_1_5939.d	15	5	2	4	2	1	1	P02766|TTHY_HUMAN			PEAKS DB
RHQEAQEAC(+57.02)SSQGLILHGSGMLLPC(+57.02)GSDRFR	127.17	3496.65	31	1.2	700.338	75.72	0.9939-1.0220	24691	32868	25410	126240	101760	84624	6	108149	csf EVTRAP 3_Slot2-38_1_5943.d	18	2	2	2	4	4	4	P51693|APLP1_HUMAN	Carbamidomethylation	C9:Carbamidomethylation:1000.00;C25:Carbamidomethylation:1000.00	PEAKS DB
LTSLSDRYVSHFETEGPHVLLYFDSVPTSR	127.14	3451.7	30	0.2	863.934	97.45	0.9928-1.0209	2166.2	4340.3	3503.4	69430	61949	69819	6	158010	csf EVTRAP 3_Slot2-38_1_5943.d	18	2	2	2	4	4	4	P0C0L5|CO4B_HUMAN:P0C0L4|CO4A_HUMAN			PEAKS DB
LGPHAGDVEGHLSFLEK	127.12	1804.91	17	2.8	602.646	71.14	0.9285-0.9567	18313	20535	23848	192500	162860	146800	6	98617	csf EVTRAP 3_Slot2-38_1_5943.d	37	2	3	7	9	7	9	P06727|APOA4_HUMAN			PEAKS DB
VVLSSGSGPGLDLPLVLGLPLQLK	127.09	2371.41	24	-3	1186.71	105.25	1.3331-1.3607	1194.1	1402.4	0		0		3	121272	csf 20k centrifugation 3_Slot2-37_1_5940.d	4	2	2	0	0	0	0	P04278|SHBG_HUMAN			PEAKS DB
DRQLAGAMVWALDLDDFQGSFC(+57.02)GQDLRFPLTNAIK	127.01	3967.93	35	0.4	992.991	103.12	1.1453-1.1732				0	0	0	5	200657	csf EVTRAP 2_Slot2-38_1_5942.d	0	0	0	0	0	0	0	P36222|CH3L1_HUMAN	Carbamidomethylation	C22:Carbamidomethylation:1000.00	PEAKS DB
TIHLTMPQLVLQGSYDLQDLLAQAELPAILHTELNLQK	126.99	4267.29	38	-0.9	1067.83	105.63	1.2144-1.2422	0	0		0	0	0	5	209250	csf EVTRAP 2_Slot2-38_1_5942.d	0	0	0	0	0	0	0	P01019|ANGT_HUMAN			PEAKS DB
KAGTELVNFLSYFVELGTQPATQ	126.99	2512.28	23	2.5	1257.15	105.65	1.3927-1.4203	5079.3	1520.7	1488.2	23714	27424	29844	6	188383	csf EVTRAP 3_Slot2-38_1_5943.d	15	3	1	2	3	3	3	P02652|APOA2_HUMAN			PEAKS DB
GNKPDFHLAMPTEQAEGFYNSFLEQLRK	126.98	3266.58	28	-0.8	817.652	99.64	1.0164-1.0445				1457.5	960.26	0	5	186528	csf EVTRAP 2_Slot2-38_1_5942.d	2	0	0	0	1	1	0	Q8TEA8|DTD1_HUMAN			PEAKS DB
VLRAQPVQVAEGSEPDGFWEALGGK	126.93	2639.33	25	-0.2	880.785	96.75	0.9815-1.0097				38550	40692	58144	6	155386	csf EVTRAP 3_Slot2-38_1_5943.d	9	0	0	0	3	3	3	P06396|GELS_HUMAN			PEAKS DB
QRPPDLDTSSNAVDLLFFTDESGDSR	126.78	2881.34	26	0.3	961.453	99.12	0.9928-1.0209	1334.8	1471.7	824.58	15010	20377	20944	6	164856	csf EVTRAP 3_Slot2-38_1_5943.d	8	1	1	1	1	2	2	P00736|C1R_HUMAN			PEAKS DB
HGSSSGSSSSYGQHGSGSR	126.77	1807.75	19	5	603.593	5.63	0.8833-0.9116	4984.2	2679.4	2695.8	10288	4145	0	6	626	csf EVTRAP 3_Slot2-38_1_5943.d	7	1	1	1	2	2	0	Q86YZ3|HORN_HUMAN			PEAKS DB
MDGLEEAHGMSAAMGPEPVVQSVR	126.75	2497.14	24	1.4	833.388	79.66	0.9782-1.0063	1489.7	1934.4	1020.3	23589	20368	19986	5	131951	csf EVTRAP 2_Slot2-38_1_5942.d	11	1	1	1	3	2	3	Q86UX2|ITIH5_HUMAN			PEAKS DB
FIC(+57.02)TSVPVDADMC(+57.02)AASVAAGGAEELR	126.74	2696.22	26	1	1349.12	97.28	1.3839-1.4115	6092.1	5660.6	5235.4	24848	34968	30163	6	157485	csf EVTRAP 3_Slot2-38_1_5943.d	12	2	2	2	2	2	2	Q15818|NPTX1_HUMAN	Carbamidomethylation	C3:Carbamidomethylation:1000.00;C13:Carbamidomethylation:1000.00	PEAKS DB
NEENAC(+57.02)HC(+57.02)SEDC(+57.02)LARGDC(+57.02)C(+57.02)TNYQVVC(+57.02)K	126.62	3348.28	27	7.9	838.083	48.35	1.0063-1.0344				32547	34540	25635	5	66103	csf EVTRAP 2_Slot2-38_1_5942.d	8	0	0	0	2	4	2	Q13822|ENPP2_HUMAN	Carbamidomethylation	C6:Carbamidomethylation:1000.00;C8:Carbamidomethylation:1000.00;C12:Carbamidomethylation:1000.00;C18:Carbamidomethylation:1000.00;C19:Carbamidomethylation:1000.00;C26:Carbamidomethylation:1000.00	PEAKS DB
DAC(+57.02)GC(+57.02)C(+57.02)PMC(+57.02)ARGEGEPC(+57.02)GGGGAGR	126.62	2497.91	24	1.4	833.644	37.33	0.9387-0.9669				23975	21811	15169	6	40485	csf EVTRAP 3_Slot2-38_1_5943.d	6	0	0	0	2	2	2	Q16270|IBP7_HUMAN	Carbamidomethylation	C3:Carbamidomethylation:1000.00;C5:Carbamidomethylation:1000.00;C6:Carbamidomethylation:1000.00;C9:Carbamidomethylation:1000.00;C17:Carbamidomethylation:1000.00	PEAKS DB
ARVALLASLQDGAFQNALMISQLLPVLNHK	126.56	3230.8	30	-6.1	808.701	104.48	1.0624-1.0905	667.18	265.46	134.33	10197	9188.2	8963.6	5	205430	csf EVTRAP 2_Slot2-38_1_5942.d	8	1	1	1	1	2	2	P20062|TCO2_HUMAN			PEAKS DB
DRC(+57.02)GEVRNEENAC(+57.02)HC(+57.02)SEDC(+57.02)LARGDC(+57.02)C(+57.02)TNYQVVC(+57.02)K	126.54	4220.67	34	1	845.142	48.3	1.0142-1.0423				136690	142470	92582	6	57180	csf EVTRAP 3_Slot2-38_1_5943.d	16	0	0	0	5	5	6	Q13822|ENPP2_HUMAN	Carbamidomethylation	C3:Carbamidomethylation:1000.00;C13:Carbamidomethylation:1000.00;C15:Carbamidomethylation:1000.00;C19:Carbamidomethylation:1000.00;C25:Carbamidomethylation:1000.00;C26:Carbamidomethylation:1000.00;C33:Carbamidomethylation:1000.00	PEAKS DB
EGLDLQVLEDSGRGVQIQAHPSQLVLTLEGEDLGELDK	126.47	4100.09	38	-0.4	1026.03	100.35	1.2311-1.2588				0	0	0	4	189962	csf EVTRAP 1_Slot2-38_1_5937.d	0	0	0	0	0	0	0	O94985|CSTN1_HUMAN			PEAKS DB
LTWIPGDANNSPITDYVVQFEEDQFQPGVWHDHSK	126.32	4068.89	35	5.1	1018.24	101.68	1.0994-1.1274	0	0		0	2683.3	0	5	194910	csf EVTRAP 2_Slot2-38_1_5942.d	2	0	0	0	0	2	0	O94856|NFASC_HUMAN			PEAKS DB
SVAVYGQYGGQPC(+57.02)VGNAFETQSC(+57.02)EPTRGC(+57.02)PTEEGC(+57.02)GER	126.3	4193.76	38	1.1	1049.45	72.5	1.1162-1.1441	943.49	2056.2	0	68720	60653	102830	4	114323	csf EVTRAP 1_Slot2-38_1_5937.d	7	1	1	0	1	3	1	P10643|CO7_HUMAN	Carbamidomethylation	C13:Carbamidomethylation:1000.00;C23:Carbamidomethylation:1000.00;C29:Carbamidomethylation:1000.00;C35:Carbamidomethylation:1000.00	PEAKS DB
VFVTNPDGSPAYRVPVAVQGEDTVQSLTQGDGVAK	126.28	3600.81	35	2.4	1201.28	96.02	1.1475-1.1754	1292.2	2520.1	1563.2	16066	18559	14441	5	171955	csf EVTRAP 2_Slot2-38_1_5942.d	8	1	1	1	2	2	1	P01024|CO3_HUMAN			PEAKS DB
TASPDPGEVVSSAC(+57.02)AADEPVTVLTVILDADLTK	126.23	3340.66	33	1.1	1114.56	105.67	1.1263-1.1542	14433	8966.7	10021				2	138846	csf 20k centrifugation 2_Slot2-37_1_5939.d	9	3	3	3	0	0	0	Q14118|DAG1_HUMAN	Carbamidomethylation	C14:Carbamidomethylation:1000.00	PEAKS DB
SRLLATLC(+57.02)SAEVC(+57.02)QC(+57.02)AEGK	126.22	2152.01	19	5.4	718.347	69.28	0.8969-0.9251	7437	9130.3	6238	177920	182120	173360	6	95259	csf EVTRAP 3_Slot2-38_1_5943.d	13	1	2	2	3	2	3	P0C0L5|CO4B_HUMAN:P0C0L4|CO4A_HUMAN	Carbamidomethylation	C8:Carbamidomethylation:1000.00;C13:Carbamidomethylation:1000.00;C15:Carbamidomethylation:1000.00	PEAKS DB
TMGYQDFADVVC(+57.02)YTQK	126.15	1924.83	16	2.7	963.427	93.56	1.1520-1.1799	6022.3	5364.2	3262.7	54792	61915	38186	5	165396	csf EVTRAP 2_Slot2-38_1_5942.d	10	2	1	1	2	2	2	P05156|CFAI_HUMAN	Carbamidomethylation	C12:Carbamidomethylation:1000.00	PEAKS DB
GNVVVTNIAQLVIYNAQLQDAGIYTC(+57.02)TAR	125.97	3164.63	29	1.4	1055.88	103.49	1.1319-1.1598	1077.9	831.09	1063.4	6260.6	4043.9	4841.1	4	202098	csf EVTRAP 1_Slot2-38_1_5937.d	7	1	1	1	1	1	2	Q8TEU8|WFKN2_HUMAN	Carbamidomethylation	C26:Carbamidomethylation:1000.00	PEAKS DB
VYC(+57.02)DMNTENGGWTVIQNR	125.95	2155.94	18	0.6	1078.98	76.26	1.1955-1.2233	35241	42333	31937	57075	54391	52436	5	124748	csf EVTRAP 2_Slot2-38_1_5942.d	12	2	2	2	2	2	2	P02675|FIBB_HUMAN	Carbamidomethylation	C3:Carbamidomethylation:1000.00	PEAKS DB
RM(+15.99)PC(+57.02)AEDYLSVVLNQLC(+57.02)VLHEK	125.94	2689.3	22	-1.8	673.332	101.26	0.9274-0.9556	231880	175340	142560	68518	74391	65084	5	193085	csf EVTRAP 2_Slot2-38_1_5942.d	25	8	5	5	2	2	3	P02768|ALBU_HUMAN	Oxidation (M); Carbamidomethylation	M2:Oxidation (M):1000.00;C4:Carbamidomethylation:1000.00;C17:Carbamidomethylation:1000.00	PEAKS DB
FDLVPVPTNLYGDFFTGDAYVILK	125.91	2703.38	24	0.4	1352.7	105.46	1.4026-1.4302	13798	52689	29003	479950	508650	526930	5	208131	csf EVTRAP 2_Slot2-38_1_5942.d	94	2	4	4	28	28	28	P06396|GELS_HUMAN			PEAKS DB
LLSHC(+57.02)LLVTLAAHLPAEFTPAVHASLDK	125.88	3023.63	28	-1.4	756.913	100.17	1.0310-1.0591				7658.5	8290.2	5441.9	6	169185	csf EVTRAP 3_Slot2-38_1_5943.d	7	0	0	0	2	3	2	P69905|HBA_HUMAN	Carbamidomethylation	C5:Carbamidomethylation:1000.00	PEAKS DB
TPEVTC(+57.02)VVVDVSHEDPEVQFK	125.88	2413.15	21	1.2	805.391	90.17	1.0209-1.0490	2269.1	7388.8	3062.5	253130	173400	173420	4	156974	csf EVTRAP 1_Slot2-38_1_5937.d	23	2	3	2	5	7	4	P01860|IGHG3_HUMAN	Carbamidomethylation	C6:Carbamidomethylation:1000.00	PEAKS DB
C(+57.02)GPPPPIDNGDITSFPLSVYAPASSVEYQC(+57.02)QNLYQLEGNK	125.85	4425.06	40	3	1476.03	100.86	1.2177-1.2455	0	0	0	0	0	0	6	171924	csf EVTRAP 3_Slot2-38_1_5943.d	0	0	0	0	0	0	0	P08603|CFAH_HUMAN:Q03591|FHR1_HUMAN	Carbamidomethylation	C1:Carbamidomethylation:1000.00;C30:Carbamidomethylation:1000.00	PEAKS DB
GTVIDVTDFVNWASSINDAPVLISQK	125.79	2788.43	26	3.9	930.487	104.72	1.1240-1.1520	9609.4	9278	5195.3	127720	134460	114920	6	185413	csf EVTRAP 3_Slot2-38_1_5943.d	17	2	2	2	4	4	3	P02748|CO9_HUMAN			PEAKS DB
TSRLPIIDVAPLDVGAPDQEFGFDVGPVC(+57.02)FL	125.77	3343.68	31	1.8	1115.57	105.51	1.0781-1.1061	1721.3	0	0	26240	25860	31774	5	208747	csf EVTRAP 2_Slot2-38_1_5942.d	6	1	0	0	2	2	1	P02452|CO1A1_HUMAN	Carbamidomethylation	C29:Carbamidomethylation:1000.00	PEAKS DB
VREEVVTVGNSVNEGLNQPTDDSC(+57.02)FDPYTVSHYAVGDEWER	125.7	4669.09	41	2.9	1168.28	96.06	1.0423-1.0703	0	0	0	0	0	0	6	152947	csf EVTRAP 3_Slot2-38_1_5943.d	0	0	0	0	0	0	0	P02751|FINC_HUMAN	Carbamidomethylation	C24:Carbamidomethylation:1000.00	PEAKS DB
SLGEC(+57.02)C(+57.02)DVEDSTTC(+57.02)FNAK	125.67	2091.82	18	1	1046.92	59.69	1.1754-1.2033	47871	67002	47193	4451.5	5034	4196.3	2	50358	csf 20k centrifugation 2_Slot2-37_1_5939.d	11	2	4	2	1	1	1	P02774|VTDB_HUMAN	Carbamidomethylation	C5:Carbamidomethylation:1000.00;C6:Carbamidomethylation:1000.00;C14:Carbamidomethylation:1000.00	PEAKS DB
LQETSNWLLSQQQADGSFQDPC(+57.02)PVLDR	125.63	3131.46	27	2.9	1044.83	97.85	1.0490-1.0770	1930.3	3486.2	2088	0	0	2953.2	3	102018	csf 20k centrifugation 3_Slot2-37_1_5940.d	7	1	2	1	0	0	3	P0C0L4|CO4A_HUMAN	Carbamidomethylation	C22:Carbamidomethylation:1000.00	PEAKS DB
M(+15.99)PC(+57.02)AEDYLSVVLNQLC(+57.02)VLHEK	125.6	2533.2	21	3.2	845.41	102.76	1.0647-1.0927	4207.8	3347.6	2480.5	1742.6	2104.5	1080.5	2	132953	csf 20k centrifugation 2_Slot2-37_1_5939.d	10	1	2	1	2	2	2	P02768|ALBU_HUMAN	Oxidation (M); Carbamidomethylation	M1:Oxidation (M):1000.00;C3:Carbamidomethylation:1000.00;C16:Carbamidomethylation:1000.00	PEAKS DB
VDFTLSSERDFALLSLQVPLK	125.56	2377.29	21	1.3	793.438	101.37	1.0681-1.0961	17491	17680	12961	130770	111970	101520	6	173747	csf EVTRAP 3_Slot2-38_1_5943.d	21	3	3	2	4	4	5	P0C0L5|CO4B_HUMAN:P0C0L4|CO4A_HUMAN			PEAKS DB
ITYGETGGNSPVQEFTVPGSK	125.52	2167.04	21	2.1	1084.53	79.39	1.1932-1.2211	37775	43736	34463	292150	261150	267570	5	131153	csf EVTRAP 2_Slot2-38_1_5942.d	14	2	2	2	3	2	3	P02751|FINC_HUMAN			PEAKS DB
VQSTELC(+57.02)AGHLAGGTDSC(+57.02)QGDSGGPLVC(+57.02)FEK	125.49	3236.42	31	3.7	1079.82	79.39	1.0725-1.1005	11114	13430	9478	31895	28508	28757	5	131239	csf EVTRAP 2_Slot2-38_1_5942.d	6	1	1	1	1	1	1	P00747|PLMN_HUMAN	Carbamidomethylation	C7:Carbamidomethylation:1000.00;C18:Carbamidomethylation:1000.00;C28:Carbamidomethylation:1000.00	PEAKS DB
TFPGFFSPMLGEFVSETESR	125.41	2264.05	20	1.8	1133.03	103.9	1.2633-1.2910	102070	71998	63870	139060	137790	105400	6	182901	csf EVTRAP 3_Slot2-38_1_5943.d	19	3	3	3	4	3	3	P02671|FIBA_HUMAN			PEAKS DB
TKEEYGHSEVVEYYC(+57.02)NPR	125.39	2258.99	18	1.6	754.005	48.3	0.9251-0.9534	6096	5435.8	4511.6	162260	176660	103360	6	57143	csf EVTRAP 3_Slot2-38_1_5943.d	24	3	3	2	5	7	4	P08603|CFAH_HUMAN	Carbamidomethylation	C15:Carbamidomethylation:1000.00	PEAKS DB
C(+57.02)DGPLSVSSFILPHRPDNEESC(+57.02)NSSEDESK	125.38	3391.46	30	-1.7	848.87	87.05	1.0085-1.0366		0		105180	108740	88637	6	134238	csf EVTRAP 3_Slot2-38_1_5943.d	10	0	0	0	4	4	2	Q13822|ENPP2_HUMAN	Carbamidomethylation	C1:Carbamidomethylation:1000.00;C22:Carbamidomethylation:1000.00	PEAKS DB
KAEEEHLGILGPQLHADVGDK	125.32	2255.15	21	4.9	752.729	63.32	0.9342-0.9624	2596	4000.4	5063.9	31091	30035	27041	6	83669	csf EVTRAP 3_Slot2-38_1_5943.d	11	1	1	2	3	2	2	P00450|CERU_HUMAN			PEAKS DB
IMNGEADAMSLDGGFVYIAGK	125.31	2158.01	21	1.6	1080.01	98.68	1.2544-1.2821	10823	11343	12292	0	1091.3	1151.6	2	120197	csf 20k centrifugation 2_Slot2-37_1_5939.d	6	1	1	2	0	1	1	P02787|TRFE_HUMAN			PEAKS DB
SLAGGSPGAAEAPGSAQVAGLC(+57.02)GR	125.27	2140.03	24	2.8	1071.03	65.1	1.2044-1.2322	119200	135520	111760	254310	279360	219520	5	100866	csf EVTRAP 2_Slot2-38_1_5942.d	23	4	3	4	3	5	4	P51693|APLP1_HUMAN	Carbamidomethylation	C22:Carbamidomethylation:1000.00	PEAKS DB
MVQEQC(+57.02)C(+57.02)HSQLEELHC(+57.02)ATGISLANEQDR	125.23	3342.45	28	5.5	836.624	69.9	1.0591-1.0871	57158	54539	18064	215650	177490	114840	6	96539	csf EVTRAP 3_Slot2-38_1_5943.d	22	3	4	4	3	4	4	P23142|FBLN1_HUMAN	Carbamidomethylation	C6:Carbamidomethylation:1000.00;C7:Carbamidomethylation:1000.00;C16:Carbamidomethylation:1000.00	PEAKS DB
VHTEC(+57.02)C(+57.02)HGDLLEC(+57.02)ADDR	125.19	2085.83	17	1.2	696.285	42.62	0.8720-0.9003	110710	119490	95418	7444.8	9179.4	5040.6	2	29994	csf 20k centrifugation 2_Slot2-37_1_5939.d	24	8	5	5	2	2	2	P02768|ALBU_HUMAN	Carbamidomethylation	C5:Carbamidomethylation:1000.00;C6:Carbamidomethylation:1000.00;C13:Carbamidomethylation:1000.00	PEAKS DB
TNTFRPTMPEEVTRPNYPGIMYLQSDFDLGC(+57.02)TC(+57.02)DDK	125.03	4267.9	36	0.8	1067.98	98.05	0.9703-0.9984	0	0			0	0	6	160741	csf EVTRAP 3_Slot2-38_1_5943.d	0	0	0	0	0	0	0	Q13822|ENPP2_HUMAN	Carbamidomethylation	C31:Carbamidomethylation:1000.00;C33:Carbamidomethylation:1000.00	PEAKS DB
RAPSTWLTAYVVKVFSLAVNLIAIDSQVLC(+57.02)GAVK	124.96	3689.04	34	1	923.268	107.83	1.1732-1.2010		0		20579	14802	15414	5	214810	csf EVTRAP 2_Slot2-38_1_5942.d	6	0	0	0	2	2	2	P01024|CO3_HUMAN	Carbamidomethylation	C30:Carbamidomethylation:1000.00	PEAKS DB
NYRIDTINLFPATLFDAYMVAQNPGEWMLSC(+57.02)QNLNHLK	124.94	4497.17	38	0.5	1125.3	104.49	1.2888-1.3165				0	0	0	5	205483	csf EVTRAP 2_Slot2-38_1_5942.d	0	0	0	0	0	0	0	P00450|CERU_HUMAN	Carbamidomethylation	C31:Carbamidomethylation:1000.00	PEAKS DB
QGGLVGNDETVALTAFVTIALHHGLAVFQDEGAEPLK	124.94	3816.97	37	4.3	955.254	105.63	1.1252-1.1531				945.65	0		5	209239	csf EVTRAP 2_Slot2-38_1_5942.d	1	0	0	0	1	0	0	P0C0L5|CO4B_HUMAN:P0C0L4|CO4A_HUMAN			PEAKS DB
LHEAFSPVSYQHDLALLR	124.91	2095.09	18	0.6	699.369	85.27	0.9082-0.9364	722.24	956.77		20310	17891	15580	6	128274	csf EVTRAP 3_Slot2-38_1_5943.d	10	1	1	0	2	2	4	P00748|FA12_HUMAN			PEAKS DB
NADMSEDMQQDAVDC(+57.02)ATQAMEK	124.85	2486.97	22	1.8	1244.49	80.74	1.3209-1.3486	336.09	0	0	2378.9	4156.9	1295	5	134459	csf EVTRAP 2_Slot2-38_1_5942.d	7	1	0	0	1	2	3	Q96FJ2|DYL2_HUMAN	Carbamidomethylation	C15:Carbamidomethylation:1000.00	PEAKS DB
ITPGKPYILTVPGHLDEMQLDIQAR	124.82	2804.49	25	2.9	702.132	96.75	0.9714-0.9995	5766.6	11852	6213.6	86143	59254	34676	5	174716	csf EVTRAP 2_Slot2-38_1_5942.d	21	2	3	4	4	4	4	P0C0L5|CO4B_HUMAN:P0C0L4|CO4A_HUMAN			PEAKS DB
GSLGGGFSSGGFSGGSFSR	124.79	1706.76	19	-0.2	854.389	75.61	1.0781-1.1061	37117	49261	35479	113250	98091	77405	2	72697	csf 20k centrifugation 2_Slot2-37_1_5939.d	25	4	3	3	5	4	6	P13645|K1C10_HUMAN			PEAKS DB
C(+57.02)PPGAHAC(+57.02)GPC(+57.02)LQPFQEDQQGLC(+57.02)VPR	124.75	2978.3	26	0.9	993.776	78.76	1.0209-1.0490	3105.6	4177.5	3689.7	61772	57995	56564	6	114152	csf EVTRAP 3_Slot2-38_1_5943.d	9	2	1	1	2	2	1	Q9NQX5|NPDC1_HUMAN	Carbamidomethylation	C1:Carbamidomethylation:1000.00;C8:Carbamidomethylation:1000.00;C11:Carbamidomethylation:1000.00;C23:Carbamidomethylation:1000.00	PEAKS DB
SQETGDLDVGGLQETDK	124.68	1790.82	17	2.6	896.418	59.8	1.0927-1.1207	35089	56976	37697	540250	530110	475190	6	76805	csf EVTRAP 3_Slot2-38_1_5943.d	37	2	1	3	8	9	14	P23142|FBLN1_HUMAN			PEAKS DB
TETITGFQVDAVPANGQTPIQR	124.64	2342.19	22	-1.1	1172.1	84.73	1.3154-1.3430	9084.6	5058.8	8021	12275	42002	42057	6	126852	csf EVTRAP 3_Slot2-38_1_5943.d	18	5	3	3	1	1	5	P02751|FINC_HUMAN			PEAKS DB
LLNLGLITESQAHTLEDEVAEVLQK	124.55	2762.47	25	2.7	921.833	103.89	1.0456-1.0737	59269	53025	32893	157360	156530	127130	2	135607	csf 20k centrifugation 2_Slot2-37_1_5939.d	23	3	3	3	4	5	5	Q8WXD2|SCG3_HUMAN			PEAKS DB
SALYSPSDPLTLLQADTVR	124.53	2046.06	19	3.5	1024.04	100.06	1.2344-1.2622	4695.7	4535	3798.6	21706	24635	17902	6	168798	csf EVTRAP 3_Slot2-38_1_5943.d	9	1	1	1	2	2	2	O00391|QSOX1_HUMAN			PEAKS DB
KPVAFSDYIHPVC(+57.02)LPDRETAASLLQAGYK	124.5	3245.65	29	1.8	812.422	96.69	1.0636-1.0916	3049.4	5649.8	5423	4564.3	8469	6887.4	6	155324	csf EVTRAP 3_Slot2-38_1_5943.d	9	1	1	2	1	2	2	P00734|THRB_HUMAN	Carbamidomethylation	C13:Carbamidomethylation:1000.00	PEAKS DB
VILGAHQEVNLEPHVQEIEVSR	124.48	2495.31	22	-0.7	832.778	75.65	1.0164-1.0445	15884	20390	12775	83646	56880	51263	4	121350	csf EVTRAP 1_Slot2-38_1_5937.d	18	2	2	2	4	4	4	P00747|PLMN_HUMAN			PEAKS DB
SSSRGPYESGSGHSSGLGHQESR	124.45	2345.04	23	2.2	587.268	18.67	0.8788-0.9071	1636.8	1423.3	0	5296.5	5505.9	4391.6	5	15661	csf EVTRAP 2_Slot2-38_1_5942.d	5	1	1	0	1	1	1	Q86YZ3|HORN_HUMAN			PEAKS DB
AGFEWNEDGAGTTPSPGLQPAHLTFPLDYHLNQPFIFVLR	124.36	4452.2	40	2.6	1114.06	102.48	1.0703-1.0983				834.95	0	0	5	198111	csf EVTRAP 2_Slot2-38_1_5942.d	1	0	0	0	1	0	0	P36955|PEDF_HUMAN			PEAKS DB
LRPEMEGPGSFTIFAPSNEAWASLPAEVLDSLVSNVNIELLNALRYHMVGRR	124.33	5765.94	52	-0.7	961.997	106.67	1.1374-1.1654				3483.6	0	0	4	212868	csf EVTRAP 1_Slot2-38_1_5937.d	1	0	0	0	1	0	0	Q15582|BGH3_HUMAN			PEAKS DB
VLYDAEISQIHQSVTDTNVILSMDNSR	124.32	3047.49	27	3.7	1016.84	97.77	1.0613-1.0893	6443.7	9052.9	6913	3209.2	1699.8	907.55	6	159555	csf EVTRAP 3_Slot2-38_1_5943.d	12	3	4	2	1	1	1	P35908|K22E_HUMAN			PEAKS DB
IIDGGSGYLC(+57.02)EMEPVAHFGLGK	124.29	2349.11	22	0	784.045	97	0.9793-1.0074	0	1661.8	0	71644	84579	70075	5	175744	csf EVTRAP 2_Slot2-38_1_5942.d	9	0	2	0	2	3	2	Q9NQ79|CRAC1_HUMAN	Carbamidomethylation	C10:Carbamidomethylation:1000.00	PEAKS DB
HLEEPGETQNAFLNERK	124.25	2010.98	17	5.5	671.336	49.37	0.9342-0.9624	31663	41608	29582	167630	187610	134450	5	68042	csf EVTRAP 2_Slot2-38_1_5942.d	14	1	2	1	4	3	3	P05060|SCG1_HUMAN			PEAKS DB
TSGHLLC(+57.02)GGVLIHPLWVLTAAHC(+57.02)K	124.25	2639.38	24	-0.3	660.853	97.45	0.9500-0.9782	2858.5	4673.3	2044.4	58212	21607	19828	4	178164	csf EVTRAP 1_Slot2-38_1_5937.d	16	1	2	1	4	4	4	Q92876|KLK6_HUMAN	Carbamidomethylation	C7:Carbamidomethylation:1000.00;C23:Carbamidomethylation:1000.00	PEAKS DB
SFHPLASSLPC(+57.02)DFHLLNLR	124.25	2223.13	19	0.5	742.05	97.74	1.0108-1.0389	1106.5	1235.6	599.59	7195.6	5777.2	5134.7	5	178864	csf EVTRAP 2_Slot2-38_1_5942.d	8	1	1	1	2	1	2	P49641|MA2A2_HUMAN	Carbamidomethylation	C11:Carbamidomethylation:1000.00	PEAKS DB
SQEESEEGEEDATSEVDK	124.22	1996.79	18	1.5	999.402	35.21	1.1341-1.1620		0		18794	27394	13645	5	41710	csf EVTRAP 2_Slot2-38_1_5942.d	11	0	0	0	4	5	2	P05060|SCG1_HUMAN			PEAKS DB
LIDQYGTHYLQSGSLGGEYR	124.21	2256.08	20	2.7	753.036	73.63	0.9353-0.9635	12540	15466	11315	210820	204980	209070	5	119337	csf EVTRAP 2_Slot2-38_1_5942.d	21	2	3	2	4	6	4	P10643|CO7_HUMAN			PEAKS DB
MGHLTC(+57.02)FAGGMFALGADAAPEGMAQHYLELGAEIAR	124.09	3762.74	36	2.3	941.695	101.42	1.1721-1.1999				0	1061.6	585.9	4	194175	csf EVTRAP 1_Slot2-38_1_5937.d	2	0	0	0	0	1	1	P33908|MA1A1_HUMAN	Carbamidomethylation	C6:Carbamidomethylation:1000.00	PEAKS DB
FTQVTPTSLSAQWTPPNVQLTGYR	124	2691.37	24	1	1346.69	98.54	1.4313-1.4588	34655	33353	26858	74782	79335	103150	6	162639	csf EVTRAP 3_Slot2-38_1_5943.d	12	2	2	2	2	2	2	P02751|FINC_HUMAN			PEAKS DB
APDAGGC(+57.02)LHADPDLGVLC(+57.02)PTGC(+57.02)QLQEALLQQERPIR	123.93	3954.91	36	3.2	989.739	97.85	1.1263-1.1542	6345.8	9757.6	0	0	0	1930	2	117122	csf 20k centrifugation 2_Slot2-37_1_5939.d	3	1	1	0	0	0	1	P02675|FIBB_HUMAN	Carbamidomethylation	C7:Carbamidomethylation:1000.00;C18:Carbamidomethylation:1000.00;C22:Carbamidomethylation:1000.00	PEAKS DB
EC(+57.02)VGFEAVQEVPVGLVQPASATLYDYYNPER	123.9	3499.66	31	4.5	1167.57	101.41	1.1229-1.1508	582.27	1341.6	1385.8	1233.9	0	3142.3	6	173996	csf EVTRAP 3_Slot2-38_1_5943.d	7	1	1	2	1	0	2	P0C0L5|CO4B_HUMAN:P0C0L4|CO4A_HUMAN	Carbamidomethylation	C2:Carbamidomethylation:1000.00	PEAKS DB
RYTIAALLSPYSYSTTAVVTNPKE	123.87	2644.37	24	-6.1	882.46	98.2	0.9714-0.9995	149570	161510	108520		2296.5	1094.7	2	118360	csf 20k centrifugation 2_Slot2-37_1_5939.d	14	4	5	3	0	1	1	P02766|TTHY_HUMAN			PEAKS DB
AWRPALYLAALDC(+57.02)AEETNSAVC(+57.02)R	123.87	2636.25	23	-0.3	879.756	98.17	1.0074-1.0355				2899.9	3346.2	6807.8	6	161118	csf EVTRAP 3_Slot2-38_1_5943.d	4	0	0	0	2	1	1	O00391|QSOX1_HUMAN	Carbamidomethylation	C13:Carbamidomethylation:1000.00;C22:Carbamidomethylation:1000.00	PEAKS DB
EKETLITIMKTLIDFVKMMVK	123.82	2510.39	21	-3.7	837.802	107.28	1.0826-1.1106		1328.2	115.03	35051	25101	19940	5	213697	csf EVTRAP 2_Slot2-38_1_5942.d	10	0	2	1	3	2	2	Q8WXD2|SCG3_HUMAN			PEAKS DB
TNEIVEEQYTPQSLATLESVFQELGK	123.74	2952.46	26	2.4	985.163	103.82	1.0658-1.0938	28176	13282	13881				3	118946	csf 20k centrifugation 3_Slot2-37_1_5940.d	14	4	4	6	0	0	0	P13521|SCG2_HUMAN			PEAKS DB
AAEC(+57.02)PAGFVRPPLIIFSVDGFR	123.66	2418.25	22	-5.4	807.087	101.43	0.9432-0.9714	5297	4769.9	4689.2	197490	193330	173950	5	193834	csf EVTRAP 2_Slot2-38_1_5942.d	18	1	1	1	5	4	6	Q13822|ENPP2_HUMAN	Carbamidomethylation	C4:Carbamidomethylation:1000.00	PEAKS DB
C(+57.02)PMIPC(+57.02)YISSPDEC(+57.02)LWMDWVTEK	123.66	2916.23	23	-3.5	973.081	102.89	1.0029-1.0310	1145.9	559.27	376.76	51045	29811	50137	6	179349	csf EVTRAP 3_Slot2-38_1_5943.d	9	1	1	1	2	2	2	P16035|TIMP2_HUMAN	Carbamidomethylation	C1:Carbamidomethylation:1000.00;C6:Carbamidomethylation:1000.00;C14:Carbamidomethylation:1000.00	PEAKS DB
GGETAQSADPQWEQLNNK	123.64	1971.89	18	1.9	986.955	55.19	1.1609-1.1888	24623	53575	23979	75718	83452	63297	5	79821	csf EVTRAP 2_Slot2-38_1_5942.d	7	1	1	1	2	1	1	P05546|HEP2_HUMAN			PEAKS DB
LC(+57.02)TVATLRETYGEMADC(+57.02)C(+57.02)AK	123.6	2348.03	20	2.2	783.685	76.82	0.9297-0.9579	220800	224660	192550	337880	306300	287600	2	75395	csf 20k centrifugation 2_Slot2-37_1_5939.d	73	12	18	10	10	10	13	P02768|ALBU_HUMAN	Carbamidomethylation	C2:Carbamidomethylation:1000.00;C17:Carbamidomethylation:1000.00;C18:Carbamidomethylation:1000.00	PEAKS DB
SC(+57.02)SVMHEALHNHYTQK	123.58	1940.86	16	-0.4	647.961	35.17	0.8912-0.9195	85884	84654	66689	1865100	2039500	1378400	5	42719	csf EVTRAP 2_Slot2-38_1_5942.d	64	2	2	2	19	21	18	P0DOX5|IGG1_HUMAN:P01859|IGHG2_HUMAN:P01861|IGHG4_HUMAN	Carbamidomethylation	C2:Carbamidomethylation:1000.00	PEAKS DB
VVSVLTVVHQDWLNGK	123.57	1792.98	16	3.1	897.502	97.21	1.2188-1.2466	46344	53129	34719	184590	202940	122140	6	157213	csf EVTRAP 3_Slot2-38_1_5943.d	15	2	2	3	3	2	3	P01859|IGHG2_HUMAN			PEAKS DB
EINLAPDSSSVVVSGLMVATK	123.55	2116.11	21	0	1059.06	99.22	1.2788-1.3065	48327	51734	41902	164730	87410	195350	6	165163	csf EVTRAP 3_Slot2-38_1_5943.d	19	2	2	2	4	4	5	P02751|FINC_HUMAN			PEAKS DB
VALLASLQDGAFQNALMISQLLPVLNHK	123.54	3003.66	28	-0.1	1002.23	105.53	1.2110-1.2388	904.36	668.84	0	10533	6789.3	2647.6	4	209060	csf EVTRAP 1_Slot2-38_1_5937.d	7	1	1	0	2	2	1	P20062|TCO2_HUMAN			PEAKS DB
YRLTYAYFAGGDAGDAFDGFDFGDDPSDK	123.47	3152.33	29	-0.7	1051.78	99.45	1.0636-1.0916				5266.8	6404.8	6342.6	5	185531	csf EVTRAP 2_Slot2-38_1_5942.d	3	0	0	0	1	1	1	P02679|FIBG_HUMAN			PEAKS DB
GVSYLLMGQVEENRGPVLPPESFVVLHRPNQDQILTNLSK	123.43	4473.35	40	-2	1119.34	98.78	1.1151-1.1430	1610.6	1807.6	550.39	21057	17893	18692	6	163660	csf EVTRAP 3_Slot2-38_1_5943.d	6	1	1	1	1	1	1	Q15113|PCOC1_HUMAN			PEAKS DB
EVYMPSSIFQDDFVIPDISEPGTWK	123.36	2899.36	25	0.5	1450.69	103.6	1.4181-1.4456	16747	10549	5980.3	55968	95032	128360	5	202213	csf EVTRAP 2_Slot2-38_1_5942.d	15	3	2	2	3	2	3	P0C0L5|CO4B_HUMAN:P0C0L4|CO4A_HUMAN			PEAKS DB
AVDQSVLLMKPDAELSASSVYNLLPEK	123.35	2916.52	27	1.8	973.181	99.65	1.0580-1.0860	2434	3774.4	2930.5			0	3	107994	csf 20k centrifugation 3_Slot2-37_1_5940.d	4	2	1	1	0	0	0	P01023|A2MG_HUMAN			PEAKS DB
IGAHIATPEQLYAAYLGGYEQC(+57.02)DAGWLSDQTVR	123.35	3652.73	33	3.7	1218.59	100.38	1.1787-1.2066	10581	7995.5	6830.1	1015.4	1145.3	1585.7	2	126291	csf 20k centrifugation 2_Slot2-37_1_5939.d	6	1	1	1	1	1	1	Q96GW7|PGCB_HUMAN	Carbamidomethylation	C22:Carbamidomethylation:1000.00	PEAKS DB
LNPGALLPVLTDPALNDLYVISTFK	123.33	2683.48	25	-0.3	895.501	105.75	1.1095-1.1374	880.87	493.32	412.16	6969.1	7016.8	6068.7	6	188736	csf EVTRAP 3_Slot2-38_1_5943.d	7	1	1	1	1	1	2	P35443|TSP4_HUMAN			PEAKS DB
SSHPC(+57.02)GIMQTPC(+57.02)AC(+57.02)LGGEAGGPAAGPLAPR	123.29	2976.35	30	2.7	993.125	78.78	1.0624-1.0905	802.95	1105.2		11580	10510	8552.4	5	129890	csf EVTRAP 2_Slot2-38_1_5942.d	5	1	1	0	1	1	1	O14514|AGRB1_HUMAN	Carbamidomethylation	C5:Carbamidomethylation:1000.00;C12:Carbamidomethylation:1000.00;C14:Carbamidomethylation:1000.00	PEAKS DB
AQPVQVAEGSEPDGFWEALGGK	123.23	2271.08	22	1.8	1136.55	98	1.2466-1.2744	129490	139070	114390	25470	34538	160430	2	117616	csf 20k centrifugation 2_Slot2-37_1_5939.d	29	3	5	4	5	5	7	P06396|GELS_HUMAN			PEAKS DB
VLAFTSVGDGPLSDPIQVK	123.17	1942.04	19	2.3	972.03	98.45	1.2244-1.2522	474.66	528.17	583.67	6209.1	6586.2	4958.1	5	181829	csf EVTRAP 2_Slot2-38_1_5942.d	6	1	1	1	1	1	1	Q13332|PTPRS_HUMAN			PEAKS DB
MSGEC(+57.02)APNVSVSVSTSHTTISGGGSR	123.09	2564.16	26	3.4	855.73	58.19	0.9905-1.0187	37338	47438	33570	182190	218580	137100	5	86330	csf EVTRAP 2_Slot2-38_1_5942.d	15	1	1	1	3	6	3	P04264|K2C1_HUMAN	Carbamidomethylation	C5:Carbamidomethylation:1000.00	PEAKS DB
GDSGGPLVC(+57.02)GGVLEGVVTSGSR	122.93	2059	22	3.4	1030.51	91.92	1.1888-1.2166	4030.3	7170.1	4071.8	68042	50944	61361	6	143102	csf EVTRAP 3_Slot2-38_1_5943.d	20	2	3	1	5	4	5	P00746|CFAD_HUMAN	Carbamidomethylation	C9:Carbamidomethylation:1000.00	PEAKS DB
SDLEMQYETLQEELMALK	122.93	2170.02	18	3.9	1086.02	101.91	1.2500-1.2777	21172	18895	16703	53204	54321	33950	6	175824	csf EVTRAP 3_Slot2-38_1_5943.d	12	1	1	1	3	3	3	P35527|K1C9_HUMAN			PEAKS DB
EALPSWLHWDSQSHTLEGLPLDTDK	122.93	2874.38	25	-1	959.134	98.65	1.0636-1.0916	9241.1	7531.1	4724.9		125.61		2	120355	csf 20k centrifugation 2_Slot2-37_1_5939.d	10	3	3	3	0	1	0	Q14118|DAG1_HUMAN			PEAKS DB
AC(+57.02)TSQGC(+57.02)GKPITEESSTLGEGSK	122.92	2383.06	23	0.6	795.362	39.93	0.9534-0.9815	11520	11172	9523.8	1489.4	1589.8	583.17	2	27828	csf 20k centrifugation 2_Slot2-37_1_5939.d	6	1	1	1	1	1	1	O00533|NCHL1_HUMAN	Carbamidomethylation	C2:Carbamidomethylation:1000.00;C7:Carbamidomethylation:1000.00	PEAKS DB
NTGMETPTGVC(+57.02)AALAAAGVQPHSLDLSHNSLR	122.92	3274.58	32	3.3	819.656	96.24	1.0916-1.1196	0			3525.5	5262.8	0	5	172668	csf EVTRAP 2_Slot2-38_1_5942.d	2	0	0	0	1	1	0	P08571|CD14_HUMAN	Carbamidomethylation	C11:Carbamidomethylation:1000.00	PEAKS DB
IAPLAWINQENLESIDLSYNK	122.9	2430.24	21	0.5	1216.13	101.1	1.3076-1.3353	5757.6	5417.8	5175.8	24017	27303	22630	6	172719	csf EVTRAP 3_Slot2-38_1_5943.d	13	2	2	2	2	3	2	O94769|ECM2_HUMAN			PEAKS DB
LFHTNFYDTVGTIQLINDHVK	122.87	2474.26	21	6.2	825.765	96.87	1.0994-1.1274	335.95	1020.1	348.72	25473	25718	15302	5	175271	csf EVTRAP 2_Slot2-38_1_5942.d	14	1	2	1	3	4	3	P29622|KAIN_HUMAN			PEAKS DB
LDNLQQEIDFLTALYQAELSQMQTQISETNVILSM(+15.99)DNNR	122.87	4542.19	39	-2.9	1515.07	106.61	1.2533-1.2810		0		0	0	0	4	212739	csf EVTRAP 1_Slot2-38_1_5937.d	0	0	0	0	0	0	0	P04264|K2C1_HUMAN	Oxidation (M)	M35:Oxidation (M):155.24	PEAKS DB
RPGGEPSPEGTTGQSYNQYSQR	122.83	2395.08	22	-0.9	799.366	39.03	0.8969-0.9251	19442	19890	16245	63509	56111	56475	6	42983	csf EVTRAP 3_Slot2-38_1_5943.d	7	1	1	1	2	1	1	P02751|FINC_HUMAN			PEAKS DB
RLTHLLGPDWLLDVSHLVAPHAR	122.82	2615.44	23	-1	654.868	99.05	0.9229-0.9511				10565	13664	8325.5	5	184230	csf EVTRAP 2_Slot2-38_1_5942.d	6	0	0	0	2	2	2	Q24JP5|T132A_HUMAN			PEAKS DB
NYHMYVYPVHWQFSELDQHPMDR	122.82	2991.32	23	1.6	748.839	91.09	0.9613-0.9894	6568.7	7039.1	4049.9	1045.6	1244.9	535.61	5	159250	csf EVTRAP 2_Slot2-38_1_5942.d	9	2	2	2	1	1	1	Q14515|SPRL1_HUMAN			PEAKS DB
TLNQPDSQLQLTTGNGLFLSEGLK	122.8	2573.33	24	0.3	1287.67	98.89	1.3707-1.3982	31121	31575	30788	4092	5134.5	3889.6	3	105615	csf 20k centrifugation 3_Slot2-37_1_5940.d	13	2	2	2	3	2	2	P01009|A1AT_HUMAN			PEAKS DB
EANNYEEDPNKPTSWTENQAGK	122.78	2521.1	22	3.3	841.376	47.19	0.9285-0.9567	30504	25986	22936	109880	121720	69316	6	55273	csf EVTRAP 3_Slot2-38_1_5943.d	15	1	2	1	6	3	2	Q8WXD2|SCG3_HUMAN			PEAKS DB
RQEC(+57.02)SIPVC(+57.02)GQDQVTVAMTPR	122.76	2431.14	21	3	811.39	68.75	0.9319-0.9601	15563	19428	14976	1843.5	2352.1	1019.6	2	62977	csf 20k centrifugation 2_Slot2-37_1_5939.d	7	1	1	2	1	1	1	P00734|THRB_HUMAN	Carbamidomethylation	C4:Carbamidomethylation:1000.00;C9:Carbamidomethylation:1000.00	PEAKS DB
NSITLTNLTPGTEYVVSIVALNGREESPLLIGQQSTVSDVPR	122.66	4467.35	42	-0.4	1117.84	102.15	1.3032-1.3309	0	0	0	0	0	0	6	176810	csf EVTRAP 3_Slot2-38_1_5943.d	0	0	0	0	0	0	0	P02751|FINC_HUMAN			PEAKS DB
TPAAETLSQLGQTLQSLK	122.65	1885.02	18	4.5	943.519	99.57	1.2766-1.3043	15811	16555	11488	44798	47428	32325	5	186342	csf EVTRAP 2_Slot2-38_1_5942.d	17	3	3	2	3	3	3	Q15818|NPTX1_HUMAN			PEAKS DB
DTLMISRTPEVTC(+57.02)VVVDVSHEDPEVQFK	122.53	3229.56	28	2.5	808.4	97.64	1.0220-1.0501				35923	25500	20816	5	178336	csf EVTRAP 2_Slot2-38_1_5942.d	6	0	0	0	2	2	2	P01860|IGHG3_HUMAN	Carbamidomethylation	C13:Carbamidomethylation:1000.00	PEAKS DB
MFQNFPTELLLSLAVEPLTANFHK	122.52	2759.44	24	2.1	920.821	105.78	1.1676-1.1955	0	0		4952.7	6091.8	6330.2	5	209761	csf EVTRAP 2_Slot2-38_1_5942.d	3	0	0	0	1	1	1	Q92820|GGH_HUMAN			PEAKS DB
C(+57.02)PGC(+57.02)GQGVQAGC(+57.02)PGGC(+57.02)VEEEDGGSPAEGC(+57.02)AEAEGC(+57.02)LRR	122.46	3979.57	38	2.5	995.902	58.21	1.1117-1.1397	0	0	1846.4	99701	141420	87290	5	86761	csf EVTRAP 2_Slot2-38_1_5942.d	5	0	0	1	2	1	1	P24592|IBP6_HUMAN	Carbamidomethylation	C1:Carbamidomethylation:1000.00;C4:Carbamidomethylation:1000.00;C12:Carbamidomethylation:1000.00;C16:Carbamidomethylation:1000.00;C29:Carbamidomethylation:1000.00;C35:Carbamidomethylation:1000.00	PEAKS DB
PIIIPQTISELQLSVSAGSPHPAIAR	122.45	2694.51	26	-1.3	899.175	103.02	1.1520-1.1799				26296	20981	12739	5	200123	csf EVTRAP 2_Slot2-38_1_5942.d	6	0	0	0	2	2	2	P0C0L5|CO4B_HUMAN:P0C0L4|CO4A_HUMAN			PEAKS DB
VVSVLTVLHQDWLNGK	122.45	1807	16	1.6	904.508	99.2	1.2211-1.2488	85537	90372	66952	511300	531330	509160	5	184541	csf EVTRAP 2_Slot2-38_1_5942.d	28	2	2	2	7	7	8	P0DOX5|IGG1_HUMAN:P01861|IGHG4_HUMAN:P01860|IGHG3_HUMAN			PEAKS DB
C(+57.02)PM(+15.99)IPC(+57.02)YISSPDEC(+57.02)LWMDWVTEK	122.36	2932.23	23	-4.1	978.412	102.13	1.0175-1.0456	0			3184.1	7602	6896.2	5	196711	csf EVTRAP 2_Slot2-38_1_5942.d	5	0	0	0	1	2	2	P16035|TIMP2_HUMAN	Carbamidomethylation; Oxidation (M)	C1:Carbamidomethylation:1000.00;M3:Oxidation (M):259.95;C6:Carbamidomethylation:1000.00;C14:Carbamidomethylation:1000.00	PEAKS DB
WQQGNVFSC(+57.02)SVMHEALHNHYTQK	122.3	2800.26	23	2.6	701.074	72.89	0.9409-0.9691	42925	46766	35299	638650	563940	492270	6	102065	csf EVTRAP 3_Slot2-38_1_5943.d	38	3	3	3	12	11	6	P0DOX5|IGG1_HUMAN:P01859|IGHG2_HUMAN	Carbamidomethylation	C9:Carbamidomethylation:1000.00	PEAKS DB
SYSC(+57.02)QVTHEGSTVEK	122.25	1710.75	15	1.8	856.385	29.86	1.1207-1.1486	135010	135510	119200	1498400	1584700	1257500	6	29146	csf EVTRAP 3_Slot2-38_1_5943.d	56	2	2	2	19	16	15	P0DOX8|IGL1_HUMAN:P0DOY2|IGLC2_HUMAN	Carbamidomethylation	C4:Carbamidomethylation:1000.00	PEAKS DB
MPYEC(+57.02)GPSLDVC(+57.02)AQDERSK	122.17	2240.95	19	2.5	747.992	61.47	0.9804-1.0085				52051	48951	35839	5	93141	csf EVTRAP 2_Slot2-38_1_5942.d	5	0	0	0	2	1	2	P10643|CO7_HUMAN	Carbamidomethylation	C5:Carbamidomethylation:1000.00;C12:Carbamidomethylation:1000.00	PEAKS DB
NC(+57.02)PGAEVPEGEC(+57.02)C(+57.02)PVC(+57.02)PDGSESPTDQETTGVEGPK	122.13	3745.51	35	1.3	1249.51	64.63	1.1061-1.1341	740.36	1547.7	178.83	22338	21639	22272	4	97222	csf EVTRAP 1_Slot2-38_1_5937.d	6	1	1	1	1	1	1	P02452|CO1A1_HUMAN	Carbamidomethylation	C2:Carbamidomethylation:1000.00;C12:Carbamidomethylation:1000.00;C13:Carbamidomethylation:1000.00;C16:Carbamidomethylation:1000.00	PEAKS DB
DSEC(+57.02)C(+57.02)GDQLC(+57.02)VWGHC(+57.02)TK	122.11	2110.8	17	1.6	704.607	60.77	0.9263-0.9545	162450	191630	149970	938.17	922.29	640.22	2	51609	csf 20k centrifugation 2_Slot2-37_1_5939.d	12	3	3	3	1	1	1	Q9UBP4|DKK3_HUMAN	Carbamidomethylation	C4:Carbamidomethylation:1000.00;C5:Carbamidomethylation:1000.00;C10:Carbamidomethylation:1000.00;C15:Carbamidomethylation:1000.00	PEAKS DB
NPSSAGSWNSGSSGPGSTGNR	122.05	1962.84	21	0	982.428	35.48	1.0871-1.1151	185.85	0	0	13595	11729	7193	6	37848	csf EVTRAP 3_Slot2-38_1_5943.d	4	1	0	0	1	1	1	P02671|FIBA_HUMAN			PEAKS DB
SYGGGSGGGFSASSLGGGFGGGSR	122.01	2021.88	24	2.9	1011.95	72.6	1.1497-1.1776	8242.4	10265	6702.9	60403	53526	57854	6	101492	csf EVTRAP 3_Slot2-38_1_5943.d	8	1	1	1	1	1	3	P35527|K1C9_HUMAN			PEAKS DB
C(+57.02)DPVDQC(+57.02)QDSETGTFYQIGDSWEK	121.99	2864.15	24	0.3	1433.08	90.31	1.3696-1.3971	2009.9	1869.8	2418.4	24428	26840	37749	6	139189	csf EVTRAP 3_Slot2-38_1_5943.d	20	2	1	2	4	5	6	P02751|FINC_HUMAN	Carbamidomethylation	C1:Carbamidomethylation:1000.00;C7:Carbamidomethylation:1000.00	PEAKS DB
IYPTVNC(+57.02)QPLGMISLMK	121.96	1963.99	17	2.5	983.006	99.84	1.1966-1.2244	42852	41009	37382	7830.5	9730.2	19634	2	124464	csf 20k centrifugation 2_Slot2-37_1_5939.d	15	3	3	3	2	2	2	P01042|KNG1_HUMAN	Carbamidomethylation	C7:Carbamidomethylation:1000.00	PEAKS DB
NSVTSLLSIINDLLEQLGQLDTVDLNK	121.81	2954.58	27	1.6	985.869	108.7	1.0658-1.0938				2542.1	1844.9	1457.7	6	194655	csf EVTRAP 3_Slot2-38_1_5943.d	3	0	0	0	1	1	1	P11047|LAMC1_HUMAN			PEAKS DB
TLSLPELEQQQEQQQEQQQEQVQMLAPLES	121.77	3536.69	30	2.5	1179.91	100.37	1.1129-1.1408	31303	39838	33856	13790	6625.9	35622	6	169814	csf EVTRAP 3_Slot2-38_1_5943.d	6	1	1	1	1	1	1	P06727|APOA4_HUMAN			PEAKS DB
C(+57.02)VNVIFVGDHGMEDVTC(+57.02)DRTEFLSNYLTNVDDITLVPGTLGR	121.7	4741.25	42	8.8	1186.33	101.77	1.1598-1.1877		0		0		0	6	175370	csf EVTRAP 3_Slot2-38_1_5943.d	0	0	0	0	0	0	0	Q13822|ENPP2_HUMAN	Carbamidomethylation	C1:Carbamidomethylation:1000.00;C17:Carbamidomethylation:1000.00	PEAKS DB
DRC(+57.02)GEVRNEENAC(+57.02)HC(+57.02)SEDC(+57.02)LAR	121.6	2736.09	22	4.5	685.032	32.38	0.9105-0.9387	112.36	169.34	226.02	135700	145490	99175	5	37480	csf EVTRAP 2_Slot2-38_1_5942.d	15	1	1	1	4	4	4	Q13822|ENPP2_HUMAN	Carbamidomethylation	C3:Carbamidomethylation:1000.00;C13:Carbamidomethylation:1000.00;C15:Carbamidomethylation:1000.00;C19:Carbamidomethylation:1000.00	PEAKS DB
M(+15.99)SGEC(+57.02)APNVSVSVSTSHTTISGGGSR	121.59	2580.15	26	1	861.06	54.95	0.9962-1.0243	15046	30409	15288	35774	40260	25296	5	79244	csf EVTRAP 2_Slot2-38_1_5942.d	8	1	1	2	2	1	1	P04264|K2C1_HUMAN	Oxidation (M); Carbamidomethylation	M1:Oxidation (M):1000.00;C5:Carbamidomethylation:1000.00	PEAKS DB
TLLVFEVQQPFLFVLWDQQHK	121.57	2614.39	21	2.8	872.475	104.83	1.1196-1.1475	0	1229.4	324.38	67372	59145	46175	6	185688	csf EVTRAP 3_Slot2-38_1_5943.d	10	0	1	1	3	2	3	P05155|IC1_HUMAN			PEAKS DB
DTMADGPWDSPALILELEDAVR	121.53	2413.15	22	0.5	1207.58	105.27	1.2688-1.2966	11014	8214.6	8656.1				2	138021	csf 20k centrifugation 2_Slot2-37_1_5939.d	10	3	4	3	0	0	0	O95502|NPTXR_HUMAN			PEAKS DB
GIEVSSSELGMTFTGVDTMASYEEVLHLLR	121.52	3270.58	30	-0.9	1091.2	103.61	1.2333-1.2611	565.26	7721.5	2000	43183	81073	67112	5	202137	csf EVTRAP 2_Slot2-38_1_5942.d	21	1	1	1	5	5	8	O94985|CSTN1_HUMAN			PEAKS DB
GEQHGSSSGSSSSYGQHGSGSR	121.47	2121.87	22	-1.8	708.296	9.66	0.9071-0.9353	1785.7	1052.7	561.66	6480.9	5960.6	4897.2	6	2403	csf EVTRAP 3_Slot2-38_1_5943.d	11	2	2	1	2	2	2	Q86YZ3|HORN_HUMAN			PEAKS DB
LDDDLEHQGGHVLDHGHK	121.43	2020.94	18	1.9	674.654	37.77	0.8980-0.9263		108.48	0	15315	19756	9982.2	5	46842	csf EVTRAP 2_Slot2-38_1_5942.d	7	0	1	0	2	2	2	P01042|KNG1_HUMAN			PEAKS DB
HLMSFLTMMGPSPDWNVGLSAEDLC(+57.02)TK	121.4	3036.39	27	0.4	1013.14	101.86	1.0602-1.0882				6406.7	5875.9	3892.7	4	195762	csf EVTRAP 1_Slot2-38_1_5937.d	3	0	0	0	1	1	1	Q9HCB6|SPON1_HUMAN	Carbamidomethylation	C25:Carbamidomethylation:1000.00	PEAKS DB
AFQTVVLDPEGDAQIDPNWVVLNQGR	121.4	2880.44	26	-1.3	961.153	100.13	1.0411-1.0692	273.6	383.25	209.32	0	0	5916.4	6	168988	csf EVTRAP 3_Slot2-38_1_5943.d	5	1	1	1	0	0	2	P49747|COMP_HUMAN			PEAKS DB
ELSAERPLNEQIAEAEEDK	121.37	2170.04	19	1.4	724.355	66.51	0.8901-0.9184	42895	48622	42524	249390	218680	209320	6	89865	csf EVTRAP 3_Slot2-38_1_5943.d	28	3	3	4	7	5	6	Q8WXD2|SCG3_HUMAN			PEAKS DB
C(+57.02)TTDFVSLTSHLNSAVDGFDSEFC(+57.02)K	121.34	2836.23	25	1	946.419	99.46	1.0310-1.0591	529.72	1178.1	889.82	1768.8	2413.8	2460.7	5	185894	csf EVTRAP 2_Slot2-38_1_5942.d	9	1	1	1	2	2	2	Q6NW40|RGMB_HUMAN	Carbamidomethylation	C1:Carbamidomethylation:1000.00;C24:Carbamidomethylation:1000.00	PEAKS DB
SVSVVETDYDQYALLYSQGSK	121.34	2351.12	21	0.1	1176.57	94.47	1.3021-1.3298	117500	138340	117320	424880	398320	468170	4	168315	csf EVTRAP 1_Slot2-38_1_5937.d	112	8	6	4	32	35	27	P41222|PTGDS_HUMAN			PEAKS DB
HQLYIDETVNSNIPTNLRVLRSILENLRSK	121.33	3534.93	30	-2.5	707.991	100.25	0.9432-0.9714	3002.1	0		31404	23403	28032	5	188932	csf EVTRAP 2_Slot2-38_1_5942.d	5	1	0	0	1	1	2	P02675|FIBB_HUMAN			PEAKS DB
EQNYSDDVLANMISEPR	121.18	1979.89	17	2.8	990.955	93.61	1.1743-1.2021	41297	39546	24820	381670	371110	332200	6	147452	csf EVTRAP 3_Slot2-38_1_5943.d	24	2	3	2	5	7	5	P05067|A4_HUMAN			PEAKS DB
YSDMQWAIDNFYLGPGC(+57.02)LDNC(+57.02)R	121.14	2694.13	22	-1.8	899.049	101.24	0.9770-1.0052	1158.6	783.79	469.37	11235	11347	8512.8	6	173329	csf EVTRAP 3_Slot2-38_1_5943.d	12	2	2	2	2	2	2	P78509|RELN_HUMAN	Carbamidomethylation	C17:Carbamidomethylation:1000.00;C21:Carbamidomethylation:1000.00	PEAKS DB
VFDEFKPLVEEPQNLIK	121.13	2044.09	17	-6.4	682.366	97.82	0.8788-0.9071	986870	1078400	951170	442850	441900	409790	2	116437	csf 20k centrifugation 2_Slot2-37_1_5939.d	60	15	17	15	5	5	3	P02768|ALBU_HUMAN			PEAKS DB
QIVAGVNYFLDVELGR	121.13	1791.95	16	3.3	896.986	101.35	1.1374-1.1654	280790	232650	261040	600370	635350	647340	6	174184	csf EVTRAP 3_Slot2-38_1_5943.d	71	12	10	8	14	14	13	P01034|CYTC_HUMAN			PEAKS DB
DVVQITC(+57.02)LDGFEVVEGR	121.05	1934.94	17	2.3	968.48	99.39	1.1553-1.1832	2758.2	6886.3	4717.7	1245.3	523.06	6370	6	165965	csf EVTRAP 3_Slot2-38_1_5943.d	10	1	1	1	1	1	5	P09871|C1S_HUMAN	Carbamidomethylation	C7:Carbamidomethylation:1000.00	PEAKS DB
GESHWVDDDC(+57.02)EEIK	121.04	1717.69	14	0.2	573.57	47.61	0.8300-0.8584	757.21	1564.3	832.64	379860	432510	279780	5	64324	csf EVTRAP 2_Slot2-38_1_5942.d	24	1	2	1	7	7	6	Q13822|ENPP2_HUMAN	Carbamidomethylation	C10:Carbamidomethylation:1000.00	PEAKS DB
RPC(+57.02)GHPGDTPFGTFTLTGGNVFEYGVK	120.98	2910.38	27	0.9	971.133	97.01	1.0467-1.0748	10794	8891.3	7855.4	24161	22619	23080	5	175743	csf EVTRAP 2_Slot2-38_1_5942.d	18	3	4	3	3	2	3	P08603|CFAH_HUMAN	Carbamidomethylation	C3:Carbamidomethylation:1000.00	PEAKS DB
DEC(+57.02)ESGIHNC(+57.02)LPDFIC(+57.02)QNTLGSFR	120.93	2868.23	24	-0.4	957.082	98.7	1.0164-1.0445				1174.3	1063.5	500.22	5	182812	csf EVTRAP 2_Slot2-38_1_5942.d	3	0	0	0	1	1	1	P23142|FBLN1_HUMAN	Carbamidomethylation	C3:Carbamidomethylation:1000.00;C10:Carbamidomethylation:1000.00;C16:Carbamidomethylation:1000.00	PEAKS DB
[truncated: 25,965 more rows]
