# Supplementary material for: Phosphoproteome analysis of cerebrospinal fluid extracellular vesicles in primary central nervous system lymphoma
Source: Royal Society of Chemistry journal article supplement (doi:10.1039/d3an00670k), 2023-01-01
Supplement: d3an00670k2.zip [file S3-EVTRAP based phosphoproteome in PCNSL and Control.xlsx]

## Sheet: phosphoprotein
Protein Group	Protein ID	Accession	-10lgP	Coverage (%)	Coverage (%) Sample 1	Coverage (%) Sample 2	Coverage (%) Sample 3	Coverage (%) Sample 4	Coverage (%) Sample 5	Coverage (%) Sample 6	Area Sample C1	Area Sample C2	Area Sample C3	Area Sample P1	Area Sample P2	Area Sample P3	#Peptides	#Unique	#Spec Sample 1	#Spec Sample 2	#Spec Sample 3	#Spec Sample 4	#Spec Sample 5	#Spec Sample 6	PTM	Avg. Mass	Description
18	25	P04114|APOB_HUMAN	523.55	54	12	15	46	51	18	30	8420	15400	218000	170000	11900	47100	231	231	79	114	859	679	124	280	Carbamidomethylation; Oxidation (M); Acetylation (Protein N-term); Phosphorylation (STY)	515611	Apolipoprotein B-100 OS=Homo sapiens OX=9606 GN=APOB PE=1 SV=2
7	31	P02751|FINC_HUMAN	500.95	65	43	43	53	61	44	49	266000	204000	453000	697000	217000	292000	115	115	602	543	891	1278	533	692	Carbamidomethylation; Oxidation (M); Acetylation (Protein N-term); Phosphorylation (STY)	262622	Fibronectin OS=Homo sapiens OX=9606 GN=FN1 PE=1 SV=4
9	17	P01024|CO3_HUMAN	493.34	75	54	56	63	74	58	57	81700	94200	161000	475000	88700	132000	118	118	338	352	514	964	386	417	Carbamidomethylation; Oxidation (M); Acetylation (Protein N-term); Phosphorylation (STY)	187147	Complement C3 OS=Homo sapiens OX=9606 GN=C3 PE=1 SV=2
34	26	P05067|A4_HUMAN	469.37	57	41	40	52	54	40	49	45800	45500	55800	163000	34900	56200	39	37	174	189	191	370	156	180	Carbamidomethylation; Oxidation (M); Acetylation (Protein N-term); Phosphorylation (STY)	86943	Amyloid-beta precursor protein OS=Homo sapiens OX=9606 GN=APP PE=1 SV=3
4	7	P02768|ALBU_HUMAN	447.93	85	81	79	81	85	82	81	317000	395000	377000	1190000	365000	419000	66	66	660	711	724	1603	684	748	Carbamidomethylation; Oxidation (M); Acetylation (Protein N-term); Phosphorylation (STY)	69367	Serum albumin OS=Homo sapiens OX=9606 GN=ALB PE=1 SV=2
13	24	P08603|CFAH_HUMAN	439.32	68	57	58	61	61	60	61	58100	51900	227000	454000	69500	118000	86	72	297	284	663	909	316	436	Carbamidomethylation; Oxidation (M); Acetylation (Protein N-term); Phosphorylation (STY)	139096	Complement factor H OS=Homo sapiens OX=9606 GN=CFH PE=1 SV=4
16	12	P02671|FIBA_HUMAN	433.29	61	47	46	59	52	40	49	83300	55600	253000	256000	82800	111000	57	57	286	248	618	580	308	332	Carbamidomethylation; Oxidation (M); Acetylation (Protein N-term); Phosphorylation (STY)	94973	Fibrinogen alpha chain OS=Homo sapiens OX=9606 GN=FGA PE=1 SV=2
21	14	P23142|FBLN1_HUMAN	429.9	66	40	35	47	55	41	37	78100	78800	97600	286000	111000	150000	40	40	241	223	250	469	216	340	Carbamidomethylation; Oxidation (M); Acetylation (Protein N-term); Phosphorylation (STY)	77214	Fibulin-1 OS=Homo sapiens OX=9606 GN=FBLN1 PE=1 SV=4
23	30	P0C0L4|CO4A_HUMAN	429.74	65	40	39	46	64	44	42	215	267	426	2450	234	568	97	4	181	190	224	594	226	249	Carbamidomethylation; Oxidation (M); Acetylation (Protein N-term); Phosphorylation (STY)	192784	Complement C4-A OS=Homo sapiens OX=9606 GN=C4A PE=1 SV=2
1	19	P05060|SCG1_HUMAN	427.93	65	55	52	49	60	48	54	984000	700000	636000	578000	415000	646000	66	66	1384	1217	1064	1101	852	1083	Carbamidomethylation; Oxidation (M); Acetylation (Protein N-term); Phosphorylation (STY)	78276	Secretogranin-1 OS=Homo sapiens OX=9606 GN=CHGB PE=1 SV=2
25	29	P0C0L5|CO4B_HUMAN	425.45	64	40	39	45	63	44	41	344	323	673	5690	216	1080	96	3	178	187	220	596	220	244	Carbamidomethylation; Oxidation (M); Acetylation (Protein N-term); Phosphorylation (STY)	192750	Complement C4-B OS=Homo sapiens OX=9606 GN=C4B PE=1 SV=2
43	22	P02748|CO9_HUMAN	411.11	64	43	41	44	56	51	47	21700	16300	48200	96300	32200	31400	40	39	149	120	214	247	173	166	Carbamidomethylation; Oxidation (M); Phosphorylation (STY)	63173	Complement component C9 OS=Homo sapiens OX=9606 GN=C9 PE=1 SV=2
57	10	P13671|CO6_HUMAN	388.19	62	50	38	59	57	47	54	7950	4060	36500	51900	8510	15600	46	46	97	79	188	176	83	107	Carbamidomethylation; Oxidation (M); Acetylation (Protein N-term); Phosphorylation (STY)	104786	Complement component C6 OS=Homo sapiens OX=9606 GN=C6 PE=1 SV=3
44	18	P10643|CO7_HUMAN	376.35	66	52	51	50	60	61	55	14900	18500	17200	166000	22100	38300	53	53	92	122	102	382	143	174	Carbamidomethylation; Oxidation (M); Acetylation (Protein N-term); Phosphorylation (STY)	93518	Complement component C7 OS=Homo sapiens OX=9606 GN=C7 PE=1 SV=2
20	9	P06396|GELS_HUMAN	374.55	79	65	49	69	77	64	61	61300	78300	68900	418000	84500	151000	53	53	234	245	262	741	283	352	Carbamidomethylation; Oxidation (M); Acetylation (Protein N-term); Phosphorylation (STY)	85697	Gelsolin OS=Homo sapiens OX=9606 GN=GSN PE=1 SV=1
24	8	P06727|APOA4_HUMAN	371.08	82	80	80	79	82	80	80	70200	77400	75200	355000	92400	124000	43	43	223	251	220	496	225	300	Oxidation (M); Acetylation (Protein N-term); Phosphorylation (STY)	45399	Apolipoprotein A-IV OS=Homo sapiens OX=9606 GN=APOA4 PE=1 SV=3
5	6	P02647|APOA1_HUMAN	370.84	85	79	79	85	83	81	79	360000	346000	590000	1100000	393000	517000	45	45	582	535	900	1494	611	749	Oxidation (M); Acetylation (Protein N-term); Phosphorylation (STY)	30778	Apolipoprotein A-I OS=Homo sapiens OX=9606 GN=APOA1 PE=1 SV=1
2	23	P01042|KNG1_HUMAN	369.79	57	34	34	52	53	40	39	624000	361000	541000	418000	446000	218000	38	38	1096	651	1847	921	928	983	Carbamidomethylation; Oxidation (M); Phosphorylation (STY)	71957	Kininogen-1 OS=Homo sapiens OX=9606 GN=KNG1 PE=1 SV=2
6	4	P02649|APOE_HUMAN	367.65	89	79	77	83	89	81	77	370000	355000	465000	1170000	408000	573000	49	49	654	620	714	1399	636	836	Carbamidomethylation; Oxidation (M); Acetylation (Protein N-term); Phosphorylation (STY)	36154	Apolipoprotein E OS=Homo sapiens OX=9606 GN=APOE PE=1 SV=1
28	1	P02675|FIBB_HUMAN	367.17	78	59	54	73	73	64	65	60500	41900	161000	233000	52400	67400	37	37	150	106	396	445	146	180	Carbamidomethylation; Oxidation (M); Acetylation (Protein N-term); Phosphorylation (STY)	55928	Fibrinogen beta chain OS=Homo sapiens OX=9606 GN=FGB PE=1 SV=2
53	28	Q13822|ENPP2_HUMAN	366.33	56	38	38	42	56	46	45	9930	15700	19100	108000	16800	22600	49	49	77	104	88	288	123	106	Carbamidomethylation; Oxidation (M); Acetylation (Protein N-term); Phosphorylation (STY)	98994	Ectonucleotide pyrophosphatase/phosphodiesterase family member 2 OS=Homo sapiens OX=9606 GN=ENPP2 PE=1 SV=3
35	15	P35527|K1C9_HUMAN	365.32	79	46	48	57	60	59	48	23400	29600	84000	124000	32000	41800	42	41	120	147	332	299	158	154	Carbamidomethylation; Oxidation (M); Acetylation (Protein N-term); Phosphorylation (STY)	62064	Keratin type I cytoskeletal 9 OS=Homo sapiens OX=9606 GN=KRT9 PE=1 SV=3
33	13	P02679|FIBG_HUMAN	364.05	77	73	69	70	77	67	69	60300	44800	161000	218000	55700	73100	33	33	162	115	321	395	119	160	Carbamidomethylation; Oxidation (M); Acetylation (Protein N-term); Phosphorylation (STY)	51512	Fibrinogen gamma chain OS=Homo sapiens OX=9606 GN=FGG PE=1 SV=3
82	74	P22105|TENX_HUMAN	362.75	26	7	7	9	22	7	13	16200	16900	23700	43900	12700	48100	79	79	41	56	54	166	43	110	Carbamidomethylation; Acetylation (Protein N-term); Phosphorylation (STY)	458392	Tenascin-X OS=Homo sapiens OX=9606 GN=TNXB PE=1 SV=5
80	53	P35555|FBN1_HUMAN	358.95	31	9	10	14	22	9	16	16700	11500	18500	22300	13700	19200	61	58	74	67	83	108	73	91	Carbamidomethylation; Oxidation (M); Acetylation (Protein N-term); Phosphorylation (STY)	312297	Fibrillin-1 OS=Homo sapiens OX=9606 GN=FBN1 PE=1 SV=4
27	45	P04264|K2C1_HUMAN	358.22	77	47	54	58	74	69	61	34200	49600	91500	168000	47300	56700	63	53	175	243	302	435	224	230	Carbamidomethylation; Oxidation (M); Acetylation (Protein N-term); Phosphorylation (STY)	66039	Keratin type II cytoskeletal 1 OS=Homo sapiens OX=9606 GN=KRT1 PE=1 SV=6
55	46	Q14515|SPRL1_HUMAN	356.75	54	34	37	30	53	39	36	40000	63900	10400	39700	38700	46600	31	31	137	165	53	168	132	152	Carbamidomethylation; Oxidation (M); Acetylation (Protein N-term); Phosphorylation (STY)	75208	SPARC-like protein 1 OS=Homo sapiens OX=9606 GN=SPARCL1 PE=1 SV=2
93	54	P07358|CO8B_HUMAN	355.14	57	31	30	48	51	49	33	4030	15400	23200	22000	5230	7180	28	28	31	35	102	98	53	40	Carbamidomethylation; Oxidation (M); Acetylation (Protein N-term); Phosphorylation (STY)	67047	Complement component C8 beta chain OS=Homo sapiens OX=9606 GN=C8B PE=1 SV=3
146	42	P98160|PGBM_HUMAN	348.22	25	4	4	5	20	5	8	1130	393	452	12100	851	2620	72	72	14	19	17	131	21	42	Carbamidomethylation; Oxidation (M); Phosphorylation (STY)	468835	Basement membrane-specific heparan sulfate proteoglycan core protein OS=Homo sapiens OX=9606 GN=HSPG2 PE=1 SV=4
31	43	P19823|ITIH2_HUMAN	348.18	42	22	22	37	40	23	21	121000	102000	276000	137000	120000	67000	37	37	177	201	406	309	176	203	Carbamidomethylation; Oxidation (M); Acetylation (Protein N-term); Phosphorylation (STY)	106463	Inter-alpha-trypsin inhibitor heavy chain H2 OS=Homo sapiens OX=9606 GN=ITIH2 PE=1 SV=2
78	40	P19021|AMD_HUMAN	346.87	44	23	13	10	40	20	20	46100	13700	21100	35300	41100	43000	36	36	79	61	60	123	76	83	Carbamidomethylation; Oxidation (M); Acetylation (Protein N-term); Phosphorylation (STY)	108332	Peptidyl-glycine alpha-amidating monooxygenase OS=Homo sapiens OX=9606 GN=PAM PE=1 SV=2
3	249	P10451|OSTP_HUMAN	344.78	66	58	51	49	63	61	58	722000	751000	579000	1060000	1090000	1690000	29	29	896	897	721	1200	1157	1625	Oxidation (M); Acetylation (Protein N-term); Phosphorylation (STY)	35423	Osteopontin OS=Homo sapiens OX=9606 GN=SPP1 PE=1 SV=1
32	38	O94769|ECM2_HUMAN	342.73	57	32	30	32	50	39	33	164000	148000	116000	153000	150000	192000	42	42	259	321	168	262	243	266	Carbamidomethylation; Oxidation (M); Acetylation (Protein N-term); Phosphorylation (STY)	79789	Extracellular matrix protein 2 OS=Homo sapiens OX=9606 GN=ECM2 PE=2 SV=1
170	66	P24043|LAMA2_HUMAN	342.15	28	6	6	5	22	5	12	420	815	846	23100	1050	1660	69	69	18	25	18	100	10	34	Carbamidomethylation; Acetylation (Protein N-term); Phosphorylation (STY)	343906	Laminin subunit alpha-2 OS=Homo sapiens OX=9606 GN=LAMA2 PE=1 SV=4
90	72	P12259|FA5_HUMAN	341.38	33	11	12	12	32	15	15	2380	2410	3080	30500	3390	11000	63	63	41	39	36	163	54	66	Carbamidomethylation; Oxidation (M); Acetylation (Protein N-term); Phosphorylation (STY)	251701	Coagulation factor V OS=Homo sapiens OX=9606 GN=F5 PE=1 SV=4
71	34	P13645|K1C10_HUMAN	340.51	66	45	45	57	60	46	49	7890	7930	22500	63000	11200	11400	39	32	51	54	99	190	76	73	Carbamidomethylation; Oxidation (M); Acetylation (Protein N-term); Phosphorylation (STY)	58827	Keratin type I cytoskeletal 10 OS=Homo sapiens OX=9606 GN=KRT10 PE=1 SV=6
40	33	P00751|CFAB_HUMAN	337.31	48	39	36	43	43	38	41	55900	45600	86800	204000	45400	69300	41	41	156	125	199	279	126	170	Carbamidomethylation; Acetylation (Protein N-term); Phosphorylation (STY)	85533	Complement factor B OS=Homo sapiens OX=9606 GN=CFB PE=1 SV=2
123	73	P12111|CO6A3_HUMAN	337.1	30	6	6	8	27	8	10	1010	933	1770	17800	876	6000	76	76	20	26	32	134	28	49	Carbamidomethylation; Oxidation (M); Acetylation (Protein N-term); Phosphorylation (STY)	343668	Collagen alpha-3(VI) chain OS=Homo sapiens OX=9606 GN=COL6A3 PE=1 SV=5
52	39	P09871|C1S_HUMAN	335.16	59	35	35	45	59	45	45	17000	17500	35800	123000	24200	40300	32	32	72	83	131	286	101	123	Carbamidomethylation; Oxidation (M); Phosphorylation (STY)	76685	Complement C1s subcomponent OS=Homo sapiens OX=9606 GN=C1S PE=1 SV=1
8	32	P10909|CLUS_HUMAN	334.43	60	51	51	51	59	50	52	247000	214000	204000	803000	259000	329000	34	34	433	409	385	1015	435	580	Carbamidomethylation; Oxidation (M); Acetylation (Protein N-term); Phosphorylation (STY)	52495	Clusterin OS=Homo sapiens OX=9606 GN=CLU PE=1 SV=1
38	101	P18065|IBP2_HUMAN	331.79	79	75	73	70	77	73	74	8700	9560	28300	110000	12800	31200	28	28	151	133	243	376	171	260	Carbamidomethylation; Oxidation (M); Acetylation (Protein N-term); Phosphorylation (STY)	34814	Insulin-like growth factor-binding protein 2 OS=Homo sapiens OX=9606 GN=IGFBP2 PE=1 SV=2
17	124	P0DOX5|IGG1_HUMAN	330.11	62	55	46	49	53	49	47	73600	63500	147000	295000	85900	108000	26	14	307	309	373	727	298	310	Carbamidomethylation; Oxidation (M); Phosphorylation (STY)	49329	Immunoglobulin gamma-1 heavy chain OS=Homo sapiens OX=9606 PE=1 SV=2
17	130	P01857|IGHG1_HUMAN	330.11	72	68	58	66	72	67	64	73500	63500	147000	295000	85900	108000	24	12	306	308	373	727	298	310	Carbamidomethylation; Oxidation (M); Phosphorylation (STY)	36106	Immunoglobulin heavy constant gamma 1 OS=Homo sapiens OX=9606 GN=IGHG1 PE=1 SV=1
119	41	P35579|MYH9_HUMAN	329.42	31	11	12	12	24	20	18	2320	2380	16700	9520	10900	9790	49	41	43	42	30	77	69	64	Carbamidomethylation; Oxidation (M); Acetylation (Protein N-term); Phosphorylation (STY)	226530	Myosin-9 OS=Homo sapiens OX=9606 GN=MYH9 PE=1 SV=4
79	51	P07900|HS90A_HUMAN	328.31	50	19	23	28	39	27	34	22800	19100	50000	48400	44000	74700	37	27	53	63	100	133	76	110	Carbamidomethylation; Oxidation (M); Acetylation (Protein N-term); Phosphorylation (STY)	84660	Heat shock protein HSP 90-alpha OS=Homo sapiens OX=9606 GN=HSP90AA1 PE=1 SV=5
65	37	P00736|C1R_HUMAN	326.56	54	47	44	49	53	48	50	3890	1970	13300	74700	8030	15700	34	32	57	50	95	215	88	112	Carbamidomethylation; Oxidation (M); Phosphorylation (STY)	80119	Complement C1r subcomponent OS=Homo sapiens OX=9606 GN=C1R PE=1 SV=2
142	84	P35442|TSP2_HUMAN	325.07	29	18	14	12	24	12	18	8850	4090	2070	7030	3020	7520	28	27	42	43	31	45	27	42	Carbamidomethylation; Acetylation (Protein N-term); Phosphorylation (STY)	129991	Thrombospondin-2 OS=Homo sapiens OX=9606 GN=THBS2 PE=1 SV=2
76	44	P35908|K22E_HUMAN	324.89	77	33	44	43	72	36	57	1640	2780	6570	19600	2080	3790	47	33	43	79	78	149	62	58	Carbamidomethylation; Oxidation (M); Acetylation (Protein N-term); Phosphorylation (STY)	65433	Keratin type II cytoskeletal 2 epidermal OS=Homo sapiens OX=9606 GN=KRT2 PE=1 SV=2
109	52	P12109|CO6A1_HUMAN	324.21	53	18	18	23	49	23	29	3400	1750	2940	43700	4410	5820	45	45	31	30	27	136	42	39	Carbamidomethylation; Oxidation (M); Acetylation (Protein N-term); Phosphorylation (STY)	108529	Collagen alpha-1(VI) chain OS=Homo sapiens OX=9606 GN=COL6A1 PE=1 SV=3
26	11	Q8WXD2|SCG3_HUMAN	324.16	76	64	60	64	74	64	66	273000	217000	131000	286000	187000	294000	43	43	299	347	220	435	272	318	Oxidation (M); Acetylation (Protein N-term); Phosphorylation (STY)	53005	Secretogranin-3 OS=Homo sapiens OX=9606 GN=SCG3 PE=1 SV=3
94	50	P07357|CO8A_HUMAN	319.61	67	34	32	58	54	43	35	86200	75100	10300	21000	80500	9300	30	30	55	48	103	93	51	52	Carbamidomethylation; Oxidation (M); Acetylation (Protein N-term); Phosphorylation (STY)	65163	Complement component C8 alpha chain OS=Homo sapiens OX=9606 GN=C8A PE=1 SV=2
89	20	P00450|CERU_HUMAN	319.48	46	24	25	22	46	28	26	5670	12400	11800	39100	9820	10100	38	38	40	51	56	133	55	55	Carbamidomethylation; Oxidation (M); Phosphorylation (STY)	122205	Ceruloplasmin OS=Homo sapiens OX=9606 GN=CP PE=1 SV=1
128	60	Q8N2S1|LTBP4_HUMAN	318.37	35	17	18	9	33	16	19	708	1160	1200	16400	1390	3680	47	47	32	39	17	123	30	45	Carbamidomethylation; Oxidation (M); Acetylation (Protein N-term); Phosphorylation (STY)	173435	Latent-transforming growth factor beta-binding protein 4 OS=Homo sapiens OX=9606 GN=LTBP4 PE=1 SV=2
50	3	P63261|ACTG_HUMAN	318.02	91	67	65	62	90	90	82	152	138	124	1250	381	137	32	1	95	91	79	255	172	135	Carbamidomethylation; Oxidation (M); Acetylation (Protein N-term); Phosphorylation (STY)	41793	Actin cytoplasmic 2 OS=Homo sapiens OX=9606 GN=ACTG1 PE=1 SV=1
30	67	P51693|APLP1_HUMAN	317.72	41	36	35	35	41	37	38	53900	51600	38900	260000	45100	68600	38	38	177	220	178	488	185	232	Carbamidomethylation; Oxidation (M); Phosphorylation (STY)	72176	Amyloid-like protein 1 OS=Homo sapiens OX=9606 GN=APLP1 PE=1 SV=3
49	2	P60709|ACTB_HUMAN	317.68	91	67	65	62	90	90	82	603	387	479	2570	1000	940	32	1	96	91	80	259	174	138	Carbamidomethylation; Oxidation (M); Acetylation (Protein N-term); Phosphorylation (STY)	41737	Actin cytoplasmic 1 OS=Homo sapiens OX=9606 GN=ACTB PE=1 SV=1
116	27	P08253|MMP2_HUMAN	312.95	64	28	32	30	63	28	33	1330	2000	1860	24500	2230	3810	38	38	30	39	29	125	28	37	Carbamidomethylation; Oxidation (M); Acetylation (Protein N-term); Phosphorylation (STY)	73882	72 kDa type IV collagenase OS=Homo sapiens OX=9606 GN=MMP2 PE=1 SV=2
149	62	P21333|FLNA_HUMAN	312.46	36	4	2	6	31	7	7	5050	1870	1670	8110	3370	4500	65	61	30	15	18	97	43	31	Carbamidomethylation; Oxidation (M); Acetylation (Protein N-term); Phosphorylation (STY)	280737	Filamin-A OS=Homo sapiens OX=9606 GN=FLNA PE=1 SV=4
41	64	P36955|PEDF_HUMAN	310.3	61	54	50	54	60	58	55	38300	63900	47800	284000	49800	83200	26	26	127	150	106	363	140	158	Carbamidomethylation; Oxidation (M); Acetylation (Protein N-term); Phosphorylation (STY)	46312	Pigment epithelium-derived factor OS=Homo sapiens OX=9606 GN=SERPINF1 PE=1 SV=4
115	48	P26038|MOES_HUMAN	309.97	67	14	23	22	62	46	30	2000	1650	2030	19500	6460	4080	43	31	33	27	26	123	48	44	Carbamidomethylation; Oxidation (M); Acetylation (Protein N-term); Phosphorylation (STY)	67820	Moesin OS=Homo sapiens OX=9606 GN=MSN PE=1 SV=3
96	36	Q14766|LTBP1_HUMAN	309.73	32	16	13	18	27	15	18	44800	51500	22600	39900	50300	48200	40	39	53	49	54	81	53	66	Carbamidomethylation; Acetylation (Protein N-term); Phosphorylation (STY)	186795	Latent-transforming growth factor beta-binding protein 1 OS=Homo sapiens OX=9606 GN=LTBP1 PE=1 SV=4
88	120	P19827|ITIH1_HUMAN	309.54	29	9	17	23	29	22	23	692	1260	31400	38900	1930	3950	22	22	14	33	136	137	36	48	Carbamidomethylation; Oxidation (M); Phosphorylation (STY)	101389	Inter-alpha-trypsin inhibitor heavy chain H1 OS=Homo sapiens OX=9606 GN=ITIH1 PE=1 SV=3
132	127	P05156|CFAI_HUMAN	308.78	41	28	31	29	36	29	29	3820	2830	9050	18500	4420	6070	22	22	36	33	51	63	32	38	Carbamidomethylation; Oxidation (M); Acetylation (Protein N-term); Phosphorylation (STY)	65750	Complement factor I OS=Homo sapiens OX=9606 GN=CFI PE=1 SV=2
121	35	Q14624|ITIH4_HUMAN	308.46	38	14	14	30	38	17	19	5450	4520	16900	29100	6460	8690	34	34	21	27	60	97	36	54	Carbamidomethylation; Oxidation (M); Acetylation (Protein N-term); Phosphorylation (STY)	103357	Inter-alpha-trypsin inhibitor heavy chain H4 OS=Homo sapiens OX=9606 GN=ITIH4 PE=1 SV=4
60	70	O94985|CSTN1_HUMAN	308.29	39	18	22	25	38	28	28	11900	18400	13100	98600	10400	25400	36	36	62	98	58	248	61	104	Carbamidomethylation; Oxidation (M); Phosphorylation (STY)	109793	Calsyntenin-1 OS=Homo sapiens OX=9606 GN=CLSTN1 PE=1 SV=1
46	234	P24592|IBP6_HUMAN	308.1	78	53	53	67	77	53	61	89900	39100	34600	110000	71800	118000	19	19	159	134	115	237	155	183	Carbamidomethylation; Oxidation (M); Phosphorylation (STY)	25322	Insulin-like growth factor-binding protein 6 OS=Homo sapiens OX=9606 GN=IGFBP6 PE=1 SV=1
139	16	P00747|PLMN_HUMAN	306.31	52	25	25	44	43	17	43	7450	5910	6080	6250	4430	6590	31	31	29	37	71	50	21	40	Carbamidomethylation; Oxidation (M); Phosphorylation (STY)	90569	Plasminogen OS=Homo sapiens OX=9606 GN=PLG PE=1 SV=2
266	63	P04275|VWF_HUMAN	306.24	31	4	2	18	14	1	3	184	148	3220	2720	0	2030	45	45	3	3	42	41	1	7	Carbamidomethylation; Oxidation (M); Acetylation (Protein N-term); Phosphorylation (STY)	309262	von Willebrand factor OS=Homo sapiens OX=9606 GN=VWF PE=1 SV=4
133	49	P14618|KPYM_HUMAN	305.7	63	38	35	17	63	43	37	1190	1400	323	13000	1520	1410	34	34	31	38	10	98	54	32	Carbamidomethylation; Oxidation (M); Phosphorylation (STY)	57937	Pyruvate kinase PKM OS=Homo sapiens OX=9606 GN=PKM PE=1 SV=4
45	186	P02749|APOH_HUMAN	305.42	65	49	52	55	63	52	43	28900	36400	72200	164000	38000	60100	16	16	105	114	171	259	119	125	Carbamidomethylation; Oxidation (M); Acetylation (Protein N-term); Phosphorylation (STY)	38298	Beta-2-glycoprotein 1 OS=Homo sapiens OX=9606 GN=APOH PE=1 SV=3
84	123	Q15113|PCOC1_HUMAN	305.14	72	45	41	41	64	47	54	8710	8510	10700	60100	10300	18100	27	27	51	46	60	133	51	77	Carbamidomethylation; Oxidation (M); Acetylation (Protein N-term); Phosphorylation (STY)	47973	Procollagen C-endopeptidase enhancer 1 OS=Homo sapiens OX=9606 GN=PCOLCE PE=1 SV=2
130	76	P14625|ENPL_HUMAN	305.1	56	21	22	20	55	28	33	8150	23900	10700	23200	14000	10900	41	40	42	38	26	99	48	59	Carbamidomethylation; Oxidation (M); Acetylation (Protein N-term); Phosphorylation (STY)	92469	Endoplasmin OS=Homo sapiens OX=9606 GN=HSP90B1 PE=1 SV=1
127	61	O94856|NFASC_HUMAN	304.32	41	10	15	13	39	13	18	1760	2900	2420	31400	5910	4230	45	45	23	37	27	122	34	34	Carbamidomethylation; Oxidation (M); Acetylation (Protein N-term); Phosphorylation (STY)	150026	Neurofascin OS=Homo sapiens OX=9606 GN=NFASC PE=1 SV=4
83	87	P02452|CO1A1_HUMAN	303.77	29	16	17	18	24	15	21	10100	8160	9770	30400	7450	8730	28	27	61	61	70	116	72	73	Carbamidomethylation; Oxidation (M); Acetylation (Protein N-term); Phosphorylation (STY)	138942	Collagen alpha-1(I) chain OS=Homo sapiens OX=9606 GN=COL1A1 PE=1 SV=5
118	71	Q14767|LTBP2_HUMAN	303.39	41	11	17	15	32	20	19	22600	10500	13100	32600	25400	15100	49	49	36	34	36	126	53	65	Carbamidomethylation; Oxidation (M); Acetylation (Protein N-term); Phosphorylation (STY)	195051	Latent-transforming growth factor beta-binding protein 2 OS=Homo sapiens OX=9606 GN=LTBP2 PE=1 SV=3
39	146	P01860|IGHG3_HUMAN	302.38	62	41	39	59	46	45	43	5480	12900	55800	55700	9230	18900	22	10	125	140	258	338	131	145	Carbamidomethylation; Oxidation (M); Phosphorylation (STY)	41287	Immunoglobulin heavy constant gamma 3 OS=Homo sapiens OX=9606 GN=IGHG3 PE=1 SV=2
134	55	P06681|CO2_HUMAN	301.03	55	23	18	34	49	23	24	2320	5880	6240	22300	3030	4450	38	38	23	24	49	106	30	24	Carbamidomethylation; Oxidation (M); Acetylation (Protein N-term); Phosphorylation (STY)	83268	Complement C2 OS=Homo sapiens OX=9606 GN=C2 PE=1 SV=2
56	149	P07197|NFM_HUMAN	299.35	33	19	20	16	24	15	19	21700	71300	58600	96800	46800	73000	35	34	48	148	138	187	114	150	Acetylation (Protein N-term); Phosphorylation (STY)	102472	Neurofilament medium polypeptide OS=Homo sapiens OX=9606 GN=NEFM PE=1 SV=3
105	77	P02538|K2C6A_HUMAN	298.96	63	16	26	35	59	34	38		0	203	972	0	777	47	2	23	54	54	110	37	54	Carbamidomethylation; Oxidation (M); Acetylation (Protein N-term); Phosphorylation (STY)	60045	Keratin type II cytoskeletal 6A OS=Homo sapiens OX=9606 GN=KRT6A PE=1 SV=3
61	106	P04004|VTNC_HUMAN	297.48	70	57	44	59	56	63	69	10200	12900	30400	91400	14500	21100	23	23	68	69	137	178	79	93	Carbamidomethylation; Oxidation (M); Phosphorylation (STY)	54306	Vitronectin OS=Homo sapiens OX=9606 GN=VTN PE=1 SV=1
181	56	P11047|LAMC1_HUMAN	297.41	46	6	10	8	36	8	17	244	435	474	5850	358	1460	46	46	9	18	7	73	11	30	Carbamidomethylation; Oxidation (M); Acetylation (Protein N-term); Phosphorylation (STY)	177602	Laminin subunit gamma-1 OS=Homo sapiens OX=9606 GN=LAMC1 PE=1 SV=3
177	140	P00748|FA12_HUMAN	296.93	38	23	13	34	31	25	25	1590	998	7660	10900	1320	3050	19	19	27	9	37	45	20	19	Carbamidomethylation; Acetylation (Protein N-term); Phosphorylation (STY)	67792	Coagulation factor XII OS=Homo sapiens OX=9606 GN=F12 PE=1 SV=3
195	65	Q92859|NEO1_HUMAN	295.46	42	8	15	8	35	6	7	497	3420	960	14800	182	1680	41	41	11	20	10	70	6	15	Carbamidomethylation; Acetylation (Protein N-term); Phosphorylation (STY)	160016	Neogenin OS=Homo sapiens OX=9606 GN=NEO1 PE=1 SV=2
108	78	P48668|K2C6C_HUMAN	295.02	62	20	26	35	56	34	39	0					42.2	48	2	26	56	53	108	36	52	Carbamidomethylation; Oxidation (M); Acetylation (Protein N-term); Phosphorylation (STY)	60025	Keratin type II cytoskeletal 6C OS=Homo sapiens OX=9606 GN=KRT6C PE=1 SV=3
135	57	P05164|PERM_HUMAN	294.27	50	37	28	19	40	36	29	1380	894	715	10300	3690	1490	28	28	43	26	19	60	66	39	Carbamidomethylation; Oxidation (M); Acetylation (Protein N-term); Phosphorylation (STY)	83869	Myeloperoxidase OS=Homo sapiens OX=9606 GN=MPO PE=1 SV=1
97	91	P04259|K2C6B_HUMAN	292.68	65	18	29	37	60	32	33		99.6	36.8	319			48	3	28	58	57	118	37	51	Carbamidomethylation; Oxidation (M); Acetylation (Protein N-term); Phosphorylation (STY)	60067	Keratin type II cytoskeletal 6B OS=Homo sapiens OX=9606 GN=KRT6B PE=1 SV=5
81	75	P01871|IGHM_HUMAN	291.18	62	35	45	36	55	59	43	2940	5160	22900	82900	13700	15400	22	22	27	47	73	158	56	64	Carbamidomethylation; Oxidation (M); Acetylation (Protein N-term); Phosphorylation (STY)	49440	Immunoglobulin heavy constant mu OS=Homo sapiens OX=9606 GN=IGHM PE=1 SV=4
179	68	P01031|CO5_HUMAN	290.42	26	3	6	12	23	8	9	562	674	1660	7630	2880	1650	32	32	11	17	25	59	23	24	Carbamidomethylation; Oxidation (M); Acetylation (Protein N-term); Phosphorylation (STY)	188304	Complement C5 OS=Homo sapiens OX=9606 GN=C5 PE=1 SV=4
67	223	Q16270|IBP7_HUMAN	290.08	59	49	56	56	59	56	56	12200	18100	30400	80100	17800	29000	17	17	71	84	101	144	68	91	Carbamidomethylation; Oxidation (M); Phosphorylation (STY)	29130	Insulin-like growth factor-binding protein 7 OS=Homo sapiens OX=9606 GN=IGFBP7 PE=1 SV=1
103	99	Q24JP5|T132A_HUMAN	288.98	26	7	12	5	26	8	8	19500	14400	13400	25400	11700	16000	26	26	63	51	49	92	49	66	Carbamidomethylation; Acetylation (Protein N-term); Phosphorylation (STY)	110110	Transmembrane protein 132A OS=Homo sapiens OX=9606 GN=TMEM132A PE=1 SV=1
143	59	Q15582|BGH3_HUMAN	288.69	51	16	22	25	47	39	28	590	625	1920	22500	1920	2880	31	31	24	26	19	83	37	31	Carbamidomethylation; Oxidation (M); Acetylation (Protein N-term); Phosphorylation (STY)	74681	Transforming growth factor-beta-induced protein ig-h3 OS=Homo sapiens OX=9606 GN=TGFBI PE=1 SV=1
29	255	P68871|HBB_HUMAN	285.95	95	82	95	87	95	93	95	18300	127000	6220	290000	8870	128000	14	7	53	281	48	555	49	331	Carbamidomethylation; Oxidation (M); Acetylation (Protein N-term); Phosphorylation (STY)	15998	Hemoglobin subunit beta OS=Homo sapiens OX=9606 GN=HBB PE=1 SV=2
208	58	Q12860|CNTN1_HUMAN	284.24	45	8	24	9	42	11	16	267	621	175	10900	460	1340	39	39	5	29	7	61	12	16	Carbamidomethylation; Oxidation (M); Acetylation (Protein N-term); Phosphorylation (STY)	113320	Contactin-1 OS=Homo sapiens OX=9606 GN=CNTN1 PE=1 SV=1
178	79	O95428|PPN_HUMAN	282.9	36	4	7	14	35	14	19	980	1040	1110	9600	1050	2400	36	36	9	11	16	76	15	30	Carbamidomethylation; Phosphorylation (STY)	137700	Papilin OS=Homo sapiens OX=9606 GN=PAPLN PE=2 SV=4
87	144	P04406|G3P_HUMAN	282.89	76	60	70	69	76	69	71	4410	4340	4470	23900	10300	6670	20	20	54	59	42	136	98	60	Carbamidomethylation; Oxidation (M); Phosphorylation (STY)	36053	Glyceraldehyde-3-phosphate dehydrogenase OS=Homo sapiens OX=9606 GN=GAPDH PE=1 SV=3
148	104	P06733|ENOA_HUMAN	282.7	58	32	39	27	50	36	41	2000	1760	1880	15000	4890	3510	22	18	26	24	22	71	43	27	Carbamidomethylation; Oxidation (M); Acetylation (Protein N-term); Phosphorylation (STY)	47169	Alpha-enolase OS=Homo sapiens OX=9606 GN=ENO1 PE=1 SV=2
100	217	Q03591|FHR1_HUMAN	282.69	78	46	47	56	56	56	46	125	1150	4450	8920	1980	3240	18	4	32	30	79	87	49	51	Carbamidomethylation; Oxidation (M); Acetylation (Protein N-term); Phosphorylation (STY)	37651	Complement factor H-related protein 1 OS=Homo sapiens OX=9606 GN=CFHR1 PE=1 SV=2
73	138	O43493|TGON2_HUMAN	282.31	63	41	35	41	48	40	42	92800	80900	138000	59300	74000	61900	31	31	106	117	73	94	86	77	Oxidation (M); Acetylation (Protein N-term); Phosphorylation (STY)	51019	Trans-Golgi network integral membrane protein 2 OS=Homo sapiens OX=9606 GN=TGOLN2 PE=1 SV=3
227	83	P02787|TRFE_HUMAN	282.07	49	10	16	14	46	21	19	94.6	0	526	4300	155	2210	33	33	6	11	14	47	17	14	Carbamidomethylation; Oxidation (M); Acetylation (Protein N-term); Phosphorylation (STY)	77064	Serotransferrin OS=Homo sapiens OX=9606 GN=TF PE=1 SV=3
113	116	P05546|HEP2_HUMAN	281.45	45	22	30	28	43	26	26	9130	9020	15800	22600	9310	10300	22	22	49	41	60	70	44	47	Carbamidomethylation; Oxidation (M); Acetylation (Protein N-term); Phosphorylation (STY)	57071	Heparin cofactor 2 OS=Homo sapiens OX=9606 GN=SERPIND1 PE=1 SV=3
104	117	P13647|K2C5_HUMAN	279.69	57	21	24	32	49	28	34	262	303	3230	10600	954	1850	41	24	32	48	53	112	38	43	Carbamidomethylation; Oxidation (M); Acetylation (Protein N-term); Phosphorylation (STY)	62378	Keratin type II cytoskeletal 5 OS=Homo sapiens OX=9606 GN=KRT5 PE=1 SV=3
12	318	P0DOX7|IGK_HUMAN	279.66	60	60	58	60	60	60	59	1510	2360	5840	18600	3220	3650	11	3	287	288	636	726	391	483	Carbamidomethylation; Oxidation (M); Acetylation (Protein N-term); Phosphorylation (STY)	23379	Immunoglobulin kappa light chain OS=Homo sapiens OX=9606 PE=1 SV=1
161	82	P07942|LAMB1_HUMAN	279.26	31	13	10	13	27	9	16	10800	12500	16800	12000	7790	10700	41	41	43	36	35	66	31	44	Carbamidomethylation; Oxidation (M); Acetylation (Protein N-term); Phosphorylation (STY)	198037	Laminin subunit beta-1 OS=Homo sapiens OX=9606 GN=LAMB1 PE=1 SV=2
63	137	P12036|NFH_HUMAN	277.8	36	15	26	23	29	27	26	8110	32000	31100	41200	27100	50000	60	58	49	150	117	134	122	140	Carbamidomethylation; Acetylation (Protein N-term); Phosphorylation (STY)	112479	Neurofilament heavy polypeptide OS=Homo sapiens OX=9606 GN=NEFH PE=1 SV=4
111	279	Q9H1E3|NUCKS_HUMAN	276.9	69	29	37	50	68	53	63	1440	2020	12100	70400	9040	25300	24	24	14	26	69	63	71	135	Oxidation (M); Acetylation (Protein N-term); Phosphorylation (STY)	27296	Nuclear ubiquitous casein and cyclin-dependent kinase substrate 1 OS=Homo sapiens OX=9606 GN=NUCKS1 PE=1 SV=1
101	126	P04075|ALDOA_HUMAN	276.51	67	37	46	37	65	42	42	8700	13800	3670	24300	9170	6030	23	19	39	38	26	124	57	44	Carbamidomethylation; Oxidation (M); Phosphorylation (STY)	39420	Fructose-bisphosphate aldolase A OS=Homo sapiens OX=9606 GN=ALDOA PE=1 SV=2
110	191	P01876|IGHA1_HUMAN	276.47	67	36	58	50	67	58	65	761	641	6990	11900	1540	2740	17	10	21	23	72	105	50	46	Carbamidomethylation; Oxidation (M); Phosphorylation (STY)	37655	Immunoglobulin heavy constant alpha 1 OS=Homo sapiens OX=9606 GN=IGHA1 PE=1 SV=2
125	90	Q92954|PRG4_HUMAN	276.32	29	13	7	9	22	11	11	10200	5270	9110	14400	11200	7880	36	36	74	37	41	87	71	52	Carbamidomethylation; Oxidation (M); Acetylation (Protein N-term); Phosphorylation (STY)	151060	Proteoglycan 4 OS=Homo sapiens OX=9606 GN=PRG4 PE=1 SV=3
42	247	P24593|IBP5_HUMAN	276.22	55	42	42	41	55	50	44	253000	179000	204000	228000	201000	247000	15	15	244	184	243	255	249	295	Carbamidomethylation; Oxidation (M); Phosphorylation (STY)	30570	Insulin-like growth factor-binding protein 5 OS=Homo sapiens OX=9606 GN=IGFBP5 PE=1 SV=1
145	47	Q16610|ECM1_HUMAN	275.61	63	36	37	27	61	45	51	1350	1310	531	17100	1290	2440	26	26	25	28	14	77	37	39	Carbamidomethylation; Oxidation (M); Phosphorylation (STY)	60674	Extracellular matrix protein 1 OS=Homo sapiens OX=9606 GN=ECM1 PE=1 SV=2
162	80	P11021|BIP_HUMAN	274.13	49	17	23	22	45	13	26	10600	5900	7970	10800	4610	5680	29	27	25	30	22	59	24	31	Oxidation (M); Acetylation (Protein N-term); Phosphorylation (STY)	72333	Endoplasmic reticulum chaperone BiP OS=Homo sapiens OX=9606 GN=HSPA5 PE=1 SV=2
180	131	P24821|TENA_HUMAN	273.97	22	3	1	8	11	3	4	12300	3850	101000	11900	11100	30000	26	26	11	9	67	34	16	20	Carbamidomethylation; Oxidation (M); Acetylation (Protein N-term); Phosphorylation (STY)	240851	Tenascin OS=Homo sapiens OX=9606 GN=TNC PE=1 SV=3
62	233	P02042|HBD_HUMAN	273.87	93	76	84	37	93	46	84	345	9050		25800	13.7	9870	13	6	23	143	7	252	12	135	Carbamidomethylation; Oxidation (M); Acetylation (Protein N-term); Phosphorylation (STY)	16055	Hemoglobin subunit delta OS=Homo sapiens OX=9606 GN=HBD PE=1 SV=2
230	160	O43866|CD5L_HUMAN	272.56	69	35	41	60	64	46	48	244	587	4290	10800	525	1890	19	19	6	11	26	47	14	14	Carbamidomethylation; Acetylation (Protein N-term); Phosphorylation (STY)	38088	CD5 antigen-like OS=Homo sapiens OX=9606 GN=CD5L PE=1 SV=1
189	110	P08779|K1C16_HUMAN	271.41	64	10	18	26	61	15	20		0	317	2910	0	103	32	16	14	19	19	65	17	23	Carbamidomethylation; Oxidation (M); Acetylation (Protein N-term); Phosphorylation (STY)	51268	Keratin type I cytoskeletal 16 OS=Homo sapiens OX=9606 GN=KRT16 PE=1 SV=4
64	171	O14791|APOL1_HUMAN	271.4	60	21	19	49	38	24	27	34700	22800	191000	41000	42800	47100	26	26	83	71	203	87	93	104	Carbamidomethylation; Oxidation (M); Acetylation (Protein N-term); Phosphorylation (STY)	43974	Apolipoprotein L1 OS=Homo sapiens OX=9606 GN=APOL1 PE=1 SV=5
152	85	P08123|CO1A2_HUMAN	270.56	26	12	14	9	23	15	14	539	990	2500	16500	1380	2000	30	30	27	30	16	75	31	28	Carbamidomethylation; Oxidation (M); Acetylation (Protein N-term); Phosphorylation (STY)	129314	Collagen alpha-2(I) chain OS=Homo sapiens OX=9606 GN=COL1A2 PE=1 SV=7
157	103	P02533|K1C14_HUMAN	270.54	65	14	32	41	61	20	28	319	263	1030	6970	389	673	34	13	17	32	32	89	21	38	Carbamidomethylation; Oxidation (M); Acetylation (Protein N-term); Phosphorylation (STY)	51562	Keratin type I cytoskeletal 14 OS=Homo sapiens OX=9606 GN=KRT14 PE=1 SV=4
11	439	P01834|IGKC_HUMAN	270.15	93	93	90	93	93	93	91	5100	8400	17000	56000	8690	15000	11	3	283	294	638	712	394	491	Carbamidomethylation; Acetylation (Protein N-term); Phosphorylation (STY)	11765	Immunoglobulin kappa constant OS=Homo sapiens OX=9606 GN=IGKC PE=1 SV=2
151	98	Q86YZ3|HORN_HUMAN	269.76	19	6	6	15	10	5	7	26100	18700	39300	20400	15500	31200	39	39	44	38	78	44	33	44	Acetylation (Protein N-term); Phosphorylation (STY)	282389	Hornerin OS=Homo sapiens OX=9606 GN=HRNR PE=1 SV=2
247	86	Q86UX2|ITIH5_HUMAN	269.17	37	5	14	9	33	6	13	404	343	623	6450	153	995	27	27	6	12	6	48	9	18	Carbamidomethylation; Oxidation (M); Acetylation (Protein N-term); Phosphorylation (STY)	104576	Inter-alpha-trypsin inhibitor heavy chain H5 OS=Homo sapiens OX=9606 GN=ITIH5 PE=2 SV=2
250	88	Q9Y4C0|NRX3A_HUMAN	268.77	27	4	7	4	24	4	10	66.1	564	75	6610	201	4170	36	32	10	16	6	57	8	19	Carbamidomethylation; Oxidation (M); Acetylation (Protein N-term); Phosphorylation (STY)	180598	Neurexin-3 OS=Homo sapiens OX=9606 GN=NRXN3 PE=1 SV=4
66	178	P68032|ACTC_HUMAN	268.38	61	41	38	42	61	40	43	736	727	4030	9140	1780	1700	21	6	74	71	67	176	118	94	Carbamidomethylation; Oxidation (M); Acetylation (Protein N-term); Phosphorylation (STY)	42019	Actin alpha cardiac muscle 1 OS=Homo sapiens OX=9606 GN=ACTC1 PE=1 SV=1
106	94	P01009|A1AT_HUMAN	268.36	60	28	35	38	60	33	33	4390	6110	16600	39700	6040	6050	24	24	35	43	61	124	32	28	Carbamidomethylation; Oxidation (M); Phosphorylation (STY)	46737	Alpha-1-antitrypsin OS=Homo sapiens OX=9606 GN=SERPINA1 PE=1 SV=3
124	272	P02760|AMBP_HUMAN	267.7	39	20	26	30	39	23	22	1450	1940	22100	20400	2740	6410	15	15	27	27	79	60	29	39	Carbamidomethylation; Oxidation (M); Acetylation (Protein N-term); Phosphorylation (STY)	39000	Protein AMBP OS=Homo sapiens OX=9606 GN=AMBP PE=1 SV=1
192	69	O00391|QSOX1_HUMAN	267.53	39	10	11	16	38	15	21	1610	1620	1480	15000	2370	4550	24	24	16	17	14	61	17	22	Carbamidomethylation; Oxidation (M); Acetylation (Protein N-term); Phosphorylation (STY)	82578	Sulfhydryl oxidase 1 OS=Homo sapiens OX=9606 GN=QSOX1 PE=1 SV=3
102	157	P36222|CH3L1_HUMAN	266.83	50	37	37	32	50	42	34	2370	2810	5390	46900	5460	6870	16	16	36	42	34	113	42	48	Carbamidomethylation; Oxidation (M); Phosphorylation (STY)	42625	Chitinase-3-like protein 1 OS=Homo sapiens OX=9606 GN=CHI3L1 PE=1 SV=2
163	143	P52209|6PGD_HUMAN	266.83	63	41	22	21	53	42	46	4600	1790	793	12900	5940	4480	21	20	23	16	12	56	47	33	Carbamidomethylation; Oxidation (M); Acetylation (Protein N-term); Phosphorylation (STY)	53140	6-phosphogluconate dehydrogenase decarboxylating OS=Homo sapiens OX=9606 GN=PGD PE=1 SV=3
164	115	P00734|THRB_HUMAN	266.77	50	8	27	29	42	13	28	68.8	1010	4760	8020	257	5470	24	24	5	29	45	53	5	51	Carbamidomethylation; Oxidation (M); Acetylation (Protein N-term); Phosphorylation (STY)	70037	Prothrombin OS=Homo sapiens OX=9606 GN=F2 PE=1 SV=2
92	139	Q8TDL5|BPIB1_HUMAN	266.5	66	30	47	30	64	44	44	498	492	273	12100	4470	1800	19	19	37	36	14	130	99	49	Carbamidomethylation; Oxidation (M); Phosphorylation (STY)	52442	BPI fold-containing family B member 1 OS=Homo sapiens OX=9606 GN=BPIFB1 PE=1 SV=1
160	114	P22079|PERL_HUMAN	265.71	47	25	27	18	44	35	33	1170	802	235	7750	3500	1670	20	20	25	20	10	64	38	24	Carbamidomethylation; Oxidation (M); Phosphorylation (STY)	80288	Lactoperoxidase OS=Homo sapiens OX=9606 GN=LPO PE=1 SV=2
223	95	Q9ULB1|NRX1A_HUMAN	264.97	33	6	9	4	28	5	10	0	120	0	5180	73.7	299	34	24	10	17	8	66	6	13	Carbamidomethylation; Oxidation (M); Acetylation (Protein N-term); Phosphorylation (STY)	161882	Neurexin-1 OS=Homo sapiens OX=9606 GN=NRXN1 PE=2 SV=1
86	207	P17936|IBP3_HUMAN	264.83	61	26	18	52	61	31	45	25800	18200	80600	34600	60600	87200	24	24	65	42	144	86	93	118	Carbamidomethylation; Oxidation (M); Acetylation (Protein N-term); Phosphorylation (STY)	31674	Insulin-like growth factor-binding protein 3 OS=Homo sapiens OX=9606 GN=IGFBP3 PE=1 SV=2
297	194	P07996|TSP1_HUMAN	264.73	27	9	3	3	19	6	14	119	66.9	0	2070	327	728	22	21	6	5	1	29	7	18	Carbamidomethylation; Oxidation (M); Acetylation (Protein N-term); Phosphorylation (STY)	129383	Thrombospondin-1 OS=Homo sapiens OX=9606 GN=THBS1 PE=1 SV=2
245	111	Q8TER0|SNED1_HUMAN	262.34	23	3	4	5	21	4	10	32.8	35.6	305	5950	126	823	25	25	6	6	10	43	11	23	Carbamidomethylation; Acetylation (Protein N-term); Phosphorylation (STY)	152203	Sushi nidogen and EGF-like domain-containing protein 1 OS=Homo sapiens OX=9606 GN=SNED1 PE=2 SV=2
75	254	P29966|MARCS_HUMAN	262.19	89	39	33	65	66	42	61	16600	16300	13900	25000	14900	26700	16	16	80	80	64	116	58	97	Carbamidomethylation; Phosphorylation (STY)	31555	Myristoylated alanine-rich C-kinase substrate OS=Homo sapiens OX=9606 GN=MARCKS PE=1 SV=4
10	362	P05109|S10A8_HUMAN	260.73	90	76	89	82	90	85	76	44200	42000	53600	141000	82200	71100	16	16	439	426	339	632	567	450	Carbamidomethylation; Oxidation (M); Acetylation (Protein N-term); Phosphorylation (STY)	10835	Protein S100-A8 OS=Homo sapiens OX=9606 GN=S100A8 PE=1 SV=1
196	118	P01008|ANT3_HUMAN	260.53	47	9	20	14	47	20	20	1700	1710	1620	20400	3740	2660	24	24	15	32	15	53	21	19	Carbamidomethylation; Oxidation (M); Phosphorylation (STY)	52602	Antithrombin-III OS=Homo sapiens OX=9606 GN=SERPINC1 PE=1 SV=1
19	319	P69905|HBA_HUMAN	259.78	92	89	91	63	92	84	92	8740	107000	1870	312000	8040	147000	11	11	62	311	18	922	63	569	Carbamidomethylation; Oxidation (M); Acetylation (Protein N-term); Phosphorylation (STY)	15258	Hemoglobin subunit alpha OS=Homo sapiens OX=9606 GN=HBA1 PE=1 SV=2
191	102	P00558|PGK1_HUMAN	258.63	70	27	28	11	62	30	22	24800	1380	294	6850	863	1920	22	22	19	31	10	43	15	19	Carbamidomethylation; Oxidation (M); Acetylation (Protein N-term); Phosphorylation (STY)	44615	Phosphoglycerate kinase 1 OS=Homo sapiens OX=9606 GN=PGK1 PE=1 SV=3
37	271	P05090|APOD_HUMAN	257.81	62	48	60	47	56	36	54	89300	102000	83400	339000	109000	151000	15	15	144	156	131	369	169	225	Carbamidomethylation; Oxidation (M); Acetylation (Protein N-term); Phosphorylation (STY)	21276	Apolipoprotein D OS=Homo sapiens OX=9606 GN=APOD PE=1 SV=1
251	92	P13796|PLSL_HUMAN	255.38	46	12	14	10	42	20	19	238	32.3	38.9	4940	174	165	22	22	7	4	11	47	12	11	Carbamidomethylation; Oxidation (M); Acetylation (Protein N-term); Phosphorylation (STY)	70289	Plastin-2 OS=Homo sapiens OX=9606 GN=LCP1 PE=1 SV=6
147	161	P55058|PLTP_HUMAN	255.19	46	16	20	19	41	39	28	1690	2590	5790	41100	4630	4600	18	18	16	21	34	98	37	31	Oxidation (M); Acetylation (Protein N-term); Phosphorylation (STY)	54739	Phospholipid transfer protein OS=Homo sapiens OX=9606 GN=PLTP PE=1 SV=1
324	100	P78509|RELN_HUMAN	253.99	16	2	2	4	12	1	2	991	394	342	3290	377	665	36	36	5	8	7	39	4	5	Carbamidomethylation; Acetylation (Protein N-term); Phosphorylation (STY)	388389	Reelin OS=Homo sapiens OX=9606 GN=RELN PE=1 SV=3
172	125	P08238|HS90B_HUMAN	253.6	37	14	15	15	33	20	23	3510	2490	2970	4480	5290	9450	27	16	22	20	18	49	30	28	Carbamidomethylation; Oxidation (M); Acetylation (Protein N-term); Phosphorylation (STY)	83264	Heat shock protein HSP 90-beta OS=Homo sapiens OX=9606 GN=HSP90AB1 PE=1 SV=4
59	231	P01861|IGHG4_HUMAN	253.51	50	30	29	50	49	34	50	51.5	0	3470	4130	41.3	800	13	7	112	95	136	230	113	95	Carbamidomethylation; Oxidation (M); Acetylation (Protein N-term); Phosphorylation (STY)	35941	Immunoglobulin heavy constant gamma 4 OS=Homo sapiens OX=9606 GN=IGHG4 PE=1 SV=1
112	192	P20774|MIME_HUMAN	253.14	61	42	43	43	59	41	48	3900	6260	4210	55100	5010	9770	19	19	24	40	29	127	38	46	Carbamidomethylation; Phosphorylation (STY)	33922	Mimecan OS=Homo sapiens OX=9606 GN=OGN PE=1 SV=1
187	283	P80723|BASP1_HUMAN	253.06	76	19	28	67	76	19	55	1990	4600	1970	6920	1920	3110	16	16	17	29	19	52	12	21	Phosphorylation (STY)	22693	Brain acid soluble protein 1 OS=Homo sapiens OX=9606 GN=BASP1 PE=1 SV=2
200	135	P07602|SAP_HUMAN	252.96	42	22	18	22	41	23	20	339	576	966	9120	663	955	21	21	14	15	20	48	19	13	Carbamidomethylation; Oxidation (M); Phosphorylation (STY)	58113	Prosaposin OS=Homo sapiens OX=9606 GN=PSAP PE=1 SV=2
215	148	O00451|GFRA2_HUMAN	252.79	42	20	21	21	42	15	23	673	1330	720	12800	688	2430	18	18	14	18	13	42	13	20	Carbamidomethylation; Oxidation (M); Phosphorylation (STY)	51544	GDNF family receptor alpha-2 OS=Homo sapiens OX=9606 GN=GFRA2 PE=1 SV=2
138	107	P13646|K1C13_HUMAN	252.29	64	22	25	33	54	27	50	2250	6340	25700	7490	7940	36300	25	13	20	23	44	62	39	82	Carbamidomethylation; Oxidation (M); Acetylation (Protein N-term); Phosphorylation (STY)	49588	Keratin type I cytoskeletal 13 OS=Homo sapiens OX=9606 GN=KRT13 PE=1 SV=4
107	313	P05452|TETN_HUMAN	251.3	76	43	53	53	68	55	49	12200	15000	15400	77500	13400	22900	15	15	35	39	37	111	36	44	Carbamidomethylation; Oxidation (M); Acetylation (Protein N-term); Phosphorylation (STY)	22537	Tetranectin OS=Homo sapiens OX=9606 GN=CLEC3B PE=1 SV=3
126	133	Q9HCB6|SPON1_HUMAN	250.99	46	10	13	14	29	12	24	28300	19600	21600	18500	19700	21200	27	27	53	43	39	65	41	52	Carbamidomethylation; Oxidation (M); Acetylation (Protein N-term); Phosphorylation (STY)	90974	Spondin-1 OS=Homo sapiens OX=9606 GN=SPON1 PE=1 SV=2
269	97	O00468|AGRIN_HUMAN	250.91	28	5	3	4	23	3	9	272	229	99	2680	447	709	33	33	7	7	8	46	9	17	Carbamidomethylation; Acetylation (Protein N-term); Phosphorylation (STY)	217318	Agrin OS=Homo sapiens OX=9606 GN=AGRN PE=1 SV=6
184	193	P48745|CCN3_HUMAN	249.83	58	34	31	28	47	36	36	551	807	2240	11400	1400	3440	18	18	13	13	18	51	16	22	Carbamidomethylation; Phosphorylation (STY)	39162	CCN family member 3 OS=Homo sapiens OX=9606 GN=CCN3 PE=1 SV=1
366	96	Q13332|PTPRS_HUMAN	248.18	18	1	4	1	16	1	1	183	223		2370	2880	0	22	19	2	7	1	40	2	1	Carbamidomethylation; Oxidation (M); Acetylation (Protein N-term); Phosphorylation (STY)	217039	Receptor-type tyrosine-protein phosphatase S OS=Homo sapiens OX=9606 GN=PTPRS PE=1 SV=3
174	155	P00738|HPT_HUMAN	244.72	56	22	25	45	48	31	20	702	572	4460	1350	513	388	20	9	16	22	65	29	13	14	Carbamidomethylation; Oxidation (M); Acetylation (Protein N-term); Phosphorylation (STY)	45205	Haptoglobin OS=Homo sapiens OX=9606 GN=HP PE=1 SV=1
54	652	P02652|APOA2_HUMAN	244.45	72	64	64	69	72	64	64	67200	49100	105000	159000	66600	87200	11	11	107	79	152	186	95	113	Carbamidomethylation; Oxidation (M); Acetylation (Protein N-term); Phosphorylation (STY)	11175	Apolipoprotein A-II OS=Homo sapiens OX=9606 GN=APOA2 PE=1 SV=1
239	142	Q9NRN5|OLFL3_HUMAN	244.3	50	18	16	25	50	19	24	514	276	2000	54800	6010	1830	20	20	9	7	16	46	8	15	Carbamidomethylation; Oxidation (M); Acetylation (Protein N-term); Phosphorylation (STY)	46010	Olfactomedin-like protein 3 OS=Homo sapiens OX=9606 GN=OLFML3 PE=2 SV=1
276	105	P55268|LAMB2_HUMAN	243.82	25	6	3	3	23	3	4	753	411	1070	3180	1590	904	32	32	11	7	7	40	12	9	Carbamidomethylation; Oxidation (M); Acetylation (Protein N-term); Phosphorylation (STY)	195980	Laminin subunit beta-2 OS=Homo sapiens OX=9606 GN=LAMB2 PE=1 SV=2
193	200	P07225|PROS_HUMAN	243.53	29	12	9	23	23	12	13	143	231	14600	5670	231	1380	15	15	11	7	64	33	9	17	Carbamidomethylation; Oxidation (M); Acetylation (Protein N-term); Phosphorylation (STY)	75123	Vitamin K-dependent protein S OS=Homo sapiens OX=9606 GN=PROS1 PE=1 SV=1
129	204	Q9BU40|CRDL1_HUMAN	243.48	60	21	11	20	47	26	25	26100	14200	14900	18600	30300	22200	23	23	71	45	49	68	70	53	Carbamidomethylation; Oxidation (M); Acetylation (Protein N-term); Phosphorylation (STY)	52026	Chordin-like protein 1 OS=Homo sapiens OX=9606 GN=CHRDL1 PE=1 SV=2
186	119	P16157|ANK1_HUMAN	243.14	19	6	7	2	5	1	15	2760	10800	557	1900	553	49000	30	30	27	44	3	17	2	111	Carbamidomethylation; Oxidation (M); Acetylation (Protein N-term); Phosphorylation (STY)	206263	Ankyrin-1 OS=Homo sapiens OX=9606 GN=ANK1 PE=1 SV=3
361	141	P23381|SYWC_HUMAN	240.79	56	8	3	18	54	14	8	119	36.1	489	2520	138	472	17	17	4	1	7	34	5	4	Carbamidomethylation; Oxidation (M); Acetylation (Protein N-term); Phosphorylation (STY)	53165	Tryptophan--tRNA ligase cytoplasmic OS=Homo sapiens OX=9606 GN=WARS PE=1 SV=2
368	122	P01023|A2MG_HUMAN	240.58	27	4	4	5	21	4	2	1080	1390	501	6350	1480	1280	24	24	4	5	6	28	8	4	Carbamidomethylation; Acetylation (Protein N-term); Phosphorylation (STY)	163290	Alpha-2-macroglobulin OS=Homo sapiens OX=9606 GN=A2M PE=1 SV=3
70	441	P07998|RNAS1_HUMAN	240.58	63	42	47	59	59	42	42	12000	17600	32400	81500	13800	19800	8	8	60	84	104	197	58	92	Carbamidomethylation; Oxidation (M); Acetylation (Protein N-term); Phosphorylation (STY)	17644	Ribonuclease pancreatic OS=Homo sapiens OX=9606 GN=RNASE1 PE=1 SV=4
98	274	Q562R1|ACTBL_HUMAN	240.29	39	20	19	19	30	26	26	0			22.1	313	14.2	14	4	39	36	40	101	67	56	Carbamidomethylation; Oxidation (M); Acetylation (Protein N-term); Phosphorylation (STY)	42003	Beta-actin-like protein 2 OS=Homo sapiens OX=9606 GN=ACTBL2 PE=1 SV=2
158	159	Q14520|HABP2_HUMAN	239.96	41	17	23	28	36	26	21	748	514	3360	20800	1720	2440	19	19	14	22	28	77	31	28	Carbamidomethylation; Phosphorylation (STY)	62672	Hyaluronan-binding protein 2 OS=Homo sapiens OX=9606 GN=HABP2 PE=1 SV=1
221	174	Q12805|FBLN3_HUMAN	239.93	48	23	16	15	42	28	21	1490	1780	997	11800	1350	2030	17	17	11	14	11	40	15	23	Carbamidomethylation; Oxidation (M); Phosphorylation (STY)	54641	EGF-containing fibulin-like extracellular matrix protein 1 OS=Homo sapiens OX=9606 GN=EFEMP1 PE=1 SV=2
175	277	P17677|NEUM_HUMAN	238.5	82	48	48	58	77	53	72	3830	2640	2580	6630	2160	3820	15	15	21	21	23	43	22	34	Phosphorylation (STY)	24803	Neuromodulin OS=Homo sapiens OX=9606 GN=GAP43 PE=1 SV=1
417	165	P08519|APOA_HUMAN	237.84	9	3	1	6	1	0	2	179	0	5000	113		170	26	26	4	2	33	2	0	4	Carbamidomethylation; Oxidation (M); Acetylation (Protein N-term); Phosphorylation (STY)	501323	Apolipoprotein(a) OS=Homo sapiens OX=9606 GN=LPA PE=1 SV=1
202	188	Q15818|NPTX1_HUMAN	237.14	38	21	27	19	38	26	28	685	534	441	12800	498	1520	17	17	15	18	13	50	15	21	Carbamidomethylation; Oxidation (M); Phosphorylation (STY)	47122	Neuronal pentraxin-1 OS=Homo sapiens OX=9606 GN=NPTX1 PE=2 SV=2
298	150	P03951|FA11_HUMAN	236.85	39	2	7	24	35	3	9	32.9	74.2	2310	2790	226	578	23	23	2	2	26	33	3	10	Carbamidomethylation; Oxidation (M); Phosphorylation (STY)	70109	Coagulation factor XI OS=Homo sapiens OX=9606 GN=F11 PE=1 SV=1
243	121	Q8IUX7|AEBP1_HUMAN	236.74	30	6	7	4	27	6	10	1780	114	301	6740	517	2910	28	27	10	9	7	57	17	20	Carbamidomethylation; Acetylation (Protein N-term); Phosphorylation (STY)	130929	Adipocyte enhancer-binding protein 1 OS=Homo sapiens OX=9606 GN=AEBP1 PE=1 SV=1
153	158	P05155|IC1_HUMAN	236.62	41	10	12	17	37	27	15	804	1930	3580	26800	1610	3220	19	19	6	13	26	104	21	27	Carbamidomethylation; Oxidation (M); Acetylation (Protein N-term); Phosphorylation (STY)	55154	Plasma protease C1 inhibitor OS=Homo sapiens OX=9606 GN=SERPING1 PE=1 SV=2
206	241	Q01518|CAP1_HUMAN	236.26	43	14	20	14	34	27	26	507	366	316	9020	4990	1620	16	16	16	15	4	45	41	17	Carbamidomethylation; Oxidation (M); Phosphorylation (STY)	51902	Adenylyl cyclase-associated protein 1 OS=Homo sapiens OX=9606 GN=CAP1 PE=1 SV=5
303	109	Q8N3T6|T132C_HUMAN	236.23	26	4	5	4	21	2	8	451	340	421	2490	223	1410	25	24	7	6	6	33	2	14	Carbamidomethylation; Oxidation (M); Acetylation (Protein N-term); Phosphorylation (STY)	121787	Transmembrane protein 132C OS=Homo sapiens OX=9606 GN=TMEM132C PE=2 SV=3
167	258	P69891|HBG1_HUMAN	236.12	80	7	73	7	72	7	80		586		777		1370	11	2	2	45	1	31	2	93	Carbamidomethylation; Oxidation (M); Acetylation (Protein N-term); Phosphorylation (STY)	16140	Hemoglobin subunit gamma-1 OS=Homo sapiens OX=9606 GN=HBG1 PE=1 SV=2
216	136	P18206|VINC_HUMAN	235.98	28	8	8	7	18	7	10	4030	2660	1840	4180	3150	4500	26	26	20	20	14	36	16	20	Oxidation (M); Acetylation (Protein N-term); Phosphorylation (STY)	123799	Vinculin OS=Homo sapiens OX=9606 GN=VCL PE=1 SV=4
307	132	P30101|PDIA3_HUMAN	235.91	46	3	10	9	46	11	8	88.5	210	263	2770	94	253	18	18	1	10	5	33	5	3	Carbamidomethylation; Phosphorylation (STY)	56782	Protein disulfide-isomerase A3 OS=Homo sapiens OX=9606 GN=PDIA3 PE=1 SV=4
166	257	P69892|HBG2_HUMAN	235.71	80	7	72	7	64	7	80		0				4530	11	2	2	43	1	28	2	98	Carbamidomethylation; Oxidation (M); Acetylation (Protein N-term); Phosphorylation (STY)	16126	Hemoglobin subunit gamma-2 OS=Homo sapiens OX=9606 GN=HBG2 PE=1 SV=2
397	108	P10586|PTPRF_HUMAN	235.23	24	1	7	3	18	2	2	297	117	342	5500	119	164	34	31	1	10	3	42	4	4	Carbamidomethylation; Acetylation (Protein N-term); Phosphorylation (STY)	212877	Receptor-type tyrosine-protein phosphatase F OS=Homo sapiens OX=9606 GN=PTPRF PE=1 SV=2
219	210	P31146|COR1A_HUMAN	235.21	49	22	29	14	45	35	43	256	414	305	3520	2160	1140	17	17	11	15	11	33	31	23	Carbamidomethylation; Oxidation (M); Acetylation (Protein N-term); Phosphorylation (STY)	51026	Coronin-1A OS=Homo sapiens OX=9606 GN=CORO1A PE=1 SV=4
85	314	P0DOX8|IGL1_HUMAN	233.77	68	44	44	48	48	44	64	14800	8310	18500	32600	4030	6180	10	4	71	60	82	112	39	52	Carbamidomethylation; Phosphorylation (STY)	22830	Immunoglobulin lambda-1 light chain OS=Homo sapiens OX=9606 PE=1 SV=1
22	353	Q96DA0|ZG16B_HUMAN	233.1	75	75	55	55	55	55	55	31700	34700	23600	64900	66400	46300	12	12	269	265	196	500	384	323	Oxidation (M); Phosphorylation (STY)	22739	Zymogen granule protein 16 homolog B OS=Homo sapiens OX=9606 GN=ZG16B PE=1 SV=3
270	154	Q04695|K1C17_HUMAN	232.73	50	9	20	18	47	10	12	0	313		1190			24	11	6	14	13	44	7	13	Carbamidomethylation; Phosphorylation (STY)	48106	Keratin type I cytoskeletal 17 OS=Homo sapiens OX=9606 GN=KRT17 PE=1 SV=2
265	304	P01019|ANGT_HUMAN	232.12	28	13	11	5	26	11	14	549	1200	458	10300	799	2060	11	11	9	10	2	38	9	13	Oxidation (M); Acetylation (Protein N-term); Phosphorylation (STY)	53154	Angiotensinogen OS=Homo sapiens OX=9606 GN=AGT PE=1 SV=1
120	228	P10645|CMGA_HUMAN	232.06	41	27	38	16	40	27	41	17200	21300	2950	22300	12900	19200	17	17	72	76	21	57	50	56	Oxidation (M); Phosphorylation (STY)	50688	Chromogranin-A OS=Homo sapiens OX=9606 GN=CHGA PE=1 SV=7
334	112	P23468|PTPRD_HUMAN	231.69	18	2	2	5	15	1	2	124	164	551	2260	125	158	25	20	4	4	6	35	2	5	Carbamidomethylation; Oxidation (M); Acetylation (Protein N-term); Phosphorylation (STY)	214758	Receptor-type tyrosine-protein phosphatase delta OS=Homo sapiens OX=9606 GN=PTPRD PE=1 SV=2
234	202	P19013|K2C4_HUMAN	231.68	43	9	10	24	30	20	16	344	329	1100	2480	1430	517	18	11	7	17	17	31	17	17	Carbamidomethylation; Acetylation (Protein N-term); Phosphorylation (STY)	57285	Keratin type II cytoskeletal 4 OS=Homo sapiens OX=9606 GN=KRT4 PE=1 SV=4
14	433	P06702|S10A9_HUMAN	230.78	81	81	81	75	81	81	81	60100	54500	29800	116000	97900	70500	8	8	365	321	234	835	616	424	Oxidation (M); Phosphorylation (STY)	13242	Protein S100-A9 OS=Homo sapiens OX=9606 GN=S100A9 PE=1 SV=1
314	167	P20062|TCO2_HUMAN	230.7	41	0	4	2	41	10	16		82.3	0	6390	161	299	19	19	0	3	2	39	9	7	Carbamidomethylation; Phosphorylation (STY)	47535	Transcobalamin-2 OS=Homo sapiens OX=9606 GN=TCN2 PE=1 SV=3
543	177	Q9UMF0|ICAM5_HUMAN	230.28	25	0	1	0	22	3	6		0		1590	0	36.9	15	15	0	2	0	24	1	2	Carbamidomethylation; Phosphorylation (STY)	97116	Intercellular adhesion molecule 5 OS=Homo sapiens OX=9606 GN=ICAM5 PE=1 SV=3
213	175	P02461|CO3A1_HUMAN	229.72	22	8	8	6	14	9	5	11800	6830	8810	14700	4190	4580	26	26	26	21	15	37	35	19	Carbamidomethylation; Oxidation (M); Acetylation (Protein N-term); Phosphorylation (STY)	138564	Collagen alpha-1(III) chain OS=Homo sapiens OX=9606 GN=COL3A1 PE=1 SV=4
362	129	P49641|MA2A2_HUMAN	229.54	25	1	3	0	22	1	6	13.3	147		7330	0	317	22	22	1	5	0	40	1	6	Carbamidomethylation; Acetylation (Protein N-term); Phosphorylation (STY)	130538	Alpha-mannosidase 2x OS=Homo sapiens OX=9606 GN=MAN2A2 PE=2 SV=3
77	435	P0DOY3|IGLC3_HUMAN	228.82	87	75	79	87	82	75	75	2900	4740	4100	11500	2790	4690	8	2	64	70	77	110	51	69	Carbamidomethylation; Phosphorylation (STY)	11266	Immunoglobulin lambda constant 3 OS=Homo sapiens OX=9606 GN=IGLC3 PE=1 SV=1
77	436	P0DOY2|IGLC2_HUMAN	228.82	87	75	79	87	82	75	75	2900	4740	4100	11500	2790	4690	8	2	64	70	77	110	51	69	Carbamidomethylation; Phosphorylation (STY)	11294	Immunoglobulin lambda constant 2 OS=Homo sapiens OX=9606 GN=IGLC2 PE=1 SV=1
356	187	O14594|NCAN_HUMAN	228.24	16	3	6	4	13	4	4	1560	13600	0	4100	0	116	21	20	3	8	4	34	3	6	Carbamidomethylation; Acetylation (Protein N-term); Phosphorylation (STY)	143093	Neurocan core protein OS=Homo sapiens OX=9606 GN=NCAN PE=1 SV=3
288	166	P02774|VTDB_HUMAN	228.24	45	17	22	17	45	17	22	216	855	560	2540	275	620	15	15	6	14	5	34	8	5	Carbamidomethylation; Acetylation (Protein N-term); Phosphorylation (STY)	52918	Vitamin D-binding protein OS=Homo sapiens OX=9606 GN=GC PE=1 SV=2
233	172	P05154|IPSP_HUMAN	227.34	49	20	16	11	33	21	17	881	780	824	10500	773	1550	18	18	11	11	7	45	15	14	Oxidation (M); Phosphorylation (STY)	45675	Plasma serine protease inhibitor OS=Homo sapiens OX=9606 GN=SERPINA5 PE=1 SV=3
244	153	Q09666|AHNK_HUMAN	226.13	7	2	1	4	3	3	4	4960	4170	5730	17800	7340	9460	35	35	15	6	25	22	40	42	Oxidation (M); Acetylation (Protein N-term); Phosphorylation (STY)	629114	Neuroblast differentiation-associated protein AHNAK OS=Homo sapiens OX=9606 GN=AHNAK PE=1 SV=2
210	312	P23284|PPIB_HUMAN	225.63	49	38	49	38	49	42	38	2650	2040	1430	6140	1770	2050	12	12	20	22	13	26	23	19	Carbamidomethylation; Oxidation (M); Phosphorylation (STY)	23743	Peptidyl-prolyl cis-trans isomerase B OS=Homo sapiens OX=9606 GN=PPIB PE=1 SV=2
205	309	P08294|SODE_HUMAN	224.51	64	27	33	22	64	30	27	1330	1410	943	6930	1090	2600	13	13	11	17	7	50	26	25	Carbamidomethylation; Phosphorylation (STY)	25851	Extracellular superoxide dismutase [Cu-Zn] OS=Homo sapiens OX=9606 GN=SOD3 PE=1 SV=2
311	183	P0DOX3|IGD_HUMAN	222.45	36	0	11	17	32	15	11		592	2300	3790	135	650	18	18	0	9	20	33	3	4	Carbamidomethylation; Oxidation (M); Acetylation (Protein N-term); Phosphorylation (STY)	56224	Immunoglobulin delta heavy chain OS=Homo sapiens OX=9606 PE=1 SV=1
355	185	Q08380|LG3BP_HUMAN	221.19	42	4	6	6	31	28	18	0	0	0	2920	375	209	18	18	1	2	2	29	13	8	Carbamidomethylation; Phosphorylation (STY)	65331	Galectin-3-binding protein OS=Homo sapiens OX=9606 GN=LGALS3BP PE=1 SV=1
212	163	P16870|CBPE_HUMAN	220.3	42	16	22	10	42	14	22	748	1240	685	11800	839	2120	18	18	15	23	7	42	17	21	Carbamidomethylation; Phosphorylation (STY)	53151	Carboxypeptidase E OS=Homo sapiens OX=9606 GN=CPE PE=1 SV=1
154	302	Q8N4F0|BPIB2_HUMAN	218.71	45	34	24	29	34	40	27	678	638	446	4360	2590	1310	12	12	25	22	18	45	53	28	Carbamidomethylation; Oxidation (M); Phosphorylation (STY)	49173	BPI fold-containing family B member 2 OS=Homo sapiens OX=9606 GN=BPIFB2 PE=1 SV=2
248	173	Q06481|APLP2_HUMAN	217	28	8	12	12	27	6	7	297	268	121	2460	131	0	18	16	11	18	11	47	8	11	Carbamidomethylation; Oxidation (M); Acetylation (Protein N-term); Phosphorylation (STY)	86956	Amyloid-like protein 2 OS=Homo sapiens OX=9606 GN=APLP2 PE=1 SV=2
429	151	Q9UBX1|CATF_HUMAN	217	51	21	13	3	43	2	17	26.4	41.3	10100	2780	0	156	23	23	4	6	1	29	3	6	Carbamidomethylation; Oxidation (M); Acetylation (Protein N-term); Phosphorylation (STY)	53366	Cathepsin F OS=Homo sapiens OX=9606 GN=CTSF PE=1 SV=1
203	226	P0DOX2|IGA2_HUMAN	215.83	48	18	22	19	42	17	17	268	712	104	1040			15	4	14	16	19	42	29	18	Carbamidomethylation; Acetylation (Protein N-term); Phosphorylation (STY)	48934	Immunoglobulin alpha-2 heavy chain OS=Homo sapiens OX=9606 PE=1 SV=2
261	295	Q08495|DEMA_HUMAN	215.81	38	12	20	7	11	2	33	124	2860	137	375	0	24000	16	16	5	20	2	4	1	83	Carbamidomethylation; Oxidation (M); Phosphorylation (STY)	45514	Dematin OS=Homo sapiens OX=9606 GN=DMTN PE=1 SV=3
373	152	P15924|DESP_HUMAN	214.84	16	4	3	3	9	4	3	943	1770	2950	2040	874	1380	36	36	9	12	12	27	7	10	Carbamidomethylation; Oxidation (M); Acetylation (Protein N-term); Phosphorylation (STY)	331774	Desmoplakin OS=Homo sapiens OX=9606 GN=DSP PE=1 SV=3
249	307	P04083|ANXA1_HUMAN	213.31	36	19	25	28	32	25	32	1030	738	483	3220	3350	1730	8	8	12	12	15	19	15	12	Carbamidomethylation; Acetylation (Protein N-term); Phosphorylation (STY)	38714	Annexin A1 OS=Homo sapiens OX=9606 GN=ANXA1 PE=1 SV=2
319	214	Q8WZA1|PMGT1_HUMAN	213.16	22	5	5	3	22	5	9	1610	2890	4540	7400	3810	4350	13	13	6	10	10	26	9	10	Carbamidomethylation; Phosphorylation (STY)	75252	Protein O-linked-mannose beta-1 2-N-acetylglucosaminyltransferase 1 OS=Homo sapiens OX=9606 GN=POMGNT1 PE=1 SV=2
309	164	Q9P2S2|NRX2A_HUMAN	212.63	17	2	2	3	15	1	5	28700	0	67.9	2000		65.7	25	17	4	5	8	38	2	16	Carbamidomethylation; Oxidation (M); Acetylation (Protein N-term); Phosphorylation (STY)	184981	Neurexin-2 OS=Homo sapiens OX=9606 GN=NRXN2 PE=2 SV=1
440	218	O15240|VGF_HUMAN	212.57	31	2	7	2	25	8	13	531	492	2680	2900	78.2	214	17	17	3	2	3	29	3	9	Oxidation (M); Phosphorylation (STY)	67258	Neurosecretory protein VGF OS=Homo sapiens OX=9606 GN=VGF PE=1 SV=2
141	299	P23528|COF1_HUMAN	212.55	69	37	54	27	65	53	54	20000	16900	18500	18700	29100	29600	13	10	37	39	34	32	48	46	Carbamidomethylation; Acetylation (Protein N-term); Phosphorylation (STY)	18502	Cofilin-1 OS=Homo sapiens OX=9606 GN=CFL1 PE=1 SV=3
58	434	P01034|CYTC_HUMAN	212.54	67	48	48	52	62	66	48	23300	26600	25500	90900	32700	40500	10	10	82	114	97	212	115	118	Carbamidomethylation; Oxidation (M); Phosphorylation (STY)	15799	Cystatin-C OS=Homo sapiens OX=9606 GN=CST3 PE=1 SV=1
306	225	P27918|PROP_HUMAN	212.08	38	3	0	38	31	8	16	62.8		5750	3530	125	832	14	14	1	0	32	17	3	11	Carbamidomethylation; Phosphorylation (STY)	51276	Properdin OS=Homo sapiens OX=9606 GN=CFP PE=1 SV=2
240	401	P41222|PTGDS_HUMAN	211.9	53	19	39	13	39	16	25	3040	3370	2070	20700	3200	6680	9	9	7	12	8	42	13	15	Carbamidomethylation; Oxidation (M); Phosphorylation (STY)	21029	Prostaglandin-H2 D-isomerase OS=Homo sapiens OX=9606 GN=PTGDS PE=1 SV=1
305	195	Q13217|DNJC3_HUMAN	211.31	45	12	15	13	39	18	15	396	283	1620	2640	71.7	1110	19	19	7	9	16	31	9	10	Carbamidomethylation; Phosphorylation (STY)	57580	DnaJ homolog subfamily C member 3 OS=Homo sapiens OX=9606 GN=DNAJC3 PE=1 SV=1
398	243	P13639|EF2_HUMAN	210.67	22	3	4	2	16	13	5	662	510	152	1890	2960	1500	14	14	7	5	4	20	17	13	Carbamidomethylation; Oxidation (M); Acetylation (Protein N-term); Phosphorylation (STY)	95338	Elongation factor 2 OS=Homo sapiens OX=9606 GN=EEF2 PE=1 SV=4
72	375	P02765|FETUA_HUMAN	210.52	33	18	18	19	30	16	16	60900	54900	19700	27300	32000	28800	10	10	122	117	61	62	67	72	Carbamidomethylation; Oxidation (M); Acetylation (Protein N-term); Phosphorylation (STY)	39341	Alpha-2-HS-glycoprotein OS=Homo sapiens OX=9606 GN=AHSG PE=1 SV=2
218	245	P19338|NUCL_HUMAN	210	30	6	0	14	29	15	18	0		1300	2770	1040	3650	14	14	6	0	18	43	27	36	Oxidation (M); Acetylation (Protein N-term); Phosphorylation (STY)	76615	Nucleolin OS=Homo sapiens OX=9606 GN=NCL PE=1 SV=3
267	263	Q14C87|T132D_HUMAN	209.97	19	5	7	3	12	4	8	7130	4760	5420	10600	5100	7380	16	15	16	22	10	41	14	19	Carbamidomethylation; Phosphorylation (STY)	122309	Transmembrane protein 132D OS=Homo sapiens OX=9606 GN=TMEM132D PE=1 SV=1
246	209	Q99972|MYOC_HUMAN	209.27	38	7	17	13	30	14	19	4600	3340	3030	12800	6670	10400	15	15	10	16	7	34	18	25	Carbamidomethylation; Oxidation (M); Phosphorylation (STY)	56972	Myocilin OS=Homo sapiens OX=9606 GN=MYOC PE=1 SV=2
296	237	P51884|LUM_HUMAN	209.26	41	23	20	12	41	23	21	912	1130	578	5730	896	1340	12	12	9	11	3	25	9	9	Carbamidomethylation; Acetylation (Protein N-term); Phosphorylation (STY)	38429	Lumican OS=Homo sapiens OX=9606 GN=LUM PE=1 SV=2
430	246	O14514|AGRB1_HUMAN	208.21	19	6	3	5	11	2	2	1220	11900	1140	1840	246	520	17	17	8	5	3	18	4	5	Carbamidomethylation; Oxidation (M); Acetylation (Protein N-term); Phosphorylation (STY)	173500	Adhesion G protein-coupled receptor B1 OS=Homo sapiens OX=9606 GN=ADGRB1 PE=1 SV=2
354	208	Q92743|HTRA1_HUMAN	208.19	41	8	10	14	41	12	16	107	125	101	2310	200	470	17	17	4	6	4	26	4	11	Carbamidomethylation; Oxidation (M); Phosphorylation (STY)	51287	Serine protease HTRA1 OS=Homo sapiens OX=9606 GN=HTRA1 PE=1 SV=1
295	482	P63104|1433Z_HUMAN	206.63	42	19	19	19	42	19	19	693	288	79.5	2660	2330	1240	8	7	10	8	5	23	14	8	Carbamidomethylation; Oxidation (M); Phosphorylation (STY)	27745	14-3-3 protein zeta/delta OS=Homo sapiens OX=9606 GN=YWHAZ PE=1 SV=1
468	181	Q9Y6N7|ROBO1_HUMAN	206.58	16	3	4	1	12	1	2	41.1	1290	0	2070	0	221	20	20	4	6	2	21	1	5	Carbamidomethylation; Oxidation (M); Acetylation (Protein N-term); Phosphorylation (STY)	180928	Roundabout homolog 1 OS=Homo sapiens OX=9606 GN=ROBO1 PE=1 SV=1
341	305	Q96PD5|PGRP2_HUMAN	205.38	26	10	11	11	24	14	13	224	398	804	3320	453	1330	10	10	5	6	8	20	7	11	Carbamidomethylation; Acetylation (Protein N-term); Phosphorylation (STY)	62217	N-acetylmuramoyl-L-alanine amidase OS=Homo sapiens OX=9606 GN=PGLYRP2 PE=1 SV=1
402	248	P01011|AACT_HUMAN	205.02	31	0	6	8	31	5	8		0	868	3070	0	49.8	12	12	0	3	2	24	2	9	Phosphorylation (STY)	47651	Alpha-1-antichymotrypsin OS=Homo sapiens OX=9606 GN=SERPINA3 PE=1 SV=2
374	199	P46940|IQGA1_HUMAN	204.91	22	4	5	3	17	12	3	8350	5350	17200	17100	7520	9510	20	20	11	5	5	31	20	7	Carbamidomethylation; Oxidation (M); Acetylation (Protein N-term); Phosphorylation (STY)	189251	Ras GTPase-activating-like protein IQGAP1 OS=Homo sapiens OX=9606 GN=IQGAP1 PE=1 SV=1
413	205	Q08629|TICN1_HUMAN	204.85	45	8	10	8	37	10	12	0	72.8	137	3120	0	370	15	14	1	3	5	22	1	7	Carbamidomethylation; Oxidation (M); Phosphorylation (STY)	49124	Testican-1 OS=Homo sapiens OX=9606 GN=SPOCK1 PE=1 SV=1
399	196	P0DMV8|HS71A_HUMAN	203.17	48	7	6	4	26	21	16	167	221	0	1800	14	103	19	13	4	3	2	18	11	8	Carbamidomethylation; Oxidation (M); Acetylation (Protein N-term); Phosphorylation (STY)	70052	Heat shock 70 kDa protein 1A OS=Homo sapiens OX=9606 GN=HSPA1A PE=1 SV=1
399	197	P0DMV9|HS71B_HUMAN	203.17	48	7	6	4	26	21	16	167	221	0	1800	14	103	19	13	4	3	2	18	11	8	Carbamidomethylation; Oxidation (M); Acetylation (Protein N-term); Phosphorylation (STY)	70052	Heat shock 70 kDa protein 1B OS=Homo sapiens OX=9606 GN=HSPA1B PE=1 SV=1
466	179	A1L4H1|SRCRL_HUMAN	203.1	19	1	3	2	14	2	3	0	0	21.4	1280	134	351	19	19	1	1	2	25	1	5	Carbamidomethylation; Oxidation (M); Acetylation (Protein N-term); Phosphorylation (STY)	165742	Soluble scavenger receptor cysteine-rich domain-containing protein SSC5D OS=Homo sapiens OX=9606 GN=SSC5D PE=1 SV=3
310	238	O95965|ITGBL_HUMAN	202.91	44	14	10	31	31	14	21	116	162	203	1760	141	475	13	13	9	6	10	16	7	10	Carbamidomethylation; Acetylation (Protein N-term); Phosphorylation (STY)	53921	Integrin beta-like protein 1 OS=Homo sapiens OX=9606 GN=ITGBL1 PE=2 SV=1
487	261	Q12906|ILF3_HUMAN	202.81	26	0	1	9	17	8	9		34.8	282	1520	226	721	15	15	0	1	3	23	2	7	Phosphorylation (STY)	95339	Interleukin enhancer-binding factor 3 OS=Homo sapiens OX=9606 GN=ILF3 PE=1 SV=3
291	168	Q9UQ35|SRRM2_HUMAN	202.73	23	2	1	7	9	9	11	173	6190	2000	3020	4100	3530	46	46	3	3	17	29	26	37	Carbamidomethylation; Acetylation (Protein N-term); Phosphorylation (STY)	299616	Serine/arginine repetitive matrix protein 2 OS=Homo sapiens OX=9606 GN=SRRM2 PE=1 SV=2
433	289	P61158|ARP3_HUMAN	202.6	44	12	27	19	44	21	24	151	52.4	80.8	1900	730	363	10	10	3	6	3	13	8	6	Carbamidomethylation; Phosphorylation (STY)	47371	Actin-related protein 3 OS=Homo sapiens OX=9606 GN=ACTR3 PE=1 SV=3
390	232	P26572|MGAT1_HUMAN	202.49	31	3	2	5	31	8	10	0	0	0	3500	92.6	175	12	12	2	1	3	19	5	6	Carbamidomethylation; Phosphorylation (STY)	50878	Alpha-1 3-mannosyl-glycoprotein 2-beta-N-acetylglucosaminyltransferase OS=Homo sapiens OX=9606 GN=MGAT1 PE=1 SV=2
74	474	P49908|SEPP1_HUMAN	202.38	28	15	13	20	15	13	21	41600	33200	54500	41600	46800	61200	12	12	96	83	94	73	88	103	Carbamidomethylation; Oxidation (M); Acetylation (Protein N-term); Phosphorylation (STY)	43174	Selenoprotein P OS=Homo sapiens OX=9606 GN=SELENOP PE=1 SV=3
456	242	Q9Y490|TLN1_HUMAN	202.07	15	2	0	4	9	6	4	53.5	0	163	559	218	156	18	16	2	3	8	13	7	5	Carbamidomethylation; Oxidation (M); Acetylation (Protein N-term); Phosphorylation (STY)	269765	Talin-1 OS=Homo sapiens OX=9606 GN=TLN1 PE=1 SV=3
349	380	P15291|B4GT1_HUMAN	201.98	34	11	8	8	28	8	17	1380	635	1030	2140	1460	3640	11	11	8	4	8	16	8	10	Carbamidomethylation; Oxidation (M); Phosphorylation (STY)	43920	Beta-1 4-galactosyltransferase 1 OS=Homo sapiens OX=9606 GN=B4GALT1 PE=1 SV=5
289	162	Q9H2X0|CHRD_HUMAN	201.96	29	7	5	7	27	7	7	496	0	633	4530	1470	609	21	21	7	7	6	38	13	14	Carbamidomethylation; Acetylation (Protein N-term); Phosphorylation (STY)	102032	Chordin OS=Homo sapiens OX=9606 GN=CHRD PE=1 SV=2
114	417	P35542|SAA4_HUMAN	201.71	65	42	33	65	62	45	45	3870	3910	51200	38200	6840	13500	10	10	25	27	121	80	38	51	Carbamidomethylation; Oxidation (M); Acetylation (Protein N-term); Phosphorylation (STY)	14747	Serum amyloid A-4 protein OS=Homo sapiens OX=9606 GN=SAA4 PE=1 SV=2
173	334	Q92563|TICN2_HUMAN	200.62	30	8	10	8	27	15	11	7940	7070	4660	4680	6740	8230	12	12	37	35	30	25	28	36	Carbamidomethylation; Oxidation (M); Acetylation (Protein N-term); Phosphorylation (STY)	46779	Testican-2 OS=Homo sapiens OX=9606 GN=SPOCK2 PE=1 SV=1
347	253	Q9UNW1|MINP1_HUMAN	200.58	29	5	12	8	26	15	8	4740	3560	4350	2740	1110	6660	11	11	6	11	11	18	9	9	Carbamidomethylation; Acetylation (Protein N-term); Phosphorylation (STY)	55051	Multiple inositol polyphosphate phosphatase 1 OS=Homo sapiens OX=9606 GN=MINPP1 PE=1 SV=1
312	266	P80303|NUCB2_HUMAN	200.41	38	13	10	11	34	17	12	224	203	187	2750	547	435	12	12	10	7	2	23	13	8	Oxidation (M); Acetylation (Protein N-term); Phosphorylation (STY)	50223	Nucleobindin-2 OS=Homo sapiens OX=9606 GN=NUCB2 PE=1 SV=3
217	294	P35611|ADDA_HUMAN	199.94	26	18	15	10	16	6	25	555	2550	549	1330	371	18300	14	12	12	24	11	13	13	54	Carbamidomethylation; Acetylation (Protein N-term); Phosphorylation (STY)	80955	Alpha-adducin OS=Homo sapiens OX=9606 GN=ADD1 PE=1 SV=2
352	240	P98095|FBLN2_HUMAN	199.17	16	7	5	5	13	5	7	420	293	256	2580	275	514	13	13	7	3	5	19	3	10	Carbamidomethylation; Acetylation (Protein N-term); Phosphorylation (STY)	126573	Fibulin-2 OS=Homo sapiens OX=9606 GN=FBLN2 PE=1 SV=2
300	532	P01344|IGF2_HUMAN	199.09	29	19	23	21	27	23	19	803	1520	1080	14900	1350	3220	7	7	4	6	10	27	9	9	Carbamidomethylation; Phosphorylation (STY)	20140	Insulin-like growth factor II OS=Homo sapiens OX=9606 GN=IGF2 PE=1 SV=1
328	265	Q9UJJ9|GNPTG_HUMAN	198.97	54	27	27	24	46	20	28	704	990	1920	9170	727	2560	12	12	9	7	10	26	6	19	Carbamidomethylation; Acetylation (Protein N-term); Phosphorylation (STY)	33974	N-acetylglucosamine-1-phosphotransferase subunit gamma OS=Homo sapiens OX=9606 GN=GNPTG PE=1 SV=1
224	296	P01877|IGHA2_HUMAN	198.77	45	15	19	22	45	20	20				0			11	1	11	13	20	33	30	18	Carbamidomethylation; Phosphorylation (STY)	36591	Immunoglobulin heavy constant alpha 2 OS=Homo sapiens OX=9606 GN=IGHA2 PE=1 SV=4
211	276	P36980|FHR2_HUMAN	198.36	55	33	29	45	39	28	33	1640	660	4520	1210	959	1620	10	5	18	17	25	19	21	21	Carbamidomethylation; Oxidation (M); Phosphorylation (STY)	30651	Complement factor H-related protein 2 OS=Homo sapiens OX=9606 GN=CFHR2 PE=1 SV=1
277	337	E9PAV3|NACAM_HUMAN	198.04	8	2	2	2	3	6	2	0	51.6	378	471	2480	5460	9	9	2	4	8	7	24	33	Phosphorylation (STY)	205419	Nascent polypeptide-associated complex subunit alpha muscle-specific form OS=Homo sapiens OX=9606 GN=NACA PE=1 SV=1
333	239	P09668|CATH_HUMAN	197.47	53	16	15	4	51	27	16	153	117	0	3170	493	317	12	12	7	8	3	26	10	7	Carbamidomethylation; Oxidation (M); Phosphorylation (STY)	37394	Pro-cathepsin H OS=Homo sapiens OX=9606 GN=CTSH PE=1 SV=4
252	625	P25815|S100P_HUMAN	196.97	93	71	57	79	84	72	71	2230	1980	1490	4680	4300	2890	9	9	13	6	11	27	22	16	Carbamidomethylation; Oxidation (M); Acetylation (Protein N-term); Phosphorylation (STY)	10400	Protein S100-P OS=Homo sapiens OX=9606 GN=S100P PE=1 SV=2
418	206	P33908|MA1A1_HUMAN	196.42	24	6	7	6	24	6	9	682	1070	0	15000	50.4	3080	17	17	5	8	3	31	5	12	Phosphorylation (STY)	72969	Mannosyl-oligosaccharide 1 2-alpha-mannosidase IA OS=Homo sapiens OX=9606 GN=MAN1A1 PE=1 SV=3
438	190	P11277|SPTB1_HUMAN	195.52	15	1	4	0	5	1	11	303	3030	0	5370	140	5090	23	23	2	10	1	7	1	28	Carbamidomethylation; Oxidation (M); Acetylation (Protein N-term); Phosphorylation (STY)	246466	Spectrin beta chain erythrocytic OS=Homo sapiens OX=9606 GN=SPTB PE=1 SV=5
640	182	Q9NY15|STAB1_HUMAN	195.14	14	1	2	0	12	1	1	23.4	0		1250	24	0	20	20	1	2	0	21	1	1	Carbamidomethylation; Acetylation (Protein N-term); Phosphorylation (STY)	275480	Stabilin-1 OS=Homo sapiens OX=9606 GN=STAB1 PE=1 SV=3
117	522	P20396|TRH_HUMAN	194.45	35	31	26	31	26	29	35	38200	12600	19600	12500	29800	34300	8	8	89	48	45	46	63	70	Oxidation (M); Phosphorylation (STY)	27404	Pro-thyrotropin-releasing hormone OS=Homo sapiens OX=9606 GN=TRH PE=1 SV=1
447	278	P06737|PYGL_HUMAN	194.38	21	3	3	3	20	13	3	45.9	0	0	691	613	72.4	12	12	1	1	1	18	10	1	Carbamidomethylation; Oxidation (M); Acetylation (Protein N-term); Phosphorylation (STY)	97149	Glycogen phosphorylase liver form OS=Homo sapiens OX=9606 GN=PYGL PE=1 SV=4
479	180	P12110|CO6A2_HUMAN	194.37	22	3	2	3	18	3	1	0	40.9	24.4	1740	10.6	0	17	17	2	2	2	22	3	2	Carbamidomethylation; Acetylation (Protein N-term); Phosphorylation (STY)	108579	Collagen alpha-2(VI) chain OS=Homo sapiens OX=9606 GN=COL6A2 PE=1 SV=4
666	220	O15031|PLXB2_HUMAN	194.26	12	1	0	2	12	2	1	10800		0	20100	0	0	15	15	1	0	1	18	1	1	Carbamidomethylation; Oxidation (M); Acetylation (Protein N-term); Phosphorylation (STY)	205126	Plexin-B2 OS=Homo sapiens OX=9606 GN=PLXNB2 PE=1 SV=3
379	718	P02766|TTHY_HUMAN	194.12	61	24	24	24	40	60	24	152	1160	838	4260	647	1260	6	6	4	4	6	12	10	6	Carbamidomethylation; Phosphorylation (STY)	15887	Transthyretin OS=Homo sapiens OX=9606 GN=TTR PE=1 SV=1
214	303	P12035|K2C3_HUMAN	193.81	25	4	3	16	23	6	9			1250	1030		0	17	4	11	19	19	42	13	14	Carbamidomethylation; Oxidation (M); Acetylation (Protein N-term); Phosphorylation (STY)	64417	Keratin type II cytoskeletal 3 OS=Homo sapiens OX=9606 GN=KRT3 PE=1 SV=3
338	269	P35612|ADDB_HUMAN	193.73	23	4	17	6	2	2	17	1080	956	180	47.5	75.8	4900	16	14	4	18	5	1	4	38	Carbamidomethylation; Oxidation (M); Acetylation (Protein N-term); Phosphorylation (STY)	80854	Beta-adducin OS=Homo sapiens OX=9606 GN=ADD2 PE=1 SV=3
575	184	P02549|SPTA1_HUMAN	192.22	16	1	3	0	3	3	10	216	251		157	128	1850	27	27	1	8	0	7	4	21	Carbamidomethylation; Oxidation (M); Acetylation (Protein N-term); Phosphorylation (STY)	280013	Spectrin alpha chain erythrocytic 1 OS=Homo sapiens OX=9606 GN=SPTA1 PE=1 SV=5
316	285	P04745|AMY1_HUMAN	190.6	30	10	9	5	23	20	5	253	38.5	82.1	1990	1450	632	12	12	5	5	4	24	19	4	Carbamidomethylation; Oxidation (M); Acetylation (Protein N-term); Phosphorylation (STY)	57768	Alpha-amylase 1 OS=Homo sapiens OX=9606 GN=AMY1A PE=1 SV=2
458	215	P11142|HSP7C_HUMAN	189.67	32	5	7	6	24	12	10	0	130	0	1040	85.1	0	17	13	2	3	3	21	7	5	Carbamidomethylation; Oxidation (M); Acetylation (Protein N-term); Phosphorylation (STY)	70898	Heat shock cognate 71 kDa protein OS=Homo sapiens OX=9606 GN=HSPA8 PE=1 SV=1
505	203	O15394|NCAM2_HUMAN	189.53	26	0	3	0	22	4	1		0		1750	79.2	0	18	18	0	1	0	27	2	1	Carbamidomethylation; Oxidation (M); Acetylation (Protein N-term); Phosphorylation (STY)	93046	Neural cell adhesion molecule 2 OS=Homo sapiens OX=9606 GN=NCAM2 PE=1 SV=2
326	270	P00742|FA10_HUMAN	188.78	35	8	8	15	29	11	9	412	396	370	2050	758	1010	12	12	5	13	6	20	6	9	Carbamidomethylation; Oxidation (M); Phosphorylation (STY)	54732	Coagulation factor X OS=Homo sapiens OX=9606 GN=F10 PE=1 SV=2
540	477	Q9UHG2|PCSK1_HUMAN	188.49	37	0	12	13	31	13	12		80.1	1430	13000	2940	948	10	10	0	2	4	24	4	6	Acetylation (Protein N-term); Phosphorylation (STY)	27372	ProSAAS OS=Homo sapiens OX=9606 GN=PCSK1N PE=1 SV=1
405	360	P20851|C4BPB_HUMAN	188.3	31	0	0	31	23	0	21			6160	2200		298	7	7	0	0	26	8	0	5	Carbamidomethylation; Oxidation (M); Acetylation (Protein N-term); Phosphorylation (STY)	28357	C4b-binding protein beta chain OS=Homo sapiens OX=9606 GN=C4BPB PE=1 SV=1
467	216	Q7Z7G0|TARSH_HUMAN	188.26	18	4	4	7	16	6	6	131	359	775	2260	653	1080	12	12	3	4	8	21	3	7	Carbamidomethylation; Acetylation (Protein N-term); Phosphorylation (STY)	118642	Target of Nesh-SH3 OS=Homo sapiens OX=9606 GN=ABI3BP PE=1 SV=1
204	571	P01189|COLI_HUMAN	188.09	37	30	29	19	33	29	37	7580	5800	4250	4050	5820	5160	10	10	26	28	21	27	21	26	Carbamidomethylation; Oxidation (M); Acetylation (Protein N-term); Phosphorylation (STY)	29424	Pro-opiomelanocortin OS=Homo sapiens OX=9606 GN=POMC PE=1 SV=2
401	280	Q9NX62|IMPA3_HUMAN	188.06	35	7	7	6	35	7	7	276	160	0	1810	152	227	11	11	6	5	2	20	3	5	Carbamidomethylation; Oxidation (M); Phosphorylation (STY)	38681	Inositol monophosphatase 3 OS=Homo sapiens OX=9606 GN=IMPAD1 PE=1 SV=1
452	350	P30086|PEBP1_HUMAN	187.6	63	32	19	19	63	8	19	712	587	117	1380	403	350	7	7	7	5	2	15	2	4	Carbamidomethylation; Phosphorylation (STY)	21057	Phosphatidylethanolamine-binding protein 1 OS=Homo sapiens OX=9606 GN=PEBP1 PE=1 SV=3
394	221	Q8N475|FSTL5_HUMAN	187.27	23	9	11	4	17	5	6	868	370	600	1390	1220	1100	15	15	8	6	6	15	6	6	Carbamidomethylation; Oxidation (M); Acetylation (Protein N-term); Phosphorylation (STY)	95751	Follistatin-related protein 5 OS=Homo sapiens OX=9606 GN=FSTL5 PE=2 SV=2
229	456	Q99969|RARR2_HUMAN	185.16	56	50	50	52	55	50	50	1680	2430	2800	19000	2900	4100	9	9	9	14	15	38	14	16	Carbamidomethylation; Phosphorylation (STY)	18618	Retinoic acid receptor responder protein 2 OS=Homo sapiens OX=9606 GN=RARRES2 PE=1 SV=1
254	463	P07910|HNRPC_HUMAN	185	35	12	12	22	34	22	26	1450	133	1340	4550	1320	2580	9	9	5	1	31	32	9	24	Oxidation (M); Phosphorylation (STY)	33670	Heterogeneous nuclear ribonucleoproteins C1/C2 OS=Homo sapiens OX=9606 GN=HNRNPC PE=1 SV=4
344	359	Q96IY4|CBPB2_HUMAN	184.59	22	13	13	13	22	15	13	13	40	98	4950	52.1	340	7	7	6	6	4	20	7	7	Carbamidomethylation; Phosphorylation (STY)	48424	Carboxypeptidase B2 OS=Homo sapiens OX=9606 GN=CPB2 PE=1 SV=2
318	511	P07360|CO8G_HUMAN	184.48	34	6	6	30	27	14	23	98.2	171	1810	5330	271	287	6	6	2	4	19	25	4	8	Carbamidomethylation; Phosphorylation (STY)	22277	Complement component C8 gamma chain OS=Homo sapiens OX=9606 GN=C8G PE=1 SV=3
436	368	O94804|STK10_HUMAN	184.2	14	2	5	7	6	10	11	38.4	57.8	307	587	1310	801	11	11	1	4	5	8	12	10	Carbamidomethylation; Oxidation (M); Acetylation (Protein N-term); Phosphorylation (STY)	112135	Serine/threonine-protein kinase 10 OS=Homo sapiens OX=9606 GN=STK10 PE=1 SV=1
620	335	P07339|CATD_HUMAN	183.42	37	14	0	2	27	7	5	0		42.3	1820	39.2	2680	11	11	3	0	1	16	2	2	Carbamidomethylation; Oxidation (M); Phosphorylation (STY)	44552	Cathepsin D OS=Homo sapiens OX=9606 GN=CTSD PE=1 SV=1
258	549	P13611|CSPG2_HUMAN	183.35	9	3	4	4	1	3	4	8330	9420	4230	5470	9820	11000	17	17	25	14	15	14	23	18	Oxidation (M); Acetylation (Protein N-term); Phosphorylation (STY)	372821	Versican core protein OS=Homo sapiens OX=9606 GN=VCAN PE=1 SV=3
340	297	P08727|K1C19_HUMAN	183.31	27	4	6	8	27	12	8				29.2			12	1	3	4	5	27	9	8	Oxidation (M); Phosphorylation (STY)	44106	Keratin type I cytoskeletal 19 OS=Homo sapiens OX=9606 GN=KRT19 PE=1 SV=4
486	355	P22061|PIMT_HUMAN	182.97	39	13	17	8	35	8	28	117	49.2	109	1140	73.8	277	8	8	2	4	1	13	1	6	Oxidation (M); Phosphorylation (STY)	24636	Protein-L-isoaspartate(D-aspartate) O-methyltransferase OS=Homo sapiens OX=9606 GN=PCMT1 PE=1 SV=4
188	429	P02747|C1QC_HUMAN	182.82	37	21	18	33	37	25	33	1430	729	15300	30300	4020	10500	7	7	10	10	33	48	14	26	Carbamidomethylation; Oxidation (M); Phosphorylation (STY)	25774	Complement C1q subcomponent subunit C OS=Homo sapiens OX=9606 GN=C1QC PE=1 SV=3
478	311	Q96B86|RGMA_HUMAN	182.69	35	7	10	7	34	5	14	4230	4640	1090	5930	6170	4170	10	10	7	10	3	17	6	9	Carbamidomethylation; Acetylation (Protein N-term); Phosphorylation (STY)	49347	Repulsive guidance molecule A OS=Homo sapiens OX=9606 GN=RGMA PE=1 SV=3
353	643	Q95604|1C17_HUMAN	181.45	24	10	0	17	24	13	19	53.4		541	1710	4070	46.3	6	3	3	0	11	18	19	7	Carbamidomethylation; Acetylation (Protein N-term); Phosphorylation (STY)	41238	HLA class I histocompatibility antigen Cw-17 alpha chain OS=Homo sapiens OX=9606 GN=HLA-C PE=1 SV=1
353	651	Q29963|1C06_HUMAN	181.45	21	7	0	13	21	13	16	53.4		541	1710	4070	46.3	5	3	2	0	8	16	19	6	Carbamidomethylation; Phosphorylation (STY)	40969	HLA class I histocompatibility antigen Cw-6 alpha chain OS=Homo sapiens OX=9606 GN=HLA-C PE=1 SV=2
353	662	P30508|1C12_HUMAN	181.45	21	7	0	13	21	13	16	53.4		541	1710	4070	46.3	5	3	2	0	8	16	19	6	Carbamidomethylation; Phosphorylation (STY)	40886	HLA class I histocompatibility antigen Cw-12 alpha chain OS=Homo sapiens OX=9606 GN=HLA-C PE=1 SV=2
353	663	Q9TNN7|1C05_HUMAN	181.45	28	14	0	13	21	13	16	63.8		541	1710	4070	46.3	6	4	3	0	8	16	19	6	Carbamidomethylation; Phosphorylation (STY)	40912	HLA class I histocompatibility antigen Cw-5 alpha chain OS=Homo sapiens OX=9606 GN=HLA-C PE=1 SV=1
353	671	P30505|1C08_HUMAN	181.45	28	14	0	13	21	13	16	63.8		541	1710	4070	46.3	6	4	3	0	8	16	19	6	Carbamidomethylation; Phosphorylation (STY)	40773	HLA class I histocompatibility antigen Cw-8 alpha chain OS=Homo sapiens OX=9606 GN=HLA-C PE=1 SV=1
353	735	Q07000|1C15_HUMAN	181.45	16	7	0	13	16	13	16	53.4		541	1480	4070	46.3	4	2	2	0	8	15	19	6	Carbamidomethylation; Phosphorylation (STY)	40863	HLA class I histocompatibility antigen Cw-15 alpha chain OS=Homo sapiens OX=9606 GN=HLA-C PE=1 SV=1
144	301	P10636|TAU_HUMAN	181.32	29	23	15	22	19	23	17	4800	2670	12700	5790	2350	9070	19	19	45	51	45	37	36	41	Carbamidomethylation; Oxidation (M); Acetylation (Protein N-term); Phosphorylation (STY)	78928	Microtubule-associated protein tau OS=Homo sapiens OX=9606 GN=MAPT PE=1 SV=5
253	443	P81605|DCD_HUMAN	180.29	54	47	54	54	32	47	47	958	1910	3300	6260	1280	2310	9	9	12	21	20	16	12	16	Phosphorylation (STY)	11284	Dermcidin OS=Homo sapiens OX=9606 GN=DCD PE=1 SV=2
293	426	P49006|MRP_HUMAN	178.88	63	25	43	39	61	18	37	1090	1220	968	3450	714	1160	8	8	13	23	12	14	3	13	Carbamidomethylation; Acetylation (Protein N-term); Phosphorylation (STY)	19529	MARCKS-related protein OS=Homo sapiens OX=9606 GN=MARCKSL1 PE=1 SV=2
660	291	Q06323|PSME1_HUMAN	178.63	45	0	0	0	40	8	0				2320	19		11	11	0	0	0	15	1	0	Carbamidomethylation; Phosphorylation (STY)	28723	Proteasome activator complex subunit 1 OS=Homo sapiens OX=9606 GN=PSME1 PE=1 SV=1
557	345	Q15063|POSTN_HUMAN	178.53	19	2	2	6	14	6	2	52.7	0	288	1920	492	58.2	12	12	2	1	5	12	3	1	Carbamidomethylation; Acetylation (Protein N-term); Phosphorylation (STY)	93314	Periostin OS=Homo sapiens OX=9606 GN=POSTN PE=1 SV=2
255	290	P09972|ALDOC_HUMAN	178.49	43	18	20	10	35	18	21	2350	2560	1270	4730	1030	2160	12	8	12	20	9	37	10	9	Carbamidomethylation; Oxidation (M); Acetylation (Protein N-term); Phosphorylation (STY)	39456	Fructose-bisphosphate aldolase C OS=Homo sapiens OX=9606 GN=ALDOC PE=1 SV=2
278	323	Q6UX73|CP089_HUMAN	178.32	28	18	15	13	25	13	15	1180	1450	1120	4710	2350	2360	10	10	9	13	9	27	12	13	Carbamidomethylation; Oxidation (M); Phosphorylation (STY)	45391	UPF0764 protein C16orf89 OS=Homo sapiens OX=9606 GN=C16orf89 PE=1 SV=2
194	363	Q01546|K22O_HUMAN	177.84	21	9	4	15	9	6	6	214		208				14	3	13	24	27	40	14	15	Carbamidomethylation; Oxidation (M); Acetylation (Protein N-term); Phosphorylation (STY)	65841	Keratin type II cytoskeletal 2 oral OS=Homo sapiens OX=9606 GN=KRT76 PE=1 SV=2
238	230	Q8IYB3|SRRM1_HUMAN	176.83	26	5	1	9	11	17	23	0	0	1120	4200	2510	4860	27	27	3	1	19	23	35	55	Acetylation (Protein N-term); Phosphorylation (STY)	102335	Serine/arginine repetitive matrix protein 1 OS=Homo sapiens OX=9606 GN=SRRM1 PE=1 SV=2
282	723	Q4ZHG4|FNDC1_HUMAN	176.52	6	6	4	3	3	3	3	3900	1370	376	445	1830	848	7	7	21	19	5	6	16	9	Oxidation (M); Phosphorylation (STY)	205557	Fibronectin type III domain-containing protein 1 OS=Homo sapiens OX=9606 GN=FNDC1 PE=2 SV=4
226	472	O76061|STC2_HUMAN	175.65	26	20	24	21	25	21	24	5690	10300	1260	8220	3440	4460	8	8	26	39	18	22	23	23	Carbamidomethylation; Phosphorylation (STY)	33249	Stanniocalcin-2 OS=Homo sapiens OX=9606 GN=STC2 PE=1 SV=1
530	262	Q9BXX0|EMIL2_HUMAN	174.81	15	2	0	1	13	0	4	98.2		52.7	890		70.2	13	13	1	0	1	19	0	4	Carbamidomethylation; Acetylation (Protein N-term); Phosphorylation (STY)	115687	EMILIN-2 OS=Homo sapiens OX=9606 GN=EMILIN2 PE=1 SV=3
393	282	Q12841|FSTL1_HUMAN	174.78	36	11	11	0	36	18	13	1020	764		3050	1480	227	10	10	7	5	0	22	7	9	Carbamidomethylation; Oxidation (M); Phosphorylation (STY)	34986	Follistatin-related protein 1 OS=Homo sapiens OX=9606 GN=FSTL1 PE=1 SV=1
290	452	Q9NR34|MA1C1_HUMAN	174.12	16	7	7	4	13	4	4	4360	4550	2640	5010	4240	4280	10	10	16	14	8	13	8	13	Carbamidomethylation; Phosphorylation (STY)	70911	Mannosyl-oligosaccharide 1 2-alpha-mannosidase IC OS=Homo sapiens OX=9606 GN=MAN1C1 PE=1 SV=1
382	321	Q86UD1|OAF_HUMAN	173.49	39	3	3	3	39	11	18	0	0	0	3240	40.5	98.5	8	8	3	3	1	14	7	13	Carbamidomethylation; Oxidation (M); Phosphorylation (STY)	30688	Out at first protein homolog OS=Homo sapiens OX=9606 GN=OAF PE=2 SV=1
507	268	Q9H4D0|CSTN2_HUMAN	173.15	20	5	5	8	10	5	5	21.3	0	32.8	398	0	391	12	12	3	2	3	8	4	7	Carbamidomethylation; Oxidation (M); Acetylation (Protein N-term); Phosphorylation (STY)	107006	Calsyntenin-2 OS=Homo sapiens OX=9606 GN=CLSTN2 PE=1 SV=2
410	328	P48058|GRIA4_HUMAN	173.08	14	4	4	1	10	1	9	53.5	46.1	0	2400	0	304	11	11	5	4	1	23	1	8	Carbamidomethylation; Oxidation (M); Phosphorylation (STY)	100871	Glutamate receptor 4 OS=Homo sapiens OX=9606 GN=GRIA4 PE=1 SV=2
271	389	Q86Y38|XYLT1_HUMAN	172.11	9	4	4	4	9	4	4	4070	3310	3180	2740	2560	3670	7	7	15	15	12	18	10	13	Carbamidomethylation; Oxidation (M); Phosphorylation (STY)	107569	Xylosyltransferase 1 OS=Homo sapiens OX=9606 GN=XYLT1 PE=1 SV=1
534	338	P42785|PCP_HUMAN	171.75	26	0	5	0	21	10	6		0		460	381	0	10	10	0	2	0	15	6	3	Carbamidomethylation; Acetylation (Protein N-term); Phosphorylation (STY)	55800	Lysosomal Pro-X carboxypeptidase OS=Homo sapiens OX=9606 GN=PRCP PE=1 SV=1
465	331	Q9HCU4|CELR2_HUMAN	171.4	13	2	2	2	7	4	4	1560	450	454	3990	244	1330	21	21	7	8	7	25	7	12	Carbamidomethylation; Oxidation (M); Acetylation (Protein N-term); Phosphorylation (STY)	317453	Cadherin EGF LAG seven-pass G-type receptor 2 OS=Homo sapiens OX=9606 GN=CELSR2 PE=1 SV=1
377	358	Q9UBW5|BIN2_HUMAN	170.95	25	10	8	7	20	19	22	141	0	246	998	1110	776	7	7	4	6	4	6	9	14	Phosphorylation (STY)	61875	Bridging integrator 2 OS=Homo sapiens OX=9606 GN=BIN2 PE=1 SV=3
237	374	Q5XKE5|K2C79_HUMAN	170.74	21	15	17	16	12	17	18	0	0	0	0	66.2	0	11	3	12	23	18	33	12	14	Carbamidomethylation; Oxidation (M); Acetylation (Protein N-term); Phosphorylation (STY)	57836	Keratin type II cytoskeletal 79 OS=Homo sapiens OX=9606 GN=KRT79 PE=1 SV=2
317	615	P10412|H14_HUMAN	170.48	25	13	7	19	15	19	21	0	107	1390		2960	2190	7	2	3	1	9	8	18	15	Acetylation (Protein N-term); Phosphorylation (STY)	21865	Histone H1.4 OS=Homo sapiens OX=9606 GN=HIST1H1E PE=1 SV=2
679	329	Q02809|PLOD1_HUMAN	170.27	21	0	2	4	12	7	2		0	0	678	113	80.6	9	9	0	1	1	9	4	1	Carbamidomethylation; Phosphorylation (STY)	83550	Procollagen-lysine 2-oxoglutarate 5-dioxygenase 1 OS=Homo sapiens OX=9606 GN=PLOD1 PE=1 SV=2
671	284	Q86VP6|CAND1_HUMAN	170.08	11	0	0	1	9	2	3			30.8	527	33.9	116	9	9	0	0	1	9	2	2	Carbamidomethylation; Phosphorylation (STY)	136375	Cullin-associated NEDD8-dissociated protein 1 OS=Homo sapiens OX=9606 GN=CAND1 PE=1 SV=2
392	326	Q9BQ16|TICN3_HUMAN	169.92	33	8	8	8	20	18	6	204	496	1240	1710	677	297	12	11	4	6	8	17	6	4	Carbamidomethylation; Oxidation (M); Phosphorylation (STY)	49429	Testican-3 OS=Homo sapiens OX=9606 GN=SPOCK3 PE=1 SV=2
325	348	Q02985|FHR3_HUMAN	169.61	35	19	9	11	22	18	14	0	0	0	943	82.7	51.2	10	6	6	8	10	24	12	10	Carbamidomethylation; Oxidation (M); Acetylation (Protein N-term); Phosphorylation (STY)	37323	Complement factor H-related protein 3 OS=Homo sapiens OX=9606 GN=CFHR3 PE=1 SV=2
558	298	Q8IZP7|H6ST3_HUMAN	169.08	29	8	4	0	21	0	10	0	0		794		31.6	10	9	2	4	0	16	0	2	Carbamidomethylation; Acetylation (Protein N-term); Phosphorylation (STY)	54844	Heparan-sulfate 6-O-sulfotransferase 3 OS=Homo sapiens OX=9606 GN=HS6ST3 PE=2 SV=3
260	808	P62805|H4_HUMAN	168.69	40	29	29	40	40	40	40	181	576	785	6500	2910	2720	6	6	11	8	11	24	22	16	Oxidation (M); Acetylation (Protein N-term); Phosphorylation (STY)	11367	Histone H4 OS=Homo sapiens OX=9606 GN=HIST1H4A PE=1 SV=2
622	332	Q9ULP0|NDRG4_HUMAN	168.16	44	15	20	16	38	5	28	0	719	0	720	0	1810	11	11	2	4	2	12	2	5	Carbamidomethylation; Oxidation (M); Acetylation (Protein N-term); Phosphorylation (STY)	38459	Protein NDRG4 OS=Homo sapiens OX=9606 GN=NDRG4 PE=1 SV=2
346	787	Q9UN36|NDRG2_HUMAN	168.13	18	11	11	11	18	10	11	764	752	106	317	461	662	6	6	17	15	7	9	7	13	Carbamidomethylation; Oxidation (M); Acetylation (Protein N-term); Phosphorylation (STY)	40798	Protein NDRG2 OS=Homo sapiens OX=9606 GN=NDRG2 PE=1 SV=2
388	264	P08670|VIME_HUMAN	166.74	34	3	7	3	27	23	18	1050	2050	262	1200	1010	864	14	12	2	4	3	20	10	11	Carbamidomethylation; Oxidation (M); Acetylation (Protein N-term); Phosphorylation (STY)	53652	Vimentin OS=Homo sapiens OX=9606 GN=VIM PE=1 SV=4
301	585	P16402|H13_HUMAN	166.19	23	6	0	19	22	19	19			590	346	1060	719	6	1	2	0	11	14	19	12	Acetylation (Protein N-term); Phosphorylation (STY)	22350	Histone H1.3 OS=Homo sapiens OX=9606 GN=HIST1H1D PE=1 SV=2
550	526	P31949|S10AB_HUMAN	165.96	74	15	15	10	71	46	24	88.3	17.3	518	574	0	37.3	7	7	3	1	1	11	3	5	Carbamidomethylation; Oxidation (M); Acetylation (Protein N-term); Phosphorylation (STY)	11740	Protein S100-A11 OS=Homo sapiens OX=9606 GN=S100A11 PE=1 SV=2
176	517	P04156|PRIO_HUMAN	165.75	21	20	20	20	20	21	20	4850	5410	4590	34900	4380	9130	6	6	17	20	16	52	15	24	Carbamidomethylation; Oxidation (M); Acetylation (Protein N-term); Phosphorylation (STY)	27661	Major prion protein OS=Homo sapiens OX=9606 GN=PRNP PE=1 SV=1
822	315	Q9BQT9|CSTN3_HUMAN	165.7	14	1	5	1	11	1	1	0	0	352	1380	0	63.1	11	11	1	2	1	12	2	1	Carbamidomethylation; Phosphorylation (STY)	106098	Calsyntenin-3 OS=Homo sapiens OX=9606 GN=CLSTN3 PE=1 SV=1
443	286	Q08431|MFGM_HUMAN	165.06	28	8	4	8	28	8	8	0	404	469	1280	0	124	10	10	4	3	4	17	3	3	Carbamidomethylation; Phosphorylation (STY)	43105	Lactadherin OS=Homo sapiens OX=9606 GN=MFGE8 PE=1 SV=3
529	550	Q9NQX5|NPDC1_HUMAN	164.82	43	4	16	0	16	12	20	0	57.3		1480	91.9	74.9	8	8	1	2	0	13	2	6	Carbamidomethylation; Acetylation (Protein N-term); Phosphorylation (STY)	34516	Neural proliferation differentiation and control protein 1 OS=Homo sapiens OX=9606 GN=NPDC1 PE=1 SV=2
236	667	P01210|PENK_HUMAN	164.41	45	22	12	30	18	31	18	6310	1560	1250	681	3020	1600	9	9	39	12	10	10	26	16	Phosphorylation (STY)	30787	Proenkephalin-A OS=Homo sapiens OX=9606 GN=PENK PE=1 SV=1
182	819	P02656|APOC3_HUMAN	164.14	49	46	27	30	46	27	46	2770	3340	14800	25700	6610	11600	4	4	12	11	34	35	20	25	Phosphorylation (STY)	10852	Apolipoprotein C-III OS=Homo sapiens OX=9606 GN=APOC3 PE=1 SV=1
582	466	P30447|1A23_HUMAN	164.03	27	7	7	24	12	13	13			56.1				7	2	2	1	10	3	3	3	Carbamidomethylation; Acetylation (Protein N-term); Phosphorylation (STY)	40733	HLA class I histocompatibility antigen A-23 alpha chain OS=Homo sapiens OX=9606 GN=HLA-A PE=1 SV=1
582	467	P05534|1A24_HUMAN	164.03	27	7	7	24	12	13	13			56.1				7	2	2	1	10	3	3	3	Carbamidomethylation; Acetylation (Protein N-term); Phosphorylation (STY)	40689	HLA class I histocompatibility antigen A-24 alpha chain OS=Homo sapiens OX=9606 GN=HLA-A PE=1 SV=2
274	412	P51858|HDGF_HUMAN	163.5	57	25	11	23	44	15	35	1540	875	2020	3320	4870	6160	14	14	11	6	17	20	21	30	Carbamidomethylation; Acetylation (Protein N-term); Phosphorylation (STY)	26788	Hepatoma-derived growth factor OS=Homo sapiens OX=9606 GN=HDGF PE=1 SV=1
225	479	Q9UGM5|FETUB_HUMAN	163.33	22	10	10	18	22	12	10	7470	5630	4500	4130	5220	4130	7	7	22	17	24	17	18	18	Carbamidomethylation; Phosphorylation (STY)	42055	Fetuin-B OS=Homo sapiens OX=9606 GN=FETUB PE=1 SV=2
561	386	Q08554|DSC1_HUMAN	163.27	9	4	2	2	6	1	1	110	82.9	421	291	194	118	7	7	4	4	3	5	1	3	Carbamidomethylation; Acetylation (Protein N-term); Phosphorylation (STY)	99987	Desmocollin-1 OS=Homo sapiens OX=9606 GN=DSC1 PE=1 SV=2
231	528	P50502|F10A1_HUMAN	163.15	25	6	4	6	17	6	25	1320	1040	1570	3260	1810	12400	8	8	16	10	17	15	21	46	Phosphorylation (STY)	41332	Hsc70-interacting protein OS=Homo sapiens OX=9606 GN=ST13 PE=1 SV=2
156	653	A0M8Q6|IGLC7_HUMAN	163.09	51	32	32	32	51	32	32				1810			4	2	27	31	24	41	28	29	Phosphorylation (STY)	11254	Immunoglobulin lambda constant 7 OS=Homo sapiens OX=9606 GN=IGLC7 PE=1 SV=3
471	665	Q96CX2|KCD12_HUMAN	162.04	30	21	18	18	24	18	18	57.3	102	230	813	354	18.4	7	7	4	5	5	9	4	9	Phosphorylation (STY)	35701	BTB/POZ domain-containing protein KCTD12 OS=Homo sapiens OX=9606 GN=KCTD12 PE=1 SV=1
403	465	P09104|ENOG_HUMAN	162.04	23	5	5	0	17	11	5				168			7	3	4	2	0	11	16	3	Carbamidomethylation; Acetylation (Protein N-term); Phosphorylation (STY)	47269	Gamma-enolase OS=Homo sapiens OX=9606 GN=ENO2 PE=1 SV=3
526	464	P14780|MMP9_HUMAN	161.67	18	8	0	0	16	16	5	156			442	155	0	7	7	3	0	0	9	10	5	Carbamidomethylation; Oxidation (M); Phosphorylation (STY)	78458	Matrix metalloproteinase-9 OS=Homo sapiens OX=9606 GN=MMP9 PE=1 SV=3
384	387	Q9UP79|ATS8_HUMAN	161.55	15	2	5	5	11	2	2	1930	1310	1530	1330	3130	1420	7	7	7	6	5	11	5	6	Carbamidomethylation; Oxidation (M); Phosphorylation (STY)	96460	A disintegrin and metalloproteinase with thrombospondin motifs 8 OS=Homo sapiens OX=9606 GN=ADAMTS8 PE=2 SV=2
209	475	P02745|C1QA_HUMAN	161.1	38	22	18	24	33	24	23	2730	2770	18000	26500	5990	10400	9	9	7	9	35	51	23	21	Carbamidomethylation; Oxidation (M); Acetylation (Protein N-term); Phosphorylation (STY)	26017	Complement C1q subcomponent subunit A OS=Homo sapiens OX=9606 GN=C1QA PE=1 SV=2
533	378	Q9BZR6|RTN4R_HUMAN	161.03	23	0	2	5	23	0	10		41.5	43.7	1380		2040	8	8	0	3	1	15	0	5	Carbamidomethylation; Phosphorylation (STY)	50708	Reticulon-4 receptor OS=Homo sapiens OX=9606 GN=RTN4R PE=1 SV=1
449	385	P58400|NRX1B_HUMAN	160.87	33	11	13	7	17	6	9		1530					8	1	2	5	6	10	2	5	Carbamidomethylation; Phosphorylation (STY)	50424	Neurexin-1-beta OS=Homo sapiens OX=9606 GN=NRXN1 PE=1 SV=3
329	281	P19012|K1C15_HUMAN	160.39	27	5	19	11	16	7	13		0					12	1	5	8	8	24	7	10	Phosphorylation (STY)	49212	Keratin type I cytoskeletal 15 OS=Homo sapiens OX=9606 GN=KRT15 PE=1 SV=3
789	388	P18669|PGAM1_HUMAN	160.29	54	0	0	0	54	7	4				531	39.4		9	7	0	0	0	14	1	1	Carbamidomethylation; Oxidation (M); Acetylation (Protein N-term); Phosphorylation (STY)	28804	Phosphoglycerate mutase 1 OS=Homo sapiens OX=9606 GN=PGAM1 PE=1 SV=2
646	391	P35052|GPC1_HUMAN	159.47	21	3	4	12	15	0	3	23	0	9.02	1370		11	9	9	1	2	4	14	0	1	Carbamidomethylation; Acetylation (Protein N-term); Phosphorylation (STY)	61680	Glypican-1 OS=Homo sapiens OX=9606 GN=GPC1 PE=1 SV=2
616	409	P12814|ACTN1_HUMAN	158.98	14	1	7	2	11	5	1		0	39.5	76	63.4		9	4	1	5	1	6	6	1	Carbamidomethylation; Phosphorylation (STY)	103058	Alpha-actinin-1 OS=Homo sapiens OX=9606 GN=ACTN1 PE=1 SV=2
585	308	Q9NZK5|ADA2_HUMAN	158.85	21	0	0	0	19	8	5				3440	672	50.1	11	11	0	0	0	16	5	2	Carbamidomethylation; Phosphorylation (STY)	58934	Adenosine deaminase 2 OS=Homo sapiens OX=9606 GN=ADA2 PE=1 SV=2
638	292	Q07954|LRP1_HUMAN	158.11	9	2	3	1	3	2	2	335	100	4990	479	42.2	112	20	20	5	6	2	10	6	5	Carbamidomethylation; Oxidation (M); Acetylation (Protein N-term); Phosphorylation (STY)	504610	Prolow-density lipoprotein receptor-related protein 1 OS=Homo sapiens OX=9606 GN=LRP1 PE=1 SV=2
446	344	Q6UXH9|PAMR1_HUMAN	157.68	16	3	1	3	14	1	1	909	402	802	644	704	1010	11	11	9	7	9	16	5	7	Carbamidomethylation; Oxidation (M); Phosphorylation (STY)	80199	Inactive serine protease PAMR1 OS=Homo sapiens OX=9606 GN=PAMR1 PE=1 SV=1
155	557	O95633|FSTL3_HUMAN	157.66	42	18	10	10	33	10	10	9420	5920	4720	9070	6850	12600	6	6	38	31	19	40	31	40	Carbamidomethylation; Phosphorylation (STY)	27663	Follistatin-related protein 3 OS=Homo sapiens OX=9606 GN=FSTL3 PE=1 SV=1
871	410	P07093|GDN_HUMAN	157.49	22	0	0	0	20	2	2				541	0	0	8	8	0	0	0	7	1	1	Carbamidomethylation; Acetylation (Protein N-term); Phosphorylation (STY)	44002	Glia-derived nexin OS=Homo sapiens OX=9606 GN=SERPINE2 PE=1 SV=1
942	462	P15502|ELN_HUMAN	157.48	25	0	0	0	22	2	1				981	0	0	8	8	0	0	0	7	1	1	Acetylation (Protein N-term); Phosphorylation (STY)	68397	Elastin OS=Homo sapiens OX=9606 GN=ELN PE=1 SV=4
515	356	P34931|HS71L_HUMAN	157.44	23	2	2	2	14	13	10					44.1	152	11	4	1	1	1	10	8	7	Oxidation (M); Phosphorylation (STY)	70375	Heat shock 70 kDa protein 1-like OS=Homo sapiens OX=9606 GN=HSPA1L PE=1 SV=2
584	327	Q6ZRP7|QSOX2_HUMAN	157.33	20	5	5	6	17	4	4	725	582	1030	942	182	279	11	11	4	4	3	14	1	1	Carbamidomethylation; Phosphorylation (STY)	77529	Sulfhydryl oxidase 2 OS=Homo sapiens OX=9606 GN=QSOX2 PE=1 SV=3
516	450	P27348|1433T_HUMAN	157.19	40	4	4	12	40	17	14			0	607	173	70.9	8	7	1	3	2	10	7	5	Carbamidomethylation; Oxidation (M); Phosphorylation (STY)	27764	14-3-3 protein theta OS=Homo sapiens OX=9606 GN=YWHAQ PE=1 SV=1
367	407	Q5JSH3|WDR44_HUMAN	157.15	17	7	6	9	8	11	15	724	278	1310	4320	684	2590	11	11	7	7	8	7	8	16	Oxidation (M); Acetylation (Protein N-term); Phosphorylation (STY)	101366	WD repeat-containing protein 44 OS=Homo sapiens OX=9606 GN=WDR44 PE=1 SV=1
332	364	Q02818|NUCB1_HUMAN	156.83	26	9	6	10	20	12	10	4710	2810	1550	4280	5570	3950	9	9	9	7	4	16	12	15	Oxidation (M); Phosphorylation (STY)	53879	Nucleobindin-1 OS=Homo sapiens OX=9606 GN=NUCB1 PE=1 SV=4
639	421	Q9HC84|MUC5B_HUMAN	156.53	6	1	0	1	3	2	1	0	282	530	5720	241	51	14	14	2	1	2	9	8	2	Carbamidomethylation; Acetylation (Protein N-term); Phosphorylation (STY)	596344	Mucin-5B OS=Homo sapiens OX=9606 GN=MUC5B PE=1 SV=3
614	470	P35580|MYH10_HUMAN	156.17	11	1	2	4	6	5	2		0	3670	121	47.1	3300	17	9	2	5	7	12	9	5	Carbamidomethylation; Oxidation (M); Acetylation (Protein N-term); Phosphorylation (STY)	228997	Myosin-10 OS=Homo sapiens OX=9606 GN=MYH10 PE=1 SV=3
198	354	P16949|STMN1_HUMAN	156.17	57	20	42	45	49	30	46	5320	11100	6540	9170	5850	14500	11	11	20	24	23	28	23	30	Phosphorylation (STY)	17302	Stathmin OS=Homo sapiens OX=9606 GN=STMN1 PE=1 SV=3
591	540	Q00610|CLH1_HUMAN	155.98	5	1	2	1	4	3	3	13.5	18.3	0	115	56.5	195	6	6	1	2	1	7	4	3	Oxidation (M); Phosphorylation (STY)	191613	Clathrin heavy chain 1 OS=Homo sapiens OX=9606 GN=CLTC PE=1 SV=5
281	498	Q9H173|SIL1_HUMAN	155.78	15	7	7	10	13	7	9	5050	3710	1830	3770	2450	4670	8	8	13	15	11	23	18	16	Oxidation (M); Acetylation (Protein N-term); Phosphorylation (STY)	52085	Nucleotide exchange factor SIL1 OS=Homo sapiens OX=9606 GN=SIL1 PE=1 SV=1
461	361	Q92765|SFRP3_HUMAN	155.4	30	15	11	11	30	15	21	33.8	39.1	44.2	3020	0	19.8	9	9	6	3	3	16	5	5	Carbamidomethylation; Phosphorylation (STY)	36254	Secreted frizzled-related protein 3 OS=Homo sapiens OX=9606 GN=FRZB PE=1 SV=2
495	379	Q86Y46|K2C73_HUMAN	155.26	22	4	8	6	17	2	6	0	997	69	2530		0	10	4	2	3	6	12	4	4	Carbamidomethylation; Acetylation (Protein N-term); Phosphorylation (STY)	58923	Keratin type II cytoskeletal 73 OS=Homo sapiens OX=9606 GN=KRT73 PE=1 SV=1
594	483	P37802|TAGL2_HUMAN	155.17	37	6	6	16	37	6	16	62.8	61.3	205	426	85.2	255	5	5	1	3	4	5	2	5	Carbamidomethylation; Phosphorylation (STY)	22391	Transgelin-2 OS=Homo sapiens OX=9606 GN=TAGLN2 PE=1 SV=3
364	324	O43173|SIA8C_HUMAN	154.46	22	7	4	2	22	4	4	792	481	256	708	418	526	8	8	9	5	2	21	6	7	Carbamidomethylation; Phosphorylation (STY)	43970	Sia-alpha-2 3-Gal-beta-1 4-GlcNAc-R:alpha 2 8-sialyltransferase OS=Homo sapiens OX=9606 GN=ST8SIA3 PE=1 SV=3
396	820	P19105|ML12A_HUMAN	154.07	32	16	16	11	32	32	32	294	420	379	922	1010	1450	5	5	3	6	3	10	10	8	Oxidation (M); Phosphorylation (STY)	19794	Myosin regulatory light chain 12A OS=Homo sapiens OX=9606 GN=MYL12A PE=1 SV=2
396	837	O14950|ML12B_HUMAN	154.07	31	16	16	10	31	31	31	294	420	379	922	1010	1450	5	5	3	6	3	10	10	8	Oxidation (M); Phosphorylation (STY)	19779	Myosin regulatory light chain 12B OS=Homo sapiens OX=9606 GN=MYL12B PE=1 SV=2
722	400	Q08188|TGM3_HUMAN	154.07	22	0	3	0	21	8	9		0		1360	102	122	10	10	0	1	0	9	4	3	Carbamidomethylation; Phosphorylation (STY)	76632	Protein-glutamine gamma-glutamyltransferase E OS=Homo sapiens OX=9606 GN=TGM3 PE=1 SV=4
757	393	P14543|NID1_HUMAN	153.91	14	0	4	0	8	2	0		0		792	0		9	9	0	1	0	10	1	0	Carbamidomethylation; Oxidation (M); Phosphorylation (STY)	136377	Nidogen-1 OS=Homo sapiens OX=9606 GN=NID1 PE=1 SV=3
525	260	Q9UHC6|CNTP2_HUMAN	153.36	15	4	2	0	12	3	3	36	20		1170	0	190	12	12	2	3	0	19	1	4	Carbamidomethylation; Phosphorylation (STY)	148167	Contactin-associated protein-like 2 OS=Homo sapiens OX=9606 GN=CNTNAP2 PE=1 SV=1
514	310	Q13214|SEM3B_HUMAN	152.97	17	4	2	2	15	2	7	60.7	22.8	0	566	107	119	10	10	3	2	1	14	1	5	Carbamidomethylation; Acetylation (Protein N-term); Phosphorylation (STY)	83122	Semaphorin-3B OS=Homo sapiens OX=9606 GN=SEMA3B PE=2 SV=1
821	418	Q12797|ASPH_HUMAN	152.55	15	3	3	2	10	1	2	57.5	0	243	538	0	47.7	8	8	2	1	1	7	2	1	Carbamidomethylation; Phosphorylation (STY)	85863	Aspartyl/asparaginyl beta-hydroxylase OS=Homo sapiens OX=9606 GN=ASPH PE=1 SV=3
424	520	A0A0B4J1V0|HV315_HUMAN	151.64	46	26	26	18	37	26	39	31	108	112	961	72.7	124	7	4	6	5	5	14	6	6	Carbamidomethylation; Phosphorylation (STY)	12926	Immunoglobulin heavy variable 3-15 OS=Homo sapiens OX=9606 GN=IGHV3-15 PE=3 SV=1
861	402	P07195|LDHB_HUMAN	151.44	39	0	3	12	30	0	3		0	0	550		0	9	8	0	1	2	9	0	1	Carbamidomethylation; Oxidation (M); Acetylation (Protein N-term); Phosphorylation (STY)	36639	L-lactate dehydrogenase B chain OS=Homo sapiens OX=9606 GN=LDHB PE=1 SV=2
365	382	P17600|SYN1_HUMAN	151.39	21	10	14	7	12	6	10	1390	963	670	673	705	1560	9	9	8	10	6	9	5	8	Acetylation (Protein N-term); Phosphorylation (STY)	74111	Synapsin-1 OS=Homo sapiens OX=9606 GN=SYN1 PE=1 SV=3
512	680	Q9UPU3|SORC3_HUMAN	151.31	8	3	1	3	4	1	3	1860	97.3	487	2340	55.5	179	8	8	2	2	2	15	2	4	Carbamidomethylation; Oxidation (M); Acetylation (Protein N-term); Phosphorylation (STY)	135755	VPS10 domain-containing receptor SorCS3 OS=Homo sapiens OX=9606 GN=SORCS3 PE=2 SV=2
719	316	Q99715|COCA1_HUMAN	151.23	5	0	0	1	4	1	1			16.9	454	21.2	120	12	12	0	0	1	10	1	3	Acetylation (Protein N-term); Phosphorylation (STY)	333147	Collagen alpha-1(XII) chain OS=Homo sapiens OX=9606 GN=COL12A1 PE=1 SV=2
583	333	P08697|A2AP_HUMAN	151.2	22	5	3	14	20	6	5	218	33.5	124	3810	149	1840	10	10	5	3	6	11	5	5	Carbamidomethylation; Acetylation (Protein N-term); Phosphorylation (STY)	54566	Alpha-2-antiplasmin OS=Homo sapiens OX=9606 GN=SERPINF2 PE=1 SV=3
369	347	Q02952|AKA12_HUMAN	150.88	8	5	4	4	5	6	8	401	801	937	1040	1010	2550	9	9	6	9	6	8	9	18	Carbamidomethylation; Phosphorylation (STY)	191480	A-kinase anchor protein 12 OS=Homo sapiens OX=9606 GN=AKAP12 PE=1 SV=4
596	512	Q6JBY9|CPZIP_HUMAN	150.85	27	0	12	17	7	24	18		53.1	179	463	742	304	8	8	0	2	6	3	11	6	Carbamidomethylation; Phosphorylation (STY)	44504	CapZ-interacting protein OS=Homo sapiens OX=9606 GN=RCSD1 PE=1 SV=1
136	469	Q9BUN1|MENT_HUMAN	150.79	30	9	9	22	18	17	9	14000	9510	30800	11500	15200	15700	8	8	40	38	55	43	42	42	Carbamidomethylation; Oxidation (M); Phosphorylation (STY)	36769	Protein MENT OS=Homo sapiens OX=9606 GN=MENT PE=2 SV=1
275	611	P16403|H12_HUMAN	150.62	23	14	8	19	23	19	19	230	194	2370	2450	6520	3430	5	1	5	4	11	22	13	12	Acetylation (Protein N-term); Phosphorylation (STY)	21365	Histone H1.2 OS=Homo sapiens OX=9606 GN=HIST1H1C PE=1 SV=2
395	777	P31946|1433B_HUMAN	150.25	19	11	11	11	19	19	19	510	566	314	1630	1780	847	3	2	3	7	3	10	10	6	Carbamidomethylation; Oxidation (M); Phosphorylation (STY)	28082	14-3-3 protein beta/alpha OS=Homo sapiens OX=9606 GN=YWHAB PE=1 SV=3
339	556	O15354|GPR37_HUMAN	149.86	16	5	5	7	14	5	7	3540	2390	8110	12100	4990	6740	7	7	11	9	13	18	12	8	Carbamidomethylation; Phosphorylation (STY)	67114	Prosaposin receptor GPR37 OS=Homo sapiens OX=9606 GN=GPR37 PE=1 SV=2
625	343	Q8IXL6|FA20C_HUMAN	149.51	28	8	4	7	18	4	5	180	47	89.7	729	0	193	10	10	6	1	2	10	2	3	Carbamidomethylation; Oxidation (M); Acetylation (Protein N-term); Phosphorylation (STY)	66235	Extracellular serine/threonine protein kinase FAM20C OS=Homo sapiens OX=9606 GN=FAM20C PE=1 SV=2
782	370	O00339|MATN2_HUMAN	148.55	12	0	2	2	10	0	0		342	102	917			8	8	0	1	1	11	0	0	Carbamidomethylation; Acetylation (Protein N-term); Phosphorylation (STY)	106837	Matrilin-2 OS=Homo sapiens OX=9606 GN=MATN2 PE=1 SV=4
299	404	Q6UWH4|GAK1B_HUMAN	148.45	18	3	5	3	18	3	5	7200	2620	9980	8430	8130	14300	9	9	8	8	12	18	13	13	Phosphorylation (STY)	57552	Golgi-associated kinase 1B OS=Homo sapiens OX=9606 GN=GASK1B PE=2 SV=1
710	655	O75995|SASH3_HUMAN	148.31	27	18	0	8	6	10	21	0		0	104	405	897	4	4	3	0	1	3	6	5	Phosphorylation (STY)	41596	SAM and SH3 domain-containing protein 3 OS=Homo sapiens OX=9606 GN=SASH3 PE=1 SV=2
513	352	Q13428|TCOF_HUMAN	148.02	14	2	1	2	7	3	7	54.3	82.4	0	313	295	723	14	14	2	1	1	9	8	11	Acetylation (Protein N-term); Phosphorylation (STY)	152105	Treacle protein OS=Homo sapiens OX=9606 GN=TCOF1 PE=1 SV=3
750	330	Q9NS15|LTBP3_HUMAN	147.96	13	0	4	0	8	0	1		2770		583		122	10	9	0	2	0	10	0	1	Carbamidomethylation; Acetylation (Protein N-term); Phosphorylation (STY)	139359	Latent-transforming growth factor beta-binding protein 3 OS=Homo sapiens OX=9606 GN=LTBP3 PE=1 SV=4
357	499	P33241|LSP1_HUMAN	147.43	44	14	15	28	11	34	21	877	489	1220	2540	4950	1320	9	9	5	9	11	4	22	10	Carbamidomethylation; Oxidation (M); Phosphorylation (STY)	37192	Lymphocyte-specific protein 1 OS=Homo sapiens OX=9606 GN=LSP1 PE=1 SV=1
435	413	P58401|NRX2B_HUMAN	147.4	12	5	5	3	12	5	8	7780	3780	15400	13200	7050	5700	7	1	10	8	14	20	10	12	Carbamidomethylation; Oxidation (M); Phosphorylation (STY)	70927	Neurexin-2-beta OS=Homo sapiens OX=9606 GN=NRXN2 PE=1 SV=1
476	834	Q92882|OSTF1_HUMAN	146.67	25	7	7	10	21	21	16	545	306	876	717	945	697	4	4	2	1	6	8	6	5	Phosphorylation (STY)	23787	Osteoclast-stimulating factor 1 OS=Homo sapiens OX=9606 GN=OSTF1 PE=1 SV=2
351	688	Q9Y281|COF2_HUMAN	146.39	49	14	37	14	36	24	24	1290	1430	710	493	947	746	6	3	6	7	4	13	10	7	Acetylation (Protein N-term); Phosphorylation (STY)	18737	Cofilin-2 OS=Homo sapiens OX=9606 GN=CFL2 PE=1 SV=1
421	489	Q02413|DSG1_HUMAN	146.04	12	5	3	5	7	5	5	65.3	166	481	3280	145	144	6	6	6	4	8	17	5	6	Carbamidomethylation; Oxidation (M); Acetylation (Protein N-term); Phosphorylation (STY)	113748	Desmoglein-1 OS=Homo sapiens OX=9606 GN=DSG1 PE=1 SV=2
606	634	P05408|7B2_HUMAN	145.78	29	15	15	15	23	9	9	231	218	246	198	0	301	4	4	2	3	4	8	1	1	Carbamidomethylation; Phosphorylation (STY)	23730	Neuroendocrine protein 7B2 OS=Homo sapiens OX=9606 GN=SCG5 PE=1 SV=2
335	1023	P29692|EF1D_HUMAN	145.2	18	14	9	14	14	14	18	579	211	1350	1170	2930	3180	3	3	5	2	8	6	23	16	Oxidation (M); Acetylation (Protein N-term); Phosphorylation (STY)	31122	Elongation factor 1-delta OS=Homo sapiens OX=9606 GN=EEF1D PE=1 SV=5
580	707	A8K2U0|A2ML1_HUMAN	144.49	10	2	4	3	6	3	2	53.7	102	138	630	270	209	7	7	4	2	2	7	4	2	Carbamidomethylation; Phosphorylation (STY)	161106	Alpha-2-macroglobulin-like protein 1 OS=Homo sapiens OX=9606 GN=A2ML1 PE=1 SV=3
506	446	O95390|GDF11_HUMAN	144.38	27	13	14	3	19	7	13	3790	2390	135	661	225	2040	9	8	4	6	4	15	2	7	Carbamidomethylation; Oxidation (M); Acetylation (Protein N-term); Phosphorylation (STY)	45091	Growth/differentiation factor 11 OS=Homo sapiens OX=9606 GN=GDF11 PE=1 SV=1
911	420	Q8IWV2|CNTN4_HUMAN	144.27	13	0	1	0	13	0	3		53.8		2110		52.1	7	7	0	1	0	7	0	1	Carbamidomethylation; Acetylation (Protein N-term); Phosphorylation (STY)	113454	Contactin-4 OS=Homo sapiens OX=9606 GN=CNTN4 PE=1 SV=1
615	510	Q96B97|SH3K1_HUMAN	143.96	14	3	10	6	1	8	10	17.8	118	207	0	1560	735	7	7	4	4	2	1	9	6	Carbamidomethylation; Phosphorylation (STY)	73126	SH3 domain-containing kinase-binding protein 1 OS=Homo sapiens OX=9606 GN=SH3KBP1 PE=1 SV=2
441	559	P13746|1A11_HUMAN	143.35	21	7	7	9	21	13	16	29.5	0		325	122	399	5	1	1	1	3	10	6	13	Carbamidomethylation; Acetylation (Protein N-term); Phosphorylation (STY)	40937	HLA class I histocompatibility antigen A-11 alpha chain OS=Homo sapiens OX=9606 GN=HLA-A PE=1 SV=1
441	560	P04439|1A03_HUMAN	143.35	21	7	7	9	21	13	16	29.5	0		325	122	399	5	1	1	1	3	10	6	13	Carbamidomethylation; Acetylation (Protein N-term); Phosphorylation (STY)	40841	HLA class I histocompatibility antigen A-3 alpha chain OS=Homo sapiens OX=9606 GN=HLA-A PE=1 SV=2
441	561	P16188|1A30_HUMAN	143.35	21	7	7	9	21	13	16	29.5	0		325	122	399	5	1	1	1	3	10	6	13	Carbamidomethylation; Acetylation (Protein N-term); Phosphorylation (STY)	40905	HLA class I histocompatibility antigen A-30 alpha chain OS=Homo sapiens OX=9606 GN=HLA-A PE=1 SV=2
422	627	P07737|PROF1_HUMAN	142.48	49	38	49	11	29	48	49	331	484	44.5	569	720	296	5	5	5	8	2	6	12	5	Carbamidomethylation; Oxidation (M); Acetylation (Protein N-term); Phosphorylation (STY)	15054	Profilin-1 OS=Homo sapiens OX=9606 GN=PFN1 PE=1 SV=2
477	415	Q15149|PLEC_HUMAN	142.47	13	4	3	3	4	2	6	21600	1430	8620	17200	1440	3280	46	46	17	12	11	19	13	21	Carbamidomethylation; Oxidation (M); Acetylation (Protein N-term); Phosphorylation (STY)	531796	Plectin OS=Homo sapiens OX=9606 GN=PLEC PE=1 SV=3
445	449	Q7Z6Z7|HUWE1_HUMAN	142.08	7	1	1	1	2	0	4	220	502	228	400	314	4180	16	16	2	6	5	9	5	16	Carbamidomethylation; Oxidation (M); Acetylation (Protein N-term); Phosphorylation (STY)	481896	E3 ubiquitin-protein ligase HUWE1 OS=Homo sapiens OX=9606 GN=HUWE1 PE=1 SV=3
578	381	Q05707|COEA1_HUMAN	141.88	16	2	0	2	9	7	4	331		26.7	6350	42.2	56.9	16	16	2	0	2	14	5	6	Acetylation (Protein N-term); Phosphorylation (STY)	193513	Collagen alpha-1(XIV) chain OS=Homo sapiens OX=9606 GN=COL14A1 PE=1 SV=3
595	721	Q09160|1A80_HUMAN	140.87	19	7	7	13	12	13	16							5	0	2	1	7	4	3	4	Carbamidomethylation; Acetylation (Protein N-term); Phosphorylation (STY)	40792	HLA class I histocompatibility antigen A-80 alpha chain OS=Homo sapiens OX=9606 GN=HLA-A PE=1 SV=1
631	485	Q8NBI6|XXLT1_HUMAN	140.44	22	3	3	5	15	3	8	116	116	93.2	316	82.6	109	7	7	1	2	4	8	1	2	Carbamidomethylation; Phosphorylation (STY)	43807	Xyloside xylosyltransferase 1 OS=Homo sapiens OX=9606 GN=XXYLT1 PE=1 SV=1
287	579	Q07092|COGA1_HUMAN	139.62	13	5	1	5	8	2	3	13400	4210	4040	4830	11300	6440	12	12	19	11	11	18	10	11	Carbamidomethylation; Oxidation (M); Acetylation (Protein N-term); Phosphorylation (STY)	157751	Collagen alpha-1(XVI) chain OS=Homo sapiens OX=9606 GN=COL16A1 PE=1 SV=2
649	432	P40121|CAPG_HUMAN	139.04	23	10	7	10	23	3	3	358	103	312	1730	222	457	6	6	2	3	2	10	1	2	Acetylation (Protein N-term); Phosphorylation (STY)	38499	Macrophage-capping protein OS=Homo sapiens OX=9606 GN=CAPG PE=1 SV=2
448	422	A0A0A0MS15|HV349_HUMAN	138.87	62	36	29	26	46	9	9	3030	122	0	534			8	5	5	8	4	12	3	4	Carbamidomethylation; Acetylation (Protein N-term); Phosphorylation (STY)	13056	Immunoglobulin heavy variable 3-49 OS=Homo sapiens OX=9606 GN=IGHV3-49 PE=3 SV=1
576	554	Q9UPU5|UBP24_HUMAN	138.45	8	4	2	0	3	2	3	43.1	22.6	136	270	387	3230	12	12	6	5	2	5	5	5	Carbamidomethylation; Oxidation (M); Phosphorylation (STY)	294364	Ubiquitin carboxyl-terminal hydrolase 24 OS=Homo sapiens OX=9606 GN=USP24 PE=1 SV=3
517	639	P61981|1433G_HUMAN	137.96	32	4	12	12	19	12	24		0	0	186	43.5	106	4	3	1	4	2	6	7	4	Carbamidomethylation; Oxidation (M); Phosphorylation (STY)	28303	14-3-3 protein gamma OS=Homo sapiens OX=9606 GN=YWHAG PE=1 SV=2
455	383	Q01082|SPTB2_HUMAN	137.95	9	3	3	4	4	4	4	1240	529	1060	916	2430	3070	15	15	11	12	13	13	14	11	Oxidation (M); Acetylation (Protein N-term); Phosphorylation (STY)	274608	Spectrin beta chain non-erythrocytic 1 OS=Homo sapiens OX=9606 GN=SPTBN1 PE=1 SV=2
431	411	Q9NYF8|BCLF1_HUMAN	137.79	16	1	1	5	8	5	10	67.6	55.3	814	1740	740	1990	14	14	2	2	9	8	9	14	Acetylation (Protein N-term); Phosphorylation (STY)	106122	Bcl-2-associated transcription factor 1 OS=Homo sapiens OX=9606 GN=BCLAF1 PE=1 SV=2
570	624	P22392|NDKB_HUMAN	137.77	39	11	17	0	39	34	11				146	149		4	2	1	4	0	5	7	7	Carbamidomethylation; Phosphorylation (STY)	17298	Nucleoside diphosphate kinase B OS=Homo sapiens OX=9606 GN=NME2 PE=1 SV=1
292	675	Q9UK55|ZPI_HUMAN	137.66	11	6	6	8	11	6	6	5900	4900	15200	3910	2920	2460	5	5	16	17	34	10	9	11	Phosphorylation (STY)	50707	Protein Z-dependent protease inhibitor OS=Homo sapiens OX=9606 GN=SERPINA10 PE=1 SV=1
553	622	Q8TAG5|VTM2A_HUMAN	137.64	33	4	9	3	26	0	17	0	49.8	0	2700		290	6	6	2	6	1	8	0	5	Carbamidomethylation; Acetylation (Protein N-term); Phosphorylation (STY)	25833	V-set and transmembrane domain-containing protein 2A OS=Homo sapiens OX=9606 GN=VSTM2A PE=1 SV=3
432	455	Q16363|LAMA4_HUMAN	137.59	7	2	2	2	7	3	2	1120	412	344	1040	1480	1790	8	8	4	5	5	8	8	9	Phosphorylation (STY)	202523	Laminin subunit alpha-4 OS=Homo sapiens OX=9606 GN=LAMA4 PE=1 SV=4
302	1128	Q13442|HAP28_HUMAN	137.32	25	18	24	10	9	10	10	1210	1710	1720	2040	1980	2650	4	4	8	13	10	10	12	10	Oxidation (M); Phosphorylation (STY)	20630	28 kDa heat- and acid-stable phosphoprotein OS=Homo sapiens OX=9606 GN=PDAP1 PE=1 SV=1
685	536	Q9BYJ0|FGFP2_HUMAN	137.12	35	8	8	8	35	8	8	117	90.9	0	569	212	0	5	5	1	3	2	8	2	4	Carbamidomethylation; Phosphorylation (STY)	24581	Fibroblast growth factor-binding protein 2 OS=Homo sapiens OX=9606 GN=FGFBP2 PE=1 SV=1
729	714	P00740|FA9_HUMAN	136.84	20	4	4	4	12	4	12	175	115	92	651	0	312	6	6	1	3	1	5	1	3	Carbamidomethylation; Phosphorylation (STY)	51778	Coagulation factor IX OS=Homo sapiens OX=9606 GN=F9 PE=1 SV=2
926	599	Q9NY97|B3GN2_HUMAN	136.44	21	0	0	3	18	0	0			0	500			6	6	0	0	1	6	0	0	Phosphorylation (STY)	46022	N-acetyllactosaminide beta-1 3-N-acetylglucosaminyltransferase 2 OS=Homo sapiens OX=9606 GN=B3GNT2 PE=1 SV=2
748	453	Q6ZMP0|THSD4_HUMAN	136.28	15	0	2	2	8	0	13		0	0	507		518	9	9	0	1	1	6	0	8	Carbamidomethylation; Oxidation (M); Phosphorylation (STY)	112450	Thrombospondin type-1 domain-containing protein 4 OS=Homo sapiens OX=9606 GN=THSD4 PE=2 SV=2
363	1004	Q9HBR0|S38AA_HUMAN	135.37	5	2	2	2	4	2	3	581	0	0	492	533	764	6	6	15	4	3	7	11	15	Carbamidomethylation; Acetylation (Protein N-term); Phosphorylation (STY)	119762	Putative sodium-coupled neutral amino acid transporter 10 OS=Homo sapiens OX=9606 GN=SLC38A10 PE=1 SV=2
488	541	P16401|H15_HUMAN	135.35	32	5	0	12	25	14	9	132		1330	15300	2350	2080	8	7	1	0	4	10	9	7	Acetylation (Protein N-term); Phosphorylation (STY)	22580	Histone H1.5 OS=Homo sapiens OX=9606 GN=HIST1H1B PE=1 SV=3
642	473	P06748|NPM_HUMAN	135.29	40	3	0	11	18	19	21	0		148	1140	1490	1480	6	6	1	0	3	5	7	7	Carbamidomethylation; Oxidation (M); Acetylation (Protein N-term); Phosphorylation (STY)	32575	Nucleophosmin OS=Homo sapiens OX=9606 GN=NPM1 PE=1 SV=2
775	494	P61160|ARP2_HUMAN	133.83	25	0	0	0	18	17	0				251	103		6	6	0	0	0	7	4	0	Carbamidomethylation; Phosphorylation (STY)	44761	Actin-related protein 2 OS=Homo sapiens OX=9606 GN=ACTR2 PE=1 SV=1
434	621	Q93091|RNAS6_HUMAN	133.8	49	14	14	26	31	37	26	368	0	546	2740	475	636	5	5	3	2	5	13	6	5	Carbamidomethylation; Acetylation (Protein N-term); Phosphorylation (STY)	17196	Ribonuclease K6 OS=Homo sapiens OX=9606 GN=RNASE6 PE=1 SV=2
560	600	O14793|GDF8_HUMAN	133.22	20	4	13	4	13	4	4	139	199	103	382	154	97.4	6	5	2	5	3	8	1	2	Carbamidomethylation; Phosphorylation (STY)	42750	Growth/differentiation factor 8 OS=Homo sapiens OX=9606 GN=MSTN PE=1 SV=1
342	582	Q96AQ6|PBIP1_HUMAN	133.18	11	3	8	3	7	5	3	5040	4310	1460	6490	3100	7080	5	5	8	10	8	11	8	9	Oxidation (M); Phosphorylation (STY)	80643	Pre-B-cell leukemia transcription factor-interacting protein 1 OS=Homo sapiens OX=9606 GN=PBXIP1 PE=1 SV=1
737	461	P62826|RAN_HUMAN	132.8	49	0	10	0	10	28	16		97.7		283	0	475	6	6	0	7	0	2	2	3	Carbamidomethylation; Oxidation (M); Acetylation (Protein N-term); Phosphorylation (STY)	24423	GTP-binding nuclear protein Ran OS=Homo sapiens OX=9606 GN=RAN PE=1 SV=3
320	927	P09651|ROA1_HUMAN	132.27	27	3	3	7	25	4	9	765	214	3590	2940	4720	5730	9	8	9	3	12	15	15	17	Acetylation (Protein N-term); Phosphorylation (STY)	38747	Heterogeneous nuclear ribonucleoprotein A1 OS=Homo sapiens OX=9606 GN=HNRNPA1 PE=1 SV=5
921	552	Q8IWY4|SCUB1_HUMAN	132.17	12	0	0	0	12	0	2				462		54.1	6	6	0	0	0	7	0	1	Carbamidomethylation; Phosphorylation (STY)	107910	Signal peptide CUB and EGF-like domain-containing protein 1 OS=Homo sapiens OX=9606 GN=SCUBE1 PE=1 SV=3
259	1876	P02724|GLPA_HUMAN	131.59	21	21	21	21	21	21	21	161	2190	1280	348	0	10200	2	2	3	22	13	6	2	51	Phosphorylation (STY)	16331	Glycophorin-A OS=Homo sapiens OX=9606 GN=GYPA PE=1 SV=2
696	544	Q9C0C9|UBE2O_HUMAN	131.29	17	2	0	0	0	3	12	0				0	1600	9	9	1	0	0	0	1	18	Carbamidomethylation; Acetylation (Protein N-term); Phosphorylation (STY)	141293	(E3-independent) E2 ubiquitin-conjugating enzyme OS=Homo sapiens OX=9606 GN=UBE2O PE=1 SV=3
752	553	P50395|GDIB_HUMAN	131.17	18	7	0	0	11	18	7	11.2			67.7	81.3	16	5	5	2	0	0	3	9	3	Oxidation (M); Phosphorylation (STY)	50663	Rab GDP dissociation inhibitor beta OS=Homo sapiens OX=9606 GN=GDI2 PE=1 SV=2
425	617	P01772|HV333_HUMAN	130.68	51	25	25	19	31	25	45							5	0	6	4	3	15	4	4	Carbamidomethylation; Oxidation (M); Phosphorylation (STY)	13074	Immunoglobulin heavy variable 3-33 OS=Homo sapiens OX=9606 GN=IGHV3-33 PE=1 SV=2
801	513	Q6P9A2|GLT18_HUMAN	129.89	11	2	0	0	9	2	0	0			217	0		5	5	2	0	0	8	2	0	Acetylation (Protein N-term); Phosphorylation (STY)	69561	Polypeptide N-acetylgalactosaminyltransferase 18 OS=Homo sapiens OX=9606 GN=GALNT18 PE=2 SV=2
559	593	Q04917|1433F_HUMAN	129.85	28	4	11	4	18	18	8		252		331	109	157	6	5	1	4	1	8	6	4	Carbamidomethylation; Oxidation (M); Acetylation (Protein N-term); Phosphorylation (STY)	28219	14-3-3 protein eta OS=Homo sapiens OX=9606 GN=YWHAH PE=1 SV=4
420	569	P13521|SCG2_HUMAN	129.68	15	4	11	7	10	10	8	588	243	236	1130	1910	995	7	7	8	8	4	10	10	5	Phosphorylation (STY)	70941	Secretogranin-2 OS=Homo sapiens OX=9606 GN=SCG2 PE=1 SV=2
802	630	P20810|ICAL_HUMAN	129.03	17	0	0	4	10	5	17			36.2	169	35.3	518	4	4	0	0	1	4	1	6	Carbamidomethylation; Phosphorylation (STY)	76573	Calpastatin OS=Homo sapiens OX=9606 GN=CAST PE=1 SV=4
618	743	P13861|KAP2_HUMAN	128.83	15	9	9	6	15	6	9	253	3220	165	6730	1060	3070	5	5	2	3	1	8	7	5	Carbamidomethylation; Phosphorylation (STY)	45518	cAMP-dependent protein kinase type II-alpha regulatory subunit OS=Homo sapiens OX=9606 GN=PRKAR2A PE=1 SV=2
829	682	Q9Y4L1|HYOU1_HUMAN	128.72	9	0	2	0	7	0	1		11100		1470		634	6	6	0	1	0	11	0	1	Phosphorylation (STY)	111335	Hypoxia up-regulated protein 1 OS=Homo sapiens OX=9606 GN=HYOU1 PE=1 SV=1
404	521	Q9NZP8|C1RL_HUMAN	128.37	13	2	2	2	13	4	5				109		0	6	4	2	2	3	25	6	7	Phosphorylation (STY)	53498	Complement C1r subcomponent-like protein OS=Homo sapiens OX=9606 GN=C1RL PE=1 SV=2
315	2217	P22466|GALA_HUMAN	128.37	19	19	19	19	19	19	19	1330	531	1310	2660	3840	3020	3	3	10	5	7	10	12	18	Phosphorylation (STY)	13302	Galanin peptides OS=Homo sapiens OX=9606 GN=GAL PE=1 SV=3
473	1066	P31947|1433S_HUMAN	128.06	30	30	13	4	23	13	13	35.6	14.8		371	121	56.8	4	3	4	5	1	9	7	3	Carbamidomethylation; Oxidation (M); Phosphorylation (STY)	27774	14-3-3 protein sigma OS=Homo sapiens OX=9606 GN=SFN PE=1 SV=1
969	458	P43146|DCC_HUMAN	127.95	6	0	0	2	6	0	0			0	367			7	7	0	0	1	6	0	0	Carbamidomethylation; Oxidation (M); Acetylation (Protein N-term); Phosphorylation (STY)	158456	Netrin receptor DCC OS=Homo sapiens OX=9606 GN=DCC PE=1 SV=2
589	471	Q96RW7|HMCN1_HUMAN	127.89	6	2	0	2	3	2	1	346	70.8	6590	13900	548	1760	19	19	7	1	13	11	6	9	Carbamidomethylation; Oxidation (M); Acetylation (Protein N-term); Phosphorylation (STY)	613396	Hemicentin-1 OS=Homo sapiens OX=9606 GN=HMCN1 PE=1 SV=2
866	543	Q03167|TGBR3_HUMAN	127.43	13	0	0	0	7	2	8				635	788	0	8	8	0	0	0	9	2	4	Carbamidomethylation; Oxidation (M); Acetylation (Protein N-term); Phosphorylation (STY)	93499	Transforming growth factor beta receptor type 3 OS=Homo sapiens OX=9606 GN=TGFBR3 PE=1 SV=3
411	583	Q99983|OMD_HUMAN	127.39	19	15	17	5	9	6	8	103	363	199	2980	127	642	5	5	6	10	2	9	2	9	Phosphorylation (STY)	49492	Osteomodulin OS=Homo sapiens OX=9606 GN=OMD PE=1 SV=1
426	618	P01768|HV330_HUMAN	127.23	51	25	25	19	31	25	45	20.1	211	166	1070	107	142	5	1	7	4	3	14	4	4	Carbamidomethylation; Oxidation (M); Phosphorylation (STY)	12947	Immunoglobulin heavy variable 3-30 OS=Homo sapiens OX=9606 GN=IGHV3-30 PE=1 SV=2
426	619	P0DP03|HV335_HUMAN	127.23	51	25	25	19	31	25	45	20.1	211	166	1070	107	142	5	1	7	4	3	14	4	4	Carbamidomethylation; Oxidation (M); Phosphorylation (STY)	12947	Immunoglobulin heavy variable 3-30-5 OS=Homo sapiens OX=9606 GN=IGHV3-30-5 PE=3 SV=1
419	729	Q99456|K1C12_HUMAN	126.13	21	16	5	5	5	7	21	0					0	5	2	7	4	3	7	10	9	Carbamidomethylation; Oxidation (M); Acetylation (Protein N-term); Phosphorylation (STY)	53511	Keratin type I cytoskeletal 12 OS=Homo sapiens OX=9606 GN=KRT12 PE=1 SV=1
1083	803	O15204|ADEC1_HUMAN	126.02	11	0	0	0	11	5	0				386	231		4	4	0	0	0	5	1	0	Carbamidomethylation; Acetylation (Protein N-term); Phosphorylation (STY)	52775	ADAM DEC1 OS=Homo sapiens OX=9606 GN=ADAMDEC1 PE=1 SV=2
459	586	Q05655|KPCD_HUMAN	125.73	14	7	7	10	4	9	12	156	63.5	370	384	1050	1060	6	6	4	3	6	3	9	9	Carbamidomethylation; Acetylation (Protein N-term); Phosphorylation (STY)	77505	Protein kinase C delta type OS=Homo sapiens OX=9606 GN=PRKCD PE=1 SV=2
327	674	P14314|GLU2B_HUMAN	125.49	10	2	3	2	9	2	4	1270	792	657	1030	1760	1480	5	5	11	8	8	10	9	10	Oxidation (M); Acetylation (Protein N-term); Phosphorylation (STY)	59426	Glucosidase 2 subunit beta OS=Homo sapiens OX=9606 GN=PRKCSH PE=1 SV=2
532	656	P49746|TSP3_HUMAN	125.16	16	11	7	6	11	6	11	309	164	204	334	270	95.4	4	4	7	3	2	6	3	5	Carbamidomethylation; Oxidation (M); Phosphorylation (STY)	104201	Thrombospondin-3 OS=Homo sapiens OX=9606 GN=THBS3 PE=1 SV=1
524	694	Q92619|HMHA1_HUMAN	124.93	11	3	0	7	3	8	6	0		79	241	1060	710	10	10	1	0	6	4	12	9	Carbamidomethylation; Oxidation (M); Acetylation (Protein N-term); Phosphorylation (STY)	124614	Rho GTPase-activating protein 45 OS=Homo sapiens OX=9606 GN=ARHGAP45 PE=1 SV=2
531	531	Q9Y696|CLIC4_HUMAN	124.86	32	9	9	9	32	9	15	472	236	62.4	622	212	0	5	5	6	3	3	10	3	4	Carbamidomethylation; Oxidation (M); Phosphorylation (STY)	28772	Chloride intracellular channel protein 4 OS=Homo sapiens OX=9606 GN=CLIC4 PE=1 SV=4
285	844	P51674|GPM6A_HUMAN	124.63	8	8	6	8	6	8	6	1180	1560	1500	809	1810	973	4	4	25	16	16	11	21	15	Phosphorylation (STY)	31210	Neuronal membrane glycoprotein M6-a OS=Homo sapiens OX=9606 GN=GPM6A PE=1 SV=2
400	872	O00499|BIN1_HUMAN	124.61	11	3	3	11	3	6	6	133	81.6	790	431	866	978	5	5	3	7	13	4	12	9	Carbamidomethylation; Phosphorylation (STY)	64699	Myc box-dependent-interacting protein 1 OS=Homo sapiens OX=9606 GN=BIN1 PE=1 SV=1
915	620	O00584|RNT2_HUMAN	124.49	26	0	0	0	26	14	5				373	164	234	4	4	0	0	0	10	2	2	Carbamidomethylation; Acetylation (Protein N-term); Phosphorylation (STY)	29481	Ribonuclease T2 OS=Homo sapiens OX=9606 GN=RNASET2 PE=1 SV=2
389	1044	Q9Y6R1|S4A4_HUMAN	124.49	4	3	2	4	2	2	2	895	720	607	837	234	1020	4	4	12	10	9	9	5	10	Carbamidomethylation; Phosphorylation (STY)	121460	Electrogenic sodium bicarbonate cotransporter 1 OS=Homo sapiens OX=9606 GN=SLC4A4 PE=1 SV=1
496	950	O00567|NOP56_HUMAN	124.14	20	3	0	4	8	11	15	263		530	332	2030	2320	8	8	1	0	2	5	11	13	Oxidation (M); Acetylation (Protein N-term); Phosphorylation (STY)	66050	Nucleolar protein 56 OS=Homo sapiens OX=9606 GN=NOP56 PE=1 SV=4
592	572	P02462|CO4A1_HUMAN	123.69	13	0	2	1	6	2	5		127	157	972	219	204	10	8	0	1	4	11	2	5	Carbamidomethylation; Phosphorylation (STY)	160611	Collagen alpha-1(IV) chain OS=Homo sapiens OX=9606 GN=COL4A1 PE=1 SV=4
597	596	Q9BXJ3|C1QT4_HUMAN	123.66	24	4	4	16	18	0	4	0	0	35.3	1850		0	6	6	2	2	4	11	0	1	Oxidation (M); Acetylation (Protein N-term); Phosphorylation (STY)	35256	Complement C1q tumor necrosis factor-related protein 4 OS=Homo sapiens OX=9606 GN=C1QTNF4 PE=1 SV=2
483	801	Q8ND56|LS14A_HUMAN	123.31	12	3	5	12	5	12	12	117	90.6	680	0	2560	1640	5	5	1	3	11	3	10	8	Phosphorylation (STY)	50530	Protein LSM14 homolog A OS=Homo sapiens OX=9606 GN=LSM14A PE=1 SV=3
330	661	P02730|B3AT_HUMAN	123.24	9	2	2	2	4	2	9	107	5360	172	237	164	13000	5	5	2	23	1	4	1	32	Carbamidomethylation; Phosphorylation (STY)	101792	Band 3 anion transport protein OS=Homo sapiens OX=9606 GN=SLC4A1 PE=1 SV=3
943	638	Q96BZ4|PLD4_HUMAN	122.98	14	0	0	0	13	4	8				582	0	263	5	5	0	0	0	4	1	2	Carbamidomethylation; Phosphorylation (STY)	55626	Phospholipase D4 OS=Homo sapiens OX=9606 GN=PLD4 PE=2 SV=2
518	770	P07948|LYN_HUMAN	122.77	9	9	7	5	0	5	5	745	258	363		496	474	5	5	8	5	5	0	5	3	Phosphorylation (STY)	58574	Tyrosine-protein kinase Lyn OS=Homo sapiens OX=9606 GN=LYN PE=1 SV=3
463	642	Q92911|SC5A5_HUMAN	122.69	9	5	7	5	2	4	5	539	526	95.5	163	156	397	4	4	6	9	6	1	3	6	Carbamidomethylation; Phosphorylation (STY)	68666	Sodium/iodide cotransporter OS=Homo sapiens OX=9606 GN=SLC5A5 PE=1 SV=1
936	444	P09622|DLDH_HUMAN	122.19	17	2	0	0	17	0	2	0			1070		31.9	7	7	1	0	0	7	0	2	Oxidation (M); Acetylation (Protein N-term); Phosphorylation (STY)	54177	Dihydrolipoyl dehydrogenase mitochondrial OS=Homo sapiens OX=9606 GN=DLD PE=1 SV=2
1039	670	Q92896|GSLG1_HUMAN	122.09	9	0	1	1	5	2	0		35.5	1930	301	68.2		8	8	0	1	1	6	1	0	Carbamidomethylation; Phosphorylation (STY)	134552	Golgi apparatus protein 1 OS=Homo sapiens OX=9606 GN=GLG1 PE=1 SV=2
982	883	P30044|PRDX5_HUMAN	121.8	50	0	0	7	43	19	0			53.6	496	104		6	6	0	0	1	7	3	0	Carbamidomethylation; Acetylation (Protein N-term); Phosphorylation (STY)	22086	Peroxiredoxin-5 mitochondrial OS=Homo sapiens OX=9606 GN=PRDX5 PE=1 SV=4
376	1072	Q27J81|INF2_HUMAN	121.75	6	4	5	4	4	5	4	940	764	414	579	930	356	4	4	6	8	6	5	12	5	Phosphorylation (STY)	135624	Inverted formin-2 OS=Homo sapiens OX=9606 GN=INF2 PE=1 SV=2
694	701	Q92932|PTPR2_HUMAN	121.53	10	3	3	4	4	1	1	173	307	50.6	485	239	341	6	6	2	3	3	4	2	1	Oxidation (M); Phosphorylation (STY)	111271	Receptor-type tyrosine-protein phosphatase N2 OS=Homo sapiens OX=9606 GN=PTPRN2 PE=1 SV=2
498	657	P0DP04|HV43D_HUMAN	121.48	45	15	25	23	41	25	15		49.8	0	562	17.8	36.5	5	3	2	3	3	13	5	2	Carbamidomethylation; Oxidation (M); Phosphorylation (STY)	13017	Immunoglobulin heavy variable 3-43D OS=Homo sapiens OX=9606 GN=IGHV3-43D PE=3 SV=1
859	679	Q7Z406|MYH14_HUMAN	121.42	10	0	1	2	7	3	1		9.1	90.2	743	54.6	130	15	11	0	2	2	15	4	2	Carbamidomethylation; Oxidation (M); Acetylation (Protein N-term); Phosphorylation (STY)	227868	Myosin-14 OS=Homo sapiens OX=9606 GN=MYH14 PE=1 SV=2
408	812	Q13790|APOF_HUMAN	121.08	15	7	7	7	15	3	10	635	517	3850	1710	407	1180	4	4	5	6	9	9	2	8	Carbamidomethylation; Phosphorylation (STY)	35400	Apolipoprotein F OS=Homo sapiens OX=9606 GN=APOF PE=1 SV=2
439	591	Q8NE71|ABCF1_HUMAN	120.91	12	4	5	5	5	10	6	1610	2290	1090	6510	2090	1980	7	7	9	11	5	7	12	14	Phosphorylation (STY)	95926	ATP-binding cassette sub-family F member 1 OS=Homo sapiens OX=9606 GN=ABCF1 PE=1 SV=2
677	678	Q14956|GPNMB_HUMAN	120.72	14	1	0	4	7	5	6	0		0	1160	45.3	149	6	6	1	0	1	8	3	3	Oxidation (M); Acetylation (Protein N-term); Phosphorylation (STY)	63923	Transmembrane glycoprotein NMB OS=Homo sapiens OX=9606 GN=GPNMB PE=1 SV=2
563	843	A0A075B6K5|LV39_HUMAN	120.31	50	33	50	19	33	10	10	617	320	388	1580	69.5	158	4	4	5	6	3	9	1	2	Carbamidomethylation; Acetylation (Protein N-term); Phosphorylation (STY)	12332	Immunoglobulin lambda variable 3-9 OS=Homo sapiens OX=9606 GN=IGLV3-9 PE=3 SV=1
986	604	P17987|TCPA_HUMAN	120.03	10	3	0	3	6	3	7	115		47.3	489	238	223	4	4	2	0	1	2	2	5	Carbamidomethylation; Acetylation (Protein N-term); Phosphorylation (STY)	60344	T-complex protein 1 subunit alpha OS=Homo sapiens OX=9606 GN=TCP1 PE=1 SV=1
759	610	P21291|CSRP1_HUMAN	119.95	30	8	0	0	30	8	13	103			401	111	164	4	4	1	0	0	6	4	3	Phosphorylation (STY)	20567	Cysteine and glycine-rich protein 1 OS=Homo sapiens OX=9606 GN=CSRP1 PE=1 SV=3
406	711	P60660|MYL6_HUMAN	119.87	33	11	11	0	33	19	11	0	46.1		1580	929	0	5	5	3	5	0	17	9	3	Oxidation (M); Phosphorylation (STY)	16930	Myosin light polypeptide 6 OS=Homo sapiens OX=9606 GN=MYL6 PE=1 SV=2
469	398	Q86X29|LSR_HUMAN	119.62	17	11	8	8	10	6	7	4270	880	2300	2250	1380	1430	9	9	12	10	6	9	9	9	Phosphorylation (STY)	71439	Lipolysis-stimulated lipoprotein receptor OS=Homo sapiens OX=9606 GN=LSR PE=1 SV=4
437	523	Q08357|S20A2_HUMAN	119.29	8	8	8	5	7	7	7	1470	492	774	1140	1760	1410	5	5	14	12	6	7	8	10	Phosphorylation (STY)	70392	Sodium-dependent phosphate transporter 2 OS=Homo sapiens OX=9606 GN=SLC20A2 PE=1 SV=1
1003	681	Q9NT22|EMIL3_HUMAN	119.27	11	3	0	0	9	0	7	0			332		152	6	6	2	0	0	8	0	3	Carbamidomethylation; Phosphorylation (STY)	82647	EMILIN-3 OS=Homo sapiens OX=9606 GN=EMILIN3 PE=1 SV=2
321	836	P22004|BMP6_HUMAN	119.21	19	5	5	13	11	5	7	6970	5670	9460	7830	13600	14900	6	6	11	11	8	11	9	16	Oxidation (M); Acetylation (Protein N-term); Phosphorylation (STY)	57226	Bone morphogenetic protein 6 OS=Homo sapiens OX=9606 GN=BMP6 PE=1 SV=1
909	507	Q9H4A3|WNK1_HUMAN	118.69	6	1	1	1	1	3	3	30.8	0	57.2	481	23.2	732	8	8	1	1	1	2	2	7	Carbamidomethylation; Oxidation (M); Phosphorylation (STY)	250791	Serine/threonine-protein kinase WNK1 OS=Homo sapiens OX=9606 GN=WNK1 PE=1 SV=2
823	546	Q66K74|MAP1S_HUMAN	118.53	17	0	2	5	3	10	4		112	165	303	134	242	8	8	0	1	4	2	4	3	Carbamidomethylation; Acetylation (Protein N-term); Phosphorylation (STY)	112211	Microtubule-associated protein 1S OS=Homo sapiens OX=9606 GN=MAP1S PE=1 SV=2
504	629	A0A0B4J1Y9|HV372_HUMAN	118.45	39	15	15	24	24	15	9			2600	680			5	2	3	3	4	16	5	4	Carbamidomethylation; Phosphorylation (STY)	13203	Immunoglobulin heavy variable 3-72 OS=Homo sapiens OX=9606 GN=IGHV3-72 PE=3 SV=1
903	910	P11137|MTAP2_HUMAN	118.3	14	4	3	4	3	6	2	23	597	2690	815	156	1690	17	17	3	4	9	3	4	3	Carbamidomethylation; Oxidation (M); Acetylation (Protein N-term); Phosphorylation (STY)	199525	Microtubule-associated protein 2 OS=Homo sapiens OX=9606 GN=MAP2 PE=1 SV=4
930	581	Q9HCK4|ROBO2_HUMAN	117.97	6	1	0	0	5	0	0	80.5			243			5	5	1	0	0	7	0	0	Carbamidomethylation; Phosphorylation (STY)	151199	Roundabout homolog 2 OS=Homo sapiens OX=9606 GN=ROBO2 PE=1 SV=2
450	766	O14745|NHRF1_HUMAN	117.94	15	5	5	5	9	11	5	1020	918	1260	837	1470	3410	3	3	6	5	3	7	4	5	Phosphorylation (STY)	38868	Na(+)/H(+) exchange regulatory cofactor NHE-RF1 OS=Homo sapiens OX=9606 GN=SLC9A3R1 PE=1 SV=4
360	891	P17096|HMGA1_HUMAN	117.89	39	18	0	18	26	18	31	452		626	1070	1600	2580	4	4	6	0	4	10	9	18	Acetylation (Protein N-term); Phosphorylation (STY)	11676	High mobility group protein HMG-I/HMG-Y OS=Homo sapiens OX=9606 GN=HMGA1 PE=1 SV=3
968	580	Q9HAR2|AGRL3_HUMAN	117.56	6	1	0	1	4	0	1	0		48.2	172		373	6	6	1	0	1	5	0	1	Carbamidomethylation; Oxidation (M); Acetylation (Protein N-term); Phosphorylation (STY)	161812	Adhesion G protein-coupled receptor L3 OS=Homo sapiens OX=9606 GN=ADGRL3 PE=1 SV=2
1070	486	Q16543|CDC37_HUMAN	117.47	24	0	4	0	16	0	4		0		152		63.1	6	6	0	1	0	4	0	1	Phosphorylation (STY)	44468	Hsp90 co-chaperone Cdc37 OS=Homo sapiens OX=9606 GN=CDC37 PE=1 SV=1
723	726	Q92608|DOCK2_HUMAN	116.64	4	1	0	2	1	2	2	0		254	0	383	506	6	6	1	0	5	1	3	5	Oxidation (M); Phosphorylation (STY)	211947	Dedicator of cytokinesis protein 2 OS=Homo sapiens OX=9606 GN=DOCK2 PE=1 SV=2
415	1808	P06310|KV230_HUMAN	116.18	35	17	17	32	20	17	17	464	617	1640	6230	663	1740	4	2	6	6	7	9	4	9	Carbamidomethylation; Phosphorylation (STY)	13185	Immunoglobulin kappa variable 2-30 OS=Homo sapiens OX=9606 GN=IGKV2-30 PE=3 SV=2
864	752	Q10471|GALT2_HUMAN	115.92	12	6	0	0	7	3	4	1250			427	1330	32.4	6	6	2	0	0	6	1	1	Oxidation (M); Phosphorylation (STY)	64733	Polypeptide N-acetylgalactosaminyltransferase 2 OS=Homo sapiens OX=9606 GN=GALNT2 PE=1 SV=1
457	966	P11171|41_HUMAN	115.89	10	0	2	2	2	1	7		248	2210	940	361	1510	6	6	0	17	1	2	1	20	Carbamidomethylation; Acetylation (Protein N-term); Phosphorylation (STY)	97017	Protein 4.1 OS=Homo sapiens OX=9606 GN=EPB41 PE=1 SV=4
755	772	P07711|CATL1_HUMAN	115.67	35	0	0	31	25	21	4			0	827	0	0	4	4	0	0	5	4	2	1	Carbamidomethylation; Oxidation (M); Phosphorylation (STY)	37564	Cathepsin L1 OS=Homo sapiens OX=9606 GN=CTSL PE=1 SV=2
727	628	Q9Y3Q8|T22D4_HUMAN	115.52	26	0	4	0	0	14	12		36.5			9030	375	7	7	0	3	0	0	3	9	Carbamidomethylation; Acetylation (Protein N-term); Phosphorylation (STY)	41026	TSC22 domain family protein 4 OS=Homo sapiens OX=9606 GN=TSC22D4 PE=1 SV=2
892	597	Q8N3T1|GLT15_HUMAN	114.91	15	4	0	0	11	4	4	138			133	269	0	5	5	1	0	0	7	1	1	Carbamidomethylation; Phosphorylation (STY)	73063	Polypeptide N-acetylgalactosaminyltransferase 15 OS=Homo sapiens OX=9606 GN=GALNT15 PE=2 SV=2
760	759	Q14103|HNRPD_HUMAN	114.86	16	0	0	7	9	13	12			41.1	253	455	2020	5	5	0	0	1	5	6	3	Phosphorylation (STY)	38434	Heterogeneous nuclear ribonucleoprotein D0 OS=Homo sapiens OX=9606 GN=HNRNPD PE=1 SV=1
684	1478	Q92876|KLK6_HUMAN	114.69	13	7	7	13	13	7	7	0	0	0	342	0	0	3	3	2	1	4	5	1	2	Carbamidomethylation; Phosphorylation (STY)	26856	Kallikrein-6 OS=Homo sapiens OX=9606 GN=KLK6 PE=1 SV=1
489	644	A0A0B4J1V6|HV373_HUMAN	114.59	45	15	24	26	24	26	9			6.41		0		6	2	3	8	4	12	6	4	Carbamidomethylation; Phosphorylation (STY)	12858	Immunoglobulin heavy variable 3-73 OS=Homo sapiens OX=9606 GN=IGHV3-73 PE=3 SV=1
1041	868	A0A0C4DH67|KV108_HUMAN	114.57	62	30	30	30	62	30	30	3480	740	0	512	0	1320	4	4	3	1	1	6	2	2	Carbamidomethylation; Phosphorylation (STY)	12537	Immunoglobulin kappa variable 1-8 OS=Homo sapiens OX=9606 GN=IGKV1-8 PE=3 SV=1
380	1825	Q15019|SEPT2_HUMAN	114.5	6	4	4	4	6	6	6	1190	806	2150	1660	3880	5170	2	2	3	5	2	7	10	12	Phosphorylation (STY)	41487	Septin-2 OS=Homo sapiens OX=9606 GN=SEPTIN2 PE=1 SV=1
1001	457	O75083|WDR1_HUMAN	114.24	26	10	0	0	11	5	0	0			149	11.3		7	7	2	0	0	5	1	0	Carbamidomethylation; Phosphorylation (STY)	66194	WD repeat-containing protein 1 OS=Homo sapiens OX=9606 GN=WDR1 PE=1 SV=4
687	831	P15531|NDKA_HUMAN	114.08	30	11	17	0	30	24	11				40.7	0		3	1	1	4	0	4	2	7	Carbamidomethylation; Phosphorylation (STY)	17149	Nucleoside diphosphate kinase A OS=Homo sapiens OX=9606 GN=NME1 PE=1 SV=1
590	693	O75475|PSIP1_HUMAN	114.05	25	0	6	10	11	9	12		16.9	2280	60.6	906	796	8	8	0	1	7	4	4	7	Acetylation (Protein N-term); Phosphorylation (STY)	60103	PC4 and SFRS1-interacting protein OS=Homo sapiens OX=9606 GN=PSIP1 PE=1 SV=1
976	501	P27448|MARK3_HUMAN	113.83	14	0	0	0	1	2	11				51.2	0	649	7	7	0	0	0	1	1	6	Carbamidomethylation; Acetylation (Protein N-term); Phosphorylation (STY)	84428	MAP/microtubule affinity-regulating kinase 3 OS=Homo sapiens OX=9606 GN=MARK3 PE=1 SV=5
712	809	P67809|YBOX1_HUMAN	113.32	15	0	0	0	0	9	15					112	368	3	3	0	0	0	0	4	8	Phosphorylation (STY)	35924	Nuclease-sensitive element-binding protein 1 OS=Homo sapiens OX=9606 GN=YBX1 PE=1 SV=3
385	2165	P01615|KVD28_HUMAN	113.03	34	17	17	17	34	17	17	339	923	2240	8070	833	1800	3	2	4	7	7	16	5	6	Carbamidomethylation; Acetylation (Protein N-term); Phosphorylation (STY)	12957	Immunoglobulin kappa variable 2D-28 OS=Homo sapiens OX=9606 GN=IGKV2D-28 PE=1 SV=2
385	2166	A0A075B6P5|KV228_HUMAN	113.03	34	17	17	17	34	17	17	339	923	2240	8070	833	1800	3	2	4	7	7	16	5	6	Carbamidomethylation; Acetylation (Protein N-term); Phosphorylation (STY)	12957	Immunoglobulin kappa variable 2-28 OS=Homo sapiens OX=9606 GN=IGKV2-28 PE=3 SV=1
601	781	Q9UL51|HCN2_HUMAN	112.89	7	7	7	2	4	7	7	209	31.5	0	20.9	97.3	146	3	3	5	3	1	2	5	5	Carbamidomethylation; Phosphorylation (STY)	96950	Potassium/sodium hyperpolarization-activated cyclic nucleotide-gated channel 2 OS=Homo sapiens OX=9606 GN=HCN2 PE=1 SV=3
428	878	P60981|DEST_HUMAN	112.88	28	7	7	7	25	7	19	3210	2120	2220	3480	3980	6090	4	4	5	3	5	8	4	9	Carbamidomethylation; Acetylation (Protein N-term); Phosphorylation (STY)	18506	Destrin OS=Homo sapiens OX=9606 GN=DSTN PE=1 SV=3
927	562	O00560|SDCB1_HUMAN	112.75	35	15	3	15	35	10	7	127	0	114	563	0	107	5	5	2	1	2	6	1	3	Carbamidomethylation; Acetylation (Protein N-term); Phosphorylation (STY)	32444	Syntenin-1 OS=Homo sapiens OX=9606 GN=SDCBP PE=1 SV=1
928	614	P78417|GSTO1_HUMAN	112.48	22	0	5	0	22	0	5		81.6		401		153	5	5	0	2	0	5	0	2	Carbamidomethylation; Phosphorylation (STY)	27566	Glutathione S-transferase omega-1 OS=Homo sapiens OX=9606 GN=GSTO1 PE=1 SV=2
650	1121	P02743|SAMP_HUMAN	112.39	15	14	6	6	12	6	10	240	0	152	344	0	395	4	4	3	2	1	5	1	3	Phosphorylation (STY)	25387	Serum amyloid P-component OS=Homo sapiens OX=9606 GN=APCS PE=1 SV=2
912	854	Q9UKU9|ANGL2_HUMAN	111.92	10	4	5	2	8	4	8	245	48.2	263	1730	314	96.2	5	5	3	2	1	7	2	3	Carbamidomethylation; Acetylation (Protein N-term); Phosphorylation (STY)	57105	Angiopoietin-related protein 2 OS=Homo sapiens OX=9606 GN=ANGPTL2 PE=1 SV=1
667	636	Q01484|ANK2_HUMAN	111.61	2	1	1	0	1	0	1	300	165	163	346	201	0	6	6	5	8	1	4	2	3	Phosphorylation (STY)	433719	Ankyrin-2 OS=Homo sapiens OX=9606 GN=ANK2 PE=1 SV=4
661	805	Q15942|ZYX_HUMAN	111.22	8	2	0	2	2	4	8	90		91.2	101	566	369	3	3	3	0	1	1	5	5	Phosphorylation (STY)	61277	Zyxin OS=Homo sapiens OX=9606 GN=ZYX PE=1 SV=1
672	551	Q8N1N4|K2C78_HUMAN	111.13	29	1	3	10	9	9	13		0	67	0	0	0	8	5	1	1	6	8	2	4	Carbamidomethylation; Oxidation (M); Acetylation (Protein N-term); Phosphorylation (STY)	56866	Keratin type II cytoskeletal 78 OS=Homo sapiens OX=9606 GN=KRT78 PE=1 SV=2
652	719	A0A0C4DH38|HV551_HUMAN	110.99	83	0	6	56	53	14	20		0	24.7	1720	43.5	21	6	4	0	1	5	13	1	6	Carbamidomethylation; Oxidation (M); Phosphorylation (STY)	12675	Immunoglobulin heavy variable 5-51 OS=Homo sapiens OX=9606 GN=IGHV5-51 PE=3 SV=1
663	1386	Q8ND76|CCNY_HUMAN	110.24	9	4	4	9	4	9	9	192	194	161	96.3	463	75.8	3	3	1	2	3	1	5	3	Carbamidomethylation; Phosphorylation (STY)	39337	Cyclin-Y OS=Homo sapiens OX=9606 GN=CCNY PE=1 SV=2
370	1104	Q9H3T3|SEM6B_HUMAN	110.15	6	6	6	6	6	6	6	365	69.6	0	659	149	532	4	4	8	11	4	12	7	14	Phosphorylation (STY)	95285	Semaphorin-6B OS=Homo sapiens OX=9606 GN=SEMA6B PE=1 SV=4
784	1038	O95218|ZRAB2_HUMAN	109.94	18	0	0	18	4	10	10			706	70.3	491	902	6	6	0	0	4	2	3	5	Phosphorylation (STY)	37404	Zinc finger Ran-binding domain-containing protein 2 OS=Homo sapiens OX=9606 GN=ZRANB2 PE=1 SV=2
858	459	Q14315|FLNC_HUMAN	109.45	5	1	1	1	3	2	2	0	1040	818	1340	848	110	9	5	7	6	3	10	7	8	Carbamidomethylation; Oxidation (M); Acetylation (Protein N-term); Phosphorylation (STY)	291020	Filamin-C OS=Homo sapiens OX=9606 GN=FLNC PE=1 SV=3
624	1119	Q9NPD7|NRN1_HUMAN	109.36	32	11	11	11	28	32	11	98.3	125	90	384	214	259	3	3	1	2	1	4	4	4	Carbamidomethylation; Oxidation (M); Phosphorylation (STY)	15333	Neuritin OS=Homo sapiens OX=9606 GN=NRN1 PE=2 SV=1
630	1529	P51397|DAP1_HUMAN	109.08	38	38	35	35	25	38	38	2080	1380	1890	68.3	1370	1360	3	3	5	4	4	2	5	5	Acetylation (Protein N-term); Phosphorylation (STY)	11165	Death-associated protein 1 OS=Homo sapiens OX=9606 GN=DAP PE=1 SV=3
1156	1180	O75326|SEM7A_HUMAN	108.93	7	5	2	0	4	0	0	0	0		306			3	3	1	1	0	2	0	0	Phosphorylation (STY)	74824	Semaphorin-7A OS=Homo sapiens OX=9606 GN=SEMA7A PE=1 SV=1
579	713	Q96GW7|PGCB_HUMAN	108.87	12	3	3	5	8	7	5	291	501	315	1050	369	223	5	4	2	5	5	12	6	5	Carbamidomethylation; Oxidation (M); Acetylation (Protein N-term); Phosphorylation (STY)	99118	Brevican core protein OS=Homo sapiens OX=9606 GN=BCAN PE=1 SV=2
519	3262	P15515|HIS1_HUMAN	108.75	37	37	28	28	37	28	37	657	645	425	1640	1670	927	2	2	3	4	1	7	4	4	Phosphorylation (STY)	6963	Histatin-1 OS=Homo sapiens OX=9606 GN=HTN1 PE=1 SV=2
564	1700	Q96A00|PP14A_HUMAN	108.42	23	23	23	20	23	23	23	169	272	179	1320	450	847	4	4	6	4	3	5	6	6	Phosphorylation (STY)	16693	Protein phosphatase 1 regulatory subunit 14A OS=Homo sapiens OX=9606 GN=PPP1R14A PE=1 SV=1
758	637	Q86YV0|RASL3_HUMAN	108.06	7	0	0	3	4	2	3			155	4630	0	153	5	5	0	0	3	3	2	5	Oxidation (M); Phosphorylation (STY)	111898	RAS protein activator like-3 OS=Homo sapiens OX=9606 GN=RASAL3 PE=1 SV=2
412	1112	Q16666|IF16_HUMAN	107.98	5	3	0	5	5	5	5	0		313	249	908	700	3	3	1	0	8	7	17	15	Oxidation (M); Phosphorylation (STY)	88256	Gamma-interferon-inducible protein 16 OS=Homo sapiens OX=9606 GN=IFI16 PE=1 SV=3
1060	741	P22352|GPX3_HUMAN	107.91	34	0	10	0	23	0	0		0		678			6	6	0	2	0	5	0	0	Carbamidomethylation; Phosphorylation (STY)	25552	Glutathione peroxidase 3 OS=Homo sapiens OX=9606 GN=GPX3 PE=1 SV=2
731	584	P13667|PDIA4_HUMAN	107.87	12	0	0	5	11	3	3			3220	272	124	266	6	6	0	0	2	7	4	1	Acetylation (Protein N-term); Phosphorylation (STY)	72933	Protein disulfide-isomerase A4 OS=Homo sapiens OX=9606 GN=PDIA4 PE=1 SV=2
460	635	P42167|LAP2B_HUMAN	107.59	13	0	0	11	7	13	13			205	42.5	1250	1170	6	6	0	0	6	2	13	14	Phosphorylation (STY)	50670	Lamina-associated polypeptide 2 isoforms beta/gamma OS=Homo sapiens OX=9606 GN=TMPO PE=1 SV=2
654	1068	P62258|1433E_HUMAN	107.54	11	4	4	4	11	11	4				243	117		2	1	1	3	1	4	5	2	Oxidation (M); Phosphorylation (STY)	29174	14-3-3 protein epsilon OS=Homo sapiens OX=9606 GN=YWHAE PE=1 SV=1
623	1173	P35659|DEK_HUMAN	107.36	17	0	0	13	7	17	13			466	237	2070	1200	4	4	0	0	7	2	8	6	Carbamidomethylation; Oxidation (M); Acetylation (Protein N-term); Phosphorylation (STY)	42674	Protein DEK OS=Homo sapiens OX=9606 GN=DEK PE=1 SV=1
695	871	Q15846|CLUL1_HUMAN	107.29	9	4	4	6	6	7	4	1630	421	414	537	682	1200	4	4	2	2	2	2	3	4	Carbamidomethylation; Phosphorylation (STY)	54215	Clusterin-like protein 1 OS=Homo sapiens OX=9606 GN=CLUL1 PE=2 SV=1
785	1097	Q04759|KPCT_HUMAN	107.14	9	0	0	3	0	4	9			78.1		141	193	3	3	0	0	1	0	5	4	Carbamidomethylation; Phosphorylation (STY)	81865	Protein kinase C theta type OS=Homo sapiens OX=9606 GN=PRKCQ PE=1 SV=3
700	725	Q5T848|GP158_HUMAN	107.12	6	0	1	2	3	1	3		0	0	816	0	26.4	6	6	0	1	3	7	1	3	Oxidation (M); Phosphorylation (STY)	135489	Probable G-protein coupled receptor 158 OS=Homo sapiens OX=9606 GN=GPR158 PE=1 SV=1
497	934	P17612|KAPCA_HUMAN	106.54	14	6	6	6	8	12	6	74.1	52	79.1	160	2280	355	4	4	3	2	4	5	12	4	Carbamidomethylation; Acetylation (Protein N-term); Phosphorylation (STY)	40590	cAMP-dependent protein kinase catalytic subunit alpha OS=Homo sapiens OX=9606 GN=PRKACA PE=1 SV=2
497	1487	P22694|KAPCB_HUMAN	106.54	8	6	6	6	8	6	6	74.1	52	79.1	160	701	355	3	3	3	2	4	5	10	4	Carbamidomethylation; Acetylation (Protein N-term); Phosphorylation (STY)	40623	cAMP-dependent protein kinase catalytic subunit beta OS=Homo sapiens OX=9606 GN=PRKACB PE=1 SV=2
497	2161	P22612|KAPCG_HUMAN	106.54	12	6	6	6	6	12	6	74.1	52	79.1	160	787	355	3	3	3	2	4	4	11	4	Carbamidomethylation; Oxidation (M); Phosphorylation (STY)	40435	cAMP-dependent protein kinase catalytic subunit gamma OS=Homo sapiens OX=9606 GN=PRKACG PE=1 SV=3
904	738	P12107|COBA1_HUMAN	106.53	10	3	1	2	4	3	3	20.1	0	4260	24600	3970	144	10	9	2	1	2	13	5	3	Carbamidomethylation; Acetylation (Protein N-term); Phosphorylation (STY)	181064	Collagen alpha-1(XI) chain OS=Homo sapiens OX=9606 GN=COL11A1 PE=1 SV=4
715	1235	Q7Z5R6|AB1IP_HUMAN	106.36	6	2	2	2	6	6	6	88	52.2	256	335	547	636	3	3	1	1	1	2	4	6	Carbamidomethylation; Phosphorylation (STY)	73183	Amyloid beta A4 precursor protein-binding family B member 1-interacting protein OS=Homo sapiens OX=9606 GN=APBB1IP PE=1 SV=1
705	2082	O00193|SMAP_HUMAN	106.12	14	14	0	14	14	14	14	128		207	424	2210	1230	4	4	2	0	2	1	7	8	Phosphorylation (STY)	20333	Small acidic protein OS=Homo sapiens OX=9606 GN=SMAP PE=1 SV=1
800	626	Q15365|PCBP1_HUMAN	106.02	26	0	0	5	20	11	5			70.3	266	217	53	5	5	0	0	3	4	3	1	Carbamidomethylation; Oxidation (M); Phosphorylation (STY)	37498	Poly(rC)-binding protein 1 OS=Homo sapiens OX=9606 GN=PCBP1 PE=1 SV=2
286	1208	Q9NZ72|STMN3_HUMAN	105.96	15	9	14	9	9	14	10	4850	1340	942	977	1720	1930	3	3	14	13	8	8	12	15	Oxidation (M); Phosphorylation (STY)	21017	Stathmin-3 OS=Homo sapiens OX=9606 GN=STMN3 PE=1 SV=3
810	1293	Q05519|SRS11_HUMAN	105.43	6	0	0	3	5	5	5			251	419	846	514	3	3	0	0	2	3	4	3	Phosphorylation (STY)	53542	Serine/arginine-rich splicing factor 11 OS=Homo sapiens OX=9606 GN=SRSF11 PE=1 SV=1
1139	955	Q99439|CNN2_HUMAN	105.36	34	23	12	0	11	17	12	0	95.8		60.7	0	72.5	4	4	2	2	0	2	2	2	Carbamidomethylation; Acetylation (Protein N-term); Phosphorylation (STY)	33697	Calponin-2 OS=Homo sapiens OX=9606 GN=CNN2 PE=1 SV=4
992	804	P14207|FOLR2_HUMAN	105.32	15	7	0	5	13	0	5	959		74.2	226		143	4	4	1	0	1	3	0	1	Carbamidomethylation; Phosphorylation (STY)	29280	Folate receptor beta OS=Homo sapiens OX=9606 GN=FOLR2 PE=1 SV=4
709	2587	Q96MW1|CCD43_HUMAN	105.17	15	15	15	15	15	15	9	226	216	353	0	481	392	2	2	2	2	2	2	3	1	Phosphorylation (STY)	25248	Coiled-coil domain-containing protein 43 OS=Homo sapiens OX=9606 GN=CCDC43 PE=1 SV=2
996	1692	Q99733|NP1L4_HUMAN	104.2	12	0	0	0	7	7	12				91.3	0	3160	3	3	0	0	0	1	1	7	Acetylation (Protein N-term); Phosphorylation (STY)	42823	Nucleosome assembly protein 1-like 4 OS=Homo sapiens OX=9606 GN=NAP1L4 PE=1 SV=1
720	744	Q07666|KHDR1_HUMAN	104.11	30	3	6	5	3	21	5	105	27.4	812	154	421	490	9	9	1	1	2	1	8	6	Oxidation (M); Acetylation (Protein N-term); Phosphorylation (STY)	48227	KH domain-containing RNA-binding signal transduction-associated protein 1 OS=Homo sapiens OX=9606 GN=KHDRBS1 PE=1 SV=1
870	763	Q9UKB5|AJAP1_HUMAN	104.08	13	0	0	0	12	2	9				310	25.5	89.6	4	4	0	0	0	5	2	4	Phosphorylation (STY)	44536	Adherens junction-associated protein 1 OS=Homo sapiens OX=9606 GN=AJAP1 PE=1 SV=1
604	1569	P36507|MP2K2_HUMAN	103.91	12	3	3	3	3	3	12	635	432	451	129	702	2920	3	3	4	3	4	3	2	8	Phosphorylation (STY)	44424	Dual specificity mitogen-activated protein kinase kinase 2 OS=Homo sapiens OX=9606 GN=MAP2K2 PE=1 SV=1
747	1428	Q9UEW8|STK39_HUMAN	103.86	6	3	3	0	0	3	6					104	114	2	1	1	2	0	0	2	6	Carbamidomethylation; Oxidation (M); Phosphorylation (STY)	59474	STE20/SPS1-related proline-alanine-rich protein kinase OS=Homo sapiens OX=9606 GN=STK39 PE=1 SV=3
668	515	Q9UKV3|ACINU_HUMAN	103.72	8	1	3	1	4	4	4	0	177	250	7540	509	662	11	11	1	2	3	7	7	7	Oxidation (M); Acetylation (Protein N-term); Phosphorylation (STY)	151861	Apoptotic chromatin condensation inducer in the nucleus OS=Homo sapiens OX=9606 GN=ACIN1 PE=1 SV=2
1053	900	P27695|APEX1_HUMAN	103.48	24	0	0	3	14	6	10			48.1	142	0	59.2	4	4	0	0	1	5	2	1	Carbamidomethylation; Acetylation (Protein N-term); Phosphorylation (STY)	35555	DNA-(apurinic or apyrimidinic site) lyase OS=Homo sapiens OX=9606 GN=APEX1 PE=1 SV=2
673	689	Q9NSB2|KRT84_HUMAN	103.44	13	1	0	1	13	1	2				99.7			6	4	1	0	2	11	1	4	Carbamidomethylation; Acetylation (Protein N-term); Phosphorylation (STY)	64842	Keratin type II cuticular Hb4 OS=Homo sapiens OX=9606 GN=KRT84 PE=2 SV=2
790	570	Q6ZSJ9|SHSA6_HUMAN	103.34	17	2	6	0	6	7	2	79.4	110		632	40.4	0	6	6	2	3	0	6	1	2	Carbamidomethylation; Acetylation (Protein N-term); Phosphorylation (STY)	55764	Protein shisa-6 OS=Homo sapiens OX=9606 GN=SHISA6 PE=1 SV=2
995	1473	Q15459|SF3A1_HUMAN	103.31	6	0	0	0	0	6	4					69.2	0	2	2	0	0	0	0	6	1	Oxidation (M); Phosphorylation (STY)	88886	Splicing factor 3A subunit 1 OS=Homo sapiens OX=9606 GN=SF3A1 PE=1 SV=1
547	784	O75822|EIF3J_HUMAN	103.13	34	22	14	13	8	10	14	380	55.9	97.4	12.2	149	2080	6	6	4	6	2	3	4	11	Carbamidomethylation; Oxidation (M); Acetylation (Protein N-term); Phosphorylation (STY)	29062	Eukaryotic translation initiation factor 3 subunit J OS=Homo sapiens OX=9606 GN=EIF3J PE=1 SV=2
1136	592	P35556|FBN2_HUMAN	103.1	6	2	0	1	2	2	1	986		0	74.4	576	0	9	6	3	1	1	4	2	2	Carbamidomethylation; Oxidation (M); Acetylation (Protein N-term); Phosphorylation (STY)	314775	Fibrillin-2 OS=Homo sapiens OX=9606 GN=FBN2 PE=1 SV=3
781	690	Q9Y2W1|TR150_HUMAN	103.06	8	1	0	5	3	4	4	0		80	204	529	1130	10	10	3	0	2	5	6	15	Acetylation (Protein N-term); Phosphorylation (STY)	108666	Thyroid hormone receptor-associated protein 3 OS=Homo sapiens OX=9606 GN=THRAP3 PE=1 SV=2
850	1008	P09486|SPRC_HUMAN	102.87	20	0	4	17	17	4	13		78.9	0	382	34.4	115	4	4	0	2	1	4	1	2	Carbamidomethylation; Oxidation (M); Acetylation (Protein N-term); Phosphorylation (STY)	34632	SPARC OS=Homo sapiens OX=9606 GN=SPARC PE=1 SV=1
551	1200	Q9NQG5|RPR1B_HUMAN	102.8	18	0	4	14	11	14	14		0	306	87.6	658	513	3	3	0	1	4	2	10	5	Phosphorylation (STY)	36900	Regulation of nuclear pre-mRNA domain-containing protein 1B OS=Homo sapiens OX=9606 GN=RPRD1B PE=1 SV=1
1235	2492	Q15029|U5S1_HUMAN	102.77	3	0	0	0	0	3	3					0	51.2	1	1	0	0	0	0	2	1	Oxidation (M); Acetylation (Protein N-term); Phosphorylation (STY)	109436	116 kDa U5 small nuclear ribonucleoprotein component OS=Homo sapiens OX=9606 GN=EFTUD2 PE=1 SV=1
617	495	Q9HBL0|TENS1_HUMAN	102.74	5	2	0	1	0	2	4	73.4		0		152	1490	6	6	3	0	1	0	6	9	Carbamidomethylation; Phosphorylation (STY)	185700	Tensin-1 OS=Homo sapiens OX=9606 GN=TNS1 PE=1 SV=2
980	632	O15335|CHAD_HUMAN	102.69	35	0	8	0	30	0	4		0		473		27.6	7	7	0	2	0	9	0	1	Carbamidomethylation; Acetylation (Protein N-term); Phosphorylation (STY)	40476	Chondroadherin OS=Homo sapiens OX=9606 GN=CHAD PE=1 SV=2
628	938	P61978|HNRPK_HUMAN	102.3	11	0	0	8	8	10	3			0	269	487	176	4	3	0	0	1	8	6	4	Carbamidomethylation; Acetylation (Protein N-term); Phosphorylation (STY)	50976	Heterogeneous nuclear ribonucleoprotein K OS=Homo sapiens OX=9606 GN=HNRNPK PE=1 SV=1
375	762	P82987|ATL3_HUMAN	102.15	11	3	5	2	3	2	5	1020	712	0	619	1400	1450	9	9	11	10	1	8	7	12	Carbamidomethylation; Acetylation (Protein N-term); Phosphorylation (STY)	188691	ADAMTS-like protein 3 OS=Homo sapiens OX=9606 GN=ADAMTSL3 PE=1 SV=4
621	539	P27816|MAP4_HUMAN	102.14	9	2	0	0	4	5	7	84.4			1150	772	421	7	7	2	0	0	5	9	8	Carbamidomethylation; Phosphorylation (STY)	121005	Microtubule-associated protein 4 OS=Homo sapiens OX=9606 GN=MAP4 PE=1 SV=3
971	608	Q9UKM7|MA1B1_HUMAN	101.8	10	0	0	0	7	0	5				253		13200	5	5	0	0	0	6	0	2	Phosphorylation (STY)	79580	Endoplasmic reticulum mannosyl-oligosaccharide 1 2-alpha-mannosidase OS=Homo sapiens OX=9606 GN=MAN1B1 PE=1 SV=2
970	1001	Q0ZGT2|NEXN_HUMAN	101.7	11	4	2	3	5	6	0	0	15.1	408	2680	1100		5	5	1	1	1	4	6	0	Carbamidomethylation; Oxidation (M); Acetylation (Protein N-term); Phosphorylation (STY)	80658	Nexilin OS=Homo sapiens OX=9606 GN=NEXN PE=1 SV=1
472	881	O95747|OXSR1_HUMAN	101.68	9	7	9	4	4	4	9	232	567	113	240	529	4310	3	2	4	8	2	2	3	20	Carbamidomethylation; Oxidation (M); Phosphorylation (STY)	58022	Serine/threonine-protein kinase OSR1 OS=Homo sapiens OX=9606 GN=OXSR1 PE=1 SV=1
875	666	Q86Y82|STX12_HUMAN	101.63	21	0	0	4	21	4	0			44.9	253	72.2		4	4	0	0	1	7	1	0	Carbamidomethylation; Phosphorylation (STY)	31642	Syntaxin-12 OS=Homo sapiens OX=9606 GN=STX12 PE=1 SV=1
891	564	O60243|H6ST1_HUMAN	101.41	23	0	13	0	10	0	0		0		341			5	4	0	1	0	7	0	0	Carbamidomethylation; Acetylation (Protein N-term); Phosphorylation (STY)	48226	Heparan-sulfate 6-O-sulfotransferase 1 OS=Homo sapiens OX=9606 GN=HS6ST1 PE=1 SV=5
1044	659	P14923|PLAK_HUMAN	101.35	15	5	0	2	8	0	0	0		122	526			6	6	1	0	1	5	0	0	Carbamidomethylation; Oxidation (M); Acetylation (Protein N-term); Phosphorylation (STY)	81745	Junction plakoglobin OS=Homo sapiens OX=9606 GN=JUP PE=1 SV=3
423	791	Q8IWU5|SULF2_HUMAN	100.28	10	4	1	1	6	2	1	2770	1430	1470	1430	1850	2360	8	8	10	3	6	6	7	7	Carbamidomethylation; Phosphorylation (STY)	100455	Extracellular sulfatase Sulf-2 OS=Homo sapiens OX=9606 GN=SULF2 PE=1 SV=1
669	612	Q14CN4|K2C72_HUMAN	100.25	18	11	0	2	7	9	3	0				0		6	2	1	0	2	8	1	3	Carbamidomethylation; Oxidation (M); Phosphorylation (STY)	55877	Keratin type II cytoskeletal 72 OS=Homo sapiens OX=9606 GN=KRT72 PE=1 SV=2
593	672	P02545|LMNA_HUMAN	99.99	8	4	3	3	2	4	6	520	152	459	101	679	910	5	5	8	4	4	2	5	6	Phosphorylation (STY)	74140	Prelamin-A/C OS=Homo sapiens OX=9606 GN=LMNA PE=1 SV=1
656	2299	P22059|OSBP1_HUMAN	99.96	3	2	2	2	2	2	3	128	103	171	158	258	471	2	2	2	2	1	3	4	3	Phosphorylation (STY)	89421	Oxysterol-binding protein 1 OS=Homo sapiens OX=9606 GN=OSBP PE=1 SV=1
948	788	P53396|ACLY_HUMAN	99.68	7	0	1	0	2	4	3		34.3		39.5	25	255	5	5	0	1	0	1	4	3	Phosphorylation (STY)	120839	ATP-citrate synthase OS=Homo sapiens OX=9606 GN=ACLY PE=1 SV=3
902	847	P22234|PUR6_HUMAN	99.32	11	0	0	0	11	0	7				293		179	3	3	0	0	0	6	0	2	Phosphorylation (STY)	47079	Multifunctional protein ADE2 OS=Homo sapiens OX=9606 GN=PAICS PE=1 SV=3
541	951	Q9HA90|EFCC1_HUMAN	99	13	6	9	9	6	6	9	253	52.3	451	335	450	2880	4	4	3	3	6	4	3	4	Acetylation (Protein N-term); Phosphorylation (STY)	65702	EF-hand and coiled-coil domain-containing protein 1 OS=Homo sapiens OX=9606 GN=EFCC1 PE=2 SV=2
724	906	Q9Y2V2|CHSP1_HUMAN	98.51	14	14	14	0	5	14	14	298	196		254	534	3750	6	6	5	8	0	1	4	16	Phosphorylation (STY)	15892	Calcium-regulated heat-stable protein 1 OS=Homo sapiens OX=9606 GN=CARHSP1 PE=1 SV=2
1162	815	O00232|PSD12_HUMAN	98.15	15	0	7	4	4	5	0		131	37.7	0	0		4	4	0	3	2	1	1	0	Carbamidomethylation; Phosphorylation (STY)	52904	26S proteasome non-ATPase regulatory subunit 12 OS=Homo sapiens OX=9606 GN=PSMD12 PE=1 SV=3
993	1098	Q02880|TOP2B_HUMAN	97.89	3	0	0	0	0	2	3					51.9	84.2	3	3	0	0	0	0	3	3	Phosphorylation (STY)	183266	DNA topoisomerase 2-beta OS=Homo sapiens OX=9606 GN=TOP2B PE=1 SV=3
1150	799	O60462|NRP2_HUMAN	97.64	9	0	0	4	5	0	0			0	225			4	4	0	0	1	3	0	0	Phosphorylation (STY)	104831	Neuropilin-2 OS=Homo sapiens OX=9606 GN=NRP2 PE=1 SV=3
1283	876	P25774|CATS_HUMAN	97.55	21	0	3	6	8	7	0		0	2240	440	0		6	6	0	2	2	2	1	0	Carbamidomethylation; Acetylation (Protein N-term); Phosphorylation (STY)	37496	Cathepsin S OS=Homo sapiens OX=9606 GN=CTSS PE=1 SV=3
280	760	Q14CZ8|HECAM_HUMAN	97.46	16	16	7	13	7	13	7	1540	906	294	1190	1360	775	4	4	25	22	13	8	20	16	Phosphorylation (STY)	46027	Hepatocyte cell adhesion molecule OS=Homo sapiens OX=9606 GN=HEPACAM PE=1 SV=1
721	1018	P11717|MPRI_HUMAN	97.33	2	2	1	2	2	2	2	136	0	123	85.8	125	212	4	4	2	2	4	2	2	3	Phosphorylation (STY)	274373	Cation-independent mannose-6-phosphate receptor OS=Homo sapiens OX=9606 GN=IGF2R PE=1 SV=3
726	1243	P60174|TPIS_HUMAN	97.32	10	5	0	5	10	5	5	220		377	355	111	177	2	2	1	0	1	6	2	1	Phosphorylation (STY)	30791	Triosephosphate isomerase OS=Homo sapiens OX=9606 GN=TPI1 PE=1 SV=3
884	773	P00568|KAD1_HUMAN	96.92	32	0	12	0	22	0	25		309		107		259	6	6	0	3	0	3	0	4	Carbamidomethylation; Acetylation (Protein N-term); Phosphorylation (STY)	21635	Adenylate kinase isoenzyme 1 OS=Homo sapiens OX=9606 GN=AK1 PE=1 SV=3
674	896	Q6E0U4|DMKN_HUMAN	96.75	17	4	10	15	0	5	9	0	246	576		258	2770	7	7	3	4	4	0	3	5	Acetylation (Protein N-term); Phosphorylation (STY)	47082	Dermokine OS=Homo sapiens OX=9606 GN=DMKN PE=1 SV=3
683	2092	Q99613|EIF3C_HUMAN	96.74	2	0	1	1	1	2	2		56.1	358	213	562	893	2	2	0	3	1	1	5	3	Phosphorylation (STY)	105344	Eukaryotic translation initiation factor 3 subunit C OS=Homo sapiens OX=9606 GN=EIF3C PE=1 SV=1
683	2093	B5ME19|EIFCL_HUMAN	96.74	2	0	1	1	1	2	2		56.1	358	213	562	893	2	2	0	3	1	1	5	3	Phosphorylation (STY)	105473	Eukaryotic translation initiation factor 3 subunit C-like protein OS=Homo sapiens OX=9606 GN=EIF3CL PE=3 SV=1
664	1687	P04216|THY1_HUMAN	96.66	16	0	6	6	16	6	6		114	542	473	310	182	2	2	0	2	2	7	2	2	Phosphorylation (STY)	17935	Thy-1 membrane glycoprotein OS=Homo sapiens OX=9606 GN=THY1 PE=1 SV=2
521	3008	Q07960|RHG01_HUMAN	96.17	4	3	3	4	4	4	4	1420	876	919	923	753	3020	2	2	2	2	4	4	4	9	Phosphorylation (STY)	50436	Rho GTPase-activating protein 1 OS=Homo sapiens OX=9606 GN=ARHGAP1 PE=1 SV=1
872	858	P09417|DHPR_HUMAN	95.53	25	17	0	0	16	7	7	0			840	61.8	167	4	4	2	0	0	6	1	2	Carbamidomethylation; Oxidation (M); Acetylation (Protein N-term); Phosphorylation (STY)	25790	Dihydropteridine reductase OS=Homo sapiens OX=9606 GN=QDPR PE=1 SV=2
629	1485	P27824|CALX_HUMAN	94.81	6	3	5	2	5	5	6	0	330	492	1550	1200	2830	3	3	1	7	2	4	5	5	Phosphorylation (STY)	67568	Calnexin OS=Homo sapiens OX=9606 GN=CANX PE=1 SV=2
824	1442	Q16849|PTPRN_HUMAN	94.78	3	2	2	2	3	2	2	678	0	115	520	726	790	3	3	4	3	1	10	6	5	Phosphorylation (STY)	105847	Receptor-type tyrosine-protein phosphatase-like N OS=Homo sapiens OX=9606 GN=PTPRN PE=1 SV=1
665	691	P20930|FILA_HUMAN	94.68	3	1	1	1	1	0	2	3500	2310	3220	2080	0	2380	8	8	5	8	6	11	4	8	Acetylation (Protein N-term); Phosphorylation (STY)	435180	Filaggrin OS=Homo sapiens OX=9606 GN=FLG PE=1 SV=3
659	1372	P17252|KPCA_HUMAN	94.48	5	3	3	0	3	5	5	66.9	28.1		101	416	418	2	2	2	2	0	2	6	3	Carbamidomethylation; Phosphorylation (STY)	76750	Protein kinase C alpha type OS=Homo sapiens OX=9606 GN=PRKCA PE=1 SV=4
675	1019	Q05639|EF1A2_HUMAN	94.41	20	6	0	0	9	14	13	0			92.3	364	92.7	4	4	1	0	0	6	8	4	Carbamidomethylation; Phosphorylation (STY)	50470	Elongation factor 1-alpha 2 OS=Homo sapiens OX=9606 GN=EEF1A2 PE=1 SV=1
734	1246	Q9BUH6|PAXX_HUMAN	94.13	15	0	0	15	0	15	15			54.6		414	488	3	3	0	0	5	0	7	5	Phosphorylation (STY)	21640	Protein PAXX OS=Homo sapiens OX=9606 GN=PAXX PE=1 SV=2
735	2372	A0A0C4DH68|KV224_HUMAN	93.75	20	6	0	20	17	6	17			0	646		0	3	2	1	0	4	3	2	4	Phosphorylation (STY)	13079	Immunoglobulin kappa variable 2-24 OS=Homo sapiens OX=9606 GN=IGKV2-24 PE=3 SV=1
682	1340	P52943|CRIP2_HUMAN	93.6	17	8	8	8	17	8	8	178	81.2	89.3	384	182	350	2	2	1	2	1	7	2	2	Carbamidomethylation; Phosphorylation (STY)	22493	Cysteine-rich protein 2 OS=Homo sapiens OX=9606 GN=CRIP2 PE=1 SV=1
788	827	Q14195|DPYL3_HUMAN	93.27	7	5	2	2	5	2	2	848	244	347	1080	702	977	3	3	6	3	1	3	5	7	Phosphorylation (STY)	61963	Dihydropyrimidinase-related protein 3 OS=Homo sapiens OX=9606 GN=DPYSL3 PE=1 SV=1
1121	2251	P21815|SIAL_HUMAN	93.03	4	0	0	0	0	4	0					1360		2	2	0	0	0	0	4	0	Phosphorylation (STY)	35147	Bone sialoprotein 2 OS=Homo sapiens OX=9606 GN=IBSP PE=1 SV=4
1120	1474	Q6UXK2|ISLR2_HUMAN	92.93	6	0	0	0	1	0	5				76.6		50.1	2	2	0	0	0	3	0	1	Phosphorylation (STY)	78990	Immunoglobulin superfamily containing leucine-rich repeat protein 2 OS=Homo sapiens OX=9606 GN=ISLR2 PE=2 SV=1
972	1029	P31323|KAP3_HUMAN	92.72	15	5	5	0	13	6	5	136	0		89.7	144	0	4	4	1	1	0	4	4	2	Carbamidomethylation; Acetylation (Protein N-term); Phosphorylation (STY)	46302	cAMP-dependent protein kinase type II-beta regulatory subunit OS=Homo sapiens OX=9606 GN=PRKAR2B PE=1 SV=3
1079	715	Q92626|PXDN_HUMAN	92.56	2	0	0	0	2	0	1				355		47.4	4	4	0	0	0	4	0	1	Carbamidomethylation; Phosphorylation (STY)	165274	Peroxidasin homolog OS=Homo sapiens OX=9606 GN=PXDN PE=1 SV=2
528	1107	Q13263|TIF1B_HUMAN	92.38	8	0	0	4	4	4	8			284	333	742	1040	3	3	0	0	5	5	5	9	Carbamidomethylation; Oxidation (M); Acetylation (Protein N-term); Phosphorylation (STY)	88550	Transcription intermediary factor 1-beta OS=Homo sapiens OX=9606 GN=TRIM28 PE=1 SV=5
565	1147	O43497|CAC1G_HUMAN	92.33	2	2	2	0	2	1	2	57.5	42.3		60.2	44	66.9	2	2	4	4	0	2	1	7	Phosphorylation (STY)	262469	Voltage-dependent T-type calcium channel subunit alpha-1G OS=Homo sapiens OX=9606 GN=CACNA1G PE=1 SV=3
1153	756	Q92614|MY18A_HUMAN	92.23	3	0	0	0	0	2	2					45.3	31.4	3	3	0	0	0	0	3	2	Phosphorylation (STY)	233113	Unconventional myosin-XVIIIa OS=Homo sapiens OX=9606 GN=MYO18A PE=1 SV=3
1148	807	Q2UY09|COSA1_HUMAN	92.17	7	3	0	1	4	0	1	69.7		0	152		0	6	6	2	0	1	4	0	1	Acetylation (Protein N-term); Phosphorylation (STY)	116657	Collagen alpha-1(XXVIII) chain OS=Homo sapiens OX=9606 GN=COL28A1 PE=2 SV=2
546	771	P04279|SEMG1_HUMAN	91.88	16	4	12	6	2	8	4	383	463	1300	550	1590	1150	4	4	4	6	4	2	7	5	Phosphorylation (STY)	52131	Semenogelin-1 OS=Homo sapiens OX=9606 GN=SEMG1 PE=1 SV=2
896	855	P02775|CXCL7_HUMAN	91.73	27	0	12	0	20	0	27		27.3		317		605	3	3	0	2	0	4	0	5	Carbamidomethylation; Phosphorylation (STY)	13894	Platelet basic protein OS=Homo sapiens OX=9606 GN=PPBP PE=1 SV=3
780	895	Q9NWH9|SLTM_HUMAN	91.58	12	7	0	2	3	2	6	225		1670	4220	401	1890	9	9	3	0	2	3	4	6	Oxidation (M); Acetylation (Protein N-term); Phosphorylation (STY)	117149	SAFB-like transcription modulator OS=Homo sapiens OX=9606 GN=SLTM PE=1 SV=2
633	1463	Q08174|PCDH1_HUMAN	91.54	3	2	2	0	2	3	2	283	326		187	93	129	3	3	3	4	0	3	3	3	Phosphorylation (STY)	114743	Protocadherin-1 OS=Homo sapiens OX=9606 GN=PCDH1 PE=1 SV=2
833	908	Q9UEY8|ADDG_HUMAN	91.23	7	2	3	4	2	4	7	118	80.6	156	140	288	380	6	4	2	4	3	1	4	6	Phosphorylation (STY)	79155	Gamma-adducin OS=Homo sapiens OX=9606 GN=ADD3 PE=1 SV=1
939	1167	P07384|CAN1_HUMAN	91.19	11	0	0	0	7	7	0				44	52		3	3	0	0	0	2	6	0	Carbamidomethylation; Phosphorylation (STY)	81890	Calpain-1 catalytic subunit OS=Homo sapiens OX=9606 GN=CAPN1 PE=1 SV=1
949	1826	Q8TD20|GTR12_HUMAN	91.14	4	2	2	4	0	0	0	74.9	332	202				3	3	3	3	3	0	0	0	Acetylation (Protein N-term); Phosphorylation (STY)	66966	Solute carrier family 2 facilitated glucose transporter member 12 OS=Homo sapiens OX=9606 GN=SLC2A12 PE=2 SV=1
611	1226	P12643|BMP2_HUMAN	91.06	17	17	10	6	6	10	10	152	44.8	196	17.7	463	252	3	3	3	5	1	3	5	2	Carbamidomethylation; Phosphorylation (STY)	44702	Bone morphogenetic protein 2 OS=Homo sapiens OX=9606 GN=BMP2 PE=1 SV=1
730	720	Q8N350|CBARP_HUMAN	90.82	13	8	4	2	7	2	4	269	54.6	215	568	136	305	5	5	5	3	2	4	1	3	Acetylation (Protein N-term); Phosphorylation (STY)	73929	Voltage-dependent calcium channel beta subunit-associated regulatory protein OS=Homo sapiens OX=9606 GN=CBARP PE=1 SV=3
545	1655	Q6PCE3|PGM2L_HUMAN	90.64	8	0	2	0	0	0	8		0				4160	3	3	0	3	0	0	0	25	Carbamidomethylation; Oxidation (M); Phosphorylation (STY)	70442	Glucose 1 6-bisphosphate synthase OS=Homo sapiens OX=9606 GN=PGM2L1 PE=1 SV=3
1266	944	P15259|PGAM2_HUMAN	89.58	21	0	11	11	10	11	4		0	67.9		162		3	1	0	1	2	2	1	1	Carbamidomethylation; Acetylation (Protein N-term); Phosphorylation (STY)	28766	Phosphoglycerate mutase 2 OS=Homo sapiens OX=9606 GN=PGAM2 PE=1 SV=3
827	995	O60504|VINEX_HUMAN	89.54	9	2	0	7	7	3	3	65.2		82.2	12.9	258	218	3	3	2	0	2	2	2	3	Carbamidomethylation; Oxidation (M); Phosphorylation (STY)	75341	Vinexin OS=Homo sapiens OX=9606 GN=SORBS3 PE=1 SV=2
1054	1103	Q9BT09|CNPY3_HUMAN	89.51	17	6	7	7	11	7	6	6160	0	10500	212	201	2230	3	3	2	1	1	2	1	1	Carbamidomethylation; Phosphorylation (STY)	30748	Protein canopy homolog 3 OS=Homo sapiens OX=9606 GN=CNPY3 PE=1 SV=1
706	823	Q14498|RBM39_HUMAN	89.26	9	0	1	7	5	5	5			210	302	1340	843	5	4	0	1	3	2	6	5	Acetylation (Protein N-term); Phosphorylation (STY)	59380	RNA-binding protein 39 OS=Homo sapiens OX=9606 GN=RBM39 PE=1 SV=2
348	1784	Q8NBP7|PCSK9_HUMAN	88.98	3	2	2	2	3	2	2	5040	4200	3550	2550	2860	3950	3	3	17	13	11	6	9	11	Phosphorylation (STY)	74286	Proprotein convertase subtilisin/kexin type 9 OS=Homo sapiens OX=9606 GN=PCSK9 PE=1 SV=3
867	1397	P36952|SPB5_HUMAN	88.87	17	5	3	5	10	5	5	0	0	152	73	50	0	4	4	1	1	1	3	2	2	Oxidation (M); Acetylation (Protein N-term); Phosphorylation (STY)	42100	Serpin B5 OS=Homo sapiens OX=9606 GN=SERPINB5 PE=1 SV=2
1335	1440	Q8WVC0|LEO1_HUMAN	88.85	4	0	0	0	0	2	2					30.5	62.2	2	2	0	0	0	0	1	3	Phosphorylation (STY)	75404	RNA polymerase-associated protein LEO1 OS=Homo sapiens OX=9606 GN=LEO1 PE=1 SV=1
693	1375	Q99442|SEC62_HUMAN	88.7	14	14	14	3	10	10	10	556	442	1140	960	286	872	4	4	9	8	4	10	7	5	Carbamidomethylation; Acetylation (Protein N-term); Phosphorylation (STY)	45862	Translocation protein SEC62 OS=Homo sapiens OX=9606 GN=SEC62 PE=1 SV=1
753	1114	P23327|SRCH_HUMAN	88.19	7	4	7	4	7	4	4	55.9	182	69.4	137	175	204	2	2	4	5	1	2	2	1	Phosphorylation (STY)	80244	Sarcoplasmic reticulum histidine-rich calcium-binding protein OS=Homo sapiens OX=9606 GN=HRC PE=1 SV=1
1309	997	Q9Y6C2|EMIL1_HUMAN	88.17	4	0	0	0	2	0	1				0		91.2	3	3	0	0	0	2	0	3	Acetylation (Protein N-term); Phosphorylation (STY)	106695	EMILIN-1 OS=Homo sapiens OX=9606 GN=EMILIN1 PE=1 SV=3
653	2151	P23193|TCEA1_HUMAN	88.1	5	5	5	5	5	5	5	0	0	425	28.6	1090	929	2	2	3	1	2	1	7	5	Phosphorylation (STY)	33970	Transcription elongation factor A protein 1 OS=Homo sapiens OX=9606 GN=TCEA1 PE=1 SV=2
1088	859	P68363|TBA1B_HUMAN	87.89	11	0	0	0	8	7	4				197	1550	1970	3	3	0	0	0	3	2	2	Carbamidomethylation; Acetylation (Protein N-term); Phosphorylation (STY)	50152	Tubulin alpha-1B chain OS=Homo sapiens OX=9606 GN=TUBA1B PE=1 SV=1
1088	863	Q71U36|TBA1A_HUMAN	87.89	11	0	0	0	8	7	4				197	1550	1970	3	3	0	0	0	3	2	2	Carbamidomethylation; Acetylation (Protein N-term); Phosphorylation (STY)	50136	Tubulin alpha-1A chain OS=Homo sapiens OX=9606 GN=TUBA1A PE=1 SV=1
1088	1290	Q6PEY2|TBA3E_HUMAN	87.89	8	0	0	0	8	4	4				197	1550	1970	2	2	0	0	0	3	1	2	Carbamidomethylation; Acetylation (Protein N-term); Phosphorylation (STY)	49859	Tubulin alpha-3E chain OS=Homo sapiens OX=9606 GN=TUBA3E PE=1 SV=2
1088	1295	P0DPH8|TBA3D_HUMAN	87.89	8	0	0	0	8	4	4				197	1550	1970	2	2	0	0	0	3	1	2	Carbamidomethylation; Acetylation (Protein N-term); Phosphorylation (STY)	49960	Tubulin alpha-3D chain OS=Homo sapiens OX=9606 GN=TUBA3D PE=1 SV=1
1088	1296	P0DPH7|TBA3C_HUMAN	87.89	8	0	0	0	8	4	4				197	1550	1970	2	2	0	0	0	3	1	2	Carbamidomethylation; Acetylation (Protein N-term); Phosphorylation (STY)	49960	Tubulin alpha-3C chain OS=Homo sapiens OX=9606 GN=TUBA3C PE=1 SV=1
444	3283	O75674|TM1L1_HUMAN	87.68	6	6	6	6	5	5	6	381	377	640	280	392	417	2	2	11	9	6	3	5	5	Phosphorylation (STY)	52989	TOM1-like protein 1 OS=Homo sapiens OX=9606 GN=TOM1L1 PE=1 SV=2
728	1227	Q86UE4|LYRIC_HUMAN	87.43	15	0	0	3	10	3	9			36.8	63.6	156	384	5	5	0	0	2	4	5	7	Acetylation (Protein N-term); Phosphorylation (STY)	63837	Protein LYRIC OS=Homo sapiens OX=9606 GN=MTDH PE=1 SV=2
922	740	Q04826|1B40_HUMAN	87.35	22	0	7	0	8	6	9							5	0	0	1	0	3	2	2	Carbamidomethylation; Acetylation (Protein N-term); Phosphorylation (STY)	40505	HLA class I histocompatibility antigen B-40 alpha chain OS=Homo sapiens OX=9606 GN=HLA-B PE=1 SV=1
922	745	P01889|1B07_HUMAN	87.35	22	0	7	0	8	6	9							5	0	0	1	0	3	2	2	Carbamidomethylation; Acetylation (Protein N-term); Phosphorylation (STY)	40460	HLA class I histocompatibility antigen B-7 alpha chain OS=Homo sapiens OX=9606 GN=HLA-B PE=1 SV=3
922	748	Q31610|1B81_HUMAN	87.35	22	0	7	0	8	6	9							5	0	0	1	0	3	2	2	Carbamidomethylation; Acetylation (Protein N-term); Phosphorylation (STY)	40400	HLA class I histocompatibility antigen B-81 alpha chain OS=Homo sapiens OX=9606 GN=HLA-B PE=1 SV=1
922	751	P30479|1B41_HUMAN	87.35	22	0	7	0	8	6	9							5	0	0	1	0	3	2	2	Carbamidomethylation; Acetylation (Protein N-term); Phosphorylation (STY)	40539	HLA class I histocompatibility antigen B-41 alpha chain OS=Homo sapiens OX=9606 GN=HLA-B PE=1 SV=1
922	761	P30480|1B42_HUMAN	87.35	22	0	7	0	8	6	9							5	0	0	1	0	3	2	2	Carbamidomethylation; Acetylation (Protein N-term); Phosphorylation (STY)	40333	HLA class I histocompatibility antigen B-42 alpha chain OS=Homo sapiens OX=9606 GN=HLA-B PE=1 SV=1
922	768	P30460|1B08_HUMAN	87.35	22	0	7	0	8	6	9							5	0	0	1	0	3	2	2	Carbamidomethylation; Acetylation (Protein N-term); Phosphorylation (STY)	40331	HLA class I histocompatibility antigen B-8 alpha chain OS=Homo sapiens OX=9606 GN=HLA-B PE=1 SV=1
1116	810	P19971|TYPH_HUMAN	87.35	12	0	0	0	12	7	7				306	0	0	3	3	0	0	0	3	1	1	Oxidation (M); Acetylation (Protein N-term); Phosphorylation (STY)	49956	Thymidine phosphorylase OS=Homo sapiens OX=9606 GN=TYMP PE=1 SV=2
761	769	O95466|FMNL1_HUMAN	87.07	4	2	2	4	1	4	4	304	462	531	37.9	1420	695	4	4	2	2	3	1	7	7	Phosphorylation (STY)	121853	Formin-like protein 1 OS=Homo sapiens OX=9606 GN=FMNL1 PE=1 SV=3
701	1198	Q9UHY1|NRBP_HUMAN	86.73	5	2	2	2	2	5	5	0	43.2	105	103	417	526	3	3	1	4	2	2	3	4	Acetylation (Protein N-term); Phosphorylation (STY)	59845	Nuclear receptor-binding protein OS=Homo sapiens OX=9606 GN=NRBP1 PE=1 SV=1
832	1918	Q9UNZ2|NSF1C_HUMAN	86.59	14	3	3	5	4	11	4	17.4	76.8	32.6	0	98.8	191	4	4	1	2	2	1	2	2	Acetylation (Protein N-term); Phosphorylation (STY)	40573	NSFL1 cofactor p47 OS=Homo sapiens OX=9606 GN=NSFL1C PE=1 SV=2
1007	1144	Q9NZT1|CALL5_HUMAN	86.48	25	16	16	16	10	0	0	0	17.5	0	80.9			2	2	1	2	1	2	0	0	Acetylation (Protein N-term); Phosphorylation (STY)	15893	Calmodulin-like protein 5 OS=Homo sapiens OX=9606 GN=CALML5 PE=1 SV=2
1065	1062	Q93008|USP9X_HUMAN	86.39	2	0	0	1	0	0	2			166			297	3	3	0	0	1	0	0	4	Carbamidomethylation; Phosphorylation (STY)	292278	Probable ubiquitin carboxyl-terminal hydrolase FAF-X OS=Homo sapiens OX=9606 GN=USP9X PE=1 SV=3
1085	1326	P53999|TCP4_HUMAN	86.23	24	0	0	0	9	14	15				24.9	14.7	404	3	3	0	0	0	2	1	4	Phosphorylation (STY)	14395	Activated RNA polymerase II transcriptional coactivator p15 OS=Homo sapiens OX=9606 GN=SUB1 PE=1 SV=3
1190	1210	Q00013|EM55_HUMAN	86.11	9	0	0	0	0	0	9						39.9	2	2	0	0	0	0	0	3	Phosphorylation (STY)	52297	55 kDa erythrocyte membrane protein OS=Homo sapiens OX=9606 GN=MPP1 PE=1 SV=2
619	953	P50552|VASP_HUMAN	86.09	22	7	7	16	18	11	7	0	25.8	0	117	124	70.7	4	4	2	2	4	8	6	6	Carbamidomethylation; Oxidation (M); Acetylation (Protein N-term); Phosphorylation (STY)	39830	Vasodilator-stimulated phosphoprotein OS=Homo sapiens OX=9606 GN=VASP PE=1 SV=3
1149	1118	Q12888|TP53B_HUMAN	85.88	3	0	1	1	0	1	2		33.6	0	0	32.1	88.6	4	4	0	1	1	1	1	2	Carbamidomethylation; Acetylation (Protein N-term); Phosphorylation (STY)	213573	TP53-binding protein 1 OS=Homo sapiens OX=9606 GN=TP53BP1 PE=1 SV=2
548	833	Q9NS84|CHST7_HUMAN	85.81	14	10	6	6	11	6	10	1030	518	1290	1750	1680	1670	5	5	6	3	4	6	4	7	Carbamidomethylation; Oxidation (M); Phosphorylation (STY)	54266	Carbohydrate sulfotransferase 7 OS=Homo sapiens OX=9606 GN=CHST7 PE=1 SV=2
648	869	O95980|RECK_HUMAN	85.33	3	1	1	1	3	1	1	2460	900	454	1860	3040	1490	3	3	5	4	2	5	5	5	Carbamidomethylation; Phosphorylation (STY)	106457	Reversion-inducing cysteine-rich protein with Kazal motifs OS=Homo sapiens OX=9606 GN=RECK PE=1 SV=1
803	2463	Q9Y3E7|CHMP3_HUMAN	85.2	15	15	15	0	0	15	15	25.1	0			84.6	28.7	1	1	1	1	0	0	4	3	Oxidation (M); Phosphorylation (STY)	25073	Charged multivesicular body protein 3 OS=Homo sapiens OX=9606 GN=CHMP3 PE=1 SV=3
876	1124	Q7Z5K2|WAPL_HUMAN	85.05	3	0	0	3	0	3	3			94.4		386	280	2	2	0	0	4	0	4	4	Phosphorylation (STY)	132945	Wings apart-like protein homolog OS=Homo sapiens OX=9606 GN=WAPL PE=1 SV=1
869	870	Q96QH2|PRAM_HUMAN	84.87	6	0	0	0	0	4	4					103	206	3	3	0	0	0	0	4	4	Phosphorylation (STY)	73969	PML-RARA-regulated adapter molecule 1 OS=Homo sapiens OX=9606 GN=PRAM1 PE=1 SV=3
738	1197	O43491|E41L2_HUMAN	84.81	4	3	2	2	2	3	3	112	301	129	129	208	163	3	3	2	3	1	2	2	3	Acetylation (Protein N-term); Phosphorylation (STY)	112588	Band 4.1-like protein 2 OS=Homo sapiens OX=9606 GN=EPB41L2 PE=1 SV=1
1089	928	Q9UHG0|DCDC2_HUMAN	84.8	9	3	7	2	0	0	0	85.9	191	69.2				3	3	1	3	1	0	0	0	Phosphorylation (STY)	52834	Doublecortin domain-containing protein 2 OS=Homo sapiens OX=9606 GN=DCDC2 PE=1 SV=2
549	1175	O00299|CLIC1_HUMAN	84.77	17	17	12	12	17	12	17	1200	902	0	254	1560	1670	2	2	5	3	2	6	4	8	Phosphorylation (STY)	26923	Chloride intracellular channel protein 1 OS=Homo sapiens OX=9606 GN=CLIC1 PE=1 SV=4
1123	3285	P51178|PLCD1_HUMAN	84.73	4	4	0	4	4	4	4	76.2		39.8	252	263	0	2	2	1	0	1	1	1	1	Phosphorylation (STY)	85665	1-phosphatidylinositol 4 5-bisphosphate phosphodiesterase delta-1 OS=Homo sapiens OX=9606 GN=PLCD1 PE=1 SV=2
680	2167	P18075|BMP7_HUMAN	84.52	4	4	3	3	3	3	4	289	704	86.3	187	552	385	2	2	3	6	1	1	2	2	Carbamidomethylation; Oxidation (M); Phosphorylation (STY)	49313	Bone morphogenetic protein 7 OS=Homo sapiens OX=9606 GN=BMP7 PE=1 SV=1
707	1404	P0DP01|HV108_HUMAN	84.37	22	9	9	9	22	0	9				39.2			2	1	2	4	2	6	0	2	Carbamidomethylation; Phosphorylation (STY)	12992	Immunoglobulin heavy variable 1-8 OS=Homo sapiens OX=9606 GN=IGHV1-8 PE=3 SV=1
337	3058	P25788|PSA3_HUMAN	84.29	5	5	5	5	5	5	5	767	2990	715	1590	1260	4680	1	1	5	14	3	9	4	16	Oxidation (M); Phosphorylation (STY)	28433	Proteasome subunit alpha type-3 OS=Homo sapiens OX=9606 GN=PSMA3 PE=1 SV=2
878	786	Q92539|LPIN2_HUMAN	84.23	8	2	3	0	4	2	5	78.1	135		227	124	840	5	5	1	2	0	2	1	5	Acetylation (Protein N-term); Phosphorylation (STY)	99399	Phosphatidate phosphatase LPIN2 OS=Homo sapiens OX=9606 GN=LPIN2 PE=1 SV=1
581	1555	Q9Y2J0|RP3A_HUMAN	84.13	3	3	3	2	2	3	3	1450	13900	612	528	621	20400	2	2	4	10	1	2	3	12	Phosphorylation (STY)	76872	Rabphilin-3A OS=Homo sapiens OX=9606 GN=RPH3A PE=1 SV=1
786	1256	Q00839|HNRPU_HUMAN	83.85	5	0	0	5	0	5	5			269		738	849	3	3	0	0	2	0	6	7	Carbamidomethylation; Acetylation (Protein N-term); Phosphorylation (STY)	90585	Heterogeneous nuclear ribonucleoprotein U OS=Homo sapiens OX=9606 GN=HNRNPU PE=1 SV=6
843	2007	O95841|ANGL1_HUMAN	83.81	3	3	3	3	3	3	3	0	0	0	84.5	108	87.7	3	3	2	1	1	1	3	2	Phosphorylation (STY)	56720	Angiopoietin-related protein 1 OS=Homo sapiens OX=9606 GN=ANGPTL1 PE=2 SV=1
889	3127	Q8WYJ6|SEPT1_HUMAN	83.43	6	0	0	6	6	6	6			850	0	1040	27.1	1	1	0	0	2	1	5	1	Carbamidomethylation; Phosphorylation (STY)	41971	Septin-1 OS=Homo sapiens OX=9606 GN=SEPTIN1 PE=1 SV=2
900	3279	O00505|IMA4_HUMAN	83.41	4	0	0	3	3	4	4			48.6	1470	176	695	2	2	0	0	1	2	2	4	Phosphorylation (STY)	57811	Importin subunit alpha-4 OS=Homo sapiens OX=9606 GN=KPNA3 PE=1 SV=2
686	886	Q15052|ARHG6_HUMAN	83.39	4	1	1	2	1	2	4	0	0	132	0	472	674	3	3	2	1	5	1	4	5	Oxidation (M); Phosphorylation (STY)	87499	Rho guanine nucleotide exchange factor 6 OS=Homo sapiens OX=9606 GN=ARHGEF6 PE=1 SV=2
607	864	Q13177|PAK2_HUMAN	83	16	4	2	2	11	2	11	282	102	292	433	645	744	6	5	3	2	2	5	3	6	Acetylation (Protein N-term); Phosphorylation (STY)	58043	Serine/threonine-protein kinase PAK 2 OS=Homo sapiens OX=9606 GN=PAK2 PE=1 SV=3
416	1910	P05386|RLA1_HUMAN	82.79	38	15	15	15	15	38	15	778	248	597	224	1780	1730	2	2	6	2	7	3	8	8	Carbamidomethylation; Oxidation (M); Acetylation (Protein N-term); Phosphorylation (STY)	11514	60S acidic ribosomal protein P1 OS=Homo sapiens OX=9606 GN=RPLP1 PE=1 SV=1
416	3126	P05387|RLA2_HUMAN	82.79	15	15	15	15	15	15	15	778	248	597	224	1780	1730	1	1	6	2	7	3	7	8	Oxidation (M); Phosphorylation (STY)	11665	60S acidic ribosomal protein P2 OS=Homo sapiens OX=9606 GN=RPLP2 PE=1 SV=1
485	1217	P04792|HSPB1_HUMAN	82.73	21	13	5	5	13	5	5	526	411	438	581	780	1450	3	3	4	3	3	4	6	7	Phosphorylation (STY)	22783	Heat shock protein beta-1 OS=Homo sapiens OX=9606 GN=HSPB1 PE=1 SV=2
555	884	P01706|LV211_HUMAN	82.33	45	7	38	7	13	7	38		0		50		0	3	2	1	4	2	12	2	3	Carbamidomethylation; Phosphorylation (STY)	12644	Immunoglobulin lambda variable 2-11 OS=Homo sapiens OX=9606 GN=IGLV2-11 PE=1 SV=2
692	1233	Q92752|TENR_HUMAN	82.22	10	3	1	3	4	3	1	240	181	950	282	731	430	5	5	3	2	3	2	5	2	Carbamidomethylation; Acetylation (Protein N-term); Phosphorylation (STY)	149561	Tenascin-R OS=Homo sapiens OX=9606 GN=TNR PE=1 SV=3
544	1928	P08575|PTPRC_HUMAN	82.21	1	1	1	1	1	1	1	295	277	500	862	1110	1260	2	2	2	1	6	4	7	7	Phosphorylation (STY)	147486	Receptor-type tyrosine-protein phosphatase C OS=Homo sapiens OX=9606 GN=PTPRC PE=1 SV=3
1043	753	Q5T200|ZC3HD_HUMAN	81.78	4	0	1	1	0	3	2		114	0		280	354	5	5	0	1	2	0	5	4	Phosphorylation (STY)	196635	Zinc finger CCCH domain-containing protein 13 OS=Homo sapiens OX=9606 GN=ZC3H13 PE=1 SV=1
499	3284	Q9NRB3|CHSTC_HUMAN	81.59	6	6	6	6	4	6	6	622	202	326	120	445	557	2	2	8	6	5	6	4	6	Phosphorylation (STY)	48415	Carbohydrate sulfotransferase 12 OS=Homo sapiens OX=9606 GN=CHST12 PE=2 SV=2
1045	998	P08581|MET_HUMAN	81.48	8	0	1	3	5	0	0		0	0	35.2			5	5	0	1	1	7	0	0	Carbamidomethylation; Oxidation (M); Acetylation (Protein N-term); Phosphorylation (STY)	155541	Hepatocyte growth factor receptor OS=Homo sapiens OX=9606 GN=MET PE=1 SV=4
1556	1603	P38606|VATA_HUMAN	81.06	10	0	0	0	3	7	0				72.7	0		2	2	0	0	0	1	1	0	Carbamidomethylation; Phosphorylation (STY)	68304	V-type proton ATPase catalytic subunit A OS=Homo sapiens OX=9606 GN=ATP6V1A PE=1 SV=2
1056	765	Q9Y6R7|FCGBP_HUMAN	80.94	3	0	0	1	0	0	1			273	0	66.9	299	7	7	0	0	3	1	1	5	Carbamidomethylation; Acetylation (Protein N-term); Phosphorylation (STY)	572021	IgGFc-binding protein OS=Homo sapiens OX=9606 GN=FCGBP PE=1 SV=3
819	712	P46821|MAP1B_HUMAN	80.9	7	3	3	3	2	1	2	106	83.8	3590	586	3250	5190	11	11	6	4	9	3	5	12	Carbamidomethylation; Acetylation (Protein N-term); Phosphorylation (STY)	270632	Microtubule-associated protein 1B OS=Homo sapiens OX=9606 GN=MAP1B PE=1 SV=2
1074	1024	Q99435|NELL2_HUMAN	80.88	11	0	0	0	6	0	5				161		0	4	4	0	0	0	5	0	1	Carbamidomethylation; Acetylation (Protein N-term); Phosphorylation (STY)	91347	Protein kinase C-binding protein NELL2 OS=Homo sapiens OX=9606 GN=NELL2 PE=1 SV=1
502	2976	Q8NHW5|RLA0L_HUMAN	80.79	6	6	6	6	6	6	6	465	171	482	229	1470	1710	1	1	4	3	5	2	4	6	Oxidation (M); Phosphorylation (STY)	34364	60S acidic ribosomal protein P0-like OS=Homo sapiens OX=9606 GN=RPLP0P6 PE=5 SV=1
502	3263	P05388|RLA0_HUMAN	80.79	6	6	6	6	6	6	6	465	171	482	229	1470	1710	1	1	4	3	5	2	4	6	Oxidation (M); Phosphorylation (STY)	34274	60S acidic ribosomal protein P0 OS=Homo sapiens OX=9606 GN=RPLP0 PE=1 SV=1
978	851	Q6PKG0|LARP1_HUMAN	80.75	11	0	0	1	0	2	8			108		50.9	64.4	5	5	0	0	1	0	4	3	Carbamidomethylation; Phosphorylation (STY)	123510	La-related protein 1 OS=Homo sapiens OX=9606 GN=LARP1 PE=1 SV=2
1057	963	Q92804|RBP56_HUMAN	80.75	8	4	0	0	4	0	0	1410			147			3	3	1	0	0	4	0	0	Phosphorylation (STY)	61830	TATA-binding protein-associated factor 2N OS=Homo sapiens OX=9606 GN=TAF15 PE=1 SV=1
1323	1178	Q99941|ATF6B_HUMAN	80.7	8	0	0	0	3	0	5				488		0	3	3	0	0	0	2	0	1	Carbamidomethylation; Acetylation (Protein N-term); Phosphorylation (STY)	76709	Cyclic AMP-dependent transcription factor ATF-6 beta OS=Homo sapiens OX=9606 GN=ATF6B PE=1 SV=2
844	1005	Q9P2E5|CHPF2_HUMAN	80.29	6	2	2	2	3	6	3	243	0	159	340	312	810	4	4	1	1	2	2	2	2	Acetylation (Protein N-term); Phosphorylation (STY)	85948	Chondroitin sulfate glucuronyltransferase OS=Homo sapiens OX=9606 GN=CHPF2 PE=2 SV=2
868	2530	Q9NPQ8|RIC8A_HUMAN	80.07	5	0	5	0	5	5	5		106		140	36.3	1800	1	1	0	2	0	1	3	10	Oxidation (M); Phosphorylation (STY)	59710	Synembryn-A OS=Homo sapiens OX=9606 GN=RIC8A PE=1 SV=3
678	2317	Q9H3Z4|DNJC5_HUMAN	79.9	27	9	9	10	9	9	26	523	202	694	352	705	789	3	3	3	1	3	2	3	4	Phosphorylation (STY)	22149	DnaJ homolog subfamily C member 5 OS=Homo sapiens OX=9606 GN=DNAJC5 PE=1 SV=1
1091	1229	Q13200|PSMD2_HUMAN	79.41	4	0	0	0	0	3	4					0	35.4	2	2	0	0	0	0	1	4	Phosphorylation (STY)	100200	26S proteasome non-ATPase regulatory subunit 2 OS=Homo sapiens OX=9606 GN=PSMD2 PE=1 SV=3
1396	1429	P16989|YBOX3_HUMAN	79.31	12	0	0	6	0	0	12			0			57.9	3	3	0	0	1	0	0	3	Phosphorylation (STY)	40090	Y-box-binding protein 3 OS=Homo sapiens OX=9606 GN=YBX3 PE=1 SV=4
1081	776	P30461|1B13_HUMAN	79.27	22	0	7	0	8	6	6				0			5	1	0	1	0	2	2	1	Carbamidomethylation; Acetylation (Protein N-term); Phosphorylation (STY)	40474	HLA class I histocompatibility antigen B-13 alpha chain OS=Homo sapiens OX=9606 GN=HLA-B PE=1 SV=1
798	2109	Q68BL8|OLM2B_HUMAN	79.24	4	4	4	0	4	4	4	38.5	72.4		309	358	160	1	1	1	1	0	2	4	1	Phosphorylation (STY)	83999	Olfactomedin-like protein 2B OS=Homo sapiens OX=9606 GN=OLFML2B PE=2 SV=2
873	1203	Q13283|G3BP1_HUMAN	78.95	10	4	4	10	4	4	4	242	91.5	593	506	600	1390	2	2	1	1	2	1	1	2	Acetylation (Protein N-term); Phosphorylation (STY)	52164	Ras GTPase-activating protein-binding protein 1 OS=Homo sapiens OX=9606 GN=G3BP1 PE=1 SV=1
983	1255	P17812|PYRG1_HUMAN	78.94	6	1	5	0	2	2	6	0	138		98.6	37.1	2110	4	4	1	4	0	1	1	6	Carbamidomethylation; Phosphorylation (STY)	66690	CTP synthase 1 OS=Homo sapiens OX=9606 GN=CTPS1 PE=1 SV=2
1152	1116	Q8WUM4|PDC6I_HUMAN	78.89	11	0	0	7	2	2	4			23.6	0	80.9	272	3	3	0	0	1	2	1	2	Carbamidomethylation; Oxidation (M); Phosphorylation (STY)	96023	Programmed cell death 6-interacting protein OS=Homo sapiens OX=9606 GN=PDCD6IP PE=1 SV=1
698	1206	Q14696|MESD_HUMAN	78.12	26	6	15	6	9	23	6	30.9	1410	0	228	2600	112	4	4	4	2	1	2	6	1	Phosphorylation (STY)	26077	LRP chaperone MESD OS=Homo sapiens OX=9606 GN=MESD PE=1 SV=2
1101	3145	Q12982|BNIP2_HUMAN	78.12	4	0	0	0	0	4	4					314	123	2	2	0	0	0	0	6	2	Phosphorylation (STY)	36018	BCL2/adenovirus E1B 19 kDa protein-interacting protein 2 OS=Homo sapiens OX=9606 GN=BNIP2 PE=1 SV=1
940	1489	Q9Y3Z3|SAMH1_HUMAN	77.89	6	0	0	0	5	5	6				33	738	88.5	2	2	0	0	0	2	4	3	Carbamidomethylation; Acetylation (Protein N-term); Phosphorylation (STY)	72201	Deoxynucleoside triphosphate triphosphohydrolase SAMHD1 OS=Homo sapiens OX=9606 GN=SAMHD1 PE=1 SV=2
1008	1244	P51991|ROA3_HUMAN	77.88	16	0	0	0	8	12	8				109	317	165	4	3	0	0	0	3	2	2	Oxidation (M); Phosphorylation (STY)	39595	Heterogeneous nuclear ribonucleoprotein A3 OS=Homo sapiens OX=9606 GN=HNRNPA3 PE=1 SV=2
643	1370	P14317|HCLS1_HUMAN	77.73	14	5	7	0	5	8	10	0	64.2		111	0	298	4	4	2	5	0	2	3	6	Carbamidomethylation; Oxidation (M); Acetylation (Protein N-term); Phosphorylation (STY)	54014	Hematopoietic lineage cell-specific protein OS=Homo sapiens OX=9606 GN=HCLS1 PE=1 SV=3
1289	1187	O76003|GLRX3_HUMAN	77.65	11	0	0	0	11	8	4				13	0	195	2	2	0	0	0	2	1	2	Acetylation (Protein N-term); Phosphorylation (STY)	37432	Glutaredoxin-3 OS=Homo sapiens OX=9606 GN=GLRX3 PE=1 SV=2
906	1045	P08133|ANXA6_HUMAN	77.55	10	4	2	0	4	4	2	0	46.7		4550	1010	1260	4	4	1	1	0	7	4	2	Acetylation (Protein N-term); Phosphorylation (STY)	75873	Annexin A6 OS=Homo sapiens OX=9606 GN=ANXA6 PE=1 SV=3
1071	676	Q86TH1|ATL2_HUMAN	77.13	13	7	0	0	3	5	0	0			270	0		6	6	2	0	0	5	1	0	Carbamidomethylation; Acetylation (Protein N-term); Phosphorylation (STY)	104621	ADAMTS-like protein 2 OS=Homo sapiens OX=9606 GN=ADAMTSL2 PE=1 SV=1
1609	2186	P01593|KVD33_HUMAN	77.09	30	0	0	16	14	0	0				397			2	1	0	0	1	1	0	0	Carbamidomethylation; Acetylation (Protein N-term); Phosphorylation (STY)	12848	Immunoglobulin kappa variable 1D-33 OS=Homo sapiens OX=9606 GN=IGKV1D-33 PE=1 SV=2
1609	2187	P01594|KV133_HUMAN	77.09	30	0	0	16	14	0	0				397			2	1	0	0	1	1	0	0	Carbamidomethylation; Acetylation (Protein N-term); Phosphorylation (STY)	12848	Immunoglobulin kappa variable 1-33 OS=Homo sapiens OX=9606 GN=IGKV1-33 PE=1 SV=2
1075	1016	Q14112|NID2_HUMAN	77.06	4	1	1	2	1	0	0	92.9	0	438	0			4	4	2	2	1	1	0	0	Carbamidomethylation; Acetylation (Protein N-term); Phosphorylation (STY)	151254	Nidogen-2 OS=Homo sapiens OX=9606 GN=NID2 PE=1 SV=3
702	2189	Q71H61|ILDR2_HUMAN	77.01	3	3	3	3	3	3	3	0	67.9	90.8	368	245	382	1	1	3	5	1	4	2	3	Phosphorylation (STY)	71200	Immunoglobulin-like domain-containing receptor 2 OS=Homo sapiens OX=9606 GN=ILDR2 PE=2 SV=1
409	1106	Q68EM7|RHG17_HUMAN	76.73	7	3	3	4	3	3	7	43.3	0	651	603	582	2020	3	3	4	2	8	8	5	8	Phosphorylation (STY)	95437	Rho GTPase-activating protein 17 OS=Homo sapiens OX=9606 GN=ARHGAP17 PE=1 SV=1
907	1410	Q5VSL9|STRP1_HUMAN	76.64	4	0	0	1	1	2	2			0	0	125	244	3	3	0	0	1	1	1	5	Acetylation (Protein N-term); Phosphorylation (STY)	95576	Striatin-interacting protein 1 OS=Homo sapiens OX=9606 GN=STRIP1 PE=1 SV=1
1298	2201	P01597|KV139_HUMAN	76.44	30	0	0	16	14	0	0				885			2	1	0	0	1	2	0	0	Carbamidomethylation; Acetylation (Protein N-term); Phosphorylation (STY)	12737	Immunoglobulin kappa variable 1-39 OS=Homo sapiens OX=9606 GN=IGKV1-39 PE=1 SV=2
1298	2202	P04432|KVD39_HUMAN	76.44	30	0	0	16	14	0	0				885			2	1	0	0	1	2	0	0	Carbamidomethylation; Acetylation (Protein N-term); Phosphorylation (STY)	12737	Immunoglobulin kappa variable 1D-39 OS=Homo sapiens OX=9606 GN=IGKV1D-39 PE=3 SV=2
1298	2525	A0A0C4DH72|KV106_HUMAN	76.44	30	0	0	16	14	0	16			21.3	885		0	2	2	0	0	1	2	0	1	Carbamidomethylation; Oxidation (M); Acetylation (Protein N-term); Phosphorylation (STY)	12697	Immunoglobulin kappa variable 1-6 OS=Homo sapiens OX=9606 GN=IGKV1-6 PE=3 SV=1
567	1549	Q9UQM7|KCC2A_HUMAN	76.29	9	3	3	3	7	3	5	191	119	154	134	267	248	3	3	2	6	3	3	3	3	Carbamidomethylation; Oxidation (M); Acetylation (Protein N-term); Phosphorylation (STY)	54088	Calcium/calmodulin-dependent protein kinase type II subunit alpha OS=Homo sapiens OX=9606 GN=CAMK2A PE=1 SV=2
1172	1512	Q9NQ84|GPC5C_HUMAN	76.14	5	5	5	0	0	2	3	102	137			0	72.5	2	2	2	2	0	0	4	1	Phosphorylation (STY)	48193	G-protein coupled receptor family C group 5 member C OS=Homo sapiens OX=9606 GN=GPRC5C PE=1 SV=2
1009	1736	Q96C19|EFHD2_HUMAN	76.1	12	0	0	7	5	5	7			28.1	0	0	53.7	2	2	0	0	3	3	1	1	Phosphorylation (STY)	26697	EF-hand domain-containing protein D2 OS=Homo sapiens OX=9606 GN=EFHD2 PE=1 SV=1
1077	1745	Q9NXG2|THUM1_HUMAN	75.6	13	0	0	0	6	7	6				357	362	353	4	4	0	0	0	1	3	3	Carbamidomethylation; Acetylation (Protein N-term); Phosphorylation (STY)	39315	THUMP domain-containing protein 1 OS=Homo sapiens OX=9606 GN=THUMPD1 PE=1 SV=2
1305	1269	Q96RU3|FNBP1_HUMAN	75.54	7	0	0	3	6	2	3			188	131	445	281	3	3	0	0	2	2	2	2	Carbamidomethylation; Phosphorylation (STY)	71307	Formin-binding protein 1 OS=Homo sapiens OX=9606 GN=FNBP1 PE=1 SV=2
627	1590	O94923|GLCE_HUMAN	75.51	4	2	2	2	2	4	2	1910	1000	1570	1610	2460	2280	2	2	3	3	2	2	3	3	Phosphorylation (STY)	70101	D-glucuronyl C5-epimerase OS=Homo sapiens OX=9606 GN=GLCE PE=1 SV=3
1169	2797	P11166|GTR1_HUMAN	75.31	5	0	5	0	0	0	5		47.5				1490	2	2	0	2	0	0	0	3	Phosphorylation (STY)	54084	Solute carrier family 2 facilitated glucose transporter member 1 OS=Homo sapiens OX=9606 GN=SLC2A1 PE=1 SV=2
905	924	Q9NTI5|PDS5B_HUMAN	75.14	5	1	0	1	2	3	1	0		138	922	315	262	5	5	1	0	4	2	3	1	Carbamidomethylation; Phosphorylation (STY)	164666	Sister chromatid cohesion protein PDS5 homolog B OS=Homo sapiens OX=9606 GN=PDS5B PE=1 SV=1
571	1701	Q8NHG7|SVIP_HUMAN	74.9	40	40	40	40	40	40	40	310	352	169	401	319	551	2	2	4	5	2	6	4	5	Carbamidomethylation; Phosphorylation (STY)	8443	Small VCP/p97-interacting protein OS=Homo sapiens OX=9606 GN=SVIP PE=1 SV=1
1244	3049	Q13421|MSLN_HUMAN	74.7	2	0	0	2	0	2	2			145		174	292	1	1	0	0	1	0	1	1	Phosphorylation (STY)	68986	Mesothelin OS=Homo sapiens OX=9606 GN=MSLN PE=1 SV=2
718	1069	Q6P995|F171B_HUMAN	74.57	18	5	6	7	2	4	7	170	377	287	0	272	414	9	9	3	4	6	1	4	4	Carbamidomethylation; Acetylation (Protein N-term); Phosphorylation (STY)	92181	Protein FAM171B OS=Homo sapiens OX=9606 GN=FAM171B PE=2 SV=3
1072	873	A0A0J9YXX1|HV5X1_HUMAN	74.38	32	6	0	21	26	0	6	0			0		0	4	2	1	0	1	7	0	2	Carbamidomethylation; Phosphorylation (STY)	12773	Immunoglobulin heavy variable 5-10-1 OS=Homo sapiens OX=9606 GN=IGHV5-10-1 PE=3 SV=1
1334	1153	Q9HB40|RISC_HUMAN	74.31	13	5	0	0	8	0	0	119			0			3	3	1	0	0	2	0	0	Carbamidomethylation; Phosphorylation (STY)	50831	Retinoid-inducible serine carboxypeptidase OS=Homo sapiens OX=9606 GN=SCPEP1 PE=1 SV=1
1047	733	O43426|SYNJ1_HUMAN	74.23	4	0	1	0	1	0	4		119		4400		693	5	5	0	1	0	1	0	5	Carbamidomethylation; Oxidation (M); Acetylation (Protein N-term); Phosphorylation (STY)	173102	Synaptojanin-1 OS=Homo sapiens OX=9606 GN=SYNJ1 PE=1 SV=2
773	1096	Q96SM3|CPXM1_HUMAN	74.21	6	2	2	2	4	2	4	0	0	0	261	0	86.7	3	3	1	3	1	4	1	2	Carbamidomethylation; Acetylation (Protein N-term); Phosphorylation (STY)	81668	Probable carboxypeptidase X1 OS=Homo sapiens OX=9606 GN=CPXM1 PE=2 SV=2
883	1162	Q9BYC5|FUT8_HUMAN	73.73	6	5	5	2	2	6	2	124	83.7	155	187	1100	0	3	3	3	2	1	2	3	1	Acetylation (Protein N-term); Phosphorylation (STY)	66516	Alpha-(1 6)-fucosyltransferase OS=Homo sapiens OX=9606 GN=FUT8 PE=1 SV=2
641	1492	Q9H6X2|ANTR1_HUMAN	73.5	7	4	4	4	4	4	7	3110	1330	3160	766	2050	2740	3	3	13	10	11	10	9	14	Acetylation (Protein N-term); Phosphorylation (STY)	62789	Anthrax toxin receptor 1 OS=Homo sapiens OX=9606 GN=ANTXR1 PE=1 SV=2
1069	926	Q13153|PAK1_HUMAN	73.45	12	7	0	0	12	7	7	84.4			396	0	1680	3	2	1	0	0	7	1	2	Phosphorylation (STY)	60647	Serine/threonine-protein kinase PAK 1 OS=Homo sapiens OX=9606 GN=PAK1 PE=1 SV=2
711	1668	Q8NBJ5|GT251_HUMAN	73.45	6	3	6	3	3	3	3	140	103	386	0	225	284	2	2	2	2	2	3	1	3	Carbamidomethylation; Acetylation (Protein N-term); Phosphorylation (STY)	71636	Procollagen galactosyltransferase 1 OS=Homo sapiens OX=9606 GN=COLGALT1 PE=1 SV=1
600	1345	O00300|TR11B_HUMAN	73.29	6	6	6	6	6	6	6	699	255	490	555	648	2120	2	2	5	5	3	3	4	6	Phosphorylation (STY)	46026	Tumor necrosis factor receptor superfamily member 11B OS=Homo sapiens OX=9606 GN=TNFRSF11B PE=1 SV=3
975	1021	O95352|ATG7_HUMAN	72.99	11	0	0	0	8	6	5				1370	443	19.2	4	4	0	0	0	5	4	2	Carbamidomethylation; Oxidation (M); Acetylation (Protein N-term); Phosphorylation (STY)	77960	Ubiquitin-like modifier-activating enzyme ATG7 OS=Homo sapiens OX=9606 GN=ATG7 PE=1 SV=1
1179	754	P08174|DAF_HUMAN	72.98	18	5	0	0	13	0	0	30.6			1660			5	5	1	0	0	7	0	0	Carbamidomethylation; Phosphorylation (STY)	41400	Complement decay-accelerating factor OS=Homo sapiens OX=9606 GN=CD55 PE=1 SV=4
979	856	Q9UI08|EVL_HUMAN	72.9	15	0	3	8	6	9	12		0	241	56.2	119	272	4	4	0	1	2	3	2	5	Phosphorylation (STY)	44620	Ena/VASP-like protein OS=Homo sapiens OX=9606 GN=EVL PE=1 SV=2
772	1059	A0A075B6K4|LV310_HUMAN	72.57	47	0	9	16	16	7	38			238	2150	226	460	3	2	0	1	2	5	1	4	Carbamidomethylation; Oxidation (M); Phosphorylation (STY)	12441	Immunoglobulin lambda variable 3-10 OS=Homo sapiens OX=9606 GN=IGLV3-10 PE=3 SV=2
1140	1202	P51610|HCFC1_HUMAN	72.54	6	0	1	1	0	5	1		879	10.6	120	58.6	62.1	5	5	0	1	1	1	3	1	Carbamidomethylation; Oxidation (M); Acetylation (Protein N-term); Phosphorylation (STY)	208730	Host cell factor 1 OS=Homo sapiens OX=9606 GN=HCFC1 PE=1 SV=2
670	959	Q9BZQ8|NIBA1_HUMAN	72.45	7	0	0	3	5	0	2			46.7	3870		255	4	4	0	0	3	18	0	1	Carbamidomethylation; Oxidation (M); Acetylation (Protein N-term); Phosphorylation (STY)	103135	Protein Niban 1 OS=Homo sapiens OX=9606 GN=NIBAN1 PE=1 SV=1
1073	764	Q9Y4G8|RPGF2_HUMAN	72.44	5	1	0	0	2	0	3	72.8			0		428	5	4	1	0	0	2	0	5	Carbamidomethylation; Acetylation (Protein N-term); Phosphorylation (STY)	167416	Rap guanine nucleotide exchange factor 2 OS=Homo sapiens OX=9606 GN=RAPGEF2 PE=1 SV=1
908	1067	Q15375|EPHA7_HUMAN	72.3	13	10	2	2	2	2	3	135	0	53	0	0	78.9	6	5	3	1	1	1	1	4	Carbamidomethylation; Acetylation (Protein N-term); Phosphorylation (STY)	112097	Ephrin type-A receptor 7 OS=Homo sapiens OX=9606 GN=EPHA7 PE=1 SV=3
1160	962	Q9UHB6|LIMA1_HUMAN	72.06	6	0	0	0	3	2	3				2340	39.6	1120	4	4	0	0	0	2	1	3	Phosphorylation (STY)	85226	LIM domain and actin-binding protein 1 OS=Homo sapiens OX=9606 GN=LIMA1 PE=1 SV=1
934	1724	Q13976|KGP1_HUMAN	71.97	5	3	3	3	3	5	3	85.8	70.4	53.8	128	102	104	2	2	1	1	1	1	2	1	Carbamidomethylation; Phosphorylation (STY)	76364	cGMP-dependent protein kinase 1 OS=Homo sapiens OX=9606 GN=PRKG1 PE=1 SV=3
1142	960	Q8TDR0|MIPT3_HUMAN	71.92	8	5	7	4	1	0	0	1020	234	0	305			4	4	2	4	2	1	0	0	Oxidation (M); Acetylation (Protein N-term); Phosphorylation (STY)	78632	TRAF3-interacting protein 1 OS=Homo sapiens OX=9606 GN=TRAF3IP1 PE=1 SV=1
566	1594	Q9UQ80|PA2G4_HUMAN	71.73	11	5	5	5	5	7	8	1140	1390	524	566	2950	6080	3	3	3	3	1	2	3	9	Acetylation (Protein N-term); Phosphorylation (STY)	43787	Proliferation-associated protein 2G4 OS=Homo sapiens OX=9606 GN=PA2G4 PE=1 SV=3
1040	789	O75592|MYCB2_HUMAN	71.71	1	0	0	0	0	1	0	80.8	0	160	0	129	105	6	6	1	1	3	1	4	1	Carbamidomethylation; Acetylation (Protein N-term); Phosphorylation (STY)	513643	E3 ubiquitin-protein ligase MYCBP2 OS=Homo sapiens OX=9606 GN=MYCBP2 PE=1 SV=4
754	1749	Q13275|SEM3F_HUMAN	71.61	7	4	2	2	2	2	4	5430	34.4	28.3	23	63.4	1500	3	3	2	3	1	3	1	4	Carbamidomethylation; Phosphorylation (STY)	88381	Semaphorin-3F OS=Homo sapiens OX=9606 GN=SEMA3F PE=2 SV=2
886	2975	P83916|CBX1_HUMAN	71.54	9	0	0	0	9	9	9				0	0	168	2	2	0	0	0	2	1	6	Phosphorylation (STY)	21418	Chromobox protein homolog 1 OS=Homo sapiens OX=9606 GN=CBX1 PE=1 SV=1
1062	1070	Q5T4S7|UBR4_HUMAN	71.46	1	0	0	0	0	0	1					0	684	3	3	0	0	0	0	1	4	Phosphorylation (STY)	573849	E3 ubiquitin-protein ligase UBR4 OS=Homo sapiens OX=9606 GN=UBR4 PE=1 SV=1
935	2555	Q13547|HDAC1_HUMAN	71.41	7	0	0	7	7	7	7			135	69	346	296	1	1	0	0	2	1	4	4	Oxidation (M); Phosphorylation (STY)	55103	Histone deacetylase 1 OS=Homo sapiens OX=9606 GN=HDAC1 PE=1 SV=1
1159	609	O43719|HTSF1_HUMAN	71.31	19	0	0	5	4	7	6			0	88.6	334	567	7	7	0	0	1	1	5	4	Carbamidomethylation; Acetylation (Protein N-term); Phosphorylation (STY)	85853	HIV Tat-specific factor 1 OS=Homo sapiens OX=9606 GN=HTATSF1 PE=1 SV=1
817	3266	Q8IW45|NNRD_HUMAN	71.25	7	7	7	7	7	7	7	217	161	144	111	140	243	1	1	2	2	1	2	1	1	Carbamidomethylation; Phosphorylation (STY)	36576	ATP-dependent (S)-NAD(P)H-hydrate dehydratase OS=Homo sapiens OX=9606 GN=NAXD PE=1 SV=1
749	1420	Q9UKE5|TNIK_HUMAN	71.2	3	1	1	3	1	1	1	27.8	75.7	129	122	151	132	2	2	2	1	2	1	1	4	Carbamidomethylation; Oxidation (M); Acetylation (Protein N-term); Phosphorylation (STY)	154943	TRAF2 and NCK-interacting protein kinase OS=Homo sapiens OX=9606 GN=TNIK PE=1 SV=1
1055	1030	Q9Y5F7|PCDGL_HUMAN	71.15	6	2	4	2	1	0	3		261	115	822		173	4	3	3	3	1	1	0	3	Phosphorylation (STY)	101214	Protocadherin gamma-C4 OS=Homo sapiens OX=9606 GN=PCDHGC4 PE=2 SV=1
885	2332	O60763|USO1_HUMAN	71.13	3	3	3	3	3	3	3	114	0	78.8	31.1	228	314	1	1	2	1	2	1	1	1	Phosphorylation (STY)	107895	General vesicular transport factor p115 OS=Homo sapiens OX=9606 GN=USO1 PE=1 SV=2
716	2149	P51608|MECP2_HUMAN	70.95	7	4	7	4	4	4	4	0	30.3	185	0	1230	418	2	2	1	2	3	1	4	2	Phosphorylation (STY)	52441	Methyl-CpG-binding protein 2 OS=Homo sapiens OX=9606 GN=MECP2 PE=1 SV=1
791	1579	Q05193|DYN1_HUMAN	70.92	4	1	3	3	1	0	1	356	450	177	139		449	5	5	6	6	2	2	0	2	Acetylation (Protein N-term); Phosphorylation (STY)	97408	Dynamin-1 OS=Homo sapiens OX=9606 GN=DNM1 PE=1 SV=2
503	3143	Q16568|CART_HUMAN	70.76	13	13	13	13	13	13	13	562	456	0	803	540	895	1	1	4	3	3	2	5	7	Phosphorylation (STY)	12829	Cocaine- and amphetamine-regulated transcript protein OS=Homo sapiens OX=9606 GN=CARTPT PE=1 SV=1
879	1382	P20042|IF2B_HUMAN	70.49	11	0	11	0	0	4	11		47.4			203	666	2	2	0	4	0	0	4	6	Oxidation (M); Acetylation (Protein N-term); Phosphorylation (STY)	38388	Eukaryotic translation initiation factor 2 subunit 2 OS=Homo sapiens OX=9606 GN=EIF2S2 PE=1 SV=2
916	912	Q5T749|KPRP_HUMAN	70.31	5	4	2	4	5	4	2	212	641	2770	1760	708	128	3	3	3	1	4	9	2	2	Carbamidomethylation; Phosphorylation (STY)	64136	Keratinocyte proline-rich protein OS=Homo sapiens OX=9606 GN=KPRP PE=1 SV=1
1161	1658	P17858|PFKAL_HUMAN	70.27	8	0	3	0	8	3	0		0		0	79		2	2	0	1	0	2	2	0	Carbamidomethylation; Acetylation (Protein N-term); Phosphorylation (STY)	85018	ATP-dependent 6-phosphofructokinase liver type OS=Homo sapiens OX=9606 GN=PFKL PE=1 SV=6
958	2545	P29590|PML_HUMAN	70.22	2	0	0	1	1	2	2			74.8	183	247	427	2	2	0	0	1	1	2	3	Phosphorylation (STY)	97551	Protein PML OS=Homo sapiens OX=9606 GN=PML PE=1 SV=3
1143	976	Q8NI35|INADL_HUMAN	70.06	4	3	1	0	1	1	1	108	49.8		834	2550	0	6	6	6	1	0	2	1	1	Oxidation (M); Acetylation (Protein N-term); Phosphorylation (STY)	196367	InaD-like protein OS=Homo sapiens OX=9606 GN=PATJ PE=1 SV=3
842	993	Q8TDB6|DTX3L_HUMAN	69.95	5	0	0	2	1	4	4			0	63.3	60.3	172	3	3	0	0	1	1	2	5	Acetylation (Protein N-term); Phosphorylation (STY)	83554	E3 ubiquitin-protein ligase DTX3L OS=Homo sapiens OX=9606 GN=DTX3L PE=1 SV=1
1129	978	Q9HDC9|APMAP_HUMAN	69.82	12	0	0	0	9	0	3				193		98	3	3	0	0	0	4	0	1	Phosphorylation (STY)	46480	Adipocyte plasma membrane-associated protein OS=Homo sapiens OX=9606 GN=APMAP PE=1 SV=2
865	1937	Q13554|KCC2B_HUMAN	69.81	2	2	2	2	2	2	2	182	88.5	131	67.3	42.5	223	1	1	1	1	1	1	2	1	Phosphorylation (STY)	72678	Calcium/calmodulin-dependent protein kinase type II subunit beta OS=Homo sapiens OX=9606 GN=CAMK2B PE=1 SV=3
820	970	Q96ST2|IWS1_HUMAN	69.78	7	6	1	1	1	3	3	404	407	347	2270	441	315	3	3	4	2	5	4	6	4	Phosphorylation (STY)	91955	Protein IWS1 homolog OS=Homo sapiens OX=9606 GN=IWS1 PE=1 SV=2
777	1465	Q53EL6|PDCD4_HUMAN	69.63	4	2	0	4	2	4	4	0		405	128	829	1070	2	2	1	0	2	1	4	4	Phosphorylation (STY)	51735	Programmed cell death protein 4 OS=Homo sapiens OX=9606 GN=PDCD4 PE=1 SV=2
1068	879	Q6ZSZ5|ARHGI_HUMAN	69.39	4	0	1	0	1	2	2		0		0	206	160	4	4	0	1	0	1	3	2	Carbamidomethylation; Acetylation (Protein N-term); Phosphorylation (STY)	151642	Rho guanine nucleotide exchange factor 18 OS=Homo sapiens OX=9606 GN=ARHGEF18 PE=1 SV=4
846	2057	Q9BRK5|CAB45_HUMAN	69.3	4	4	4	4	4	4	4	389	307	0	0	381	520	1	1	1	1	2	1	1	2	Phosphorylation (STY)	41807	45 kDa calcium-binding protein OS=Homo sapiens OX=9606 GN=SDF4 PE=1 SV=1
1094	1312	Q7Z7L8|CK096_HUMAN	69.14	8	0	0	0	2	2	8				143	0	210	2	2	0	0	0	1	1	2	Phosphorylation (STY)	46114	Uncharacterized protein C11orf96 OS=Homo sapiens OX=9606 GN=C11orf96 PE=1 SV=3
1313	1591	A0A075B6I1|LV460_HUMAN	68.91	25	11	11	11	14	0	25	0	203	115	244		290	2	2	1	1	1	1	0	2	Oxidation (M); Acetylation (Protein N-term); Phosphorylation (STY)	12987	Immunoglobulin lambda variable 4-60 OS=Homo sapiens OX=9606 GN=IGLV4-60 PE=3 SV=1
1803	2875	Q96QR8|PURB_HUMAN	68.88	6	0	0	0	0	0	6						106	1	1	0	0	0	0	0	1	Phosphorylation (STY)	33241	Transcriptional activator protein Pur-beta OS=Homo sapiens OX=9606 GN=PURB PE=1 SV=3
863	1305	P08648|ITA5_HUMAN	68.8	6	2	0	2	2	2	6	0		328	172	466	796	3	3	1	0	1	2	1	5	Carbamidomethylation; Acetylation (Protein N-term); Phosphorylation (STY)	114536	Integrin alpha-5 OS=Homo sapiens OX=9606 GN=ITGA5 PE=1 SV=2
923	904	P04049|RAF1_HUMAN	68.6	7	1	0	1	1	5	7	0		19	37.1	106	180	4	4	1	0	2	1	3	8	Carbamidomethylation; Acetylation (Protein N-term); Phosphorylation (STY)	73052	RAF proto-oncogene serine/threonine-protein kinase OS=Homo sapiens OX=9606 GN=RAF1 PE=1 SV=1
1024	3131	Q9Y4F1|FARP1_HUMAN	68.56	2	2	2	2	2	0	2	0	35	26.6	0		51.2	1	1	1	3	1	1	0	1	Phosphorylation (STY)	118633	FERM ARHGEF and pleckstrin domain-containing protein 1 OS=Homo sapiens OX=9606 GN=FARP1 PE=1 SV=1
1051	1049	O76021|RL1D1_HUMAN	68.42	14	0	0	3	6	7	3			62.8	0	119	19.6	5	5	0	0	1	3	2	2	Acetylation (Protein N-term); Phosphorylation (STY)	54973	Ribosomal L1 domain-containing protein 1 OS=Homo sapiens OX=9606 GN=RSL1D1 PE=1 SV=3
855	2762	Q9H467|CUED2_HUMAN	68.4	4	4	4	4	4	4	4	174	156	93.3	78.8	264	402	1	1	1	2	1	2	2	2	Oxidation (M); Phosphorylation (STY)	32009	CUE domain-containing protein 2 OS=Homo sapiens OX=9606 GN=CUEDC2 PE=1 SV=1
862	945	Q14517|FAT1_HUMAN	68.35	2	1	1	1	1	1	1	50.1	46.8	84.7	1100	161	97.9	5	5	1	2	2	4	1	2	Acetylation (Protein N-term); Phosphorylation (STY)	506278	Protocadherin Fat 1 OS=Homo sapiens OX=9606 GN=FAT1 PE=1 SV=2
929	2292	O15530|PDPK1_HUMAN	68.34	5	3	0	3	3	3	5	50.5		78.8	32.8	111	0	2	2	1	0	2	1	1	2	Phosphorylation (STY)	63152	3-phosphoinositide-dependent protein kinase 1 OS=Homo sapiens OX=9606 GN=PDPK1 PE=1 SV=1
929	2484	Q6A1A2|PDPK2_HUMAN	68.34	5	5	0	5	5	5	5	50.5		78.8	32.8	111	0	1	1	1	0	2	1	1	1	Phosphorylation (STY)	44765	Putative 3-phosphoinositide-dependent protein kinase 2 OS=Homo sapiens OX=9606 GN=PDPK2P PE=5 SV=1
1254	1706	P61006|RAB8A_HUMAN	68.3	13	0	0	0	5	0	7				61.2		36.9	2	2	0	0	0	2	0	1	Phosphorylation (STY)	23668	Ras-related protein Rab-8A OS=Homo sapiens OX=9606 GN=RAB8A PE=1 SV=1
1137	1199	Q9GZR7|DDX24_HUMAN	68.15	14	2	4	4	3	5	5	0	4460	140	0	4170	6590	7	7	1	4	2	1	4	6	Carbamidomethylation; Oxidation (M); Acetylation (Protein N-term); Phosphorylation (STY)	96332	ATP-dependent RNA helicase DDX24 OS=Homo sapiens OX=9606 GN=DDX24 PE=1 SV=1
1034	933	Q04726|TLE3_HUMAN	68.1	22	5	6	5	12	11	5	77.4	0	76.2	54.5	290	0	11	11	2	3	2	4	5	3	Carbamidomethylation; Acetylation (Protein N-term); Phosphorylation (STY)	83417	Transducin-like enhancer protein 3 OS=Homo sapiens OX=9606 GN=TLE3 PE=1 SV=2
1679	2006	Q96EZ8|MCRS1_HUMAN	68.03	6	0	0	0	2	4	0				102	48		2	2	0	0	0	1	1	0	Acetylation (Protein N-term); Phosphorylation (STY)	51803	Microspherule protein 1 OS=Homo sapiens OX=9606 GN=MCRS1 PE=1 SV=1
1231	2134	P05019|IGF1_HUMAN	67.99	15	0	0	15	7	0	0			0	292			2	2	0	0	3	2	0	0	Carbamidomethylation; Phosphorylation (STY)	21841	Insulin-like growth factor I OS=Homo sapiens OX=9606 GN=IGF1 PE=1 SV=1
587	2569	Q5JSP0|FGD3_HUMAN	67.57	3	3	3	3	3	3	3	0	0	146	124	136	401	1	1	2	1	3	4	8	6	Phosphorylation (STY)	79401	FYVE RhoGEF and PH domain-containing protein 3 OS=Homo sapiens OX=9606 GN=FGD3 PE=1 SV=1
914	1511	Q92597|NDRG1_HUMAN	67.3	13	0	0	5	4	11	12			10.4	100	66.7	143	4	4	0	0	1	1	4	3	Carbamidomethylation; Oxidation (M); Acetylation (Protein N-term); Phosphorylation (STY)	42835	Protein NDRG1 OS=Homo sapiens OX=9606 GN=NDRG1 PE=1 SV=1
945	1632	Q15811|ITSN1_HUMAN	67.27	2	0	1	0	2	1	1		72.5		167	116	531	2	2	0	1	0	2	1	4	Acetylation (Protein N-term); Phosphorylation (STY)	195420	Intersectin-1 OS=Homo sapiens OX=9606 GN=ITSN1 PE=1 SV=3
818	1017	Q15154|PCM1_HUMAN	67.25	9	3	1	2	1	2	5	1780	69.5	131	21500	1010	3740	11	11	3	2	4	3	4	4	Carbamidomethylation; Oxidation (M); Acetylation (Protein N-term); Phosphorylation (STY)	228542	Pericentriolar material 1 protein OS=Homo sapiens OX=9606 GN=PCM1 PE=1 SV=5
1241	1176	P55008|AIF1_HUMAN	67.09	15	7	7	0	15	0	0	53.6	61.8		95.6			2	2	1	1	0	2	0	0	Phosphorylation (STY)	16703	Allograft inflammatory factor 1 OS=Homo sapiens OX=9606 GN=AIF1 PE=1 SV=1
1099	1363	Q9UN70|PCDGK_HUMAN	67	4	4	2	0	0	0	2	84.5						3	2	5	1	0	0	0	1	Acetylation (Protein N-term); Phosphorylation (STY)	101077	Protocadherin gamma-C3 OS=Homo sapiens OX=9606 GN=PCDHGC3 PE=1 SV=1
779	2475	P56705|WNT4_HUMAN	66.93	4	4	4	4	4	4	4	147	64.7	114	68.8	173	125	1	1	1	3	1	2	1	2	Carbamidomethylation; Phosphorylation (STY)	39052	Protein Wnt-4 OS=Homo sapiens OX=9606 GN=WNT4 PE=1 SV=4
1300	1346	Q15435|PP1R7_HUMAN	66.7	22	0	9	0	5	0	8		89.6		0		146	3	3	0	1	0	2	0	1	Phosphorylation (STY)	41564	Protein phosphatase 1 regulatory subunit 7 OS=Homo sapiens OX=9606 GN=PPP1R7 PE=1 SV=1
1799	2777	P32320|CDD_HUMAN	66.6	35	0	0	0	12	23	0				0	410		2	2	0	0	0	1	1	0	Carbamidomethylation; Oxidation (M); Phosphorylation (STY)	16185	Cytidine deaminase OS=Homo sapiens OX=9606 GN=CDA PE=1 SV=2
794	1064	Q04637|IF4G1_HUMAN	66.47	2	1	0	1	2	1	1	102		131	136	221	828	3	3	2	0	1	2	1	8	Phosphorylation (STY)	175490	Eukaryotic translation initiation factor 4 gamma 1 OS=Homo sapiens OX=9606 GN=EIF4G1 PE=1 SV=4
1269	1050	P52948|NUP98_HUMAN	66.42	4	1	1	0	1	2	1	0	622		32700	110	63.3	5	5	1	1	0	1	2	1	Carbamidomethylation; Oxidation (M); Acetylation (Protein N-term); Phosphorylation (STY)	197578	Nuclear pore complex protein Nup98-Nup96 OS=Homo sapiens OX=9606 GN=NUP98 PE=1 SV=4
1208	2733	P08559|ODPA_HUMAN	66.24	4	0	0	0	0	4	4					0	0	1	1	0	0	0	0	3	2	Oxidation (M); Phosphorylation (STY)	43296	Pyruvate dehydrogenase E1 component subunit alpha somatic form mitochondrial OS=Homo sapiens OX=9606 GN=PDHA1 PE=1 SV=3
1208	3069	P29803|ODPAT_HUMAN	66.24	4	0	0	0	0	4	4					0	0	1	1	0	0	0	0	3	2	Oxidation (M); Phosphorylation (STY)	42933	Pyruvate dehydrogenase E1 component subunit alpha testis-specific form mitochondrial OS=Homo sapiens OX=9606 GN=PDHA2 PE=1 SV=1
787	1211	O15232|MATN3_HUMAN	65.99	8	4	0	0	8	4	4	258			300	483	23.7	2	2	6	0	0	3	5	3	Carbamidomethylation; Phosphorylation (STY)	52817	Matrilin-3 OS=Homo sapiens OX=9606 GN=MATN3 PE=1 SV=2
1363	2140	Q6P2E9|EDC4_HUMAN	65.84	2	0	0	0	0	0	2						36	1	1	0	0	0	0	0	2	Phosphorylation (STY)	151661	Enhancer of mRNA-decapping protein 4 OS=Homo sapiens OX=9606 GN=EDC4 PE=1 SV=1
1370	1365	Q0JRZ9|FCHO2_HUMAN	65.84	4	0	0	0	0	1	4					0	157	2	2	0	0	0	0	1	3	Phosphorylation (STY)	88924	F-BAR domain only protein 2 OS=Homo sapiens OX=9606 GN=FCHO2 PE=1 SV=2
1257	857	Q5D862|FILA2_HUMAN	65.79	8	5	1	1	1	1	1	3020	6760	21.3	112	613	173	8	8	3	2	1	2	2	1	Acetylation (Protein N-term); Phosphorylation (STY)	248072	Filaggrin-2 OS=Homo sapiens OX=9606 GN=FLG2 PE=1 SV=1
1347	1387	P43121|MUC18_HUMAN	65.65	7	0	0	0	7	0	5				138		84.9	2	2	0	0	0	3	0	1	Carbamidomethylation; Phosphorylation (STY)	71608	Cell surface glycoprotein MUC18 OS=Homo sapiens OX=9606 GN=MCAM PE=1 SV=2
1602	1159	P49588|SYAC_HUMAN	65.52	5	0	0	0	5	0	0				24600			3	3	0	0	0	4	0	0	Phosphorylation (STY)	106810	Alanine--tRNA ligase cytoplasmic OS=Homo sapiens OX=9606 GN=AARS PE=1 SV=2
812	2940	P35606|COPB2_HUMAN	65.52	3	3	0	0	3	3	3	0			43.8	397	163	1	1	1	0	0	2	3	5	Phosphorylation (STY)	102487	Coatomer subunit beta' OS=Homo sapiens OX=9606 GN=COPB2 PE=1 SV=2
1277	1090	O14974|MYPT1_HUMAN	65.48	7	0	1	4	0	1	4		0	0		88.5	285	4	4	0	1	1	0	1	2	Acetylation (Protein N-term); Phosphorylation (STY)	115281	Protein phosphatase 1 regulatory subunit 12A OS=Homo sapiens OX=9606 GN=PPP1R12A PE=1 SV=1
637	3274	P08493|MGP_HUMAN	65.47	12	11	11	12	11	11	11	213	275	591	0	485	746	2	2	1	2	3	3	4	3	Phosphorylation (STY)	12353	Matrix Gla protein OS=Homo sapiens OX=9606 GN=MGP PE=1 SV=2
917	1534	Q92854|SEM4D_HUMAN	65.43	5	2	0	0	2	2	0	10.3			136	970		3	3	1	0	0	6	1	0	Carbamidomethylation; Oxidation (M); Phosphorylation (STY)	96150	Semaphorin-4D OS=Homo sapiens OX=9606 GN=SEMA4D PE=1 SV=1
1215	2094	Q9UK45|LSM7_HUMAN	65.3	40	0	0	0	40	24	24				85.8	0	0	2	2	0	0	0	3	1	1	Phosphorylation (STY)	11602	U6 snRNA-associated Sm-like protein LSm7 OS=Homo sapiens OX=9606 GN=LSM7 PE=1 SV=1
1554	1498	Q7Z6I6|RHG30_HUMAN	65.23	9	4	0	3	0	1	0	0		0		71		4	4	1	0	2	0	1	0	Carbamidomethylation; Acetylation (Protein N-term); Phosphorylation (STY)	118582	Rho GTPase-activating protein 30 OS=Homo sapiens OX=9606 GN=ARHGAP30 PE=1 SV=3
1082	2544	Q12907|LMAN2_HUMAN	65.2	7	0	4	7	3	4	3		51.8	238	341	45.5	53.4	2	2	0	1	2	3	1	1	Phosphorylation (STY)	40229	Vesicular integral-membrane protein VIP36 OS=Homo sapiens OX=9606 GN=LMAN2 PE=1 SV=1
511	2336	Q15293|RCN1_HUMAN	65.17	3	3	3	3	3	3	3	1760	1370	982	1280	2040	1600	1	1	3	4	4	2	7	4	Phosphorylation (STY)	38890	Reticulocalbin-1 OS=Homo sapiens OX=9606 GN=RCN1 PE=1 SV=1
838	1612	P18615|NELFE_HUMAN	65.03	11	0	0	0	6	3	8				37.5	104	203	3	3	0	0	0	1	6	3	Carbamidomethylation; Acetylation (Protein N-term); Phosphorylation (STY)	43240	Negative elongation factor E OS=Homo sapiens OX=9606 GN=NELFE PE=1 SV=3
387	1141	Q9BYE2|TMPSD_HUMAN	64.95	8	1	1	1	1	3	6					0	48.1	4	3	12	14	10	14	12	12	Acetylation (Protein N-term); Phosphorylation (STY)	63167	Transmembrane protease serine 13 OS=Homo sapiens OX=9606 GN=TMPRSS13 PE=2 SV=5
1272	1805	P01601|KVD16_HUMAN	64.94	30	0	0	16	14	0	0				65.2			2	1	0	0	1	2	0	0	Carbamidomethylation; Acetylation (Protein N-term); Phosphorylation (STY)	12730	Immunoglobulin kappa variable 1D-16 OS=Homo sapiens OX=9606 GN=IGKV1D-16 PE=3 SV=2
378	3270	P29972|AQP1_HUMAN	64.84	10	10	10	10	10	10	10	1990	1240	1480	1390	985	2830	1	1	14	7	8	7	8	10	Oxidation (M); Phosphorylation (STY)	28526	Aquaporin-1 OS=Homo sapiens OX=9606 GN=AQP1 PE=1 SV=3
1606	1807	G9CGD6|CNIPF_HUMAN	64.82	5	0	1	3	0	0	3		785	18.8			43.3	2	2	0	2	1	0	0	1	Phosphorylation (STY)	100365	CNK3/IPCEF1 fusion protein OS=Homo sapiens OX=9606 GN=CNK3/IPCEF1 PE=1 SV=1
1606	2684	Q8WWN9|ICEF1_HUMAN	64.82	7	0	0	7	0	0	7			18.8			43.3	1	1	0	0	1	0	0	1	Phosphorylation (STY)	48993	Interactor protein for cytohesin exchange factors 1 OS=Homo sapiens OX=9606 GN=IPCEF1 PE=1 SV=1
520	2749	Q7Z422|SZRD1_HUMAN	64.81	31	0	16	16	16	31	16		0	0	277	23.2	189	2	2	0	1	3	3	8	10	Phosphorylation (STY)	16997	SUZ domain-containing protein 1 OS=Homo sapiens OX=9606 GN=SZRD1 PE=1 SV=1
1194	2304	P29218|IMPA1_HUMAN	64.65	5	5	5	0	0	5	0	126	155			0		1	1	2	1	0	0	1	0	Phosphorylation (STY)	30189	Inositol monophosphatase 1 OS=Homo sapiens OX=9606 GN=IMPA1 PE=1 SV=1
635	1919	O60256|KPRB_HUMAN	64.4	10	0	8	0	0	0	10		0				1450	2	2	0	2	0	0	0	15	Oxidation (M); Phosphorylation (STY)	40926	Phosphoribosyl pyrophosphate synthase-associated protein 2 OS=Homo sapiens OX=9606 GN=PRPSAP2 PE=1 SV=1
1063	1168	Q53QZ3|RHG15_HUMAN	64.28	9	0	0	3	6	3	3			187	171	646	212	3	3	0	0	1	2	2	1	Acetylation (Protein N-term); Phosphorylation (STY)	54545	Rho GTPase-activating protein 15 OS=Homo sapiens OX=9606 GN=ARHGAP15 PE=1 SV=2
1621	1773	Q9Y3Q4|HCN4_HUMAN	64.26	2	1	0	0	1	0	1	33.9			187		1190	2	2	1	0	0	1	0	1	Phosphorylation (STY)	129042	Potassium/sodium hyperpolarization-activated cyclic nucleotide-gated channel 4 OS=Homo sapiens OX=9606 GN=HCN4 PE=1 SV=1
1255	3272	Q86WR0|CCD25_HUMAN	64.16	8	0	0	0	0	0	8						98.4	1	1	0	0	0	0	0	3	Phosphorylation (STY)	24479	Coiled-coil domain-containing protein 25 OS=Homo sapiens OX=9606 GN=CCDC25 PE=1 SV=2
1015	2079	Q9NZL4|HPBP1_HUMAN	64.13	4	4	4	0	0	4	4	74.2	103			72.1	389	1	1	1	2	0	0	1	2	Carbamidomethylation; Phosphorylation (STY)	39303	Hsp70-binding protein 1 OS=Homo sapiens OX=9606 GN=HSPBP1 PE=1 SV=2
1830	3276	Q7Z7M8|B3GN8_HUMAN	63.97	9	9	0	0	0	0	0	36.2						1	1	1	0	0	0	0	0	Carbamidomethylation; Phosphorylation (STY)	43396	UDP-GlcNAc:betaGal beta-1 3-N-acetylglucosaminyltransferase 8 OS=Homo sapiens OX=9606 GN=B3GNT8 PE=1 SV=1
828	1369	Q7L591|DOK3_HUMAN	63.94	7	5	3	5	5	7	7	350	0	0	531	883	233	2	2	1	1	1	1	5	5	Phosphorylation (STY)	53288	Docking protein 3 OS=Homo sapiens OX=9606 GN=DOK3 PE=1 SV=2
1292	2247	P01599|KV117_HUMAN	63.8	29	0	0	16	13	0	0				69.4			2	1	0	0	1	2	0	0	Carbamidomethylation; Acetylation (Protein N-term); Phosphorylation (STY)	12779	Immunoglobulin kappa variable 1-17 OS=Homo sapiens OX=9606 GN=IGKV1-17 PE=1 SV=2
771	2107	Q68BL7|OLM2A_HUMAN	63.8	4	3	3	0	3	3	2	85.9	51.8		184	143	0	2	2	3	5	0	1	2	1	Carbamidomethylation; Phosphorylation (STY)	73054	Olfactomedin-like protein 2A OS=Homo sapiens OX=9606 GN=OLFML2A PE=2 SV=1
1252	3275	Q9UD71|PPR1B_HUMAN	63.77	8	8	8	0	8	0	0	87.4	0		0			1	1	1	1	0	1	0	0	Phosphorylation (STY)	22963	Protein phosphatase 1 regulatory subunit 1B OS=Homo sapiens OX=9606 GN=PPP1R1B PE=1 SV=2
1147	1275	Q9UMS6|SYNP2_HUMAN	63.73	6	0	1	4	1	1	0		98.7	134	0	354		4	4	0	1	2	1	2	0	Carbamidomethylation; Acetylation (Protein N-term); Phosphorylation (STY)	117514	Synaptopodin-2 OS=Homo sapiens OX=9606 GN=SYNPO2 PE=1 SV=2
1155	1815	A0A0A0MT36|KVD21_HUMAN	63.62	44	0	0	0	14	40	0				447	40.2		3	3	0	0	0	4	2	0	Carbamidomethylation; Phosphorylation (STY)	12340	Immunoglobulin kappa variable 6D-21 OS=Homo sapiens OX=9606 GN=IGKV6D-21 PE=3 SV=1
953	3079	O75821|EIF3G_HUMAN	63.6	8	0	0	8	8	8	8			0	0	0	0	1	1	0	0	1	1	5	3	Phosphorylation (STY)	35611	Eukaryotic translation initiation factor 3 subunit G OS=Homo sapiens OX=9606 GN=EIF3G PE=1 SV=2
1050	983	Q8TAQ2|SMRC2_HUMAN	63.5	4	0	0	1	2	3	1			126	205	174	104	3	3	0	0	2	4	2	2	Phosphorylation (STY)	132879	SWI/SNF complex subunit SMARCC2 OS=Homo sapiens OX=9606 GN=SMARCC2 PE=1 SV=1
924	1216	Q13469|NFAC2_HUMAN	63.47	8	0	0	3	4	2	2			260	0	0	179	4	4	0	0	3	1	2	3	Oxidation (M); Phosphorylation (STY)	100146	Nuclear factor of activated T-cells cytoplasmic 2 OS=Homo sapiens OX=9606 GN=NFATC2 PE=1 SV=2
933	1287	P43243|MATR3_HUMAN	63.3	4	0	0	3	0	4	3			0		0	335	2	2	0	0	2	0	3	2	Phosphorylation (STY)	94623	Matrin-3 OS=Homo sapiens OX=9606 GN=MATR3 PE=1 SV=2
1219	2988	Q9NZD8|SPG21_HUMAN	63.27	6	6	6	0	0	0	6	96.7	63.6				0	1	1	1	3	0	0	0	1	Phosphorylation (STY)	34960	Maspardin OS=Homo sapiens OX=9606 GN=SPG21 PE=1 SV=1
626	1755	P49840|GSK3A_HUMAN	63.14	4	2	2	2	2	4	2	447	851	298	304	8290	848	2	2	5	3	1	1	4	2	Carbamidomethylation; Phosphorylation (STY)	50981	Glycogen synthase kinase-3 alpha OS=Homo sapiens OX=9606 GN=GSK3A PE=1 SV=2
626	2154	P49841|GSK3B_HUMAN	63.14	3	3	3	3	3	3	3	447	851	298	304	748	848	1	1	5	3	1	1	3	2	Carbamidomethylation; Phosphorylation (STY)	46744	Glycogen synthase kinase-3 beta OS=Homo sapiens OX=9606 GN=GSK3B PE=1 SV=2
1193	1971	Q01831|XPC_HUMAN	62.85	6	0	0	0	0	3	6					104	67.3	2	2	0	0	0	0	2	2	Phosphorylation (STY)	105953	DNA repair protein complementing XP-C cells OS=Homo sapiens OX=9606 GN=XPC PE=1 SV=4
1103	1432	P24588|AKAP5_HUMAN	62.74	7	2	7	0	2	2	2	170	186		149	184	171	2	2	1	2	0	1	1	1	Carbamidomethylation; Phosphorylation (STY)	47088	A-kinase anchor protein 5 OS=Homo sapiens OX=9606 GN=AKAP5 PE=1 SV=3
1429	2380	Q93100|KPBB_HUMAN	62.66	4	0	0	2	0	0	2			0			11.7	2	2	0	0	1	0	0	2	Phosphorylation (STY)	124884	Phosphorylase b kinase regulatory subunit beta OS=Homo sapiens OX=9606 GN=PHKB PE=1 SV=3
1379	2436	Q9UPP1|PHF8_HUMAN	62.61	2	0	0	0	0	2	2					81.8	51.6	1	1	0	0	0	0	1	1	Phosphorylation (STY)	117864	Histone lysine demethylase PHF8 OS=Homo sapiens OX=9606 GN=PHF8 PE=1 SV=3
919	1451	Q05469|LIPS_HUMAN	62.6	3	2	2	1	2	2	2	157	62.2	0	35.5	312	334	2	2	1	1	1	1	2	1	Phosphorylation (STY)	116598	Hormone-sensitive lipase OS=Homo sapiens OX=9606 GN=LIPE PE=1 SV=4
1572	1276	Q99590|SCAFB_HUMAN	62.58	2	0	0	0	0	2	2					72.4	120	2	2	0	0	0	0	1	2	Phosphorylation (STY)	164651	Protein SCAF11 OS=Homo sapiens OX=9606 GN=SCAF11 PE=1 SV=2
1278	1027	Q9H2G2|SLK_HUMAN	62.07	5	1	0	0	0	4	2	61.4				491	0	4	4	1	0	0	0	5	1	Carbamidomethylation; Phosphorylation (STY)	142695	STE20-like serine/threonine-protein kinase OS=Homo sapiens OX=9606 GN=SLK PE=1 SV=1
799	2718	P30533|AMRP_HUMAN	62.02	3	3	3	3	3	3	3	297	0	0	71.9	440	0	2	2	4	1	3	3	5	1	Phosphorylation (STY)	41466	Alpha-2-macroglobulin receptor-associated protein OS=Homo sapiens OX=9606 GN=LRPAP1 PE=1 SV=1
1264	892	Q9NR99|MXRA5_HUMAN	61.93	5	1	1	1	2	0	1	0	0	35.6	630	0	80.4	9	9	3	1	2	5	2	3	Carbamidomethylation; Oxidation (M); Acetylation (Protein N-term); Phosphorylation (STY)	312149	Matrix-remodeling-associated protein 5 OS=Homo sapiens OX=9606 GN=MXRA5 PE=1 SV=3
1338	1900	P40763|STAT3_HUMAN	61.92	5	3	0	0	0	0	3	0					0	2	2	1	0	0	0	0	2	Carbamidomethylation; Phosphorylation (STY)	88068	Signal transducer and activator of transcription 3 OS=Homo sapiens OX=9606 GN=STAT3 PE=1 SV=2
988	1675	Q9Y570|PPME1_HUMAN	61.71	9	3	3	0	3	9	3	191	373		184	104	1780	2	2	1	1	0	1	2	3	Carbamidomethylation; Phosphorylation (STY)	42315	Protein phosphatase methylesterase 1 OS=Homo sapiens OX=9606 GN=PPME1 PE=1 SV=3
1205	1218	P20340|RAB6A_HUMAN	61.67	17	0	6	0	0	0	17		96.2				213	2	2	0	5	0	0	0	2	Acetylation (Protein N-term); Phosphorylation (STY)	23593	Ras-related protein Rab-6A OS=Homo sapiens OX=9606 GN=RAB6A PE=1 SV=3
1177	923	P13637|AT1A3_HUMAN	61.64	7	0	2	0	3	0	4				96.6		267	5	2	0	1	0	5	0	4	Carbamidomethylation; Phosphorylation (STY)	111748	Sodium/potassium-transporting ATPase subunit alpha-3 OS=Homo sapiens OX=9606 GN=ATP1A3 PE=1 SV=3
1668	1719	O43516|WIPF1_HUMAN	61.64	5	0	0	0	0	2	3					1740	56.4	2	2	0	0	0	0	1	1	Phosphorylation (STY)	51259	WAS/WASL-interacting protein family member 1 OS=Homo sapiens OX=9606 GN=WIPF1 PE=1 SV=3
708	2419	A6NGB9|WIPF3_HUMAN	61.44	2	2	2	2	0	2	2	394	377	271		406	644	1	1	2	4	1	0	3	2	Phosphorylation (STY)	49458	WAS/WASL-interacting protein family member 3 OS=Homo sapiens OX=9606 GN=WIPF3 PE=1 SV=4
1217	2261	Q99447|PCY2_HUMAN	61.35	4	0	4	0	0	4	4		103			59.4	137	1	1	0	1	0	0	1	1	Phosphorylation (STY)	43836	Ethanolamine-phosphate cytidylyltransferase OS=Homo sapiens OX=9606 GN=PCYT2 PE=1 SV=1
1488	907	Q14005|IL16_HUMAN	61.22	15	6	1	2	2	4	5	1460	126	258	389	79.9	220	9	9	2	1	2	4	2	3	Carbamidomethylation; Oxidation (M); Acetylation (Protein N-term); Phosphorylation (STY)	141752	Pro-interleukin-16 OS=Homo sapiens OX=9606 GN=IL16 PE=1 SV=4
1138	925	Q5VST9|OBSCN_HUMAN	61.21	1	0	0	0	0	1	0	1080	665	3920	7310	11800	3390	9	9	5	5	4	4	6	4	Acetylation (Protein N-term); Phosphorylation (STY)	868496	Obscurin OS=Homo sapiens OX=9606 GN=OBSCN PE=1 SV=3
1354	2322	O60832|DKC1_HUMAN	61.07	4	0	0	0	0	4	4					64.7	80.2	1	1	0	0	0	0	1	1	Phosphorylation (STY)	57674	H/ACA ribonucleoprotein complex subunit DKC1 OS=Homo sapiens OX=9606 GN=DKC1 PE=1 SV=3
1036	905	Q96T37|RBM15_HUMAN	60.82	14	6	3	3	3	4	8	266	676	147	68.8	1460	13400	12	12	4	2	3	3	5	7	Acetylation (Protein N-term); Phosphorylation (STY)	107188	RNA-binding protein 15 OS=Homo sapiens OX=9606 GN=RBM15 PE=1 SV=2
783	1289	Q9Y3L3|3BP1_HUMAN	60.69	8	0	0	8	2	5	2			768	0	1490	1540	3	3	0	0	10	1	7	6	Phosphorylation (STY)	75713	SH3 domain-binding protein 1 OS=Homo sapiens OX=9606 GN=SH3BP1 PE=1 SV=3
793	1033	Q15878|CAC1E_HUMAN	60.59	1	0	1	0	0	0	0	0	107	53.3	10.8	74.5	119	3	3	1	3	2	1	2	2	Acetylation (Protein N-term); Phosphorylation (STY)	261729	Voltage-dependent R-type calcium channel subunit alpha-1E OS=Homo sapiens OX=9606 GN=CACNA1E PE=1 SV=3
776	2712	Q8NFU4|FDSCP_HUMAN	60.51	36	36	36	0	36	36	36	31	14.7		80.6	842	212	1	1	1	1	0	1	5	5	Phosphorylation (STY)	9700	Follicular dendritic cell secreted peptide OS=Homo sapiens OX=9606 GN=FDCSP PE=1 SV=1
1654	1596	P46734|MP2K3_HUMAN	60.5	10	0	0	0	5	0	5				29.7		87.6	2	2	0	0	0	1	0	1	Carbamidomethylation; Phosphorylation (STY)	39318	Dual specificity mitogen-activated protein kinase kinase 3 OS=Homo sapiens OX=9606 GN=MAP2K3 PE=1 SV=2
1654	1959	P52564|MP2K6_HUMAN	60.5	5	0	0	0	0	0	5						87.6	1	1	0	0	0	0	0	1	Carbamidomethylation; Phosphorylation (STY)	37492	Dual specificity mitogen-activated protein kinase kinase 6 OS=Homo sapiens OX=9606 GN=MAP2K6 PE=1 SV=1
1102	1424	O94979|SC31A_HUMAN	60.47	3	0	1	1	0	3	3		29.3	132		189	343	3	3	0	1	2	0	2	2	Acetylation (Protein N-term); Phosphorylation (STY)	133015	Protein transport protein Sec31A OS=Homo sapiens OX=9606 GN=SEC31A PE=1 SV=3
1114	2091	O95104|SCAF4_HUMAN	60.42	4	0	1	0	3	3	3		0		12.7	41.1	42.4	2	2	0	1	0	1	2	2	Phosphorylation (STY)	125869	SR-related and CTD-associated factor 4 OS=Homo sapiens OX=9606 GN=SCAF4 PE=1 SV=3
989	1043	P16070|CD44_HUMAN	60.1	6	0	0	5	1	2	1			205	49.3	304	483	3	3	0	0	3	1	5	1	Phosphorylation (STY)	81538	CD44 antigen OS=Homo sapiens OX=9606 GN=CD44 PE=1 SV=3
1840	3280	P46060|RAGP1_HUMAN	60.08	5	0	0	0	0	0	5						66.2	1	1	0	0	0	0	0	1	Phosphorylation (STY)	63542	Ran GTPase-activating protein 1 OS=Homo sapiens OX=9606 GN=RANGAP1 PE=1 SV=1
1589	1783	Q9Y4F9|RIPR2_HUMAN	59.8	1	0	0	0	0	1	0					131		1	1	0	0	0	0	1	0	Phosphorylation (STY)	118519	Rho family-interacting cell polarization regulator 2 OS=Homo sapiens OX=9606 GN=RIPOR2 PE=1 SV=4
1343	888	O15117|FYB1_HUMAN	59.59	11	0	2	2	0	9	0		32.6	417		785		6	6	0	1	1	0	5	0	Acetylation (Protein N-term); Phosphorylation (STY)	85387	FYN-binding protein 1 OS=Homo sapiens OX=9606 GN=FYB1 PE=1 SV=2
1097	2608	Q96DA2|RB39B_HUMAN	59.53	11	8	8	11	8	0	8	131	221	101	119		160	2	2	1	2	3	1	0	1	Carbamidomethylation; Phosphorylation (STY)	24622	Ras-related protein Rab-39B OS=Homo sapiens OX=9606 GN=RAB39B PE=1 SV=1
1158	1339	Q9P0K1|ADA22_HUMAN	59.41	3	3	3	1	1	0	3	281	0	69.3	238		205	2	2	2	3	1	2	0	2	Carbamidomethylation; Phosphorylation (STY)	100433	Disintegrin and metalloproteinase domain-containing protein 22 OS=Homo sapiens OX=9606 GN=ADAM22 PE=1 SV=1
1061	937	Q9UPN6|SCAF8_HUMAN	59.33	4	0	1	3	1	3	2		0	468	0	264	462	5	5	0	1	3	2	3	3	Carbamidomethylation; Oxidation (M); Acetylation (Protein N-term); Phosphorylation (STY)	140519	SR-related and CTD-associated factor 8 OS=Homo sapiens OX=9606 GN=SCAF8 PE=1 SV=1
991	1831	Q969E4|TCAL3_HUMAN	59.3	26	10	0	20	8	14	18	39.3		323	85.5	147	197	5	5	2	0	3	1	3	2	Acetylation (Protein N-term); Phosphorylation (STY)	22502	Transcription elongation factor A protein-like 3 OS=Homo sapiens OX=9606 GN=TCEAL3 PE=1 SV=1
991	2184	Q6IPX3|TCAL6_HUMAN	59.3	16	10	0	10	8	14	8	39.3		293	85.5	147	135	3	3	2	0	2	1	3	1	Acetylation (Protein N-term); Phosphorylation (STY)	22298	Transcription elongation factor A protein-like 6 OS=Homo sapiens OX=9606 GN=TCEAL6 PE=2 SV=1
991	2215	Q5H9L2|TCAL5_HUMAN	59.3	15	9	0	9	8	14	8	39.3		293	85.5	147	135	3	3	2	0	2	1	3	1	Acetylation (Protein N-term); Phosphorylation (STY)	23307	Transcription elongation factor A protein-like 5 OS=Homo sapiens OX=9606 GN=TCEAL5 PE=1 SV=1
899	2947	Q9Y6G9|DC1L1_HUMAN	59.25	4	4	4	4	4	4	4	39.2	32.2	32.2	0	25.6	233	1	1	1	1	1	2	3	2	Phosphorylation (STY)	56579	Cytoplasmic dynein 1 light intermediate chain 1 OS=Homo sapiens OX=9606 GN=DYNC1LI1 PE=1 SV=3
1107	2600	Q5VV43|K0319_HUMAN	59.23	1	1	1	0	1	0	0	0	51.6		0			1	1	1	3	0	1	0	0	Phosphorylation (STY)	117763	Dyslexia-associated protein KIAA0319 OS=Homo sapiens OX=9606 GN=KIAA0319 PE=1 SV=1
918	867	Q96PK6|RBM14_HUMAN	59.2	6	0	0	0	0	6	2					22.4	0	4	4	0	0	0	0	9	9	Phosphorylation (STY)	69492	RNA-binding protein 14 OS=Homo sapiens OX=9606 GN=RBM14 PE=1 SV=2
1841	3282	Q9NWB7|IFT57_HUMAN	59.07	5	0	5	0	0	0	0		24.6					1	1	0	1	0	0	0	0	Phosphorylation (STY)	49108	Intraflagellar transport protein 57 homolog OS=Homo sapiens OX=9606 GN=IFT57 PE=1 SV=1
888	2835	P22003|BMP5_HUMAN	58.85	3	3	3	3	3	3	3	790	732	21.4	1320	0	29.2	1	1	3	2	1	1	1	1	Oxidation (M); Phosphorylation (STY)	51737	Bone morphogenetic protein 5 OS=Homo sapiens OX=9606 GN=BMP5 PE=2 SV=1
1256	957	Q9UPN3|MACF1_HUMAN	58.79	2	0	0	0	0	0	1	0	174	115	3800		0	11	11	1	1	1	4	0	5	Carbamidomethylation; Oxidation (M); Phosphorylation (STY)	838323	Microtubule-actin cross-linking factor 1 isoforms 1/2/3/5 OS=Homo sapiens OX=9606 GN=MACF1 PE=1 SV=4
1375	1980	P19022|CADH2_HUMAN	58.76	4	4	0	3	0	0	3	120		149			222	2	2	2	0	1	0	0	1	Phosphorylation (STY)	99809	Cadherin-2 OS=Homo sapiens OX=9606 GN=CDH2 PE=1 SV=4
962	1548	O60613|SEP15_HUMAN	58.68	13	8	0	8	5	8	8	38.4		0	0	73.9	91.1	2	2	2	0	1	1	1	2	Phosphorylation (STY)	18092	Selenoprotein F OS=Homo sapiens OX=9606 GN=SELENOF PE=1 SV=4
994	1328	P49756|RBM25_HUMAN	58.31	2	0	0	2	1	2	2			140	4560	404	410	2	2	0	0	1	1	1	3	Phosphorylation (STY)	100186	RNA-binding protein 25 OS=Homo sapiens OX=9606 GN=RBM25 PE=1 SV=3
966	1028	Q9H1B7|I2BPL_HUMAN	58.3	14	2	2	4	4	11	4	18.7	51.4	150	136	909	76.1	7	7	1	1	2	2	6	4	Carbamidomethylation; Acetylation (Protein N-term); Phosphorylation (STY)	82659	Probable E3 ubiquitin-protein ligase IRF2BPL OS=Homo sapiens OX=9606 GN=IRF2BPL PE=1 SV=1
1105	2467	Q9H2U2|IPYR2_HUMAN	58.27	4	0	0	4	4	4	4			17.3	99.2	140	141	1	1	0	0	1	2	1	1	Phosphorylation (STY)	37920	Inorganic pyrophosphatase 2 mitochondrial OS=Homo sapiens OX=9606 GN=PPA2 PE=1 SV=2
767	2689	P08962|CD63_HUMAN	58.26	12	4	4	0	0	12	12	54.8	41.8			1480	2870	2	2	3	1	0	0	3	7	Carbamidomethylation; Phosphorylation (STY)	25637	CD63 antigen OS=Homo sapiens OX=9606 GN=CD63 PE=1 SV=2
1106	2557	P18858|DNLI1_HUMAN	58.22	2	0	0	0	2	2	2				524	56.4	383	1	1	0	0	0	2	1	2	Phosphorylation (STY)	101736	DNA ligase 1 OS=Homo sapiens OX=9606 GN=LIG1 PE=1 SV=1
841	1234	Q504Y0|S39AC_HUMAN	58.13	4	1	4	1	1	1	1	0	11.8	0	99.7	0	0	2	2	1	5	1	1	1	1	Carbamidomethylation; Phosphorylation (STY)	76666	Zinc transporter ZIP12 OS=Homo sapiens OX=9606 GN=SLC39A12 PE=2 SV=3
998	2497	P55010|IF5_HUMAN	58.05	6	0	0	0	0	0	6						455	1	1	0	0	0	0	0	10	Phosphorylation (STY)	49223	Eukaryotic translation initiation factor 5 OS=Homo sapiens OX=9606 GN=EIF5 PE=1 SV=2
830	1523	Q6ZVL6|K154L_HUMAN	58.03	2	2	1	0	1	1	1	672	697		208	199	322	3	3	3	5	0	1	1	2	Oxidation (M); Acetylation (Protein N-term); Phosphorylation (STY)	198997	UPF0606 protein KIAA1549L OS=Homo sapiens OX=9606 GN=KIAA1549L PE=2 SV=2
951	2229	Q70J99|UN13D_HUMAN	58.02	3	0	3	3	0	3	3		0	31		45.8	74.1	1	1	0	1	3	0	1	2	Carbamidomethylation; Phosphorylation (STY)	123282	Protein unc-13 homolog D OS=Homo sapiens OX=9606 GN=UNC13D PE=1 SV=1
1251	3025	P19237|TNNI1_HUMAN	58.02	6	0	6	0	0	6	0		0			0		1	1	0	2	0	0	1	0	Phosphorylation (STY)	21692	Troponin I slow skeletal muscle OS=Homo sapiens OX=9606 GN=TNNI1 PE=1 SV=3
901	2538	P28482|MK01_HUMAN	57.91	9	5	5	9	0	5	5	86.5	0	0		30.8	76.3	2	2	1	1	2	0	2	3	Oxidation (M); Phosphorylation (STY)	41390	Mitogen-activated protein kinase 1 OS=Homo sapiens OX=9606 GN=MAPK1 PE=1 SV=3
1573	1315	Q14118|DAG1_HUMAN	57.91	13	0	0	0	2	11	0				0	6000		3	3	0	0	0	1	2	0	Carbamidomethylation; Acetylation (Protein N-term); Phosphorylation (STY)	97441	Dystroglycan OS=Homo sapiens OX=9606 GN=DAG1 PE=1 SV=2
938	2028	B4DS77|SHSA9_HUMAN	57.8	7	2	7	2	2	2	2	0	72.4	110	0	0	0	2	2	1	2	1	1	1	2	Phosphorylation (STY)	46925	Protein shisa-9 OS=Homo sapiens OX=9606 GN=SHISA9 PE=2 SV=3
947	1872	Q96MK3|FA20A_HUMAN	57.61	6	6	0	6	6	6	6	22.7		15	80.8	48.5	27.7	1	1	1	0	1	1	2	1	Phosphorylation (STY)	61417	Pseudokinase FAM20A OS=Homo sapiens OX=9606 GN=FAM20A PE=1 SV=4
1261	1169	Q9NYV4|CDK12_HUMAN	57.56	3	0	0	1	0	1	2			235		68.1	0	3	3	0	0	2	0	1	2	Phosphorylation (STY)	164154	Cyclin-dependent kinase 12 OS=Homo sapiens OX=9606 GN=CDK12 PE=1 SV=2
1403	2779	Q14558|KPRA_HUMAN	57.43	8	0	0	0	0	0	8						173	1	1	0	0	0	0	0	2	Carbamidomethylation; Oxidation (M); Phosphorylation (STY)	39394	Phosphoribosyl pyrophosphate synthase-associated protein 1 OS=Homo sapiens OX=9606 GN=PRPSAP1 PE=1 SV=2
764	1654	Q9UHD8|SEPT9_HUMAN	57.41	6	2	0	2	2	6	2	0		447	139	407	360	2	2	3	0	5	2	3	3	Phosphorylation (STY)	65402	Septin-9 OS=Homo sapiens OX=9606 GN=SEPTIN9 PE=1 SV=2
1192	1619	Q9H772|GREM2_HUMAN	57.35	25	10	10	0	7	10	8	88.4	62.8		37.1	168	0	3	3	1	2	0	1	3	1	Carbamidomethylation; Phosphorylation (STY)	19320	Gremlin-2 OS=Homo sapiens OX=9606 GN=GREM2 PE=1 SV=1
736	3038	O15400|STX7_HUMAN	57.29	5	5	5	5	5	5	5	1490	1540	433	561	522	1200	1	1	4	5	1	3	3	3	Phosphorylation (STY)	29816	Syntaxin-7 OS=Homo sapiens OX=9606 GN=STX7 PE=1 SV=4
1684	2379	Q6ZNJ1|NBEL2_HUMAN	57.27	1	0	0	0	0	1	0					28.8		1	1	0	0	0	0	1	0	Phosphorylation (STY)	302515	Neurobeachin-like protein 2 OS=Homo sapiens OX=9606 GN=NBEAL2 PE=1 SV=2
999	1856	Q06210|GFPT1_HUMAN	56.96	4	0	0	1	0	4	4			130		262	196	2	2	0	0	1	0	3	5	Carbamidomethylation; Phosphorylation (STY)	78806	Glutamine--fructose-6-phosphate aminotransferase [isomerizing] 1 OS=Homo sapiens OX=9606 GN=GFPT1 PE=1 SV=3
1622	1803	Q08945|SSRP1_HUMAN	56.94	3	0	0	0	0	3	3					124	140	1	1	0	0	0	0	1	1	Phosphorylation (STY)	81075	FACT complex subunit SSRP1 OS=Homo sapiens OX=9606 GN=SSRP1 PE=1 SV=1
770	1347	Q9H8L6|MMRN2_HUMAN	56.79	3	1	1	1	3	1	1	0	99.9	45.3	759	15.3	246	2	2	1	1	1	3	4	2	Acetylation (Protein N-term); Phosphorylation (STY)	104409	Multimerin-2 OS=Homo sapiens OX=9606 GN=MMRN2 PE=1 SV=2
1325	1319	Q9Y4E1|WAC2C_HUMAN	56.77	2	0	0	0	1	2	2				0	66.5	78.8	2	2	0	0	0	1	1	1	Phosphorylation (STY)	144911	WASH complex subunit 2C OS=Homo sapiens OX=9606 GN=WASHC2C PE=1 SV=4
1505	1148	Q5VT52|RPRD2_HUMAN	56.47	3	0	0	1	1	2	0			200	1760	306		3	3	0	0	2	6	3	0	Acetylation (Protein N-term); Phosphorylation (STY)	156019	Regulation of nuclear pre-mRNA domain-containing protein 2 OS=Homo sapiens OX=9606 GN=RPRD2 PE=1 SV=1
1386	1617	Q96JF0|SIAT2_HUMAN	56.44	4	2	0	0	4	0	0	0			0			3	3	2	0	0	2	0	0	Phosphorylation (STY)	60158	Beta-galactoside alpha-2 6-sialyltransferase 2 OS=Homo sapiens OX=9606 GN=ST6GAL2 PE=1 SV=2
848	3051	P08833|IBP1_HUMAN	56.38	4	4	4	4	0	4	4	925	0	150		511	0	1	1	4	2	2	0	2	1	Phosphorylation (STY)	27904	Insulin-like growth factor-binding protein 1 OS=Homo sapiens OX=9606 GN=IGFBP1 PE=1 SV=1
1234	2434	Q13057|COASY_HUMAN	56.34	7	0	0	0	0	0	7						63.2	1	1	0	0	0	0	0	3	Phosphorylation (STY)	62329	Bifunctional coenzyme A synthase OS=Homo sapiens OX=9606 GN=COASY PE=1 SV=4
837	2176	Q13523|PRP4B_HUMAN	56.09	2	0	0	0	0	2	2					62.9	26.4	1	1	0	0	0	0	3	5	Carbamidomethylation; Phosphorylation (STY)	116987	Serine/threonine-protein kinase PRP4 homolog OS=Homo sapiens OX=9606 GN=PRPF4B PE=1 SV=3
1671	2275	O14523|C2C2L_HUMAN	56.07	3	0	0	0	0	0	3						84.4	1	1	0	0	0	0	0	2	Phosphorylation (STY)	76181	Phospholipid transfer protein C2CD2L OS=Homo sapiens OX=9606 GN=C2CD2L PE=1 SV=3
1629	1281	O95671|ASML_HUMAN	55.95	10	0	0	0	1	4	4				0	0	78.1	3	3	0	0	0	1	1	1	Carbamidomethylation; Phosphorylation (STY)	68857	Probable bifunctional dTTP/UTP pyrophosphatase/methyltransferase protein OS=Homo sapiens OX=9606 GN=ASMTL PE=1 SV=3
814	2691	Q9NR19|ACSA_HUMAN	55.86	1	1	1	0	0	1	1	183	18.8			309	1040	1	1	2	2	0	0	3	3	Phosphorylation (STY)	78580	Acetyl-coenzyme A synthetase cytoplasmic OS=Homo sapiens OX=9606 GN=ACSS2 PE=1 SV=1
1131	2873	P56211|ARP19_HUMAN	55.77	10	0	0	0	0	10	0					128		1	1	0	0	0	0	4	0	Oxidation (M); Phosphorylation (STY)	12323	cAMP-regulated phosphoprotein 19 OS=Homo sapiens OX=9606 GN=ARPP19 PE=1 SV=2
1131	3291	O43768|ENSA_HUMAN	55.77	9	0	0	0	0	9	0					128		1	1	0	0	0	0	4	0	Oxidation (M); Phosphorylation (STY)	13389	Alpha-endosulfine OS=Homo sapiens OX=9606 GN=ENSA PE=1 SV=1
1393	2652	Q96EV2|RBM33_HUMAN	55.29	1	0	0	0	0	0	1						88	1	1	0	0	0	0	0	2	Phosphorylation (STY)	129986	RNA-binding protein 33 OS=Homo sapiens OX=9606 GN=RBM33 PE=1 SV=3
804	1152	Q9BZ76|CNTP3_HUMAN	55.21	7	1	1	1	3	3	1	72.9	52	53.8	0	156	198	3	3	2	2	1	1	3	2	Carbamidomethylation; Oxidation (M); Phosphorylation (STY)	140690	Contactin-associated protein-like 3 OS=Homo sapiens OX=9606 GN=CNTNAP3 PE=2 SV=3
804	1717	Q96NU0|CNT3B_HUMAN	55.21	3	1	1	1	0	3	1	72.9	52	53.8		156	198	2	2	2	2	1	0	3	2	Phosphorylation (STY)	140414	Contactin-associated protein-like 3B OS=Homo sapiens OX=9606 GN=CNTNAP3B PE=2 SV=3
284	1194	Q9P2P6|STAR9_HUMAN	55.11	2	1	0	1	1	0	0	0	0	84.6	45.3	0	13	7	7	24	46	16	12	9	8	Carbamidomethylation; Acetylation (Protein N-term); Phosphorylation (STY)	516351	StAR-related lipid transfer protein 9 OS=Homo sapiens OX=9606 GN=STARD9 PE=1 SV=3
1236	2894	Q9NYB0|TE2IP_HUMAN	55	4	0	0	0	0	4	4					124	106	1	1	0	0	0	0	3	1	Phosphorylation (STY)	44260	Telomeric repeat-binding factor 2-interacting protein 1 OS=Homo sapiens OX=9606 GN=TERF2IP PE=1 SV=1
1258	874	Q9Y6V0|PCLO_HUMAN	54.85	3	1	1	0	0	1	0	287	99.9	700	970	25.7	0	11	11	4	4	1	2	2	1	Acetylation (Protein N-term); Phosphorylation (STY)	560707	Protein piccolo OS=Homo sapiens OX=9606 GN=PCLO PE=1 SV=5
1245	3102	O43852|CALU_HUMAN	54.71	3	3	3	0	0	3	0	119	51.4			121		1	1	2	1	0	0	1	0	Phosphorylation (STY)	37107	Calumenin OS=Homo sapiens OX=9606 GN=CALU PE=1 SV=2
1005	1662	Q14847|LASP1_HUMAN	54.57	14	9	0	0	5	14	9	0			106	362	386	2	2	1	0	0	1	6	1	Phosphorylation (STY)	29717	LIM and SH3 domain protein 1 OS=Homo sapiens OX=9606 GN=LASP1 PE=1 SV=2
1206	1447	Q14324|MYPC2_HUMAN	54.57	5	0	2	0	3	2	2		0		29	340	135	2	2	0	1	0	1	1	1	Carbamidomethylation; Acetylation (Protein N-term); Phosphorylation (STY)	128072	Myosin-binding protein C fast-type OS=Homo sapiens OX=9606 GN=MYBPC2 PE=1 SV=2
1328	2421	P04180|LCAT_HUMAN	54.56	11	5	0	0	6	0	0	0			40			2	2	1	0	0	2	0	0	Oxidation (M); Acetylation (Protein N-term); Phosphorylation (STY)	49578	Phosphatidylcholine-sterol acyltransferase OS=Homo sapiens OX=9606 GN=LCAT PE=1 SV=1
699	1624	Q5JVS0|HABP4_HUMAN	54.51	8	6	6	6	8	6	6	371	246	371	278	419	459	2	2	4	3	2	2	3	2	Acetylation (Protein N-term); Phosphorylation (STY)	45785	Intracellular hyaluronan-binding protein 4 OS=Homo sapiens OX=9606 GN=HABP4 PE=1 SV=1
1351	2395	O60279|SUSD5_HUMAN	54.45	1	0	1	0	0	0	1		26.2				125	1	1	0	2	0	0	0	1	Phosphorylation (STY)	68021	Sushi domain-containing protein 5 OS=Homo sapiens OX=9606 GN=SUSD5 PE=1 SV=3
1171	902	Q16658|FSCN1_HUMAN	54.38	12	2	2	0	8	0	2	0	0		212		298	5	5	1	3	0	7	0	1	Carbamidomethylation; Acetylation (Protein N-term); Phosphorylation (STY)	54530	Fascin OS=Homo sapiens OX=9606 GN=FSCN1 PE=1 SV=3
1128	3408	O00501|CLD5_HUMAN	54.28	5	5	5	0	5	0	0	74.7	0		47			2	2	3	2	0	1	0	0	Phosphorylation (STY)	23147	Claudin-5 OS=Homo sapiens OX=9606 GN=CLDN5 PE=2 SV=1
1399	2160	P08621|RU17_HUMAN	54.2	3	0	0	0	0	3	0					0		1	1	0	0	0	0	3	0	Phosphorylation (STY)	51557	U1 small nuclear ribonucleoprotein 70 kDa OS=Homo sapiens OX=9606 GN=SNRNP70 PE=1 SV=2
1006	1887	Q8N9T8|KRI1_HUMAN	54.2	4	0	0	0	0	3	4					93.7	107	2	2	0	0	0	0	3	4	Phosphorylation (STY)	82598	Protein KRI1 homolog OS=Homo sapiens OX=9606 GN=KRI1 PE=1 SV=3
1563	1571	P23246|SFPQ_HUMAN	54.14	7	4	4	4	3	0	0	350	31.7	122	0			2	2	2	1	1	1	0	0	Acetylation (Protein N-term); Phosphorylation (STY)	76150	Splicing factor proline- and glutamine-rich OS=Homo sapiens OX=9606 GN=SFPQ PE=1 SV=2
920	1774	Q32P44|EMAL3_HUMAN	54.05	3	0	0	3	1	1	1			1770	31.8	394	302	2	2	0	0	2	2	3	2	Phosphorylation (STY)	95197	Echinoderm microtubule-associated protein-like 3 OS=Homo sapiens OX=9606 GN=EML3 PE=1 SV=1
1627	1105	Q8TDZ2|MICA1_HUMAN	54.02	5	0	0	1	2	4	0			77.1	252	86.5		4	4	0	0	1	2	2	0	Phosphorylation (STY)	117875	[F-actin]-monooxygenase MICAL1 OS=Homo sapiens OX=9606 GN=MICAL1 PE=1 SV=2
834	965	Q9UKM9|RALY_HUMAN	53.75	22	0	3	3	12	14	3		0	609	64	1890	1280	4	4	0	1	2	3	4	3	Acetylation (Protein N-term); Phosphorylation (STY)	32463	RNA-binding protein Raly OS=Homo sapiens OX=9606 GN=RALY PE=1 SV=1
1490	1231	Q5JTV8|TOIP1_HUMAN	53.53	10	6	0	0	6	0	3	53.6			0		0	2	2	2	0	0	1	0	1	Phosphorylation (STY)	66248	Torsin-1A-interacting protein 1 OS=Homo sapiens OX=9606 GN=TOR1AIP1 PE=1 SV=2
1801	2824	Q02447|SP3_HUMAN	53.37	7	0	0	0	0	7	0					0		1	1	0	0	0	0	1	0	Phosphorylation (STY)	81925	Transcription factor Sp3 OS=Homo sapiens OX=9606 GN=SP3 PE=1 SV=3
1550	1769	P25098|ARBK1_HUMAN	53.2	4	0	0	3	0	2	2			6080		0	0	2	2	0	0	1	0	2	2	Carbamidomethylation; Oxidation (M); Acetylation (Protein N-term); Phosphorylation (STY)	79574	Beta-adrenergic receptor kinase 1 OS=Homo sapiens OX=9606 GN=GRK2 PE=1 SV=2
860	919	Q8WXD9|CSKI1_HUMAN	53.18	8	2	2	4	2	2	2	0	36.6	82.9	1690	96.3	49.7	8	8	4	3	7	3	3	3	Acetylation (Protein N-term); Phosphorylation (STY)	149813	Caskin-1 OS=Homo sapiens OX=9606 GN=CASKIN1 PE=1 SV=1
1184	1317	Q53T59|H1BP3_HUMAN	53.18	13	5	5	0	0	10	8	36.9	19.5			326	389	3	3	1	1	0	0	2	2	Phosphorylation (STY)	42780	HCLS1-binding protein 3 OS=Homo sapiens OX=9606 GN=HS1BP3 PE=1 SV=1
1377	2382	Q92733|PRCC_HUMAN	53.15	8	0	0	8	0	5	0			48.3		64.2		2	2	0	0	2	0	2	0	Phosphorylation (STY)	52418	Proline-rich protein PRCC OS=Homo sapiens OX=9606 GN=PRCC PE=1 SV=1
1173	2027	P23497|SP100_HUMAN	53.14	2	0	0	0	2	2	2				46	168	0	1	1	0	0	0	1	1	1	Phosphorylation (STY)	100417	Nuclear autoantigen Sp-100 OS=Homo sapiens OX=9606 GN=SP100 PE=1 SV=3
957	2491	Q9HC35|EMAL4_HUMAN	53.11	2	0	0	0	0	2	2					265	186	1	1	0	0	0	0	5	2	Phosphorylation (STY)	108916	Echinoderm microtubule-associated protein-like 4 OS=Homo sapiens OX=9606 GN=EML4 PE=1 SV=3
1423	3238	P13224|GP1BB_HUMAN	53.04	7	0	7	0	0	0	7		0				0	1	1	0	1	0	0	0	1	Phosphorylation (STY)	21718	Platelet glycoprotein Ib beta chain OS=Homo sapiens OX=9606 GN=GP1BB PE=1 SV=1
1804	2943	P54920|SNAA_HUMAN	52.82	6	0	0	0	0	0	6						61.5	1	1	0	0	0	0	0	1	Phosphorylation (STY)	33233	Alpha-soluble NSF attachment protein OS=Homo sapiens OX=9606 GN=NAPA PE=1 SV=3
1367	2547	P56159|GFRA1_HUMAN	52.74	4	0	0	0	4	4	4				48.4	42.4	51.4	1	1	0	0	0	1	1	1	Carbamidomethylation; Phosphorylation (STY)	51456	GDNF family receptor alpha-1 OS=Homo sapiens OX=9606 GN=GFRA1 PE=1 SV=2
1806	3022	Q9BXJ5|C1QT2_HUMAN	52.5	7	7	0	0	0	0	7	0					45.2	1	1	1	0	0	0	0	1	Phosphorylation (STY)	29952	Complement C1q tumor necrosis factor-related protein 2 OS=Homo sapiens OX=9606 GN=C1QTNF2 PE=1 SV=1
1243	2469	Q8IU68|TMC8_HUMAN	52.46	2	0	0	2	0	2	2			42.2		80.1	112	1	1	0	0	1	0	1	1	Phosphorylation (STY)	81642	Transmembrane channel-like protein 8 OS=Homo sapiens OX=9606 GN=TMC8 PE=1 SV=1
522	3060	Q6IAA8|LTOR1_HUMAN	52.26	7	7	7	7	0	7	7	2420	1110	789		2220	3020	1	1	4	4	5	0	5	4	Phosphorylation (STY)	17745	Ragulator complex protein LAMTOR1 OS=Homo sapiens OX=9606 GN=LAMTOR1 PE=1 SV=2
1394	2773	O15247|CLIC2_HUMAN	52.19	11	0	0	0	0	11	0					58.1		1	1	0	0	0	0	3	0	Phosphorylation (STY)	28356	Chloride intracellular channel protein 2 OS=Homo sapiens OX=9606 GN=CLIC2 PE=1 SV=3
1617	2593	Q8NC44|RETR2_HUMAN	52.09	3	3	3	0	0	0	3	148	0				299	1	1	3	1	0	0	0	2	Acetylation (Protein N-term); Phosphorylation (STY)	57830	Reticulophagy regulator 2 OS=Homo sapiens OX=9606 GN=RETREG2 PE=1 SV=3
1226	2461	P09493|TPM1_HUMAN	52.09	6	0	0	6	0	0	0			154				1	1	0	0	3	0	0	0	Phosphorylation (STY)	32709	Tropomyosin alpha-1 chain OS=Homo sapiens OX=9606 GN=TPM1 PE=1 SV=2
1226	2510	P06753|TPM3_HUMAN	52.09	6	0	0	6	0	0	0			154				1	1	0	0	3	0	0	0	Phosphorylation (STY)	32950	Tropomyosin alpha-3 chain OS=Homo sapiens OX=9606 GN=TPM3 PE=1 SV=2
1372	1439	Q9UBC2|EP15R_HUMAN	52.08	3	0	0	0	1	0	2				0		103	2	2	0	0	0	1	0	2	Oxidation (M); Phosphorylation (STY)	94255	Epidermal growth factor receptor substrate 15-like 1 OS=Homo sapiens OX=9606 GN=EPS15L1 PE=1 SV=1
1232	2240	Q6UUV7|CRTC3_HUMAN	52.04	4	0	0	0	0	4	3					84.1	27.5	2	2	0	0	0	0	3	1	Phosphorylation (STY)	66959	CREB-regulated transcription coactivator 3 OS=Homo sapiens OX=9606 GN=CRTC3 PE=1 SV=2
651	2665	Q9BWV1|BOC_HUMAN	52.04	1	1	1	1	1	1	1	902	638	144	1060	348	0	1	1	7	6	2	3	2	2	Oxidation (M); Phosphorylation (STY)	121059	Brother of CDO OS=Homo sapiens OX=9606 GN=BOC PE=1 SV=1
1605	1646	P28066|PSA5_HUMAN	51.73	14	0	0	8	0	0	14			1260			1060	2	2	0	0	1	0	0	2	Phosphorylation (STY)	26411	Proteasome subunit alpha type-5 OS=Homo sapiens OX=9606 GN=PSMA5 PE=1 SV=3
1767	2534	O95394|AGM1_HUMAN	51.69	4	0	0	0	0	0	4						0	1	1	0	0	0	0	0	1	Phosphorylation (STY)	59852	Phosphoacetylglucosamine mutase OS=Homo sapiens OX=9606 GN=PGM3 PE=1 SV=1
1144	1600	Q13459|MYO9B_HUMAN	51.67	2	0	0	1	0	1	1		140	0		37.6	170	3	3	0	1	1	0	1	4	Acetylation (Protein N-term); Phosphorylation (STY)	243398	Unconventional myosin-IXb OS=Homo sapiens OX=9606 GN=MYO9B PE=1 SV=3
1212	1409	Q8WUI4|HDAC7_HUMAN	51.48	3	0	1	0	0	2	2		0			0	224	2	2	0	1	0	0	1	2	Phosphorylation (STY)	102927	Histone deacetylase 7 OS=Homo sapiens OX=9606 GN=HDAC7 PE=1 SV=2
1183	1149	Q969R2|OSBP2_HUMAN	51.42	4	0	0	0	0	0	4						122	2	2	0	0	0	0	0	5	Phosphorylation (STY)	101266	Oxysterol-binding protein 2 OS=Homo sapiens OX=9606 GN=OSBP2 PE=1 SV=2
1170	1751	Q92945|FUBP2_HUMAN	51.38	2	0	0	2	0	2	2			168		128	177	1	1	0	0	1	0	1	1	Phosphorylation (STY)	73115	Far upstream element-binding protein 2 OS=Homo sapiens OX=9606 GN=KHSRP PE=1 SV=4
997	2105	O00203|AP3B1_HUMAN	51.23	2	2	0	1	1	1	1	33		42.7	88.6	169	305	2	2	1	0	2	2	2	1	Acetylation (Protein N-term); Phosphorylation (STY)	121320	AP-3 complex subunit beta-1 OS=Homo sapiens OX=9606 GN=AP3B1 PE=1 SV=3
1537	1334	Q15648|MED1_HUMAN	51.14	6	1	0	0	0	5	2	583				292	581	5	5	1	0	0	0	4	2	Oxidation (M); Acetylation (Protein N-term); Phosphorylation (STY)	168477	Mediator of RNA polymerase II transcription subunit 1 OS=Homo sapiens OX=9606 GN=MED1 PE=1 SV=4
1314	1166	O95622|ADCY5_HUMAN	51.01	2	1	2	1	0	0	1	0	0	0			0	2	2	1	3	1	0	0	1	Phosphorylation (STY)	138907	Adenylate cyclase type 5 OS=Homo sapiens OX=9606 GN=ADCY5 PE=1 SV=3
925	2456	Q9HC56|PCDH9_HUMAN	50.84	2	2	2	0	0	0	2	0	0				77.3	1	1	4	2	0	0	0	2	Phosphorylation (STY)	136064	Protocadherin-9 OS=Homo sapiens OX=9606 GN=PCDH9 PE=1 SV=2
1539	1833	P25490|TYY1_HUMAN	50.82	12	0	0	5	0	7	7			775		65.3	53.8	2	2	0	0	1	0	1	1	Phosphorylation (STY)	44713	Transcriptional repressor protein YY1 OS=Homo sapiens OX=9606 GN=YY1 PE=1 SV=2
1541	1025	Q15424|SAFB1_HUMAN	50.65	13	0	0	0	0	12	2					128	27.1	6	6	0	0	0	0	6	1	Carbamidomethylation; Oxidation (M); Acetylation (Protein N-term); Phosphorylation (STY)	102642	Scaffold attachment factor B1 OS=Homo sapiens OX=9606 GN=SAFB PE=1 SV=4
840	3297	Q8IY67|RAVR1_HUMAN	50.62	2	0	0	2	2	2	2			549	369	892	821	1	1	0	0	5	4	5	4	Acetylation (Protein N-term); Phosphorylation (STY)	63877	Ribonucleoprotein PTB-binding 1 OS=Homo sapiens OX=9606 GN=RAVER1 PE=1 SV=1
1132	2878	Q6ZRI8|RHG36_HUMAN	50.61	3	0	0	0	0	3	3					72.2	78.9	1	1	0	0	0	0	2	2	Phosphorylation (STY)	61664	Rho GTPase-activating protein 36 OS=Homo sapiens OX=9606 GN=ARHGAP36 PE=2 SV=1
1726	2823	A0A075B6I4|LVX54_HUMAN	50.6	9	0	9	0	9	0	9		0		194		250	1	1	0	1	0	2	0	1	Phosphorylation (STY)	12395	Immunoglobulin lambda variable 10-54 OS=Homo sapiens OX=9606 GN=IGLV10-54 PE=3 SV=1
1299	1115	P40818|UBP8_HUMAN	50.52	2	0	0	0	0	2	1					104	0	2	2	0	0	0	0	2	1	Carbamidomethylation; Phosphorylation (STY)	127523	Ubiquitin carboxyl-terminal hydrolase 8 OS=Homo sapiens OX=9606 GN=USP8 PE=1 SV=1
1642	1760	Q8NFZ4|NLGN2_HUMAN	50.39	4	0	0	0	4	0	0				346			2	2	0	0	0	2	0	0	Phosphorylation (STY)	90820	Neuroligin-2 OS=Homo sapiens OX=9606 GN=NLGN2 PE=1 SV=1
1637	1399	P78344|IF4G2_HUMAN	50.33	8	0	3	4	0	2	0		0	68.6		84		3	3	0	1	1	0	1	0	Acetylation (Protein N-term); Phosphorylation (STY)	102362	Eukaryotic translation initiation factor 4 gamma 2 OS=Homo sapiens OX=9606 GN=EIF4G2 PE=1 SV=1
1666	1405	Q86YS7|C2CD5_HUMAN	50.26	5	0	3	0	0	2	2		170			19.2	189	2	2	0	1	0	0	1	1	Carbamidomethylation; Phosphorylation (STY)	110447	C2 domain-containing protein 5 OS=Homo sapiens OX=9606 GN=C2CD5 PE=1 SV=1
778	1990	O43915|VEGFD_HUMAN	50.16	6	3	3	3	3	0	6	0	0	179	176		243	2	2	1	2	2	1	0	5	Phosphorylation (STY)	40444	Vascular endothelial growth factor D OS=Homo sapiens OX=9606 GN=VEGFD PE=1 SV=1
1166	1834	Q9UKA4|AKA11_HUMAN	49.98	2	0	0	0	1	1	0				0	231		2	2	0	0	0	1	3	0	Phosphorylation (STY)	210511	A-kinase anchor protein 11 OS=Homo sapiens OX=9606 GN=AKAP11 PE=1 SV=1
913	1060	Q15057|ACAP2_HUMAN	49.9	8	1	3	0	3	4	2	177	360		3350	439	284	5	5	1	2	0	2	6	3	Phosphorylation (STY)	88029	Arf-GAP with coiled-coil ANK repeat and PH domain-containing protein 2 OS=Homo sapiens OX=9606 GN=ACAP2 PE=1 SV=3
1350	2287	Q13043|STK4_HUMAN	49.89	5	0	0	5	5	5	5			0	21.9	0	26.1	1	1	0	0	1	1	2	1	Phosphorylation (STY)	55630	Serine/threonine-protein kinase 4 OS=Homo sapiens OX=9606 GN=STK4 PE=1 SV=2
1761	2138	Q8NCE2|MTMRE_HUMAN	49.77	6	4	0	0	0	0	3	0					0	2	2	1	0	0	0	0	1	Carbamidomethylation; Phosphorylation (STY)	72203	Myotubularin-related protein 14 OS=Homo sapiens OX=9606 GN=MTMR14 PE=1 SV=2
1058	1725	Q15746|MYLK_HUMAN	49.71	6	1	1	2	0	2	3	31.3	0	2050		0	49.5	4	4	1	3	1	0	1	2	Carbamidomethylation; Oxidation (M); Acetylation (Protein N-term); Phosphorylation (STY)	210713	Myosin light chain kinase smooth muscle OS=Homo sapiens OX=9606 GN=MYLK PE=1 SV=4
1167	1891	Q9UPU7|TBD2B_HUMAN	49.64	4	0	2	2	0	2	4		907	17.5		48.2	2400	3	3	0	1	1	0	1	3	Acetylation (Protein N-term); Phosphorylation (STY)	109880	TBC1 domain family member 2B OS=Homo sapiens OX=9606 GN=TBC1D2B PE=1 SV=2
1692	1562	P24723|KPCL_HUMAN	49.42	2	0	0	0	0	2	0					30.3		1	1	0	0	0	0	1	0	Phosphorylation (STY)	77829	Protein kinase C eta type OS=Homo sapiens OX=9606 GN=PRKCH PE=1 SV=4
1567	1848	O60271|JIP4_HUMAN	49.42	3	0	0	1	0	0	2			504			8.31	2	2	0	0	1	0	0	1	Phosphorylation (STY)	146205	C-Jun-amino-terminal kinase-interacting protein 4 OS=Homo sapiens OX=9606 GN=SPAG9 PE=1 SV=4
1616	2208	Q8NCW6|GLT11_HUMAN	49.23	5	2	3	3	0	0	2	564	0	36.4			0	2	2	1	1	2	0	0	1	Phosphorylation (STY)	68919	Polypeptide N-acetylgalactosaminyltransferase 11 OS=Homo sapiens OX=9606 GN=GALNT11 PE=1 SV=2
1407	3014	Q6QNY0|BL1S3_HUMAN	49.18	11	0	0	0	0	11	11					158	134	1	1	0	0	0	0	1	3	Phosphorylation (STY)	21256	Biogenesis of lysosome-related organelles complex 1 subunit 3 OS=Homo sapiens OX=9606 GN=BLOC1S3 PE=1 SV=1
1017	1911	Q96DZ5|CLIP3_HUMAN	49.16	2	2	2	2	0	0	0	211	70.1	64.4				1	1	2	2	1	0	0	0	Phosphorylation (STY)	59560	CAP-Gly domain-containing linker protein 3 OS=Homo sapiens OX=9606 GN=CLIP3 PE=1 SV=3
1312	1139	Q14C86|GAPD1_HUMAN	48.98	4	1	1	0	0	0	4	0	87				1320	3	3	1	2	0	0	0	6	Phosphorylation (STY)	164979	GTPase-activating protein and VPS9 domain-containing protein 1 OS=Homo sapiens OX=9606 GN=GAPVD1 PE=1 SV=2
1210	3310	P08476|INHBA_HUMAN	48.96	4	4	4	0	4	0	0	239	120		107			1	1	4	1	0	1	0	0	Phosphorylation (STY)	47442	Inhibin beta A chain OS=Homo sapiens OX=9606 GN=INHBA PE=1 SV=2
1146	991	Q9C0B5|ZDHC5_HUMAN	48.96	9	6	6	5	5	5	9	887	630	1730	193	1170	1680	4	4	6	5	2	3	4	5	Phosphorylation (STY)	77545	Palmitoyltransferase ZDHHC5 OS=Homo sapiens OX=9606 GN=ZDHHC5 PE=1 SV=2
1104	1677	P49915|GUAA_HUMAN	48.95	4	0	0	0	3	0	2				59		54.7	2	2	0	0	0	1	0	5	Carbamidomethylation; Acetylation (Protein N-term); Phosphorylation (STY)	76716	GMP synthase [glutamine-hydrolyzing] OS=Homo sapiens OX=9606 GN=GMPS PE=1 SV=1
1018	1935	P08913|ADA2A_HUMAN	48.92	3	3	3	3	3	3	3	96.6	92.9	85	0	91.2	76	1	1	1	1	2	2	1	2	Phosphorylation (STY)	48957	Alpha-2A adrenergic receptor OS=Homo sapiens OX=9606 GN=ADRA2A PE=1 SV=3
1376	2055	P52594|AGFG1_HUMAN	48.82	2	0	0	2	0	2	2			11.7		183	228	1	1	0	0	1	0	1	1	Phosphorylation (STY)	58260	Arf-GAP domain and FG repeat-containing protein 1 OS=Homo sapiens OX=9606 GN=AGFG1 PE=1 SV=2
1420	3063	Q9P2A4|ABI3_HUMAN	48.82	7	7	0	7	0	0	7	0		0			50.2	1	1	1	0	1	0	0	2	Carbamidomethylation; Phosphorylation (STY)	39035	ABI gene family member 3 OS=Homo sapiens OX=9606 GN=ABI3 PE=1 SV=2
556	2267	I3L3R5|CCER2_HUMAN	48.63	14	14	14	14	13	6	14	1570	1800	1050	1450	1430	1460	3	3	8	8	5	5	5	5	Carbamidomethylation; Phosphorylation (STY)	30352	Coiled-coil domain-containing glutamate-rich protein 2 OS=Homo sapiens OX=9606 GN=CCER2 PE=2 SV=1
1218	2782	Q14289|FAK2_HUMAN	48.53	1	0	0	0	0	1	1					0	0	1	1	0	0	0	0	1	2	Phosphorylation (STY)	115875	Protein-tyrosine kinase 2-beta OS=Homo sapiens OX=9606 GN=PTK2B PE=1 SV=2
741	2725	P02776|PLF4_HUMAN	48.52	17	9	17	9	9	9	9	448	58.2	0	276	1080	473	2	2	5	2	2	2	3	3	Acetylation (Protein N-term); Phosphorylation (STY)	10845	Platelet factor 4 OS=Homo sapiens OX=9606 GN=PF4 PE=1 SV=2
741	2726	P10720|PF4V_HUMAN	48.52	16	9	16	9	9	9	9	448	58.2	0	276	1080	473	2	2	5	2	2	2	3	3	Acetylation (Protein N-term); Phosphorylation (STY)	11553	Platelet factor 4 variant OS=Homo sapiens OX=9606 GN=PF4V1 PE=1 SV=1
1721	2592	Q15124|PGM5_HUMAN	48.39	4	0	0	0	4	0	0				112			1	1	0	0	0	2	0	0	Carbamidomethylation; Phosphorylation (STY)	62225	Phosphoglucomutase-like protein 5 OS=Homo sapiens OX=9606 GN=PGM5 PE=1 SV=2
1268	979	Q9UKZ4|TEN1_HUMAN	48.35	4	1	1	2	1	0	1	11.4	1140	1210	7150	36.3	0	7	7	2	3	3	2	3	3	Oxidation (M); Acetylation (Protein N-term); Phosphorylation (STY)	305010	Teneurin-1 OS=Homo sapiens OX=9606 GN=TENM1 PE=1 SV=2
762	2198	O14525|ASTN1_HUMAN	48.11	1	1	1	1	1	1	1	845	878	312	756	921	851	1	1	2	2	1	2	2	3	Phosphorylation (STY)	144913	Astrotactin-1 OS=Homo sapiens OX=9606 GN=ASTN1 PE=2 SV=3
1415	2540	Q8TAD8|SNIP1_HUMAN	48.05	4	0	0	0	0	4	4					0	45.9	1	1	0	0	0	0	1	2	Phosphorylation (STY)	45778	Smad nuclear-interacting protein 1 OS=Homo sapiens OX=9606 GN=SNIP1 PE=1 SV=1
1213	1630	P14866|HNRPL_HUMAN	47.98	10	0	0	2	0	7	4			0		0	0	3	3	0	0	1	0	3	1	Oxidation (M); Acetylation (Protein N-term); Phosphorylation (STY)	64133	Heterogeneous nuclear ribonucleoprotein L OS=Homo sapiens OX=9606 GN=HNRNPL PE=1 SV=2
1048	1161	O00555|CAC1A_HUMAN	47.96	2	0	1	1	0	1	1		35.6	0	267	0	2240	4	4	0	3	1	1	1	2	Acetylation (Protein N-term); Phosphorylation (STY)	282563	Voltage-dependent P/Q-type calcium channel subunit alpha-1A OS=Homo sapiens OX=9606 GN=CACNA1A PE=1 SV=3
1421	3093	Q9Y2X3|NOP58_HUMAN	47.86	4	0	0	0	0	4	4					88.2	93.3	1	1	0	0	0	0	1	1	Carbamidomethylation; Phosphorylation (STY)	59578	Nucleolar protein 58 OS=Homo sapiens OX=9606 GN=NOP58 PE=1 SV=1
1531	1559	O75173|ATS4_HUMAN	47.82	6	5	0	0	2	0	0	0			80.9			2	2	1	0	0	1	0	0	Carbamidomethylation; Phosphorylation (STY)	90197	A disintegrin and metalloproteinase with thrombospondin motifs 4 OS=Homo sapiens OX=9606 GN=ADAMTS4 PE=1 SV=3
1224	2270	P13489|RINI_HUMAN	47.74	4	4	4	0	0	0	0	88.9	102					1	1	1	2	0	0	0	0	Carbamidomethylation; Acetylation (Protein N-term); Phosphorylation (STY)	49974	Ribonuclease inhibitor OS=Homo sapiens OX=9606 GN=RNH1 PE=1 SV=2
1175	2117	P50570|DYN2_HUMAN	47.68	4	0	0	0	4	4	4				42.1	113	0	1	1	0	0	0	1	3	2	Phosphorylation (STY)	98064	Dynamin-2 OS=Homo sapiens OX=9606 GN=DNM2 PE=1 SV=2
1253	3312	P31943|HNRH1_HUMAN	47.52	4	0	0	4	0	4	4			104		214	237	1	1	0	0	1	0	1	1	Phosphorylation (STY)	49229	Heterogeneous nuclear ribonucleoprotein H OS=Homo sapiens OX=9606 GN=HNRNPH1 PE=1 SV=4
1387	1720	P11362|FGFR1_HUMAN	47.37	2	0	0	0	2	0	0				29.2			2	2	0	0	0	3	0	0	Phosphorylation (STY)	91868	Fibroblast growth factor receptor 1 OS=Homo sapiens OX=9606 GN=FGFR1 PE=1 SV=3
1225	2479	Q8N1G4|LRC47_HUMAN	47.31	5	0	0	0	0	5	5					77.3	73.6	1	1	0	0	0	0	2	1	Phosphorylation (STY)	63473	Leucine-rich repeat-containing protein 47 OS=Homo sapiens OX=9606 GN=LRRC47 PE=1 SV=1
1411	2158	O60502|OGA_HUMAN	47.19	3	0	0	0	0	3	3					0	53	1	1	0	0	0	0	1	1	Phosphorylation (STY)	102915	Protein O-GlcNAcase OS=Homo sapiens OX=9606 GN=OGA PE=1 SV=2
1185	1521	P98171|RHG04_HUMAN	47.04	3	0	0	0	0	3	2					64.7	123	2	2	0	0	0	0	4	2	Acetylation (Protein N-term); Phosphorylation (STY)	105026	Rho GTPase-activating protein 4 OS=Homo sapiens OX=9606 GN=ARHGAP4 PE=1 SV=2
1644	2269	Q8TD55|PKHO2_HUMAN	46.96	2	0	2	0	2	0	0		0		278			1	1	0	1	0	1	0	0	Phosphorylation (STY)	53350	Pleckstrin homology domain-containing family O member 2 OS=Homo sapiens OX=9606 GN=PLEKHO2 PE=1 SV=1
1318	1955	Q9HCD5|NCOA5_HUMAN	46.94	4	0	0	2	2	2	4			25.5	1220	115	208	2	2	0	0	1	1	1	3	Acetylation (Protein N-term); Phosphorylation (STY)	65536	Nuclear receptor coactivator 5 OS=Homo sapiens OX=9606 GN=NCOA5 PE=1 SV=2
952	2400	Q96NN9|AIFM3_HUMAN	46.92	5	2	2	2	5	2	2	145	58.3	82	29.9	85.3	104	2	2	1	4	1	2	1	2	Oxidation (M); Phosphorylation (STY)	66791	Apoptosis-inducing factor 3 OS=Homo sapiens OX=9606 GN=AIFM3 PE=1 SV=1
1288	2073	P11831|SRF_HUMAN	46.85	9	0	0	0	0	9	5					589	552	2	2	0	0	0	0	3	1	Carbamidomethylation; Phosphorylation (STY)	51593	Serum response factor OS=Homo sapiens OX=9606 GN=SRF PE=1 SV=1
1832	3313	Q9HB19|PKHA2_HUMAN	46.71	3	0	0	0	0	3	0					0		1	1	0	0	0	0	1	0	Carbamidomethylation; Phosphorylation (STY)	47255	Pleckstrin homology domain-containing family A member 2 OS=Homo sapiens OX=9606 GN=PLEKHA2 PE=1 SV=2
1316	2520	P05455|LA_HUMAN	46.69	5	0	0	5	5	5	5			139	117	199	443	2	2	0	0	1	1	2	2	Phosphorylation (STY)	46837	Lupus La protein OS=Homo sapiens OX=9606 GN=SSB PE=1 SV=2
1549	1435	Q12873|CHD3_HUMAN	46.68	1	0	0	0	0	1	1					0	43.5	2	1	0	0	0	1	1	1	Phosphorylation (STY)	226590	Chromodomain-helicase-DNA-binding protein 3 OS=Homo sapiens OX=9606 GN=CHD3 PE=1 SV=3
1237	3133	Q9HBJ8|CLTRN_HUMAN	46.61	6	6	6	0	0	6	6	0	130			0	173	1	1	1	1	0	0	1	2	Phosphorylation (STY)	25235	Collectrin OS=Homo sapiens OX=9606 GN=CLTRN PE=1 SV=1
1529	1046	P0DOX4|IGE_HUMAN	46.32	8	3	0	5	2	0	0	38.3		541	9980			4	4	1	0	2	1	0	0	Carbamidomethylation; Acetylation (Protein N-term); Phosphorylation (STY)	60323	Immunoglobulin epsilon heavy chain OS=Homo sapiens OX=9606 PE=1 SV=1
1529	1823	P01854|IGHE_HUMAN	46.32	6	0	0	3	3	0	0			78.2	9980			2	2	0	0	1	1	0	0	Carbamidomethylation; Acetylation (Protein N-term); Phosphorylation (STY)	47019	Immunoglobulin heavy constant epsilon OS=Homo sapiens OX=9606 GN=IGHE PE=1 SV=1
481	2723	Q8WW12|PCNP_HUMAN	46.3	13	13	13	13	13	13	13	35.4	24.3	588	320	538	444	1	1	4	1	6	4	12	13	Oxidation (M); Phosphorylation (STY)	18925	PEST proteolytic signal-containing nuclear protein OS=Homo sapiens OX=9606 GN=PCNP PE=1 SV=2
1779	3324	Q9Y365|STA10_HUMAN	46.29	5	5	0	0	0	0	0	163						1	1	2	0	0	0	0	0	Phosphorylation (STY)	33049	START domain-containing protein 10 OS=Homo sapiens OX=9606 GN=STARD10 PE=1 SV=2
1374	1923	O75363|BCAS1_HUMAN	46.25	6	0	0	0	0	6	0					261		2	2	0	0	0	0	3	0	Phosphorylation (STY)	61709	Breast carcinoma-amplified sequence 1 OS=Homo sapiens OX=9606 GN=BCAS1 PE=1 SV=2
877	2018	O15075|DCLK1_HUMAN	46.25	2	2	2	2	2	2	2	150	168	78.4	87.6	300	128	1	1	2	2	1	3	2	1	Phosphorylation (STY)	82224	Serine/threonine-protein kinase DCLK1 OS=Homo sapiens OX=9606 GN=DCLK1 PE=1 SV=2
1731	3322	P24534|EF1B_HUMAN	46.11	17	0	0	0	0	17	17					0	885	1	1	0	0	0	0	1	1	Phosphorylation (STY)	24764	Elongation factor 1-beta OS=Homo sapiens OX=9606 GN=EEF1B2 PE=1 SV=3
1756	3243	Q9H0C8|ILKAP_HUMAN	45.95	5	0	0	0	0	5	5					22.3	21.1	1	1	0	0	0	0	2	2	Acetylation (Protein N-term); Phosphorylation (STY)	42907	Integrin-linked kinase-associated serine/threonine phosphatase 2C OS=Homo sapiens OX=9606 GN=ILKAP PE=1 SV=1
1046	1182	Q96BY6|DOC10_HUMAN	45.88	3	0	0	1	2	0	0			65.5	0	129	0	4	3	0	0	2	2	2	2	Acetylation (Protein N-term); Phosphorylation (STY)	249529	Dedicator of cytokinesis protein 10 OS=Homo sapiens OX=9606 GN=DOCK10 PE=1 SV=3
1214	1765	A2RU30|TESP1_HUMAN	45.82	4	0	0	2	2	0	0			42.4	88.7			2	2	0	0	4	1	0	0	Carbamidomethylation; Oxidation (M); Acetylation (Protein N-term); Phosphorylation (STY)	59213	Protein TESPA1 OS=Homo sapiens OX=9606 GN=TESPA1 PE=1 SV=2
1778	3219	P49023|PAXI_HUMAN	45.77	3	0	0	0	0	3	0					0		1	1	0	0	0	0	1	0	Phosphorylation (STY)	64505	Paxillin OS=Homo sapiens OX=9606 GN=PXN PE=1 SV=3
1586	1136	O60231|DHX16_HUMAN	45.76	2	0	0	0	0	1	2					0	46	2	2	0	0	0	0	1	2	Acetylation (Protein N-term); Phosphorylation (STY)	119263	Pre-mRNA-splicing factor ATP-dependent RNA helicase DHX16 OS=Homo sapiens OX=9606 GN=DHX16 PE=1 SV=2
1279	1417	P07814|SYEP_HUMAN	45.72	3	0	0	2	3	0	2			50.7	207		98.3	2	2	0	0	1	2	0	1	Carbamidomethylation; Phosphorylation (STY)	170590	Bifunctional glutamate/proline--tRNA ligase OS=Homo sapiens OX=9606 GN=EPRS PE=1 SV=5
1021	2476	P40123|CAP2_HUMAN	45.66	2	0	2	0	0	0	0		0					1	1	0	6	0	0	0	0	Phosphorylation (STY)	52824	Adenylyl cyclase-associated protein 2 OS=Homo sapiens OX=9606 GN=CAP2 PE=1 SV=1
1620	1241	Q8TB72|PUM2_HUMAN	45.61	2	0	0	0	1	1	0				0	30.6		2	2	0	0	0	1	1	0	Oxidation (M); Phosphorylation (STY)	114216	Pumilio homolog 2 OS=Homo sapiens OX=9606 GN=PUM2 PE=1 SV=2
1326	1582	Q9NZM3|ITSN2_HUMAN	45.58	3	1	1	0	0	1	1	0	2810			0	0	3	3	1	1	0	0	1	1	Phosphorylation (STY)	193460	Intersectin-2 OS=Homo sapiens OX=9606 GN=ITSN2 PE=1 SV=3
1413	2362	Q96TA1|NIBA2_HUMAN	45.55	3	3	0	0	0	0	0	134						1	1	2	0	0	0	0	0	Phosphorylation (STY)	84138	Protein Niban 2 OS=Homo sapiens OX=9606 GN=NIBAN2 PE=1 SV=3
1248	3339	Q9H313|TTYH1_HUMAN	45.49	2	2	0	2	0	0	2	54		180			154	1	1	3	0	1	0	0	1	Phosphorylation (STY)	49051	Protein tweety homolog 1 OS=Homo sapiens OX=9606 GN=TTYH1 PE=1 SV=1
1273	1816	P42858|HD_HUMAN	45.41	1	0	0	1	0	0	1			0			166	2	2	0	0	1	0	0	3	Phosphorylation (STY)	347603	Huntingtin OS=Homo sapiens OX=9606 GN=HTT PE=1 SV=2
1723	2727	Q9UQN3|CHM2B_HUMAN	45.33	5	0	0	0	0	5	0					32.1		1	1	0	0	0	0	1	0	Phosphorylation (STY)	23907	Charged multivesicular body protein 2b OS=Homo sapiens OX=9606 GN=CHMP2B PE=1 SV=1
1337	1554	P35221|CTNA1_HUMAN	44.97	4	0	1	0	0	2	3		0			10.6	107	3	3	0	1	0	0	1	2	Phosphorylation (STY)	100071	Catenin alpha-1 OS=Homo sapiens OX=9606 GN=CTNNA1 PE=1 SV=1
946	1644	Q6U841|S4A10_HUMAN	44.97	4	3	1	0	2	0	1	116	0		77.8		107	3	2	2	1	0	4	0	3	Carbamidomethylation; Oxidation (M); Phosphorylation (STY)	125946	Sodium-driven chloride bicarbonate exchanger OS=Homo sapiens OX=9606 GN=SLC4A10 PE=1 SV=1
608	2817	P61328|FGF12_HUMAN	44.96	4	4	4	4	4	4	4	1320	1120	1010	789	724	1030	1	1	4	3	6	2	2	4	Phosphorylation (STY)	27399	Fibroblast growth factor 12 OS=Homo sapiens OX=9606 GN=FGF12 PE=1 SV=1
1412	2342	Q9UPN7|PP6R1_HUMAN	44.94	3	0	0	0	0	3	3					0	0	1	1	0	0	0	0	1	2	Phosphorylation (STY)	96724	Serine/threonine-protein phosphatase 6 regulatory subunit 1 OS=Homo sapiens OX=9606 GN=PPP6R1 PE=1 SV=5
847	2615	Q6UXF1|TM108_HUMAN	44.85	3	3	3	3	0	0	3	0	0	130			160	1	1	4	3	3	0	0	2	Phosphorylation (STY)	59948	Transmembrane protein 108 OS=Homo sapiens OX=9606 GN=TMEM108 PE=2 SV=2
1353	2002	Q9H6S3|ES8L2_HUMAN	44.54	2	1	0	1	0	0	1	0		0			65.1	2	2	1	0	1	0	0	2	Phosphorylation (STY)	80621	Epidermal growth factor receptor kinase substrate 8-like protein 2 OS=Homo sapiens OX=9606 GN=EPS8L2 PE=1 SV=2
1342	2980	O75351|VPS4B_HUMAN	44.42	4	0	0	0	0	4	4					0	143	1	1	0	0	0	0	5	4	Phosphorylation (STY)	49302	Vacuolar protein sorting-associated protein 4B OS=Homo sapiens OX=9606 GN=VPS4B PE=1 SV=2
1809	3077	Q99607|ELF4_HUMAN	44.28	2	0	0	0	0	2	0					45.3		1	1	0	0	0	0	1	0	Phosphorylation (STY)	70730	ETS-related transcription factor Elf-4 OS=Homo sapiens OX=9606 GN=ELF4 PE=1 SV=1
1195	2341	Q7L4I2|RSRC2_HUMAN	44.21	2	0	0	2	2	2	2			117	0	273	269	1	1	0	0	1	1	1	1	Phosphorylation (STY)	50560	Arginine/serine-rich coiled-coil protein 2 OS=Homo sapiens OX=9606 GN=RSRC2 PE=1 SV=1
1513	947	Q8WXX0|DYH7_HUMAN	44.18	2	0	0	1	0	0	1	35.3		36.2	18.4		52.9	5	5	1	0	2	1	0	2	Oxidation (M); Phosphorylation (STY)	461163	Dynein heavy chain 7 axonemal OS=Homo sapiens OX=9606 GN=DNAH7 PE=1 SV=2
1336	1525	Q7Z5L9|I2BP2_HUMAN	43.98	5	0	0	0	0	5	5					0	19.2	2	2	0	0	0	0	2	2	Phosphorylation (STY)	61025	Interferon regulatory factor 2-binding protein 2 OS=Homo sapiens OX=9606 GN=IRF2BP2 PE=1 SV=2
1600	1054	Q9BXP5|SRRT_HUMAN	43.96	7	0	1	0	0	7	2		0			436	0	4	4	0	1	0	0	4	1	Acetylation (Protein N-term); Phosphorylation (STY)	100667	Serrate RNA effector molecule homolog OS=Homo sapiens OX=9606 GN=SRRT PE=1 SV=1
1042	994	Q6KC79|NIPBL_HUMAN	43.85	2	0	0	1	0	1	1	4240		6110	23.5	5960	152	4	4	1	0	3	1	3	4	Carbamidomethylation; Oxidation (M); Acetylation (Protein N-term); Phosphorylation (STY)	316051	Nipped-B-like protein OS=Homo sapiens OX=9606 GN=NIPBL PE=1 SV=2
990	1732	Q9UBV2|SE1L1_HUMAN	43.83	4	1	1	1	1	1	4	309	240	0	182	0	3450	2	2	1	1	2	1	1	3	Oxidation (M); Phosphorylation (STY)	88755	Protein sel-1 homolog 1 OS=Homo sapiens OX=9606 GN=SEL1L PE=1 SV=3
1093	2483	P09601|HMOX1_HUMAN	43.76	4	0	4	4	4	4	4		0	354	220	0	728	1	1	0	1	1	2	1	2	Phosphorylation (STY)	32819	Heme oxygenase 1 OS=Homo sapiens OX=9606 GN=HMOX1 PE=1 SV=1
1796	2739	Q96D96|HVCN1_HUMAN	43.65	9	0	9	0	0	0	0		0					1	1	0	1	0	0	0	0	Phosphorylation (STY)	31683	Voltage-gated hydrogen channel 1 OS=Homo sapiens OX=9606 GN=HVCN1 PE=1 SV=1
881	1941	Q9NQC3|RTN4_HUMAN	43.58	2	0	0	0	2	2	2				40.6	48.8	102	1	1	0	0	0	2	4	2	Acetylation (Protein N-term); Phosphorylation (STY)	129931	Reticulon-4 OS=Homo sapiens OX=9606 GN=RTN4 PE=1 SV=2
1122	3123	P00352|AL1A1_HUMAN	43.42	3	3	3	3	0	0	0	0	23.9	0				1	1	1	2	1	0	0	0	Acetylation (Protein N-term); Phosphorylation (STY)	54862	Retinal dehydrogenase 1 OS=Homo sapiens OX=9606 GN=ALDH1A1 PE=1 SV=2
1049	1352	Q76M96|CCD80_HUMAN	43.06	2	1	1	1	1	1	1	249	137	219	0	230	317	2	2	1	2	1	1	1	1	Acetylation (Protein N-term); Phosphorylation (STY)	108174	Coiled-coil domain-containing protein 80 OS=Homo sapiens OX=9606 GN=CCDC80 PE=1 SV=1
1607	1925	Q9C0I1|MTMRC_HUMAN	42.88	3	0	0	0	1	1	1				1440	0	0	2	2	0	0	0	1	2	1	Phosphorylation (STY)	86148	Myotubularin-related protein 12 OS=Homo sapiens OX=9606 GN=MTMR12 PE=1 SV=2
1708	1518	Q13586|STIM1_HUMAN	42.85	4	0	0	0	0	4	0					28.2		2	2	0	0	0	0	2	0	Phosphorylation (STY)	77423	Stromal interaction molecule 1 OS=Homo sapiens OX=9606 GN=STIM1 PE=1 SV=3
1301	1665	Q13247|SRSF6_HUMAN	42.73	3	0	0	0	0	0	3						482	1	1	0	0	0	0	0	2	Phosphorylation (STY)	39587	Serine/arginine-rich splicing factor 6 OS=Homo sapiens OX=9606 GN=SRSF6 PE=1 SV=2
1755	3212	Q6NZI2|CAVN1_HUMAN	42.7	2	0	2	0	0	2	2		0			0	78.6	1	1	0	1	0	0	2	1	Phosphorylation (STY)	43476	Caveolae-associated protein 1 OS=Homo sapiens OX=9606 GN=CAVIN1 PE=1 SV=1
1705	2887	Q92934|BAD_HUMAN	42.69	7	0	0	0	0	0	7						0	1	1	0	0	0	0	0	1	Phosphorylation (STY)	18392	Bcl2-associated agonist of cell death OS=Homo sapiens OX=9606 GN=BAD PE=1 SV=3
1686	2529	Q9UNF0|PACN2_HUMAN	42.57	8	0	0	0	0	8	8					0	0	1	1	0	0	0	0	1	1	Phosphorylation (STY)	55739	Protein kinase C and casein kinase substrate in neurons protein 2 OS=Homo sapiens OX=9606 GN=PACSIN2 PE=1 SV=2
1380	2854	P42768|WASP_HUMAN	42.43	5	0	0	5	0	5	5			0		0	148	1	1	0	0	1	0	1	2	Phosphorylation (STY)	52913	Wiskott-Aldrich syndrome protein OS=Homo sapiens OX=9606 GN=WAS PE=1 SV=4
1673	2471	Q8WV28|BLNK_HUMAN	42.38	2	0	0	0	0	2	2					0	0	1	1	0	0	0	0	1	1	Phosphorylation (STY)	50466	B-cell linker protein OS=Homo sapiens OX=9606 GN=BLNK PE=1 SV=2
1691	1510	O75427|LRCH4_HUMAN	42.36	9	0	0	0	1	5	7				0	38.4	31.6	3	3	0	0	0	2	1	2	Carbamidomethylation; Acetylation (Protein N-term); Phosphorylation (STY)	73450	Leucine-rich repeat and calponin homology domain-containing protein 4 OS=Homo sapiens OX=9606 GN=LRCH4 PE=1 SV=2
826	1676	Q8N6G6|ATL1_HUMAN	42.03	1	1	1	1	1	1	1	240	0	0	0	0	0	2	2	4	2	1	2	1	2	Phosphorylation (STY)	193408	ADAMTS-like protein 1 OS=Homo sapiens OX=9606 GN=ADAMTSL1 PE=1 SV=4
1000	2960	Q8IZP0|ABI1_HUMAN	41.94	3	3	0	3	3	3	3	17.9		60.4	138	229	263	1	1	1	0	1	2	3	5	Oxidation (M); Phosphorylation (STY)	55081	Abl interactor 1 OS=Homo sapiens OX=9606 GN=ABI1 PE=1 SV=4
1390	2310	Q02446|SP4_HUMAN	41.9	3	0	0	3	0	3	3			0		0	40.2	1	1	0	0	1	0	1	1	Phosphorylation (STY)	81985	Transcription factor Sp4 OS=Homo sapiens OX=9606 GN=SP4 PE=1 SV=2
1729	3042	Q16181|SEPT7_HUMAN	41.76	3	0	0	0	3	3	3				43.6	70.5	107	1	1	0	0	0	1	1	1	Phosphorylation (STY)	50680	Septin-7 OS=Homo sapiens OX=9606 GN=SEPTIN7 PE=1 SV=2
1381	3259	P16150|LEUK_HUMAN	41.74	3	0	0	3	0	0	3			1460			106	1	1	0	0	3	0	0	1	Oxidation (M); Phosphorylation (STY)	40322	Leukosialin OS=Homo sapiens OX=9606 GN=SPN PE=1 SV=1
1553	1232	Q9BXB4|OSB11_HUMAN	41.71	7	1	2	0	0	0	6	0	135				178	4	4	1	1	0	0	0	3	Carbamidomethylation; Acetylation (Protein N-term); Phosphorylation (STY)	83643	Oxysterol-binding protein-related protein 11 OS=Homo sapiens OX=9606 GN=OSBPL11 PE=1 SV=2
1814	3251	Q86T24|KAISO_HUMAN	41.59	5	5	0	0	0	0	0	0						1	1	1	0	0	0	0	0	Phosphorylation (STY)	74485	Transcriptional regulator Kaiso OS=Homo sapiens OX=9606 GN=ZBTB33 PE=1 SV=2
1358	3161	Q9BZZ5|API5_HUMAN	41.25	3	0	0	0	3	3	3				0	0	86.5	1	1	0	0	0	1	2	2	Phosphorylation (STY)	59005	Apoptosis inhibitor 5 OS=Homo sapiens OX=9606 GN=API5 PE=1 SV=3
1416	2546	A4D0V7|CPED1_HUMAN	41.12	1	1	0	0	0	0	1	0					65	1	1	1	0	0	0	0	1	Carbamidomethylation; Phosphorylation (STY)	117491	Cadherin-like and PC-esterase domain-containing protein 1 OS=Homo sapiens OX=9606 GN=CPED1 PE=2 SV=1
1276	1459	O60242|AGRB3_HUMAN	41.07	3	1	1	1	1	1	2	551	0	0	93	0	15.3	2	2	3	3	1	1	2	1	Carbamidomethylation; Oxidation (M); Phosphorylation (STY)	171517	Adhesion G protein-coupled receptor B3 OS=Homo sapiens OX=9606 GN=ADGRB3 PE=1 SV=2
1663	2345	Q6ZNB6|NFXL1_HUMAN	40.95	6	6	0	0	0	0	0	0						1	1	1	0	0	0	0	0	Carbamidomethylation; Acetylation (Protein N-term); Phosphorylation (STY)	101339	NF-X1-type zinc finger protein NFXL1 OS=Homo sapiens OX=9606 GN=NFXL1 PE=1 SV=2
1789	2016	Q8N122|RPTOR_HUMAN	40.94	5	0	0	0	0	3	1					0	0	2	2	0	0	0	0	1	1	Carbamidomethylation; Acetylation (Protein N-term); Phosphorylation (STY)	149037	Regulatory-associated protein of mTOR OS=Homo sapiens OX=9606 GN=RPTOR PE=1 SV=1
1304	982	Q6WKZ4|RFIP1_HUMAN	40.93	5	0	1	0	4	2	0		596		235	88.1		3	3	0	1	0	2	3	0	Phosphorylation (STY)	137167	Rab11 family-interacting protein 1 OS=Homo sapiens OX=9606 GN=RAB11FIP1 PE=1 SV=3
1439	3088	Q96PL5|ERMAP_HUMAN	40.92	5	0	5	0	0	0	5		222				543	1	1	0	1	0	0	0	1	Carbamidomethylation; Phosphorylation (STY)	52605	Erythroid membrane-associated protein OS=Homo sapiens OX=9606 GN=ERMAP PE=1 SV=1
1528	1727	Q8NF50|DOCK8_HUMAN	40.81	1	0	0	0	0	1	1			274		243	751	2	2	0	0	1	0	1	2	Oxidation (M); Phosphorylation (STY)	238527	Dedicator of cytokinesis protein 8 OS=Homo sapiens OX=9606 GN=DOCK8 PE=1 SV=3
1378	2411	Q13557|KCC2D_HUMAN	40.74	3	0	0	0	0	0	3						94.3	1	1	0	0	0	0	0	2	Phosphorylation (STY)	56369	Calcium/calmodulin-dependent protein kinase type II subunit delta OS=Homo sapiens OX=9606 GN=CAMK2D PE=1 SV=3
1294	1088	O95425|SVIL_HUMAN	40.73	2	0	0	0	1	1	0				543	83.3		3	3	0	0	0	1	3	0	Acetylation (Protein N-term); Phosphorylation (STY)	247744	Supervillin OS=Homo sapiens OX=9606 GN=SVIL PE=1 SV=2
1454	1470	P14616|INSRR_HUMAN	40.66	6	3	5	3	3	2	4	1500	865	8760	1450	1140	10800	4	4	4	4	10	3	4	4	Carbamidomethylation; Acetylation (Protein N-term); Phosphorylation (STY)	143720	Insulin receptor-related protein OS=Homo sapiens OX=9606 GN=INSRR PE=1 SV=2
1486	1252	Q4G0P3|HYDIN_HUMAN	40.51	1	0	0	0	0	1	1	0	30.7		1290	334	214	3	3	2	1	0	2	5	2	Oxidation (M); Acetylation (Protein N-term); Phosphorylation (STY)	575900	Hydrocephalus-inducing protein homolog OS=Homo sapiens OX=9606 GN=HYDIN PE=1 SV=3
1527	1402	O95936|EOMES_HUMAN	40.46	13	0	0	7	3	2	7			0	71.2	0	0	3	3	0	0	4	1	1	1	Carbamidomethylation; Acetylation (Protein N-term); Phosphorylation (STY)	72732	Eomesodermin homolog OS=Homo sapiens OX=9606 GN=EOMES PE=1 SV=3
1591	2112	Q9ULH1|ASAP1_HUMAN	40.43	2	0	0	0	0	0	2						43.2	2	2	0	0	0	0	0	2	Phosphorylation (STY)	125498	Arf-GAP with SH3 domain ANK repeat and PH domain-containing protein 1 OS=Homo sapiens OX=9606 GN=ASAP1 PE=1 SV=4
1598	2629	P22735|TGM1_HUMAN	40.37	3	3	3	3	3	3	3	117	50.7	273	396	235	205	1	1	2	2	1	1	1	1	Phosphorylation (STY)	89787	Protein-glutamine gamma-glutamyltransferase K OS=Homo sapiens OX=9606 GN=TGM1 PE=1 SV=4
941	2604	O94811|TPPP_HUMAN	40.31	7	7	7	7	7	7	7	0	0	0	0	0	0	1	1	3	1	3	1	1	1	Phosphorylation (STY)	23694	Tubulin polymerization-promoting protein OS=Homo sapiens OX=9606 GN=TPPP PE=1 SV=1
1501	1140	Q14204|DYHC1_HUMAN	40.28	2	0	0	0	0	1	0	0			1130	0	103	6	6	1	0	0	2	2	1	Oxidation (M); Phosphorylation (STY)	532412	Cytoplasmic dynein 1 heavy chain 1 OS=Homo sapiens OX=9606 GN=DYNC1H1 PE=1 SV=5
1291	1537	Q9NY61|AATF_HUMAN	40.24	11	4	2	2	2	9	2	143	24.1	50.7	154	64.1	182	3	3	2	1	1	3	3	2	Acetylation (Protein N-term); Phosphorylation (STY)	63133	Protein AATF OS=Homo sapiens OX=9606 GN=AATF PE=1 SV=1
1603	1236	Q13501|SQSTM_HUMAN	40.07	11	0	0	0	0	8	3					0	90.8	2	2	0	0	0	0	1	1	Phosphorylation (STY)	47687	Sequestosome-1 OS=Homo sapiens OX=9606 GN=SQSTM1 PE=1 SV=1
1362	1350	P23396|RS3_HUMAN	39.98	9	0	0	0	4	0	5				651		226	2	2	0	0	0	2	0	3	Acetylation (Protein N-term); Phosphorylation (STY)	26688	40S ribosomal protein S3 OS=Homo sapiens OX=9606 GN=RPS3 PE=1 SV=2
1657	1857	Q92835|SHIP1_HUMAN	39.9	1	0	0	0	0	0	1						52.4	1	1	0	0	0	0	0	2	Phosphorylation (STY)	133292	Phosphatidylinositol 3 4 5-trisphosphate 5-phosphatase 1 OS=Homo sapiens OX=9606 GN=INPP5D PE=1 SV=2
1440	3108	Q9BSA4|TTYH2_HUMAN	39.85	4	0	0	4	0	0	0			161				1	1	0	0	2	0	0	0	Phosphorylation (STY)	58772	Protein tweety homolog 2 OS=Homo sapiens OX=9606 GN=TTYH2 PE=1 SV=3
1667	1678	Q9NQ75|CASS4_HUMAN	39.85	4	0	0	3	1	0	0			198	77.2			3	3	0	0	4	1	0	0	Phosphorylation (STY)	87144	Cas scaffolding protein family member 4 OS=Homo sapiens OX=9606 GN=CASS4 PE=1 SV=2
1035	1138	Q9UKX3|MYH13_HUMAN	39.75	8	1	2	2	2	2	2	168	0	0	1130	0	250	10	8	1	3	2	4	2	4	Acetylation (Protein N-term); Phosphorylation (STY)	223603	Myosin-13 OS=Homo sapiens OX=9606 GN=MYH13 PE=2 SV=2
1181	3138	Q6Q788|APOA5_HUMAN	39.5	6	0	6	0	0	6	6		186			250	384	1	1	0	1	0	0	3	4	Phosphorylation (STY)	41213	Apolipoprotein A-V OS=Homo sapiens OX=9606 GN=APOA5 PE=1 SV=1
1800	2791	P21854|CD72_HUMAN	39.49	4	0	0	0	4	0	0				0			1	1	0	0	0	1	0	0	Phosphorylation (STY)	40221	B-cell differentiation antigen CD72 OS=Homo sapiens OX=9606 GN=CD72 PE=2 SV=1
1134	996	Q7Z5P9|MUC19_HUMAN	39.46	6	1	1	1	1	1	2	782	819	1940	288	1520	3290	19	19	6	3	6	3	6	8	Carbamidomethylation; Acetylation (Protein N-term); Phosphorylation (STY)	805275	Mucin-19 OS=Homo sapiens OX=9606 GN=MUC19 PE=1 SV=3
1385	1585	P35236|PTN7_HUMAN	39.36	3	0	0	0	0	3	3					309	438	1	1	0	0	0	0	1	1	Phosphorylation (STY)	40529	Tyrosine-protein phosphatase non-receptor type 7 OS=Homo sapiens OX=9606 GN=PTPN7 PE=1 SV=3
1566	1759	Q13595|TRA2A_HUMAN	39.34	16	12	0	0	4	4	4	689			0	360	464	2	2	1	0	0	3	4	2	Phosphorylation (STY)	32689	Transformer-2 protein homolog alpha OS=Homo sapiens OX=9606 GN=TRA2A PE=1 SV=1
1566	1796	P62995|TRA2B_HUMAN	39.34	8	0	0	0	3	3	8				0	360	584	2	2	0	0	0	3	4	3	Acetylation (Protein N-term); Phosphorylation (STY)	33666	Transformer-2 protein homolog beta OS=Homo sapiens OX=9606 GN=TRA2B PE=1 SV=1
1296	1223	Q9HB58|SP110_HUMAN	39.29	6	1	1	1	0	3	4	0	0	298		0	0	3	3	1	1	1	0	1	3	Carbamidomethylation; Acetylation (Protein N-term); Phosphorylation (STY)	78396	Sp110 nuclear body protein OS=Homo sapiens OX=9606 GN=SP110 PE=1 SV=5
1391	2402	Q01543|FLI1_HUMAN	39.29	3	0	0	0	0	3	0					106		1	1	0	0	0	0	2	0	Phosphorylation (STY)	50982	Friend leukemia integration 1 transcription factor OS=Homo sapiens OX=9606 GN=FLI1 PE=1 SV=1
1238	3157	P63208|SKP1_HUMAN	39.24	6	6	0	0	6	0	6	117			66.8		135	1	1	1	0	0	2	0	1	Phosphorylation (STY)	18658	S-phase kinase-associated protein 1 OS=Homo sapiens OX=9606 GN=SKP1 PE=1 SV=2
1593	1491	O95294|RASL1_HUMAN	39.16	4	2	0	3	1	0	1	8500		5260	14800		7470	3	3	2	0	2	1	0	1	Carbamidomethylation; Phosphorylation (STY)	90016	RasGAP-activating-like protein 1 OS=Homo sapiens OX=9606 GN=RASAL1 PE=1 SV=3
1271	1125	O75122|CLAP2_HUMAN	38.93	2	0	0	0	0	2	0					116		2	2	0	0	0	0	3	0	Phosphorylation (STY)	141063	CLIP-associating protein 2 OS=Homo sapiens OX=9606 GN=CLASP2 PE=1 SV=3
1315	2110	Q6PJT7|ZC3HE_HUMAN	38.84	2	0	0	0	0	2	2					107	91.5	1	1	0	0	0	0	2	1	Phosphorylation (STY)	82876	Zinc finger CCCH domain-containing protein 14 OS=Homo sapiens OX=9606 GN=ZC3H14 PE=1 SV=1
1762	2230	O75676|KS6A4_HUMAN	38.81	2	0	0	0	0	2	0					0		1	1	0	0	0	0	1	0	Phosphorylation (STY)	85606	Ribosomal protein S6 kinase alpha-4 OS=Homo sapiens OX=9606 GN=RPS6KA4 PE=1 SV=1
1683	2319	Q8TEH3|DEN1A_HUMAN	38.74	1	0	0	0	0	0	1						67.8	1	1	0	0	0	0	0	2	Phosphorylation (STY)	110577	DENN domain-containing protein 1A OS=Homo sapiens OX=9606 GN=DENND1A PE=1 SV=2
1295	1374	Q5KSL6|DGKK_HUMAN	38.72	1	1	0	1	1	1	0	1590		1420	110	1550		2	2	4	0	3	2	4	0	Phosphorylation (STY)	141829	Diacylglycerol kinase kappa OS=Homo sapiens OX=9606 GN=DGKK PE=1 SV=1
1612	1620	Q14978|NOLC1_HUMAN	38.62	5	0	0	0	5	0	0				161			2	2	0	0	0	2	0	0	Phosphorylation (STY)	73603	Nucleolar and coiled-body phosphoprotein 1 OS=Homo sapiens OX=9606 GN=NOLC1 PE=1 SV=2
1489	1656	Q6XUX3|DUSTY_HUMAN	38.6	2	2	2	2	2	2	2	2190	2050	2350	0	1630	4000	1	1	1	2	2	2	3	4	Phosphorylation (STY)	105206	Dual serine/threonine and tyrosine protein kinase OS=Homo sapiens OX=9606 GN=DSTYK PE=1 SV=2
1753	3129	P49407|ARRB1_HUMAN	38.58	4	0	0	0	4	0	4				0		67.9	1	1	0	0	0	1	0	1	Phosphorylation (STY)	47066	Beta-arrestin-1 OS=Homo sapiens OX=9606 GN=ARRB1 PE=1 SV=2
1562	1360	Q9Y6X9|MORC2_HUMAN	38.49	4	0	2	0	3	1	0		0		9600	0		3	3	0	1	0	2	1	0	Phosphorylation (STY)	117823	ATPase MORC2 OS=Homo sapiens OX=9606 GN=MORC2 PE=1 SV=2
539	1120	Q6Q759|SPG17_HUMAN	38.48	2	1	2	1	1	1	1	19900	18900	22200	38700	23300	30300	3	3	14	16	12	36	15	25	Carbamidomethylation; Acetylation (Protein N-term); Phosphorylation (STY)	251739	Sperm-associated antigen 17 OS=Homo sapiens OX=9606 GN=SPAG17 PE=2 SV=1
1284	2348	Q9P107|GMIP_HUMAN	38.44	4	2	0	0	0	1	1	1550				62.6	65.7	2	2	2	0	0	0	1	2	Acetylation (Protein N-term); Phosphorylation (STY)	106683	GEM-interacting protein OS=Homo sapiens OX=9606 GN=GMIP PE=1 SV=2
1542	1400	Q8NI08|NCOA7_HUMAN	38.42	4	1	1	0	1	2	0	1410	506		0	0		3	3	1	2	0	1	1	0	Phosphorylation (STY)	106162	Nuclear receptor coactivator 7 OS=Homo sapiens OX=9606 GN=NCOA7 PE=1 SV=2
1628	1230	P24928|RPB1_HUMAN	38.35	2	0	1	0	0	1	1		335			82.3	23.2	3	3	0	1	0	0	1	2	Phosphorylation (STY)	217174	DNA-directed RNA polymerase II subunit RPB1 OS=Homo sapiens OX=9606 GN=POLR2A PE=1 SV=2
1145	1547	Q96E39|RMXL1_HUMAN	38.31	4	0	0	4	4	4	4			154	206	503	386	1	1	0	0	1	1	3	1	Phosphorylation (STY)	42142	RNA binding motif protein X-linked-like-1 OS=Homo sapiens OX=9606 GN=RBMXL1 PE=1 SV=1
1145	1912	P38159|RBMX_HUMAN	38.31	4	0	0	4	4	4	4			154	206	503	386	1	1	0	0	1	1	3	1	Phosphorylation (STY)	42332	RNA-binding motif protein X chromosome OS=Homo sapiens OX=9606 GN=RBMX PE=1 SV=3
1209	2997	Q4LDG9|DNAL1_HUMAN	38.27	12	5	5	5	0	0	12	210	156	123			0	2	2	1	1	2	0	0	1	Carbamidomethylation; Acetylation (Protein N-term); Phosphorylation (STY)	21533	Dynein light chain 1 axonemal OS=Homo sapiens OX=9606 GN=DNAL1 PE=1 SV=1
1287	1628	Q07157|ZO1_HUMAN	38.18	1	0	1	1	0	1	1		196	572		41.2	248	2	2	0	1	3	0	1	1	Phosphorylation (STY)	195457	Tight junction protein ZO-1 OS=Homo sapiens OX=9606 GN=TJP1 PE=1 SV=3
1470	1129	Q12802|AKP13_HUMAN	38.01	1	0	0	0	0	1	1		0			87.6	88.2	3	3	0	1	0	0	2	2	Oxidation (M); Acetylation (Protein N-term); Phosphorylation (STY)	307550	A-kinase anchor protein 13 OS=Homo sapiens OX=9606 GN=AKAP13 PE=1 SV=2
1402	2653	Q9BPX3|CND3_HUMAN	37.99	1	0	0	0	0	0	1						26.4	1	1	0	0	0	0	0	2	Phosphorylation (STY)	114334	Condensin complex subunit 3 OS=Homo sapiens OX=9606 GN=NCAPG PE=1 SV=1
1154	1495	Q5JRA6|TGO1_HUMAN	37.95	1	1	0	1	0	1	1	0		137		109	170	1	1	1	0	1	0	1	2	Phosphorylation (STY)	213700	Transport and Golgi organization protein 1 homolog OS=Homo sapiens OX=9606 GN=MIA3 PE=1 SV=1
1808	3027	P46937|YAP1_HUMAN	37.95	4	0	0	0	4	0	0				102			1	1	0	0	0	1	0	0	Phosphorylation (STY)	54462	Transcriptional coactivator YAP1 OS=Homo sapiens OX=9606 GN=YAP1 PE=1 SV=2
1716	2266	Q01433|AMPD2_HUMAN	37.85	1	0	0	0	0	0	1						0	1	1	0	0	0	0	0	1	Carbamidomethylation; Phosphorylation (STY)	100688	AMP deaminase 2 OS=Homo sapiens OX=9606 GN=AMPD2 PE=1 SV=2
1327	2163	P26368|U2AF2_HUMAN	37.83	4	0	0	4	2	2	2			0	0	268	111	2	2	0	0	2	1	4	3	Acetylation (Protein N-term); Phosphorylation (STY)	53501	Splicing factor U2AF 65 kDa subunit OS=Homo sapiens OX=9606 GN=U2AF2 PE=1 SV=4
1507	1193	Q13427|PPIG_HUMAN	37.8	3	0	0	0	1	3	3				0	109	117	2	2	0	0	0	2	2	4	Phosphorylation (STY)	88617	Peptidyl-prolyl cis-trans isomerase G OS=Homo sapiens OX=9606 GN=PPIG PE=1 SV=2
1239	3197	P16333|NCK1_HUMAN	37.72	6	6	0	0	6	6	6	0			49.7	128	239	1	1	1	0	0	1	1	1	Phosphorylation (STY)	42864	Cytoplasmic protein NCK1 OS=Homo sapiens OX=9606 GN=NCK1 PE=1 SV=1
1677	1915	O94956|SO2B1_HUMAN	37.66	5	2	2	0	5	0	2	37	0		0		112	2	2	1	1	0	2	0	1	Oxidation (M); Phosphorylation (STY)	76711	Solute carrier organic anion transporter family member 2B1 OS=Homo sapiens OX=9606 GN=SLCO2B1 PE=1 SV=2
1580	1014	Q9BXL7|CAR11_HUMAN	37.46	3	0	1	0	1	3	0		0		578	86.6		3	3	0	1	0	2	4	0	Carbamidomethylation; Phosphorylation (STY)	133284	Caspase recruitment domain-containing protein 11 OS=Homo sapiens OX=9606 GN=CARD11 PE=1 SV=3
1022	3091	Q9P0S2|COX16_HUMAN	37.36	11	11	11	0	0	11	11	85.4	49.4			88.3	82.9	1	1	3	1	0	0	2	1	Phosphorylation (STY)	12293	Cytochrome c oxidase assembly protein COX16 homolog mitochondrial OS=Homo sapiens OX=9606 GN=COX16 PE=1 SV=1
1638	1763	Q13835|PKP1_HUMAN	37.32	5	0	0	1	0	4	0			0		0		2	2	0	0	1	0	1	0	Carbamidomethylation; Phosphorylation (STY)	82861	Plakophilin-1 OS=Homo sapiens OX=9606 GN=PKP1 PE=1 SV=2
1658	1979	Q5T8P6|RBM26_HUMAN	37.28	1	0	0	0	0	1	1					0	0	1	1	0	0	0	0	1	1	Phosphorylation (STY)	113597	RNA-binding protein 26 OS=Homo sapiens OX=9606 GN=RBM26 PE=1 SV=3
1639	1828	Q7Z2W4|ZCCHV_HUMAN	37.2	3	0	0	0	0	1	1					0	110	2	2	0	0	0	0	1	2	Carbamidomethylation; Phosphorylation (STY)	101431	Zinc finger CCCH-type antiviral protein 1 OS=Homo sapiens OX=9606 GN=ZC3HAV1 PE=1 SV=3
1650	1274	Q8IY33|MILK2_HUMAN	37.16	4	0	0	0	3	0	1				23.6		0	2	2	0	0	0	1	0	1	Acetylation (Protein N-term); Phosphorylation (STY)	97502	MICAL-like protein 2 OS=Homo sapiens OX=9606 GN=MICALL2 PE=1 SV=1
1709	1992	Q96NA2|RILP_HUMAN	37.14	10	0	0	4	0	0	6			321			102	2	2	0	0	1	0	0	2	Phosphorylation (STY)	44200	Rab-interacting lysosomal protein OS=Homo sapiens OX=9606 GN=RILP PE=1 SV=1
1141	2392	P50548|ERF_HUMAN	37.07	3	3	3	3	3	3	3	4650	5320	8060	397	6720	11900	1	1	5	8	7	7	4	8	Phosphorylation (STY)	58703	ETS domain-containing transcription factor ERF OS=Homo sapiens OX=9606 GN=ERF PE=1 SV=2
1286	2838	Q9HBG4|VPP4_HUMAN	37.04	2	2	2	2	2	2	2	1080	836	1050	1670	1140	1520	1	1	1	1	3	1	5	1	Acetylation (Protein N-term); Phosphorylation (STY)	96386	V-type proton ATPase 116 kDa subunit a isoform 4 OS=Homo sapiens OX=9606 GN=ATP6V0A4 PE=1 SV=2
1360	968	Q9Y2E4|DIP2C_HUMAN	36.89	2	1	1	1	1	1	0	0	33.5	42.7	2090	0		3	3	1	1	1	2	1	0	Phosphorylation (STY)	170766	Disco-interacting protein 2 homolog C OS=Homo sapiens OX=9606 GN=DIP2C PE=1 SV=2
1481	1157	P78559|MAP1A_HUMAN	36.84	2	1	1	0	0	0	1	784	45800		0		34700	5	5	2	2	0	1	0	4	Phosphorylation (STY)	305484	Microtubule-associated protein 1A OS=Homo sapiens OX=9606 GN=MAP1A PE=1 SV=6
1355	2482	P12645|BMP3_HUMAN	36.84	3	3	3	3	3	0	3	295	102	0	184		312	1	1	1	1	1	1	0	1	Phosphorylation (STY)	53372	Bone morphogenetic protein 3 OS=Homo sapiens OX=9606 GN=BMP3 PE=1 SV=2
1643	2239	Q3MIS6|ZN528_HUMAN	36.83	2	0	0	2	2	2	0			72.3	122	36.8		1	1	0	0	1	1	1	0	Carbamidomethylation; Phosphorylation (STY)	72138	Zinc finger protein 528 OS=Homo sapiens OX=9606 GN=ZNF528 PE=2 SV=1
1290	1456	P47736|RPGP1_HUMAN	36.63	5	1	2	1	2	4	1	0	91.5	0	0	100	0	3	3	1	1	2	2	3	2	Acetylation (Protein N-term); Phosphorylation (STY)	73361	Rap1 GTPase-activating protein 1 OS=Homo sapiens OX=9606 GN=RAP1GAP PE=1 SV=2
1829	3253	O75791|GRAP2_HUMAN	36.55	4	0	0	0	0	0	4						0	1	1	0	0	0	0	0	1	Phosphorylation (STY)	37909	GRB2-related adapter protein 2 OS=Homo sapiens OX=9606 GN=GRAP2 PE=1 SV=1
1307	2442	P52954|LBX1_HUMAN	36.49	5	5	0	5	5	5	5	359		347	2290	46.3	790	1	1	3	0	2	3	1	3	Phosphorylation (STY)	30221	Transcription factor LBX1 OS=Homo sapiens OX=9606 GN=LBX1 PE=2 SV=2
1706	2963	Q9Y6W5|WASF2_HUMAN	36.46	2	0	0	0	0	2	2					69.9	46.2	1	1	0	0	0	0	2	1	Phosphorylation (STY)	54284	Wiskott-Aldrich syndrome protein family member 2 OS=Homo sapiens OX=9606 GN=WASF2 PE=1 SV=3
1433	3028	P52823|STC1_HUMAN	36.44	4	0	0	0	4	0	0				69.4			1	1	0	0	0	2	0	0	Phosphorylation (STY)	27621	Stanniocalcin-1 OS=Homo sapiens OX=9606 GN=STC1 PE=1 SV=1
1588	1673	Q3KQU3|MA7D1_HUMAN	36.42	7	0	0	2	0	5	0			82.7		16.3		3	3	0	0	1	0	2	0	Phosphorylation (STY)	92820	MAP7 domain-containing protein 1 OS=Homo sapiens OX=9606 GN=MAP7D1 PE=1 SV=1
1227	3425	P49450|CENPA_HUMAN	36.29	10	0	0	0	0	10	10					0	0	1	1	0	0	0	0	1	3	Phosphorylation (STY)	15991	Histone H3-like centromeric protein A OS=Homo sapiens OX=9606 GN=CENPA PE=1 SV=1
1331	1944	O43151|TET3_HUMAN	36.27	1	1	1	1	1	0	0	257	0	113	177			2	2	1	1	1	2	0	0	Acetylation (Protein N-term); Phosphorylation (STY)	179349	Methylcytosine dioxygenase TET3 OS=Homo sapiens OX=9606 GN=TET3 PE=1 SV=3
1247	3192	P46527|CDN1B_HUMAN	36.26	5	0	0	0	0	5	5					130	135	1	1	0	0	0	0	2	1	Phosphorylation (STY)	22073	Cyclin-dependent kinase inhibitor 1B OS=Homo sapiens OX=9606 GN=CDKN1B PE=1 SV=1
1483	1768	Q9BXW9|FACD2_HUMAN	35.85	2	1	1	0	0	2	0	876	899			49.5		2	2	3	3	0	0	1	0	Acetylation (Protein N-term); Phosphorylation (STY)	164128	Fanconi anemia group D2 protein OS=Homo sapiens OX=9606 GN=FANCD2 PE=1 SV=2
1633	2610	Q9UM21|MGT4A_HUMAN	35.75	5	1	1	5	1	1	1	0	0	0	374	302	485	2	2	2	1	2	2	2	2	Phosphorylation (STY)	61544	Alpha-1 3-mannosyl-glycoprotein 4-beta-N-acetylglucosaminyltransferase A OS=Homo sapiens OX=9606 GN=MGAT4A PE=1 SV=1
1713	2190	O00429|DNM1L_HUMAN	35.73	2	0	0	0	0	0	2						21.7	1	1	0	0	0	0	0	1	Phosphorylation (STY)	81877	Dynamin-1-like protein OS=Homo sapiens OX=9606 GN=DNM1L PE=1 SV=2
1680	2050	Q9NSY1|BMP2K_HUMAN	35.7	5	0	0	0	0	0	5						0	2	2	0	0	0	0	0	3	Phosphorylation (STY)	129171	BMP-2-inducible protein kinase OS=Homo sapiens OX=9606 GN=BMP2K PE=1 SV=2
1687	2550	Q16512|PKN1_HUMAN	35.7	1	0	0	0	0	0	1						23.4	1	1	0	0	0	0	0	1	Phosphorylation (STY)	103932	Serine/threonine-protein kinase N1 OS=Homo sapiens OX=9606 GN=PKN1 PE=1 SV=2
1764	2381	O14576|DC1I1_HUMAN	35.6	5	0	0	0	2	3	0				0	171		2	2	0	0	0	1	1	0	Carbamidomethylation; Oxidation (M); Acetylation (Protein N-term); Phosphorylation (STY)	72955	Cytoplasmic dynein 1 intermediate chain 1 OS=Homo sapiens OX=9606 GN=DYNC1I1 PE=1 SV=2
1649	3445	Q9Y2B1|RXLT1_HUMAN	35.59	5	4	5	0	5	5	5	42.6	122		153	96.2	0	2	2	1	1	0	1	1	2	Phosphorylation (STY)	51146	Ribitol-5-phosphate xylosyltransferase 1 OS=Homo sapiens OX=9606 GN=RXYLT1 PE=1 SV=1
1747	2702	Q6P988|NOTUM_HUMAN	35.58	4	0	0	0	0	0	4						0	1	1	0	0	0	0	0	1	Carbamidomethylation; Phosphorylation (STY)	55699	Palmitoleoyl-protein carboxylesterase NOTUM OS=Homo sapiens OX=9606 GN=NOTUM PE=1 SV=2
1274	1450	Q6R327|RICTR_HUMAN	35.57	1	1	1	1	1	0	1	2070	31200	188	2350		14500	2	2	2	7	1	2	0	5	Acetylation (Protein N-term); Phosphorylation (STY)	192216	Rapamycin-insensitive companion of mTOR OS=Homo sapiens OX=9606 GN=RICTOR PE=1 SV=1
1662	2343	Q9NS40|KCNH7_HUMAN	35.55	1	0	1	1	0	0	1		0	26.5			118	1	1	0	1	1	0	0	1	Phosphorylation (STY)	135000	Potassium voltage-gated channel subfamily H member 7 OS=Homo sapiens OX=9606 GN=KCNH7 PE=2 SV=2
1847	3474	P50151|GBG10_HUMAN	35.39	16	0	0	16	0	0	0			18.7				1	1	0	0	1	0	0	0	Acetylation (Protein N-term); Phosphorylation (STY)	7205	Guanine nucleotide-binding protein G(I)/G(S)/G(O) subunit gamma-10 OS=Homo sapiens OX=9606 GN=GNG10 PE=1 SV=1
1558	2355	Q86XP3|DDX42_HUMAN	35.31	3	0	0	0	0	3	3					0	0	1	1	0	0	0	0	2	1	Phosphorylation (STY)	102975	ATP-dependent RNA helicase DDX42 OS=Homo sapiens OX=9606 GN=DDX42 PE=1 SV=1
1530	1282	P42679|MATK_HUMAN	35.24	11	0	0	5	6	4	6			2000	7600	0	295	3	3	0	0	1	9	1	3	Phosphorylation (STY)	56469	Megakaryocyte-associated tyrosine-protein kinase OS=Homo sapiens OX=9606 GN=MATK PE=1 SV=1
1743	2543	O95400|CD2B2_HUMAN	35.2	4	0	0	0	0	4	4					85.3	99	1	1	0	0	0	0	1	1	Phosphorylation (STY)	37646	CD2 antigen cytoplasmic tail-binding protein 2 OS=Homo sapiens OX=9606 GN=CD2BP2 PE=1 SV=1
1404	2840	Q5SSJ5|HP1B3_HUMAN	35.05	2	2	0	0	0	2	2	666				395	167	2	2	1	0	0	0	1	1	Acetylation (Protein N-term); Phosphorylation (STY)	61207	Heterochromatin protein 1-binding protein 3 OS=Homo sapiens OX=9606 GN=HP1BP3 PE=1 SV=1
1682	2303	O75151|PHF2_HUMAN	35.02	2	0	0	0	0	0	2						30.6	1	1	0	0	0	0	0	1	Phosphorylation (STY)	120775	Lysine-specific demethylase PHF2 OS=Homo sapiens OX=9606 GN=PHF2 PE=1 SV=4
1514	2258	P01703|LV140_HUMAN	35	44	31	0	0	14	31	31	27			107	0	0	2	2	1	0	0	1	1	1	Carbamidomethylation; Phosphorylation (STY)	12302	Immunoglobulin lambda variable 1-40 OS=Homo sapiens OX=9606 GN=IGLV1-40 PE=1 SV=2
1738	2321	Q92598|HS105_HUMAN	34.88	1	0	0	0	1	0	0				38.2			1	1	0	0	0	1	0	0	Phosphorylation (STY)	96865	Heat shock protein 105 kDa OS=Homo sapiens OX=9606 GN=HSPH1 PE=1 SV=1
1552	2126	Q8WWI1|LMO7_HUMAN	34.74	1	0	0	0	0	0	1						63.2	1	1	0	0	0	0	0	2	Phosphorylation (STY)	192694	LIM domain only protein 7 OS=Homo sapiens OX=9606 GN=LMO7 PE=1 SV=3
1561	1215	P52790|HXK3_HUMAN	34.69	8	1	0	0	7	0	0	0			0			3	3	2	0	0	3	0	0	Carbamidomethylation; Oxidation (M); Phosphorylation (STY)	99025	Hexokinase-3 OS=Homo sapiens OX=9606 GN=HK3 PE=1 SV=2
1776	3167	Q9HCC0|MCCB_HUMAN	34.62	2	0	2	0	0	0	0		53.6					1	1	0	1	0	0	0	0	Acetylation (Protein N-term); Phosphorylation (STY)	61333	Methylcrotonoyl-CoA carboxylase beta chain mitochondrial OS=Homo sapiens OX=9606 GN=MCCC2 PE=1 SV=1
1569	2297	Q7Z4S6|KI21A_HUMAN	34.53	1	1	1	0	1	1	0	0	0		96.6	104		1	1	1	1	0	1	2	0	Phosphorylation (STY)	187178	Kinesin-like protein KIF21A OS=Homo sapiens OX=9606 GN=KIF21A PE=1 SV=2
1519	2172	P53804|TTC3_HUMAN	34.46	2	0	1	1	0	1	1		67.7	122		3860	54.2	2	2	0	2	3	0	1	1	Carbamidomethylation; Acetylation (Protein N-term); Phosphorylation (STY)	229867	E3 ubiquitin-protein ligase TTC3 OS=Homo sapiens OX=9606 GN=TTC3 PE=1 SV=2
1349	2141	P15056|BRAF_HUMAN	34.46	2	0	1	0	0	1	1		0			0	0	2	2	0	1	0	0	6	1	Phosphorylation (STY)	84437	Serine/threonine-protein kinase B-raf OS=Homo sapiens OX=9606 GN=BRAF PE=1 SV=4
1497	1053	Q12830|BPTF_HUMAN	34.2	2	0	1	0	1	0	0		321		30.7	0		4	4	0	2	0	1	1	0	Carbamidomethylation; Acetylation (Protein N-term); Phosphorylation (STY)	338262	Nucleosome-remodeling factor subunit BPTF OS=Homo sapiens OX=9606 GN=BPTF PE=1 SV=3
1512	1574	O60303|K0556_HUMAN	34.16	3	1	2	0	1	0	0	0	28.1		1150			2	2	1	1	0	3	0	0	Oxidation (M); Acetylation (Protein N-term); Phosphorylation (STY)	180916	Protein KIAA0556 OS=Homo sapiens OX=9606 GN=KIAA0556 PE=1 SV=4
1810	3086	Q13601|KRR1_HUMAN	34.1	3	0	0	0	0	3	0					73.7		1	1	0	0	0	0	1	0	Acetylation (Protein N-term); Phosphorylation (STY)	43665	KRR1 small subunit processome component homolog OS=Homo sapiens OX=9606 GN=KRR1 PE=1 SV=4
1719	2531	P18850|ATF6A_HUMAN	34.1	2	0	2	0	0	0	0		0					1	1	0	1	0	0	0	0	Phosphorylation (STY)	74585	Cyclic AMP-dependent transcription factor ATF-6 alpha OS=Homo sapiens OX=9606 GN=ATF6 PE=1 SV=3
1625	2455	Q92620|PRP16_HUMAN	34.05	4	0	0	3	1	0	0			0	131			2	2	0	0	1	1	0	0	Carbamidomethylation; Oxidation (M); Acetylation (Protein N-term); Phosphorylation (STY)	140502	Pre-mRNA-splicing factor ATP-dependent RNA helicase PRP16 OS=Homo sapiens OX=9606 GN=DHX38 PE=1 SV=2
1614	1972	O94762|RECQ5_HUMAN	34.03	6	0	5	0	2	0	0		0		2200			3	3	0	1	0	3	0	0	Carbamidomethylation; Acetylation (Protein N-term); Phosphorylation (STY)	108858	ATP-dependent DNA helicase Q5 OS=Homo sapiens OX=9606 GN=RECQL5 PE=1 SV=2
1535	1819	A0A1W2PR48|TLE7_HUMAN	33.97	4	2	2	4	2	2	4	1310	2170	5480	0	1840	7580	2	2	1	2	3	1	2	3	Phosphorylation (STY)	48656	Transducin-like enhancer protein 7 OS=Homo sapiens OX=9606 GN=TLE7 PE=3 SV=1
1509	1201	P54098|DPOG1_HUMAN	33.93	2	2	0	0	1	1	1	0			3580	62.5	35.9	2	2	3	0	0	10	1	2	Phosphorylation (STY)	139562	DNA polymerase subunit gamma-1 OS=Homo sapiens OX=9606 GN=POLG PE=1 SV=1
1690	2899	P05114|HMGN1_HUMAN	33.83	24	0	0	24	13	24	24			0	55.3	0	0	2	2	0	0	1	1	1	2	Phosphorylation (STY)	10659	Non-histone chromosomal protein HMG-14 OS=Homo sapiens OX=9606 GN=HMGN1 PE=1 SV=3
1619	3002	O43399|TPD54_HUMAN	33.63	5	5	0	0	0	5	5	60.7				293	487	1	1	1	0	0	0	2	3	Phosphorylation (STY)	22238	Tumor protein D54 OS=Homo sapiens OX=9606 GN=TPD52L2 PE=1 SV=2
1560	2736	O76024|WFS1_HUMAN	33.45	1	1	1	1	1	1	1	94.7	176	152	1700	183	584	1	1	2	1	3	6	2	1	Carbamidomethylation; Acetylation (Protein N-term); Phosphorylation (STY)	100291	Wolframin OS=Homo sapiens OX=9606 GN=WFS1 PE=1 SV=2
1468	1810	Q99758|ABCA3_HUMAN	33.26	2	1	1	1	2	1	1	2450	2060	3480	10600	4450	5940	2	2	7	6	8	7	10	12	Oxidation (M); Acetylation (Protein N-term); Phosphorylation (STY)	191361	ATP-binding cassette sub-family A member 3 OS=Homo sapiens OX=9606 GN=ABCA3 PE=1 SV=2
1724	2792	Q9NQH7|XPP3_HUMAN	33.25	3	0	0	0	3	0	0				0			1	1	0	0	0	1	0	0	Phosphorylation (STY)	57034	Xaa-Pro aminopeptidase 3 OS=Homo sapiens OX=9606 GN=XPNPEP3 PE=1 SV=1
1669	2249	Q9NWB6|ARGL1_HUMAN	33.23	9	0	0	5	5	9	5			326	257	983	541	2	2	0	0	1	1	2	1	Phosphorylation (STY)	33216	Arginine and glutamate-rich protein 1 OS=Homo sapiens OX=9606 GN=ARGLU1 PE=1 SV=1
1543	2260	Q5T1H1|EYS_HUMAN	33.15	2	0	0	2	0	2	2			0		0	202	2	2	0	0	1	0	2	2	Carbamidomethylation; Oxidation (M); Acetylation (Protein N-term); Phosphorylation (STY)	350797	Protein eyes shut homolog OS=Homo sapiens OX=9606 GN=EYS PE=1 SV=5
1664	2440	Q495B1|AKD1A_HUMAN	33.11	2	2	2	0	0	0	0	43.8	33.6					1	1	3	1	0	0	0	0	Acetylation (Protein N-term); Phosphorylation (STY)	57550	Ankyrin repeat and death domain-containing protein 1A OS=Homo sapiens OX=9606 GN=ANKDD1A PE=2 SV=2
1540	915	P42331|RHG25_HUMAN	33.08	9	0	0	0	0	8	3					329	344	4	4	0	0	0	0	5	3	Acetylation (Protein N-term); Phosphorylation (STY)	73435	Rho GTPase-activating protein 25 OS=Homo sapiens OX=9606 GN=ARHGAP25 PE=1 SV=2
1765	2408	Q9H9A5|CNO10_HUMAN	33.07	3	0	0	0	3	0	0				31.8			1	1	0	0	0	2	0	0	Oxidation (M); Phosphorylation (STY)	82310	CCR4-NOT transcription complex subunit 10 OS=Homo sapiens OX=9606 GN=CNOT10 PE=1 SV=1
1774	3089	Q8N0U4|F185A_HUMAN	33.07	4	0	0	4	0	0	0			1500				1	1	0	0	1	0	0	0	Acetylation (Protein N-term); Phosphorylation (STY)	42301	Protein FAM185A OS=Homo sapiens OX=9606 GN=FAM185A PE=2 SV=3
1783	3466	P62324|BTG1_HUMAN	33.06	7	0	0	0	0	7	0					24.8		1	1	0	0	0	0	1	0	Phosphorylation (STY)	19209	Protein BTG1 OS=Homo sapiens OX=9606 GN=BTG1 PE=1 SV=1
1460	1164	Q12955|ANK3_HUMAN	33.06	2	1	0	1	0	0	0	18.4		162	2760	494	197	6	6	3	0	2	6	1	1	Oxidation (M); Acetylation (Protein N-term); Phosphorylation (STY)	480416	Ankyrin-3 OS=Homo sapiens OX=9606 GN=ANK3 PE=1 SV=3
1717	2373	P05186|PPBT_HUMAN	33.02	4	0	0	4	0	0	0			22.6				1	1	0	0	2	0	0	0	Carbamidomethylation; Phosphorylation (STY)	57305	Alkaline phosphatase tissue-nonspecific isozyme OS=Homo sapiens OX=9606 GN=ALPL PE=1 SV=4
1652	1423	Q8NDX5|PHC3_HUMAN	32.98	2	0	0	0	1	1	1				61.5	86.4	51.2	2	2	0	0	0	1	1	1	Acetylation (Protein N-term); Phosphorylation (STY)	106161	Polyhomeotic-like protein 3 OS=Homo sapiens OX=9606 GN=PHC3 PE=1 SV=1
1741	2437	Q99816|TS101_HUMAN	32.98	3	3	0	0	0	0	0	0						1	1	1	0	0	0	0	0	Phosphorylation (STY)	43944	Tumor susceptibility gene 101 protein OS=Homo sapiens OX=9606 GN=TSG101 PE=1 SV=2
1689	2586	Q9NRH2|SNRK_HUMAN	32.89	1	0	1	0	0	0	0		0					1	1	0	1	0	0	0	0	Phosphorylation (STY)	84276	SNF-related serine/threonine-protein kinase OS=Homo sapiens OX=9606 GN=SNRK PE=1 SV=2
1306	2181	Q9UPR0|PLCL2_HUMAN	32.87	4	0	0	0	0	2	2					1230	41.8	2	2	0	0	0	0	1	3	Carbamidomethylation; Phosphorylation (STY)	125866	Inactive phospholipase C-like protein 2 OS=Homo sapiens OX=9606 GN=PLCL2 PE=1 SV=2
1533	2171	Q86WZ0|HEAT4_HUMAN	32.87	2	2	1	1	1	1	0	331	0	522	9560	389		2	2	2	2	1	9	2	0	Acetylation (Protein N-term); Phosphorylation (STY)	117175	HEAT repeat-containing protein 4 OS=Homo sapiens OX=9606 GN=HEATR4 PE=2 SV=2
1782	3382	Q8NFY4|SEM6D_HUMAN	32.74	2	2	0	0	0	0	0	0						1	1	1	0	0	0	0	0	Phosphorylation (STY)	119872	Semaphorin-6D OS=Homo sapiens OX=9606 GN=SEMA6D PE=1 SV=1
1728	2986	P60468|SC61B_HUMAN	32.53	20	0	0	0	0	20	20					39.8	0	1	1	0	0	0	0	1	1	Phosphorylation (STY)	9974	Protein transport protein Sec61 subunit beta OS=Homo sapiens OX=9606 GN=SEC61B PE=1 SV=2
1280	1581	Q9C0C2|TB182_HUMAN	32.49	2	1	0	0	1	1	2	0			295	58.9	49.7	2	2	3	0	0	1	1	2	Acetylation (Protein N-term); Phosphorylation (STY)	181795	182 kDa tankyrase-1-binding protein OS=Homo sapiens OX=9606 GN=TNKS1BP1 PE=1 SV=4
1579	3651	Q8IXB3|TARG1_HUMAN	32.43	15	15	0	15	0	15	15	0		0		0	0	1	1	2	0	2	0	2	1	Oxidation (M); Phosphorylation (STY)	19254	Trafficking regulator of GLUT4 1 OS=Homo sapiens OX=9606 GN=TRARG1 PE=2 SV=2
1678	1916	Q99460|PSMD1_HUMAN	32.41	4	0	0	0	0	0	4						144	2	2	0	0	0	0	0	2	Phosphorylation (STY)	105836	26S proteasome non-ATPase regulatory subunit 1 OS=Homo sapiens OX=9606 GN=PSMD1 PE=1 SV=2
1770	2852	Q9NZ52|GGA3_HUMAN	32.39	2	0	0	0	0	0	2						66.1	1	1	0	0	0	0	0	1	Phosphorylation (STY)	78315	ADP-ribosylation factor-binding protein GGA3 OS=Homo sapiens OX=9606 GN=GGA3 PE=1 SV=1
1498	1472	O15230|LAMA5_HUMAN	32.39	3	2	1	0	0	0	1	1630	809	90.6			101	5	5	2	3	1	0	0	2	Carbamidomethylation; Acetylation (Protein N-term); Phosphorylation (STY)	399740	Laminin subunit alpha-5 OS=Homo sapiens OX=9606 GN=LAMA5 PE=1 SV=8
1848	3590	Q7L9L4|MOB1B_HUMAN	32.28	6	0	0	0	0	0	6						147	1	1	0	0	0	0	0	1	Phosphorylation (STY)	25091	MOB kinase activator 1B OS=Homo sapiens OX=9606 GN=MOB1B PE=1 SV=3
1585	1087	Q96JI7|SPTCS_HUMAN	32.27	2	0	0	0	2	0	0				1560			3	3	0	0	0	5	0	0	Oxidation (M); Acetylation (Protein N-term); Phosphorylation (STY)	278866	Spatacsin OS=Homo sapiens OX=9606 GN=SPG11 PE=1 SV=3
1772	3020	Q9Y5C1|ANGL3_HUMAN	32.12	3	0	3	0	0	0	0		35.2					1	1	0	1	0	0	0	0	Phosphorylation (STY)	53638	Angiopoietin-related protein 3 OS=Homo sapiens OX=9606 GN=ANGPTL3 PE=1 SV=1
1587	1601	Q15303|ERBB4_HUMAN	32.12	2	1	1	0	1	1	2	0	0		43.1	0	20.5	2	2	1	1	0	1	1	2	Phosphorylation (STY)	146808	Receptor tyrosine-protein kinase erbB-4 OS=Homo sapiens OX=9606 GN=ERBB4 PE=1 SV=1
1590	1893	Q10570|CPSF1_HUMAN	32.11	4	0	1	3	1	0	0		846	0	57.3			3	3	0	1	2	3	0	0	Oxidation (M); Phosphorylation (STY)	160883	Cleavage and polyadenylation specificity factor subunit 1 OS=Homo sapiens OX=9606 GN=CPSF1 PE=1 SV=2
1584	2101	Q92834|RPGR_HUMAN	32.1	1	0	1	0	0	0	0		0					1	1	0	1	0	0	0	0	Phosphorylation (STY)	113387	X-linked retinitis pigmentosa GTPase regulator OS=Homo sapiens OX=9606 GN=RPGR PE=1 SV=2
1634	2730	O60245|PCDH7_HUMAN	32.09	2	2	2	0	0	0	2	0	0				0	1	1	3	1	0	0	0	1	Phosphorylation (STY)	116071	Protocadherin-7 OS=Homo sapiens OX=9606 GN=PCDH7 PE=1 SV=2
1523	1335	Q86VM9|ZCH18_HUMAN	31.76	5	0	0	2	0	2	1			1470		598	0	3	3	0	0	1	0	4	1	Phosphorylation (STY)	106379	Zinc finger CCCH domain-containing protein 18 OS=Homo sapiens OX=9606 GN=ZC3H18 PE=1 SV=2
1329	3362	P58335|ANTR2_HUMAN	31.69	2	2	2	2	2	0	0	430	0	491	486			1	1	4	2	1	1	0	0	Phosphorylation (STY)	53666	Anthrax toxin receptor 2 OS=Homo sapiens OX=9606 GN=ANTXR2 PE=1 SV=5
1758	3514	P55081|MFAP1_HUMAN	31.68	5	0	0	0	0	0	5						0	1	1	0	0	0	0	0	1	Phosphorylation (STY)	51958	Microfibrillar-associated protein 1 OS=Homo sapiens OX=9606 GN=MFAP1 PE=1 SV=2
1693	1647	P28799|GRN_HUMAN	31.66	14	0	11	0	3	0	0		3350		0			2	2	0	1	0	1	0	0	Carbamidomethylation; Acetylation (Protein N-term); Phosphorylation (STY)	63545	Progranulin OS=Homo sapiens OX=9606 GN=GRN PE=1 SV=2
1536	3727	P40337|VHL_HUMAN	31.65	7	7	7	7	7	7	7	0	0	1790	3550	0	564	1	1	2	1	5	6	2	1	Carbamidomethylation; Phosphorylation (STY)	24153	von Hippel-Lindau disease tumor suppressor OS=Homo sapiens OX=9606 GN=VHL PE=1 SV=2
1576	1813	Q9C0E4|GRIP2_HUMAN	31.54	2	0	0	2	0	0	0			0				1	1	0	0	1	0	0	0	Phosphorylation (STY)	112573	Glutamate receptor-interacting protein 2 OS=Homo sapiens OX=9606 GN=GRIP2 PE=1 SV=4
1582	1634	Q9UI15|TAGL3_HUMAN	31.53	12	5	12	0	0	0	0	302	97					2	2	2	2	0	0	0	0	Oxidation (M); Phosphorylation (STY)	22473	Transgelin-3 OS=Homo sapiens OX=9606 GN=TAGLN3 PE=1 SV=2
1485	3200	Q13478|IL18R_HUMAN	31.47	3	3	3	3	3	3	3	0	1950	0	17000	340	0	1	1	1	5	4	2	2	2	Acetylation (Protein N-term); Phosphorylation (STY)	62304	Interleukin-18 receptor 1 OS=Homo sapiens OX=9606 GN=IL18R1 PE=1 SV=1
1694	1881	O75718|CRTAP_HUMAN	31.46	8	4	0	0	4	0	0	99.7			0			2	2	2	0	0	1	0	0	Carbamidomethylation; Acetylation (Protein N-term); Phosphorylation (STY)	46562	Cartilage-associated protein OS=Homo sapiens OX=9606 GN=CRTAP PE=1 SV=1
1698	1997	Q9NSV4|DIAP3_HUMAN	31.38	5	0	0	0	2	0	2				126		868	3	3	0	0	0	2	0	1	Carbamidomethylation; Oxidation (M); Phosphorylation (STY)	136926	Protein diaphanous homolog 3 OS=Homo sapiens OX=9606 GN=DIAPH3 PE=1 SV=4
1500	1777	Q2M3C7|SPKAP_HUMAN	31.36	1	0	1	0	0	0	0	0	38.3	0	3630	264	0	2	2	3	2	1	10	3	1	Phosphorylation (STY)	186455	A-kinase anchor protein SPHKAP OS=Homo sapiens OX=9606 GN=SPHKAP PE=1 SV=1
1653	1541	P51812|KS6A3_HUMAN	31.29	4	0	0	0	0	4	0					467		2	2	0	0	0	0	4	0	Acetylation (Protein N-term); Phosphorylation (STY)	83736	Ribosomal protein S6 kinase alpha-3 OS=Homo sapiens OX=9606 GN=RPS6KA3 PE=1 SV=1

## Sheet: phosphopeptide
Peptide	-10lgP	Mass	Length	ppm	m/z	RT	1/k0 Range	Area Sample C1	Area Sample C2	Area Sample C3	Count in C	Area Sample P1	Area Sample P2	Area Sample P3	Count in P	Fraction	Precursor Id	Source File	#Feature	#Feature Sample 1	#Feature Sample 2	#Feature Sample 3	#Feature Sample 4	#Feature Sample 5	#Feature Sample 6	Accession	PTM	AScore	Found By
ETTC(+57.02)SKES(+79.97)NEELTESC(+57.02)ETK	110.57	2340.9	19	-4.2	1171.45	33.69	1.1765-1.2044	172530	118980	125570	3	121210	120400	77803	3	2	19514	C2phos_Slot2-14_1_1309.d	222	35	45	38	32	32	40	P01042|KNG1_HUMAN	Carbamidomethylation; Phosphorylation (STY)	C4:Carbamidomethylation:1000.00;S8:Phosphorylation (STY):101.94;C16:Carbamidomethylation:1000.00	PEAKS DB
FRIS(+79.97)HELDS(+79.97)AS(+79.97)SEVN	87.64	1929.69	15	2.5	965.86	78.74	1.0691-1.0972	9553.7	2442.3	9914.3	3	8176.8	27586	18834	3	5	113259	P2phos_Slot2-11_1_1306.d	49	3	5	6	9	13	13	P10451|OSTP_HUMAN	Phosphorylation (STY)	S4:Phosphorylation (STY):184.78;S9:Phosphorylation (STY):83.88;S11:Phosphorylation (STY):33.98	PEAKS DB
SQEES(+79.97)EEGEEDATSEVDK	110.46	2076.75	18	3.1	1039.39	40.35	1.1151-1.1430	47504	35682	32668	3	22236	26211	22760	3	5	54491	P2phos_Slot2-11_1_1306.d	109	15	35	10	15	21	13	P05060|SCG1_HUMAN	Phosphorylation (STY)	S5:Phosphorylation (STY):87.62	PEAKS DB
TNTNVNC(+57.02)PIEC(+57.02)FMPLDVQADREDS(+79.97)RE	116.85	3189.32	26	-7	1064.11	99.27	1.0063-1.0344	78907	59496	79146	3	52542	64875	42903	3	3	150789	C3phos_Slot2-15_1_1310.d	134	22	14	18	23	29	28	P02751|FINC_HUMAN	Carbamidomethylation; Phosphorylation (STY)	C7:Carbamidomethylation:1000.00;C11:Carbamidomethylation:1000.00;S24:Phosphorylation (STY):314.05	PEAKS DB
EALQS(+79.97)EEDEEVKEEDTEQK	99.51	2343.95	19	3.9	1172.99	49.3	1.1743-1.2022	76609	84825	47174	3	55147	65149	72584	3	5	68708	P2phos_Slot2-11_1_1306.d	103	14	34	10	13	19	13	O94769|ECM2_HUMAN	Phosphorylation (STY)	S5:Phosphorylation (STY):291.18	PEAKS DB
ETTC(+57.02)SKES(+79.97)NEELTESC(+57.02)ETKK	95.93	2468.99	20	-2.4	824.005	30.02	0.9883-1.0164	53392	45089	51887	3	50211	43809	23387	3	3	32359	C3phos_Slot2-15_1_1310.d	118	32	7	21	23	14	21	P01042|KNG1_HUMAN	Carbamidomethylation; Phosphorylation (STY)	C4:Carbamidomethylation:1000.00;S8:Phosphorylation (STY):83.88;C16:Carbamidomethylation:1000.00	PEAKS DB
SLPGES(+79.97)EEMMEEVDQVTLYSYK	114.33	2643.1	22	-11	1322.55	101.53	1.2947-1.3225	28966	27928	5743.3	3	42495	35436	4326.9	3	3	157308	C3phos_Slot2-15_1_1310.d	67	14	12	6	15	9	11	P19823|ITIH2_HUMAN	Phosphorylation (STY)	S6:Phosphorylation (STY):68.60	PEAKS DB
AIPVAQDLNAPSDWDS(+79.97)RGK	80.8	2118.97	19	-2.2	1060.49	80.39	1.1676-1.1955	50880	51375	42863	3	86937	68467	109840	3	5	115903	P2phos_Slot2-11_1_1306.d	57	11	7	7	9	9	14	P10451|OSTP_HUMAN	Phosphorylation (STY)	S16:Phosphorylation (STY):111.84	PEAKS DB
TNTNVNC(+57.02)PIEC(+57.02)FM(+15.99)PLDVQADREDS(+79.97)RE	113.2	3205.32	26	1.1	1069.45	91.82	1.0142-1.0422	100080	69547	139880	3	80740	76099	84664	3	3	135322	C3phos_Slot2-15_1_1310.d	92	21	14	14	13	15	15	P02751|FINC_HUMAN	Carbamidomethylation; Oxidation (M); Phosphorylation (STY)	C7:Carbamidomethylation:1000.00;C11:Carbamidomethylation:1000.00;M13:Oxidation (M):1000.00;S24:Phosphorylation (STY):314.05	PEAKS DB
DSYETSQLDDQS(+79.97)AETHSHK	88.86	2256.88	19	-3.2	753.298	39.15	0.8870-0.9152	37902	50412	37332	3	45357	56322	83393	3	2	25886	C2phos_Slot2-14_1_1309.d	75	13	12	8	11	13	18	P10451|OSTP_HUMAN	Phosphorylation (STY)	S12:Phosphorylation (STY):68.47	PEAKS DB
ERADEPQWSLYPSDSQVS(+79.97)EEVK	95.61	2658.15	22	-3.1	887.056	86.14	0.9096-0.9377	39266	46131	34939	3	49981	28523	52346	3	1	102418	C1phos_Slot2-13_1_1308.d	63	6	12	13	12	10	10	P05060|SCG1_HUMAN	Phosphorylation (STY)	S18:Phosphorylation (STY):91.37	PEAKS DB
ET(+79.97)TC(+57.02)SKESNEELTESC(+57.02)ETK	71.68	2340.9	19	2.8	781.311	48.25	0.8565-0.8848	148090	31105	76732	3	43408	19551	35633	3	5	67146	P2phos_Slot2-11_1_1306.d	69	9	15	20	11	4	10	P01042|KNG1_HUMAN	Phosphorylation (STY); Carbamidomethylation	T2:Phosphorylation (STY):12.33;C4:Carbamidomethylation:1000.00;C16:Carbamidomethylation:1000.00	PEAKS DB
EFHS(+79.97)HEFHS(+79.97)HEDMLVVDPK	68.46	2478.97	19	-8.2	620.746	74.78	0.8000-0.8283	1921.2	1227.5	1401.8	3	4966.6	5281.2	9003.1	3	6	111474	P3phos_Slot2-12_1_1307.d	20	2	1	1	5	6	5	P10451|OSTP_HUMAN	Phosphorylation (STY)	S4:Phosphorylation (STY):1000.00;S9:Phosphorylation (STY):1000.00	PEAKS DB
VTTVASHTSDS(+79.97)DVPSGVTEVVVK	90.68	2393.14	23	-0.8	1197.58	73.66	1.2724-1.3002	44394	28997	29673	3	48297	41295	48501	3	5	105389	P2phos_Slot2-11_1_1306.d	49	9	7	7	8	10	8	P10909|CLUS_HUMAN	Phosphorylation (STY)	S11:Phosphorylation (STY):67.96	PEAKS DB
GEVQAMLGQS(+79.97)TEELRVR	82.7	1981.93	17	0.9	991.975	77.2	1.1531-1.1810	42341	27193	54615	3	62262	48220	59751	3	3	109553	C3phos_Slot2-15_1_1310.d	34	3	3	8	5	7	8	P02649|APOE_HUMAN	Phosphorylation (STY)	S10:Phosphorylation (STY):33.98	PEAKS DB
ETTC(+57.02)S(+79.97)KESNEELTESC(+57.02)ETK	75	2340.9	19	1.9	781.31	52.78	0.8486-0.8769	30842	78218	12886	3	20917	108870	13165	3	3	69209	C3phos_Slot2-15_1_1310.d	51	6	16	8	4	8	9	P01042|KNG1_HUMAN	Carbamidomethylation; Phosphorylation (STY)	C4:Carbamidomethylation:1000.00;S5:Phosphorylation (STY):12.33;C16:Carbamidomethylation:1000.00	PEAKS DB
MAHGYGEES(+79.97)EEERGLEPGK	80.78	2183.88	19	-1	728.97	47.93	0.8814-0.9096	60987	50354	40283	3	47276	18089	30374	3	3	59996	C3phos_Slot2-15_1_1310.d	49	13	12	6	10	4	4	P05060|SCG1_HUMAN	Phosphorylation (STY)	S9:Phosphorylation (STY):69.71	PEAKS DB
FRISHELDS(+79.97)AS(+79.97)SEVN	71.77	1849.73	15	0.2	925.874	70.98	1.0747-1.1027	23961	17583	17803	3	26906	15854	44561	3	5	101369	P2phos_Slot2-11_1_1306.d	19	3	4	2	2	3	5	P10451|OSTP_HUMAN	Phosphorylation (STY)	S9:Phosphorylation (STY):83.88;S11:Phosphorylation (STY):30.46	PEAKS DB
SLHNRELS(+79.97)AERPLNEQIAEAEEDK	72.03	2857.32	24	-4.1	715.335	75.7	0.8000-0.8283	97809	75027	65906	3	41019	84961	90922	3	2	74007	C2phos_Slot2-14_1_1309.d	34	7	6	5	5	5	6	Q8WXD2|SCG3_HUMAN	Phosphorylation (STY)	S8:Phosphorylation (STY):71.72	PEAKS DB
C(+57.02)DSSPDS(+79.97)AEDVRK	81.74	1544.58	13	5	773.304	24.81	0.9872-1.0153	49609	47296	15217	3	21703	26295	25073	3	5	25872	P2phos_Slot2-11_1_1306.d	57	11	11	8	7	10	10	P02765|FETUA_HUMAN	Carbamidomethylation; Phosphorylation (STY)	C1:Carbamidomethylation:1000.00;S7:Phosphorylation (STY):78.06	PEAKS DB
GQPRS(+79.97)QEESEEGEEDATSEVDK	115.99	2514.99	22	-1.9	839.337	40.36	0.8712-0.8994	54605	51117	44697	3	33553	24524	40736	3	3	48285	C3phos_Slot2-15_1_1310.d	79	17	10	21	10	10	11	P05060|SCG1_HUMAN	Phosphorylation (STY)	S5:Phosphorylation (STY):87.62	PEAKS DB
GHPQEES(+79.97)EESNVSMASLGEK	89.21	2223.9	20	0.3	1112.96	57.13	1.1251-1.1531	40616	26388	28330	3	27856	20979	31105	3	5	80900	P2phos_Slot2-11_1_1306.d	47	10	6	10	5	5	11	P05060|SCG1_HUMAN	Phosphorylation (STY)	S7:Phosphorylation (STY):91.37	PEAKS DB
FRIS(+79.97)HELDS(+79.97)ASSEVN	72.89	1849.73	15	0.8	925.874	75.48	1.0411-1.0691	0	842.63	10213	2	0	484.55	173.38	2	1	86329	C1phos_Slot2-13_1_1308.d	6	0	2	1	0	1	2	P10451|OSTP_HUMAN	Phosphorylation (STY)	S4:Phosphorylation (STY):164.15;S9:Phosphorylation (STY):52.04	PEAKS DB
YFIDFVARETTC(+57.02)SKES(+79.97)NEELTESC(+57.02)ETK	102.22	3352.42	27	1.4	1118.48	96.89	1.0501-1.0781	393.49	112.01	52300	3	8004.6	3288.8	2917.2	3	3	145168	C3phos_Slot2-15_1_1310.d	35	1	2	27	3	1	1	P01042|KNG1_HUMAN	Carbamidomethylation; Phosphorylation (STY)	C12:Carbamidomethylation:1000.00;S16:Phosphorylation (STY):47.36;C24:Carbamidomethylation:1000.00	PEAKS DB
S(+79.97)QETGDLDVGGLQETDK	96.36	1870.78	17	5.5	936.404	68.5	1.0647-1.0927	25839	22628	20493	3	27975	25521	33812	3	2	64426	C2phos_Slot2-14_1_1309.d	46	8	6	11	6	4	11	P23142|FBLN1_HUMAN	Phosphorylation (STY)	S1:Phosphorylation (STY):68.31	PEAKS DB
SSAINEEDGS(+79.97)S(+79.97)EEGVVINAGK	80.37	2250.89	21	0.1	1126.46	71.71	1.1598-1.1877	3647.4	2082.2	7239.5	3	2547.1	2921.1	4107	3	6	104252	P3phos_Slot2-12_1_1307.d	19	3	2	3	5	3	3	Q9BUN1|MENT_HUMAN	Phosphorylation (STY)	S10:Phosphorylation (STY):130.84;S11:Phosphorylation (STY):121.68	PEAKS DB
FRISHELDS(+79.97)ASSEVN	78.25	1769.76	15	3.7	885.893	67.61	1.0333-1.0613	74200	56520	52498	3	97339	90013	129970	3	1	74309	C1phos_Slot2-13_1_1308.d	47	8	10	4	8	9	8	P10451|OSTP_HUMAN	Phosphorylation (STY)	S9:Phosphorylation (STY):60.92	PEAKS DB
GEVQAM(+15.99)LGQS(+79.97)TEELRVR	71.22	1997.92	17	1.9	999.974	65.08	1.1430-1.1710	14847	4548	25408	3	19089	21394	17291	3	3	88135	C3phos_Slot2-15_1_1310.d	31	6	2	7	6	5	5	P02649|APOE_HUMAN	Oxidation (M); Phosphorylation (STY)	M6:Oxidation (M):1000.00;S10:Phosphorylation (STY):30.46	PEAKS DB
FRISHELDSAS(+79.97)SEVN	77.76	1769.76	15	4.8	885.893	64.86	1.0220-1.0501	76346	64902	72442	3	48186	83616	187330	3	2	59928	C2phos_Slot2-14_1_1309.d	44	8	6	7	8	6	9	P10451|OSTP_HUMAN	Phosphorylation (STY)	S11:Phosphorylation (STY):40.00	PEAKS DB
FRIS(+79.97)HELDSAS(+79.97)SEVN	73.73	1849.73	15	3.5	925.877	72.04	1.0613-1.0893	19934	15155	17803	3	27143	12977	27136	3	5	103860	P2phos_Slot2-11_1_1306.d	12	2	2	2	2	1	3	P10451|OSTP_HUMAN	Phosphorylation (STY)	S4:Phosphorylation (STY):135.05;S11:Phosphorylation (STY):30.46	PEAKS DB
LPGMEYVDGDFQC(+57.02)HTFDS(+79.97)SNVE	103.07	2626	22	1.1	1314.01	99.55	1.2669-1.2947	31873	22824	33676	3	24578	33197	27667	3	2	107238	C2phos_Slot2-14_1_1309.d	38	5	3	6	9	8	7	P24593|IBP5_HUMAN	Carbamidomethylation; Phosphorylation (STY)	C13:Carbamidomethylation:1000.00;S18:Phosphorylation (STY):33.98	PEAKS DB
ETTC(+57.02)S(+79.97)KESNEELTESC(+57.02)ETKK	64.2	2468.99	20	2.8	824.009	31.14	0.9636-0.9917	39927	35265	32685	3	34965	36408	11938	3	3	34237	C3phos_Slot2-15_1_1310.d	71	22	3	10	16	4	16	P01042|KNG1_HUMAN	Carbamidomethylation; Phosphorylation (STY)	C4:Carbamidomethylation:1000.00;S5:Phosphorylation (STY):11.10;C16:Carbamidomethylation:1000.00	PEAKS DB
GQPRSQEES(+79.97)EEGEEDATSEVDK	103.95	2514.99	22	-0.8	839.338	37.94	0.9005-0.9287	61230	40213	47401	3	6339.8	21949	45782	3	5	50265	P2phos_Slot2-11_1_1306.d	63	10	12	13	9	9	10	P05060|SCG1_HUMAN	Phosphorylation (STY)	S9:Phosphorylation (STY):69.71	PEAKS DB
AIPVAQDLNAPSDWDS(+79.97)R	93.52	1933.86	17	3.3	967.942	89.19	1.1486-1.1765	11980	16839	13730	3	23212	21329	38456	3	5	129124	P2phos_Slot2-11_1_1306.d	34	7	3	6	4	5	9	P10451|OSTP_HUMAN	Phosphorylation (STY)	S16:Phosphorylation (STY):106.29	PEAKS DB
HAGSC(+57.02)AGTPEEPPGGES(+79.97)AEEEENFV	90.22	2666.01	25	-1.5	1334.01	72.22	1.2424-1.2702	9423.6	5918.3	4722.8	3	8761.8	6847.4	12613	3	1	81339	C1phos_Slot2-13_1_1308.d	26	3	3	4	5	5	6	O95633|FSTL3_HUMAN	Carbamidomethylation; Phosphorylation (STY)	C5:Carbamidomethylation:1000.00;S17:Phosphorylation (STY):159.26	PEAKS DB
GHPQEES(+79.97)EESNVSM(+15.99)ASLGEK	86.85	2239.89	20	-5.3	747.637	44.6	0.7853-0.8136	17209	9434	13868	3	12286	7767.3	11107	3	3	55357	C3phos_Slot2-15_1_1310.d	46	9	12	5	5	5	10	P05060|SCG1_HUMAN	Phosphorylation (STY); Oxidation (M)	S7:Phosphorylation (STY):61.77;M14:Oxidation (M):1000.00	PEAKS DB
ANDES(+79.97)NEHSDVIDSQELSK	110.34	2195.89	19	-2.2	732.969	51.97	0.8385-0.8667	35955	34770	19689	3	29847	35586	66621	3	5	72911	P2phos_Slot2-11_1_1306.d	49	6	9	7	5	7	15	P10451|OSTP_HUMAN	Phosphorylation (STY)	S5:Phosphorylation (STY):121.83	PEAKS DB
QNLLAPQNAVS(+79.97)S(+79.97)EETNDFK	71.22	2263.94	19	-0.1	1132.98	87.04	1.1832-1.2111	2125.5	1017.8	1049	3	3108.1	2891.4	2457.2	3	5	126087	P2phos_Slot2-11_1_1306.d	18	3	2	2	5	4	2	P10451|OSTP_HUMAN	Phosphorylation (STY)	S11:Phosphorylation (STY):42.89;S12:Phosphorylation (STY):49.37	PEAKS DB
GQPRS(+79.97)QEES(+79.97)EEGEEDATSEVDK	114.42	2594.95	22	-4.5	865.99	40.75	0.8791-0.9073	12946	12238	8324.6	3	9040.4	7118	10702	3	5	54865	P2phos_Slot2-11_1_1306.d	19	3	2	2	5	4	3	P05060|SCG1_HUMAN	Phosphorylation (STY)	S5:Phosphorylation (STY):185.99;S9:Phosphorylation (STY):193.63	PEAKS DB
WAEGGGHS(+79.97)RERADEPQWSLYPSDSQVSEEVK	99.67	3595.56	31	-9.9	899.892	82.95	0.8430-0.8712	4119.8	6357.9	4975.7	3	4868	2268.3	3598.9	3	3	119676	C3phos_Slot2-15_1_1310.d	15	1	4	1	3	3	3	P05060|SCG1_HUMAN	Phosphorylation (STY)	S8:Phosphorylation (STY):57.10	PEAKS DB
IERDS(+79.97)REHEEPTTS(+79.97)EMAEETYSPK	93.43	3010.19	24	-0.8	1004.41	57.45	0.9467-0.9748	14189	10350	2269	3	17327	18531	21096	3	5	81158	P2phos_Slot2-11_1_1306.d	24	5	4	3	3	4	5	P24593|IBP5_HUMAN	Phosphorylation (STY)	S5:Phosphorylation (STY):104.80;S14:Phosphorylation (STY):27.96	PEAKS DB
VIES(+79.97)EEITEEHSVSENQESSSSSSSSSSSSTIR	80.14	3581.5	33	3.9	1194.85	61.64	1.0366-1.0647	6730.7	3385.9	1313.9	3	4578.2	5775.2	2786.2	3	5	87334	P2phos_Slot2-11_1_1306.d	83	21	9	7	21	15	10	Q92954|PRG4_HUMAN	Phosphorylation (STY)	S4:Phosphorylation (STY):61.69	PEAKS DB
GQPRS(+79.97)QEES(+79.97)EEGEEDATSEVDKR	89.49	2751.05	23	-1	918.024	39.81	0.9310-0.9591	6301.2	5222	5228.8	3	7143.8	3752.3	5122.4	3	2	27014	C2phos_Slot2-14_1_1309.d	15	2	2	2	4	2	3	P05060|SCG1_HUMAN	Phosphorylation (STY)	S5:Phosphorylation (STY):85.25;S9:Phosphorylation (STY):81.34	PEAKS DB
SLPGES(+79.97)EEM(+15.99)MEEVDQVTLYSYK	114.87	2659.1	22	1	1330.56	98.75	1.2991-1.3269	24778	19383	65840	3	15556	15747	17232	3	3	149571	C3phos_Slot2-15_1_1310.d	68	10	7	17	15	8	11	P19823|ITIH2_HUMAN	Phosphorylation (STY); Oxidation (M)	S6:Phosphorylation (STY):61.26;M9:Oxidation (M):40.00	PEAKS DB
SQEES(+79.97)EEGEEDATSEVDKR	94.62	2232.85	19	3.1	1117.44	39.57	1.1430-1.1710	27078	25563	17500	3	30649	19257	25133	3	3	47179	C3phos_Slot2-15_1_1310.d	39	7	6	6	8	5	7	P05060|SCG1_HUMAN	Phosphorylation (STY)	S5:Phosphorylation (STY):105.60	PEAKS DB
EALQS(+79.97)EEDEEVKEEDTEQKR	89.04	2500.05	20	1.7	834.361	47.62	0.9287-0.9568	15549	10969	8719.3	3	17076	12186	18389	3	5	65845	P2phos_Slot2-11_1_1306.d	31	7	3	3	5	5	8	O94769|ECM2_HUMAN	Phosphorylation (STY)	S5:Phosphorylation (STY):194.28	PEAKS DB
EFHSHEFHS(+79.97)HEDMLVVDPK	63.3	2399	19	-9.5	600.754	79.03	0.7921-0.8204	3123	3923	2013	3	9866	4291.1	11070	3	6	117599	P3phos_Slot2-12_1_1307.d	35	5	5	3	7	5	10	P10451|OSTP_HUMAN	Phosphorylation (STY)	S9:Phosphorylation (STY):25.58	PEAKS DB
DS(+79.97)S(+79.97)EEFK	45.41	1000.28	7	3.2	1001.29	34.14	1.3325-1.3602	0	0	0	0	0	0	0	0	2	20119	C2phos_Slot2-14_1_1309.d	0	0	0	0	0	0	0	Q9P2P6|STAR9_HUMAN	Phosphorylation (STY)	S2:Phosphorylation (STY):1000.00;S3:Phosphorylation (STY):1000.00	PEAKS DB
FRIS(+79.97)HELDSASSEVN	80.14	1769.76	15	8	885.898	72.62	1.0243-1.0523	46071	20672	19983	3	38245	34095	51606	3	5	103780	P2phos_Slot2-11_1_1306.d	33	7	3	3	9	6	5	P10451|OSTP_HUMAN	Phosphorylation (STY)	S4:Phosphorylation (STY):115.97	PEAKS DB
ADEPQWSLYPSDSQVS(+79.97)EEVK	73.73	2373	20	1.5	1187.51	93.45	1.2022-1.2301	17963	23153	26476	3	29288	15225	24076	3	3	138994	C3phos_Slot2-15_1_1310.d	28	5	3	5	5	5	5	P05060|SCG1_HUMAN	Phosphorylation (STY)	S16:Phosphorylation (STY):73.31	PEAKS DB
IERDS(+79.97)REHEEPT(+79.97)TS(+79.97)EMAEETYSPK	72.14	3090.16	24	-1.8	1031.06	57.25	0.9321-0.9602	8435.9	3851.8	3941.9	3	1488.2	6156.6	7621.4	3	5	80495	P2phos_Slot2-11_1_1306.d	12	2	2	2	1	3	2	P24593|IBP5_HUMAN	Phosphorylation (STY)	S5:Phosphorylation (STY):32.94;T12:Phosphorylation (STY):8.69;S14:Phosphorylation (STY):33.98	PEAKS DB
S(+79.97)QEESEEGEEDATSEVDK	106.03	2076.75	18	4.7	1039.39	42.18	1.0972-1.1251	2698.8	27265	2665.6	3	4619.8	0	14754	2	2	30548	C2phos_Slot2-14_1_1309.d	38	4	19	3	5	0	7	P05060|SCG1_HUMAN	Phosphorylation (STY)	S1:Phosphorylation (STY):79.36	PEAKS DB
A(+42.01)S(+79.97)GVAVSDGVIK	69.68	1223.58	12	-1.9	612.796	78.91	0.9017-0.9298	19231	16640	18268	3	15198	28492	28383	3	2	78718	C2phos_Slot2-14_1_1309.d	29	6	3	5	3	5	7	P23528|COF1_HUMAN	Acetylation (Protein N-term); Phosphorylation (STY)	A1:Acetylation (Protein N-term):1000.00;S2:Phosphorylation (STY):139.79	PEAKS DB
GQPRS(+79.97)QEESEEGEEDATSEVDKR	87.59	2671.09	23	-3.7	891.367	40.72	0.8746-0.9028	8068.4	6084.6	7946	3	5264.6	3215.7	4243.9	3	2	28486	C2phos_Slot2-14_1_1309.d	24	3	4	7	5	2	3	P05060|SCG1_HUMAN	Phosphorylation (STY)	S5:Phosphorylation (STY):38.03	PEAKS DB
ISHELDS(+79.97)AS(+79.97)SEVN	65.37	1546.56	13	-0.9	774.286	49.46	0.9422-0.9703	8093.1	6721	8188.4	3	15494	13005	18451	3	2	39623	C2phos_Slot2-14_1_1309.d	12	2	2	1	1	4	2	P10451|OSTP_HUMAN	Phosphorylation (STY)	S7:Phosphorylation (STY):65.81;S9:Phosphorylation (STY):26.02	PEAKS DB
RPDIQYPDAT(+79.97)DEDITS(+79.97)HMES(+79.97)EELNGAYK	58.44	3463.32	28	3.3	1155.46	91.81	1.0523-1.0804	4777.9	5002.7	125.49	3	16500	8662	16185	3	6	140127	P3phos_Slot2-12_1_1307.d	18	3	3	1	6	2	3	P10451|OSTP_HUMAN	Phosphorylation (STY)	T10:Phosphorylation (STY):12.42;S16:Phosphorylation (STY):7.40;S20:Phosphorylation (STY):10.19	PEAKS DB
LVQYRGEVQAMLGQS(+79.97)TEELR	77.83	2386.14	20	-7.9	796.381	94.16	0.8915-0.9197	2367.3	1404.6	10184	3	3994.9	1335	8714.1	3	3	140352	C3phos_Slot2-15_1_1310.d	25	1	1	8	6	3	6	P02649|APOE_HUMAN	Phosphorylation (STY)	S15:Phosphorylation (STY):27.96	PEAKS DB
WAEGGGHS(+79.97)RERADEPQWSLYPSDSQVS(+79.97)EEVK	85.3	3675.53	31	-6.5	919.884	82.97	0.8633-0.8915	3722.6	4710.8	6363.6	3	4705.6	3194.7	6019.5	3	4	137906	P1phos_Slot2-10_1_1305.d	13	1	3	2	3	2	2	P05060|SCG1_HUMAN	Phosphorylation (STY)	S8:Phosphorylation (STY):58.64;S27:Phosphorylation (STY):77.24	PEAKS DB
LPGM(+15.99)EYVDGDFQC(+57.02)HTFDS(+79.97)SNVE	81.43	2642	22	-1.1	1322.01	91.19	1.2557-1.2835	18709	13067	28263	3	20872	21616	22995	3	5	132101	P2phos_Slot2-11_1_1306.d	41	9	6	7	5	7	7	P24593|IBP5_HUMAN	Oxidation (M); Carbamidomethylation; Phosphorylation (STY)	M4:Oxidation (M):1000.00;C13:Carbamidomethylation:1000.00;S18:Phosphorylation (STY):17.01	PEAKS DB
RDHHS(+79.97)THYRAS(+79.97)EEEPEYGEEIK	65.88	2858.13	22	-6.9	715.536	58.29	0.8498-0.8780	25029	15458	5350.8	3	9130.6	6993.8	10577	3	2	51843	C2phos_Slot2-14_1_1309.d	19	5	7	2	1	1	3	P05060|SCG1_HUMAN	Phosphorylation (STY)	S5:Phosphorylation (STY):17.01;S11:Phosphorylation (STY):13.44	PEAKS DB
GNPEPPVS(+79.97)GEMDDNSLSPEAC(+57.02)YEC(+57.02)K	108.16	2861.09	25	-1.3	954.704	76.09	0.9805-1.0086	11639	7873	7831.2	3	9225.7	9792.1	13621	3	5	109104	P2phos_Slot2-11_1_1306.d	27	5	3	4	3	5	7	P35555|FBN1_HUMAN	Phosphorylation (STY); Carbamidomethylation	S8:Phosphorylation (STY):86.63;C21:Carbamidomethylation:1000.00;C24:Carbamidomethylation:1000.00	PEAKS DB
FRIS(+79.97)HELDS(+79.97)ASS(+79.97)EVN	62.86	1929.69	15	4.8	965.859	91.67	1.0669-1.0949	0	1239.7	1699.8	2	7499.5	7574.1	3694	3	4	155555	P1phos_Slot2-10_1_1305.d	16	0	1	1	5	7	2	P10451|OSTP_HUMAN	Phosphorylation (STY)	S4:Phosphorylation (STY):93.60;S9:Phosphorylation (STY):48.87;S12:Phosphorylation (STY):14.02	PEAKS DB
GEVQAMLGQS(+79.97)TEELR	85.7	1726.76	15	5.6	864.392	77.02	1.0265-1.0546	21266	16215	19833	3	32550	20760	25248	3	2	75853	C2phos_Slot2-14_1_1309.d	12	2	1	2	2	2	3	P02649|APOE_HUMAN	Phosphorylation (STY)	S10:Phosphorylation (STY):27.96	PEAKS DB
EVVTS(+79.97)EDGSDC(+57.02)PEAMDLGTLSGIGTLDGFR	139.76	3207.36	30	-0.5	1070.13	103.1	0.9984-1.0265	8991.3	3536.2	14039	3	7054.1	8216.1	9622.5	3	3	160726	C3phos_Slot2-15_1_1310.d	38	6	5	7	6	7	7	P02671|FIBA_HUMAN	Phosphorylation (STY); Carbamidomethylation	S5:Phosphorylation (STY):33.98;C11:Carbamidomethylation:1000.00	PEAKS DB
KAES(+79.97)PVKEEAVAEVVTITK	93.02	2107.08	19	-1.7	703.368	79.03	0.9096-0.9377	2647.6	9500.4	14488	3	17708	10052	13122	3	3	112547	C3phos_Slot2-15_1_1310.d	25	1	4	4	7	4	5	P07197|NFM_HUMAN	Phosphorylation (STY)	S4:Phosphorylation (STY):299.86	PEAKS DB
ANDES(+79.97)NEHSDVIDS(+79.97)QELSK	100.59	2275.85	19	1.6	1138.94	54.03	1.1542-1.1821	6144.4	6993.1	4864.8	3	9713.4	10375	16878	3	5	76234	P2phos_Slot2-11_1_1306.d	16	2	2	3	3	3	3	P10451|OSTP_HUMAN	Phosphorylation (STY)	S5:Phosphorylation (STY):82.24;S14:Phosphorylation (STY):64.16	PEAKS DB
QGHPENRDMPAS(+79.97)EDLQDLQK	74.84	2387.02	20	-2.1	796.681	58.78	0.8814-0.9096	9800.9	7553.2	12541	3	5476.3	9288.1	15063	3	5	83037	P2phos_Slot2-11_1_1306.d	23	4	2	3	3	3	8	P49908|SEPP1_HUMAN	Phosphorylation (STY)	S12:Phosphorylation (STY):1000.00	PEAKS DB
LFPAPSEKS(+79.97)HEETDSTK	67.78	1981.87	17	1.1	661.63	43.91	0.8633-0.8915	12719	10666	8848.5	3	13289	10790	13344	3	2	32865	C2phos_Slot2-14_1_1309.d	21	2	3	2	6	4	4	Q8WXD2|SCG3_HUMAN	Phosphorylation (STY)	S9:Phosphorylation (STY):38.16	PEAKS DB
IERDS(+79.97)REHEEPTT(+79.97)SEMAEETYSPK	82.41	3010.19	24	-0.5	1004.4	56.84	0.9580-0.9861	18345	12401	16924	3	21074	5320.8	16546	3	2	49577	C2phos_Slot2-14_1_1309.d	22	4	4	3	6	3	2	P24593|IBP5_HUMAN	Phosphorylation (STY)	S5:Phosphorylation (STY):67.12;T13:Phosphorylation (STY):17.01	PEAKS DB
IERDS(+79.97)REHEEPTTSEMAEETYSPK	99.99	2930.23	24	3.9	733.569	53.46	0.8181-0.8464	16301	10635	14815	3	19241	10517	15746	3	5	75590	P2phos_Slot2-11_1_1306.d	30	4	4	6	7	4	5	P24593|IBP5_HUMAN	Phosphorylation (STY)	S5:Phosphorylation (STY):50.34	PEAKS DB
DAEYGAS(+79.97)PEQVADNGDDHSEGGLVENHVDSTMNMLGGGGSAGRKPLK	85.39	4848.1	47	-0.8	970.627	85.82	1.0411-1.0691	1369.9	790.35	1430.1	3	1383.9	868.47	3260.8	3	4	144026	P1phos_Slot2-10_1_1305.d	14	1	1	3	3	1	5	P18065|IBP2_HUMAN	Phosphorylation (STY)	S7:Phosphorylation (STY):101.94	PEAKS DB
GEVQAM(+15.99)LGQS(+79.97)TEELR	80.36	1742.75	15	-1	872.386	61.02	1.0187-1.0467	6028.2	2394.8	10265	3	13599	8369.8	8808.9	3	3	82667	C3phos_Slot2-15_1_1310.d	28	4	2	10	2	5	5	P02649|APOE_HUMAN	Oxidation (M); Phosphorylation (STY)	M6:Oxidation (M):1000.00;S10:Phosphorylation (STY):30.46	PEAKS DB
LPIVNFDY(+79.97)S(+79.97)MEEK	55.74	1743.69	13	-0.3	872.852	101.02	1.0837-1.1117	5390.3	5730.4	4109.7	3		2315.4	5821.9	2	1	127188	C1phos_Slot2-13_1_1308.d	11	3	2	1	0	2	3	O94769|ECM2_HUMAN	Phosphorylation (STY)	Y8:Phosphorylation (STY):1000.00;S9:Phosphorylation (STY):1000.00	PEAKS DB
ISHELDSAS(+79.97)SEVN	74.93	1466.59	13	2.8	734.306	43.65	0.9276-0.9557	18730	31804	15997	3	31106	44096	21362	3	2	32742	C2phos_Slot2-14_1_1309.d	34	5	6	3	4	10	6	P10451|OSTP_HUMAN	Phosphorylation (STY)	S9:Phosphorylation (STY):24.44	PEAKS DB
AQRS(+79.97)WEEEEEEEEREEDLMPEK	69.37	2886.15	22	0.4	963.061	71.38	1.1128-1.1408	16187	6352.4	4802.6	3	3455.3	10866	12474	3	1	80056	C1phos_Slot2-13_1_1308.d	14	2	3	2	3	2	2	P20396|TRH_HUMAN	Phosphorylation (STY)	S4:Phosphorylation (STY):1000.00	PEAKS DB
SLPGES(+79.97)EEM(+15.99)M(+15.99)EEVDQVTLYSYK	98.49	2675.09	22	0	1338.56	94.45	1.2802-1.3080	8065.7	6910.1	34842	3	11084	8449.4	9850.1	3	3	139523	C3phos_Slot2-15_1_1310.d	38	7	8	9	5	3	6	P19823|ITIH2_HUMAN	Phosphorylation (STY); Oxidation (M)	S6:Phosphorylation (STY):39.44;M9:Oxidation (M):1000.00;M10:Oxidation (M):1000.00	PEAKS DB
S(+79.97)QEESEEGEEDATSEVDKR	74.22	2232.85	19	-5.6	745.288	41.28	0.8407-0.8690	26130	20483	18014	3	26100	18050	26565	3	2	29095	C2phos_Slot2-14_1_1309.d	51	9	6	7	8	11	10	P05060|SCG1_HUMAN	Phosphorylation (STY)	S1:Phosphorylation (STY):82.63	PEAKS DB
RDHHST(+79.97)HYRAS(+79.97)EEEPEYGEEIK	68.58	2858.13	22	-7.7	715.537	60.53	0.8498-0.8780	31115	13605	9867.2	3	11793	9615.1	9148.9	3	1	63959	C1phos_Slot2-13_1_1308.d	21	5	2	2	5	4	3	P05060|SCG1_HUMAN	Phosphorylation (STY)	T6:Phosphorylation (STY):12.28;S11:Phosphorylation (STY):16.66	PEAKS DB
SLPGES(+79.97)EEMM(+15.99)EEVDQVTLYSYK	115.95	2659.1	22	0.2	1330.56	99.84	1.2802-1.3080	24461	13132	42184	3	12883	12494	15276	3	3	152136	C3phos_Slot2-15_1_1310.d	48	6	5	14	9	5	9	P19823|ITIH2_HUMAN	Phosphorylation (STY); Oxidation (M)	S6:Phosphorylation (STY):61.30;M10:Oxidation (M):33.98	PEAKS DB
VES(+79.97)LEQEAANERQQLVETHMAR	78.96	2647.21	22	-1.4	883.41	81.73	0.9219-0.9501	11573	9089.9	10390	3	10736	7483.8	10270	3	3	117494	C3phos_Slot2-15_1_1310.d	11	2	4	1	2	1	1	P05067|A4_HUMAN	Phosphorylation (STY)	S3:Phosphorylation (STY):352.08	PEAKS DB
VC(+57.02)RGDGELS(+79.97)WEHSDGDIFRQPANR	88.38	2880.24	24	-3.9	721.066	78.78	0.8836-0.9118	13221	7640.2	8073.6	3	9803.2	14290	10319	3	5	113388	P2phos_Slot2-11_1_1306.d	34	6	3	6	7	8	4	Q9BU40|CRDL1_HUMAN	Carbamidomethylation; Phosphorylation (STY)	C2:Carbamidomethylation:1000.00;S9:Phosphorylation (STY):77.13	PEAKS DB
EDIPPADLS(+79.97)DQVPDTESETR	68.48	2292.96	20	2.2	1147.49	76.15	1.1765-1.2044	1544.7	1039.8	1371.6	3	1590.4	2291.5	503.8	3	1	87336	C1phos_Slot2-13_1_1308.d	12	2	2	2	2	3	1	P01024|CO3_HUMAN	Phosphorylation (STY)	S9:Phosphorylation (STY):77.93	PEAKS DB
ISHELDS(+79.97)ASSEVN	66.87	1466.59	13	2	734.305	46.38	0.9219-0.9501	13138	23780	9505.2	3	28948	26816	14450	3	2	36012	C2phos_Slot2-14_1_1309.d	23	2	4	5	3	5	4	P10451|OSTP_HUMAN	Phosphorylation (STY)	S7:Phosphorylation (STY):36.05	PEAKS DB
ESEDKPEIEDVGS(+79.97)DEEEEKK	105.08	2399.97	20	-1.4	801	44.55	0.8938-0.9219	13471	9880.3	18861	3	17404	15524	25975	3	3	55545	C3phos_Slot2-15_1_1310.d	22	8	3	2	4	3	2	P07900|HS90A_HUMAN	Phosphorylation (STY)	S13:Phosphorylation (STY):234.24	PEAKS DB
VDYESQSTDTQNFS(+79.97)SESK	101.6	2130.83	18	3	1066.43	48.67	1.1128-1.1408	7767.6	6492.9	17902	3	6447.9	12890	16307	3	1	46960	C1phos_Slot2-13_1_1308.d	28	1	4	9	3	6	5	P17936|IBP3_HUMAN	Phosphorylation (STY)	S14:Phosphorylation (STY):30.46	PEAKS DB
IERDS(+79.97)REHEEPT(+79.97)TSEMAEETYSPK	76.47	3010.19	24	-3.7	1004.4	51.87	0.9242-0.9523	18048	11990	16649	3	19547	18011	24316	3	1	52155	C1phos_Slot2-13_1_1308.d	17	3	3	3	2	2	4	P24593|IBP5_HUMAN	Phosphorylation (STY)	S5:Phosphorylation (STY):81.34;T12:Phosphorylation (STY):0.00	PEAKS DB
GKDS(+79.97)YETSQLDDQSAETHSHK	82.49	2442	21	0.3	611.507	36.01	0.8159-0.8441	3971.5	5202.1	3736.4	3	9206.7	7727.8	18838	3	4	44798	P1phos_Slot2-10_1_1305.d	19	2	4	2	4	3	4	P10451|OSTP_HUMAN	Phosphorylation (STY)	S4:Phosphorylation (STY):40.00	PEAKS DB
GWRVPGPAEGPAEPAAEAS(+79.97)DEAERR	76.13	2684.2	25	-2.3	672.057	67.72	0.8915-0.9197	7392	6340.1	5463.4	3	7670.8	4167.6	5812.2	3	5	96102	P2phos_Slot2-11_1_1306.d	21	3	5	3	3	2	5	Q24JP5|T132A_HUMAN	Phosphorylation (STY)	S19:Phosphorylation (STY):1000.00	PEAKS DB
IERDS(+79.97)REHEEPTT(+79.97)S(+79.97)EMAEETYSPK	78.98	3090.16	24	-3.8	773.546	56.8	0.7740-0.8023	2425.3	3720.7	0	2	3887.7	5922.5	310.69	3	6	79949	P3phos_Slot2-12_1_1307.d	8	2	2	0	1	1	2	P24593|IBP5_HUMAN	Phosphorylation (STY)	S5:Phosphorylation (STY):38.64;T13:Phosphorylation (STY):17.01;S14:Phosphorylation (STY):26.31	PEAKS DB
YFIDFVARETTC(+57.02)S(+79.97)KESNEELTESC(+57.02)ETK	88.74	3352.42	27	-7.1	839.107	97.49	0.8633-0.8915	0	0	41521	1	3422.3	0	0	1	3	147963	C3phos_Slot2-15_1_1310.d	21	0	0	20	1	0	0	P01042|KNG1_HUMAN	Carbamidomethylation; Phosphorylation (STY)	C12:Carbamidomethylation:1000.00;S13:Phosphorylation (STY):12.33;C24:Carbamidomethylation:1000.00	PEAKS DB
VTEPIS(+79.97)AES(+79.97)GEQVERVNEPSILEMSR	91.85	3045.34	26	1.1	1016.12	94.85	0.9782-1.0063	1564.9	1385.8	7340.4	3	1854.5	2206.8	6443.2	3	3	141349	C3phos_Slot2-15_1_1310.d	9	1	3	1	1	1	2	O14791|APOL1_HUMAN	Phosphorylation (STY)	S6:Phosphorylation (STY):82.63;S9:Phosphorylation (STY):104.80	PEAKS DB
SPVPKS(+79.97)PVEEK	64.33	1275.61	11	0.2	638.814	33.36	0.8881-0.9163	10499	27472	9953.4	3	13762	12405	15763	3	1	25906	C1phos_Slot2-13_1_1308.d	15	3	3	2	2	1	4	P07197|NFM_HUMAN	Phosphorylation (STY)	S6:Phosphorylation (STY):99.73	PEAKS DB
RDHHSTHY(+79.97)RAS(+79.97)EEEPEYGEEIK	62.78	2858.13	22	-7.1	715.537	60.25	0.8520-0.8802	28985	17618	15989	3	198.09	9078.7	10898	3	3	81359	C3phos_Slot2-15_1_1310.d	23	5	4	5	1	2	6	P05060|SCG1_HUMAN	Phosphorylation (STY)	Y8:Phosphorylation (STY):12.16;S11:Phosphorylation (STY):16.46	PEAKS DB
TPPAPKT(+79.97)PPSSGEPPK	68.15	1666.8	16	-3.6	556.606	37.08	0.7559-0.7842	1989.2	956.84	1132.9	3	1233.3	1003.9	1195.7	3	3	43739	C3phos_Slot2-15_1_1310.d	27	5	5	4	5	5	3	P10636|TAU_HUMAN	Phosphorylation (STY)	T7:Phosphorylation (STY):38.16	PEAKS DB
S(+79.97)KEQLTPLIK	71.47	1235.65	10	-5	618.832	63.19	0.8723-0.9005	24582	15318	24310	3	10260	24090	25681	3	1	67534	C1phos_Slot2-13_1_1308.d	13	2	2	2	3	2	2	P02652|APOA2_HUMAN	Phosphorylation (STY)	S1:Phosphorylation (STY):79.02	PEAKS DB
S(+79.97)HEETDSTKEEAAK	69.34	1640.66	14	-4.3	547.892	13.25	0.8046-0.8328	7503.4	8245.8	3346.7	3	4948.4	6552.8	9828.6	3	1	3782	C1phos_Slot2-13_1_1308.d	14	2	3	2	3	2	2	Q8WXD2|SCG3_HUMAN	Phosphorylation (STY)	S1:Phosphorylation (STY):109.97	PEAKS DB
ETT(+79.97)C(+57.02)SKESNEELTESC(+57.02)ETK	74.95	2340.9	19	-1.6	781.307	35.52	0.8712-0.8994	27471	2313	6462.2	3	4274.3	4924.3	9246.1	3	3	41234	C3phos_Slot2-15_1_1310.d	16	4	4	2	1	3	2	P01042|KNG1_HUMAN	Phosphorylation (STY); Carbamidomethylation	T3:Phosphorylation (STY):10.19;C4:Carbamidomethylation:1000.00;C16:Carbamidomethylation:1000.00	PEAKS DB
GGLQPPDS(+79.97)KDDTPMTLPK	73.9	1975.9	18	3.1	988.958	72.36	1.1072-1.1352	11641	8751	5748.2	3	10010	8088	9389.2	3	2	70170	C2phos_Slot2-14_1_1309.d	21	4	4	2	4	2	5	P51693|APLP1_HUMAN	Phosphorylation (STY)	S8:Phosphorylation (STY):67.69	PEAKS DB
TC(+57.02)VADES(+79.97)AENC(+57.02)DK	96.88	1577.54	13	4.5	789.78	27.5	0.9512-0.9793	22982	24788	15549	3	13821	19237	18933	3	2	11790	C2phos_Slot2-14_1_1309.d	25	7	2	2	5	5	4	P02768|ALBU_HUMAN	Carbamidomethylation; Phosphorylation (STY)	C2:Carbamidomethylation:1000.00;S7:Phosphorylation (STY):176.18;C11:Carbamidomethylation:1000.00	PEAKS DB
GQPRSQEES(+79.97)EEGEEDATSEVDKR	87.64	2671.09	23	-1.4	891.369	37.93	0.9265-0.9546	11172	10327	2060.6	3	5736.3	6122.5	8118.1	3	2	24711	C2phos_Slot2-14_1_1309.d	28	8	5	2	5	3	5	P05060|SCG1_HUMAN	Phosphorylation (STY)	S9:Phosphorylation (STY):28.70	PEAKS DB
HTFMGVVSLGSPS(+79.97)GEVSHPR	80.35	2159.98	20	-1	721.001	83.15	0.9298-0.9580	9020.8	5417	2203.8	3	1343.1	4526	2456.6	3	2	85048	C2phos_Slot2-14_1_1309.d	24	7	3	4	2	6	2	P02765|FETUA_HUMAN	Phosphorylation (STY)	S13:Phosphorylation (STY):32.28	PEAKS DB
LFPAPSEKS(+79.97)HEETDSTKEEAAK	66.99	2510.12	22	1.1	837.717	44.32	1.0074-1.0355	7638.3	3540.7	1739.1	3	7401.2	7265.7	2116.9	3	1	41047	C1phos_Slot2-13_1_1308.d	19	4	3	1	4	5	2	Q8WXD2|SCG3_HUMAN	Phosphorylation (STY)	S9:Phosphorylation (STY):22.34	PEAKS DB
ETAVS(+79.97)TEDDSHHK	68.99	1534.59	13	1.2	768.307	16.63	0.9490-0.9771	11764	15781	3580.2	3	11858	12847	12787	3	5	12689	P2phos_Slot2-11_1_1306.d	14	3	2	2	2	2	3	Q14515|SPRL1_HUMAN	Phosphorylation (STY)	S5:Phosphorylation (STY):40.00	PEAKS DB
GKDSYETSQLDDQS(+79.97)AETHSHK	87.6	2442	21	0.3	815.007	34.62	0.8949-0.9231	1713.3	1464.2	1812.8	3	4164.1	3565.7	9963.5	3	4	42167	P1phos_Slot2-10_1_1305.d	24	2	3	3	4	4	8	P10451|OSTP_HUMAN	Phosphorylation (STY)	S14:Phosphorylation (STY):38.16	PEAKS DB
DSYETS(+79.97)QLDDQSAETHSHK	83.76	2256.88	19	1.3	753.302	41.39	0.8656-0.8938	11235	34929	26375	3	25137	38220	35956	3	2	29417	C2phos_Slot2-14_1_1309.d	23	6	3	3	2	3	6	P10451|OSTP_HUMAN	Phosphorylation (STY)	S6:Phosphorylation (STY):33.98	PEAKS DB
RPDIQYPDATDEDIT(+79.97)S(+79.97)HMES(+79.97)EELNGAYK	50.95	3463.32	28	0	1155.45	89.76	1.0389-1.0669	1469.4	2157	6437.8	3	14095	8662	10869	3	6	136379	P3phos_Slot2-12_1_1307.d	11	1	1	2	2	2	3	P10451|OSTP_HUMAN	Phosphorylation (STY)	T15:Phosphorylation (STY):17.25;S16:Phosphorylation (STY):15.01;S20:Phosphorylation (STY):9.39	PEAKS DB
DQQRNPGTSTTPSQPNS(+79.97)AGVQDTEMGPC(+57.02)RR	88.47	3351.44	30	-1.5	838.865	47.9	0.8870-0.9152	19979	13924	9872.7	3	12948	18839	20634	3	2	37890	C2phos_Slot2-14_1_1309.d	21	3	3	3	5	3	4	P24592|IBP6_HUMAN	Phosphorylation (STY); Carbamidomethylation	S17:Phosphorylation (STY):33.81;C28:Carbamidomethylation:1000.00	PEAKS DB
GSVQYLPDLDDKNS(+79.97)QEK	67.64	2014.89	17	1.8	1008.46	70.43	1.1061-1.1341	7159.5	5383.7	4183.6	3	2643.8	4867.4	3635.3	3	3	98001	C3phos_Slot2-15_1_1310.d	15	2	2	4	3	2	2	Q9UGM5|FETUB_HUMAN	Phosphorylation (STY)	S14:Phosphorylation (STY):174.15	PEAKS DB
GFVPAGESS(+79.97)SEAGGENYK	88.96	1864.75	18	3.3	933.389	58.79	1.0175-1.0456	21014	16613	17301	3	16509	22256	21749	3	5	82884	P2phos_Slot2-11_1_1306.d	14	3	2	2	2	2	3	Q14766|LTBP1_HUMAN	Phosphorylation (STY)	S9:Phosphorylation (STY):33.98	PEAKS DB
LVGGPMDAS(+79.97)VEEEGVRR	74.49	1879.85	17	4.6	940.939	62.98	1.0456-1.0736	11213	8234.3	6932.6	3	10875	11235	11733	3	3	85729	C3phos_Slot2-15_1_1310.d	22	3	3	3	4	3	6	P01034|CYTC_HUMAN	Phosphorylation (STY)	S9:Phosphorylation (STY):1000.00	PEAKS DB
IHWESASLLRS(+79.97)EETK	71.31	1864.87	15	1.1	933.447	73.68	1.1083-1.1363	4646.7	3106	5980.8	3	5132.8	5476.6	6974.4	3	3	103639	C3phos_Slot2-15_1_1310.d	18	4	2	3	2	3	4	P01024|CO3_HUMAN	Phosphorylation (STY)	S11:Phosphorylation (STY):37.54	PEAKS DB
AIPVAQDLNAPS(+79.97)DWDSRGK	67.97	2118.97	19	2.6	1060.5	81.47	1.1810-1.2089	16708	38739	4463	3	57580	33748	66041	3	5	117724	P2phos_Slot2-11_1_1306.d	17	2	3	2	2	4	4	P10451|OSTP_HUMAN	Phosphorylation (STY)	S12:Phosphorylation (STY):55.21	PEAKS DB
M(+15.99)AHGYGEES(+79.97)EEERGLEPGK	86.37	2199.88	19	0.3	734.302	44.58	0.9107-0.9388	25884	2814.7	19700	3	13638	7213.9	1859.2	3	1	41107	C1phos_Slot2-13_1_1308.d	15	4	2	2	3	2	2	P05060|SCG1_HUMAN	Oxidation (M); Phosphorylation (STY)	M1:Oxidation (M):1000.00;S9:Phosphorylation (STY):42.89	PEAKS DB
EDDGS(+79.97)ES(+79.97)EEEYSAPLPALAPSSS	102.42	2525.92	23	2.2	1263.98	102.23	1.1911-1.2189	1042.7	868.81	651.82	3	1877.7	1076.4	1443.4	3	1	128909	C1phos_Slot2-13_1_1308.d	9	1	1	1	2	2	2	P19021|AMD_HUMAN	Phosphorylation (STY)	S5:Phosphorylation (STY):55.13;S7:Phosphorylation (STY):55.36	PEAKS DB
RPDIQYPDAT(+79.97)DEDITSHMES(+79.97)EELNGAYK	73.39	3383.36	28	2.1	1128.8	90.4	1.0344-1.0624	4390.1	5438.5	4853.8	3	10649	3222	11252	3	5	131026	P2phos_Slot2-11_1_1306.d	15	2	2	2	3	1	5	P10451|OSTP_HUMAN	Phosphorylation (STY)	T10:Phosphorylation (STY):25.70;S20:Phosphorylation (STY):23.70	PEAKS DB
DM(+15.99)PAS(+79.97)EDLQDLQK	72.64	1584.64	13	3.7	793.331	61.62	0.9737-1.0018	7629.1	5025.3	10552	3	3622.8	10186	11820	3	3	83230	C3phos_Slot2-15_1_1310.d	22	3	3	4	1	5	6	P49908|SEPP1_HUMAN	Oxidation (M); Phosphorylation (STY)	M2:Oxidation (M):1000.00;S5:Phosphorylation (STY):1000.00	PEAKS DB
ET(+79.97)TC(+57.02)SKESNEELTESC(+57.02)ETKK	65.73	2468.99	20	0.7	824.007	30.81	0.9602-0.9883	26112	34672	12671	3	24235	36723	2508.9	3	1	24224	C1phos_Slot2-13_1_1308.d	27	4	2	4	1	8	8	P01042|KNG1_HUMAN	Phosphorylation (STY); Carbamidomethylation	T2:Phosphorylation (STY):14.02;C4:Carbamidomethylation:1000.00;C16:Carbamidomethylation:1000.00	PEAKS DB
MQEDEFDQGNQEQEDNS(+79.97)NAEMEEENASNVNK	151.57	3681.36	31	2.1	1228.13	61.03	1.0445-1.0725	2465.2	2624.8	805.61	3	2541.1	3036.4	3434.2	3	5	86343	P2phos_Slot2-11_1_1306.d	11	1	1	1	4	1	3	Q14515|SPRL1_HUMAN	Phosphorylation (STY)	S17:Phosphorylation (STY):207.31	PEAKS DB
ELS(+79.97)AERPLNEQIAEAEEDK	74.28	2250.01	19	-4.4	751.006	77.5	0.8498-0.8780	8620.4	6620.7	4136.8	3	11603	6939.8	7757.5	3	2	76955	C2phos_Slot2-14_1_1309.d	16	3	4	2	2	2	3	Q8WXD2|SCG3_HUMAN	Phosphorylation (STY)	S3:Phosphorylation (STY):1000.00	PEAKS DB
VRES(+79.97)DEETQIK	65.78	1412.62	11	2.7	707.32	29.32	0.9321-0.9602	5001.7	5592.5	28007	3	9757.6	5031.2	14292	3	3	31155	C3phos_Slot2-15_1_1310.d	19	2	2	8	3	2	2	P04114|APOB_HUMAN	Phosphorylation (STY)	S4:Phosphorylation (STY):105.32	PEAKS DB
FRRPDIQYPDATDEDIT(+79.97)SHMES(+79.97)EELNGAYK	64.28	3686.53	30	-1.3	1229.85	89.42	1.0759-1.1039	5083.4	13438	6116.6	3	19537	7600.1	27986	3	6	136216	P3phos_Slot2-12_1_1307.d	11	1	2	1	3	1	3	P10451|OSTP_HUMAN	Phosphorylation (STY)	T17:Phosphorylation (STY):14.02;S22:Phosphorylation (STY):11.12	PEAKS DB
IERDS(+79.97)REHEEPT(+79.97)T(+79.97)SEMAEETYSPK	62.84	3090.16	24	-3.1	1031.06	56.94	0.9478-0.9760	0		4033.9	1	816.79	0	7578.6	2	3	75676	C3phos_Slot2-15_1_1310.d	4	0	0	2	1	0	1	P24593|IBP5_HUMAN	Phosphorylation (STY)	S5:Phosphorylation (STY):34.08;T12:Phosphorylation (STY):0.00;T13:Phosphorylation (STY):0.00	PEAKS DB
S(+79.97)WEDNQQGDEALDTTK	83.03	1915.75	16	2.8	958.886	57.9	1.0534-1.0815	4010.7	4117.1	2217.5	3	2027.6	3354.9	3755.3	3	5	81737	P2phos_Slot2-11_1_1306.d	16	5	4	1	1	1	4	Q92563|TICN2_HUMAN	Phosphorylation (STY)	S1:Phosphorylation (STY):335.51	PEAKS DB
VES(+79.97)LEQEAANER	81.27	1453.61	12	0.3	727.812	51.61	0.9231-0.9512	13858	12000	10036	3	12183	10880	11664	3	2	42743	C2phos_Slot2-14_1_1309.d	12	2	1	2	3	1	3	P05067|A4_HUMAN	Phosphorylation (STY)	S3:Phosphorylation (STY):1000.00	PEAKS DB
WAEGGGHS(+79.97)RER	54.7	1320.54	11	3.8	661.278	18.6	0.8825-0.9107	17767	15962	10943	3	13787	9014.8	14110	3	4	13427	P1phos_Slot2-10_1_1305.d	15	2	3	3	2	2	3	P05060|SCG1_HUMAN	Phosphorylation (STY)	S8:Phosphorylation (STY):1000.00	PEAKS DB
VVQAPKEEEEDEQEAS(+79.97)EEKAS(+79.97)EEEK	67.83	3035.21	25	-2	1012.74	41.39	0.9456-0.9737	2337.3	1890.8	10268	3	853.8	1690.5	2012	3	3	50271	C3phos_Slot2-15_1_1310.d	8	1	1	3	1	1	1	Q9UK55|ZPI_HUMAN	Phosphorylation (STY)	S16:Phosphorylation (STY):1000.00;S21:Phosphorylation (STY):1000.00	PEAKS DB
VC(+57.02)RGDGELS(+79.97)WEHSDGDIFR	60.13	2313.95	19	-6.5	772.32	81.97	0.8125-0.8407	4135.3	3012.8	3401.9	3	3571	6522.7	4196.6	3	5	118316	P2phos_Slot2-11_1_1306.d	22	3	3	4	5	4	3	Q9BU40|CRDL1_HUMAN	Carbamidomethylation; Phosphorylation (STY)	C2:Carbamidomethylation:1000.00;S9:Phosphorylation (STY):67.69	PEAKS DB
DMPAS(+79.97)EDLQDLQK	79.69	1568.64	13	3.5	785.334	72.44	0.9771-1.0052	16259	13747	16931	3	13902	15908	20415	3	5	103136	P2phos_Slot2-11_1_1306.d	12	2	1	3	2	2	2	P49908|SEPP1_HUMAN	Phosphorylation (STY)	S5:Phosphorylation (STY):1000.00	PEAKS DB
Y(+79.97)LHENLPIPQRNT(+79.97)N	26.61	1867.8	14	3.3	934.914	82.34	1.1117-1.1397	1535.3	2116.3	7346.9	3	0	1969.1	4354.1	2	3	118214	C3phos_Slot2-15_1_1310.d	10	1	2	4	0	2	1		Phosphorylation (STY)	Y1:Phosphorylation (STY):1000.00;T13:Phosphorylation (STY):1000.00	PEAKS DB
GNPEPPVS(+79.97)GEM(+15.99)DDNSLSPEAC(+57.02)YEC(+57.02)K	107.8	2877.08	25	-1.2	960.036	67.53	0.9748-1.0029	3184.1	2062.4	2236.1	3	1817.8	2993.6	3352	3	5	95950	P2phos_Slot2-11_1_1306.d	22	6	3	3	2	4	4	P35555|FBN1_HUMAN	Phosphorylation (STY); Oxidation (M); Carbamidomethylation	S8:Phosphorylation (STY):51.17;M11:Oxidation (M):1000.00;C21:Carbamidomethylation:1000.00;C24:Carbamidomethylation:1000.00	PEAKS DB
LQGDQGEHS(+79.97)ASQIFQSDWLSK	78.86	2440.07	21	-4.5	814.362	94.58	0.8870-0.9152	8496.5	2721.4	6271.8	3	7420	6690.8	8082.3	3	1	114945	C1phos_Slot2-13_1_1308.d	19	4	2	2	3	3	5	P20396|TRH_HUMAN	Phosphorylation (STY)	S9:Phosphorylation (STY):32.28	PEAKS DB
RLGPLSAEGTTGLAPAGQTS(+79.97)EESRPR	74.03	2717.31	26	-2.3	680.336	67.18	0.9028-0.9310	8124.1	11377	11348	3	8544.6	0	21056	2	3	92453	C3phos_Slot2-15_1_1310.d	12	2	2	3	3	0	2	P22105|TENX_HUMAN	Phosphorylation (STY)	S20:Phosphorylation (STY):12.28	PEAKS DB
LPVGSQC(+57.02)SVDLESAS(+79.97)GEK	96.28	1941.84	18	3.7	971.933	66.61	1.0994-1.1274	5699.1	3717.2	38955	3	11396	9964.4	14547	3	3	91724	C3phos_Slot2-15_1_1310.d	13	1	1	5	2	2	2	P24821|TENA_HUMAN	Carbamidomethylation; Phosphorylation (STY)	C7:Carbamidomethylation:1000.00;S15:Phosphorylation (STY):55.92	PEAKS DB
SSAINEEDGS(+79.97)SEEGVVINAGK	79.73	2170.93	21	1.2	1086.47	65.3	1.1374-1.1654	5849	4117.6	5767.9	3	4312.9	4384.6	5548.3	3	2	60812	C2phos_Slot2-14_1_1309.d	22	6	2	4	4	2	4	Q9BUN1|MENT_HUMAN	Phosphorylation (STY)	S10:Phosphorylation (STY):27.96	PEAKS DB
QNLLAPQNAVS(+79.97)S(+79.97)EETNDFKQETLPSK	72.61	3047.35	26	2	1016.8	87.24	1.0422-1.0703	1267.2	695.31	801.3	3	1638.3	4373.7	2539.6	3	5	126359	P2phos_Slot2-11_1_1306.d	9	1	1	1	1	3	2	P10451|OSTP_HUMAN	Phosphorylation (STY)	S11:Phosphorylation (STY):25.70;S12:Phosphorylation (STY):28.36	PEAKS DB
SPVSKS(+79.97)PVEEK	67.59	1265.59	11	6.2	633.808	25.71	0.8836-0.9118	4061.6	13142	11082	3	13093	9161.3	12749	3	5	27413	P2phos_Slot2-11_1_1306.d	13	1	3	2	3	2	2	P07197|NFM_HUMAN	Phosphorylation (STY)	S6:Phosphorylation (STY):67.96	PEAKS DB
VTEPISAES(+79.97)GEQVERVNEPSILEMSR	88.47	2965.37	26	3.9	989.472	89.91	0.9996-1.0276	8423.3	7413.5	42649	3	9056.1	8877.5	11426	3	3	132107	C3phos_Slot2-15_1_1310.d	21	2	3	7	4	2	3	O14791|APOL1_HUMAN	Phosphorylation (STY)	S9:Phosphorylation (STY):101.94	PEAKS DB
NPGTSTTPSQPNS(+79.97)AGVQDTEMGPC(+57.02)RR	85.57	2824.19	26	0.4	942.406	49.74	0.9265-0.9546	10617	6815.7	4972.2	3	10671	9267.7	9309.8	3	1	48868	C1phos_Slot2-13_1_1308.d	15	3	2	2	4	3	1	P24592|IBP6_HUMAN	Phosphorylation (STY); Carbamidomethylation	S13:Phosphorylation (STY):49.79;C24:Carbamidomethylation:1000.00	PEAKS DB
MADEAGS(+79.97)EADHEGTHSTK	71.02	1951.73	18	1.9	976.872	22.05	1.1285-1.1564	5271.3	3378.1	5151.2	3	3172.4	5179.3	4325.8	3	4	19044	P1phos_Slot2-10_1_1305.d	19	4	2	3	3	3	4	P02671|FIBA_HUMAN	Phosphorylation (STY)	S7:Phosphorylation (STY):120.29	PEAKS DB
ESVPEFPLS(+79.97)PPK	61.65	1405.65	12	-3.2	703.833	93.61	0.9265-0.9546	4778.7	5098.4	4960.3	3	6294.9	4722.6	11975	3	3	139285	C3phos_Slot2-15_1_1310.d	6	1	1	1	1	1	1	P16949|STMN1_HUMAN	Phosphorylation (STY)	S9:Phosphorylation (STY):111.09	PEAKS DB
FRRPDIQYPDAT(+79.97)DEDIT(+79.97)SHMES(+79.97)EELNGAYK	57.41	3766.49	30	-1	1256.51	91.47	1.0882-1.1162	9094.5	4675.6	0	2	16177	0	32173	2	6	139862	P3phos_Slot2-12_1_1307.d	10	2	1	0	2	0	5	P10451|OSTP_HUMAN	Phosphorylation (STY)	T12:Phosphorylation (STY):9.45;T17:Phosphorylation (STY):0.00;S22:Phosphorylation (STY):11.12	PEAKS DB
EAAEEKEEEPEAEEEEVAAKKS(+79.97)PVK	69.54	2864.29	25	-2	717.077	45.02	0.9265-0.9546	432.33	4105.7	6506.1	3	11711	3881.7	7168.6	3	4	61788	P1phos_Slot2-10_1_1305.d	16	1	2	4	3	3	3	P07197|NFM_HUMAN	Phosphorylation (STY)	S22:Phosphorylation (STY):1000.00	PEAKS DB
GAGDGS(+79.97)DEEVDGKADGAEAKPAE	77.01	2253.89	23	-0.2	1127.96	35.94	1.1307-1.1587	1285.3	1304.2	1853.5	3	1506.3	4837.4	5984.9	3	6	44603	P3phos_Slot2-12_1_1307.d	30	4	4	3	3	7	9	P35579|MYH9_HUMAN	Phosphorylation (STY)	S6:Phosphorylation (STY):1000.00	PEAKS DB
EVS(+79.97)DDEAEEKEDKEEEK	74.94	2116.82	17	1.9	706.615	23.53	0.8622-0.8904	3367.9	3264.8	12058	3	10195	5124.8	11078	3	4	21607	P1phos_Slot2-10_1_1305.d	24	2	1	5	6	2	8	P07900|HS90A_HUMAN	Phosphorylation (STY)	S3:Phosphorylation (STY):1000.00	PEAKS DB
GEVQAMLGQST(+79.97)EELRVR	56.48	1981.93	17	1.5	991.973	80.75	1.2044-1.2323	40948	27017	31717	3	53573	44599	51642	3	2	81673	C2phos_Slot2-14_1_1309.d	17	2	2	1	3	4	5	P02649|APOE_HUMAN	Phosphorylation (STY)	T11:Phosphorylation (STY):30.46	PEAKS DB
EVVTS(+79.97)EDGSDC(+57.02)PEAM(+15.99)DLGTLSGIGTLDGFR	140.88	3223.36	30	-3.4	1075.46	101.67	1.0142-1.0422	590.8	439.65	7056.6	3	1763.4	2793.4	588.63	3	3	157654	C3phos_Slot2-15_1_1310.d	30	3	4	9	2	8	4	P02671|FIBA_HUMAN	Phosphorylation (STY); Carbamidomethylation; Oxidation (M)	S5:Phosphorylation (STY):33.98;C11:Carbamidomethylation:1000.00;M15:Oxidation (M):1000.00	PEAKS DB
RRDAEYGAS(+79.97)PEQVADNGDDHSEGGLVENHVDSTMNMLGGGGSAGR	115.46	4693.98	45	-2.7	939.803	88.38	0.9197-0.9478	426.7	888.44	2207.7	3	2576.2	538.92	1828.9	3	6	134188	P3phos_Slot2-12_1_1307.d	8	1	1	1	3	1	1	P18065|IBP2_HUMAN	Phosphorylation (STY)	S9:Phosphorylation (STY):7.77	PEAKS DB
GWRVPGPAEGPAEPAAEAS(+79.97)DEAER	86.49	2528.1	24	0	843.708	71.41	0.9163-0.9445	2256.7	1948.8	1695.2	3	3138	1526.2	2409.5	3	1	80295	C1phos_Slot2-13_1_1308.d	17	2	4	3	3	2	3	Q24JP5|T132A_HUMAN	Phosphorylation (STY)	S19:Phosphorylation (STY):1000.00	PEAKS DB
VTEPIS(+79.97)AES(+79.97)GEQVER	75.86	1789.72	15	-1.5	895.867	54.29	1.0041-1.0321	545.48	341.22	1148.1	3	826.47	975.86	1135	3	5	76654	P2phos_Slot2-11_1_1306.d	6	1	1	1	1	1	1	O14791|APOL1_HUMAN	Phosphorylation (STY)	S6:Phosphorylation (STY):88.98;S9:Phosphorylation (STY):142.27	PEAKS DB
HLKFRIS(+79.97)HELDS(+79.97)AS(+79.97)SEVN	36.47	2307.93	18	-5.7	770.316	84.46	0.8498-0.8780	0			0	2686.5	4266.6	2305.8	3	5	122595	P2phos_Slot2-11_1_1306.d	8	0	0	0	3	3	2	P10451|OSTP_HUMAN	Phosphorylation (STY)	S7:Phosphorylation (STY):29.57;S12:Phosphorylation (STY):28.36;S14:Phosphorylation (STY):17.01	PEAKS DB
RDHHS(+79.97)T(+79.97)HYRASEEEPEYGEEIK	57.79	2858.13	22	-9.3	715.536	62.23	0.8532-0.8814	30854	13605	5643	3	11605	8474.5	4725.6	3	5	88139	P2phos_Slot2-11_1_1306.d	17	5	2	2	4	2	2	P05060|SCG1_HUMAN	Phosphorylation (STY)	S5:Phosphorylation (STY):12.33;T6:Phosphorylation (STY):8.22	PEAKS DB
FRRPDIQYPDAT(+79.97)DEDIT(+79.97)SHMESEELNGAYK	54.16	3686.53	30	-5.8	1229.85	90.97	1.1117-1.1397	5083.4	1165.3	9757.9	3	19243	1098.9	28629	3	6	138709	P3phos_Slot2-12_1_1307.d	12	1	1	2	2	1	5	P10451|OSTP_HUMAN	Phosphorylation (STY)	T12:Phosphorylation (STY):25.70;T17:Phosphorylation (STY):0.00	PEAKS DB
S(+79.97)LHNRELSAERPLNEQIAEAEEDK	54.01	2857.32	24	-2.8	715.338	76.55	0.9017-0.9298	92043	74611	4121.3	3	32061	21345	71782	3	3	107709	C3phos_Slot2-15_1_1310.d	18	5	4	1	2	3	3	Q8WXD2|SCG3_HUMAN	Phosphorylation (STY)	S1:Phosphorylation (STY):8.82	PEAKS DB
LPIVNFDYS(+79.97)M(+15.99)EEK	76.62	1679.72	13	5.5	840.872	98.75	1.0321-1.0602	5012.5	2334.5	5171.6	3	7092.5	3965.4	6915.5	3	5	143899	P2phos_Slot2-11_1_1306.d	23	3	4	4	3	4	5	O94769|ECM2_HUMAN	Phosphorylation (STY); Oxidation (M)	S9:Phosphorylation (STY):33.98;M10:Oxidation (M):1000.00	PEAKS DB
ANDESNEHSDVIDS(+79.97)QELSK	88.54	2195.89	19	-4.7	732.968	49.68	0.8181-0.8464	6114	5949.1	2646.2	3	8713.5	7156.3	29090	3	5	69316	P2phos_Slot2-11_1_1306.d	20	3	2	2	5	4	4	P10451|OSTP_HUMAN	Phosphorylation (STY)	S14:Phosphorylation (STY):58.99	PEAKS DB
VPEARPNS(+79.97)M(+15.99)VVEHPEFLK	63.55	2174.02	18	1.3	725.683	67.68	0.9298-0.9580	224.97	234.13	331.11	3	259.94	728.57	1024	3	4	105854	P1phos_Slot2-10_1_1305.d	22	4	2	4	3	4	5	P06396|GELS_HUMAN	Phosphorylation (STY); Oxidation (M)	S8:Phosphorylation (STY):1000.00;M9:Oxidation (M):1000.00	PEAKS DB
EALQS(+79.97)EEDEEVKEEDTEQKRETPESR	83.35	3199.37	26	-2.1	800.847	50.89	0.9084-0.9366	20919	10098	15967	3	22813	20528	23781	3	2	41936	C2phos_Slot2-14_1_1309.d	16	2	1	2	3	3	5	O94769|ECM2_HUMAN	Phosphorylation (STY)	S5:Phosphorylation (STY):134.40	PEAKS DB
GKDS(+79.97)YETSQLDDQS(+79.97)AETHSHK	68.94	2521.96	21	0	841.662	36.59	0.8814-0.9096	1709.7	2191.8	2308.5	3	4751.3	3126.9	7026.4	3	4	45282	P1phos_Slot2-10_1_1305.d	10	2	1	2	2	1	2	P10451|OSTP_HUMAN	Phosphorylation (STY)	S4:Phosphorylation (STY):33.98;S14:Phosphorylation (STY):28.36	PEAKS DB
DAEYGAS(+79.97)PEQVADNGDDHSEGGLVENHVDSTM(+15.99)NMLGGGGSAGRKPLK	67.02	4864.1	47	3.4	973.83	79.03	1.0624-1.0904	0	0	0	0	1824.1	134.6	277.51	3	4	129575	P1phos_Slot2-10_1_1305.d	6	0	0	0	4	1	1	P18065|IBP2_HUMAN	Phosphorylation (STY); Oxidation (M)	S7:Phosphorylation (STY):47.09;M32:Oxidation (M):14.04	PEAKS DB
VTEPISAES(+79.97)GEQVERVNEPSILEM(+15.99)SR	83.81	2981.37	26	0.7	994.8	81.23	0.9827-1.0108	3127.7	1505.3	26750	3	793.36	3551	2880.8	3	3	116602	C3phos_Slot2-15_1_1310.d	12	1	1	5	1	2	2	O14791|APOL1_HUMAN	Phosphorylation (STY); Oxidation (M)	S9:Phosphorylation (STY):78.06;M24:Oxidation (M):1000.00	PEAKS DB
KANDES(+79.97)NEHSDVIDSQELSK	76.03	2323.98	20	-1.8	775.668	47.22	0.8622-0.8904	2316.8	2560	1499	3	5130.5	3976.2	8969.7	3	5	65379	P2phos_Slot2-11_1_1306.d	12	1	2	1	3	2	3	P10451|OSTP_HUMAN	Phosphorylation (STY)	S6:Phosphorylation (STY):43.39	PEAKS DB
GEVQAM(+15.99)LGQST(+79.97)EELRVR	54.38	1997.92	17	-5.9	666.979	64.81	0.8498-0.8780	14505	6442.8	25334	3	0	14848	15606	2	1	70550	C1phos_Slot2-13_1_1308.d	20	3	3	4	0	6	4	P02649|APOE_HUMAN	Oxidation (M); Phosphorylation (STY)	M6:Oxidation (M):1000.00;T11:Phosphorylation (STY):12.28	PEAKS DB
LPIVNFDY(+79.97)S(+79.97)M(+15.99)EEK	53.01	1759.68	13	0.1	880.848	98.74	1.0647-1.0927	3117.9	2947.6	1177.3	3		3404.9	704.13	2	2	106479	C2phos_Slot2-14_1_1309.d	6	1	2	1	0	1	1	O94769|ECM2_HUMAN	Phosphorylation (STY); Oxidation (M)	Y8:Phosphorylation (STY):1000.00;S9:Phosphorylation (STY):1000.00;M10:Oxidation (M):1000.00	PEAKS DB
SGELEQEEERLS(+79.97)K	68.72	1612.7	13	2.9	807.361	47.06	0.9984-1.0265	8517.8	7609.4	1182.4	3	8060.9	6333.3	8115.8	3	5	64916	P2phos_Slot2-11_1_1306.d	15	3	5	1	2	2	2	P10645|CMGA_HUMAN	Phosphorylation (STY)	S12:Phosphorylation (STY):215.31	PEAKS DB
SPPEAKS(+79.97)PEKEEAK	60.91	1605.73	14	-0.8	803.873	20.49	0.9973-1.0254	809.16	2364.7	3279.8	3	5140	2089.5	5653.8	3	5	18564	P2phos_Slot2-11_1_1306.d	16	2	2	3	3	2	4	P12036|NFH_HUMAN	Phosphorylation (STY)	S7:Phosphorylation (STY):90.32	PEAKS DB
FRRPDIQY(+79.97)PDAT(+79.97)DEDITSHMES(+79.97)EELNGAYK	58.12	3766.49	30	0.6	1256.51	90.96	1.0904-1.1184	9094.5	0	0	1	13902	14607	7033.8	3	4	154167	P1phos_Slot2-10_1_1305.d	8	2	0	0	2	3	1	P10451|OSTP_HUMAN	Phosphorylation (STY)	Y8:Phosphorylation (STY):23.56;T12:Phosphorylation (STY):17.91;S22:Phosphorylation (STY):11.12	PEAKS DB
HIQETEWQS(+79.97)QEGK	77.57	1678.7	13	2.5	840.361	41.44	0.9838-1.0119	6866.9	7983.1	2084	3	8445.5	7880.2	9560.7	3	1	36316	C1phos_Slot2-13_1_1308.d	9	1	2	1	2	1	2	Q14515|SPRL1_HUMAN	Phosphorylation (STY)	S9:Phosphorylation (STY):111.84	PEAKS DB
VTEPIS(+79.97)AES(+79.97)GEQVERVNEPSILEM(+15.99)SR	72.79	3061.34	26	-1.9	1021.45	85.18	0.9782-1.0063	1803.1	266.18	2792	3	0	390.68	1165.8	2	3	123613	C3phos_Slot2-15_1_1310.d	8	3	1	1	0	1	2	O14791|APOL1_HUMAN	Phosphorylation (STY); Oxidation (M)	S6:Phosphorylation (STY):61.69;S9:Phosphorylation (STY):50.34;M24:Oxidation (M):1000.00	PEAKS DB
ES(+79.97)NEELTESC(+57.02)ETK	72.43	1634.6	13	2.2	818.312	35.95	0.9670-0.9951	8237.4	5889.6	13198	3	6012.1	7080.3	7349.2	3	3	41942	C3phos_Slot2-15_1_1310.d	15	2	2	3	3	3	2	P01042|KNG1_HUMAN	Phosphorylation (STY); Carbamidomethylation	S2:Phosphorylation (STY):115.49;C10:Carbamidomethylation:1000.00	PEAKS DB
KEALQS(+79.97)EEDEEVKEEDTEQKR	70.3	2628.14	21	-1.1	877.056	45.1	0.9793-1.0074	3506.7	2202.1	2317.2	3	2468.4	3057.9	4512.3	3	1	42168	C1phos_Slot2-13_1_1308.d	17	3	3	2	4	2	3	O94769|ECM2_HUMAN	Phosphorylation (STY)	S6:Phosphorylation (STY):156.03	PEAKS DB
FRDEVEDDY(+79.97)IKS(+79.97)WEDNQQGDEALDTTK	64.64	3405.36	27	-3	1136.12	84.19	0.9827-1.0108	1540.7	1946.9	694.24	3		1450.7	1302.7	2	2	86450	C2phos_Slot2-14_1_1309.d	8	3	1	2	0	1	1	Q92563|TICN2_HUMAN	Phosphorylation (STY)	Y9:Phosphorylation (STY):70.72;S12:Phosphorylation (STY):66.48	PEAKS DB
AKS(+79.97)PVPKS(+79.97)PVEEAK	62.41	1625.75	14	-0.4	813.882	35.42	0.9703-0.9984	319.67	1048.6	661.39	3	1482.9	1127.9	1173.2	3	5	46041	P2phos_Slot2-11_1_1306.d	7	1	1	1	2	1	1	P07197|NFM_HUMAN	Phosphorylation (STY)	S3:Phosphorylation (STY):1000.00;S8:Phosphorylation (STY):1000.00	PEAKS DB
LPGMEYVDGDFQC(+57.02)HTFDSS(+79.97)NVE	83.44	2626	22	0.7	1314.01	99.48	1.2613-1.2891	31847	22659	33376	3	16323	31049	23437	3	5	144452	P2phos_Slot2-11_1_1306.d	24	6	3	6	4	3	2	P24593|IBP5_HUMAN	Carbamidomethylation; Phosphorylation (STY)	C13:Carbamidomethylation:1000.00;S19:Phosphorylation (STY):17.01	PEAKS DB
ADEPS(+79.97)S(+79.97)EES(+79.97)DLEIDK	78.35	1902.61	15	2	952.317	67.07	1.0366-1.0647	303.57		218.29	2		569.65	1819	2	6	96277	P3phos_Slot2-12_1_1307.d	6	2	0	2	0	1	1	P50502|F10A1_HUMAN	Phosphorylation (STY)	S5:Phosphorylation (STY):1000.00;S6:Phosphorylation (STY):1000.00;S9:Phosphorylation (STY):1000.00	PEAKS DB
GSEEYRAPRPQS(+79.97)EESWDEEDK	76.59	2603.04	21	2.5	868.691	53.81	0.9129-0.9411	21965	12194	7691.7	3	12511	7255.8	14174	3	4	78836	P1phos_Slot2-10_1_1305.d	19	6	2	2	4	1	4	P05060|SCG1_HUMAN	Phosphorylation (STY)	S12:Phosphorylation (STY):62.26	PEAKS DB
RNYPS(+79.97)LELDK	59.82	1313.6	10	-2.7	657.808	61.67	0.9028-0.9310	5568.2	5315.3	3522.1	3	2772.4	3707.5	4605.5	3	5	87451	P2phos_Slot2-11_1_1306.d	11	1	3	1	1	2	3	P05060|SCG1_HUMAN	Phosphorylation (STY)	S5:Phosphorylation (STY):48.87	PEAKS DB
RPDIQYPDAT(+79.97)DEDIT(+79.97)S(+79.97)HMESEELNGAYK	50.13	3463.32	28	0.5	1155.45	92.47	1.0299-1.0579	1469.4		5540.1	2	0	8662	10688	2	3	136496	C3phos_Slot2-15_1_1310.d	7	1	0	2	0	2	2	P10451|OSTP_HUMAN	Phosphorylation (STY)	T10:Phosphorylation (STY):11.59;T15:Phosphorylation (STY):7.81;S16:Phosphorylation (STY):7.40	PEAKS DB
MQEDEFDQGNQEQEDNS(+79.97)NAEM(+15.99)EEENASNVNK	109.34	3697.36	31	0.3	1233.46	57.02	1.0377-1.0658	736.57	755.7	455.97	3	1230.9	1143.7	896	3	6	80269	P3phos_Slot2-12_1_1307.d	7	1	1	1	1	2	1	Q14515|SPRL1_HUMAN	Phosphorylation (STY); Oxidation (M)	S17:Phosphorylation (STY):94.89;M21:Oxidation (M):76.28	PEAKS DB
LSPHAFKTES(+79.97)GEETDLISPPQEEVK	79.04	2847.32	25	-0.6	950.116	76.83	0.9647-0.9928	16265	11367	11447	3	12193	11431	9912	3	5	110347	P2phos_Slot2-11_1_1306.d	11	2	3	2	2	1	1	O43493|TGON2_HUMAN	Phosphorylation (STY)	S10:Phosphorylation (STY):9.40	PEAKS DB
NQGQLYSEGDS(+79.97)RGGDRK	59.13	1945.83	17	1.4	649.617	28.1	0.8023-0.8306	8440.8	6900.5	7713.8	3	5727.3	7388.5	9143.6	3	2	12471	C2phos_Slot2-14_1_1309.d	13	1	2	4	2	2	2	O94769|ECM2_HUMAN	Phosphorylation (STY)	S11:Phosphorylation (STY):49.79	PEAKS DB
VTTVASHTS(+79.97)DSDVPSGVTEVVVK	73.49	2393.14	23	-4.2	798.718	74.06	0.8735-0.9017	25623	27362	8869.3	3	34082	17548	7903	3	6	108757	P3phos_Slot2-12_1_1307.d	24	3	5	3	4	6	3	P10909|CLUS_HUMAN	Phosphorylation (STY)	S9:Phosphorylation (STY):14.02	PEAKS DB
LYGSAGPPPTGEEDT(+79.97)AEKDEL	69.3	2254.95	21	-0.5	1128.49	68.39	1.1631-1.1911	3460.9	2618.2	3942.8	3	4096.6	4279.7	4678.2	3	3	94997	C3phos_Slot2-15_1_1310.d	12	2	2	2	2	2	2	P11021|BIP_HUMAN	Phosphorylation (STY)	T15:Phosphorylation (STY):50.40	PEAKS DB
ISGVIGPYRETVDS(+79.97)VERK	54.72	2084.03	18	-2.3	695.684	68.74	0.8836-0.9118	8490.7	4298	6896.5	3	4243.9	6505.6	7263.2	3	3	95109	C3phos_Slot2-15_1_1310.d	16	3	1	3	3	3	3	P07942|LAMB1_HUMAN	Phosphorylation (STY)	S14:Phosphorylation (STY):49.37	PEAKS DB
LVGGPM(+15.99)DAS(+79.97)VEEEGVRR	54.58	1895.84	17	3.9	948.933	51.47	1.0658-1.0938	4097.3	3054.5	3702.6	3	4880.2	6143.2	4943.3	3	4	74516	P1phos_Slot2-10_1_1305.d	23	5	2	5	2	4	5	P01034|CYTC_HUMAN	Oxidation (M); Phosphorylation (STY)	M6:Oxidation (M):1000.00;S9:Phosphorylation (STY):1000.00	PEAKS DB
QADVPAAVTAAAATT(+79.97)PAAEDAAAK	87.92	2261.06	24	1.3	1131.54	71.45	1.2145-1.2424	2316.6	2328.5	1645.8	3	1905.9	1681.2	2152.2	3	2	68476	C2phos_Slot2-14_1_1309.d	19	3	3	3	3	3	4	P17677|NEUM_HUMAN	Phosphorylation (STY)	T15:Phosphorylation (STY):27.96	PEAKS DB
DSYETS(+79.97)QLDDQS(+79.97)AETHSHK	70.03	2336.85	19	-6	779.954	42.71	0.8328-0.8611	743.61	0	617.18	2	2450.3	1536.1	3493.4	3	6	56088	P3phos_Slot2-12_1_1307.d	12	2	0	1	4	2	3	P10451|OSTP_HUMAN	Phosphorylation (STY)	S6:Phosphorylation (STY):33.98;S12:Phosphorylation (STY):29.32	PEAKS DB
S(+79.97)QEES(+79.97)EEGEEDATSEVDKR	61.25	2312.82	19	2.7	1157.42	42.66	1.1274-1.1553	525.69	434.57	415.34	3	435.83	297.15	390	3	3	52688	C3phos_Slot2-15_1_1310.d	7	2	1	1	1	1	1	P05060|SCG1_HUMAN	Phosphorylation (STY)	S1:Phosphorylation (STY):26.38;S5:Phosphorylation (STY):35.10	PEAKS DB
DHHS(+79.97)T(+79.97)HYRASEEEPEYGEEIK	47.15	2702.03	21	-5.4	676.512	48	0.8238-0.8520	8941.5	589.42	5476.3	3	4106	3190.5	930.43	3	4	67564	P1phos_Slot2-10_1_1305.d	10	2	2	2	1	1	2	P05060|SCG1_HUMAN	Phosphorylation (STY)	S4:Phosphorylation (STY):5.77;T5:Phosphorylation (STY):7.32	PEAKS DB
S(+79.97)QEES(+79.97)EEGEEDATSEVDK	96.35	2156.72	18	2.3	1079.37	44.77	1.1095-1.1374	662.84	602.75	409.58	3	318.48	422.5	556.2	3	2	34444	C2phos_Slot2-14_1_1309.d	6	1	1	1	1	1	1	P05060|SCG1_HUMAN	Phosphorylation (STY)	S1:Phosphorylation (STY):154.09;S5:Phosphorylation (STY):150.77	PEAKS DB
M(+15.99)IGFPSSAGSVS(+79.97)PR	82.75	1487.65	14	1	744.834	70.7	0.9535-0.9816	629.29	1383.9	7380.1	3	2115.4	1433.7	11818	3	3	98311	C3phos_Slot2-15_1_1310.d	13	1	1	3	1	1	6	P13646|K1C13_HUMAN	Oxidation (M); Phosphorylation (STY)	M1:Oxidation (M):1000.00;S12:Phosphorylation (STY):46.20	PEAKS DB
EELVARSETHAAGHS(+79.97)QEK	69.74	2057.92	18	-2.8	686.978	30.08	0.8272-0.8554	4837.1	3633.2	1828.9	3	546.01	1322.2	91.154	3	2	14828	C2phos_Slot2-14_1_1309.d	15	6	3	1	1	3	1	P05060|SCG1_HUMAN	Phosphorylation (STY)	S15:Phosphorylation (STY):95.35	PEAKS DB
RPDIQYPDATDEDITSHMES(+79.97)EELNGAYK	69.06	3303.39	28	-3	826.855	86.47	0.8633-0.8915	2067.6	3379.4	2879.7	3	198.38	3112	2120.8	3	3	125793	C3phos_Slot2-15_1_1310.d	10	1	1	3	1	1	3	P10451|OSTP_HUMAN	Phosphorylation (STY)	S20:Phosphorylation (STY):29.98	PEAKS DB
KANDES(+79.97)NEHSDVIDS(+79.97)QELSK	59.13	2403.95	20	-1.6	802.322	47.39	0.8633-0.8915	452.24	657.38	315.78	3	1498.8	1572.2	3227.1	3	4	65832	P1phos_Slot2-10_1_1305.d	14	2	2	2	2	3	3	P10451|OSTP_HUMAN	Phosphorylation (STY)	S6:Phosphorylation (STY):42.68;S15:Phosphorylation (STY):42.68	PEAKS DB
FRRPDIQYPDATDEDIT(+79.97)S(+79.97)HMES(+79.97)EELNGAYK	44.65	3766.49	30	0.4	1256.51	91.09	1.0658-1.0938	0	5441		1	13834	14460	10958	3	4	154410	P1phos_Slot2-10_1_1305.d	8	0	1	0	1	3	3	P10451|OSTP_HUMAN	Phosphorylation (STY)	T17:Phosphorylation (STY):11.67;S18:Phosphorylation (STY):12.71;S22:Phosphorylation (STY):13.18	PEAKS DB
EFHS(+79.97)HEFHS(+79.97)HEDM(+15.99)LVVDPK	42.45	2494.97	19	-12.1	624.743	65.44	0.8023-0.8306	19.678	0	0	1	547.35	359.68	471.16	3	5	93015	P2phos_Slot2-11_1_1306.d	7	1	0	0	2	2	2	P10451|OSTP_HUMAN	Phosphorylation (STY); Oxidation (M)	S4:Phosphorylation (STY):1000.00;S9:Phosphorylation (STY):1000.00;M13:Oxidation (M):1000.00	PEAKS DB
EVVT(+79.97)SEDGSDC(+57.02)PEAM(+15.99)DLGTLSGIGTLDGFR	104.12	3223.36	30	0.3	1075.46	101.76	1.0052-1.0333	314.19	184.96	3498.4	3	1356.4	1305	217.65	3	5	151616	P2phos_Slot2-11_1_1306.d	18	2	3	5	2	4	2	P02671|FIBA_HUMAN	Phosphorylation (STY); Carbamidomethylation; Oxidation (M)	T4:Phosphorylation (STY):14.02;C11:Carbamidomethylation:1000.00;M15:Oxidation (M):1000.00	PEAKS DB
AVPPGS(+79.97)REVSTWNLDTLAFQELK	81.16	2637.28	23	-2.2	880.102	100.96	0.9129-0.9411	3129.8	3278.2	2071.1	3	5573.4	5573.2	5373.6	3	5	149692	P2phos_Slot2-11_1_1306.d	20	2	3	3	3	4	5	Q99972|MYOC_HUMAN	Phosphorylation (STY)	S6:Phosphorylation (STY):67.69	PEAKS DB
SPAEVKS(+79.97)PEK	68.49	1150.53	10	-0.6	576.272	20.49	0.8362-0.8644	2439.9	8052	6169.9	3	6513.1	5342.5	8505.6	3	5	18817	P2phos_Slot2-11_1_1306.d	6	1	1	1	1	1	1	P12036|NFH_HUMAN	Phosphorylation (STY)	S7:Phosphorylation (STY):151.86	PEAKS DB
ETT(+79.97)C(+57.02)SKESNEELTESC(+57.02)ETKK	57.16	2468.99	20	-0.6	1235.51	30.1	1.1978-1.2256	454.45		16330	2	5651.1	35974	576.29	3	3	32078	C3phos_Slot2-15_1_1310.d	20	6	0	5	3	4	2	P01042|KNG1_HUMAN	Phosphorylation (STY); Carbamidomethylation	T3:Phosphorylation (STY):10.19;C4:Carbamidomethylation:1000.00;C16:Carbamidomethylation:1000.00	PEAKS DB
LPIVNFDYS(+79.97)MEEK	85.79	1663.72	13	2.3	832.872	101.13	1.0602-1.0882	4025.6	3643.1	2995.6	3	9487.9	7194.8	7102.7	3	5	149958	P2phos_Slot2-11_1_1306.d	16	2	3	3	2	2	4	O94769|ECM2_HUMAN	Phosphorylation (STY)	S9:Phosphorylation (STY):30.46	PEAKS DB
GHC(+57.02)ANS(+79.97)C(+57.02)ERGDTTTLYSQGGHGHDPK	83.49	2921.16	26	1.2	731.298	36.91	0.8893-0.9174	5620.7	2548.1	3879.3	3	5975	6265.3	9491.3	3	4	46201	P1phos_Slot2-10_1_1305.d	19	2	1	2	6	3	5	Q14767|LTBP2_HUMAN	Carbamidomethylation; Phosphorylation (STY)	C3:Carbamidomethylation:1000.00;S6:Phosphorylation (STY):23.62;C7:Carbamidomethylation:1000.00	PEAKS DB
VPGPAEGPAEPAAEAS(+79.97)DEAERR	69.5	2285	22	-1.2	762.672	49.03	0.9050-0.9332	5242	3271.2	2982.6	3	4452.8	2940.2	4212.7	3	2	39358	C2phos_Slot2-14_1_1309.d	17	4	2	3	3	2	3	Q24JP5|T132A_HUMAN	Phosphorylation (STY)	S16:Phosphorylation (STY):1000.00	PEAKS DB
EAPAEGEAAEPGS(+79.97)PTAAEGEAASAASSTSSPK	97.58	2994.26	32	0.9	999.097	63.68	1.1330-1.1609	2942.5	2207.1	3496.2	3	4615.2	1158.7	4176	3	1	68751	C1phos_Slot2-13_1_1308.d	22	5	3	4	5	2	3	P29966|MARCS_HUMAN	Phosphorylation (STY)	S13:Phosphorylation (STY):20.41	PEAKS DB
ERDKEVS(+79.97)DDEAEEK	67.39	1757.7	14	0.7	586.907	18.6	0.7831-0.8113	1930.7	1651.4	6175.6	3	2297.7	1060.9	6379	3	4	13768	P1phos_Slot2-10_1_1305.d	11	2	3	2	1	1	2	P07900|HS90A_HUMAN	Phosphorylation (STY)	S7:Phosphorylation (STY):1000.00	PEAKS DB
FRRPDIQYPDAT(+79.97)DEDITSHMES(+79.97)EELNGAYK	61.23	3686.53	30	2.4	1229.86	92.99	1.0983-1.1262	5083.4	13438	6116.6	3	5783.4	0	9478.6	2	6	141799	P3phos_Slot2-12_1_1307.d	6	1	2	1	1	0	1	P10451|OSTP_HUMAN	Phosphorylation (STY)	T12:Phosphorylation (STY):4.75;S22:Phosphorylation (STY):10.19	PEAKS DB
IERDS(+79.97)REHEEPTTSEM(+15.99)AEETYSPK	87.26	2946.22	24	-5	737.561	43.33	0.8181-0.8464	1877.8	2782.3	1857.9	3	5416.2	4166.1	5290	3	3	53873	C3phos_Slot2-15_1_1310.d	18	3	2	1	4	4	4	P24593|IBP5_HUMAN	Phosphorylation (STY); Oxidation (M)	S5:Phosphorylation (STY):26.08;M16:Oxidation (M):1000.00	PEAKS DB
DAEYGASPEQVADNGDDHS(+79.97)EGGLVENHVDSTMNMLGGGGSAGRKPLK	73.43	4848.1	47	-12.9	970.617	88.94	1.0243-1.0523	0	0	1398.9	1	0	0	53.464	1	1	107356	C1phos_Slot2-13_1_1308.d	2	0	0	1	0	0	1	P18065|IBP2_HUMAN	Phosphorylation (STY)	S19:Phosphorylation (STY):24.01	PEAKS DB
S(+42.01)(+79.97)ALQAAKDQFNEGR	33.26	1655.73	14	-0.7	828.874	68.92	0.9703-0.9984	2451.8	2059.8	3484.9	3	10400	4445.5	5939.7	3	6	100645	P3phos_Slot2-12_1_1307.d	10	1	1	1	1	1	5	Q99758|ABCA3_HUMAN	Acetylation (Protein N-term); Phosphorylation (STY)	S1:Acetylation (Protein N-term):1000.00;S1:Phosphorylation (STY):1000.00	PEAKS DB
GVEFVC(+57.02)C(+57.02)PLAEES(+79.97)DNVDS(+79.97)ADAEEDDSDVWWGGADTDYADGSEDK	125.73	4985.82	44	3.7	1662.96	103.17	1.2301-1.2579	0	0	0	0	0	0	0	0	1	130993	C1phos_Slot2-13_1_1308.d	0	0	0	0	0	0	0	P05067|A4_HUMAN	Carbamidomethylation; Phosphorylation (STY)	C6:Carbamidomethylation:1000.00;C7:Carbamidomethylation:1000.00;S13:Phosphorylation (STY):82.05;S18:Phosphorylation (STY):99.62	PEAKS DB
AIPVAQDLNAPSDWDS(+79.97)RGKDSYET(+79.97)SQLDDQS(+79.97)AETHSHK	104.96	4437.81	38	1	1110.46	80.27	0.9523-0.9805			0	0	0	112.81	0	1	4	132249	P1phos_Slot2-10_1_1305.d	1	0	0	0	0	1	0	P10451|OSTP_HUMAN	Phosphorylation (STY)	S16:Phosphorylation (STY):5.55;T24:Phosphorylation (STY):0.00;S31:Phosphorylation (STY):16.66	PEAKS DB
VVDYSQFQES(+79.97)DDADEDYGRDSGPPTK	98.91	2999.2	26	-3.3	1000.74	65.56	0.9760-1.0041	343.37	266.39	1111.2	3	765.6	1719.5	2810.1	3	5	93088	P2phos_Slot2-11_1_1306.d	10	1	1	3	2	1	2	Q9H1E3|NUCKS_HUMAN	Phosphorylation (STY)	S10:Phosphorylation (STY):81.69	PEAKS DB
HRHPDEAAFFDTAS(+79.97)TGK	72.1	1965.84	17	-7.2	656.283	73.68	0.7932-0.8215	5166.6	2394.4	7727.8	3	1996.4	5071.1	4741.8	3	5	105240	P2phos_Slot2-11_1_1306.d	7	1	1	1	2	1	1	P02671|FIBA_HUMAN	Phosphorylation (STY)	S14:Phosphorylation (STY):7.21	PEAKS DB
QSLGHGQHGSGSGQSPS(+79.97)PSR	71.28	2026.86	20	0.9	676.63	19.97	0.7808-0.8091	6157.9	6136.4	6896.2	3	3988.1	4449.9	5753	3	3	16096	C3phos_Slot2-15_1_1310.d	10	3	2	1	1	1	2	Q86YZ3|HORN_HUMAN	Phosphorylation (STY)	S17:Phosphorylation (STY):18.53	PEAKS DB
AEDGATPSPSNET(+79.97)PK	69.31	1579.64	15	-0.6	790.829	30.13	0.9658-0.9940	880.72	1520.5	250.07	3	2149.9	1349.1	2292.3	3	5	36302	P2phos_Slot2-11_1_1306.d	11	2	2	2	1	1	3	P29966|MARCS_HUMAN	Phosphorylation (STY)	T13:Phosphorylation (STY):32.69	PEAKS DB
IERDS(+79.97)REHEEPTTS(+79.97)EM(+15.99)AEETYSPK	66.02	3026.19	24	-2.1	757.555	43.89	0.7706-0.7989	236.92	1685.7	666.7	3	1766.1	4629.2	963.9	3	3	54541	C3phos_Slot2-15_1_1310.d	13	1	1	3	3	3	2	P24593|IBP5_HUMAN	Phosphorylation (STY); Oxidation (M)	S5:Phosphorylation (STY):34.75;S14:Phosphorylation (STY):17.01;M16:Oxidation (M):1000.00	PEAKS DB
ARISAS(+79.97)AEELR	65.52	1281.61	11	-0.6	641.811	45.98	0.8870-0.9152	3415.3	3516.9	1570.3	3	2593.9	3053.9	4943	3	2	35376	C2phos_Slot2-14_1_1309.d	6	1	1	1	1	1	1	P06727|APOA4_HUMAN	Phosphorylation (STY)	S6:Phosphorylation (STY):48.87	PEAKS DB
SPVPKS(+79.97)PVEEAK	62.17	1346.65	12	5.2	674.335	36.77	0.9028-0.9310	1986.7	6559.8	2533.5	3	6003.3	4383.2	5981.6	3	4	46068	P1phos_Slot2-10_1_1305.d	8	1	1	2	1	2	1	P07197|NFM_HUMAN	Phosphorylation (STY)	S6:Phosphorylation (STY):90.87	PEAKS DB
KEEVKS(+79.97)PVKEEEKPQEVK	60.05	2219.11	18	-1	740.709	31.24	0.9377-0.9658	317.22	1415.4	1245.7	3	1218	1080	1554.8	3	4	36301	P1phos_Slot2-10_1_1305.d	12	2	2	2	2	2	2	P12036|NFH_HUMAN	Phosphorylation (STY)	S6:Phosphorylation (STY):1000.00	PEAKS DB
TPSPKEEDEEPES(+79.97)PPEK	59.63	2003.82	17	2.5	1002.92	35.21	1.0815-1.1095	399.68	876.94	2945.6	3	3255.3	1958.9	4246	3	4	42641	P1phos_Slot2-10_1_1305.d	11	1	1	1	3	3	2	Q9H1E3|NUCKS_HUMAN	Phosphorylation (STY)	S13:Phosphorylation (STY):135.36	PEAKS DB
FRRPDIQYPDAT(+79.97)DEDITS(+79.97)HMES(+79.97)EELNGAYK	55.72	3766.49	30	-1.3	1256.51	91.94	1.1039-1.1318		4675.6	4962.8	2	0	13699	15082	2	5	133148	P2phos_Slot2-11_1_1306.d	4	0	1	1	0	1	1	P10451|OSTP_HUMAN	Phosphorylation (STY)	T12:Phosphorylation (STY):8.64;S18:Phosphorylation (STY):7.40;S22:Phosphorylation (STY):10.19	PEAKS DB
AIPVAQDLNAPS(+79.97)DWDS(+79.97)RGK	54.59	2198.94	19	1.6	1100.48	85.02	1.1453-1.1732	597.41	0	607.73	2	1280.2	1055.4	2348	3	1	100934	C1phos_Slot2-13_1_1308.d	7	1	0	1	1	2	2	P10451|OSTP_HUMAN	Phosphorylation (STY)	S12:Phosphorylation (STY):1000.00;S16:Phosphorylation (STY):1000.00	PEAKS DB
C(+57.02)DDC(+57.02)ASGYFGNPSEVGGSC(+57.02)QPC(+57.02)QC(+57.02)HNNIDT(+79.97)T(+79.97)DPEAC(+57.02)DKET(+79.97)GR	28.1	5004.72	42	-2.9	1669.25	45.06	1.2167-1.2446	0	0	0	0	0	0	0	0	6	60228	P3phos_Slot2-12_1_1307.d	0	0	0	0	0	0	0	P07942|LAMB1_HUMAN	Carbamidomethylation; Phosphorylation (STY)	C1:Carbamidomethylation:1000.00;C4:Carbamidomethylation:1000.00;C19:Carbamidomethylation:1000.00;C22:Carbamidomethylation:1000.00;C24:Carbamidomethylation:1000.00;T30:Phosphorylation (STY):0.00;T31:Phosphorylation (STY):0.07;C36:Carbamidomethylation:1000.00;T40:Phosphorylation (STY):3.05	PEAKS DB
LFPAPS(+79.97)EKSHEETDSTKEEAAK	59.88	2510.12	22	2.6	837.718	44.28	0.9231-0.9512	715.37	749.06	1652.3	3	7082	5378	5359.3	3	1	41115	C1phos_Slot2-13_1_1308.d	16	3	1	2	4	3	3	Q8WXD2|SCG3_HUMAN	Phosphorylation (STY)	S6:Phosphorylation (STY):12.33	PEAKS DB
GGKS(+79.97)GELEQEEERLSK	57.81	1854.84	16	-4.5	619.283	53.07	0.7740-0.8023	1728.9	1442.2	555.33	3	2680.5	1886.5	2104.8	3	4	77221	P1phos_Slot2-10_1_1305.d	9	2	1	1	2	2	1	P10645|CMGA_HUMAN	Phosphorylation (STY)	S4:Phosphorylation (STY):78.25	PEAKS DB
KEALQS(+79.97)EEDEEVKEEDTEQK	76.85	2472.04	20	0.4	825.022	43.38	0.8802-0.9084	3091.7	2101.1	4853.4	3	2081.1	2576.7	3323.8	3	4	58439	P1phos_Slot2-10_1_1305.d	11	3	1	3	1	1	2	O94769|ECM2_HUMAN	Phosphorylation (STY)	S6:Phosphorylation (STY):175.94	PEAKS DB
AEDGATPSPSNET(+79.97)PKK	70.36	1707.74	16	1.8	854.876	24.37	0.9771-1.0052	800.43	498.24	309.24	3	810.67	435.07	396.17	3	2	8152	C2phos_Slot2-14_1_1309.d	15	4	3	2	3	1	2	P29966|MARCS_HUMAN	Phosphorylation (STY)	T13:Phosphorylation (STY):65.81	PEAKS DB
VVQAPKEEEEDEQEAS(+79.97)EEK	68.89	2281.95	19	6.2	761.663	37.99	0.8113-0.8396	3451.4	3005	4581.5	3	2668.2	1232.5	448.77	3	3	45138	C3phos_Slot2-15_1_1310.d	15	3	4	3	2	2	1	Q9UK55|ZPI_HUMAN	Phosphorylation (STY)	S16:Phosphorylation (STY):1000.00	PEAKS DB
GKS(+79.97)PVSKS(+79.97)PVEEK	60.65	1530.67	13	-3.3	766.343	23.39	0.9343-0.9625	386.19	1498.9	1047.1	3	2133	1454	1694.5	3	1	12876	C1phos_Slot2-13_1_1308.d	7	1	1	1	2	1	1	P07197|NFM_HUMAN	Phosphorylation (STY)	S3:Phosphorylation (STY):92.25;S8:Phosphorylation (STY):45.01	PEAKS DB
GGLQPPDS(+79.97)K	56.08	977.422	9	-4.6	489.717	34.57	0.7627-0.7910	3260.8	3028.1	1726.3	3	3084	2294.8	2280.1	3	1	27236	C1phos_Slot2-13_1_1308.d	7	1	1	1	1	1	2	P51693|APLP1_HUMAN	Phosphorylation (STY)	S8:Phosphorylation (STY):1000.00	PEAKS DB
KVPT(+79.97)PEK	49.44	877.431	7	-2.7	439.722	18.28	0.7355-0.7638	470.24	2209.6	2128.7	3	2652.3	2142.4	2754.9	3	2	4085	C2phos_Slot2-14_1_1309.d	7	1	1	1	2	1	1	P12036|NFH_HUMAN	Phosphorylation (STY)	T4:Phosphorylation (STY):1000.00	PEAKS DB
VTEPIS(+79.97)AESGEQVERVNEPSILEM(+15.99)SR	87.59	2981.37	26	1.2	994.801	81.69	0.9737-1.0018	4134.9	1897	24158	3	2965.5	4617.5	3727.7	3	3	117713	C3phos_Slot2-15_1_1310.d	11	2	2	3	1	1	2	O14791|APOL1_HUMAN	Phosphorylation (STY); Oxidation (M)	S6:Phosphorylation (STY):83.88;M24:Oxidation (M):1000.00	PEAKS DB
TES(+79.97)GEETDLISPPQEEVK	85.62	2066.89	18	4.1	1034.46	74.12	1.1173-1.1453	2241.3	11804	7052.3	3	7841.9	9084.9	7308.4	3	2	72422	C2phos_Slot2-14_1_1309.d	13	1	4	1	4	2	1	O43493|TGON2_HUMAN	Phosphorylation (STY)	S3:Phosphorylation (STY):22.85	PEAKS DB
VTEPIS(+79.97)AESGEQVERVNEPSILEMSR	85.4	2965.37	26	2.8	989.471	90.58	0.9895-1.0175	5429.7	4044.1	23611	3	5372.2	5536.3	7066.5	3	3	132949	C3phos_Slot2-15_1_1310.d	9	2	2	1	2	1	1	O14791|APOL1_HUMAN	Phosphorylation (STY)	S6:Phosphorylation (STY):101.94	PEAKS DB
VTEPIS(+79.97)AESGEQVER	81.23	1709.75	15	-2.7	855.883	53.2	0.9928-1.0209	4340.4	2685.2	12127	3	5004.2	5116.4	4963	3	5	75075	P2phos_Slot2-11_1_1306.d	8	1	1	2	1	1	2	O14791|APOL1_HUMAN	Phosphorylation (STY)	S6:Phosphorylation (STY):83.88	PEAKS DB
NPGTSTTPSQPNS(+79.97)AGVQDTEM(+15.99)GPC(+57.02)RR	80.49	2840.19	26	-3.3	947.735	42.33	0.9287-0.9568	3446.9	2064.8	1978.4	3	3567.5	3295.1	3653.4	3	5	57736	P2phos_Slot2-11_1_1306.d	11	4	1	2	1	1	2	P24592|IBP6_HUMAN	Phosphorylation (STY); Oxidation (M); Carbamidomethylation	S13:Phosphorylation (STY):30.10;M21:Oxidation (M):1000.00;C24:Carbamidomethylation:1000.00	PEAKS DB
EALQS(+79.97)EEDEEVK	79.54	1484.59	12	2.4	743.307	45.54	0.9490-0.9771	8814.4	7689.9	5211.2	3	5373.6	7677	8657.8	3	5	62978	P2phos_Slot2-11_1_1306.d	13	3	2	2	2	2	2	O94769|ECM2_HUMAN	Phosphorylation (STY)	S5:Phosphorylation (STY):1000.00	PEAKS DB
C(+57.02)IPDDDEDS(+79.97)YEIFEPPESTVMATRK	73.03	3023.25	25	-3.4	1008.75	95.52	0.9816-1.0097	1001.3	759.92	924.58	3	927.63	636.57	2120.1	3	6	145857	P3phos_Slot2-12_1_1307.d	13	4	1	2	2	2	2	P12259|FA5_HUMAN	Carbamidomethylation; Phosphorylation (STY)	C1:Carbamidomethylation:1000.00;S9:Phosphorylation (STY):8.69	PEAKS DB
VWTSGQVEEYDLDADDINS(+79.97)RVEMKPK	64.84	3103.38	26	-2.4	776.854	86.14	0.9242-0.9523	1430.9	1239	1218.7	3	1178	832.16	1540.5	3	6	130036	P3phos_Slot2-12_1_1307.d	13	2	2	2	2	2	3	P29972|AQP1_HUMAN	Phosphorylation (STY)	S19:Phosphorylation (STY):77.76	PEAKS DB
ANDES(+79.97)NEHS(+79.97)DVIDS(+79.97)QELSK	56.57	2355.82	19	-1.8	786.281	56.33	0.8430-0.8712	1096.5	679.96	0	2	1001.4	1571	122.98	3	6	79073	P3phos_Slot2-12_1_1307.d	5	1	1	0	1	1	1	P10451|OSTP_HUMAN	Phosphorylation (STY)	S5:Phosphorylation (STY):67.11;S9:Phosphorylation (STY):77.76;S14:Phosphorylation (STY):25.18	PEAKS DB
GFVPAGESS(+79.97)S(+79.97)EAGGENYK	85.55	1944.72	18	1.9	973.37	65.94	1.0389-1.0669	725.93	361.54	613.34	3	493.54	946.27	0	2	5	93434	P2phos_Slot2-11_1_1306.d	5	1	1	1	1	1	0	Q14766|LTBP1_HUMAN	Phosphorylation (STY)	S9:Phosphorylation (STY):20.00;S10:Phosphorylation (STY):24.32	PEAKS DB
NPGTSTTPSQPNS(+79.97)AGVQDTEM(+15.99)GPC(+57.02)R	83.19	2684.08	25	-1.5	895.703	46.18	0.8915-0.9197	429.59	415.43	269.25	3	554.12	974.18	755.38	3	1	43512	C1phos_Slot2-13_1_1308.d	12	1	2	1	2	4	2	P24592|IBP6_HUMAN	Phosphorylation (STY); Oxidation (M); Carbamidomethylation	S13:Phosphorylation (STY):61.69;M21:Oxidation (M):1000.00;C24:Carbamidomethylation:1000.00	PEAKS DB
MIGFPSSAGSVS(+79.97)PR	79.41	1471.65	14	2.8	736.838	80.2	0.9726-1.0007	1585.2	2133.3	5833.6	3	4414.1	3157.7	15473	3	3	114495	C3phos_Slot2-15_1_1310.d	6	1	1	1	1	1	1	P13646|K1C13_HUMAN	Phosphorylation (STY)	S12:Phosphorylation (STY):43.88	PEAKS DB
LSPHAFKT(+79.97)ESGEETDLISPPQEEVK	77.86	2847.32	25	0.1	950.116	76.49	0.9681-0.9962	16265	11749	11288	3	12272	11431	10033	3	1	87886	C1phos_Slot2-13_1_1308.d	13	2	3	1	4	1	2	O43493|TGON2_HUMAN	Phosphorylation (STY)	T8:Phosphorylation (STY):5.99	PEAKS DB
DAEYGASPEQVADNGDDHSEGGLVENHVDST(+79.97)MNMLGGGGSAGRKPLK	69.7	4848.1	47	-3.1	970.627	89.76	1.0063-1.0344	0		1398.9	1	493.5	176.08	0	2	6	136765	P3phos_Slot2-12_1_1307.d	5	0	0	1	3	1	0	P18065|IBP2_HUMAN	Phosphorylation (STY)	T31:Phosphorylation (STY):0.00	PEAKS DB
DAEYGAS(+79.97)PEQVADNGDDHSEGGLVENHVDSTMNM(+15.99)LGGGGSAGRKPLK	69.69	4864.1	47	10.8	973.84	81.53	1.0647-1.0927	0	0	0	0	0	0	277.51	1	3	117135	C3phos_Slot2-15_1_1310.d	1	0	0	0	0	0	1	P18065|IBP2_HUMAN	Phosphorylation (STY); Oxidation (M)	S7:Phosphorylation (STY):68.31;M34:Oxidation (M):11.10	PEAKS DB
RPDIQYPDAT(+79.97)DEDIT(+79.97)SHMESEELNGAYK	68.64	3383.36	28	1.7	1128.8	90.32	1.0366-1.0647	0		0	0	10455		4980.1	2	6	137671	P3phos_Slot2-12_1_1307.d	3	0	0	0	2	0	1	P10451|OSTP_HUMAN	Phosphorylation (STY)	T10:Phosphorylation (STY):25.70;T15:Phosphorylation (STY):0.00	PEAKS DB
S(+79.97)LPGESEEMMEEVDQVTLYSYK	63.68	2643.1	22	-4.1	1322.55	115.34	1.2746-1.3025	25476	13938	1311.1	3	721.65	32932	431.55	3	4	202263	P1phos_Slot2-10_1_1305.d	12	3	3	1	2	1	2	P19823|ITIH2_HUMAN	Phosphorylation (STY)	S1:Phosphorylation (STY):10.65	PEAKS DB
AAAAAPAS(+79.97)EDEDDEDDEDDEDDDDDEEDDS(+79.97)EEEAM(+15.99)ETTPAK	56.33	4621.48	41	3.7	1541.51	60.75	1.1374-1.1654	0		0	0	0	0	0	0	3	82283	C3phos_Slot2-15_1_1310.d	0	0	0	0	0	0	0	P19338|NUCL_HUMAN	Phosphorylation (STY); Oxidation (M)	S8:Phosphorylation (STY):22.15;S30:Phosphorylation (STY):20.76;M35:Oxidation (M):1000.00	PEAKS DB
TELPREHANS(+79.97)K	50.68	1360.61	11	-1.9	681.315	24.18	0.9310-0.9591	717.92	1092.5	156.13	3	835.58	861.67	1178.9	3	5	24785	P2phos_Slot2-11_1_1306.d	14	2	2	1	3	3	3	Q14515|SPRL1_HUMAN	Phosphorylation (STY)	S10:Phosphorylation (STY):74.73	PEAKS DB
LPGMEYVDGDFQC(+57.02)HT(+79.97)FDSSNVE	50.65	2626	22	1	1314.01	98.24	1.2568-1.2847	31452	21223	4944.9	3	19845	62.011	23030	3	1	121132	C1phos_Slot2-13_1_1308.d	17	4	3	2	4	1	3	P24593|IBP5_HUMAN	Carbamidomethylation; Phosphorylation (STY)	C13:Carbamidomethylation:1000.00;T15:Phosphorylation (STY):9.42	PEAKS DB
YFIDFVARET(+79.97)TC(+57.02)SKESNEELTESC(+57.02)ETK	70.64	3352.42	27	-0.1	839.113	96.78	0.9861-1.0142	0	0	1991.3	1	242.06	3288.8	2917.2	3	3	144379	C3phos_Slot2-15_1_1310.d	6	0	0	3	1	1	1	P01042|KNG1_HUMAN	Phosphorylation (STY); Carbamidomethylation	T10:Phosphorylation (STY):11.06;C12:Carbamidomethylation:1000.00;C24:Carbamidomethylation:1000.00	PEAKS DB
VDYESQSTDTQNFSS(+79.97)ESK	68.6	2130.83	18	2.9	1066.42	48.68	1.0871-1.1151	7767.6	6235.6	16860	3	5806.5	12072	17217	3	2	38654	C2phos_Slot2-14_1_1309.d	19	1	1	8	1	2	6	P17936|IBP3_HUMAN	Phosphorylation (STY)	S15:Phosphorylation (STY):9.34	PEAKS DB
EFHSHEFHS(+79.97)HEDM(+15.99)LVVDPK	59.15	2415	19	-5.2	604.755	70.85	0.8012-0.8294	0	0	36.645	1	1400.5	640.1	2829.7	3	5	101258	P2phos_Slot2-11_1_1306.d	11	0	0	1	3	3	4	P10451|OSTP_HUMAN	Phosphorylation (STY); Oxidation (M)	S9:Phosphorylation (STY):33.54;M13:Oxidation (M):1000.00	PEAKS DB
DQQRNPGTSTTPSQPNS(+79.97)AGVQDTEMGPC(+57.02)R	105.24	3195.33	29	1	1066.12	52.07	0.9827-1.0108	4073.8	2884.5	1643	3	3100	4190.9	5016.1	3	6	72037	P3phos_Slot2-12_1_1307.d	7	1	1	1	1	1	2	P24592|IBP6_HUMAN	Phosphorylation (STY); Carbamidomethylation	S17:Phosphorylation (STY):88.98;C28:Carbamidomethylation:1000.00	PEAKS DB
AEQC(+57.02)C(+57.02)EETAS(+79.97)SISLHGK	83.42	1985.79	17	1.1	993.904	47.18	1.1508-1.1788	6653.9	4916.3	6718.3	3	2741.4	6572	4503.6	3	5	65401	P2phos_Slot2-11_1_1306.d	18	3	2	4	3	3	3	P02748|CO9_HUMAN	Carbamidomethylation; Phosphorylation (STY)	C4:Carbamidomethylation:1000.00;C5:Carbamidomethylation:1000.00;S10:Phosphorylation (STY):27.96	PEAKS DB
GHPQEESEESNVS(+79.97)MASLGEK	83.23	2223.9	20	-7.1	742.303	54.36	0.8475-0.8757	1961.8	23061	142.23	3	754.66	173.43	935.21	3	1	55843	C1phos_Slot2-13_1_1308.d	13	3	4	1	2	2	1	P05060|SCG1_HUMAN	Phosphorylation (STY)	S13:Phosphorylation (STY):47.09	PEAKS DB
DSPSKSS(+79.97)AEAQTPEDTPNK	81.3	2067.86	19	1.8	1034.94	29.35	1.1050-1.1330	10378	10764	9143.3	3	11404	9977.8	11334	3	5	34473	P2phos_Slot2-11_1_1306.d	20	3	5	2	4	2	4	O43493|TGON2_HUMAN	Phosphorylation (STY)	S7:Phosphorylation (STY):33.98	PEAKS DB
VDYES(+79.97)QSTDTQNFS(+79.97)SESK	74.88	2210.79	18	-3.4	1106.4	51.26	1.1307-1.1587	270.52	1142.7	2279.9	3	144.07	2330.9	3249	3	5	71983	P2phos_Slot2-11_1_1306.d	10	1	2	2	1	2	2	P17936|IBP3_HUMAN	Phosphorylation (STY)	S5:Phosphorylation (STY):14.04;S14:Phosphorylation (STY):17.01	PEAKS DB
APRPQS(+79.97)EESWDEEDKR	70.39	2037.84	16	-3.3	680.287	41.34	0.8283-0.8565	5275.1	3607.6	2119.9	3	3257	2644.3	3530.7	3	1	36453	C1phos_Slot2-13_1_1308.d	9	2	2	1	1	1	2	P05060|SCG1_HUMAN	Phosphorylation (STY)	S6:Phosphorylation (STY):53.53	PEAKS DB
WAEGGGHS(+79.97)R	55.01	1035.39	9	-4.4	518.702	19.47	0.7899-0.8181	9011.6	9339.2	5269.2	3	7041.5	4946.1	7048.9	3	6	16519	P3phos_Slot2-12_1_1307.d	8	1	1	3	1	1	1	P05060|SCG1_HUMAN	Phosphorylation (STY)	S8:Phosphorylation (STY):1000.00	PEAKS DB
FRRPDIQY(+79.97)PDATDEDITS(+79.97)HMES(+79.97)EELNGAYK	54.84	3766.49	30	1.4	1256.51	89.77	1.0792-1.1072	0	4675.6		1	0	14236	0	1	2	94663	C2phos_Slot2-14_1_1309.d	3	0	1	0	0	2	0	P10451|OSTP_HUMAN	Phosphorylation (STY)	Y8:Phosphorylation (STY):16.51;S18:Phosphorylation (STY):0.00;S22:Phosphorylation (STY):10.19	PEAKS DB
IERDS(+79.97)REHEEPT(+79.97)TSEM(+15.99)AEETYSPK	47.52	3026.19	24	-1.8	1009.74	43.9	0.9467-0.9748	3817.9	1685.7	3265.2	3	3529.9	0	4368.6	2	1	40262	C1phos_Slot2-13_1_1308.d	11	2	1	1	3	0	4	P24593|IBP5_HUMAN	Phosphorylation (STY); Oxidation (M)	S5:Phosphorylation (STY):19.61;T12:Phosphorylation (STY):0.00;M16:Oxidation (M):1000.00	PEAKS DB
LPGMEYVDGDFQC(+57.02)HT(+79.97)FDS(+79.97)SNVE	44.68	2705.97	22	-3.7	1353.99	101.08	1.2847-1.3125	726.64	512.01	1041.7	3		933.74	1339.2	2	5	149847	P2phos_Slot2-11_1_1306.d	8	1	1	2	0	1	3	P24593|IBP5_HUMAN	Carbamidomethylation; Phosphorylation (STY)	C13:Carbamidomethylation:1000.00;T15:Phosphorylation (STY):25.70;S18:Phosphorylation (STY):17.01	PEAKS DB
AAVVTS(+79.97)PPPTTAPHK	74.05	1552.77	15	5.8	777.394	42.51	0.9838-1.0119	182.66	492.48	0	2	224.88	0	4194.9	2	2	31036	C2phos_Slot2-14_1_1309.d	6	1	2	0	1	0	2	P35611|ADDA_HUMAN	Phosphorylation (STY)	S6:Phosphorylation (STY):33.98	PEAKS DB
RAPS(+79.97)VANVGSHC(+57.02)DLSLK	70.95	1889.88	17	0.9	630.968	58.76	0.8690-0.8972	2138.9	1010	1103.6	3	1683.9	1664.7	2199	3	4	88195	P1phos_Slot2-10_1_1305.d	13	2	1	3	3	2	2	P21333|FLNA_HUMAN	Phosphorylation (STY); Carbamidomethylation	S4:Phosphorylation (STY):85.52;C12:Carbamidomethylation:1000.00	PEAKS DB
THSS(+79.97)PPRAPSSPGR	53.41	1512.68	14	-3.6	505.235	27.47	0.7275-0.7559	862	496.99	222.93	3	591.94	690.3	548.51	3	5	31517	P2phos_Slot2-11_1_1306.d	13	3	2	1	2	3	2	Q14CZ8|HECAM_HUMAN	Phosphorylation (STY)	S4:Phosphorylation (STY):30.46	PEAKS DB
RKANDES(+79.97)NEHSDVIDSQELSK	51.59	2480.08	21	-0.9	621.028	46.53	0.8023-0.8306	1175.5	622.66	432.04	3	815.06	867.46	3206.5	3	1	44206	C1phos_Slot2-13_1_1308.d	8	1	1	1	2	1	2	P10451|OSTP_HUMAN	Phosphorylation (STY)	S7:Phosphorylation (STY):25.11	PEAKS DB
EVVT(+79.97)SEDGSDC(+57.02)PEAMDLGTLSGIGTLDGFR	119.81	3207.36	30	6.7	1070.14	103.05	1.0534-1.0815	5137.5	3187.4	1227.7	3	6611.9	1379.6	5986.8	3	5	154392	P2phos_Slot2-11_1_1306.d	13	2	2	1	5	1	2	P02671|FIBA_HUMAN	Phosphorylation (STY); Carbamidomethylation	T4:Phosphorylation (STY):14.02;C11:Carbamidomethylation:1000.00	PEAKS DB
MESEGGADDS(+79.97)AEEGDLLDDDDNEDRGDDQLELIKDDEK	77.36	4276.68	38	9.9	1426.58	84.72	1.1307-1.1587	726.93	133.36	0	2	508.41	0	1040.9	2	4	141669	P1phos_Slot2-10_1_1305.d	6	1	1	0	2	0	2	P07910|HNRPC_HUMAN	Phosphorylation (STY)	S10:Phosphorylation (STY):43.57	PEAKS DB
GDGELS(+79.97)WEHSDGDIFR	77.17	1898.75	16	2.6	950.386	88.34	1.0523-1.0804	1865.8	1140.4	1067.2	3	1606.1	1813.1	1717.6	3	3	129248	C3phos_Slot2-15_1_1310.d	17	3	3	1	3	4	3	Q9BU40|CRDL1_HUMAN	Phosphorylation (STY)	S6:Phosphorylation (STY):77.13	PEAKS DB
HTFM(+15.99)GVVSLGSPS(+79.97)GEVSHPR	70.35	2175.98	20	-4.7	726.331	70.91	0.8701-0.8983	1490.9	795.35	351.45	3	517.37	965.19	642.84	3	1	79238	C1phos_Slot2-13_1_1308.d	9	2	2	1	1	2	1	P02765|FETUA_HUMAN	Oxidation (M); Phosphorylation (STY)	M4:Oxidation (M):1000.00;S13:Phosphorylation (STY):45.01	PEAKS DB
S(+79.97)WEDNQQGDEALDTTKDPC(+57.02)QK	65.11	2544.01	21	-4.2	849.009	55.89	0.8802-0.9084	1416.9	900.88	1020.8	3	83.241	1367.3	1554.9	3	1	58036	C1phos_Slot2-13_1_1308.d	12	1	2	3	1	2	3	Q92563|TICN2_HUMAN	Phosphorylation (STY); Carbamidomethylation	S1:Phosphorylation (STY):82.05;C19:Carbamidomethylation:1000.00	PEAKS DB
FRRPDIQYPDATDEDITS(+79.97)HMES(+79.97)EELNGAYK	64.73	3686.53	30	-8.6	922.631	88.99	0.8701-0.8983	403.79	0	6116.6	2	13460	8662.4	2098.4	3	2	93585	C2phos_Slot2-14_1_1309.d	7	1	0	1	1	2	2	P10451|OSTP_HUMAN	Phosphorylation (STY)	S18:Phosphorylation (STY):17.01;S22:Phosphorylation (STY):12.35	PEAKS DB
HLAQAS(+79.97)QELQ	53.19	1203.53	10	-5.2	602.77	41.41	0.8532-0.8814	4017.1	3394	2738.5	3	2022.8	2208.2	2968.1	3	3	50099	C3phos_Slot2-15_1_1310.d	9	2	1	2	1	2	1	Q8NBP7|PCSK9_HUMAN	Phosphorylation (STY)	S6:Phosphorylation (STY):1000.00	PEAKS DB
VVDYSQFQES(+79.97)DDADEDYGR	99.27	2316.87	19	-0.3	1159.44	68.85	1.1989-1.2268	271.31	205.27	532.59	3	1239.2	1798.1	2724.9	3	5	97815	P2phos_Slot2-11_1_1306.d	7	1	1	1	1	1	2	Q9H1E3|NUCKS_HUMAN	Phosphorylation (STY)	S10:Phosphorylation (STY):98.37	PEAKS DB
EAGALDRLLDLPAAAS(+79.97)SEDIERS	90.6	2478.16	23	-4.3	827.06	100.23	0.8960-0.9242	888.99	303.93	1105.5	3	653.43	2753.1	1771.2	3	5	147694	P2phos_Slot2-11_1_1306.d	10	2	1	2	1	2	2	P22466|GALA_HUMAN	Phosphorylation (STY)	S16:Phosphorylation (STY):40.00	PEAKS DB
NPGTSTTPSQPNS(+79.97)AGVQDTEMGPC(+57.02)R	90.54	2668.09	25	-3.9	890.369	54.99	0.9253-0.9535	809.43	1604.7	967.77	3	2254.1	2336.4	2598.5	3	5	77753	P2phos_Slot2-11_1_1306.d	11	1	2	2	2	2	2	P24592|IBP6_HUMAN	Phosphorylation (STY); Carbamidomethylation	S13:Phosphorylation (STY):67.69;C24:Carbamidomethylation:1000.00	PEAKS DB
GEPAAAAAPEAGAS(+79.97)PVEK	81.12	1701.76	18	0.7	851.891	46.97	0.9928-1.0209	2384.4	2055.1	2521.7	3	2980.1	2131	3379.6	3	3	59410	C3phos_Slot2-15_1_1310.d	6	1	1	1	1	1	1	P29966|MARCS_HUMAN	Phosphorylation (STY)	S14:Phosphorylation (STY):1000.00	PEAKS DB
FRRPDIQYPDATDEDITSHMES(+79.97)EELNGAYK	79.61	3606.56	30	-1.2	902.649	91.54	0.9050-0.9332	780.48	815.38	506.15	3	1424.8	362.07	2416.7	3	5	132844	P2phos_Slot2-11_1_1306.d	11	1	3	2	3	1	1	P10451|OSTP_HUMAN	Phosphorylation (STY)	S22:Phosphorylation (STY):79.02	PEAKS DB
VPEARPNS(+79.97)MVVEHPEFLK	77.14	2158.03	18	-5.2	720.348	77.31	0.8938-0.9219	4418	2785.7	3363.4	3	4118.5	4160	5164.6	3	5	110968	P2phos_Slot2-11_1_1306.d	9	1	2	2	2	1	1	P06396|GELS_HUMAN	Phosphorylation (STY)	S8:Phosphorylation (STY):1000.00	PEAKS DB
VSSASDYNS(+79.97)SELK	74.01	1465.6	13	2.1	733.809	41.98	0.9321-0.9602	6912.4	5634.5	4654	3	6589.1	6742.4	7259.9	3	1	37501	C1phos_Slot2-13_1_1308.d	7	2	1	1	1	1	1	P22004|BMP6_HUMAN	Phosphorylation (STY)	S9:Phosphorylation (STY):26.02	PEAKS DB
SPAEAKS(+79.97)PEKEEAK	71.33	1579.71	14	-2.5	527.577	16.9	0.7661-0.7944	663.99	2231.9	2842.1	3	3474	1957.2	4403	3	2	3495	C2phos_Slot2-14_1_1309.d	12	2	2	2	2	2	2	P12036|NFH_HUMAN	Phosphorylation (STY)	S7:Phosphorylation (STY):109.28	PEAKS DB
ESEDKPEIEDVGS(+79.97)DEEEEKKDGDK	60.85	2815.14	24	-3.5	704.793	43.74	0.8226-0.8509	1596.1	718.05	2810.3	3	2260.7	1327.1	5668	3	6	57963	P3phos_Slot2-12_1_1307.d	19	3	2	3	4	2	5	P07900|HS90A_HUMAN	Phosphorylation (STY)	S13:Phosphorylation (STY):81.94	PEAKS DB
AFQYHS(+79.97)K	50.86	959.39	7	-1.4	480.703	26.36	0.7751-0.8034	5901.9	4492	959.93	3	1508.4	3103.3	4381.9	3	5	28657	P2phos_Slot2-11_1_1306.d	7	1	1	1	2	1	1	P00747|PLMN_HUMAN	Phosphorylation (STY)	S6:Phosphorylation (STY):25.66	PEAKS DB
EVPPPPAEES(+79.97)EEEDDDGLPKK	47.41	2386.01	21	1.1	796.345	53.54	0.9219-0.9501	1186	610.57	1893	3	575.02	1119.4	1233.8	3	4	78820	P1phos_Slot2-10_1_1305.d	14	2	1	3	2	4	2	Q9H6X2|ANTR1_HUMAN	Phosphorylation (STY)	S10:Phosphorylation (STY):1000.00	PEAKS DB
VRGEGPGEAGGPLT(+79.97)PRR	37.07	1784.87	17	7.3	893.45	59.43	1.0265-1.0546	4654.7	5323.1	8063.3	3	397.07	6719.8	11875	3	3	79875	C3phos_Slot2-15_1_1310.d	10	1	1	2	3	1	2	P50548|ERF_HUMAN	Phosphorylation (STY)	T14:Phosphorylation (STY):1000.00	PEAKS DB
EEEEGISQES(+79.97)S(+79.97)EEEQ	82.82	1897.6	15	-0.5	949.811	40.6	1.0131-1.0411	190.77		471.2	2	429.9	1025.2	1095.6	3	3	49189	C3phos_Slot2-15_1_1310.d	5	1	0	1	1	1	1	P17096|HMGA1_HUMAN	Phosphorylation (STY)	S10:Phosphorylation (STY):101.94;S11:Phosphorylation (STY):87.62	PEAKS DB
GERGEDS(+79.97)S(+79.97)EEKHLEEPGETQNAFLNER	77.12	3246.31	27	-7.8	812.581	68.06	0.7932-0.8215	4235.4	0	0	1		0	1889.8	1	1	75763	C1phos_Slot2-13_1_1308.d	4	2	0	0	0	0	2	P05060|SCG1_HUMAN	Phosphorylation (STY)	S7:Phosphorylation (STY):40.43;S8:Phosphorylation (STY):41.98	PEAKS DB
GHPQEES(+79.97)EESNVS(+79.97)MASLGEK	77.04	2303.87	20	-4	768.961	57.89	0.8419-0.8701	2453.1	1255.3	1645.6	3		1337.6	1711.3	2	1	60792	C1phos_Slot2-13_1_1308.d	8	2	1	2	0	1	2	P05060|SCG1_HUMAN	Phosphorylation (STY)	S7:Phosphorylation (STY):56.34;S13:Phosphorylation (STY):29.32	PEAKS DB
THLAPYS(+79.97)DELRQR	69.48	1664.77	13	-5.8	555.928	57.88	0.7740-0.8023	1936.7	1003	3633.3	3	1546.7	2378.2	2690	3	5	82042	P2phos_Slot2-11_1_1306.d	10	2	1	2	1	2	2	P02647|APOA1_HUMAN	Phosphorylation (STY)	S7:Phosphorylation (STY):17.01	PEAKS DB
ISHELDSAS(+79.97)S(+79.97)EVN	56.83	1546.56	13	-0.4	774.288	48.23	0.9445-0.9726	468.84	6587.3	456.8	3	852.67	13780	2488.4	3	5	66809	P2phos_Slot2-11_1_1306.d	10	1	1	1	2	3	2	P10451|OSTP_HUMAN	Phosphorylation (STY)	S9:Phosphorylation (STY):32.28;S10:Phosphorylation (STY):29.32	PEAKS DB
AKS(+79.97)PVKEEAKS(+79.97)PEK	52.13	1686.76	14	0.4	563.262	15.5	0.7332-0.7615	59.414	277.47	266.62	3	513.61	497.85	567.51	3	4	9108	P1phos_Slot2-10_1_1305.d	9	1	1	1	2	2	2	P12036|NFH_HUMAN	Phosphorylation (STY)	S3:Phosphorylation (STY):1000.00;S11:Phosphorylation (STY):1000.00	PEAKS DB
ESEDKPEIEDVGS(+79.97)DEEEEK	84.73	2271.88	19	2.6	1136.95	48.87	1.2245-1.2524	1522.5	2357	5152.5	3	6793.8	4991.9	11320	3	4	68856	P1phos_Slot2-10_1_1305.d	19	2	2	2	3	4	6	P07900|HS90A_HUMAN	Phosphorylation (STY)	S13:Phosphorylation (STY):215.31	PEAKS DB
DTQS(+79.97)NELIEINPQSEGK	81.29	1980.87	17	2.6	991.444	75.87	1.0938-1.1218	6293.3	3855.1	3676.6	3	4059.5	5537.2	5291.9	3	2	74806	C2phos_Slot2-14_1_1309.d	10	2	2	2	1	1	2	Q07092|COGA1_HUMAN	Phosphorylation (STY)	S4:Phosphorylation (STY):32.28	PEAKS DB
REDVS(+79.97)AGEDC(+57.02)GPLPEGGPEPR	78.65	2302.95	21	-5	768.654	58.75	0.8136-0.8419	3105.6	2141	1691.4	3	1410.2	2339.2	1493.1	3	2	52218	C2phos_Slot2-14_1_1309.d	13	3	2	2	2	2	2	P01189|COLI_HUMAN	Phosphorylation (STY); Carbamidomethylation	S5:Phosphorylation (STY):1000.00;C10:Carbamidomethylation:1000.00	PEAKS DB
APRPQS(+79.97)EESWDEEDK	76.74	1881.74	15	3	941.883	44.52	1.0411-1.0691	6243.3	4690.2	3016.9	3	4382.3	3459.8	4680.2	3	5	61392	P2phos_Slot2-11_1_1306.d	8	1	1	1	3	1	1	P05060|SCG1_HUMAN	Phosphorylation (STY)	S6:Phosphorylation (STY):68.47	PEAKS DB
RLGPLSAEGTTGLAPAGQT(+79.97)SEESRPR	75.71	2717.31	26	-1.8	680.336	67.69	0.9107-0.9388	7515.3	1143.9	9601.3	3	8162.4	9564.7	2197.6	3	5	96131	P2phos_Slot2-11_1_1306.d	9	1	1	1	2	3	1	P22105|TENX_HUMAN	Phosphorylation (STY)	T19:Phosphorylation (STY):17.01	PEAKS DB
DQQRNPGTSTTPSQPNS(+79.97)AGVQDTEM(+15.99)GPC(+57.02)RR	69.2	3367.43	30	-6.3	842.862	41.28	0.8012-0.8294	1444.9	1149.2	2522	3	1002.3	1989.5	858.71	3	5	56139	P2phos_Slot2-11_1_1306.d	13	2	2	2	3	3	1	P24592|IBP6_HUMAN	Phosphorylation (STY); Oxidation (M); Carbamidomethylation	S17:Phosphorylation (STY):25.70;M25:Oxidation (M):1000.00;C28:Carbamidomethylation:1000.00	PEAKS DB
GAGISGRS(+79.97)QEQSVK	64.6	1482.68	14	4.8	742.352	26.34	0.9591-0.9872	2985.9	2115	3758.3	3	4387.4	4108.2	3114.4	3	4	26524	P1phos_Slot2-10_1_1305.d	6	1	1	1	1	1	1	O15354|GPR37_HUMAN	Phosphorylation (STY)	S8:Phosphorylation (STY):57.45	PEAKS DB
DSGRDYVS(+79.97)QFEGSALGK	58.95	1894.81	17	-8.8	632.605	81.91	0.8012-0.8294	1080.3	576.01	1586	3	877.21	1074.8	395.58	3	4	135416	P1phos_Slot2-10_1_1305.d	11	2	1	2	3	2	1	P02647|APOA1_HUMAN	Phosphorylation (STY)	S8:Phosphorylation (STY):45.01	PEAKS DB
TPSPKEEDEEPES(+79.97)PPEKK	57.66	2131.92	18	-3.6	711.646	31.7	0.8102-0.8385	84.678	0	617.8	2	296.31	132.7	1142.5	3	6	37510	P3phos_Slot2-12_1_1307.d	8	1	0	2	2	1	2	Q9H1E3|NUCKS_HUMAN	Phosphorylation (STY)	S13:Phosphorylation (STY):72.22	PEAKS DB
EGS(+79.97)SEKEEGEQEEGETEAEAEGEEAEAK	97.23	3076.17	28	-1.5	1026.4	51.91	0.9782-1.0063	448.02	1789.3	3155.1	3	4422.1	1200.2	3932.1	3	6	71882	P3phos_Slot2-12_1_1307.d	16	1	1	4	3	2	5	P07197|NFM_HUMAN	Phosphorylation (STY)	S3:Phosphorylation (STY):17.01	PEAKS DB
IYHLPDAES(+79.97)DEDEDFK	95.65	2001.79	16	2.5	1001.91	74.29	1.0893-1.1173	1187.7	806.26	2151.2	3	1578.8	3879.7	5021	3	5	106263	P2phos_Slot2-11_1_1306.d	8	1	1	1	1	1	3	Q15019|SEPT2_HUMAN	Phosphorylation (STY)	S9:Phosphorylation (STY):136.94	PEAKS DB
AIPVAQDLNAPSDWDS(+79.97)RGKDSYET(+79.97)SQLDDQSAETHSHK	95.25	4357.84	38	4.2	1090.48	80.1	0.9535-0.9816	0		612.96	1	0	0	0	0	5	115420	P2phos_Slot2-11_1_1306.d	1	0	0	1	0	0	0	P10451|OSTP_HUMAN	Phosphorylation (STY)	S16:Phosphorylation (STY):4.08;T24:Phosphorylation (STY):0.00	PEAKS DB
VQGEAVSNIQENTQTPTVQEES(+79.97)EEEEVDETGVEVK	95.07	3939.73	35	-3.3	1314.25	78.96	1.1576-1.1855			329.13	1	197.2	860.25	2904.4	3	5	113576	P2phos_Slot2-11_1_1306.d	20	0	0	4	2	7	7	E9PAV3|NACAM_HUMAN	Phosphorylation (STY)	S22:Phosphorylation (STY):23.70	PEAKS DB
SQEES(+79.97)EEGEEDAT(+79.97)SEVDK	90.51	2156.72	18	2.8	1079.37	40.5	1.1262-1.1542	1486.5	1629.4	647.68	3	606.18	1221.3	1431.4	3	2	28120	C2phos_Slot2-14_1_1309.d	7	2	1	1	1	1	1	P05060|SCG1_HUMAN	Phosphorylation (STY)	S5:Phosphorylation (STY):49.79;T13:Phosphorylation (STY):33.98	PEAKS DB
HEVTGWVLVSPLS(+79.97)K	82.9	1630.81	14	3.4	816.418	98.32	1.0299-1.0579	2142.9	1284	1834.9	3	2174.5	1929.6	3459.9	3	5	143018	P2phos_Slot2-11_1_1306.d	10	1	1	1	4	1	2	Q16270|IBP7_HUMAN	Phosphorylation (STY)	S13:Phosphorylation (STY):57.45	PEAKS DB
KEES(+79.97)EES(+79.97)DDDMGFGLFD	82.79	2108.68	17	1.3	1055.35	103.96	1.1005-1.1285	337.92	144.77	295.62	3	0	1118.9	1293.1	2	5	155889	P2phos_Slot2-11_1_1306.d	5	1	1	1	0	1	1	P05386|RLA1_HUMAN:P05387|RLA2_HUMAN	Phosphorylation (STY)	S4:Phosphorylation (STY):1000.00;S7:Phosphorylation (STY):1000.00	PEAKS DB
VTTVASHT(+79.97)SDSDVPSGVTEVVVK	73.76	2393.14	23	-3.2	798.719	73.92	0.9050-0.9332	1086.3	6587	7871.2	3	17220	38165	10699	3	5	106060	P2phos_Slot2-11_1_1306.d	14	2	2	1	2	5	2	P10909|CLUS_HUMAN	Phosphorylation (STY)	T8:Phosphorylation (STY):11.27	PEAKS DB
M(+15.99)ADEAGS(+79.97)EADHEGTHSTK	73.24	1967.72	18	-1.4	656.913	17.04	0.8599-0.8881	1637.9	1122	2392.2	3	1166.1	1846.4	1450.5	3	4	11352	P1phos_Slot2-10_1_1305.d	18	2	4	4	3	2	3	P02671|FIBA_HUMAN	Oxidation (M); Phosphorylation (STY)	M1:Oxidation (M):1000.00;S7:Phosphorylation (STY):67.12	PEAKS DB
ANDESNEHS(+79.97)DVIDSQELSK	65.41	2195.89	19	-5.7	732.966	50.52	0.8170-0.8452	18560	473.21	7451.3	3	28631	15956	36007	3	1	50036	C1phos_Slot2-13_1_1308.d	23	4	3	3	4	3	6	P10451|OSTP_HUMAN	Phosphorylation (STY)	S9:Phosphorylation (STY):16.51	PEAKS DB
RSEQLKEES(+79.97)EGEQFPGC(+57.02)R	63.36	2244.95	18	-4.2	749.322	47.69	0.8181-0.8464	2771.1	2063.9	2252.2	3	1286.6	2269.1	1974.6	3	3	60397	C3phos_Slot2-15_1_1310.d	7	1	1	1	1	1	2	Q9HCB6|SPON1_HUMAN	Phosphorylation (STY); Carbamidomethylation	S9:Phosphorylation (STY):67.13;C17:Carbamidomethylation:1000.00	PEAKS DB
SHEETDST(+79.97)KEEAAK	62.44	1640.66	14	-1.9	821.336	12.87	0.9805-1.0086	4505.1	619.16	190.14	3	534.49	368.25	1144.9	3	5	6649	P2phos_Slot2-11_1_1306.d	13	2	4	2	2	1	2	Q8WXD2|SCG3_HUMAN	Phosphorylation (STY)	T8:Phosphorylation (STY):14.02	PEAKS DB
EFHS(+79.97)HEFHSHEDMLVVDPK	61.26	2399	19	-8.8	600.755	81.22	0.7932-0.8215	2032.8	1128.5	697.05	3	5706.5	2514.2	4483.1	3	5	118426	P2phos_Slot2-11_1_1306.d	13	2	1	1	3	2	4	P10451|OSTP_HUMAN	Phosphorylation (STY)	S4:Phosphorylation (STY):14.62	PEAKS DB
QGHPENRDM(+15.99)PAS(+79.97)EDLQDLQK	60	2403.02	20	-7	802.009	49.99	0.8611-0.8893	2368.2	1542.8	4066.5	3	1643.9	2397.4	3438.6	3	3	64457	C3phos_Slot2-15_1_1310.d	11	3	1	1	3	1	2	P49908|SEPP1_HUMAN	Oxidation (M); Phosphorylation (STY)	M9:Oxidation (M):1000.00;S12:Phosphorylation (STY):1000.00	PEAKS DB
AQRS(+79.97)WEEEEEEEEREEDLM(+15.99)PEK	51.77	2902.15	22	-3.8	968.389	62.62	0.9422-0.9703	4153.4	505.73	1790	3	180.38	3083.9	3564.7	3	1	67435	C1phos_Slot2-13_1_1308.d	15	4	1	1	1	4	4	P20396|TRH_HUMAN	Phosphorylation (STY); Oxidation (M)	S4:Phosphorylation (STY):1000.00;M19:Oxidation (M):1000.00	PEAKS DB
SSAINEEDGSS(+79.97)EEGVVINAGK	82.52	2170.93	21	-0.4	1086.47	66.26	1.1542-1.1821	2984.4	2879.6	7671.2	3	4275.3	4384.6	5399.3	3	3	90868	C3phos_Slot2-15_1_1310.d	16	3	1	5	2	2	3	Q9BUN1|MENT_HUMAN	Phosphorylation (STY)	S11:Phosphorylation (STY):27.96	PEAKS DB
SES(+79.97)PKEPEQLRK	73.78	1506.71	12	-6	503.242	30.67	0.7321-0.7604	701.63	146.44	2513.7	3	1811.5	3622.8	4196.1	3	3	33395	C3phos_Slot2-15_1_1310.d	13	2	1	3	2	2	3	P09651|ROA1_HUMAN	Phosphorylation (STY)	S3:Phosphorylation (STY):22.85	PEAKS DB
QNVDHS(+79.97)QEAAK	60.7	1305.54	11	-4.4	653.774	11.53	0.8678-0.8960	1192.4	1355.6	665.33	3	1814.3	1533.1	2104.6	3	6	4511	P3phos_Slot2-12_1_1307.d	6	1	1	1	1	1	1	O00391|QSOX1_HUMAN	Phosphorylation (STY)	S6:Phosphorylation (STY):1000.00	PEAKS DB
KATEDEGS(+79.97)EQKIPEATNR	52.96	2081.93	18	-3.4	694.982	34.75	0.8012-0.8294	1246.8	1085	1144.9	3	1013.3	1434.8	1452.5	3	5	45002	P2phos_Slot2-11_1_1306.d	11	2	1	2	2	2	2	P01008|ANT3_HUMAN	Phosphorylation (STY)	S8:Phosphorylation (STY):32.94	PEAKS DB
RPAGDS(+79.97)EEEEDDERRGR	52.39	2081.84	17	-1.8	521.468	21.34	0.7423-0.7706	4562.2	1525.7	3642.9	3	4998.4	3464.5	4703.8	3	5	20104	P2phos_Slot2-11_1_1306.d	14	2	1	2	4	3	2	Q14C87|T132D_HUMAN	Phosphorylation (STY)	S6:Phosphorylation (STY):1000.00	PEAKS DB
RDS(+79.97)RDVDEEK	50.29	1327.54	10	-4.2	664.777	11.74	0.8814-0.9096	79.982	1411		2	577.32		8731.2	2	6	4764	P3phos_Slot2-12_1_1307.d	10	2	3	0	3	0	2	P16157|ANK1_HUMAN	Phosphorylation (STY)	S3:Phosphorylation (STY):1000.00	PEAKS DB
KPATPAEDDEDDDIDLFGS(+79.97)DNEEEDK	116.05	2988.16	26	-1.3	997.06	79.15	0.9726-1.0007	579.24	211.01	943.09	3	1092.3	2271.1	2785.3	3	5	113660	P2phos_Slot2-11_1_1306.d	13	2	1	2	2	4	2	P29692|EF1D_HUMAN	Phosphorylation (STY)	S19:Phosphorylation (STY):177.60	PEAKS DB
GFDRLSTEGSDQEKEDDGS(+79.97)ESEEEYSAPLPALAPSSS	99.57	3995.66	37	1.9	1332.9	93	1.0804-1.1083	5719.6	3203.3	4681.1	3	3811.3	5024.3	4933.9	3	5	134678	P2phos_Slot2-11_1_1306.d	9	1	2	3	1	1	1	P19021|AMD_HUMAN	Phosphorylation (STY)	S19:Phosphorylation (STY):0.00	PEAKS DB
VEAKEES(+79.97)EES(+79.97)DEDMGFGLFD	80.79	2421.85	20	1.7	1211.94	103.34	1.1899-1.2178	366.65	170.64	368.54	3	228.94	1166.2	1351.5	3	3	160964	C3phos_Slot2-15_1_1310.d	7	1	1	1	1	1	2	Q8NHW5|RLA0L_HUMAN:P05388|RLA0_HUMAN	Phosphorylation (STY)	S7:Phosphorylation (STY):1000.00;S10:Phosphorylation (STY):1000.00	PEAKS DB
TDC(+57.02)PPHLAVGDWS(+79.97)K	67.38	1661.69	14	3.3	831.857	73.96	1.0220-1.0501	783.64	711.92		2	507.81	1346.4	1225.4	3	1	84137	C1phos_Slot2-13_1_1308.d	11	3	1	0	1	3	3	P82987|ATL3_HUMAN	Carbamidomethylation; Phosphorylation (STY)	C3:Carbamidomethylation:1000.00;S13:Phosphorylation (STY):183.43	PEAKS DB
AGDLLEDS(+79.97)PKRPK	62.12	1504.73	13	-0.9	753.373	41.63	0.9872-1.0153	541.86	204.03	588.35	3	1572.5	1600.4	2042.7	3	5	56571	P2phos_Slot2-11_1_1306.d	10	2	1	1	2	2	2	P51858|HDGF_HUMAN	Phosphorylation (STY)	S8:Phosphorylation (STY):1000.00	PEAKS DB
FRRPDIQY(+79.97)PDATDEDITSHMES(+79.97)EELNGAYK	59.24	3686.53	30	-11.1	922.631	89.45	0.8802-0.9084	5083.4	0	6116.6	2	19243	10855	0	2	5	129829	P2phos_Slot2-11_1_1306.d	7	1	0	1	2	3	0	P10451|OSTP_HUMAN	Phosphorylation (STY)	Y8:Phosphorylation (STY):25.18;S22:Phosphorylation (STY):22.37	PEAKS DB
EEEPEAEEEEVAAKKS(+79.97)PVK	55.17	2206.99	19	1.3	736.671	44.29	0.9208-0.9490	0	472.06	600.76	2	1924.2	294.09	919.96	3	4	60723	P1phos_Slot2-10_1_1305.d	14	0	1	1	5	4	3	P07197|NFM_HUMAN	Phosphorylation (STY)	S16:Phosphorylation (STY):1000.00	PEAKS DB
RPDIQYPDATDEDIT(+79.97)S(+79.97)HMESEELNGAYK	49.34	3383.36	28	1.1	1128.8	87.92	1.0512-1.0792	2848.7	4771		2		3450.6	5352.5	2	6	134086	P3phos_Slot2-12_1_1307.d	5	1	2	0	0	1	1	P10451|OSTP_HUMAN	Phosphorylation (STY)	T15:Phosphorylation (STY):12.35;S16:Phosphorylation (STY):5.55	PEAKS DB
RLHRS(+79.97)VFLTFLRMS(+79.97)THK	25.16	2288.12	17	9.1	763.722	82.56	0.8915-0.9197	4121.2	2784.8		2		3487.9	0	1	5	119970	P2phos_Slot2-11_1_1306.d	5	2	1	0	0	2	0		Phosphorylation (STY)	S5:Phosphorylation (STY):61.69;S14:Phosphorylation (STY):0.00	PEAKS DB
QEVNPVRQEIESETTS(+79.97)EEQIQEEK	91.8	2938.31	24	-1.2	980.445	67.25	0.9580-0.9861	5362	3123.7	1848.2	3	2230	2375.4	2847	3	5	95484	P2phos_Slot2-11_1_1306.d	8	2	2	1	1	1	1	P13611|CSPG2_HUMAN	Phosphorylation (STY)	S16:Phosphorylation (STY):33.98	PEAKS DB
GSTEQDAAS(+79.97)PEK	71.09	1298.5	12	-2.7	650.257	16.03	0.8701-0.8983	2984.8	3875.4	1148	3	2484.8	2605.5	2852.5	3	2	3149	C2phos_Slot2-14_1_1309.d	7	1	1	1	1	1	2	P51693|APLP1_HUMAN	Phosphorylation (STY)	S9:Phosphorylation (STY):94.27	PEAKS DB
VPGPAEGPAEPAAEAS(+79.97)DEAER	65.37	2128.89	21	-3.1	710.639	53.33	0.9377-0.9658	1646.7	1423.5	1304.6	3	1999.7	1690.7	1795.2	3	5	75220	P2phos_Slot2-11_1_1306.d	12	2	2	2	2	2	2	Q24JP5|T132A_HUMAN	Phosphorylation (STY)	S16:Phosphorylation (STY):1000.00	PEAKS DB
RPDIQYPDAT(+79.97)DEDIT(+79.97)SHMES(+79.97)EELNGAYK	62.52	3463.32	28	3.1	1155.45	92.38	1.0276-1.0557			6587.4	1	13756	0	73.324	2	4	156394	P1phos_Slot2-10_1_1305.d	7	0	0	5	1	0	1	P10451|OSTP_HUMAN	Phosphorylation (STY)	T10:Phosphorylation (STY):6.67;T15:Phosphorylation (STY):0.00;S20:Phosphorylation (STY):11.12	PEAKS DB
GRGSEEYRAPRPQS(+79.97)EESWDEEDK	61.14	2816.17	23	-1.8	705.048	52.46	0.8181-0.8464	20300	9491.2	6195.3	3	9512.1	8640.1	14067	3	4	76239	P1phos_Slot2-10_1_1305.d	15	2	2	1	2	3	5	P05060|SCG1_HUMAN	Phosphorylation (STY)	S14:Phosphorylation (STY):28.36	PEAKS DB
S(+42.01)ET(+79.97)APAAPAAAPPAEK	59.35	1599.72	16	0.4	800.869	55.24	0.9838-1.0119	229.82	193.71	2368.4	3	1951.8	4739.6	3425.9	3	3	73163	C3phos_Slot2-15_1_1310.d	13	3	2	2	2	2	2	P16403|H12_HUMAN	Acetylation (Protein N-term); Phosphorylation (STY)	S1:Acetylation (Protein N-term):1000.00;T3:Phosphorylation (STY):1000.00	PEAKS DB
NQGQLYS(+79.97)EGDSRGGDRK	56.83	1945.83	17	-0.2	649.616	28.03	0.8260-0.8543	4057.6	2710.8	1592	3	1982.4	9826.1	3998.9	3	4	29815	P1phos_Slot2-10_1_1305.d	13	3	1	1	2	3	3	O94769|ECM2_HUMAN	Phosphorylation (STY)	S7:Phosphorylation (STY):30.46	PEAKS DB
ANDES(+79.97)NEHSDVIDS(+79.97)QELSKVS(+79.97)R	53.24	2698.02	22	-2.6	900.347	60.72	0.9050-0.9332	335.29	502.04		2	1395.9	875.57	2283.3	3	6	86250	P3phos_Slot2-12_1_1307.d	8	1	2	0	2	1	2	P10451|OSTP_HUMAN	Phosphorylation (STY)	S5:Phosphorylation (STY):12.42;S14:Phosphorylation (STY):25.70;S21:Phosphorylation (STY):38.16	PEAKS DB
AERRDS(+79.97)RDVDEEK	43.76	1683.72	13	-1.5	562.248	15.18	0.7491-0.7774	1408.4	5471.4	405.82	3	861.59	415.03	14504	3	6	10167	P3phos_Slot2-12_1_1307.d	9	1	1	1	2	1	3	P16157|ANK1_HUMAN	Phosphorylation (STY)	S6:Phosphorylation (STY):1000.00	PEAKS DB
ETTC(+57.02)SKESNEELT(+79.97)ESC(+57.02)ETK	37.08	2340.9	19	0.3	1171.46	36.09	1.1464-1.1743	95131		5050.4	2	7353.4	10397	4250.3	3	4	44922	P1phos_Slot2-10_1_1305.d	6	2	0	1	1	1	1	P01042|KNG1_HUMAN	Carbamidomethylation; Phosphorylation (STY)	C4:Carbamidomethylation:1000.00;T13:Phosphorylation (STY):10.19;C16:Carbamidomethylation:1000.00	PEAKS DB
LSTEGSDQEKEDDGS(+79.97)ES(+79.97)EEEYSAPLPALAPSSS	91.65	3600.41	33	3	1201.15	96.95	1.0198-1.0478	591.25	236.85	473.29	3	318.77		624.91	2	6	147876	P3phos_Slot2-12_1_1307.d	6	1	1	1	2	0	1	P19021|AMD_HUMAN	Phosphorylation (STY)	S15:Phosphorylation (STY):4.25;S17:Phosphorylation (STY):4.73	PEAKS DB
ESLKEEDES(+79.97)DDDNM	80.39	1734.58	14	1.4	868.299	38.77	0.9861-1.0142	530.57	2224.8	469.95	3	1035.3	863.62	3528.7	3	2	25627	C2phos_Slot2-14_1_1309.d	15	1	4	1	2	1	6	P25788|PSA3_HUMAN	Phosphorylation (STY)	S9:Phosphorylation (STY):120.29	PEAKS DB
VES(+79.97)LEQEAANERQQLVETHM(+15.99)AR	76.49	2663.2	22	-4	888.739	74.66	0.9118-0.9400	2818.9	1783	3200.7	3	2018.4	1773.2	2006.4	3	1	85220	C1phos_Slot2-13_1_1308.d	6	1	1	1	1	1	1	P05067|A4_HUMAN	Phosphorylation (STY); Oxidation (M)	S3:Phosphorylation (STY):254.93;M20:Oxidation (M):1000.00	PEAKS DB
GEAAAERPGEAAVASS(+79.97)PSK	73.17	1863.84	19	2.5	932.93	34.24	1.0400-1.0680	2644.9	2347.8	2325.5	3	980.64	1874.9	3140.2	3	1	26927	C1phos_Slot2-13_1_1308.d	11	2	2	2	1	2	2	P29966|MARCS_HUMAN	Phosphorylation (STY)	S16:Phosphorylation (STY):27.96	PEAKS DB
DIPTNS(+79.97)PELEETLTHTITK	70.96	2218.04	19	0.2	1110.03	96.76	1.1989-1.2268	2656.2	479.4	11315	3	3654.5	1942.7	3633.4	3	6	147472	P3phos_Slot2-12_1_1307.d	11	2	1	3	2	1	2	P01042|KNG1_HUMAN	Phosphorylation (STY)	S6:Phosphorylation (STY):41.83	PEAKS DB
AQRLS(+79.97)QETEALGR	69.1	1537.72	13	0.2	769.87	51.84	0.9568-0.9850	4319.4	2809.6	1526.1	3	3874	5426.2	3951.4	3	2	43475	C2phos_Slot2-14_1_1309.d	7	2	1	1	1	1	1	Q02818|NUCB1_HUMAN	Phosphorylation (STY)	S5:Phosphorylation (STY):68.31	PEAKS DB
DAEYGASPEQVADNGDDHSEGGLVENHVDST(+79.97)M(+15.99)NMLGGGGSAGRKPLK	64.96	4864.1	47	-2.9	973.827	82.08	1.0041-1.0321	0		180.95	1	0	0	175.7	1	3	118099	C3phos_Slot2-15_1_1310.d	3	0	0	2	0	0	1	P18065|IBP2_HUMAN	Phosphorylation (STY); Oxidation (M)	T31:Phosphorylation (STY):0.00;M32:Oxidation (M):0.00	PEAKS DB
ANDES(+79.97)NEHS(+79.97)DVIDSQELSK	62.66	2275.85	19	-1.5	1138.93	55.47	1.1877-1.2156	2064.7	0	532.63	2	1114.1	1146.2	2241.6	3	6	77558	P3phos_Slot2-12_1_1307.d	5	1	0	1	1	1	1	P10451|OSTP_HUMAN	Phosphorylation (STY)	S5:Phosphorylation (STY):90.01;S9:Phosphorylation (STY):98.37	PEAKS DB
SGSFHSS(+79.97)GEK	60.64	1101.41	10	-2.9	551.713	12.23	0.8125-0.8407	2394.1	2098.6	1460.4	3	2084.1	2644.1	3419.6	3	5	5763	P2phos_Slot2-11_1_1306.d	6	1	1	1	1	1	1	Q96AQ6|PBIP1_HUMAN	Phosphorylation (STY)	S7:Phosphorylation (STY):20.92	PEAKS DB
LVQYRGEVQAM(+15.99)LGQS(+79.97)TEELR	60.09	2402.13	20	-8.4	801.713	76.53	0.8870-0.9152	0		489.36	1	56.792	0	43.061	2	3	108415	C3phos_Slot2-15_1_1310.d	8	0	0	5	1	0	2	P02649|APOE_HUMAN	Oxidation (M); Phosphorylation (STY)	M11:Oxidation (M):1000.00;S15:Phosphorylation (STY):17.01	PEAKS DB
DHHSTHY(+79.97)RAS(+79.97)EEEPEYGEEIK	59.23	2702.03	21	-8.7	676.511	50.61	0.8306-0.8588	8941.5	3777	1500.4	3	0	4083.4	3580.5	2	1	50346	C1phos_Slot2-13_1_1308.d	7	2	1	1	0	2	1	P05060|SCG1_HUMAN	Phosphorylation (STY)	Y7:Phosphorylation (STY):14.04;S10:Phosphorylation (STY):10.92	PEAKS DB
EATNTTSEPSAPSQDLLDLSPS(+79.97)PR	58.8	2592.16	24	-3.8	865.059	91.1	0.9287-0.9568	310.44	376.77	569.58	3	279.53	328.95	394.52	3	5	132018	P2phos_Slot2-11_1_1306.d	13	2	2	4	1	2	2	O75674|TM1L1_HUMAN	Phosphorylation (STY)	S22:Phosphorylation (STY):32.28	PEAKS DB
RPAGDS(+79.97)EEEEDDERR	53.79	1868.72	15	-3.4	623.911	18.16	0.8159-0.8441	2238.9	3193.8	1543.1	3	3379.5	1415.1	2149.5	3	4	13115	P1phos_Slot2-10_1_1305.d	10	2	1	2	3	1	1	Q14C87|T132D_HUMAN	Phosphorylation (STY)	S6:Phosphorylation (STY):1000.00	PEAKS DB
GGLQPPDS(+79.97)KDDTPM(+15.99)TLPK	52.62	1991.89	18	2.4	996.955	59.38	1.1274-1.1553	1988.4	1402.9	1338.5	3	1922.4	2195.3	1659.4	3	4	89092	P1phos_Slot2-10_1_1305.d	12	2	2	2	2	2	2	P51693|APLP1_HUMAN	Phosphorylation (STY); Oxidation (M)	S8:Phosphorylation (STY):25.70;M14:Oxidation (M):1000.00	PEAKS DB
AES(+79.97)ESDLVAEIANVVQK	88.51	1880.88	17	2.3	941.45	103.16	1.1061-1.1341	758.98	624.91	486.84	3	0	979.45	1104	2	5	154489	P2phos_Slot2-11_1_1306.d	9	1	3	2	0	1	2	P19021|AMD_HUMAN	Phosphorylation (STY)	S3:Phosphorylation (STY):55.92	PEAKS DB
AIPVAQDLNAPS(+79.97)DWDSR	83.6	1933.86	17	6.6	967.945	90.6	1.0972-1.1251	129	16576	1961.4	3	0	20457	28154	2	5	131413	P2phos_Slot2-11_1_1306.d	9	1	2	2	0	2	2	P10451|OSTP_HUMAN	Phosphorylation (STY)	S12:Phosphorylation (STY):77.51	PEAKS DB
RRDAEY(+79.97)GASPEQVADNGDDHSEGGLVENHVDSTMNMLGGGGSAGR	79.19	4693.98	45	-1.2	939.802	85	0.9366-0.9647	154.59	0	2207.7	2	2290.6	0	1941.2	2	4	142221	P1phos_Slot2-10_1_1305.d	6	1	0	1	2	0	2	P18065|IBP2_HUMAN	Phosphorylation (STY)	Y6:Phosphorylation (STY):6.63	PEAKS DB
LQGDQGEHSAS(+79.97)QIFQSDWLSK	64.87	2440.07	21	-5.4	814.362	94.7	0.8893-0.9174	6506.5	2721.4	5713.6	3	74.297	7434.3	8317.9	3	6	144900	P3phos_Slot2-12_1_1307.d	11	1	2	2	1	3	2	P20396|TRH_HUMAN	Phosphorylation (STY)	S11:Phosphorylation (STY):15.73	PEAKS DB
LFPAPS(+79.97)EKSHEETDSTK	59.81	1981.87	17	-0.1	661.631	44.25	0.8407-0.8690	12287	8727.7	8221.7	3	11229	8753.1	12469	3	3	55576	C3phos_Slot2-15_1_1310.d	12	3	2	1	2	1	3	Q8WXD2|SCG3_HUMAN	Phosphorylation (STY)	S6:Phosphorylation (STY):19.05	PEAKS DB
GDGELS(+79.97)WEHSDGDIFRQPANR	58.74	2465.04	21	-6.1	822.684	81.61	0.8644-0.8926	3925.9	2299.3	1576.3	3	1852.2	3665.6	3399.1	3	5	117696	P2phos_Slot2-11_1_1306.d	10	1	2	1	2	2	2	Q9BU40|CRDL1_HUMAN	Phosphorylation (STY)	S6:Phosphorylation (STY):42.68	PEAKS DB
SKEEQELHDIHS(+79.97)TR	51.71	1787.78	14	-3.1	596.935	39.82	0.7525-0.7808	357.08	365.84	349.53	3	293.06	306.38	9.3685	3	5	53590	P2phos_Slot2-11_1_1306.d	10	2	2	1	2	2	1	P51674|GPM6A_HUMAN	Phosphorylation (STY)	S12:Phosphorylation (STY):17.01	PEAKS DB
GFDRLSTEGSDQEKEDDGS(+79.97)ES(+79.97)EEEYSAPLPALAPSSS	110.72	4075.63	37	4.5	1359.56	97.77	1.1083-1.1363	1798		1801.3	2	1223.3	2883.9	1866.8	3	1	119358	C1phos_Slot2-13_1_1308.d	7	1	0	1	1	1	3	P19021|AMD_HUMAN	Phosphorylation (STY)	S19:Phosphorylation (STY):13.05;S21:Phosphorylation (STY):14.19	PEAKS DB
EAPAEGEAAEPGSPTAAEGEAASAASST(+79.97)SSPK	93.86	2994.26	32	-2.5	999.095	57.77	1.0074-1.0355	0		0	0	223.68	781.83	1178	3	5	81738	P2phos_Slot2-11_1_1306.d	9	0	0	0	2	3	4	P29966|MARCS_HUMAN	Phosphorylation (STY)	T28:Phosphorylation (STY):0.00	PEAKS DB
DGGS(+79.97)YEQYR	67.5	1153.41	9	-1.7	577.712	37.19	0.8340-0.8622	2739.9	1429	1471.1	3	1314.9	1751.3	2002.1	3	5	49065	P2phos_Slot2-11_1_1306.d	11	2	1	2	2	2	2	Q8IWU5|SULF2_HUMAN	Phosphorylation (STY)	S4:Phosphorylation (STY):33.98	PEAKS DB
RDHHS(+79.97)THY(+79.97)RASEEEPEYGEEIK	66.1	2858.13	22	-7.1	715.537	60.25	0.8452-0.8735	6636.3	7090.5	12841	3			8390.8	1	3	81415	C3phos_Slot2-15_1_1310.d	9	1	1	4	0	0	3	P05060|SCG1_HUMAN	Phosphorylation (STY)	S5:Phosphorylation (STY):17.01;Y8:Phosphorylation (STY):0.00	PEAKS DB
GKS(+79.97)PVPKS(+79.97)PVEEK	59.94	1540.69	13	0.7	771.357	31.12	0.9658-0.9940	257.98	640.61	407.87	3	1056.8	1003.7	1047	3	5	38084	P2phos_Slot2-11_1_1306.d	6	1	1	1	1	1	1	P07197|NFM_HUMAN	Phosphorylation (STY)	S3:Phosphorylation (STY):1000.00;S8:Phosphorylation (STY):1000.00	PEAKS DB
SSS(+79.97)QELGLK	59.44	1027.46	9	-5.3	514.735	45.69	0.7831-0.8113	3109.1	3727.7	1267.4	3	4090.7	2239	3967.4	3	3	57380	C3phos_Slot2-15_1_1310.d	6	1	1	1	1	1	1	Q14515|SPRL1_HUMAN	Phosphorylation (STY)	S3:Phosphorylation (STY):40.00	PEAKS DB
RPDIQYPDATDEDIT(+79.97)SHMES(+79.97)EELNGAYK	53.56	3383.36	28	-1.4	1128.79	87.87	1.0041-1.0321	2848.7	4171.9	1292.4	3	5834.1		228.11	2	1	106038	C1phos_Slot2-13_1_1308.d	6	1	1	1	2	0	1	P10451|OSTP_HUMAN	Phosphorylation (STY)	T15:Phosphorylation (STY):0.00;S20:Phosphorylation (STY):11.12	PEAKS DB
ISHELDS(+79.97)ASS(+79.97)EVN	51.71	1546.56	13	2.7	774.29	49.25	0.9388-0.9670	7624.3	6587.3	8188.4	3		12708	18116	2	1	49396	C1phos_Slot2-13_1_1308.d	5	1	1	1	0	1	1	P10451|OSTP_HUMAN	Phosphorylation (STY)	S7:Phosphorylation (STY):9.40;S10:Phosphorylation (STY):17.01	PEAKS DB
LSGFS(+79.97)FKK	50.88	992.473	8	-1.1	497.245	63.01	0.7649-0.7932	1477.1	1211.6	1174.8	3	1436.5	2010.8	2642.8	3	6	90032	P3phos_Slot2-12_1_1307.d	6	1	1	1	1	1	1	P29966|MARCS_HUMAN	Phosphorylation (STY)	S5:Phosphorylation (STY):30.72	PEAKS DB
GRGS(+79.97)EEYR	49.5	1032.4	8	-0.7	517.208	13.07	0.7989-0.8272	1687.5	580.26	1369.1	3	1970.7	780.75	1149.4	3	4	5742	P1phos_Slot2-10_1_1305.d	8	2	2	1	1	1	1	P05060|SCG1_HUMAN	Phosphorylation (STY)	S4:Phosphorylation (STY):56.34	PEAKS DB
EEVKS(+79.97)PEK	47.75	1024.45	8	-4.2	513.23	12.49	0.7774-0.8057	0	1446.1	1090.4	2	1653.8	0	2623.7	2	6	5500	P3phos_Slot2-12_1_1307.d	5	0	2	1	1	0	1	P12036|NFH_HUMAN	Phosphorylation (STY)	S5:Phosphorylation (STY):1000.00	PEAKS DB
RYS(+79.97)PS(+79.97)PPPK	44.5	1187.48	9	-3.1	594.746	31.11	0.8113-0.8396				0		209.77	323.17	2	6	36374	P3phos_Slot2-12_1_1307.d	4	0	0	0	0	1	3	Q8IYB3|SRRM1_HUMAN	Phosphorylation (STY)	S3:Phosphorylation (STY):20.92;S5:Phosphorylation (STY):30.72	PEAKS DB
FRRPDIQYPDAT(+79.97)DEDIT(+79.97)S(+79.97)HMESEELNGAYK	43.85	3766.49	30	0.3	1256.51	89.55	1.0837-1.1117	0		121.13	1	1250.2		7033.8	2	4	151454	P1phos_Slot2-10_1_1305.d	3	0	0	1	1	0	1	P10451|OSTP_HUMAN	Phosphorylation (STY)	T12:Phosphorylation (STY):11.12;T17:Phosphorylation (STY):2.87;S18:Phosphorylation (STY):3.56	PEAKS DB
E(+42.01)AGAGGLS(+79.97)IAVEGPS(+79.97)KAEIAFEDR	26.03	2575.12	24	-4.3	1288.57	88.17	1.2568-1.2847		1039.8	800.32	2	1174.1	847.66	0	2	5	127858	P2phos_Slot2-11_1_1306.d	6	0	2	1	1	2	0	Q14315|FLNC_HUMAN	Acetylation (Protein N-term); Phosphorylation (STY)	E1:Acetylation (Protein N-term):1000.00;S8:Phosphorylation (STY):1000.00;S15:Phosphorylation (STY):1000.00	PEAKS DB
T(+79.97)ESGEETDLISPPQEEVK	75.95	2066.89	18	2	1034.46	74.07	1.1027-1.1307	11590	5283.3	160.4	3		0	7308.4	1	1	84398	C1phos_Slot2-13_1_1308.d	10	6	2	1	0	0	1	O43493|TGON2_HUMAN	Phosphorylation (STY)	T1:Phosphorylation (STY):0.00	PEAKS DB
VKS(+79.97)PELQAEAK	74.58	1278.62	11	5.8	640.324	33.04	0.8735-0.9017	5423.3	3992.1	5413.9	3	4030.3	5391.4	5772.2	3	3	37270	C3phos_Slot2-15_1_1310.d	6	1	1	1	1	1	1	P02652|APOA2_HUMAN	Phosphorylation (STY)	S3:Phosphorylation (STY):1000.00	PEAKS DB
GWLRDPSAS(+79.97)PGDAGEQAIR	74.18	2061.93	19	-1.7	688.315	71.39	0.7921-0.8204	1641.2	1391.1	408.04	3	1122	1191.9	1254.2	3	2	68749	C2phos_Slot2-14_1_1309.d	9	2	2	1	1	2	1	P18206|VINC_HUMAN	Phosphorylation (STY)	S9:Phosphorylation (STY):48.87	PEAKS DB
ADES(+79.97)QEPQSQVR	71.48	1452.59	12	2	727.305	28.35	0.9118-0.9400	3737.7	3969	2211.4	3	4047.6	3778.2	3524.9	3	5	32734	P2phos_Slot2-11_1_1306.d	7	1	1	2	1	1	1	Q9NR34|MA1C1_HUMAN	Phosphorylation (STY)	S4:Phosphorylation (STY):95.62	PEAKS DB
AVVVHAGEDDLGRGGNQAS(+79.97)VENGNAGRR	58.27	2884.33	28	-4.7	722.089	47.3	0.9028-0.9310	914.19	411.67	244.84	3	599.7	245.43	873.95	3	3	59851	C3phos_Slot2-15_1_1310.d	8	1	1	1	2	1	2	P08294|SODE_HUMAN	Phosphorylation (STY)	S19:Phosphorylation (STY):1000.00	PEAKS DB
NYPS(+79.97)LELDK	49.96	1157.5	9	-4	579.755	71.66	0.8441-0.8723	1120.6	671.63	829.18	3	698.15	687.31	918.45	3	2	68967	C2phos_Slot2-14_1_1309.d	6	1	1	1	1	1	1	P05060|SCG1_HUMAN	Phosphorylation (STY)	S4:Phosphorylation (STY):52.04	PEAKS DB
TKES(+79.97)REAVEK	49.92	1255.58	10	0.6	628.798	11.29	0.8723-0.9005	4966.4	3787.1	2783.7	3	3447.7	5189.9	5320.9	3	4	3704	P1phos_Slot2-10_1_1305.d	9	2	2	1	1	2	1	P14625|ENPL_HUMAN	Phosphorylation (STY)	S4:Phosphorylation (STY):40.63	PEAKS DB
LPGM(+15.99)EYVDGDFQC(+57.02)HT(+79.97)FDSSNVE	40.98	2642	22	0.5	1322.01	87.75	1.2501-1.2780	9570.6	7868.3	12592	3	12817	0	2284.2	2	2	91632	C2phos_Slot2-14_1_1309.d	17	3	4	3	5	0	2	P24593|IBP5_HUMAN	Oxidation (M); Carbamidomethylation; Phosphorylation (STY)	M4:Oxidation (M):1000.00;C13:Carbamidomethylation:1000.00;T15:Phosphorylation (STY):12.33	PEAKS DB
G(+42.01)TWTLELGFVGS(+79.97)APQK	22.07	1811.85	16	-1.9	604.956	43.13	0.7899-0.8181	1080.8	5277.4	2827.4	3	575.45	1405.3	1207.3	3	4	58719	P1phos_Slot2-10_1_1305.d	8	1	2	2	1	1	1		Acetylation (Protein N-term); Phosphorylation (STY)	G1:Acetylation (Protein N-term):1000.00;S12:Phosphorylation (STY):47.07	PEAKS DB
GVEFVC(+57.02)C(+57.02)PLAEESDNVDS(+79.97)ADAEEDDSDVWWGGADTDYADGSEDK	200	4905.85	44	1.5	1636.29	103.15	1.2346-1.2624	0	0	348.31	1	0	0	232.13	1	2	115031	C2phos_Slot2-14_1_1309.d	2	0	0	1	0	0	1	P05067|A4_HUMAN	Carbamidomethylation; Phosphorylation (STY)	C6:Carbamidomethylation:1000.00;C7:Carbamidomethylation:1000.00;S18:Phosphorylation (STY):33.54	PEAKS DB
GFDRLSTEGSDQEKEDDGSESEEEY(+79.97)SAPLPALAPSSS	101.1	3995.66	37	1.9	1332.9	93	1.1106-1.1386	5861.1	3271		2	3811.3	5024.3		2	5	134536	P2phos_Slot2-11_1_1306.d	8	3	3	0	1	1	0	P19021|AMD_HUMAN	Phosphorylation (STY)	Y25:Phosphorylation (STY):0.00	PEAKS DB
EDEAS(+79.97)WSVDVTQHK	77.82	1709.69	14	0.4	855.856	63.94	1.0086-1.0366	1154	305.76	493.24	3	579.98	982.31	920.12	3	1	69084	C1phos_Slot2-13_1_1308.d	9	1	1	2	3	1	1	P20396|TRH_HUMAN	Phosphorylation (STY)	S5:Phosphorylation (STY):32.28	PEAKS DB
ARGGDHVPVS(+79.97)HEQPRGGEDAAVQEPR	59.1	2830.29	26	-7.5	567.062	47.43	0.8520-0.8802	581.24	0	0	1	361.66	425.36	651.71	3	5	65865	P2phos_Slot2-11_1_1306.d	5	1	0	0	1	1	2	Q9HBR0|S38AA_HUMAN	Phosphorylation (STY)	S10:Phosphorylation (STY):1000.00	PEAKS DB
GKDSYET(+79.97)SQLDDQSAETHSHK	54.46	2442	21	-1.5	815.007	36.19	0.9017-0.9298		1620.5	3509.2	2	9001.8	255.09	9386	3	6	45224	P3phos_Slot2-12_1_1307.d	14	0	2	2	4	1	5	P10451|OSTP_HUMAN	Phosphorylation (STY)	T7:Phosphorylation (STY):11.06	PEAKS DB
TLSVAAAFNEDEDS(+79.97)EPEEMPPEAK	46.3	2685.1	24	-3.9	1343.56	92.69	1.2669-1.2947	35.365		314.92	2	159.88	437.13	342.45	3	6	141592	P3phos_Slot2-12_1_1307.d	10	2	0	2	1	2	3	Q8WW12|PCNP_HUMAN	Phosphorylation (STY)	S14:Phosphorylation (STY):30.57	PEAKS DB
AKS(+79.97)PVKEEVKS(+79.97)PEK	43.3	1714.79	14	2	858.406	22.52	1.0131-1.0411		15.6	24.356	2	102.15	91.407	171.1	3	4	19696	P1phos_Slot2-10_1_1305.d	6	0	1	1	1	1	2	P12036|NFH_HUMAN	Phosphorylation (STY)	S3:Phosphorylation (STY):1000.00;S11:Phosphorylation (STY):1000.00	PEAKS DB
LNQAVANKLIS(+79.97)SVDY(+79.97)LR	38.6	2062.99	17	-9.5	1032.49	84.51	1.1240-1.1520	2188.2	2053.4	2345.1	3	0	1632.3	4003.2	2	5	122692	P2phos_Slot2-11_1_1306.d	8	1	2	1	0	2	2	Q6XUX3|DUSTY_HUMAN	Phosphorylation (STY)	S11:Phosphorylation (STY):33.98;Y15:Phosphorylation (STY):56.34	PEAKS DB
AIPVAQDLNAPSDWDSRGKDSYET(+79.97)S(+79.97)QLDDQS(+79.97)AETHSHK	99.56	4437.81	38	-1.5	1110.46	81.12	0.9962-1.0243			0	0	0	0	0	0	5	117161	P2phos_Slot2-11_1_1306.d	0	0	0	0	0	0	0	P10451|OSTP_HUMAN	Phosphorylation (STY)	T24:Phosphorylation (STY):0.00;S25:Phosphorylation (STY):0.00;S31:Phosphorylation (STY):21.87	PEAKS DB
AIPVAQDLNAPSDWDSRGKDSYET(+79.97)SQLDDQSAETHSHK	89.82	4277.88	38	2.1	1070.48	80.32	0.9647-0.9928	0		757.11	1	0	1579.6	4736.3	2	6	119635	P3phos_Slot2-12_1_1307.d	4	0	0	1	0	2	1	P10451|OSTP_HUMAN	Phosphorylation (STY)	T24:Phosphorylation (STY):0.00	PEAKS DB
NVQWDEDS(+79.97)VEYMPANPVR	80.59	2227.92	18	4.4	1114.98	90.68	1.1441-1.1721	1072.1	808.23	729.51	3	684.97	666.88	0	2	3	133615	C3phos_Slot2-15_1_1310.d	5	1	1	1	1	1	0	Q86Y38|XYLT1_HUMAN	Phosphorylation (STY)	S8:Phosphorylation (STY):68.31	PEAKS DB
GKDSY(+79.97)ETSQLDDQSAETHSHK	75.62	2442	21	-2.8	611.506	37.93	0.7978-0.8260	2173.1	105.54	1598.3	3	263.53	7774.5	10584	3	3	45012	C3phos_Slot2-15_1_1310.d	10	1	1	1	2	4	1	P10451|OSTP_HUMAN	Phosphorylation (STY)	Y5:Phosphorylation (STY):10.11	PEAKS DB
EAEEGEDDRDS(+79.97)ANGEDDS	74.88	2018.65	18	-1.4	1010.33	19.53	1.0355-1.0635			663.59	1	281.64	1316	1325	3	5	17922	P2phos_Slot2-11_1_1306.d	4	0	0	1	1	1	1	P07910|HNRPC_HUMAN	Phosphorylation (STY)	S11:Phosphorylation (STY):61.82	PEAKS DB
SRSPGS(+79.97)PVGEGTGSPPK	73	1675.76	17	-6.6	559.589	32.08	0.7491-0.7774	344.61	1230	231.28	3	839.12	289.01	6410.1	3	2	17424	C2phos_Slot2-14_1_1309.d	8	1	2	1	1	1	2	P35611|ADDA_HUMAN	Phosphorylation (STY)	S6:Phosphorylation (STY):73.31	PEAKS DB
S(+79.97)AAGFEPVPEC(+57.02)SDGAIHSWAVEGPQPEPR	70.75	3156.36	29	8.2	1053.14	93.63	1.0344-1.0624	45.679	165.97	384.75	3	974.9	145.43	67.185	3	3	139223	C3phos_Slot2-15_1_1310.d	10	1	2	1	2	2	2	Q02413|DSG1_HUMAN	Phosphorylation (STY); Carbamidomethylation	S1:Phosphorylation (STY):122.88;C11:Carbamidomethylation:1000.00	PEAKS DB
LPGM(+15.99)EYVDGDFQC(+57.02)HTFDSS(+79.97)NVE	60.67	2642	22	0.8	1322.01	92.34	1.2602-1.2880	6307.3	6323.6	14469	3	11522	3378.1	9725.9	3	4	156832	P1phos_Slot2-10_1_1305.d	17	2	2	4	2	3	4	P24593|IBP5_HUMAN	Oxidation (M); Carbamidomethylation; Phosphorylation (STY)	M4:Oxidation (M):1000.00;C13:Carbamidomethylation:1000.00;S19:Phosphorylation (STY):17.01	PEAKS DB
FRRPDIQY(+79.97)PDATDEDIT(+79.97)SHMES(+79.97)EELNGAYK	59	3766.49	30	-2.2	1256.51	91.79	1.0759-1.1039	6928.9		0	1	0		10649	1	1	111024	C1phos_Slot2-13_1_1308.d	3	1	0	0	0	0	2	P10451|OSTP_HUMAN	Phosphorylation (STY)	Y8:Phosphorylation (STY):14.19;T17:Phosphorylation (STY):10.11;S22:Phosphorylation (STY):7.40	PEAKS DB
FRRPDIQY(+79.97)PDAT(+79.97)DEDITS(+79.97)HMESEELNGAYK	54.56	3766.49	30	-1.3	1256.51	91.94	1.1083-1.1363	115.69	0		1	7857.9	17080		2	5	132937	P2phos_Slot2-11_1_1306.d	6	1	0	0	3	2	0	P10451|OSTP_HUMAN	Phosphorylation (STY)	Y8:Phosphorylation (STY):14.29;T12:Phosphorylation (STY):10.19;S18:Phosphorylation (STY):0.00	PEAKS DB
EVPPPPAEES(+79.97)EEEDDDGLPK	49.79	2257.91	20	-1.7	1129.97	64.07	1.1877-1.2156	1923.7	715.96	1270.8	3	190.52	925.81	1501.2	3	1	69445	C1phos_Slot2-13_1_1308.d	12	2	1	2	1	2	4	Q9H6X2|ANTR1_HUMAN	Phosphorylation (STY)	S10:Phosphorylation (STY):1000.00	PEAKS DB
KVEEDLKADEPS(+79.97)S(+79.97)EES(+79.97)DLEIDK	43.68	2744.06	22	-3.5	1373.04	72.16	1.2724-1.3002	0		0	0		199.43	2025.7	2	6	105636	P3phos_Slot2-12_1_1307.d	4	0	0	0	0	1	3	P50502|F10A1_HUMAN	Phosphorylation (STY)	S12:Phosphorylation (STY):1000.00;S13:Phosphorylation (STY):1000.00;S16:Phosphorylation (STY):1000.00	PEAKS DB
AIPVAQDLNAPSDWDS(+79.97)RGKDS(+79.97)YETSQLDDQSAETHSHK	102.78	4357.84	38	-0.3	1090.47	80.08	0.9523-0.9805	534.39	0	0	1	420.72	0	1959.8	2	5	115395	P2phos_Slot2-11_1_1306.d	4	1	0	0	2	0	1	P10451|OSTP_HUMAN	Phosphorylation (STY)	S16:Phosphorylation (STY):6.65;S21:Phosphorylation (STY):12.28	PEAKS DB
[truncated: 8,819 more rows]
