# Supplementary material for: Phosphoproteome analysis of cerebrospinal fluid extracellular vesicles in primary central nervous system lymphoma
Source: Royal Society of Chemistry journal article supplement (doi:10.1039/d3an00670k), 2023-01-01
Supplement: d3an00670k2.zip [file S5-Label-free quantitation results.xlsx]

## Sheet: phospeptide-KW final
Accession	Peptide	X.10lgP	m.z	X1.k0.Range	Area.Sample.1	Area.Sample.2	Area.Sample.3	Area.Sample.4	Area.Sample.5	Area.Sample.6	Source.File	PTM	Ascore	Phosphorylation	NO.of.Phosphorylation	N_Area.Sample.1_C1	N_Area.Sample.2_C2	N_Area.Sample.3_C3	N_Area.Sample.4_P1	N_Area.Sample.5_P2	N_Area.Sample.6_P3	log2.P.C.	in.samples	KW.test.p.value
Q9H1E3|NUCKS_HUMAN	EKT(+79.97)PS(+79.97)PKEEDEEPESPPEK	49	781.307	0.8351-0.8633	NA	NA	NA	59900	349	816	P1phos_Slot2-10_1_1305.d	Phosphorylation (STY)	T3:Phosphorylation (STY):40.04;S5:Phosphorylation (STY):35.88	Phosphorylation	2	5	5	5	22354.4	337.957	582	10.5996	3	0.036904
P10451|OSTP_HUMAN	HLKFRIS(+79.97)HELDS(+79.97)AS(+79.97)SEVN	36.47	770.316	0.8498-0.8780	0	NA	NA	2690	4270	2310	P2phos_Slot2-11_1_1306.d	Phosphorylation (STY)	S7:Phosphorylation (STY):29.57;S12:Phosphorylation (STY):28.36;S14:Phosphorylation (STY):17.01	Phosphorylation	3	5	5	5	1001.9	4137.06	1640	8.821	3	0.036904
	F(+42.01)TFPEAGLRIMIT(+79.97)NK	25.75	930.458	1.1531-1.1810	0	0	NA	11100	265	2400	P3phos_Slot2-12_1_1307.d	Acetylation (Protein N-term); Phosphorylation (STY)	F1:Acetylation (Protein N-term):1000.00;T13:Phosphorylation (STY):56.41	Phosphorylation	1	5	5	5	4148.22	257.109	1710	8.67209	3	0.036904
P10451|OSTP_HUMAN	QNLLAPQNAVS(+79.97)SEET(+79.97)NDFKQETLPSK	66.21	1016.79	1.0029-1.0310	0	0	0	76.4	4030	41	P2phos_Slot2-11_1_1306.d	Phosphorylation (STY)	S11:Phosphorylation (STY):0.00;T15:Phosphorylation (STY):5.77	Phosphorylation	2	5	5	5	28.4829	3909.48	29.3	8.04702	3	0.036904
P16401|H15_HUMAN	S(+42.01)ET(+79.97)APAETATPAPVEK	66.02	860.892	1.0254-1.0534	NA	NA	0	820	1600	1010	P2phos_Slot2-11_1_1306.d	Acetylation (Protein N-term); Phosphorylation (STY)	S1:Acetylation (Protein N-term):1000.00;T3:Phosphorylation (STY):87.95	Phosphorylation	1	5	5	5	305.718	1548.9	723	7.42502	3	0.036904
Q14498|RBM39_HUMAN	DKS(+79.97)PVREPIDNLTPEER	59.39	692.329	0.8249-0.8532	NA	NA	0	227	1040	843	P2phos_Slot2-11_1_1306.d	Phosphorylation (STY)	S3:Phosphorylation (STY):72.22	Phosphorylation	1	5	5	5	84.7171	1008.13	601	6.81954	3	0.036904
P29966|MARCS_HUMAN	EAPAEGEAAEPGSPTAAEGEAASAASST(+79.97)SSPK	93.86	999.095	1.0074-1.0355	0	NA	0	224	782	1180	P2phos_Slot2-11_1_1306.d	Phosphorylation (STY)	T28:Phosphorylation (STY):0.00	Phosphorylation	1	5	5	5	83.4193	758.092	840	6.80896	3	0.036904
P10451|OSTP_HUMAN	EFHSHEFHS(+79.97)HEDM(+15.99)LVVDPK	59.15	604.755	0.8012-0.8294	0	0	36.6	1400	640	2830	P2phos_Slot2-11_1_1306.d	Phosphorylation (STY); Oxidation (M)	S9:Phosphorylation (STY):33.54;M13:Oxidation (M):1000.00	Phosphorylation	1	5	5	29.2837	522.303	620.665	2020	6.33059	4	0.0463016
P08670|VIME_HUMAN	ETNLDS(+79.97)LPLVDTHSK	63.13	874.912	1.0680-1.0960	NA	NA	NA	414	618	595	P1phos_Slot2-10_1_1305.d	Phosphorylation (STY)	S6:Phosphorylation (STY):48.12	Phosphorylation	1	5	5	5	154.323	599.197	425	6.29557	3	0.036904
P18065|IBP2_HUMAN	DAEYGAS(+79.97)PEQVADNGDDHSEGGLVENHVDSTM(+15.99)NMLGGGGSAGRKPLK	67.02	973.83	1.0624-1.0904	0	0	0	1820	135	278	P1phos_Slot2-10_1_1305.d	Phosphorylation (STY); Oxidation (M)	S7:Phosphorylation (STY):47.09;M32:Oxidation (M):14.04	Phosphorylation	1	5	5	5	680.28	130.513	198	6.07148	3	0.036904
P01210|PENK_HUMAN	RFAEALPSDEEGES(+79.97)YSK	46.14	997.933	1.1341-1.1620	0	NA	NA	451	510	264	C1phos_Slot2-13_1_1308.d	Phosphorylation (STY)	S14:Phosphorylation (STY):0.00	Phosphorylation	1	5	5	5	168.315	494.447	188	5.82578	3	0.036904
P22105|TENX_HUMAN	LGPLSAEGTTGLAPAGQT(+79.97)SEESRPR	74.75	854.746	0.9208-0.9490	NA	NA	NA	361	483	303	P2phos_Slot2-11_1_1306.d	Phosphorylation (STY)	T18:Phosphorylation (STY):0.00	Phosphorylation	1	5	5	5	134.49	467.889	216	5.76987	3	0.036904
P13861|KAP2_HUMAN	RVS(+79.97)VC(+57.02)AETYNPDEEEEDTDPR	63.99	864.348	0.9017-0.9298	NA	NA	NA	401	360	398	P1phos_Slot2-10_1_1305.d	Phosphorylation (STY); Carbamidomethylation	S3:Phosphorylation (STY):8.19;C5:Carbamidomethylation:1000.00	Phosphorylation	1	5	5	5	149.586	349.457	284	5.70543	3	0.036904
Q9UM21|MGT4A_HUMAN	SEGLEIS(+79.97)K	35.75	471.712	0.7559-0.7842	0	0	0	374	302	485	C3phos_Slot2-15_1_1310.d	Phosphorylation (STY)	S7:Phosphorylation (STY):22.09	Phosphorylation	1	5	5	5	139.431	292.443	346	5.69707	3	0.036904
E9PAV3|NACAM_HUMAN	VQGEAVSNIQENTQTPT(+79.97)VQEESEEEEVDETGVEVK	102.12	1314.25	1.1464-1.1743	0	0	48.5	122	307	2550	C3phos_Slot2-15_1_1310.d	Phosphorylation (STY)	T17:Phosphorylation (STY):7.38	Phosphorylation	1	5	5	38.7452	45.5397	298.154	1820	5.47207	4	0.0463016
P12036|NFH_HUMAN	SPEKEEAKS(+79.97)PEK	38.22	719.826	0.9129-0.9411	NA	0	0	259	131	349	P1phos_Slot2-10_1_1305.d	Phosphorylation (STY)	S9:Phosphorylation (STY):78.75	Phosphorylation	1	5	5	5	96.6475	126.799	249	4.97789	3	0.036904
P29590|PML_HUMAN	SS(+79.97)PEQPRPSTSK	50.67	690.811	0.8904-0.9186	NA	NA	NA	183	187	305	P2phos_Slot2-11_1_1306.d	Phosphorylation (STY)	S2:Phosphorylation (STY):0.00	Phosphorylation	1	5	5	5	68.2108	181.574	218	4.96231	3	0.036904
P80723|BASP1_HUMAN	AEGAATEEEGT(+79.97)PK	73.88	685.28	0.9186-0.9467	0	0	NA	235	195	248	P2phos_Slot2-11_1_1306.d	Phosphorylation (STY)	T11:Phosphorylation (STY):71.86	Phosphorylation	1	5	5	5	87.8163	189.487	177	4.92045	3	0.036904
P10451|OSTP_HUMAN	EFHS(+79.97)HEFHS(+79.97)HEDM(+15.99)LVVDPK	42.45	624.743	0.8023-0.8306	19.7	0	0	547	360	471	P2phos_Slot2-11_1_1306.d	Phosphorylation (STY); Oxidation (M)	S4:Phosphorylation (STY):1000.00;S9:Phosphorylation (STY):1000.00;M13:Oxidation (M):1000.00	Phosphorylation	2	19.7	5	5	204.129	348.759	336	4.90472	4	0.0463016
P51991|ROA3_HUMAN	SSGS(+79.97)PYGGGYGSGGGSGGYGSR	62.2	995.885	1.0490-1.0770	NA	NA	NA	109	317	130	P3phos_Slot2-12_1_1307.d	Phosphorylation (STY)	S4:Phosphorylation (STY):0.00	Phosphorylation	1	5	5	5	40.7102	307.782	92.7	4.87829	3	0.036904
P10451|OSTP_HUMAN	KANDES(+79.97)NEHSDVIDSQELSKVS(+79.97)R	29.71	687.548	0.8656-0.8938	NA	NA	NA	176	109	341	P3phos_Slot2-12_1_1307.d	Phosphorylation (STY)	S6:Phosphorylation (STY):3.56;S22:Phosphorylation (STY):7.77	Phosphorylation	2	5	5	5	65.5927	105.904	243	4.78993	3	0.036904
O94804|STK10_HUMAN	QVAEQGGDLS(+79.97)PAANR	76.95	796.861	0.9411-0.9692	NA	10.5	0	113	349	268	C3phos_Slot2-15_1_1310.d	Phosphorylation (STY)	S10:Phosphorylation (STY):1000.00	Phosphorylation	1	5	11.16	5	41.9968	338.714	192	4.75717	4	0.0463016
P18858|DNLI1_HUMAN	EGEDGDQPTT(+79.97)PPKPLK	58.22	894.909	1.0333-1.0613	NA	NA	NA	524	56.4	191	P3phos_Slot2-12_1_1307.d	Phosphorylation (STY)	T10:Phosphorylation (STY):0.00	Phosphorylation	1	5	5	5	195.54	54.6992	136	4.68826	3	0.036904
Q15818|NPTX1_HUMAN	LTPGEVYNLATC(+57.02)ST(+79.97)K	66.84	867.397	1.0344-1.0624	NA	NA	NA	182	163	222	P2phos_Slot2-11_1_1306.d	Carbamidomethylation; Phosphorylation (STY)	C12:Carbamidomethylation:1000.00;T14:Phosphorylation (STY):0.00	Phosphorylation	1	5	5	5	67.9796	158.468	158	4.68074	3	0.036904
Q13428|TCOF_HUMAN	KLS(+79.97)GDQPAAR	54.02	561.769	0.8351-0.8633	NA	NA	NA	92.2	139	226	P2phos_Slot2-11_1_1306.d	Phosphorylation (STY)	S3:Phosphorylation (STY):1000.00	Phosphorylation	1	5	5	5	34.3952	134.838	161	4.45993	3	0.036904
P06748|NPM_HUMAN	C(+57.02)GSGPVHISGQHLVAVEEDAES(+79.97)EDEEEEDVK	54.52	865.864	0.8904-0.9186	NA	NA	148	874	1460	1450	P2phos_Slot2-11_1_1306.d	Carbamidomethylation; Phosphorylation (STY)	C1:Carbamidomethylation:1000.00;S22:Phosphorylation (STY):71.95	Phosphorylation	1	5	5	118.613	325.838	1412.08	1030	4.42987	4	0.0463016
P03951|FA11_HUMAN	IPLVT(+79.97)NEEC(+57.02)QKR	22.65	783.883	1.0097-1.0377	NA	NA	NA	169	162	107	P3phos_Slot2-12_1_1307.d	Phosphorylation (STY); Carbamidomethylation	T5:Phosphorylation (STY):1000.00;C9:Carbamidomethylation:1000.00	Phosphorylation	1	5	5	5	63.1015	156.849	76.2	4.30317	3	0.036904
P17936|IBP3_HUMAN	YKVDYES(+79.97)QSTDTQNFS(+79.97)SESK	38.33	1251.98	1.2111-1.2390	NA	NA	199	666	1740	1910	P2phos_Slot2-11_1_1306.d	Phosphorylation (STY)	S7:Phosphorylation (STY):14.04;S16:Phosphorylation (STY):15.08	Phosphorylation	2	5	5	158.881	248.27	1682.51	1360	4.2841	4	0.0463016
P01008|ANT3_HUMAN	KAT(+79.97)EDEGSEQKIPEATNR	41.7	694.982	0.8012-0.8294	96.7	0	NA	809	1430	157	P2phos_Slot2-11_1_1306.d	Phosphorylation (STY)	T3:Phosphorylation (STY):0.00	Phosphorylation	1	96.7	5	5	301.574	1391.24	112	4.07948	4	0.0463016
Q6KC79|NIPBL_HUMAN	AITSLLGGGS(+79.97)PK	43.85	590.802	0.8667-0.8949	NA	NA	NA	23.5	160	125	P3phos_Slot2-12_1_1307.d	Phosphorylation (STY)	S10:Phosphorylation (STY):47.92	Phosphorylation	1	5	5	5	8.77342	155.317	89.5	4.0793	3	0.036904
Q9BQ16|TICN3_HUMAN	S(+79.97)DGGNFLDDK	73.24	574.218	0.7944-0.8226	0	0	0	70.5	122	147	C3phos_Slot2-15_1_1310.d	Phosphorylation (STY)	S1:Phosphorylation (STY):1000.00	Phosphorylation	1	5	5	5	26.2964	118.238	105	4.05345	3	0.036904
P12036|NFH_HUMAN	SPVKEEAKT(+79.97)PEK	49.88	711.848	0.9242-0.9523	NA	0	0	152	83.9	154	P1phos_Slot2-10_1_1305.d	Phosphorylation (STY)	T9:Phosphorylation (STY):49.31	Phosphorylation	1	5	5	5	56.6012	81.3846	110	4.04637	3	0.036904
P12109|CO6A1_HUMAN	DVFDFIPGS(+79.97)DQLNVISC(+57.02)QGLAPSQGRPGLSLVK	38.29	1198.93	1.1083-1.1363	NA	NA	0	64.3	114	152	C3phos_Slot2-15_1_1310.d	Phosphorylation (STY); Carbamidomethylation	S9:Phosphorylation (STY):8.82;C17:Carbamidomethylation:1000.00	Phosphorylation	1	5	5	5	23.9663	110.374	108	4.01488	3	0.036904
Q9HBR0|S38AA_HUMAN	ARGGDHVPVS(+79.97)HEQPR	57.52	431.205	0.7287-0.7570	0	0	0	130	108	112	P2phos_Slot2-11_1_1306.d	Phosphorylation (STY)	S10:Phosphorylation (STY):1000.00	Phosphorylation	1	5	5	5	48.6463	104.808	80.1	3.96089	3	0.036904
P35606|COPB2_HUMAN	STAQQELDGKPAS(+79.97)PTPVIVASHTANK	65.52	909.785	0.9523-0.9805	NA	NA	NA	43.8	118	136	P3phos_Slot2-12_1_1307.d	Phosphorylation (STY)	S13:Phosphorylation (STY):14.04	Phosphorylation	1	5	5	5	16.318	114.65	96.9	3.92542	3	0.036904
Q15149|PLEC_HUMAN	SSS(+79.97)VGSSSSYPISPAVSR	72.66	917.918	1.0546-1.0826	47.8	NA	NA	302	467	385	P2phos_Slot2-11_1_1306.d	Phosphorylation (STY)	S3:Phosphorylation (STY):0.00	Phosphorylation	1	47.8	5	5	112.568	453.286	275	3.86141	4	0.0463016
P08603|CFAH_HUMAN	NTEILTGSWS(+79.97)DQTYPEGTQAIYK	58.72	1341.6	1.2902-1.3180	NA	NA	NA	74.9	129	56.9	P2phos_Slot2-11_1_1306.d	Phosphorylation (STY)	S10:Phosphorylation (STY):5.47	Phosphorylation	1	5	5	5	27.9321	125.054	40.6	3.68976	3	0.036904
Q8TAQ2|SMRC2_HUMAN	KRS(+79.97)PS(+79.97)PSPTPEAK	38.98	771.341	0.9512-0.9793	NA	NA	NA	43.5	106	104	P2phos_Slot2-11_1_1306.d	Phosphorylation (STY)	S3:Phosphorylation (STY):33.81;S5:Phosphorylation (STY):11.10	Phosphorylation	2	5	5	5	16.2158	102.529	74.5	3.68749	3	0.036904
Q9Y2W1|TR150_HUMAN	ASAVSELS(+79.97)PRERS(+79.97)PALK	34.88	653.306	0.8102-0.8385	NA	NA	NA	13.6	31.8	220	P1phos_Slot2-10_1_1305.d	Phosphorylation (STY)	S8:Phosphorylation (STY):24.24;S13:Phosphorylation (STY):11.72	Phosphorylation	2	5	5	5	5.08914	30.7889	157	3.68215	3	0.036904
Q13428|TCOF_HUMAN	TSQVGAASAPAKES(+79.97)PRK	58.05	882.937	1.1397-1.1676	NA	NA	NA	56	34.4	192	P3phos_Slot2-12_1_1307.d	Phosphorylation (STY)	S14:Phosphorylation (STY):36.87	Phosphorylation	1	5	5	5	20.882	33.3584	137	3.66996	3	0.036904
Q8IYB3|SRRM1_HUMAN	RYS(+79.97)PPIQR	51.1	548.767	0.8599-0.8881	NA	NA	73.8	298	421	500	P2phos_Slot2-11_1_1306.d	Phosphorylation (STY)	S3:Phosphorylation (STY):33.98	Phosphorylation	1	5	5	59.0045	111.088	408.683	357	3.66723	4	0.0463016
P13746|1A11_HUMAN:P04439|1A03_HUMAN:P16188|1A30_HUMAN	GGSYTQAASSDSAQGS(+79.97)DVSLTAC(+57.02)KV	55.09	1264.03	1.2535-1.2813	NA	NA	NA	74.2	31.5	164	P3phos_Slot2-12_1_1307.d	Phosphorylation (STY); Carbamidomethylation	S16:Phosphorylation (STY):22.45;C23:Carbamidomethylation:1000.00	Phosphorylation	1	5	5	5	27.6558	30.5785	117	3.54579	3	0.036904
Q9H2U2|IPYR2_HUMAN	SLVESVSSS(+79.97)PNK	58.27	657.303	0.8926-0.9208	NA	NA	17.3	99.2	140	141	P2phos_Slot2-11_1_1306.d	Phosphorylation (STY)	S9:Phosphorylation (STY):10.11	Phosphorylation	1	5	5	13.804	37.0072	135.856	100	3.52042	4	0.0463016
Q7Z422|SZRD1_HUMAN	S(+79.97)KSPPKVPIVIQDDSLPAGPPPQIR	64.81	906.147	0.9433-0.9715	NA	0	0	139	23.2	127	P3phos_Slot2-12_1_1307.d	Phosphorylation (STY)	S1:Phosphorylation (STY):0.00	Phosphorylation	1	5	5	5	51.7194	22.5053	90.9	3.46026	3	0.036904
Q16181|SEPT7_HUMAN	ILEQQNSSRT(+79.97)LEK	41.76	813.4	1.0209-1.0490	NA	NA	NA	43.6	70.5	107	P3phos_Slot2-12_1_1307.d	Phosphorylation (STY)	T10:Phosphorylation (STY):28.36	Phosphorylation	1	5	5	5	16.2766	68.3284	76.2	3.42205	3	0.036904
P13639|EF2_HUMAN	AGETRFT(+79.97)DTR	35.24	617.266	0.8904-0.9186	30.5	NA	NA	154	159	275	P1phos_Slot2-10_1_1305.d	Phosphorylation (STY)	T7:Phosphorylation (STY):9.42	Phosphorylation	1	30.5	5	5	57.4738	153.92	196	3.33262	4	0.0463016
Q05519|SRS11_HUMAN	DYDEEEQGYDS(+79.97)EK	83.54	843.789	0.9850-1.0131	NA	NA	NA	44.6	81.1	77	P2phos_Slot2-11_1_1306.d	Phosphorylation (STY)	S11:Phosphorylation (STY):55.92	Phosphorylation	1	5	5	5	16.6462	78.6618	55	3.32454	3	0.036904
Q9H173|SIL1_HUMAN	FKEGAEM(+15.99)ES(+79.97)SKEDK	34.28	855.851	1.0108-1.0389	0	NA	0	84.4	67.2	65.3	P1phos_Slot2-10_1_1305.d	Oxidation (M); Phosphorylation (STY)	M7:Oxidation (M):1000.00;S9:Phosphorylation (STY):0.00	Phosphorylation	1	5	5	5	31.4743	65.1558	46.6	3.25482	3	0.036904
P17612|KAPCA_HUMAN:P22694|KAPCB_HUMAN:P22612|KAPCG_HUMAN	GRTWT(+79.97)LC(+57.02)GTPEYLAPEIILSK	73.5	829.075	0.9242-0.9523	0	0	46.3	121	278	154	P2phos_Slot2-11_1_1306.d	Phosphorylation (STY); Carbamidomethylation	T5:Phosphorylation (STY):7.32;C7:Carbamidomethylation:1000.00	Phosphorylation	1	5	5	36.9936	45.0698	269.181	110	3.17408	4	0.0463016
Q9NQC3|RTN4_HUMAN	M(+42.01)EDLDQSPLVSSSDS(+79.97)PPRPQPAFK	43.58	917.415	0.9658-0.9940	NA	NA	NA	40.6	48.8	102	P2phos_Slot2-11_1_1306.d	Acetylation (Protein N-term); Phosphorylation (STY)	M1:Acetylation (Protein N-term):1000.00;S15:Phosphorylation (STY):3.13	Phosphorylation	1	5	5	5	15.1414	47.3561	72.6	3.17082	3	0.036904
Q09666|AHNK_HUMAN	LKS(+79.97)EDGVEGDLGETQSR	65.39	950.421	1.0602-1.0882	37.3	NA	29.7	210	279	329	P3phos_Slot2-12_1_1307.d	Phosphorylation (STY)	S3:Phosphorylation (STY):105.15	Phosphorylation	1	37.3	5	23.713	78.4592	270.81	235	3.14476	5	0.0495346
Q9Y2W1|TR150_HUMAN	ASAVSELS(+79.97)PR	32.56	548.756	0.8294-0.8577	0	NA	80	190	279	429	P2phos_Slot2-11_1_1306.d	Phosphorylation (STY)	S8:Phosphorylation (STY):20.70	Phosphorylation	1	5	5	63.8895	70.881	270.762	306	3.13122	4	0.0463016
Q9UQ35|SRRM2_HUMAN	RVPS(+79.97)PTPAPK	39.39	565.291	0.8136-0.8419	NA	NA	96.9	228	322	456	P2phos_Slot2-11_1_1306.d	Phosphorylation (STY)	S4:Phosphorylation (STY):14.04	Phosphorylation	1	5	5	77.4177	85.1236	312.252	325	3.04698	4	0.0463016
O95841|ANGL1_HUMAN	KRDNS(+79.97)LELSQLENK	54.74	585.285	0.7582-0.7865	0	0	0	84.5	24.4	87.7	P3phos_Slot2-12_1_1307.d	Phosphorylation (STY)	S5:Phosphorylation (STY):42.68	Phosphorylation	1	5	5	5	31.5123	23.6688	62.6	2.97279	3	0.036904
P17677|NEUM_HUMAN	AS(+79.97)TDNSPSSKAEDAPAKEEPK	25.6	746.997	0.9129-0.9411	NA	NA	NA	89.8	40.9	55	P3phos_Slot2-12_1_1307.d	Phosphorylation (STY)	S2:Phosphorylation (STY):0.00	Phosphorylation	1	5	5	5	33.4889	39.6465	39.2	2.90491	3	0.036904
Q16363|LAMA4_HUMAN	LAALS(+79.97)IEEGK	59.11	555.774	0.8486-0.8769	0	0	117	286	364	413	C3phos_Slot2-15_1_1310.d	Phosphorylation (STY)	S5:Phosphorylation (STY):1000.00	Phosphorylation	1	5	5	93.2571	106.806	353.152	295	2.86925	4	0.0463016
P20810|ICAL_HUMAN	EGITGPPADSSKPIGPDDAIDALSSDFTC(+57.02)GS(+79.97)PTAAGK	45.38	1228.22	1.1016-1.1296	NA	NA	NA	25.1	35.3	88.7	P2phos_Slot2-11_1_1306.d	Carbamidomethylation; Phosphorylation (STY)	C29:Carbamidomethylation:1000.00;S31:Phosphorylation (STY):20.70	Phosphorylation	1	5	5	5	9.34663	34.2457	63.3	2.83279	3	0.036904
P18206|VINC_HUMAN	GQGSS(+79.97)PVAMQK	52.13	585.255	0.8441-0.8723	0	0	67.7	272	140	260	P3phos_Slot2-12_1_1307.d	Phosphorylation (STY)	S5:Phosphorylation (STY):11.06	Phosphorylation	1	5	5	54.1251	101.443	135.478	185	2.71909	4	0.0463016
P22735|TGM1_HUMAN	WGGNPLQPPT(+79.97)TPSPEPEPEPDGR	40.37	1268.06	1.2524-1.2802	21.8	50.7	NA	396	235	205	P1phos_Slot2-10_1_1305.d	Phosphorylation (STY)	T10:Phosphorylation (STY):0.00	Phosphorylation	1	21.8	53.8691	5	147.569	228.01	146	2.69307	5	0.0495346
P12036|NFH_HUMAN	AKS(+79.97)PVKEEVKS(+79.97)PEK	43.3	858.406	1.0131-1.0411	NA	15.6	24.4	102	91.4	171	P1phos_Slot2-10_1_1305.d	Phosphorylation (STY)	S3:Phosphorylation (STY):1000.00;S11:Phosphorylation (STY):1000.00	Phosphorylation	2	5	16.5695	19.4633	38.0959	88.6316	122	2.60006	5	0.0495346
Q9UQ35|SRRM2_HUMAN	AQT(+79.97)PPGPSLSGSK	60	653.806	0.8690-0.8972	71.4	NA	0	289	138	342	P3phos_Slot2-12_1_1307.d	Phosphorylation (STY)	T3:Phosphorylation (STY):61.30	Phosphorylation	1	71.4	5	5	107.728	133.955	244	2.57776	4	0.0463016
Q71H61|ILDR2_HUMAN	AHSGFYQDDS(+79.97)LEEYYGQR	77.01	748.967	0.9163-0.9445	0	33.9	90.8	368	245	382	P2phos_Slot2-11_1_1306.d	Phosphorylation (STY)	S10:Phosphorylation (STY):67.69	Phosphorylation	1	5	36.0451	72.5831	137.175	237.416	273	2.50996	5	0.0495346
P12036|NFH_HUMAN	AKS(+79.97)PEKEEAKS(+79.97)PEK	37.64	859.376	1.0052-1.0333	NA	0	60.5	168	63.2	270	P2phos_Slot2-11_1_1306.d	Phosphorylation (STY)	S3:Phosphorylation (STY):1000.00;S11:Phosphorylation (STY):1000.00	Phosphorylation	2	5	5	48.333	62.7845	61.3111	193	2.44181	4	0.0463016
Q9H1E3|NUCKS_HUMAN	EEDEEPES(+79.97)PPEKK	47.58	811.825	0.9715-0.9996	NA	NA	58.2	141	114	200	P1phos_Slot2-10_1_1305.d	Phosphorylation (STY)	S8:Phosphorylation (STY):1000.00	Phosphorylation	1	5	5	46.527	52.5324	110.529	143	2.43454	4	0.0463016
P19338|NUCL_HUMAN	VVVS(+79.97)PTKK	34.01	469.259	0.7729-0.8012	NA	NA	180	613	163	601	P3phos_Slot2-12_1_1307.d	Phosphorylation (STY)	S4:Phosphorylation (STY):25.66	Phosphorylation	1	5	5	143.865	228.758	158.158	429	2.40603	4	0.0463016
Q66K74|MAP1S_HUMAN	AVPMAPAPAS(+79.97)PGSSNDSSAR	66.34	975.428	1.0736-1.1016	NA	NA	66.3	189	91.2	242	P3phos_Slot2-12_1_1307.d	Phosphorylation (STY)	S10:Phosphorylation (STY):12.16	Phosphorylation	1	5	5	52.9711	70.3888	88.397	172	2.39439	4	0.0463016
P10451|OSTP_HUMAN	AIPVAQDLNAPSDWDS(+79.97)RGKDSYETSQLDDQSAETHSHK	92.33	1070.48	0.9557-0.9838	863	0	440	3570	1320	4740	P2phos_Slot2-11_1_1306.d	Phosphorylation (STY)	S16:Phosphorylation (STY):14.19	Phosphorylation	1	863	5	351.284	1332.22	1276.53	3380	2.29566	5	0.0495346
Q68BL8|OLM2B_HUMAN	FLQEETVSQQINS(+79.97)IELLQTRPLALPEVVK	79.24	1134.94	1.1274-1.1553	38.5	72.4	NA	309	358	160	P2phos_Slot2-11_1_1306.d	Phosphorylation (STY)	S13:Phosphorylation (STY):47.92	Phosphorylation	1	38.5	76.9251	5	115.171	347.431	114	2.25963	5	0.0495346
P10451|OSTP_HUMAN	FRIS(+79.97)HELDS(+79.97)ASS(+79.97)EVN	62.86	965.859	1.0669-1.0949	0	1240	1700	7500	7570	3690	P1phos_Slot2-10_1_1305.d	Phosphorylation (STY)	S4:Phosphorylation (STY):93.60;S9:Phosphorylation (STY):48.87;S12:Phosphorylation (STY):14.02	Phosphorylation	3	5	1316.75	1358.34	2796.87	7344.13	2640	2.25311	5	0.0495346
P27824|CALX_HUMAN	AEEDEILNRS(+79.97)PR	49.41	754.842	0.9805-1.0086	NA	330	492	1500	1160	2490	P1phos_Slot2-10_1_1305.d	Phosphorylation (STY)	S10:Phosphorylation (STY):1000.00	Phosphorylation	1	5	350.807	392.918	559.485	1121.68	1770	2.20611	5	0.0495346
Q9H1E3|NUCKS_HUMAN	VVDYSQFQES(+79.97)DDADEDYGR	99.27	1159.44	1.1989-1.2268	271	205	533	1240	1800	2720	P2phos_Slot2-11_1_1306.d	Phosphorylation (STY)	S10:Phosphorylation (STY):98.37	Phosphorylation	1	271	218.028	425.602	462.148	1743.51	1940	2.1812	6	0.0495346
P10645|CMGA_HUMAN	KHSGFEDELSEVLENQS(+79.97)SQAELK	65.52	895.412	0.9456-0.9737	0	24.5	NA	87.5	59.8	100	P1phos_Slot2-10_1_1305.d	Phosphorylation (STY)	S17:Phosphorylation (STY):7.65	Phosphorylation	1	5	25.9834	5	32.6446	57.9514	71.6	2.17241	4	0.0463016
Q14767|LTBP2_HUMAN	GAGGQS(+79.97)MSEAPTGDHAPAPTR	64.22	692.291	0.7932-0.8215	0	36.5	50.8	143	203	181	P3phos_Slot2-12_1_1307.d	Phosphorylation (STY)	S6:Phosphorylation (STY):32.28	Phosphorylation	1	5	38.7674	40.5632	53.2372	197.089	129	2.1695	5	0.0495346
P29966|MARCS_HUMAN	EAPAEGEAAEPGSPT(+79.97)AAEGEAASAASSTSSPK	103.03	999.096	0.9827-1.0108	337	0	1340	3140	2070	4200	P2phos_Slot2-11_1_1306.d	Phosphorylation (STY)	T15:Phosphorylation (STY):5.47	Phosphorylation	1	337	5	1072.1	1171.33	2008.41	3000	2.12704	5	0.0495346
Q8WXD2|SCG3_HUMAN	LFPAPS(+79.97)EKSHEETDSTKEEAAK	59.88	837.718	0.9231-0.9512	715	749	1650	7080	5380	5360	C1phos_Slot2-13_1_1308.d	Phosphorylation (STY)	S6:Phosphorylation (STY):12.33	Phosphorylation	1	715	795.614	1320.38	2641.16	5214.71	3820	2.04436	6	0.0495346
P01042|KNG1_HUMAN	ET(+79.97)TC(+57.02)SKESNEELTESC(+57.02)ETK	71.68	781.311	0.8565-0.8848	148000	31100	76700	43400	19600	35600	P2phos_Slot2-11_1_1306.d	Phosphorylation (STY); Carbamidomethylation	T2:Phosphorylation (STY):12.33;C4:Carbamidomethylation:1000.00;C16:Carbamidomethylation:1000.00	Phosphorylation	1	148000	33038.2	61317.9	16188.6	18957.4	25400	-2.00109	6	0.0495346
P05060|SCG1_HUMAN	RDHHS(+79.97)THY(+79.97)RASEEEPEYGEEIK	66.1	715.537	0.8452-0.8735	6640	7090	12800	NA	NA	8390	C3phos_Slot2-15_1_1310.d	Phosphorylation (STY)	S5:Phosphorylation (STY):17.01;Y8:Phosphorylation (STY):0.00	Phosphorylation	2	6640	7531.17	10261.5	5	5	5990	-2.02657	4	0.0463016
Q9UK55|ZPI_HUMAN	VVQAPKEEEEDEQEAS(+79.97)EEK	68.89	761.663	0.8113-0.8396	3450	3010	4580	2670	1230	449	C3phos_Slot2-15_1_1310.d	Phosphorylation (STY)	S16:Phosphorylation (STY):1000.00	Phosphorylation	1	3450	3191.76	3661.16	995.079	1195.08	320	-2.03732	6	0.0495346
P49006|MRP_HUMAN	AAAT(+79.97)PESQEPQAK	73.53	704.313	0.9557-0.9838	462	617	348	584	0	154	C1phos_Slot2-13_1_1308.d	Phosphorylation (STY)	T4:Phosphorylation (STY):67.82	Phosphorylation	1	462	655.856	277.717	217.864	5	110	-2.06964	5	0.0495346
P51693|APLP1_HUMAN	DDTPMTLPKGST(+79.97)EQDAASPEK	41.83	1149.5	1.1788-1.2067	194	174	191	NA	NA	163	C2phos_Slot2-14_1_1309.d	Phosphorylation (STY)	T12:Phosphorylation (STY):0.00	Phosphorylation	1	194	184.57	152.991	5	5	117	-2.07032	4	0.0463016
P24593|IBP5_HUMAN	LPGM(+15.99)EYVDGDFQC(+57.02)HT(+79.97)FDSSNVE	40.98	1322.01	1.2501-1.2780	9570	7870	12600	12800	0	2280	C2phos_Slot2-14_1_1309.d	Oxidation (M); Carbamidomethylation; Phosphorylation (STY)	M4:Oxidation (M):1000.00;C13:Carbamidomethylation:1000.00;T15:Phosphorylation (STY):12.33	Phosphorylation	1	9570	8357.31	10062.5	4779.98	5	1630	-2.12553	5	0.0495346
P01189|COLI_HUMAN	VYPNGAEDES(+79.97)AEAFPLEFKR	37.82	1175.03	1.2178-1.2457	152	144	202	254	NA	NA	P1phos_Slot2-10_1_1305.d	Phosphorylation (STY)	S10:Phosphorylation (STY):19.48	Phosphorylation	1	152	152.525	161.773	94.8536	5	5	-2.15133	4	0.0463016
P20774|MIME_HUMAN	IIYDYGT(+79.97)DNFEES(+79.97)IFSQDYEDK	43.05	1426.05	1.3447-1.3724	161	125	132	38.6	NA	98.4	P1phos_Slot2-10_1_1305.d	Phosphorylation (STY)	T7:Phosphorylation (STY):18.61;S13:Phosphorylation (STY):8.28	Phosphorylation	2	161	132.27	105.452	14.4052	5	70.2	-2.1538	5	0.0495346
O43493|TGON2_HUMAN	SSAEAQTPEDTPNKS(+79.97)GAEAK	39.42	1049.45	1.0871-1.1151	63.2	53.9	55.7	71.6	NA	NA	P1phos_Slot2-10_1_1305.d	Phosphorylation (STY)	S15:Phosphorylation (STY):9.85	Phosphorylation	1	63.2	57.2042	44.5476	26.6939	5	5	-2.16812	4	0.0463016
P22105|TENX_HUMAN	LGPLSAEGTTGLAPAGQTS(+79.97)EESRPR	76.33	854.747	0.9332-0.9613	317	413	369	577	NA	0	P1phos_Slot2-10_1_1305.d	Phosphorylation (STY)	S19:Phosphorylation (STY):6.63	Phosphorylation	1	317	439.178	294.571	215.284	5	5	-2.2218	4	0.0463016
P05060|SCG1_HUMAN	GRGS(+79.97)EEYRAPRPQSEESWDEEDK	34.19	705.047	0.7989-0.8272	1450	621	714	1030	NA	92.3	C1phos_Slot2-13_1_1308.d	Phosphorylation (STY)	S4:Phosphorylation (STY):12.33	Phosphorylation	1	1450	659.808	570.498	385.397	5	65.8	-2.55291	5	0.0495346
P05060|SCG1_HUMAN	EELVARSETHAAGHS(+79.97)QEK	69.74	686.978	0.8272-0.8554	4840	3630	1830	546	1320	91.2	C2phos_Slot2-14_1_1309.d	Phosphorylation (STY)	S15:Phosphorylation (STY):95.35	Phosphorylation	1	4840	3859	1461.51	203.629	1282.05	65	-2.71156	6	0.0495346
P02751|FINC_HUMAN	HTSVQTT(+79.97)SSGSGPFTDVR	49.58	972.435	1.0770-1.1050	1590	825	1050	1250	NA	NA	C3phos_Slot2-15_1_1310.d	Phosphorylation (STY)	T7:Phosphorylation (STY):0.00	Phosphorylation	1	1590	875.775	839.074	467.145	5	5	-2.79104	4	0.0463016
Q13790|APOF_HUMAN	SYDLDPGAGS(+79.97)LEI	58.76	708.799	0.9197-0.9478	65.6	24.7	17.3	NA	NA	0	C2phos_Slot2-14_1_1309.d	Phosphorylation (STY)	S10:Phosphorylation (STY):37.64	Phosphorylation	1	65.6	26.2627	13.8239	5	5	5	-2.8164	3	0.036904
	STVADT(+79.97)SIQK	25.37	565.268	0.8260-0.8543	152	314	408	NA	86.4	NA	C1phos_Slot2-13_1_1308.d	Phosphorylation (STY)	T6:Phosphorylation (STY):27.96	Phosphorylation	1	152	333.982	325.872	5	83.7592	5	-3.1144	4	0.0463016
P02671|FIBA_HUMAN	QFTSSTSYNRGDS(+79.97)TFESK	40.54	707.963	0.8249-0.8532	574	147	1100	131	NA	181	C3phos_Slot2-15_1_1310.d	Phosphorylation (STY)	S13:Phosphorylation (STY):0.00	Phosphorylation	1	574	155.786	876.792	48.8813	5	129	-3.13548	5	0.0495346
P05408|7B2_HUMAN	SVPHFS(+79.97)DEDKDPE	57.42	791.309	0.9557-0.9838	35.6	60.5	48.4	NA	NA	NA	C1phos_Slot2-13_1_1308.d	Phosphorylation (STY)	S6:Phosphorylation (STY):17.07	Phosphorylation	1	35.6	64.2824	38.6637	5	5	5	-3.20713	3	0.036904
P0C0L4|CO4A_HUMAN:P0C0L5|CO4B_HUMAN	T(+79.97)FFRGLES(+79.97)QT(+79.97)K	24.87	777.284	0.9456-0.9737	245	225	280	159	NA	NA	C2phos_Slot2-14_1_1309.d	Phosphorylation (STY)	T1:Phosphorylation (STY):1000.00;S8:Phosphorylation (STY):1000.00;T10:Phosphorylation (STY):1000.00	Phosphorylation	3	245	239.271	223.729	59.4541	5	5	-3.35059	4	0.0463016
Q8IXL6|FA20C_HUMAN	VAVPPLTEEDVLFNVNS(+79.97)DTRLSPK	45.42	907.461	0.9883-1.0164	45.5	47	89.7	NA	NA	NA	C1phos_Slot2-13_1_1308.d	Phosphorylation (STY)	S17:Phosphorylation (STY):0.00	Phosphorylation	1	45.5	49.8902	71.6529	5	5	5	-3.47706	3	0.036904
P29966|MARCS_HUMAN	GEAAAERPGEAAVASSPS(+79.97)K	75.3	622.285	0.8486-0.8769	398	361	259	149	NA	NA	C1phos_Slot2-13_1_1308.d	Phosphorylation (STY)	S18:Phosphorylation (STY):4.52	Phosphorylation	1	398	382.905	207.067	55.4898	5	5	-3.91454	4	0.0463016
Q96DZ5|CLIP3_HUMAN	TPSS(+79.97)PSLGSLQQR	49.16	719.342	0.9287-0.9568	106	70.1	64.4	NA	NA	NA	C1phos_Slot2-13_1_1308.d	Phosphorylation (STY)	S4:Phosphorylation (STY):22.45	Phosphorylation	1	106	74.5003	51.4744	5	5	5	-3.94813	3	0.036904
P17677|NEUM_HUMAN	ASTDNS(+79.97)PSSKAEDAPAK	58.6	878.377	1.0490-1.0770	112	75.4	84.5	0	NA	0	C3phos_Slot2-15_1_1310.d	Phosphorylation (STY)	S6:Phosphorylation (STY):11.12	Phosphorylation	1	112	80.0744	67.4871	5	5	5	-4.11504	3	0.036904
P04406|G3P_HUMAN	VVDLMAHMAS(+79.97)KE	53.56	705.812	0.9355-0.9636	133	183	41.3	NA	NA	NA	C2phos_Slot2-14_1_1309.d	Phosphorylation (STY)	S10:Phosphorylation (STY):1000.00	Phosphorylation	1	133	194.427	32.9916	5	5	5	-4.58479	3	0.036904
P05060|SCG1_HUMAN	GHPQEESEESNVS(+79.97)M(+15.99)ASLGEK	62.24	747.635	0.8249-0.8532	318	60.2	382	38.6	NA	0	C1phos_Slot2-13_1_1308.d	Phosphorylation (STY); Oxidation (M)	S13:Phosphorylation (STY):24.24;M14:Oxidation (M):1000.00	Phosphorylation	1	318	63.8958	305.175	14.3903	5	5	-4.8161	4	0.0463016
Q4LDG9|DNAL1_HUMAN	LSLS(+79.97)TNC(+57.02)IEK	38.27	622.781	0.8735-0.9017	210	156	123	NA	NA	NA	C2phos_Slot2-14_1_1309.d	Phosphorylation (STY); Carbamidomethylation	S4:Phosphorylation (STY):11.06;C7:Carbamidomethylation:1000.00	Phosphorylation	1	210	165.313	98.2915	5	5	5	-4.98168	3	0.036904
P07357|CO8A_HUMAN	INVGGGLS(+79.97)GDHC(+57.02)K	27.78	697.306	0.8983-0.9265	47.7	145	349	NA	NA	NA	C3phos_Slot2-15_1_1310.d	Phosphorylation (STY); Carbamidomethylation	S8:Phosphorylation (STY):1000.00;C12:Carbamidomethylation:1000.00	Phosphorylation	1	47.7	154.022	278.844	5	5	5	-5.00162	3	0.036904
P23246|SFPQ_HUMAN	T(+42.01)(+79.97)ERFGQGGAGPVGGQGPRGMGPGT(+79.97)PAGYGR	26.51	1011.12	1.0310-1.0591	350	31.7	122	NA	NA	NA	C3phos_Slot2-15_1_1310.d	Acetylation (Protein N-term); Phosphorylation (STY)	T1:Acetylation (Protein N-term):1000.00;T1:Phosphorylation (STY):22.61;T24:Phosphorylation (STY):58.99	Phosphorylation	2	350	33.7169	97.1488	5	5	5	-5.00182	3	0.036904
P01210|PENK_HUMAN	RFAEALPSDEEGESYS(+79.97)K	63.11	665.614	0.7910-0.8193	696	102	417	NA	NA	25.5	C2phos_Slot2-14_1_1309.d	Phosphorylation (STY)	S16:Phosphorylation (STY):0.00	Phosphorylation	1	696	108.329	333.008	5	5	18.2	-5.33395	4	0.0463016
P35555|FBN1_HUMAN	GNPEPPVSGEM(+15.99)DDNS(+79.97)LSPEAC(+57.02)YEC(+57.02)K	65.51	960.037	0.9535-0.9816	1450	992	1120	NA	NA	95.2	C3phos_Slot2-15_1_1310.d	Oxidation (M); Phosphorylation (STY); Carbamidomethylation	M11:Oxidation (M):1000.00;S15:Phosphorylation (STY):8.82;C21:Carbamidomethylation:1000.00;C24:Carbamidomethylation:1000.00	Phosphorylation	1	1450	1054.08	897.569	5	5	67.9	-5.4472	4	0.0463016
Q86Y38|XYLT1_HUMAN	KTGGSS(+79.97)PETKYDQPPK	54.25	600.61	0.8147-0.8430	367	152	341	NA	NA	NA	C2phos_Slot2-14_1_1309.d	Phosphorylation (STY)	S6:Phosphorylation (STY):0.00	Phosphorylation	1	367	161.595	272.763	5	5	5	-5.74017	3	0.036904
P05060|SCG1_HUMAN	ADEPQWSLYPS(+79.97)DSQVSEEVK	48.6	1187.51	1.2078-1.2357	14300	21400	23800	773	NA	596	P3phos_Slot2-12_1_1307.d	Phosphorylation (STY)	S11:Phosphorylation (STY):0.00	Phosphorylation	1	14300	22726.8	19015.8	288.324	5	425	-6.28486	5	0.0495346
P29966|MARCS_HUMAN	EAPAEGEAAEPGSPTAAEGEAASAASSTSS(+79.97)PK	85.97	999.102	1.0490-1.0770	781	418	211	NA	NA	0	C3phos_Slot2-15_1_1310.d	Phosphorylation (STY)	S30:Phosphorylation (STY):14.02	Phosphorylation	1	781	444.329	168.262	5	5	5	-6.53817	3	0.036904
Q8WXD2|SCG3_HUMAN	LFPAPSEKS(+79.97)HEETDS(+79.97)TKEEAAK	35.99	864.368	0.8904-0.9186	1090	622	739	NA	NA	NA	C1phos_Slot2-13_1_1308.d	Phosphorylation (STY)	S9:Phosphorylation (STY):3.13;S15:Phosphorylation (STY):0.00	Phosphorylation	2	1090	660.997	590.492	5	5	5	-7.28626	3	0.036904
P51397|DAP1_HUMAN	S(+42.01)(+79.97)SPPEGKLETK	32.54	647.799	0.8893-0.9174	1010	689	902	NA	NA	NA	C1phos_Slot2-13_1_1308.d	Acetylation (Protein N-term); Phosphorylation (STY)	S1:Acetylation (Protein N-term):1000.00;S1:Phosphorylation (STY):0.00	Phosphorylation	1	1010	731.726	720.589	5	5	5	-7.35762	3	0.036904
P08670|VIME_HUMAN	Q(+42.01)ESTEY(+79.97)RR	18.26	595.749	0.8464-0.8746	1050	1490	262	NA	NA	NA	C2phos_Slot2-14_1_1309.d	Acetylation (Protein N-term); Phosphorylation (STY)	Q1:Acetylation (Protein N-term):1000.00;Y6:Phosphorylation (STY):28.36	Phosphorylation	1	1050	1586.85	209.649	5	5	5	-7.56905	3	0.036904
P05060|SCG1_HUMAN	RDHHS(+79.97)THYRASEEEPEYGEEIK	55.57	695.544	0.8328-0.8611	3550	2340	725	61.1	0	0	C3phos_Slot2-15_1_1310.d	Phosphorylation (STY)	S5:Phosphorylation (STY):17.01	Phosphorylation	1	3550	2481.71	579.56	22.777	5	5	-7.65532	4	0.0463016
	S(+42.01)MQDVVEDYKS(+79.97)K	26.27	775.826	0.9838-1.0119	3560	799	846	NA	NA	NA	C1phos_Slot2-13_1_1308.d	Acetylation (Protein N-term); Phosphorylation (STY)	S1:Acetylation (Protein N-term):1000.00;S11:Phosphorylation (STY):0.00	Phosphorylation	1	3560	848.594	676.046	5	5	5	-8.40617	3	0.036904
P11021|BIP_HUMAN	LYGSAGPPPT(+79.97)GEEDTAEKDEL	40.21	1128.48	1.1676-1.1955	3430	2580	3480	NA	NA	NA	C2phos_Slot2-14_1_1309.d	Phosphorylation (STY)	T10:Phosphorylation (STY):10.19	Phosphorylation	1	3430	2735.04	2784.29	5	5	5	-9.22069	3	0.036904
P02461|CO3A1_HUMAN	A(+42.01)SQNIT(+79.97)YHC(+57.02)K	33.18	672.287	0.8904-0.9186	3760	2750	6700	NA	NA	NA	C3phos_Slot2-15_1_1310.d	Acetylation (Protein N-term); Phosphorylation (STY); Carbamidomethylation	A1:Acetylation (Protein N-term):1000.00;T6:Phosphorylation (STY):23.10;C9:Carbamidomethylation:1000.00	Phosphorylation	1	3760	2921.76	5356.41	5	5	5	-9.64895	3	0.036904
P10451|OSTP_HUMAN	FRRPDIQY(+79.97)PDAT(+79.97)DEDITSHMESEELNGAYK	32.92	1229.86	1.0703-1.0983	5080	7130	6120	0	NA	0	P3phos_Slot2-12_1_1307.d	Phosphorylation (STY)	Y8:Phosphorylation (STY):18.61;T12:Phosphorylation (STY):30.64	Phosphorylation	2	5080	7575.25	4887.88	5	5	5	-10.192	3	0.036904

## Sheet: protein-KW final
Accession	Description	#Unique	PTM	Coverage (%)	Area Sample 1_C1	Area Sample 2_C2	Area Sample 3_C3	Area Sample 4_P1	Area Sample 5_P2	Area Sample 6_P3	N_C1	N_C2	N_C3	N_P1	N_P2	N_P3	log2(P/C)	in samples	KW.test.p.value
Q8NEL9|DDHD1_HUMAN	Phospholipase DDHD1 OS=Homo sapiens OX=9606 GN=DDHD1 PE=1 SV=2	3	Acetylation (Protein N-term)	3		0	0	186.6	794.88	35527	10	10	10	184.589	749.165	35564.2	10.2486	3	0.036904
P28289|TMOD1_HUMAN	Tropomodulin-1 OS=Homo sapiens OX=9606 GN=TMOD1 PE=1 SV=1	5	Acetylation (Protein N-term)	19	0			10312	304.07	535.57	10	10	10	10200.9	286.582	536.131	8.52141	3	0.036904
P16402|H13_HUMAN	Histone H1.3 OS=Homo sapiens OX=9606 GN=HIST1H1D PE=1 SV=2	5	Acetylation (Protein N-term)	16			0	219.56	3172	1628.3	10	10	10	217.194	2989.57	1630.01	7.33294	3	0.036904
P06748|NPM_HUMAN	Nucleophosmin OS=Homo sapiens OX=9606 GN=NPM1 PE=1 SV=2	10	Oxidation (M)	48			0	2240.3	1273.6	1014	10	10	10	2216.16	1200.35	1015.06	7.20671	3	0.036904
Q04721|NOTC2_HUMAN	Neurogenic locus notch homolog protein 2 OS=Homo sapiens OX=9606 GN=NOTCH2 PE=1 SV=3	5	Carbamidomethylation; Acetylation (Protein N-term)	3		34.034		6142.6	61.596	136.18	10	34.641	10	6076.4	58.0535	136.323	6.84252	4	0.0463016
O00442|RTCA_HUMAN	RNA 3'-terminal phosphate cyclase OS=Homo sapiens OX=9606 GN=RTCA PE=1 SV=1	3	Carbamidomethylation; Oxidation (M)	25				1943.4	1480.5	81.619	10	10	10	1922.46	1395.35	81.7045	6.82422	3	0.036904
Q02790|FKBP4_HUMAN	Peptidyl-prolyl cis-trans isomerase FKBP4 OS=Homo sapiens OX=9606 GN=FKBP4 PE=1 SV=3	6	Carbamidomethylation; Acetylation (Protein N-term)	17	0	0		1023.3	1892.5	401.62	10	10	10	1012.27	1783.66	402.041	6.73605	3	0.036904
A0A0C4DH67|KV108_HUMAN	Immunoglobulin kappa variable 1-8 OS=Homo sapiens OX=9606 GN=IGKV1-8 PE=3 SV=1	3	Carbamidomethylation	45	13.84	0		1315.8	2177.4	25.531	13.84	10	10	1301.62	2052.17	25.5578	6.64187	4	0.0463016
Q13838|DX39B_HUMAN	Spliceosome RNA helicase DDX39B OS=Homo sapiens OX=9606 GN=DDX39B PE=1 SV=1	8	Carbamidomethylation; Oxidation (M); Acetylation (Protein N-term)	23			0	2115.1	337.53	140.04	10	10	10	2092.31	318.118	140.187	6.40974	3	0.036904
P10809|CH60_HUMAN	60 kDa heat shock protein mitochondrial OS=Homo sapiens OX=9606 GN=HSPD1 PE=1 SV=2	8	Carbamidomethylation; Oxidation (M); Acetylation (Protein N-term)	23	45.951	38.084	13.719	284.59	8233.6	193.23	45.951	38.7632	13.6186	281.523	7760.07	193.433	6.38796	6	0.0495346
Q9UH65|SWP70_HUMAN	Switch-associated protein 70 OS=Homo sapiens OX=9606 GN=SWAP70 PE=1 SV=1	3	Carbamidomethylation	8				2327.9	86.68	109.77	10	10	10	2302.81	81.6948	109.885	6.37758	3	0.036904
P17858|PFKAL_HUMAN	ATP-dependent 6-phosphofructokinase liver type OS=Homo sapiens OX=9606 GN=PFKL PE=1 SV=6	7	Carbamidomethylation; Acetylation (Protein N-term)	15		15.363		144.29	1576.6	1315	10	15.637	10	142.735	1485.93	1316.38	6.36877	4	0.0463016
O00148|DX39A_HUMAN	ATP-dependent RNA helicase DDX39A OS=Homo sapiens OX=9606 GN=DDX39A PE=1 SV=2	3		7				1780.3	337.53	140.04	10	10	10	1761.11	318.118	140.187	6.20908	3	0.036904
P53041|PPP5_HUMAN	Serine/threonine-protein phosphatase 5 OS=Homo sapiens OX=9606 GN=PPP5C PE=1 SV=1	7	Carbamidomethylation; Acetylation (Protein N-term)	15			0	189.39	168.27	1638.4	10	10	10	187.349	158.592	1640.12	6.0488	3	0.036904
Q08495|DEMA_HUMAN	Dematin OS=Homo sapiens OX=9606 GN=DMTN PE=1 SV=3	10		22		24.804		350.11	30.131	1990.2	10	25.2464	10	346.337	28.3981	1992.29	5.70913	4	0.0463016
Q8NFZ4|NLGN2_HUMAN	Neuroligin-2 OS=Homo sapiens OX=9606 GN=NLGN2 PE=1 SV=1	8	Carbamidomethylation; Acetylation (Protein N-term)	15	0	0	22.88	1437.2	86.653	435.06	10	10	22.7125	1421.71	81.6694	435.516	5.50443	4	0.0463016
Q9BY32|ITPA_HUMAN	Inosine triphosphate pyrophosphatase OS=Homo sapiens OX=9606 GN=ITPA PE=1 SV=2	2		13				443.31	351.15	465.34	10	10	10	438.532	330.955	465.828	5.36377	3	0.036904
P24158|PRTN3_HUMAN	Myeloblastin OS=Homo sapiens OX=9606 GN=PRTN3 PE=1 SV=3	2	Carbamidomethylation	17	433.16			2437.2	7648.2	5695.6	433.16	10	10	2410.93	7208.33	5701.57	5.07933	4	0.0463016
P80188|NGAL_HUMAN	Neutrophil gelatinase-associated lipocalin OS=Homo sapiens OX=9606 GN=LCN2 PE=1 SV=2	5	Acetylation (Protein N-term)	35		36.151	0	1467.4	165.52	204.62	10	36.7958	10	1451.59	156.001	204.834	4.99599	4	0.0463016
Q504Y0|S39AC_HUMAN	Zinc transporter ZIP12 OS=Homo sapiens OX=9606 GN=SLC39A12 PE=2 SV=3	14	Carbamidomethylation; Oxidation (M); Acetylation (Protein N-term)	31	96.529	298.19	110.47	7753.6	493.57	7779.6	96.529	303.508	109.661	7670.04	465.184	7787.75	4.96532	6	0.0495346
O95810|CAVN2_HUMAN	Caveolae-associated protein 2 OS=Homo sapiens OX=9606 GN=CAVIN2 PE=1 SV=3	6	Oxidation (M); Acetylation (Protein N-term)	16			0	155.93	482.32	222.51	10	10	10	154.25	454.581	222.743	4.79281	3	0.036904
Q9GZX3|CHST6_HUMAN	Carbohydrate sulfotransferase 6 OS=Homo sapiens OX=9606 GN=CHST6 PE=1 SV=1	3	Acetylation (Protein N-term)	13	0			355.05	60.808	415.46	10	10	10	351.224	57.3108	415.895	4.78036	3	0.036904
P35611|ADDA_HUMAN	Alpha-adducin OS=Homo sapiens OX=9606 GN=ADD1 PE=1 SV=2	13	Acetylation (Protein N-term)	25	457.26	21.175	291.89	2092.9	1282.2	16627	457.26	21.5527	289.753	2070.34	1208.46	16644.4	4.69614	6	0.0495346
P10412|H14_HUMAN	Histone H1.4 OS=Homo sapiens OX=9606 GN=HIST1H1E PE=1 SV=2	6	Acetylation (Protein N-term)	25	171.27		0	219.56	3172	1628.3	171.27	10	10	217.194	2989.57	1630.01	4.66036	4	0.0463016
P02511|CRYAB_HUMAN	Alpha-crystallin B chain OS=Homo sapiens OX=9606 GN=CRYAB PE=1 SV=2	4	Oxidation (M); Acetylation (Protein N-term)	25	0	0		54.399	673.38	62.943	10	10	10	53.8127	634.652	63.009	4.64669	3	0.036904
O00587|MFNG_HUMAN	Beta-1 3-N-acetylglucosaminyltransferase manic fringe OS=Homo sapiens OX=9606 GN=MFNG PE=1 SV=2	2		8				84.417	689.05	11.922	10	10	10	83.5072	649.421	11.9345	4.63394	3	0.036904
P81172|HEPC_HUMAN	Hepcidin OS=Homo sapiens OX=9606 GN=HAMP PE=1 SV=2	2	Carbamidomethylation; Acetylation (Protein N-term)	36		60.252		465.85	447.72	1110.5	10	61.3266	10	460.829	421.971	1111.66	4.61613	4	0.0463016
P08476|INHBA_HUMAN	Inhibin beta A chain OS=Homo sapiens OX=9606 GN=INHBA PE=1 SV=2	11	Carbamidomethylation; Acetylation (Protein N-term)	32	59.784	21.989		1808.3	225.59	232.46	59.784	22.3812	10	1788.81	212.616	232.704	4.59935	5	0.0495346
O15204|ADEC1_HUMAN	ADAM DEC1 OS=Homo sapiens OX=9606 GN=ADAMDEC1 PE=1 SV=2	7	Carbamidomethylation; Oxidation (M)	25	41.709	13.682	0	438.54	55.603	972.49	41.709	13.926	10	433.814	52.4051	973.509	4.47509	5	0.0495346
P16403|H12_HUMAN	Histone H1.2 OS=Homo sapiens OX=9606 GN=HIST1H1C PE=1 SV=2	8	Acetylation (Protein N-term)	34	0	196.53	0	219.56	3172	1628.3	10	200.035	10	217.194	2989.57	1630.01	4.45824	4	0.0463016
Q07812|BAX_HUMAN	Apoptosis regulator BAX OS=Homo sapiens OX=9606 GN=BAX PE=1 SV=1	5	Carbamidomethylation; Acetylation (Protein N-term)	34	0		0	100.93	43.715	457.4	10	10	10	99.8423	41.2008	457.879	4.31933	3	0.036904
O14576|DC1I1_HUMAN	Cytoplasmic dynein 1 intermediate chain 1 OS=Homo sapiens OX=9606 GN=DYNC1I1 PE=1 SV=2	9	Acetylation (Protein N-term)	13		36.589		213.36	134.88	684.96	10	37.2416	10	211.061	127.123	685.678	4.16081	4	0.0463016
Q9BXX0|EMIL2_HUMAN	EMILIN-2 OS=Homo sapiens OX=9606 GN=EMILIN2 PE=1 SV=3	31	Carbamidomethylation; Oxidation (M); Acetylation (Protein N-term)	36	1054.2	2266.3	1240.1	55616	18684	2702.3	1054.2	2306.72	1231.02	55016.6	17609.4	2705.13	4.03607	6	0.0495346
O14773|TPP1_HUMAN	Tripeptidyl-peptidase 1 OS=Homo sapiens OX=9606 GN=TPP1 PE=1 SV=2	3		6			38.727	342.32	389.51	230.99	10	10	38.4435	338.631	367.108	231.232	4.00289	4	0.0463016
P49720|PSB3_HUMAN	Proteasome subunit beta type-3 OS=Homo sapiens OX=9606 GN=PSMB3 PE=1 SV=2	3	Carbamidomethylation; Oxidation (M); Acetylation (Protein N-term)	21			0	256.3	35.41	193.04	10	10	10	253.538	33.3735	193.242	4.00046	3	0.036904
P35998|PRS7_HUMAN	26S proteasome regulatory subunit 7 OS=Homo sapiens OX=9606 GN=PSMC2 PE=1 SV=3	8	Oxidation (M); Acetylation (Protein N-term)	20			94.482	156	735.75	866.49	10	10	93.7904	154.319	693.435	867.398	3.91389	4	0.0463016
P0C0S5|H2AZ_HUMAN	Histone H2A.Z OS=Homo sapiens OX=9606 GN=H2AFZ PE=1 SV=2	4		62			64.775	83.756	148.72	947.05	10	10	64.3008	82.8533	140.167	948.043	3.79613	4	0.0463016
Q96JK4|HIPL1_HUMAN	HHIP-like protein 1 OS=Homo sapiens OX=9606 GN=HHIPL1 PE=2 SV=2	8	Carbamidomethylation; Acetylation (Protein N-term)	15	0		83.431	548.04	404.24	486	10	10	82.8203	542.134	380.991	486.509	3.77712	4	0.0463016
P08949|NMB_HUMAN	Neuromedin-B OS=Homo sapiens OX=9606 GN=NMB PE=1 SV=4	3	Acetylation (Protein N-term)	38	0	0	0	104.64	70.096	236.93	10	10	10	103.512	66.0646	237.178	3.76113	3	0.036904
P78371|TCPB_HUMAN	T-complex protein 1 subunit beta OS=Homo sapiens OX=9606 GN=CCT2 PE=1 SV=4	19	Carbamidomethylation; Oxidation (M); Acetylation (Protein N-term)	45	132.2	154.64	87.063	1309.7	184.63	3604.6	132.2	157.398	86.4257	1295.59	174.011	3608.38	3.75536	6	0.0495346
Q9H0U4|RAB1B_HUMAN	Ras-related protein Rab-1B OS=Homo sapiens OX=9606 GN=RAB1B PE=1 SV=1	6	Oxidation (M)	29	83.257	110.3		286.86	1763.5	803.41	83.257	112.267	10	283.768	1662.08	804.252	3.7421	5	0.0495346
P30990|NEUT_HUMAN	Neurotensin/neuromedin N OS=Homo sapiens OX=9606 GN=NTS PE=1 SV=2	3	Carbamidomethylation; Oxidation (M)	46	0			48.589	159.62	189.98	10	10	10	48.0653	150.44	190.179	3.69556	3	0.036904
P09429|HMGB1_HUMAN	High mobility group protein B1 OS=Homo sapiens OX=9606 GN=HMGB1 PE=1 SV=3	6	Carbamidomethylation; Acetylation (Protein N-term)	31	95.831		57.425	322.32	1519.4	343.66	95.831	10	57.0046	318.846	1432.02	344.02	3.68538	5	0.0495346
P50993|AT1A2_HUMAN	Sodium/potassium-transporting ATPase subunit alpha-2 OS=Homo sapiens OX=9606 GN=ATP1A2 PE=1 SV=1	6	Carbamidomethylation; Oxidation (M); Acetylation (Protein N-term)	23			0	37.207	48.443	277.51	10	10	10	36.806	45.6569	277.801	3.58602	3	0.036904
Q9GZP0|PDGFD_HUMAN	Platelet-derived growth factor D OS=Homo sapiens OX=9606 GN=PDGFD PE=1 SV=1	8	Carbamidomethylation	19	70.238	139.36	38.624	589.93	793.99	1626.9	70.238	141.846	38.3413	583.572	748.326	1628.6	3.56339	6	0.0495346
P20023|CR2_HUMAN	Complement receptor type 2 OS=Homo sapiens OX=9606 GN=CR2 PE=1 SV=2	5	Carbamidomethylation; Oxidation (M)	6	0			14.404	41.186	301.01	10	10	10	14.2488	38.8173	301.325	3.56231	3	0.036904
Q15233|NONO_HUMAN	Non-POU domain-containing octamer-binding protein OS=Homo sapiens OX=9606 GN=NONO PE=1 SV=4	6	Oxidation (M); Acetylation (Protein N-term)	15	19.257			25.728	65.221	353.69	19.257	10	10	25.4507	61.47	354.061	3.4897	4	0.0463016
P19338|NUCL_HUMAN	Nucleolin OS=Homo sapiens OX=9606 GN=NCL PE=1 SV=3	10	Carbamidomethylation; Acetylation (Protein N-term)	14	90.413		271.76	810.72	2688.4	798.98	90.413	10	269.771	801.983	2533.78	799.817	3.48178	5	0.0495346
A0A0C4DH68|KV224_HUMAN	Immunoglobulin kappa variable 2-24 OS=Homo sapiens OX=9606 GN=IGKV2-24 PE=3 SV=1	2		38	277.51	0		2182.5	850.34	318.79	277.51	10	10	2158.98	801.435	319.124	3.46248	4	0.0463016
O60749|SNX2_HUMAN	Sorting nexin-2 OS=Homo sapiens OX=9606 GN=SNX2 PE=1 SV=2	4		10	35.95			130.06	95.833	373.97	35.95	10	10	128.658	90.3214	374.362	3.40665	4	0.0463016
O60664|PLIN3_HUMAN	Perilipin-3 OS=Homo sapiens OX=9606 GN=PLIN3 PE=1 SV=3	7	Oxidation (M); Acetylation (Protein N-term)	21	123.6	114.2	465.7	638.61	6442.8	563.92	123.6	116.237	462.291	631.728	6072.26	564.511	3.37185	6	0.0495346
P14866|HNRPL_HUMAN	Heterogeneous nuclear ribonucleoprotein L OS=Homo sapiens OX=9606 GN=HNRNPL PE=1 SV=2	11	Carbamidomethylation; Oxidation (M); Acetylation (Protein N-term)	21	0	213.27	85.36	1834.6	307.9	923.6	10	217.074	84.7352	1814.83	290.192	924.568	3.28039	5	0.0495346
O95861|BPNT1_HUMAN	3'(2') 5'-bisphosphate nucleotidase 1 OS=Homo sapiens OX=9606 GN=BPNT1 PE=1 SV=1	4	Carbamidomethylation	21	0			58.329	64.947	167.74	10	10	10	57.7004	61.2117	167.916	3.25715	3	0.036904
Q71UI9|H2AV_HUMAN	Histone H2A.V OS=Homo sapiens OX=9606 GN=H2AFV PE=1 SV=3	3		54			64.775	83.756	148.72	581.33	10	10	64.3008	82.8533	140.167	581.939	3.2553	4	0.0463016
P26583|HMGB2_HUMAN	High mobility group protein B2 OS=Homo sapiens OX=9606 GN=HMGB2 PE=1 SV=2	4	Carbamidomethylation	30	142.86		0	648.24	638.95	306.55	142.86	10	10	641.254	602.202	306.871	3.25087	4	0.0463016
P23246|SFPQ_HUMAN	Splicing factor proline- and glutamine-rich OS=Homo sapiens OX=9606 GN=SFPQ PE=1 SV=2	14	Oxidation (M); Acetylation (Protein N-term)	23		36.185	31.968	268.36	374.81	91.301	10	36.8304	31.734	265.468	353.254	91.3967	3.17611	5	0.0495346
Q16777|H2A2C_HUMAN	Histone H2A type 2-C OS=Homo sapiens OX=9606 GN=HIST2H2AC PE=1 SV=4	4	Oxidation (M); Acetylation (Protein N-term)	67	361.81	297.43	1105.1	1183.8	10358	4147.4	361.81	302.735	1097.01	1171.04	9762.29	4151.75	3.0982	6	0.0495346
Q6FI13|H2A2A_HUMAN	Histone H2A type 2-A OS=Homo sapiens OX=9606 GN=HIST2H2AA3 PE=1 SV=3	4	Oxidation (M); Acetylation (Protein N-term)	66	361.81	297.43	1105.1	1183.8	10358	4147.4	361.81	302.735	1097.01	1171.04	9762.29	4151.75	3.0982	6	0.0495346
P61158|ARP3_HUMAN	Actin-related protein 3 OS=Homo sapiens OX=9606 GN=ACTR3 PE=1 SV=3	9	Carbamidomethylation; Acetylation (Protein N-term)	31	26.517	83.335	76.895	375.53	887.76	392.18	26.517	84.8213	76.3321	371.483	836.703	392.591	3.0925	6	0.0495346
P09601|HMOX1_HUMAN	Heme oxygenase 1 OS=Homo sapiens OX=9606 GN=HMOX1 PE=1 SV=1	2	Acetylation (Protein N-term)	14				124.8	55.203	69.619	10	10	10	123.455	52.0281	69.692	3.03078	3	0.036904
P50995|ANX11_HUMAN	Annexin A11 OS=Homo sapiens OX=9606 GN=ANXA11 PE=1 SV=1	9	Carbamidomethylation; Acetylation (Protein N-term)	19	213.75	73.066	0	1828.8	377.6	250.85	213.75	74.3692	10	1809.09	355.883	251.113	3.01871	5	0.0495346
P27695|APEX1_HUMAN	DNA-(apurinic or apyrimidinic site) lyase OS=Homo sapiens OX=9606 GN=APEX1 PE=1 SV=2	7	Carbamidomethylation; Acetylation (Protein N-term)	26		8.6199	40.876	64.799	334.69	98.902	10	8.77364	40.5768	64.1006	315.441	99.0056	3.01133	5	0.0495346
Q9Y333|LSM2_HUMAN	U6 snRNA-associated Sm-like protein LSm2 OS=Homo sapiens OX=9606 GN=LSM2 PE=1 SV=1	2	Carbamidomethylation	41				92.813	78.124	65.973	10	10	10	91.8127	73.6309	66.0421	2.94789	3	0.036904
Q06323|PSME1_HUMAN	Proteasome activator complex subunit 1 OS=Homo sapiens OX=9606 GN=PSME1 PE=1 SV=1	16	Carbamidomethylation; Acetylation (Protein N-term)	57	0	971.49	1102.1	6275.8	4077.6	6090.1	10	988.817	1094.03	6208.16	3843.09	6096.48	2.94779	5	0.0495346
P04839|CY24B_HUMAN	Cytochrome b-245 heavy chain OS=Homo sapiens OX=9606 GN=CYBB PE=1 SV=2	5	Carbamidomethylation; Oxidation (M); Acetylation (Protein N-term)	11		29.498	0	248.36	107.19	37.896	10	30.0241	10	245.683	101.025	37.9357	2.94283	4	0.0463016
P08670|VIME_HUMAN	Vimentin OS=Homo sapiens OX=9606 GN=VIM PE=1 SV=4	34	Carbamidomethylation; Oxidation (M); Acetylation (Protein N-term)	65	2205.3	743.09	1203.4	5615.9	14437	12755	2205.3	756.343	1194.59	5555.38	13606.7	12768.4	2.94158	6	0.0495346
Q96AE4|FUBP1_HUMAN	Far upstream element-binding protein 1 OS=Homo sapiens OX=9606 GN=FUBP1 PE=1 SV=3	2		6				131.48	19.351	75.252	10	10	10	130.063	18.2381	75.3309	2.89809	3	0.036904
Q99542|MMP19_HUMAN	Matrix metalloproteinase-19 OS=Homo sapiens OX=9606 GN=MMP19 PE=1 SV=1	5	Carbamidomethylation; Acetylation (Protein N-term)	9		0	80.726	323.67	152.85	276.71	10	10	80.1351	320.182	144.059	277	2.888	4	0.0463016
P04233|HG2A_HUMAN	HLA class II histocompatibility antigen gamma chain OS=Homo sapiens OX=9606 GN=CD74 PE=1 SV=3	8	Carbamidomethylation; Oxidation (M); Acetylation (Protein N-term)	47	134.85	149.24	108.47	1795.1	471	453.71	134.85	151.902	107.676	1775.75	443.912	454.185	2.76109	6	0.0495346
P25787|PSA2_HUMAN	Proteasome subunit alpha type-2 OS=Homo sapiens OX=9606 GN=PSMA2 PE=1 SV=2	3		22		29.582		106.43	159.33	81.679	10	30.1096	10	105.283	150.167	81.7646	2.75051	4	0.0463016
Q92597|NDRG1_HUMAN	Protein NDRG1 OS=Homo sapiens OX=9606 GN=NDRG1 PE=1 SV=1	2		9	0		24.427	58.015	31.688	205.51	10	10	24.2482	57.3898	29.8655	205.725	2.72712	4	0.0463016
Q9Y5S9|RBM8A_HUMAN	RNA-binding protein 8A OS=Homo sapiens OX=9606 GN=RBM8A PE=1 SV=1	3		11				71.087	55.233	73.593	10	10	10	70.3209	52.0564	73.6701	2.70817	3	0.036904
Q9Y376|CAB39_HUMAN	Calcium-binding protein 39 OS=Homo sapiens OX=9606 GN=CAB39 PE=1 SV=1	7	Carbamidomethylation; Oxidation (M)	38	85.387	125.08	69.085	749.69	333.36	781.32	85.387	127.311	68.5793	741.61	314.188	782.139	2.70802	6	0.0495346
P62805|H4_HUMAN	Histone H4 OS=Homo sapiens OX=9606 GN=HIST1H4A PE=1 SV=2	10	Oxidation (M)	54	197.29	445.47	6828.4	7556	23254	15663	197.29	453.415	6778.42	7474.57	21916.6	15679.4	2.60092	6	0.0495346
Q07666|KHDR1_HUMAN	KH domain-containing RNA-binding signal transduction-associated protein 1 OS=Homo sapiens OX=9606 GN=KHDRBS1 PE=1 SV=1	8	Acetylation (Protein N-term)	16	168.28			351.46	406.05	394.81	168.28	10	10	347.672	382.697	395.224	2.57973	4	0.0463016
P04279|SEMG1_HUMAN	Semenogelin-1 OS=Homo sapiens OX=9606 GN=SEMG1 PE=1 SV=2	16	Carbamidomethylation; Acetylation (Protein N-term)	48	7.4936	59.537	328.15	729.78	1221.4	434.04	7.4936	60.5989	325.748	721.915	1151.15	434.495	2.55069	6	0.0495346
Q01518|CAP1_HUMAN	Adenylyl cyclase-associated protein 1 OS=Homo sapiens OX=9606 GN=CAP1 PE=1 SV=5	13	Carbamidomethylation; Oxidation (M); Acetylation (Protein N-term)	34	0	513.7	846.61	1791.5	1803	4544.6	10	522.862	840.413	1772.19	1699.31	4549.36	2.54614	5	0.0495346
P51858|HDGF_HUMAN	Hepatoma-derived growth factor OS=Homo sapiens OX=9606 GN=HDGF PE=1 SV=1	5	Carbamidomethylation	32	0		154.17	158.03	326.54	541.89	10	10	153.041	156.327	307.76	542.458	2.54022	4	0.0463016
Q6NVV9|ADAM5_HUMAN	Putative disintegrin and metalloproteinase domain-containing protein 5 OS=Homo sapiens OX=9606 GN=ADAM5 PE=5 SV=2	1	Carbamidomethylation	3	71.75	0	0	99.693	335.35	118.1	71.75	10	10	98.6186	316.063	118.224	2.5381	4	0.0463016
P32004|L1CAM_HUMAN	Neural cell adhesion molecule L1 OS=Homo sapiens OX=9606 GN=L1CAM PE=1 SV=2	11	Carbamidomethylation; Acetylation (Protein N-term)	14	0	931.08	73.848	2636.6	1608.8	1656.2	10	947.686	73.3074	2608.18	1516.27	1657.94	2.48763	5	0.0495346
Q9UKM9|RALY_HUMAN	RNA-binding protein Raly OS=Homo sapiens OX=9606 GN=RALY PE=1 SV=1	3	Carbamidomethylation; Acetylation (Protein N-term)	23			75.209	290.67	117.42	125.23	10	10	74.6585	287.537	110.667	125.361	2.46757	4	0.0463016
P61224|RAP1B_HUMAN	Ras-related protein Rap-1b OS=Homo sapiens OX=9606 GN=RAP1B PE=1 SV=1	3	Carbamidomethylation; Acetylation (Protein N-term)	12	243.27	149.21		746.63	299.09	1214	243.27	151.871	10	738.583	281.889	1215.27	2.46426	5	0.0495346
O60449|LY75_HUMAN	Lymphocyte antigen 75 OS=Homo sapiens OX=9606 GN=LY75 PE=1 SV=3	12	Carbamidomethylation	7	69.378	0	50.626	519.34	113	72.206	69.378	10	50.2554	513.743	106.501	72.2817	2.41743	5	0.0495346
Q9UBQ7|GRHPR_HUMAN	Glyoxylate reductase/hydroxypyruvate reductase OS=Homo sapiens OX=9606 GN=GRHPR PE=1 SV=1	8	Carbamidomethylation; Acetylation (Protein N-term)	34	249.6	198.04	227.77	1378	570.29	1643.5	249.6	201.572	226.103	1363.15	537.491	1645.22	2.38832	6	0.0495346
O43173|SIA8C_HUMAN	Sia-alpha-2 3-Gal-beta-1 4-GlcNAc-R:alpha 2 8-sialyltransferase OS=Homo sapiens OX=9606 GN=ST8SIA3 PE=1 SV=3	14	Carbamidomethylation; Oxidation (M); Acetylation (Protein N-term)	43	2798.4	3911.1	1224.7	4784	4832.9	32118	2798.4	3980.86	1215.74	4732.44	4554.95	32151.7	2.37382	6	0.0495346
P23582|ANFC_HUMAN	C-type natriuretic peptide OS=Homo sapiens OX=9606 GN=NPPC PE=1 SV=1	8	Carbamidomethylation; Acetylation (Protein N-term)	45	1459.7	146.25	292.76	4603.6	3102.7	2347.5	1459.7	148.858	290.617	4553.99	2924.26	2349.96	2.37155	6	0.0495346
Q8NCL4|GALT6_HUMAN	Polypeptide N-acetylgalactosaminyltransferase 6 OS=Homo sapiens OX=9606 GN=GALNT6 PE=2 SV=2	13	Carbamidomethylation; Oxidation (M); Acetylation (Protein N-term)	26	389.45	440.74	294.39	2055	1559.2	2270.2	389.45	448.601	292.235	2032.85	1469.53	2272.58	2.35312	6	0.0495346
P49721|PSB2_HUMAN	Proteasome subunit beta type-2 OS=Homo sapiens OX=9606 GN=PSMB2 PE=1 SV=1	2	Carbamidomethylation	12				32.91	55.3	67.275	10	10	10	32.5553	52.1196	67.3455	2.34123	3	0.036904
Q99988|GDF15_HUMAN	Growth/differentiation factor 15 OS=Homo sapiens OX=9606 GN=GDF15 PE=1 SV=3	9	Carbamidomethylation; Acetylation (Protein N-term)	38	165.98	301.84	394.97	1493	1196.1	1737.6	165.98	307.223	392.079	1476.91	1127.31	1739.42	2.32766	6	0.0495346
O60256|KPRB_HUMAN	Phosphoribosyl pyrophosphate synthase-associated protein 2 OS=Homo sapiens OX=9606 GN=PRPSAP2 PE=1 SV=1	8	Carbamidomethylation; Oxidation (M); Acetylation (Protein N-term)	33	123.68	384.9	157.62	797.98	882.88	1552.4	123.68	391.765	156.466	789.38	832.103	1554.03	2.24065	6	0.0495346
Q95IE3|2B1C_HUMAN	HLA class II histocompatibility antigen DRB1-12 beta chain OS=Homo sapiens OX=9606 GN=HLA-DRB1 PE=1 SV=1	3	Carbamidomethylation	29	22.543			40.96	52.125	110.13	22.543	10	10	40.5186	49.1272	110.245	2.23222	4	0.0463016
P0DJI8|SAA1_HUMAN	Serum amyloid A-1 protein OS=Homo sapiens OX=9606 GN=SAA1 PE=1 SV=1	4	Oxidation (M)	70	685.61	1480.8	791.75	2317.2	8039.2	3567.1	685.61	1507.21	785.954	2292.23	7576.85	3570.84	2.17373	6	0.0495346
Q8TB73|NDNF_HUMAN	Protein NDNF OS=Homo sapiens OX=9606 GN=NDNF PE=1 SV=2	5	Carbamidomethylation; Acetylation (Protein N-term)	11		10.752		33.216	36.186	71.604	10	10.9438	10	32.858	34.1049	71.679	2.16364	4	0.0463016
P60660|MYL6_HUMAN	Myosin light polypeptide 6 OS=Homo sapiens OX=9606 GN=MYL6 PE=1 SV=2	4	Acetylation (Protein N-term)	44	161.98	188.97	113.89	448.74	872.03	788.63	161.98	192.34	113.056	443.904	821.877	789.456	2.13665	6	0.0495346
P52907|CAZA1_HUMAN	F-actin-capping protein subunit alpha-1 OS=Homo sapiens OX=9606 GN=CAPZA1 PE=1 SV=3	6	Carbamidomethylation; Oxidation (M); Acetylation (Protein N-term)	37	78.819	118.38	199.77	960.64	557.65	256.2	78.819	120.491	198.308	950.287	525.578	256.468	2.12326	6	0.0495346
Q5VTE0|EF1A3_HUMAN	Putative elongation factor 1-alpha-like 3 OS=Homo sapiens OX=9606 GN=EEF1A1P5 PE=5 SV=1	11	Oxidation (M); Acetylation (Protein N-term)	25	401.65	441.27	161.38	1079.9	1560.2	1847.6	401.65	449.14	160.199	1068.26	1470.47	1849.54	2.11788	6	0.0495346
P59998|ARPC4_HUMAN	Actin-related protein 2/3 complex subunit 4 OS=Homo sapiens OX=9606 GN=ARPC4 PE=1 SV=3	3	Acetylation (Protein N-term)	21	239.24	74.618	22.003	321.55	502.56	622.27	239.24	75.9488	21.8419	318.085	473.657	622.922	2.06951	6	0.0495346
Q9H361|PABP3_HUMAN	Polyadenylate-binding protein 3 OS=Homo sapiens OX=9606 GN=PABPC3 PE=1 SV=2	14	Carbamidomethylation; Oxidation (M); Acetylation (Protein N-term)	32	625.32	497.24	1629.1	251.77	108.22	293.89	625.32	506.108	1617.17	249.057	101.996	294.198	-2.09077	6	0.0495346
P08185|CBG_HUMAN	Corticosteroid-binding globulin OS=Homo sapiens OX=9606 GN=SERPINA6 PE=1 SV=1	3	Acetylation (Protein N-term)	14	260.28	194.11	493.52	98.282	0	82.494	260.28	197.572	489.907	97.2228	10	82.5805	-2.32002	5	0.0495346
A0A0B4J1Y9|HV372_HUMAN	Immunoglobulin heavy variable 3-72 OS=Homo sapiens OX=9606 GN=IGHV3-72 PE=3 SV=1	5	Carbamidomethylation; Oxidation (M); Acetylation (Protein N-term)	65	1227.6	585.79	501.36	59.604	254.3	155	1227.6	596.238	497.69	58.9616	239.675	155.162	-2.35495	6	0.0495346
P53396|ACLY_HUMAN	ATP-citrate synthase OS=Homo sapiens OX=9606 GN=ACLY PE=1 SV=3	26	Carbamidomethylation; Oxidation (M); Acetylation (Protein N-term)	31	15273	2673.9	2629.6	9.5812	2158.4	1847.5	15273	2721.59	2610.35	9.47794	2034.27	1849.44	-2.40397	6	0.0495346
Q9NQ75|CASS4_HUMAN	Cas scaffolding protein family member 4 OS=Homo sapiens OX=9606 GN=CASS4 PE=1 SV=2	4	Carbamidomethylation	8	604.46	460.77	1241.2	18.332		329.12	604.46	468.988	1232.11	18.1344	10	329.465	-2.6887	5	0.0495346
P01699|LV144_HUMAN	Immunoglobulin lambda variable 1-44 OS=Homo sapiens OX=9606 GN=IGLV1-44 PE=1 SV=2	2		18	21452	8352	8006.4	1615.8	3225.9	929.01	21452	8500.96	7947.79	1598.39	3040.37	929.984	-2.7668	6	0.0495346
P01700|LV147_HUMAN	Immunoglobulin lambda variable 1-47 OS=Homo sapiens OX=9606 GN=IGLV1-47 PE=1 SV=2	3		29	21452	8352	8006.4	1615.8	3225.9	929.01	21452	8500.96	7947.79	1598.39	3040.37	929.984	-2.7668	6	0.0495346
P61916|NPC2_HUMAN	NPC intracellular cholesterol transporter 2 OS=Homo sapiens OX=9606 GN=NPC2 PE=1 SV=1	2	Carbamidomethylation	17	275.24	375.72	2135.8	274.61	92.41		275.24	382.421	2120.17	271.65	87.0953	10	-2.91326	5	0.0495346
A0FGR9|ESYT3_HUMAN	Extended synaptotagmin-3 OS=Homo sapiens OX=9606 GN=ESYT3 PE=1 SV=1	2	Carbamidomethylation	3	3478.1	1765	1837	254.14	693.26	0	3478.1	1796.48	1823.55	251.401	653.389	10	-2.95593	5	0.0495346
P53621|COPA_HUMAN	Coatomer subunit alpha OS=Homo sapiens OX=9606 GN=COPA PE=1 SV=2	7	Carbamidomethylation; Acetylation (Protein N-term)	10	2962.1	208.57	231.3	169.17	132.28	84.789	2962.1	212.29	229.607	167.347	124.672	84.8779	-3.17499	6	0.0495346
Q96FJ2|DYL2_HUMAN	Dynein light chain 2 cytoplasmic OS=Homo sapiens OX=9606 GN=DYNLL2 PE=1 SV=1	5	Carbamidomethylation	56	587.84	858.97	5129.9	558.88	159.14	0	587.84	874.29	5092.35	552.857	149.987	10	-3.20082	5	0.0495346
O95747|OXSR1_HUMAN	Serine/threonine-protein kinase OSR1 OS=Homo sapiens OX=9606 GN=OXSR1 PE=1 SV=1	12	Carbamidomethylation; Acetylation (Protein N-term)	24	1620.5	726.19	807.16	52.721	0	263.3	1620.5	739.142	801.252	52.1528	10	263.576	-3.27859	5	0.0495346
Q5T750|XP32_HUMAN	Skin-specific protein 32 OS=Homo sapiens OX=9606 GN=XP32 PE=1 SV=1	2		10	114.56	116.9	202.26	0	0		114.56	118.985	200.779	10	10	10	-3.85574	3	0.036904
P19957|ELAF_HUMAN	Elafin OS=Homo sapiens OX=9606 GN=PI3 PE=1 SV=3	4	Carbamidomethylation; Acetylation (Protein N-term)	39	54.144	25.632	483.27		13.573		54.144	26.0892	479.732	10	12.7924	10	-4.09391	4	0.0463016
Q04826|1B40_HUMAN	HLA class I histocompatibility antigen B-40 alpha chain OS=Homo sapiens OX=9606 GN=HLA-B PE=1 SV=1	3	Carbamidomethylation; Acetylation (Protein N-term)	44	118.09	361.28	78.53		0		118.09	367.724	77.9552	10	10	10	-4.23207	3	0.036904
P30613|KPYR_HUMAN	Pyruvate kinase PKLR OS=Homo sapiens OX=9606 GN=PKLR PE=1 SV=2	6	Carbamidomethylation; Acetylation (Protein N-term)	17	612.9	113.91	72.112			21.395	612.9	115.942	71.5841	10	10	21.4174	-4.27246	4	0.0463016
Q9P0K1|ADA22_HUMAN	Disintegrin and metalloproteinase domain-containing protein 22 OS=Homo sapiens OX=9606 GN=ADAM22 PE=1 SV=1	17	Carbamidomethylation; Oxidation (M); Acetylation (Protein N-term)	25	1122.6	282.48	414.13	27.827		49.197	1122.6	287.518	411.099	27.5271	10	49.2486	-4.39147	5	0.0495346
Q4KMG0|CDON_HUMAN	Cell adhesion molecule-related/down-regulated by oncogenes OS=Homo sapiens OX=9606 GN=CDON PE=1 SV=2	4	Carbamidomethylation; Oxidation (M)	6	141.2	74.43	439.93			0	141.2	75.7575	436.71	10	10	10	-4.44552	3	0.036904
Q92508|PIEZ1_HUMAN	Piezo-type mechanosensitive ion channel component 1 OS=Homo sapiens OX=9606 GN=PIEZO1 PE=1 SV=4	7	Acetylation (Protein N-term)	4	19581	1051	640.55	612.54	0		19581	1069.74	635.861	605.939	10	10	-5.08778	4	0.0463016
Q15782|CH3L2_HUMAN	Chitinase-3-like protein 2 OS=Homo sapiens OX=9606 GN=CHI3L2 PE=1 SV=1	2	Oxidation (M)	7	1146.1	55.742	20.1				1146.1	56.7362	19.9529	10	10	10	-5.34907	3	0.036904
Q9C0G6|DYH6_HUMAN	Dynein heavy chain 6 axonemal OS=Homo sapiens OX=9606 GN=DNAH6 PE=2 SV=3	13	Carbamidomethylation; Oxidation (M); Acetylation (Protein N-term)	4	1139.8	161.69	206.93	0		0	1139.8	164.574	205.415	10	10	10	-5.65324	3	0.036904
P55001|MFAP2_HUMAN	Microfibrillar-associated protein 2 OS=Homo sapiens OX=9606 GN=MFAP2 PE=2 SV=1	1	Carbamidomethylation	5	101.22	203.26	1819.4	0	21.422		101.22	206.885	1806.08	10	20.19	10	-5.71712	4	0.0463016
P18627|LAG3_HUMAN	Lymphocyte activation gene 3 protein OS=Homo sapiens OX=9606 GN=LAG3 PE=1 SV=5	3		5	12079	12449	374.22	218.84		110.61	12079	12671	371.481	216.482	10	110.726	-6.21914	5	0.0495346
P01599|KV117_HUMAN	Immunoglobulin kappa variable 1-17 OS=Homo sapiens OX=9606 GN=IGKV1-17 PE=1 SV=2	2		16	3464.6	1071.4	2954.1	71.184		0	3464.6	1090.51	2932.48	70.4168	10	10	-6.37177	4	0.0463016
